# Supplementary material
Source: PubMed Central journal article supplement (PMC5338680)
Supplement: supp_pp.16.01959_PP2016-01959DR1_Table_S2.pdf [file supp_pp.16.01959_PP2016-01959DR1_Table_S2.pdf]

**Table S2.** List of differentially expressed oxidative stress related transcripts in non-mycorrhizal *A*

| <b>Locus Name Mt4.0v1</b>                               | <b>Gene ID</b> | <b>Regulation in -K</b> |
|---------------------------------------------------------|----------------|-------------------------|
| <b>Cytochrome P450 enzymes</b>                          |                |                         |
| Flavonoid hydroxylase                                   | Medtr3g024520  | UP                      |
| Cytochrome P450 family 72 protein                       | Medtr0025s0110 | UP                      |
| Cytochrome P450 family 76 protein                       | Medtr1g091010  | DOWN                    |
| Cytochrome P450 family 71 protein                       | Medtr3g058210  | DOWN                    |
| Cytochrome P450 family 71 protein                       | Medtr3g058220  | DOWN                    |
| Cytochrome P450 family 722 protein                      | Medtr8g076940  | DOWN                    |
| Cytochrome P450 family 71 protein                       | Medtr3g058110  | DOWN                    |
| Cytochrome P450 family 72 protein                       | Medtr2g023680  | DOWN                    |
| Cytochrome P450 family 76 protein                       | Medtr7g103450  | DOWN                    |
| Cytochrome P450 superfamily protein                     | Medtr8g020960  | DOWN                    |
| Cytochrome P450 family 71 protein                       | Medtr0554s0020 | DOWN                    |
| Cytochrome P450 family 72 protein                       | Medtr2g055430  | DOWN                    |
| Cytochrome P450 family 76 protein                       | Medtr1g116890  | DOWN                    |
| Cytochrome P450 family 71 protein                       | Medtr3g057910  | DOWN                    |
| Cytochrome P450 family 82 protein                       | Medtr4g018800  | DOWN                    |
| Cytochrome P450 family 71 protein                       | Medtr0059s0170 | DOWN                    |
| Cytochrome P450 family flavone synthase                 | Medtr4g062500  | DOWN                    |
| <b>Dehydrogenases</b>                                   |                |                         |
| Zinc-binding alcohol dehydrogenase family protein       | Medtr3g089977  | UP                      |
| Zinc-binding alcohol dehydrogenase family protein       | Medtr3g089940  | UP                      |
| L-lactate dehydrogenase A-like protein                  | Medtr5g012390  | UP                      |
| NADP-dependent glyceraldehyde-3-phosphate dehydrogenase | Medtr1g014320  | UP                      |
| NAD-dependent aldehyde dehydrogenase family protein     | Medtr3g078490  | DOWN                    |
| Phenylpropanal double-bond reductase                    | Medtr2g088190  | DOWN                    |
| <b>Oxidases</b>                                         |                |                         |
| 1-aminocyclopropane-1-carboxylate oxidase               | Medtr6g092620  | UP                      |
| Ubiquinol oxidase 1a                                    | Medtr5g070680  | DOWN                    |
| Cytokinin oxidase/dehydrogenase-like protein            | Medtr2g039410  | DOWN                    |
| Amine oxidase                                           | Medtr4g117670  | DOWN                    |
| <b>Oxygenases</b>                                       |                |                         |
| Prolyl 4-hydroxylase alpha-like protein                 | Medtr8g074810  | UP                      |
| Flavin containing monooxygenase-like protein            | Medtr2g044140  | UP                      |
| 2OG-Fe(II) oxygenase family oxidoreductase              | Medtr5g055800  | UP                      |
| Gibberellin 2-beta-dioxygenase                          | Medtr1g034120  | UP                      |
| Flavin-binding monooxygenase-like protein               | Medtr7g107710  | UP                      |
| 1-aminocyclopropane-1-carboxylate oxidase-like protein  | Medtr8g009090  | UP                      |
| 2OG-Fe(II) oxygenase family oxidoreductase              | Medtr2g437380  | DOWN                    |
| 2OG-Fe(II) oxygenase family oxidoreductase              | Medtr2g069090  | DOWN                    |

|                                                 |                |      |
|-------------------------------------------------|----------------|------|
| 2OG-Fe(II) oxygenase family oxidoreductase      | Medtr3g092890  | DOWN |
| Aminocyclopropanecarboxylate oxidase            | Medtr1g070120  | DOWN |
| 2OG-Fe(II) oxygenase family oxidoreductase      | Medtr7g062550  | DOWN |
| <b>Peroxidases</b>                              |                |      |
| Cationic peroxidase                             | Medtr1g086490  | UP   |
| Cationic peroxidase                             | Medtr1g066640  | UP   |
| Peroxidase family protein                       | Medtr5g074740  | UP   |
| Cationic peroxidase                             | Medtr2g008710  | UP   |
| Cationic peroxidase                             | Medtr3g466180  | UP   |
| Cationic peroxidase                             | Medtr1g038680  | UP   |
| Class III peroxidase                            | Medtr4g127670  | DOWN |
| Cationic peroxidase                             | Medtr7g026990  | DOWN |
| <b>Redox proteins</b>                           |                |      |
| Monothiol glutaredoxin-S2 protein               | Medtr1g088920  | UP   |
| Glutaredoxin-C1 protein                         | Medtr1g088910  | UP   |
| Monothiol glutaredoxin-S2 protein               | Medtr7g108200  | UP   |
| Thioredoxin                                     | Medtr5g037950  | DOWN |
| Thioredoxin                                     | Medtr5g037930  | DOWN |
| <b>Reductases</b>                               |                |      |
| Oxidoreductase/ferric-chelate reductase         | Medtr8g028780  | UP   |
| Dihydrodipicolinate reductase                   | Medtr8g028145  | DOWN |
| Aldo/keto reductase family oxidoreductase       | Medtr8g070115  | DOWN |
| Aldo/keto reductase family oxidoreductase       | Medtr7g114990  | DOWN |
| NADP-dependent alkenal double bond reductase P1 | Medtr0011s0280 | DOWN |
| <b>Others</b>                                   |                |      |
| NAD(P)-binding rossmann-fold protein            | Medtr7g063270  | UP   |
| FAD-dependent urate hydroxylase-like protein    | Medtr1g112740  | UP   |
| Stearoyl-acyl-carrier desaturase                | Medtr1g029150  | UP   |
| Lipoxygenase                                    | Medtr8g018590  | DOWN |
| fatty acid/sphingolipid desaturase              | Medtr1g016070  | DOWN |
| Lipoxygenase                                    | Medtr8g018650  | DOWN |

---

*V. truncatula* roots under continuous potassium deprivation. Transcripts were annotated with

---

**Log<sub>2</sub> ratio**  
**+K vs -K**

---

- 1.09907
- 0.750407
- 0.598016
- 0.624218
- 0.650619
- 0.697923
- 0.701513
- 0.742794
- 0.762278
- 0.794491
- 0.806191
- 0.827122
- 0.851278
- 0.949323
- 0.982724
- 1.16453
- 1.96034
  
- 1.11583
- 0.90046
- 0.834419
- 0.828013
- 0.635433
- 0.719258
  
- 1.06868
- 0.655484
- 0.667991
- 0.907592
  
- 1.27321
- 1.1374
- 0.976077
- 0.914764
- 0.78409
- 0.620523
- 0.610726
- 0.646106

-0.665597  
-0.88131  
-1.8818

2.78538  
1.07482  
1.01871  
0.661104  
0.656326  
0.59106  
-0.676641  
-1.12505

1.52612  
1.27882  
0.755123  
-0.629741  
-0.718586

0.863287  
-0.615699  
-0.657931  
-0.83325  
-1.16771

1.8338  
0.990197  
0.897026  
-0.669985  
-0.784028  
-0.859605

† the Mt4.0v1 version of *M. truncatula* genomic database (<http://jcvi.org/medicago/index.php>).
