# Supplementary material
Source: PubMed Central journal article supplement (PMC5338680)
Supplement: supp_pp.16.01959_PP2016-01959DR1_Table_S3.pdf [file supp_pp.16.01959_PP2016-01959DR1_Table_S3.pdf]

**Table S3.** List of differentially expressed hydrolase transcripts in non-mycorrhizal *M. trun*

**Locus Name Mt4.0v1**

AAA-type ATPase family protein  
ribonuclease 1  
P-loop containing nucleoside triphosphate hydrolases superfamily protein  
Arginase/deacetylase superfamily protein  
Minichromosome maintenance (MCM2/3/5) family protein  
Glycosyl hydrolase family protein  
minichromosome maintenance (MCM2/3/5) family protein  
apyrase 2  
Helicase protein with RING/U-box domain  
pleiotropic drug resistance 12  
Protein phosphatase 2C family protein  
Glycosyl hydrolase family protein  
Glycosyl hydrolase family protein  
minichromosome maintenance (MCM2/3/5) family protein  
xyloglucan endotransglucosylase/hydrolase 5  
Kinesin motor family protein  
Plant invertase/pectin methylesterase inhibitor superfamily  
chitinase A  
P-loop containing nucleoside triphosphate hydrolases superfamily protein  
purple acid phosphatase 27  
P-loop containing nucleoside triphosphate hydrolases superfamily protein  
P-loop containing nucleoside triphosphate hydrolases superfamily protein  
n/a  
Subtilisin-like serine endopeptidase family protein  
xyloglucan endotransglucosylase/hydrolase 16  
Ribonuclease T2 family protein  
Plant invertase/pectin methylesterase inhibitor superfamily  
P-loop containing nucleoside triphosphate hydrolases superfamily protein  
RHO-related protein from plants 9  
Minichromosome maintenance (MCM2/3/5) family protein  
glycosyl hydrolase 9B13  
Kinesin motor family protein  
Plant invertase/pectin methylesterase inhibitor superfamily  
heat shock protein 101  
serine carboxypeptidase-like 9  
basic chitinase  
type one serine/threonine protein phosphatase 4  
Plant invertase/pectin methylesterase inhibitor superfamily  
ATP binding microtubule motor family protein

Disease resistance protein (TIR-NBS-LRR class) family  
HAL2-like  
Pectin lyase-like superfamily protein  
Haloacid dehalogenase-like hydrolase (HAD) superfamily protein  
glycosyl hydrolase 9B15  
Subtilisin-like serine endopeptidase family protein  
beta glucosidase 17  
Cysteine proteinases superfamily protein

*catula* roots under continuous potassium deprivation. Transcripts were annotated with the Mt4.0v1

| Gene ID        | Regulation<br>in -K | Log <sub>2</sub> ratio +K<br>vs -K |
|----------------|---------------------|------------------------------------|
| Medtr4g077880  | DOWN                | -1.40847                           |
| Medtr5g040940  | DOWN                | -1.08022                           |
| Medtr4g114120  | DOWN                | -1.00446                           |
| Medtr0088s0100 | DOWN                | -1.00083                           |
| Medtr4g071090  | DOWN                | -0.855956                          |
| Medtr5g062320  | DOWN                | -0.828105                          |
| Medtr4g122270  | DOWN                | -0.817807                          |
| Medtr7g085120  | DOWN                | -0.797378                          |
| Medtr1g044120  | DOWN                | -0.773212                          |
| Medtr4g011630  | DOWN                | -0.77298                           |
| Medtr5g024340  | DOWN                | -0.768248                          |
| Medtr5g062430  | DOWN                | -0.758044                          |
| Medtr5g069800  | DOWN                | -0.756467                          |
| Medtr8g090000  | DOWN                | -0.736981                          |
| Medtr7g084750  | DOWN                | -0.731848                          |
| Medtr5g094310  | DOWN                | -0.725471                          |
| Medtr8g042910  | DOWN                | -0.724164                          |
| Medtr2g040830  | DOWN                | -0.717756                          |
| Medtr5g066320  | DOWN                | -0.694651                          |
| Medtr4g037670  | DOWN                | -0.693954                          |
| Medtr1g075680  | DOWN                | -0.692995                          |
| Medtr1g017540  | DOWN                | -0.671819                          |
| Medtr0002s1060 | DOWN                | -0.660572                          |
| Medtr7g081420  | DOWN                | -0.658442                          |
| Medtr3g084630  | DOWN                | -0.636586                          |
| Medtr5g041080  | DOWN                | -0.635431                          |
| Medtr4g035980  | DOWN                | -0.634356                          |
| Medtr7g105030  | DOWN                | -0.626468                          |
| Medtr6g087980  | DOWN                | -0.621774                          |
| Medtr4g096700  | DOWN                | -0.617833                          |
| Medtr1g088190  | DOWN                | -0.60876                           |
| Medtr3g055940  | DOWN                | -0.598559                          |
| Medtr2g044810  | DOWN                | -0.595938                          |
| Medtr4g109450  | UP                  | 0.606699                           |
| Medtr2g018630  | UP                  | 0.626348                           |
| Medtr8g074335  | UP                  | 0.627604                           |
| Medtr5g081230  | UP                  | 0.658689                           |
| Medtr4g025690  | UP                  | 0.694371                           |
| Medtr4g124650  | UP                  | 0.794908                           |

|               |    |         |
|---------------|----|---------|
| Medtr6g076090 | UP | 1.01477 |
| Medtr4g090525 | UP | 1.04389 |
| Medtr3g030540 | UP | 1.07383 |
| Medtr2g035440 | UP | 1.11761 |
| Medtr5g010000 | UP | 1.12027 |
| Medtr1g006990 | UP | 1.20378 |
| Medtr3g026400 | UP | 1.3988  |
| Medtr4g080360 | UP | 1.45599 |

version of *M. truncatula* genomic database (<http://jcvi.org/medicago/index.php>).
