# Supplementary material
Source: PubMed Central journal article supplement (PMC5338680)
Supplement: supp_pp.16.01959_PP2016-01959DR1_Table_S5.pdf [file supp_pp.16.01959_PP2016-01959DR1_Table_S5.pdf]

**Table S5.** List of transcripts differentially regulated in *M. truncatula* roots in comparison to

| AM+K (268)     | log2<br>Annotation | AM+K (85)      | log2<br>Annotation        |
|----------------|--------------------|----------------|---------------------------|
| Medtr2g088610  | inf Late embryog   | Medtr1g062590  | -1.49338 Pathogenesis     |
| Medtr3g036335  | inf F-box family   | Medtr1g037310  | -1.40851 Zinc finger, C   |
| Medtr4g036300  | inf 0              | Medtr1g099310  | -1.15929 chitinase A      |
| Medtr4g091150  | inf FAD-binding    | Medtr4g088375  | -1.14066 homeobox-1       |
| Medtr4g020520  | inf disease resist | Medtr5g041190  | -1.09455 0                |
| Medtr4g036290  | inf 0              | Medtr3g007650  | -1.08921 S-locus lectin   |
| Medtr4g064873  | inf C2H2 and C2    | Medtr1g040525  | -1.06538 Leucine-rich r   |
| Medtr4g083110  | inf 0              | Medtr8g019330  | -1.05667 0                |
| Medtr4g097670  | inf xyloglucan er  | Medtr6g071895  | -1.05405 disease resist   |
| Medtr5g005290  | inf 0              | Medtr7g101800  | -1.0118 Protein kinas     |
| Medtr5g005570  | inf gibberellin 2- | Medtr7g027960  | -0.994467 cytochrome P    |
| Medtr5g058320  | inf UDP-Glycosyl   | Medtr4g114250  | -0.983062 receptor-like   |
| Medtr5g062030  | inf 0              | Medtr3g013970  | -0.979009 Ubiquitin car   |
| Medtr6g014040  | inf UDP-glucosyl   | Medtr4g070370  | -0.902565 NmrA-like ne    |
| Medtr6g071605  | inf annexin 5      | Medtr4g128580  | -0.888797 xyloglucan er   |
| Medtr7g011630  | inf related to AP  | Medtr1g101250  | -0.888548 disease resist  |
| Medtr7g076960  | inf 0              | Medtr1g086390  | -0.879515 Pectin lyase-l  |
| Medtr7g080530  | inf 2-phosphogly   | Medtr3g110330  | -0.853762 NADP-malic e    |
| Medtr7g076970  | inf 0              | Medtr8g022790  | -0.848232 GDSL lipase 1   |
| Medtr7g076990  | inf 0              | Medtr4g019225  | -0.838075 laccase 7       |
| Medtr7g087170  | inf F-box family   | Medtr5g079890  | -0.837402 Calcium-depe    |
| Medtr7g096660  | inf 0              | Medtr1514s0010 | -0.836582 NB-ARC dom.     |
| Medtr7g105400  | inf alpha/beta-H   | Medtr6g021870  | -0.83216 0                |
| Medtr8g012870  | inf Arabidopsis c  | Medtr2g011270  | -0.831936 S-locus lectin  |
| Medtr8g031120  | inf 0              | Medtr5g055680  | -0.820116 senescence-r    |
| Medtr8g031160  | inf 0              | Medtr4g052620  | -0.819511 NAC domain      |
| Medtr8g067960  | inf Concanavalin   | Medtr7g013240  | -0.817202 UDP-Glycosyl    |
| Medtr8g074750  | inf ammonium t     | Medtr4g087100  | -0.812621 2-oxoglutaraf   |
| Medtr8g019710  | inf RING/U-box s   | Medtr2g073420  | -0.809852 cytochrome P    |
| Medtr8g467650  | inf chitinase A    | Medtr6g021850  | -0.807173 0               |
| Medtr8g071815  | inf RING/U-box s   | Medtr5g048050  | -0.807162 ARM repeat s    |
| Medtr0302s0030 | inf kunitz trypsin | Medtr8g031400  | -0.798247 GDSL-motif li   |
| Medtr0328s0040 | inf Thioredoxin s  | Medtr5g021390  | -0.795541 ferulic acid 5- |
| Medtr2g010320  | inf cytochrome f   | Medtr7g113410  | -0.794228 lipoxygenase    |
| Medtr2g093750  | inf Seven transm   | Medtr1g080990  | -0.792262 0               |

|                |         |                |                |           |                |
|----------------|---------|----------------|----------------|-----------|----------------|
| Medtr3g112470  | 4.73182 | peptide trans  | Medtr4g114980  | -0.784751 | WUS-interact   |
| Medtr7g098150  | 4.71822 | peptide trans  | Medtr5g077760  | -0.781865 | 0              |
| Medtr4g080730  | 4.52235 | senescence-a   | Medtr6g082130  | -0.779729 | 0              |
| Medtr2g034950  | 4.22856 | COBRA-like p   | Medtr3g109820  | -0.776679 | Leucine-rich r |
| Medtr1g090783  | 4.01004 | AGAMOUS-lii    | Medtr2g102640  | -0.769432 | pleiotropic dr |
| Medtr4g057865  | 3.83154 | nitrate transp | Medtr4g057960  | -0.76302  | P-loop contain |
| Medtr8g078300  | 3.52813 | Protein kinas  | Medtr4g053785  | -0.757493 | Jojoba acyl Co |
| Medtr2g062310  | 3.52226 | Domain of ur   | Medtr2g099470  | -0.751249 | homolog of c   |
| Medtr2g090050  | 3.29012 | Family of unk  | Medtr6g021830  | -0.737307 | 0              |
| Medtr4g109380  | 3.20387 | 0              | Medtr7g028432  | -0.734544 | Leucine-rich r |
| Medtr4g057890  | 3.15432 | nitrate transp | Medtr6g088450  | -0.732968 | polyol/mono    |
| Medtr7g106880  | 2.96923 | ABC-2 type tr  | Medtr6g071340  | -0.730774 | ARM repeat s   |
| Medtr1g096030  | 2.79556 | GRAS family 1  | Medtr8g093010  | -0.722223 | RING/U-box s   |
| Medtr6g011860  | 2.72648 | NAC (No Apic   | Medtr4g060890  | -0.698485 | 0              |
| Medtr2g438310  | 2.59705 | 0              | Medtr3g094630  | -0.697665 | Peroxidase su  |
| Medtr1g027570  | 2.55122 | wall-associat  | Medtr8g010200  | -0.697439 | 0              |
| Medtr5g017290  | 2.54927 | Remorin fam    | Medtr2g031530  | -0.695685 | Wall-associat  |
| Medtr7g105460  | 2.50513 | NAD(P)-bindi   | Medtr4g094772  | -0.684681 | cytochrome f   |
| Medtr5g004650  | 2.45669 | 0              | Medtr1g008740  | -0.676104 | NAC domain     |
| Medtr4g104410  | 2.43951 | Transducin/V   | Medtr2g015050  | -0.67565  | Integrase-typ  |
| Medtr7g091570  | 2.43648 | NB-ARC dom     | Medtr5g006160  | -0.673908 | receptor-like  |
| Medtr2g438320  | 2.39359 | 0              | Medtr0052s0070 | -0.671857 | 0              |
| Medtr5g012270  | 2.26557 | nitrate transp | Medtr8g040080  | -0.67109  | VQ motif-con   |
| Medtr2g438560  | 2.20139 | 0              | Medtr7g100240  | -0.658474 | Protein phosp  |
| Medtr1g079440  | 2.16166 | Protein kinas  | Medtr4g119790  | -0.655131 | flowering pro  |
| Medtr8g010530  | 2.09416 | Seven transm   | Medtr3g055610  | -0.654912 | PLC-like phos  |
| Medtr6g045097  | 2.06121 | Kunitz family  | Medtr5g036410  | -0.653254 | matrix metall  |
| Medtr4g111975  | 2.04298 | Duplicated h   | Medtr3g464650  | -0.651389 | Protein phosp  |
| Medtr4g018760  | 1.92797 | Nucleotide-si  | Medtr5g004800  | -0.647537 | Calcium-depe   |
| Medtr3g081040  | 1.92384 | Myzus persic   | Medtr4g126920  | -0.647468 | Xyloglucan er  |
| Medtr1g054035  | 1.8732  | fatty acid des | Medtr3g088760  | -0.642588 | wall-associat  |
| Medtr5g010350  | 1.84539 | root hair spe  | Medtr4g064887  | -0.640506 | NAD(P)-bindi   |
| Medtr8g042870  | 1.80808 | zinc induced   | Medtr6g009720  | -0.635402 | P-loop contain |
| Medtr7g033325  | 1.80643 | beta-1,4-N-ar  | Medtr5g076170  | -0.634614 | Late embryog   |
| Medtr0391s0020 | 1.73442 | Disease resis  | Medtr4g087925  | -0.632822 | glutamate re   |
| Medtr3g058630  | 1.72676 | zinc transpor  | Medtr5g016440  | -0.630822 | cytochrome f   |
| Medtr8g068300  | 1.71633 | Deoxyxylulos   | Medtr2g089120  | -0.62978  | terpene syntl  |
| Medtr3g085630  | 1.68128 | 0              | Medtr7g058640  | -0.626432 | synaptobrevi   |
| Medtr5g092150  | 1.64574 | cytochrome f   | Medtr3g021430  | -0.624004 | O-methyltrar   |
| Medtr5g084090  | 1.5965  | 0              | Medtr6g091680  | -0.61409  | S-adenosyl-L-  |
| Medtr4g029270  | 1.59515 | 0              | Medtr5g010640  | -0.611803 | osmotin 34     |
| Medtr4g052040  | 1.59158 | ovate family   | Medtr6g005330  | -0.605061 | RmLC-like cup  |
| Medtr4g119500  | 1.58053 | nuclear facto  | Medtr5g027810  | -0.598492 | NB-ARC dom     |

|               |         |                                                           |               |           |                |
|---------------|---------|-----------------------------------------------------------|---------------|-----------|----------------|
| Medtr7g085810 | 1.57723 | related to AP                                             | Medtr6g034930 | -0.595482 | extensin 3     |
| Medtr7g101190 | 1.56383 | plasma mem                                                | Medtr4g020110 | -0.595243 | delta 1-pyrro  |
| Medtr3g467130 | 1.52884 | cytochrome f                                              | Medtr3g088750 | -0.593824 | wall associat  |
| Medtr7g082810 | 1.50472 | MATE efflux                                               | Medtr8g080770 | -0.589097 | histidine kina |
| Medtr3g008760 | 1.4917  | Plant inverta                                             | Medtr1g105820 | -0.588637 | cysteine-rich  |
| Medtr8g018570 | 1.47837 | lipoxygenase                                              | Medtr5g095120 | -0.587996 | receptor like  |
| Medtr3g057970 | 1.47164 | cytochrome f                                              | Medtr5g013260 | -0.585609 | FAD/NAD(P)-    |
| Medtr8g069350 | 1.46429 | 0                                                         |               |           |                |
| Medtr4g087120 | 1.41967 | 2-oxoglutarate (2OG) and Fe(II)-dependent oxygenase supe  |               |           |                |
| Medtr1g103110 | 1.40657 | Acyl-CoA N-acyltransferases (NAT) superfamily protein     |               |           |                |
| Medtr4g075150 | 1.40558 | serine carboxypeptidase-like 34                           |               |           |                |
| Medtr2g104130 | 1.37026 | Calcium-binding EF-hand family protein                    |               |           |                |
| Medtr2g028980 | 1.36442 | peroxidase 2                                              |               |           |                |
| Medtr2g036260 | 1.34827 | 0                                                         |               |           |                |
| Medtr8g066280 | 1.34185 | P-loop containing nucleoside triphosphate hydrolases supe |               |           |                |
| Medtr4g066330 | 1.31562 | beta glucosidase 13                                       |               |           |                |
| Medtr4g050140 | 1.30802 | alpha/beta-Hydrolases superfamily protein                 |               |           |                |
| Medtr8g074920 | 1.30018 | protein kinase family protein                             |               |           |                |
| Medtr7g079440 | 1.28297 | cytochrome P450, family 97, subfamily A, polypeptide 3    |               |           |                |
| Medtr6g051680 | 1.27387 | Heavy metal transport/detoxification superfamily protein  |               |           |                |
| Medtr5g020960 | 1.26971 | Heavy metal transport/detoxification superfamily protein  |               |           |                |
| Medtr8g024310 | 1.24763 | pyruvate dehydrogenase E1 alpha                           |               |           |                |
| Medtr2g438260 | 1.23551 | 0                                                         |               |           |                |
| Medtr5g072570 | 1.23001 | serine carboxypeptidase-like 42                           |               |           |                |
| Medtr5g023370 | 1.21223 | Arabidopsis protein of unknown function (DUF241)          |               |           |                |
| Medtr4g068290 | 1.20568 | CSL zinc finger domain-containing protein                 |               |           |                |
| Medtr3g068030 | 1.20131 | rubisco activase                                          |               |           |                |
| Medtr7g077313 | 1.19697 | 0                                                         |               |           |                |
| Medtr1g073700 | 1.19683 | Cyclopropane-fatty-acyl-phospholipid synthase             |               |           |                |
| Medtr7g088790 | 1.1967  | Major facilitator superfamily protein                     |               |           |                |
| Medtr4g096690 | 1.19465 | 3-ketoacyl-acyl carrier protein synthase I                |               |           |                |
| Medtr8g031900 | 1.15979 | NAD(P)-binding Rossmann-fold superfamily protein          |               |           |                |
| Medtr1g070250 | 1.15906 | C2H2 and C2HC zinc fingers superfamily protein            |               |           |                |
| Medtr7g088350 | 1.13713 | DHHC-type zinc finger family protein                      |               |           |                |
| Medtr7g024950 | 1.1303  | Cysteine/Histidine-rich C1 domain family protein          |               |           |                |
| Medtr5g084950 | 1.12993 | Myzus persicae-induced lipase 1                           |               |           |                |
| Medtr2g034260 | 1.12864 | RGA-like 2                                                |               |           |                |
| Medtr4g021725 | 1.11814 | metallothionein 2A                                        |               |           |                |
| Medtr3g007770 | 1.11594 | cellulose synthase 5                                      |               |           |                |
| Medtr1g105965 | 1.11408 | Pyruvate kinase family protein                            |               |           |                |
| Medtr3g087980 | 1.11241 | long chain acyl-CoA synthetase 9                          |               |           |                |
| Medtr3g107393 | 1.08349 | SPX domain gene 2                                         |               |           |                |
| Medtr7g053290 | 1.07523 | NAD(P)-binding Rossmann-fold superfamily protein          |               |           |                |

|               |          |                                                               |
|---------------|----------|---------------------------------------------------------------|
| Medtr1g044105 | 1.07108  | 2-oxoglutarate (2OG) and Fe(II)-dependent oxygenase supe      |
| Medtr8g074530 | 1.06839  | Arabidopsis protein of unknown function (DUF241)              |
| Medtr8g066770 | 1.06626  | basic helix-loop-helix (bHLH) DNA-binding superfamily prot    |
| Medtr8g059425 | 1.06261  | UDP-Glycosyltransferase superfamily protein                   |
| Medtr2g064400 | 1.05216  | F-box family protein                                          |
| Medtr2g040690 | 1.03659  | chitinase A                                                   |
| Medtr1g081290 | 1.03654  | zeta-carotene desaturase                                      |
| Medtr1g019640 | 1.02488  | Calcium-binding EF-hand family protein                        |
| Medtr3g462710 | 1.0246   | peptide transporter 1                                         |
| Medtr2g025080 | 1.0164   | RING/U-box superfamily protein                                |
| Medtr4g121880 | 1.01324  | lipoamide dehydrogenase 1                                     |
| Medtr5g080660 | 1.01221  | zinc-finger protein 10                                        |
| Medtr1g099360 | 1.01047  | plastidic pyruvate kinase beta subunit 1                      |
| Medtr3g085740 | 1.00875  | NAD(P)-binding Rossmann-fold superfamily protein              |
| Medtr8g027820 | 1.00697  | Protein of unknown function (DUF 3339)                        |
| Medtr2g012320 | 1.00278  | Protein of unknown function (DUF761)                          |
| Medtr4g131180 | 0.99283  | aldehyde dehydrogenase 11A3                                   |
| Medtr7g078010 | 0.992139 | 2-oxoglutarate (2OG) and Fe(II)-dependent oxygenase supe      |
| Medtr4g133750 | 0.992026 | cytochrome P450, family 71, subfamily B, polypeptide 34       |
| Medtr6g034195 | 0.989187 | plastidic pyruvate kinase beta subunit 1                      |
| Medtr3g040370 | 0.989162 | S-adenosyl-L-methionine-dependent methyltransferases su       |
| Medtr7g117730 | 0.98606  | myb domain protein 12                                         |
| Medtr5g011060 | 0.980598 | phospholipase D beta 1                                        |
| Medtr2g096230 | 0.977868 | exocyst subunit exo70 family protein H7                       |
| Medtr3g088565 | 0.974742 | 2-oxoglutarate (2OG) and Fe(II)-dependent oxygenase supe      |
| Medtr3g049330 | 0.968162 | TRICHOME BIREFRINGENCE-LIKE 43                                |
| Medtr7g024750 | 0.961974 | Uncharacterised protein family (UPF0497)                      |
| Medtr7g105320 | 0.961372 | F-box family protein                                          |
| Medtr8g085960 | 0.961178 | related to AP2 11                                             |
| Medtr2g078730 | 0.949933 | D-aminoacid aminotransferase-like PLP-dependent enzyme        |
| Medtr1g044225 | 0.947581 | telomerase activator1                                         |
| Medtr4g063885 | 0.94541  | 0                                                             |
| Medtr4g057595 | 0.941721 | serine carboxypeptidase-like 48                               |
| Medtr1g062200 | 0.940311 | 0                                                             |
| Medtr7g044980 | 0.936351 | 0                                                             |
| Medtr4g094265 | 0.934746 | Thioesterase superfamily protein                              |
| Medtr7g044920 | 0.931519 | 0                                                             |
| Medtr3g031380 | 0.929743 | catalytics;transferases;[acyl-carrier-protein] S-malonyltrans |
| Medtr6g082330 | 0.928783 | Copper transport protein family                               |
| Medtr5g014370 | 0.922306 | 0                                                             |
| Medtr2g010970 | 0.915447 | Protein of unknown function, DUF538                           |
| Medtr7g056803 | 0.912462 | 0                                                             |
| Medtr1g103020 | 0.910207 | 3-ketoacyl-acyl carrier protein synthase I                    |

|                |          |                                                                         |
|----------------|----------|-------------------------------------------------------------------------|
| Medtr2g069020  | 0.909122 | 2-oxoglutarate (2OG) and Fe(II)-dependent oxygenase superfamily protein |
| Medtr4g122110  | 0.901663 | Disease resistance-responsive (dirigent-like protein) family protein    |
| Medtr4g059680  | 0.900015 | beta-galactosidase 8                                                    |
| Medtr3g020780  | 0.892262 | cytochrome P450, family 93, subfamily D, polypeptide 1                  |
| Medtr5g093570  | 0.887499 | PYRIMIDINE B                                                            |
| Medtr0110s0050 | 0.869118 | 5'-3' exonuclease family protein                                        |
| Medtr3g087050  | 0.858054 | alpha/beta-Hydrolases superfamily protein                               |
| Medtr7g069970  | 0.854871 | 0                                                                       |
| Medtr3g018790  | 0.852794 | annexin 8                                                               |
| Medtr2g087460  | 0.852581 | Protein of unknown function (DUF3049)                                   |
| Medtr3g082120  | 0.84543  | Leucine-rich repeat (LRR) family protein                                |
| Medtr8g101330  | 0.844234 | acetyl Co-enzyme a carboxylase biotin carboxylase subunit               |
| Medtr7g081805  | 0.843735 | ethylene-responsive element binding factor 13                           |
| Medtr8g063200  | 0.843276 | 0                                                                       |
| Medtr5g035430  | 0.840408 | 0                                                                       |
| Medtr7g111850  | 0.839995 | galactinol synthase 2                                                   |
| Medtr0161s0050 | 0.839688 | acyl activating enzyme 5                                                |
| Medtr2g040500  | 0.833648 | homology to ABI1                                                        |
| Medtr5g032060  | 0.826304 | Kinase interacting (KIP1-like) family protein                           |
| Medtr7g060460  | 0.82575  | laccase 17                                                              |
| Medtr1g009860  | 0.823686 | Protein kinase superfamily protein                                      |
| Medtr7g013100  | 0.814281 | biotin carboxyl carrier protein 2                                       |
| Medtr1g011640  | 0.813614 | pleiotropic drug resistance 12                                          |
| Medtr8g080230  | 0.811654 | PLAT/LH2 domain-containing lipoxygenase family protein                  |
| Medtr4g083620  | 0.804203 | 0                                                                       |
| Medtr4g073920  | 0.802039 | PLC-like phosphodiesterases superfamily protein                         |
| Medtr7g045370  | 0.80193  | carotenoid cleavage dioxygenase 7                                       |
| Medtr6g009540  | 0.801162 | AAA-ATPase 1                                                            |
| Medtr3g110195  | 0.798974 | carotenoid cleavage dioxygenase 1                                       |
| Medtr6g049260  | 0.790884 | Heavy metal transport/detoxification superfamily protein                |
| Medtr1g106420  | 0.788765 | LOB domain-containing protein 38                                        |
| Medtr4g035650  | 0.787404 | 0                                                                       |
| Medtr7g090230  | 0.784306 | Glutaredoxin family protein                                             |
| Medtr5g094730  | 0.784149 | Copper transport protein family                                         |
| Medtr8g432480  | 0.783724 | BON association protein 2                                               |
| Medtr7g015710  | 0.782924 | PLC-like phosphodiesterases superfamily protein                         |
| Medtr2g084120  | 0.777569 | Protein kinase superfamily protein                                      |
| Medtr4g056520  | 0.772424 | serine carboxypeptidase-like 51                                         |
| Medtr7g103610  | 0.770119 | Thioredoxin superfamily protein                                         |
| Medtr8g098375  | 0.766121 | plasma membrane intrinsic protein 1;4                                   |
| Medtr2g034280  | 0.764467 | RGA-like 2                                                              |
| Medtr2g036440  | 0.760896 | lectin protein kinase family protein                                    |
| Medtr4g023480  | 0.758956 | Metal-dependent phosphohydrolase                                        |

|               |          |                                                            |
|---------------|----------|------------------------------------------------------------|
| Medtr4g107370 | 0.754082 | AAA-ATPase 1                                               |
| Medtr2g105100 | 0.74819  | 3-ketoacyl-acyl carrier protein synthase III               |
| Medtr7g090560 | 0.747471 | 0                                                          |
| Medtr8g095040 | 0.746883 | ammonium transporter 2                                     |
| Medtr4g117660 | 0.744665 | Copper amine oxidase family protein                        |
| Medtr1g090370 | 0.744501 | TGACG motif-binding factor 4                               |
| Medtr3g055130 | 0.744418 | PYR1-like 11                                               |
| Medtr3g479490 | 0.732334 | UDP-glucosyl transferase 85A3                              |
| Medtr2g017810 | 0.722226 | Haloacid dehalogenase-like hydrolase (HAD) superfamily pr  |
| Medtr7g109580 | 0.720358 | RGA-like 2                                                 |
| Medtr4g094220 | 0.718263 | UDP-glucosyl transferase 85A3                              |
| Medtr2g090710 | 0.70517  | HAESA-like 1                                               |
| Medtr3g067510 | 0.702868 | 0                                                          |
| Medtr8g089830 | 0.700574 | 0                                                          |
| Medtr5g026580 | 0.689993 | KAR-UP F-box 1                                             |
| Medtr8g040070 | 0.68564  | Ribosome recycling factor                                  |
| Medtr4g105690 | 0.684936 | Inositol 1,3,4-trisphosphate 5/6-kinase family protein     |
| Medtr7g092600 | 0.683572 | cytochrome P450, family 712, subfamily A, polypeptide 1    |
| Medtr4g109020 | 0.679894 | 0                                                          |
| Medtr1g112940 | 0.679069 | Protein phosphatase 2A regulatory B subunit family protein |
| Medtr2g023890 | 0.678694 | mitogen-activated protein kinase kinase kinase 18          |
| Medtr1g068690 | 0.677484 | glucan synthase-like 12                                    |
| Medtr8g009270 | 0.675399 | 0                                                          |
| Medtr3g073180 | 0.673955 | nitrate reductase 1                                        |
| Medtr1g090090 | 0.671461 | glutathione S-transferase TAU 15                           |
| Medtr1g090920 | 0.670316 | glycosyltransferase family protein 47                      |
| Medtr8g081530 | 0.669828 | 0                                                          |
| Medtr3g055120 | 0.667042 | 0                                                          |
| Medtr1g112750 | 0.664512 | FAD/NAD(P)-binding oxidoreductase family protein           |
| Medtr1g066530 | 0.663156 | 0                                                          |
| Medtr1g028560 | 0.662909 | cytokinin response factor 4                                |
| Medtr3g108520 | 0.662077 | 2-oxoglutarate (2OG) and Fe(II)-dependent oxygenase supe   |
| Medtr6g023600 | 0.659789 | NAD(P)-binding Rossmann-fold superfamily protein           |
| Medtr8g090210 | 0.658046 | Mitochondrial substrate carrier family protein             |
| Medtr4g081180 | 0.657803 | Nucleic acid-binding, OB-fold-like protein                 |
| Medtr1g076310 | 0.645974 | small subunit ribosomal protein 16                         |
| Medtr1g077930 | 0.644201 | alpha/beta-Hydrolases superfamily protein                  |
| Medtr5g007210 | 0.639215 | 0                                                          |
| Medtr5g017550 | 0.638553 | Calcium-binding EF-hand family protein                     |
| Medtr8g061950 | 0.63845  | Glutathione S-transferase family protein                   |
| Medtr6g059650 | 0.637108 | Kunitz family trypsin and protease inhibitor protein       |
| Medtr2g102570 | 0.632199 | gibberellin 3-oxidase 1                                    |
| Medtr5g098020 | 0.630337 | 0                                                          |

|                |          |                                                                |
|----------------|----------|----------------------------------------------------------------|
| Medtr2g072190  | 0.628685 | glyoxalase II 3                                                |
| Medtr8g007125  | 0.626126 | phospholipase A 2A                                             |
| Medtr1g054880  | 0.625278 | Plant invertase/pectin methylesterase inhibitor superfamily    |
| Medtr0050s0240 | 0.617802 | Embryo-specific protein 3, (ATS3)                              |
| Medtr8g056020  | 0.616817 | ankyrin repeat family protein                                  |
| Medtr1g105480  | 0.614453 | thiazole biosynthetic enzyme, chloroplast (ARA6) (THI1) (THI1) |
| Medtr2g009220  | 0.611857 | dicarboxylate transport 2.1                                    |
| Medtr8g008660  | 0.611831 | methyl esterase 10                                             |
| Medtr8g018510  | 0.608084 | lipxygenase 1                                                  |
| Medtr4g108330  | 0.607098 | end binding protein 1B                                         |
| Medtr7g074220  | 0.602059 | 0                                                              |
| Medtr4g092515  | 0.593525 | CAP (Cysteine-rich secretory proteins, Antigen 5, and Patho    |
| Medtr2g031930  | 0.592201 | ent-kaurenoic acid hydroxylase 2                               |
| Medtr2g064405  | 0.591499 | Cation efflux family protein                                   |
| Medtr1g076800  | 0.591297 | Protein of unknown function (DUF1442)                          |
| Medtr1g111140  | 0.591266 | 2-oxoacid dehydrogenases acyltransferase family protein        |
| Medtr2g085370  | 0.589035 | Stigma-specific Stig1 family protein                           |
| Medtr8g045300  | 0.587235 | MLP-like protein 28                                            |

the NM-K condition. "Log2 f.c." columns indicate the 1.5 cutoff log2 fold-change of transcripts in r

| AM+K & AM-K (227) | log2 f.c. AM+K | log2 f.c. AM-K | Annotation                                                | AM+K & AM-K (3) | log2 f.c. AM+K | log2 f.c. AM-K |
|-------------------|----------------|----------------|-----------------------------------------------------------|-----------------|----------------|----------------|
| Medtr1g009240     | inf            | inf            | Leucine-rich                                              | Medtr3g479470   | -1.44193       | -2.8418        |
| Medtr2g038675     | inf            | inf            | Leucine-rich                                              | Medtr2g007880   | -1.06145       | -0.992466      |
| Medtr2g102010     | inf            | inf            | Mitochondria                                              | Medtr0219s0070  | -0.677477      | -1.39489       |
| Medtr1g105130     | inf            | inf            | uclacyanin 1                                              |                 |                |                |
| Medtr3g047190     | inf            | inf            | 0                                                         |                 |                |                |
| Medtr3g049390     | inf            | inf            | proline-rich family protein                               |                 |                |                |
| Medtr3g063240     | inf            | inf            | nodulin MtN21 /EamA-like transporter family protein       |                 |                |                |
| Medtr3g107650     | inf            | inf            | RING/U-box superfamily protein with ARM repeat doma       |                 |                |                |
| Medtr4g049550     | inf            | inf            | Disease resistance-responsive (dirigent-like protein) fam |                 |                |                |
| Medtr4g091010     | inf            | inf            | 0                                                         |                 |                |                |
| Medtr4g091000     | inf            | inf            | 0                                                         |                 |                |                |
| Medtr4g091020     | inf            | inf            | 0                                                         |                 |                |                |
| Medtr4g104020     | inf            | inf            | RGA-like 1                                                |                 |                |                |
| Medtr4g116620     | inf            | inf            | 0                                                         |                 |                |                |
| Medtr5g081780     | inf            | inf            | Polyketide cyclase/dehydrase and lipid transport superfi  |                 |                |                |
| Medtr5g005950     | inf            | inf            | Late embryogenesis abundant (LEA) hydroxyproline-rich     |                 |                |                |
| Medtr5g068140     | inf            | inf            | phosphate transporter 1;3                                 |                 |                |                |
| Medtr6g073040     | inf            | inf            | Uncharacterised protein family (UPF0497)                  |                 |                |                |
| Medtr1g014150     | inf            | inf            | Protein of unknown function (DUF567)                      |                 |                |                |
| Medtr7g057900     | inf            | inf            | 0                                                         |                 |                |                |
| Medtr7g076770     | inf            | inf            | 0                                                         |                 |                |                |
| Medtr7g093330     | inf            | inf            | Cysteine/Histidine-rich C1 domain family protein          |                 |                |                |
| Medtr7g077010     | inf            | inf            | 0                                                         |                 |                |                |
| Medtr7g086230     | inf            | inf            | uclacyanin 1                                              |                 |                |                |
| Medtr7g086280     | inf            | inf            | Cupredoxin superfamily protein                            |                 |                |                |
| Medtr7g089730     | inf            | inf            | F-box family protein                                      |                 |                |                |
| Medtr7g102870     | inf            | inf            | Protein of unknown function (DUF1624)                     |                 |                |                |
| Medtr8g012865     | inf            | inf            | Arabidopsis defensin-like protein                         |                 |                |                |
| Medtr8g040940     | inf            | inf            | 0                                                         |                 |                |                |
| Medtr8g068040     | inf            | inf            | Concanavalin A-like lectin protein kinase family protein  |                 |                |                |
| Medtr8g074580     | inf            | inf            | GDSL-like Lipase/Acylhydrolase superfamily protein        |                 |                |                |
| Medtr8g035880     | inf            | inf            | Oxidoreductase, zinc-binding dehydrogenase family proi    |                 |                |                |
| Medtr0027s0260    | inf            | inf            | chitinase A                                               |                 |                |                |
| Medtr0084s0030    | inf            | inf            | Kunitz family trypsin and protease inhibitor protein      |                 |                |                |
| Medtr0147s0050    | inf            | inf            | 0                                                         |                 |                |                |



|               |         |         |                                                            |
|---------------|---------|---------|------------------------------------------------------------|
| Medtr2g460730 | inf     | inf     | ARIA-interacting double AP2 domain protein                 |
| Medtr2g075830 | inf     | inf     | senescence-associated gene 12                              |
| Medtr2g086640 | inf     | inf     | germin-like protein 5                                      |
| Medtr8g068030 | 10.1108 | 8.58078 | Concanavalin A-like lectin protein kinase family protein   |
| Medtr8g031150 | 10.0788 | 7.2638  | 0                                                          |
| Medtr5g075520 | 10.003  | 7.87582 | 0                                                          |
| Medtr4g077180 | 9.95087 | 7.94979 | Bifunctional inhibitor/lipid-transfer protein/seed storage |
| Medtr7g068600 | 9.90378 | 7.67816 | myb-like HTH transcriptional regulator family protein      |
| Medtr5g031090 | 9.89226 | 7.98638 | Concanavalin A-like lectin protein kinase family protein   |
| Medtr4g052770 | 9.84962 | 8.13728 | germin-like protein 5                                      |
| Medtr3g079570 | 9.79405 | 8.15294 | serine carboxypeptidase-like 40                            |
| Medtr1g028600 | 9.74879 | 7.79855 | phosphate transporter 1;1                                  |
| Medtr3g107810 | 9.74627 | 7.83577 | 0                                                          |
| Medtr5g031160 | 9.71758 | 8.0359  | Concanavalin A-like lectin protein kinase family protein   |
| Medtr5g035640 | 9.64668 | 7.66238 | 0                                                          |
| Medtr5g076900 | 9.61267 | 7.80558 | glutathione S-transferase TAU 19                           |
| Medtr8g012835 | 9.14895 | 7.33216 | Arabidopsis defensin-like protein                          |
| Medtr3g081140 | 9.04025 | 7.20519 | 0                                                          |
| Medtr8g059790 | 8.96675 | 7.08113 | Kunitz family trypsin and protease inhibitor protein       |
| Medtr3g009880 | 8.90808 | 7.30858 | FAD-binding Berberine family protein                       |
| Medtr3g088965 | 8.70249 | 6.81701 | 0                                                          |
| Medtr7g066070 | 8.4305  | 6.29007 | Ctr copper transporter family                              |
| Medtr2g091215 | 7.96527 | 5.89057 | Protein of unknown function, DUF538                        |
| Medtr8g071050 | 7.8541  | 6.40503 | 0                                                          |
| Medtr8g068530 | 7.7909  | 5.95475 | U-box domain-containing protein kinase family protein      |
| Medtr2g017750 | 7.77394 | 6.03243 | nitrate transporter 1:2                                    |
| Medtr7g086160 | 7.50311 | 5.81325 | uclacyanin 1                                               |
| Medtr2g030855 | 7.48879 | 6.13163 | RmLC-like cupins superfamily protein                       |
| Medtr1g109110 | 7.45121 | 5.50383 | fatty acyl-ACP thioesterases B                             |
| Medtr8g055940 | 7.29507 | 5.25095 | chitinase A                                                |
| Medtr7g102460 | 7.17417 | 5.44485 | UDP-glucosyl transferase 73C1                              |
| Medtr8g091690 | 7.13991 | 5.30092 | Cytochrome P450 superfamily protein                        |
| Medtr1g040500 | 6.7579  | 4.7861  | glycerol-3-phosphate acyltransferase 6                     |
| Medtr3g078623 | 6.58582 | 5.05771 | formin 8                                                   |
| Medtr3g079630 | 6.57553 | 4.97153 | serine carboxypeptidase-like 40                            |
| Medtr1g079120 | 6.44041 | 4.91118 | Subtilisin-like serine endopeptidase family protein        |
| Medtr3g104900 | 5.98034 | 4.58532 | ACT-like protein tyrosine kinase family protein            |
| Medtr7g070810 | 5.92936 | 4.73813 | UDP-glucosyl transferase 73B3                              |
| Medtr7g070800 | 5.92564 | 4.2032  | UDP-glucosyl transferase 73B3                              |
| Medtr3g086430 | 5.91001 | 4.3382  | ABC transporter family protein                             |
| Medtr2g016730 | 5.8366  | 4.11461 | related to AP2 11                                          |
| Medtr2g081600 | 5.7747  | 4.31748 | nuclear factor Y, subunit C1                               |
| Medtr8g103227 | 5.62093 | 3.93355 | Transducin/WD40 repeat-like superfamily protein            |

|               |         |         |                                                           |
|---------------|---------|---------|-----------------------------------------------------------|
| Medtr2g070120 | 5.49876 | 3.69924 | glutathione S-transferase TAU 20                          |
| Medtr6g013440 | 5.42399 | 3.77708 | UDP-glucosyl transferase 85A3                             |
| Medtr4g011120 | 5.4026  | 3.96259 | RNI-like superfamily protein                              |
| Medtr2g104800 | 5.32724 | 3.68237 | 0                                                         |
| Medtr6g043700 | 5.32645 | 3.23366 | 0                                                         |
| Medtr3g107830 | 5.17015 | 3.64293 | unknown seed protein like 1                               |
| Medtr3g118160 | 5.15989 | 3.4468  | ATPase family associated with various cellular activities |
| Medtr4g108170 | 5.14167 | 3.38825 | ABC2 homolog 6                                            |
| Medtr6g056070 | 5.12898 | 3.57363 | S-adenosyl-L-methionine-dependent methyltransferases      |
| Medtr2g072260 | 5.10953 | 3.32694 | cytochrome P450, family 72, subfamily A, polypeptide 1    |
| Medtr3g058000 | 5.09948 | 3.11129 | cytochrome P450, family 71, subfamily B, polypeptide 3    |
| Medtr3g022830 | 5.0438  | 2.88628 | scarecrow-like 3                                          |
| Medtr7g028810 | 5.00895 | 3.31609 | 0                                                         |
| Medtr1g075550 | 4.93284 | 3.50868 | PLAC8 family protein                                      |
| Medtr7g076920 | 4.81469 | 3.12559 | 0                                                         |
| Medtr7g077050 | 4.80983 | 3.28987 | 0                                                         |
| Medtr8g091720 | 4.79743 | 3.65435 | nuclear factor Y, subunit B3                              |
| Medtr8g107450 | 4.6958  | 3.00271 | ABC-2 type transporter family protein                     |
| Medtr5g018610 | 4.67935 | 2.95027 | 0                                                         |
| Medtr1g101370 | 4.66365 | 3.16515 | S-adenosyl-L-methionine-dependent methyltransferases      |
| Medtr3g057980 | 4.63469 | 3.05595 | cytochrome P450, family 71, subfamily B, polypeptide 3    |
| Medtr2g031270 | 4.5162  | 3.44398 | RmlC-like cupins superfamily protein                      |
| Medtr4g114320 | 4.42994 | 2.43803 | Mitochondrial substrate carrier family protein            |
| Medtr7g070870 | 4.42682 | 2.84207 | UDP-glucosyl transferase 73B3                             |
| Medtr6g013450 | 4.29566 | 2.92507 | UDP-Glycosyltransferase superfamily protein               |
| Medtr7g098040 | 4.22994 | 2.8307  | peptide transporter 3                                     |
| Medtr3g467150 | 4.18382 | 2.76572 | extra-large GTP-binding protein 2                         |
| Medtr5g030910 | 3.9312  | 2.7626  | ABC-2 type transporter family protein                     |
| Medtr8g103233 | 3.89145 | 2.41281 | Major facilitator superfamily protein                     |
| Medtr8g069775 | 3.86943 | 2.1843  | nitrate transporter2.5                                    |
| Medtr1g017910 | 3.86903 | 2.05475 | exocyst subunit exo70 family protein G1                   |
| Medtr2g044100 | 3.85737 | 1.95534 | GDSL-motif lipase 5                                       |
| Medtr4g094515 | 3.8533  | 2.37902 | FAD-binding Berberine family protein                      |
| Medtr4g104750 | 3.80527 | 2.58225 | 0                                                         |
| Medtr6g012980 | 3.76006 | 2.03377 | SNF1 kinase homolog 10                                    |
| Medtr3g014500 | 3.72493 | 2.32737 | NB-ARC domain-containing disease resistance protein       |
| Medtr1g098300 | 3.69379 | 2.23812 | Protein kinase superfamily protein                        |
| Medtr1g050525 | 3.68414 | 2.56805 | pleiotropic drug resistance 6                             |
| Medtr4g126930 | 3.64438 | 2.26777 | Leucine-rich repeat transmembrane protein kinase          |
| Medtr6g079630 | 3.64362 | 1.81749 | 0                                                         |
| Medtr4g102400 | 3.63102 | 2.62942 | Subtilase family protein                                  |
| Medtr5g086080 | 3.62213 | 2.40431 | chitin elicitor receptor kinase 1                         |
| Medtr8g036050 | 3.49403 | 2.02957 | dihydrodipicolinate synthase                              |

|                |         |          |                                                                         |
|----------------|---------|----------|-------------------------------------------------------------------------|
| Medtr1g069725  | 3.44487 | 2.16993  | GRAS family transcription factor                                        |
| Medtr3g011630  | 3.37247 | 1.52436  | Protein kinase superfamily protein                                      |
| Medtr2g023150  | 3.34479 | 1.93666  | Leucine-rich repeat protein kinase family protein                       |
| Medtr6g462640  | 3.33597 | 1.8266   | cytochrome P450, family 71, subfamily B, polypeptide 3                  |
| Medtr7g094760  | 3.31565 | 2.1286   | Receptor-like protein kinase-related family protein                     |
| Medtr2g062430  | 3.30998 | 1.62343  | Plant protein of unknown function (DUF946)                              |
| Medtr7g092620  | 3.23024 | 2.12915  | cytochrome P450, family 93, subfamily D, polypeptide 1                  |
| Medtr4g064025  | 3.22236 | 1.50756  | 3-oxo-5-alpha-steroid 4-dehydrogenase family protein                    |
| Medtr3g093270  | 3.14777 | 1.73521  | Major facilitator superfamily protein                                   |
| Medtr3g021440  | 3.11653 | 1.68429  | O-methyltransferase 1                                                   |
| Medtr7g111740  | 3.10093 | 1.75731  | Glycosyl hydrolase superfamily protein                                  |
| Medtr8g033380  | 3.0976  | 1.64382  | gibberellin 20 oxidase 2                                                |
| Medtr3g020880  | 3.05807 | 1.61313  | 0                                                                       |
| Medtr2g012790  | 2.97972 | 1.55223  | Galactose oxidase/kelch repeat superfamily protein                      |
| Medtr8g065720  | 2.96682 | 2.20881  | Thioredoxin superfamily protein                                         |
| Medtr8g107250  | 2.94882 | 1.85375  | beta-6 tubulin                                                          |
| Medtr2g062560  | 2.94868 | 1.77021  | beta-hexosaminidase 2                                                   |
| Medtr6g012970  | 2.87496 | 1.81994  | related to AP2 11                                                       |
| Medtr3g111900  | 2.80885 | 1.58568  | AMP-dependent synthetase and ligase family protein                      |
| Medtr1g116000  | 2.80639 | 1.5937   | 0                                                                       |
| Medtr1g009270  | 2.80408 | 1.46564  | Leucine-rich repeat protein kinase family protein                       |
| Medtr5g010590  | 2.79987 | 1.50661  | Remorin family protein                                                  |
| Medtr7g105570  | 2.76498 | 1.47482  | NAD(P)-binding Rossmann-fold superfamily protein                        |
| Medtr4g053630  | 2.7207  | 1.87912  | Subtilisin-like serine endopeptidase family protein                     |
| Medtr7g082660  | 2.71463 | 1.09716  | Plant protein of unknown function (DUF827)                              |
| Medtr4g117750  | 2.70785 | 1.71201  | F-box family protein                                                    |
| Medtr1g080820  | 2.70413 | 2.19724  | pathogenesis-related 4                                                  |
| Medtr3g058250  | 2.61534 | 1.0571   | cytochrome P450, family 71, subfamily B, polypeptide 3                  |
| Medtr5g083030  | 2.58327 | 1.72934  | plant U-box 13                                                          |
| Medtr4g130270  | 2.57523 | 1.51934  | ARIA-interacting double AP2 domain protein                              |
| Medtr8g093070  | 2.43348 | 2.05007  | GRAS family transcription factor                                        |
| Medtr8g064840  | 2.41823 | 1.23208  | DC1 domain-containing protein                                           |
| Medtr7g080950  | 2.40263 | 0.916511 | UDP-Glycosyltransferase superfamily protein                             |
| Medtr0021s0370 | 2.39766 | 1.11343  | 2-oxoglutarate (2OG) and Fe(II)-dependent oxygenase superfamily protein |
| Medtr8g089190  | 2.39631 | 1.25035  | cytochrome P450, family 716, subfamily A, polypeptide 1                 |
| Medtr8g068265  | 2.35878 | 1.49506  | Deoxyxylulose-5-phosphate synthase                                      |
| Medtr7g117280  | 2.3437  | 1.04561  | alpha/beta-Hydrolases superfamily protein                               |
| Medtr7g112963  | 2.33832 | 0.945749 | alpha/beta-Hydrolases superfamily protein                               |
| Medtr2g437880  | 2.32914 | 1.9589   | cytochrome P450, family 81, subfamily D, polypeptide 8                  |
| Medtr8g068050  | 2.27992 | 1.05991  | Concanavalin A-like lectin protein kinase family protein                |
| Medtr2g089100  | 2.27845 | 0.967669 | GRAS family transcription factor                                        |
| Medtr1g050550  | 2.2765  | 0.773947 | Major facilitator superfamily protein                                   |
| Medtr6g027840  | 2.27226 | 1.2458   | protein kinases;ubiquitin-protein ligases                               |

|                |         |          |                                                             |
|----------------|---------|----------|-------------------------------------------------------------|
| Medtr3g099740  | 2.25771 | 0.901964 | purine permease 3                                           |
| Medtr3g434790  | 2.2478  | 1.69447  | P-loop containing nucleoside triphosphate hydrolases su     |
| Medtr7g102490  | 2.19228 | 1.62283  | UDP-glucosyl transferase 73C1                               |
| Medtr4g116610  | 2.18414 | 0.890161 | 0                                                           |
| Medtr8g038220  | 2.10932 | 0.849897 | annexin 8                                                   |
| Medtr1g110290  | 2.08818 | 1.03819  | Core-2/I-branching beta-1,6-N-acetylglucosaminyltransf      |
| Medtr1g086550  | 2.07411 | 1.07163  | gibberellin 2-oxidase 6                                     |
| Medtr4g090600  | 2.03391 | 0.950521 | sugar transporter 1                                         |
| Medtr5g026730  | 1.98693 | 1.36729  | RING/U-box superfamily protein                              |
| Medtr3g082200  | 1.98329 | 1.07165  | Subtilisin-like serine endopeptidase family protein         |
| Medtr4g129010  | 1.98026 | 1.23786  | Protein kinase superfamily protein                          |
| Medtr6g082180  | 1.96124 | 1.37846  | Heavy metal transport/detoxification superfamily protei     |
| Medtr0045s0060 | 1.93677 | 1.61664  | cytochrome P450, family 88, subfamily A, polypeptide 3      |
| Medtr1g115195  | 1.91744 | 0.836408 | glutathione S-transferase tau 7                             |
| Medtr1g021638  | 1.91589 | 1.2106   | cysteine-rich RLK (RECEPTOR-like protein kinase) 26         |
| Medtr7g080180  | 1.85823 | 0.795251 | serine carboxypeptidase-like 20                             |
| Medtr6g015950  | 1.83682 | 0.808768 | 2-oxoglutarate (2OG) and Fe(II)-dependent oxygenase si      |
| Medtr5g064990  | 1.83232 | 0.711909 | RING/U-box superfamily protein                              |
| Medtr7g112440  | 1.82653 | 1.39622  | Protein kinase family protein                               |
| Medtr0083s0100 | 1.81379 | 1.01663  | 0                                                           |
| Medtr7g090520  | 1.81028 | 0.659839 | 2-oxoglutarate (2OG) and Fe(II)-dependent oxygenase si      |
| Medtr4g127140  | 1.80762 | 1.04116  | AGAMOUS-like 62                                             |
| Medtr7g093030  | 1.79458 | 1.43658  | myb-like HTH transcriptional regulator family protein       |
| Medtr3g020970  | 1.78424 | 0.719874 | Serine protease inhibitor, potato inhibitor I-type family p |
| Medtr3g072710  | 1.76838 | 1.17385  | GRAS family transcription factor                            |
| Medtr1g102070  | 1.76044 | 0.82218  | gibberellin 20 oxidase 2                                    |
| Medtr6g029180  | 1.75275 | 0.99537  | related to AP2 11                                           |
| Medtr5g044220  | 1.75027 | 0.746246 | Glucose-6-phosphate/phosphate translocator-related          |
| Medtr2g461970  | 1.74486 | 0.999925 | reversibly glycosylated polypeptide 1                       |
| Medtr8g038210  | 1.70413 | 0.638672 | annexin 8                                                   |
| Medtr0188s0020 | 1.64446 | 1.34987  | purple acid phosphatase 10                                  |
| Medtr4g080700  | 1.64128 | 1.37084  | senescence-associated gene 12                               |
| Medtr4g478140  | 1.59487 | 0.635016 | MLP-like protein 423                                        |
| Medtr8g045555  | 1.58689 | 1.97988  | MLP-like protein 43                                         |
| Medtr1g061540  | 1.56445 | 1.28653  | Protein of unknown function (DUF668)                        |
| Medtr2g099110  | 1.48094 | 0.824637 | GRAS family transcription factor                            |
| Medtr3g109610  | 1.48068 | 0.724219 | carotenoid cleavage dioxygenase 8                           |
| Medtr5g023170  | 1.4709  | 1.6852   | Rhodanese/Cell cycle control phosphatase superfamily p      |
| Medtr7g062580  | 1.46805 | 0.657223 | 2-oxoglutarate (2OG) and Fe(II)-dependent oxygenase si      |
| Medtr2g090240  | 1.4457  | 0.801234 | alpha/beta-Hydrolases superfamily protein                   |
| Medtr8g046240  | 1.37264 | 0.947224 | cytochrome P450, family 76, subfamily C, polypeptide 6      |
| Medtr6g012960  | 1.36992 | 0.992801 | 0                                                           |
| Medtr6g086560  | 1.33959 | 0.625249 | alpha/beta-Hydrolases superfamily protein                   |

|               |          |          |                                                         |
|---------------|----------|----------|---------------------------------------------------------|
| Medtr1g070135 | 1.33239  | 0.643657 | 2-oxoglutarate (2OG) and Fe(II)-dependent oxygenase si  |
| Medtr7g063800 | 1.29921  | 1.03156  | carotenoid cleavage dioxygenase 8                       |
| Medtr4g102280 | 1.29027  | 0.787888 | cytochrome P450, family 706, subfamily A, polypeptide   |
| Medtr4g133890 | 1.28948  | 0.742994 | microtubule-associated proteins 70-5                    |
| Medtr3g106430 | 1.09134  | 0.800882 | SPFH/Band 7/PHB domain-containing membrane-associ       |
| Medtr4g097220 | 0.983834 | 0.870434 | 0                                                       |
| Medtr2g105360 | 0.94618  | 0.64932  | GA requiring 3                                          |
| Medtr5g030310 | 0.939335 | 0.816111 | 0                                                       |
| Medtr7g075040 | 0.874958 | 0.888155 | EF hand calcium-binding protein family                  |
| Medtr5g026640 | 0.865377 | 0.700426 | solute:sodium symporters;urea transmembrane transpc     |
| Medtr3g067437 | 0.853719 | 1.27221  | 0                                                       |
| Medtr4g057450 | 0.840207 | 0.721659 | xyloglucan endotransglucosylase/hydrolase 32            |
| Medtr7g082180 | 0.837387 | 0.688643 | 0                                                       |
| Medtr2g026420 | 0.81162  | 0.997231 | 0                                                       |
| Medtr2g010530 | 0.801438 | 1.01273  | cytochrome P450, family 71, subfamily B, polypeptide 3! |
| Medtr5g090830 | 0.799878 | 0.659976 | HXXXD-type acyl-transferase family protein              |
| Medtr1g111510 | 0.743993 | 0.739662 | Major facilitator superfamily protein                   |
| Medtr2g045490 | 0.722615 | 0.7775   | pyruvate dehydrogenase kinase                           |
| Medtr8g041650 | 0.711831 | 0.647726 | cysteine-rich RLK (RECEPTOR-like protein kinase) 10     |
| Medtr6g092660 | 0.691818 | 0.961607 | cytidine deaminase 1                                    |

family protein

/

114)

genesis-related 1 protein) superfamily protein

response to the control condition NM+K. Inf indicates that no transcript was found expressed in the NI

|               | Annotation   | AM-K (246)    | log2 f.c. AM-K | Annotation     | AM-K (265)    | log2 f.c. AM-K | Annotation     |
|---------------|--------------|---------------|----------------|----------------|---------------|----------------|----------------|
|               | UDP-Glycosyl | Medtr5g011340 | 8.4835         | Subtilase fam  | Medtr8g091320 | -4.55672       | myo-inositol-  |
|               | HXXXD-type a | Medtr1g090737 | 6.855          | OPC-8:0 CoA    | Medtr6g465030 | -2.54719       | 0              |
|               | alpha carbon | Medtr1g090707 | 6.31504        | SKU5 similar   | Medtr7g062250 | -2.5197        | laccase 17     |
|               |              | Medtr2g063560 | 2.86477        | HSP20-like ch  | Medtr6g039440 | -2.35304       | terpene synt   |
|               |              | Medtr1g087200 | 2.64534        | Adenine nucl   | Medtr1g046070 | -2.34444       | 0              |
|               |              | Medtr4g011230 | 2.4046         | Late embryo    | Medtr2g095800 | -2.27528       | xyloglucan er  |
|               |              | Medtr3g466980 | 2.27527        | AGAMOUS-li     | Medtr3g034640 | -2.22218       | 0              |
| in            |              | Medtr8g042900 | 2.14694        | root hair spe  | Medtr1g075230 | -2.21875       | 0              |
| ily protein   |              | Medtr4g029190 | 2.10615        | Peroxidase su  | Medtr3g063140 | -2.11081       | terpene synt   |
|               |              | Medtr3g088845 | 2.02649        | Thiamin diph   | Medtr7g013710 | -2.01884       | 0              |
|               |              | Medtr7g108250 | 1.97414        | Thioredoxin s  | Medtr8g045735 | -1.97078       | Polyketide cy  |
|               |              | Medtr6g088320 | 1.87461        | xyloglucan er  | Medtr1g054935 | -1.96152       | ABC-2 type tr  |
|               |              | Medtr5g025800 | 1.75596        | 0              | Medtr1g074070 | -1.92178       | nodulin MtN:   |
|               |              | Medtr7g092090 | 1.73762        | 0              | Medtr1g035360 | -1.91774       | Cyclophilin-li |
| amily protein |              | Medtr1g083440 | 1.72544        | Dormancy/au    | Medtr5g094550 | -1.90643       | cytochrome f   |
| glycoprotein  |              | Medtr4g102450 | 1.69244        | expansin A7    | Medtr7g085150 | -1.89869       | apyrase 2      |
|               |              | Medtr1g023700 | 1.68266        | cytochrome f   | Medtr7g057330 | -1.88482       | F-box family   |
|               |              | Medtr3g085020 | 1.65014        | Protein of un  | Medtr3g466200 | -1.86661       | Peroxidase su  |
|               |              | Medtr7g101270 | 1.64898        | 0              | Medtr1g062500 | -1.79829       | Phenazine bi   |
|               |              | Medtr6g084640 | 1.6426         | cold-regulate  | Medtr3g465090 | -1.7701        | terpene synt   |
|               |              | Medtr1g098760 | 1.6257         | 0              | Medtr5g094540 | -1.6958        | cytochrome f   |
|               |              | Medtr4g099010 | 1.61548        | Plant inverta  | Medtr7g081410 | -1.68538       | Leucine-rich   |
|               |              | Medtr7g109920 | 1.60318        | galactinol syr | Medtr7g090590 | -1.64305       | Gibberellin-re |
|               |              | Medtr3g102970 | 1.56649        | 0              | Medtr8g020560 | -1.61822       | growth-regul   |
|               |              | Medtr1g110870 | 1.55694        | B-box type zi  | Medtr4g078535 | -1.5837        | Leucine-rich   |
|               |              | Medtr4g055170 | 1.55133        | HXXXD-type a   | Medtr4g085790 | -1.46949       | 0              |
|               |              | Medtr4g063940 | 1.54197        | protein kinas  | Medtr6g021950 | -1.45855       | Pectin lyase-l |
|               |              | Medtr2g437770 | 1.53209        | Peroxidase su  | Medtr4g059840 | -1.44364       | FASCICLIN-lik  |
|               |              | Medtr5g009370 | 1.5162         | highly ABA-in  | Medtr5g094560 | -1.42983       | cytochrome f   |
|               |              | Medtr2g070200 | 1.4356         | glutathione S  | Medtr2g069300 | -1.42874       | 2-oxoglutarat  |
|               |              | Medtr4g092640 | 1.43541        | FAD/NAD(P)-    | Medtr3g112120 | -1.38594       | cytochrome f   |
| tein          |              | Medtr8g022990 | 1.41773        | 0              | Medtr4g069810 | -1.38534       | 0              |
|               |              | Medtr1g066380 | 1.39955        | Peroxidase su  | Medtr2g062280 | -1.36673       | 0              |
|               |              | Medtr1g104555 | 1.38581        | receptor-like  | Medtr8g018170 | -1.35676       | disease resist |
|               |              | Medtr7g068650 | 1.36576        | 2-oxoglutarat  | Medtr1g018200 | -1.33782       | beta-galactos  |

α 2S albumin s

|                |          |                |                |          |                |
|----------------|----------|----------------|----------------|----------|----------------|
| Medtr1g013100  | 1.36453  | Plant protein  | Medtr6g047900  | -1.33325 | 0              |
| Medtr7g427690  | 1.33698  | homeodoma      | Medtr3g034030  | -1.32685 | Disease resist |
| Medtr8g102430  | 1.31383  | MATE efflux    | Medtr1g112210  | -1.32185 | TRICHOME B     |
| Medtr8g015250  | 1.28897  | basic leucine  | Medtr7g091830  | -1.30318 | 0              |
| Medtr1173s0010 | 1.2542   | Heavy metal    | Medtr1g069935  | -1.29601 | phosphate tr   |
| Medtr1g026070  | 1.24492  | RING/U-box s   | Medtr7g070390  | -1.28494 | Disease resist |
| Medtr8g028600  | 1.23866  | ACC synthase   | Medtr8g020990  | -1.26824 | lipoxygenase   |
| Medtr4g029200  | 1.23275  | Peroxidase su  | Medtr2g040740  | -1.26074 | chitinase A    |
| Medtr6g042660  | 1.21151  | Pectin lyase-l | Medtr2g090265  | -1.25113 | expansin B3    |
| Medtr4g133800  | 1.1934   | Peroxidase su  | Medtr5g094570  | -1.23915 | cytochrome f   |
| Medtr5g090740  | 1.18953  | 0              | Medtr6g078070  | -1.22699 | Kunitz family  |
| Medtr2g079990  | 1.18743  | NAC (No Apic   | Medtr7g021130  | -1.2269  | serine carbox  |
| Medtr4g084480  | 1.16374  | Glycosyl hydr  | Medtr8g446430  | -1.21323 | potassium ch   |
| Medtr2g017570  | 1.16366  | NOD26-like in  | Medtr3g109030  | -1.2089  | cyclic nucleot |
| Medtr7g085220  | 1.15453  | NAC domain     | Medtr8g016370  | -1.20026 | Late embryog   |
| Medtr7g028780  | 1.1517   | 0              | Medtr5g074680  | -1.19977 | O-methyltran   |
| Medtr8g066860  | 1.12649  | 0              | Medtr4g066380  | -1.19872 | basic helix-lo |
| Medtr4g063945  | 1.10994  | Protein kinas  | Medtr2g102450  | -1.19045 | AP2/B3-like t  |
| Medtr4g066240  | 1.10922  | beta glucosid  | Medtr5g091050  | -1.18969 | hydroxy metl   |
| Medtr5g090250  | 1.10372  | Serine protea  | Medtr4g087890  | -1.18454 | formin homo    |
| Medtr3g106420  | 1.09648  | SPFH/Band 7    | Medtr6g088810  | -1.18304 | Pectin lyase-l |
| Medtr4g132010  | 1.07489  | 0              | Medtr8g085390  | -1.17792 | Carbohydrate   |
| Medtr4g017050  | 1.07476  | RmlC-like cup  | Medtr6g012730  | -1.16197 | Pyridoxal pho  |
| Medtr2g030100  | 1.07042  | Plant self-inc | Medtr6g017150  | -1.15611 | 0              |
| Medtr8g059170  | 1.06036  | NAC (No Apic   | Medtr2g032710  | -1.15379 | Pectin lyase-l |
| Medtr3g101960  | 1.05792  | HXXXD-type a   | Medtr4g109140  | -1.14977 | Protein of un  |
| Medtr7g112560  | 1.05244  | phloem prote   | Medtr1g057560  | -1.14561 | exocyst subu   |
| Medtr3g096400  | 1.04259  | xylem NAC d    | Medtr4g079760  | -1.12247 | basic helix-lo |
| Medtr2g080010  | 1.03573  | NAC domain     | Medtr8g086600  | -1.11838 | cellulose synt |
| Medtr4g039540  | 1.032    | 0              | Medtr3g099580  | -1.11399 | Cupredoxin s   |
| Medtr1g077890  | 1.01764  | methionine g   | Medtr4g094212  | -1.11252 | tobamovirus    |
| Medtr2g068880  | 1.01085  | NAC domain     | Medtr2g462000  | -1.10633 | COBRA-like e   |
| Medtr8g026960  | 1.01068  | homeobox 7     | Medtr2g102730  | -1.10082 | Phototropic-r  |
| Medtr8g019370  | 1.00329  | 0              | Medtr4g065370  | -1.10082 | Integrase-typ  |
| Medtr8g023790  | 1.00052  | photosystem    | Medtr7g092580  | -1.09743 | 0              |
| Medtr5g083500  | 1.0002   | 0              | Medtr2g043900  | -1.09145 | Riboflavin sy  |
| Medtr3g106480  | 0.99898  | SPFH/Band 7    | Medtr0011s0020 | -1.0787  | cellulose synt |
| Medtr3g071470  | 0.998387 | Pollen Ole e   | Medtr4g027800  | -1.07801 | lipid transfer |
| Medtr2g034350  | 0.997015 | 0              | Medtr2g018990  | -1.06881 | Protein kinas  |
| Medtr3g092400  | 0.996036 | 0              | Medtr7g417750  | -1.05184 | allene oxide c |
| Medtr5g016410  | 0.995309 | cytochrome f   | Medtr6g044780  | -1.03997 | Kunitz family  |
| Medtr3g114530  | 0.99111  | DC1 domain-    | Medtr3g091620  | -1.03985 | RING/U-box s   |
| Medtr4g094550  | 0.990909 | 0              | Medtr4g023550  | -1.03036 | 0              |



|               |                |          |                |               |           |                |
|---------------|----------------|----------|----------------|---------------|-----------|----------------|
|               | Medtr8g432390  | 0.986459 | BON associat   | Medtr1g071450 | -1.02267  | Plant protein  |
|               | Medtr5g091060  | 0.985974 | phytoene des   | Medtr1g044130 | -1.01123  | Ribosomal pr   |
|               | Medtr1g081840  | 0.982386 | gibberellin 20 | Medtr2g093980 | -0.992054 | FASCICLIN-lik  |
|               | Medtr5g020060  | 0.981838 | 0              | Medtr2g072270 | -0.977147 | cytochrome f   |
|               | Medtr4g076255  | 0.979052 | Glycosyl hydr  | Medtr3g115120 | -0.976342 | Protein of un  |
|               | Medtr4g128410  | 0.978643 | xyloglucan er  | Medtr3g087740 | -0.972965 | slufate transp |
| (AAA)         | Medtr4g094302  | 0.976509 | xylem NAC do   | Medtr1g075180 | -0.963947 | 0              |
|               | Medtr4g134290  | 0.962912 | phosphofruct   | Medtr1g101120 | -0.961244 | PAR1 protein   |
| s superfamily | Medtr3g091350  | 0.960239 | 2-oxoglutarat  | Medtr3g106290 | -0.949811 | Integrase-typ  |
| 5             | Medtr3g078160  | 0.959655 | plant U-box 1  | Medtr6g047880 | -0.945563 | 0              |
| 5             | Medtr3g460790  | 0.959422 | nudix hydroly  | Medtr8g065010 | -0.944741 | Pectin lyase-l |
|               | Medtr1g069805  | 0.95086  | NAC domain     | Medtr4g132840 | -0.943695 | EPS15 homol    |
|               | Medtr4g094340  | 0.950644 | nodulin MtN    | Medtr8g102800 | -0.936551 | Integrase-typ  |
|               | Medtr1g035690  | 0.944121 | glutaredoxin-  | Medtr1g026740 | -0.936368 | Major facilita |
|               | Medtr8g096320  | 0.940383 | Nodulin MtN    | Medtr5g078215 | -0.934422 | 0              |
|               | Medtr2g104910  | 0.935843 | golgi snare 1  | Medtr4g128770 | -0.931341 | CAP (Cysteine  |
|               | Medtr7g112860  | 0.933067 | Dormancy/au    | Medtr1g084050 | -0.925818 | nicotianamin   |
|               | Medtr6g464320  | 0.932511 | carboxyester   | Medtr5g085850 | -0.917473 | Major facilita |
|               | Medtr3g057800  | 0.92513  | cytochrome f   | Medtr4g011970 | -0.916275 | sulfate transp |
| s superfamily | Medtr5g005850  | 0.923686 | alpha/beta-H   | Medtr8g479390 | -0.915384 | SKU5 similar   |
| 4             | Medtr1g100777  | 0.921951 | heat shock tr  | Medtr4g053380 | -0.913703 | FASCICLIN-lik  |
|               | Medtr8g445170  | 0.921322 | BURP domain    | Medtr3g118010 | -0.909451 | plasma mem     |
|               | Medtr0189s0010 | 0.921183 | mitogen-acti   | Medtr3g071890 | -0.903513 | laccase 12     |
|               | Medtr7g102770  | 0.912956 | Pollen Ole e   | Medtr3g014290 | -0.894466 | Eukaryotic as  |
|               | Medtr7g100100  | 0.891603 | C2H2 and C2    | Medtr5g084260 | -0.892212 | 0              |
|               | Medtr1g019110  | 0.890398 | DREB and EA    | Medtr5g021840 | -0.890387 | 0              |
|               | Medtr3g051530  | 0.886476 | 0              | Medtr3g028740 | -0.887365 | myb domain     |
|               | Medtr1g043350  | 0.88618  | ethylene resp  | Medtr3g070850 | -0.885343 | Double Clp-N   |
|               | Medtr7g099800  | 0.885528 | cation/H+ ex   | Medtr3g116440 | -0.880237 | 0              |
|               | Medtr2g088930  | 0.884781 | Receptor-like  | Medtr4g007740 | -0.878427 | Eukaryotic as  |
|               | Medtr3g435530  | 0.873233 | 0              | Medtr8g087450 | -0.868708 | FASCICLIN-lik  |
|               | Medtr5g011990  | 0.87011  | 0              | Medtr4g065017 | -0.867025 | myb domain     |
|               | Medtr3g103580  | 0.853852 | branched-cha   | Medtr4g132270 | -0.8659   | glyoxalase I h |
|               | Medtr5g066020  | 0.850482 | Predicted AT   | Medtr8g090265 | -0.86166  | 0              |
|               | Medtr0015s0030 | 0.846003 | Concanavalin   | Medtr4g031820 | -0.857034 | cytochrome f   |
|               | Medtr8g432400  | 0.844134 | BON associat   | Medtr8g069925 | -0.853955 | 0              |
|               | Medtr2g035430  | 0.837742 | cationic amin  | Medtr5g004980 | -0.849187 | 0              |
|               | Medtr2g094790  | 0.833894 | Putative lysin | Medtr5g021180 | -0.848342 | thioredoxin H  |
|               | Medtr4g066580  | 0.83046  | beta glucosid  | Medtr2g017980 | -0.84728  | AAA-type ATF   |
|               | Medtr4g087920  | 0.829365 | basic helix-lo | Medtr8g013680 | -0.844861 | delta tonopla  |
|               | Medtr7g017880  | 0.826473 | basic leucine  | Medtr3g075320 | -0.831328 | Pectate lyase  |
|               | Medtr7g108650  | 0.822572 | TSPO(outer n   | Medtr5g009660 | -0.831198 | Leucine-rich r |
|               | Medtr3g108860  | 0.820863 | Galactose ox   | Medtr2g026760 | -0.828899 | Bifunctional i |

5

5

superfamily pro

1

|               |          |                |                |           |                |
|---------------|----------|----------------|----------------|-----------|----------------|
| Medtr4g012850 | 0.82059  | Mitochondria   | Medtr0246s0020 | -0.818683 | basic helix-lo |
| Medtr1g018320 | 0.814333 | alpha/beta-H   | Medtr1g100787  | -0.813069 | Leucine-rich r |
| Medtr8g069450 | 0.812864 | Tetratricopep  | Medtr1g070220  | -0.794031 | lateral organ  |
| Medtr3g028210 | 0.809017 | HXXXD-type d   | Medtr2g093990  | -0.793381 | FASCICLIN-lik  |
| Medtr4g485550 | 0.808822 | Leucine-rich   | Medtr3g095480  | -0.793112 | 0              |
| Medtr4g115330 | 0.805225 | Raffinose syn  | Medtr5g019220  | -0.789816 | galacturonos   |
| Medtr1g027580 | 0.799808 | wall-associat  | Medtr2g055470  | -0.788493 | cytochrome F   |
| Medtr1g103290 | 0.798259 | homocystein    | Medtr5g040420  | -0.78823  | NAC (No Apic   |
| Medtr4g011020 | 0.797588 | Lactoylglutat  | Medtr7g074935  | -0.786303 | AT-hook moti   |
| Medtr7g115120 | 0.794307 | bZIP transcrip | Medtr3g083620  | -0.785749 | O-methyltran   |
| Medtr2g070870 | 0.788645 | Arabidopsis t  | Medtr4g063130  | -0.782898 | Domain of un   |
| Medtr4g089020 | 0.788211 | cytochrome f   | Medtr5g031880  | -0.782153 | AINTEGUMEN     |
| Medtr1g006695 | 0.78326  | Regulator of   | Medtr1g030630  | -0.775181 | Heavy metal    |
| Medtr6g088525 | 0.782881 | 0              | Medtr8g102400  | -0.775027 | IQ-domain 26   |
| Medtr8g009110 | 0.780313 | 2-oxoglutarat  | Medtr2g081590  | -0.774732 | BURP domain    |
| Medtr4g067040 | 0.780009 | beta glucosid  | Medtr4g105430  | -0.773737 | UBX domain-    |
| Medtr1g098460 | 0.769413 | Integrase-ty   | Medtr6g027920  | -0.768812 | Cobalamin-in   |
| Medtr2g024010 | 0.768866 | Stigma-specif  | Medtr3g076930  | -0.766784 | P-loop contain |
| Medtr1g086510 | 0.766856 | myb domain     | Medtr5g022870  | -0.766369 | Peroxidase su  |
| Medtr2g080280 | 0.765907 | 0              | Medtr1g088885  | -0.764506 | Phototropic-r  |
| Medtr1g013090 | 0.76448  | pre-mRNA sp    | Medtr2g022370  | -0.762521 | Eukaryotic as  |
| Medtr3g070880 | 0.764246 | zinc finger (C | Medtr6g066190  | -0.76051  | Kunitz family  |
| Medtr5g041940 | 0.759543 | NAC-like, act  | Medtr4g050590  | -0.75968  | Protein of un  |
| Medtr3g092150 | 0.758473 | homeobox 7     | Medtr5g022530  | -0.748322 | Protein of un  |
| Medtr8g099065 | 0.756211 | P-loop contain | Medtr3g086090  | -0.746634 | TPX2 (targeti  |
| Medtr2g034720 | 0.753687 | beta-xylosida  | Medtr5g041700  | -0.743239 | expansin A15   |
| Medtr6g027660 | 0.752499 | cationic amin  | Medtr2g017950  | -0.73421  | FASCICLIN-lik  |
| Medtr4g011060 | 0.75021  | 0              | Medtr0006s0240 | -0.730991 | NB-ARC doma    |
| Medtr5g082150 | 0.749788 | ortholog of s  | Medtr2g096900  | -0.730156 | outer plastid  |
| Medtr7g106820 | 0.749426 | 0              | Medtr7g011060  | -0.728681 | expansin A15   |
| Medtr1g083580 | 0.749033 | phloem prote   | Medtr8g098360  | -0.727753 | beta-6 tubulin |
| Medtr2g435690 | 0.747553 | 0              | Medtr2g090660  | -0.725261 | 0              |
| Medtr3g104780 | 0.740258 | 17.6 kDa clas  | Medtr2g081050  | -0.72481  | HSP20-like ch  |
| Medtr4g082360 | 0.738343 | 0              | Medtr3g112370  | -0.724315 | beta-galactos  |
| Medtr3g111800 | 0.737434 | Protein of un  | Medtr8g023310  | -0.723085 | pectin methy   |
| Medtr4g129270 | 0.733183 | trehalose ph   | Medtr1g013040  | -0.722501 | Protein kinas  |
| Medtr2g075550 | 0.731549 | 0              | Medtr2g014400  | -0.721881 | 0              |
| Medtr5g066330 | 0.730249 | 0              | Medtr4g081950  | -0.721406 | expansin A1    |
| Medtr4g105250 | 0.729656 | Raffinose syn  | Medtr4g116870  | -0.719192 | Minichromos    |
| Medtr7g069740 | 0.729102 | RGA-like 1     | Medtr8g024060  | -0.718189 | Protein kinas  |
| Medtr4g088760 | 0.728159 | Protein of un  | Medtr8g100135  | -0.716392 | cytochrome F   |
| Medtr4g081500 | 0.726895 | 0              | Medtr8g098835  | -0.713338 | Protein of un  |
| Medtr1g032010 | 0.726333 | tolB protein-  | Medtr7g062310  | -0.710235 | laccase 17     |

|                |                |          |                |               |           |                |
|----------------|----------------|----------|----------------|---------------|-----------|----------------|
|                | Medtr0001s0660 | 0.721128 | Zinc-binding   | Medtr2g086580 | -0.709801 | Rho GTPase a   |
| uperfamily pro | Medtr4g129020  | 0.719983 | glutamine du   | Medtr7g056103 | -0.709478 | cytochrome F   |
|                | Medtr6g015815  | 0.7156   | HXXXD-type     | Medtr8g070700 | -0.709252 | Domain of un   |
|                | Medtr5g013440  | 0.699165 | expansin-like  | Medtr5g091690 | -0.70812  | phy rapidly re |
|                | Medtr1g092420  | 0.694711 | 0              | Medtr7g103440 | -0.706207 | Leucine-rich r |
| erage family p | Medtr0015s0090 | 0.69148  | Concanavalin   | Medtr8g018040 | -0.706163 | disease resist |
|                | Medtr7g117415  | 0.690652 | Protein with   | Medtr4g011720 | -0.70252  | 2-oxoglutarat  |
|                | Medtr5g082130  | 0.690262 | Tetratricopep  | Medtr7g096090 | -0.702487 | indole-3-acet  |
|                | Medtr5g079950  | 0.687385 | expansin A4    | Medtr5g054730 | -0.702081 | Transmembra    |
|                | Medtr1g105885  | 0.687261 | cysteine-rich  | Medtr4g036990 | -0.695675 | 0              |
|                | Medtr1g007905  | 0.682399 | 0              | Medtr1g098680 | -0.695283 | 0              |
| in             | Medtr2g435310  | 0.682354 | MLP-like prot  | Medtr5g078210 | -0.69495  | SGNH hydroly   |
|                | Medtr1g097910  | 0.680104 | Chalcone anc   | Medtr2g016460 | -0.694608 | Xanthine/ura   |
|                | Medtr2g086920  | 0.679323 | F-box family   | Medtr3g102180 | -0.693372 | Leucine-rich r |
|                | Medtr1g102370  | 0.678372 | basic helix-lo | Medtr8g075100 | -0.692152 | Peroxidase su  |
|                | Medtr7g024765  | 0.677612 | Acyl-CoA N-a   | Medtr5g017260 | -0.691392 | alpha/beta-H   |
| uperfamily pro | Medtr7g024280  | 0.675501 | delta(3), delt | Medtr4g128750 | -0.691052 | CAP (Cysteine  |
|                | Medtr6g028100  | 0.672787 | Glycosyl hydr  | Medtr3g106510 | -0.690556 | 0              |
|                | Medtr8g015220  | 0.672469 | myo-inositol   | Medtr8g044230 | -0.690184 | Leucine-rich r |
|                | Medtr1g015410  | 0.669822 | cytokinin ox   | Medtr1g105495 | -0.689151 | xyloglucan en  |
| uperfamily pro | Medtr1g028300  | 0.668307 | highly ABA-in  | Medtr2g007960 | -0.688989 | nodulin MtN2   |
|                | Medtr4g108830  | 0.668084 | RING/U-box s   | Medtr2g034810 | -0.688566 | 0              |
|                | Medtr8g039090  | 0.66616  | NADPH:quin     | Medtr2g063110 | -0.687395 | Eukaryotic as  |
| protein        | Medtr5g071560  | 0.662624 | mitogen-acti   | Medtr4g063090 | -0.683901 | gamma tonop    |
|                | Medtr4g478130  | 0.661528 | 0              | Medtr4g100590 | -0.682043 | 2-oxoglutarat  |
|                | Medtr8g079360  | 0.661068 | Disease resist | Medtr5g015840 | -0.680612 | 0              |
|                | Medtr4g100975  | 0.659203 | 0              | Medtr7g105850 | -0.680191 | Eukaryotic as  |
|                | Medtr8g105190  | 0.657882 | 0              | Medtr5g063620 | -0.678126 | histone H4     |
|                | Medtr2g096120  | 0.652989 | 0              | Medtr8g018690 | -0.676766 | PLAT/LH2 do    |
|                | Medtr3g102980  | 0.651629 | salt tolerance | Medtr5g074500 | -0.676028 | Nuclear trans  |
|                | Medtr3g030850  | 0.651351 | Photosystem    | Medtr4g088055 | -0.674799 | RAC-like 2     |
|                | Medtr2g061780  | 0.650561 | 0              | Medtr4g011880 | -0.67428  | indole-3-acet  |
|                | Medtr1g106730  | 0.650127 | salt tolerance | Medtr5g015260 | -0.672706 | Galactosyl tra |
|                | Medtr4g104540  | 0.648913 | cytochrome f   | Medtr5g064345 | -0.672646 | Phosphate-re   |
|                | Medtr6g027480  | 0.646069 | 0              | Medtr6g088670 | -0.672134 | ABC transpor   |
|                | Medtr4g081870  | 0.645083 | NAC-like, act  | Medtr2g062730 | -0.671113 | NAC (No Apic   |
|                | Medtr3g104030  | 0.644227 | Protein of Un  | Medtr8g072010 | -0.670666 | Pectinacety    |
| rotein         | Medtr3g084990  | 0.640596 | 0              | Medtr3g085270 | -0.670463 | Protein of un  |
| uperfamily pro | Medtr3g075390  | 0.63938  | Cysteine prot  | Medtr2g094060 | -0.670173 | beta-galactos  |
|                | Medtr3g078240  | 0.639098 | NHL domain-    | Medtr2g097030 | -0.669238 | expansin A4    |
|                | Medtr7g095170  | 0.638035 | Protein of un  | Medtr4g485630 | -0.662561 | UDP-glucosyl   |
|                | Medtr5g024020  | 0.636183 | lipoxygenase   | Medtr1g084120 | -0.662225 | Galactose ox   |
|                | Medtr8g104290  | 0.635854 | 0              | Medtr7g059080 | -0.660551 | 0              |

|   |                 |               |               |                 |                |                |                |
|---|-----------------|---------------|---------------|-----------------|----------------|----------------|----------------|
| 4 | superfamily pro | Medtr1g075340 | 0.634131      | Serine protea   | Medtr8g104820  | -0.660548      | glycosyl hydr  |
|   |                 | Medtr4g107720 | 0.632365      | SPFH/Band 7     | Medtr3g081030  | -0.659343      | RING/U-box s   |
|   |                 | Medtr3g464580 | 0.630302      | glutamine-de    | Medtr7g024480  | -0.654957      | 0              |
|   |                 | Medtr4g080020 | 0.629324      | RNI-like supe   | Medtr4g073770  | -0.652035      | like AUXIN RE  |
| 5 | ated protein f  | Medtr1g077660 | 0.628815      | Aluminium ac    | Medtr5g081560  | -0.649626      | RING/FYVE/P    |
|   |                 | Medtr1g105555 | 0.628513      | 0               | Medtr0305s0020 | -0.647959      | Calcium-depe   |
|   |                 | Medtr6g033280 | 0.628393      | phosphate tr    | Medtr3g087700  | -0.647218      | Protein of un  |
|   |                 | Medtr1g104610 | 0.628386      | Haloacid deh    | Medtr4g075690  | -0.644894      | SKU5 similar   |
|   | orters          | Medtr4g122800 | 0.6255        | cell wall / vac | Medtr1g085500  | -0.642443      | germin-like p  |
|   |                 | Medtr4g007710 | 0.624548      | 0               | Medtr4g063630  | -0.639976      | Pathogenesis   |
|   |                 | Medtr2g019370 | 0.623936      | gibberellin 2-  | Medtr3g109450  | -0.63871       | Protein of un  |
|   |                 | Medtr4g006970 | 0.623268      | CBL-interacti   | Medtr3g108290  | -0.638677      | Protein of un  |
|   |                 | Medtr2g031590 | 0.623067      | FAD-binding     | Medtr3g115050  | -0.637193      | SKU5 similar   |
|   |                 | Medtr5g029910 | 0.622657      | Tetratricopep   | Medtr7g096880  | -0.636795      | phosphate tra  |
| 5 |                 | Medtr1g015650 | 0.619257      | 0               | Medtr6g022020  | -0.635844      | Ubiquitin-like |
|   |                 | Medtr4g128840 | 0.619148      | xylose isome    | Medtr5g019120  | -0.632865      | PQ-loop repe   |
|   |                 | Medtr5g091930 | 0.616455      | citrate syntha  | Medtr8g099375  | -0.631881      | 0              |
|   |                 | Medtr1g074170 | 0.615213      | electron tran   | Medtr1g071480  | -0.631126      | NIMA-relatec   |
|   |                 | Medtr6g016650 | 0.614782      | Methylenete     | Medtr5g018110  | -0.630182      | Reticulan like |
|   |                 | Medtr7g108260 | 0.611886      | Thioredoxin s   | Medtr7g061020  | -0.63009       | ATP binding r  |
|   |                 | Medtr4g085890 | 0.611316      | 3-methylcro     | Medtr4g074190  | -0.627416      | Phototropic-r  |
|   |                 | Medtr4g051515 | 0.608403      | plant U-box 2   | Medtr4g088735  | -0.626721      | Pollen Ole e 1 |
|   |                 | Medtr4g094332 | 0.606515      | Vacuolar iron   | Medtr7g051910  | -0.625045      | Auxin-respon   |
|   |                 | Medtr3g102100 | 0.60607       | related to AP   | Medtr8g063940  | -0.623938      | spermidine sy  |
|   |                 | Medtr3g070230 | 0.605817      | ortholog of s   | Medtr1g099150  | -0.620834      | 0              |
|   |                 | Medtr8g066820 | 0.603724      | PLATZ transc    | Medtr1g019800  | -0.620544      | 0              |
|   |                 | Medtr5g017850 | 0.603173      | Peroxidase su   | Medtr1g090987  | -0.617974      | cytochrome F   |
|   |                 | Medtr4g118800 | 0.600901      | Uncharacteri    | Medtr4g104320  | -0.617972      | Pectin lyase-l |
|   |                 | Medtr6g086805 | 0.600735      | heat shock tr   | Medtr4g094925  | -0.61443       | S-adenosyl-L-  |
|   |                 | Medtr4g089100 | 0.59736       | Protein of un   | Medtr4g081220  | -0.613566      | Pentatricopep  |
|   |                 | Medtr1g034030 | 0.597088      | Protein kinas   | Medtr1g047370  | -0.612142      | Pectin lyase-l |
|   |                 | Medtr2g039320 | 0.592756      | 0               | Medtr2g065360  | -0.611164      | cytochrome F   |
|   |                 | Medtr6g088500 | 0.591629      | NAD(P)-bindi    | Medtr4g048060  | -0.610493      | 0              |
|   |                 | Medtr8g041620 | 0.590847      | 2-oxoglutarat   | Medtr2g084020  | -0.609931      | Peroxidase su  |
|   | Medtr0113s0040  | 0.589313      | phloem prote  | Medtr1g087240   | -0.609161      | beta-xylosida  |                |
|   | Medtr5g053920   | 0.587963      | AP2/B3 trans  | Medtr3g060880   | -0.608796      | Leucine-rich r |                |
|   | Medtr3g092720   | 0.587754      | 30S ribosoma  | Medtr4g023730   | -0.607921      | NAD(P)-bindi   |                |
|   | Medtr7g095960   | 0.587405      | Protein of un | Medtr6g059760   | -0.607686      | Kunitz family  |                |
|   | Medtr7g093040   | 0.585554      | 0             | Medtr8g076160   | -0.606338      | Lactoylglutat  |                |
|   |                 |               |               | Medtr2g089490   | -0.605332      | Cyclin D6;1    |                |
|   |                 |               |               | Medtr4g014070   | -0.605274      | inflorescence  |                |
|   |                 |               |               | Medtr4g107110   | -0.604833      | ARM repeat s   |                |
|   |                 |               |               | Medtr4g057470   | -0.604402      | Protein of un  |                |

|               |           |                |
|---------------|-----------|----------------|
| Medtr7g028740 | -0.602335 | Squamosa pr    |
| Medtr8g035780 | -0.599937 | cytochrome F   |
| Medtr7g026340 | -0.595415 | O-Glycosyl hy  |
| Medtr4g066460 | -0.594416 | basic helix-lo |
| Medtr2g070730 | -0.593471 | interactor of  |
| Medtr3g014280 | -0.592413 | sequence-spe   |
| Medtr8g022870 | -0.591742 | Subtilase fam  |
| Medtr2g105390 | -0.589674 | tubby like pr  |
| Medtr4g101310 | -0.589449 | Bifunctional i |
| Medtr3g074930 | -0.588543 | purple acid p  |
| Medtr7g081750 | -0.587984 | Subtilase fam  |
| Medtr5g017160 | -0.587567 | ralf-like 34   |
| Medtr1g028610 | -0.585923 | arabinogalact  |
| Medtr8g036080 | -0.585658 | SEC7-like gua  |
| Medtr8g089745 | -0.585355 | Melibiose fan  |

M+K dataset. Transcripts were annotated with the Mt4.0v1 version of *M. truncatula* genomic data

| AM-K & NIM-K (115) | log2 f.c. AM-K | log2 f.c. NIM-K | Annotation     | AM-K & NIM-K (88) | log2 f.c. AM-K | log2 f.c. NIM-K |
|--------------------|----------------|-----------------|----------------|-------------------|----------------|-----------------|
| Medtr5g064060      | 4.36151        | 3.57357         | HSP20-like ch  | Medtr4g033200     | -2.71108       | -1.09344        |
| Medtr6g078250      | 3.74545        | 3.59813         | Kunitz family  | Medtr4g087810     | -2.44991       | -1.23116        |
| Medtr6g078280      | 3.66779        | 2.90316         | Kunitz family  | Medtr2g055940     | -2.28557       | -1.21548        |
| Medtr5g081530      | 3.48819        | 3.59721         | HSP20-like ch  | Medtr4g095010     | -1.8417        | -1.53393        |
| Medtr4g086750      | 3.19828        | 1.73828         | Cupredoxin s   | Medtr7g405710     | -1.73632       | -1.89221        |
| Medtr4g086740      | 3.05608        | 1.76327         | Cupredoxin s   | Medtr2g087470     | -1.5354        | -1.45906        |
| Medtr8g466220      | 2.87403        | 2.63485         | Leucine-rich r | Medtr4g033085     | -1.48612       | -1.06185        |
| Medtr4g017200      | 2.8295         | 1.71014         | Thiamine pyr   | Medtr7g070910     | -1.39537       | -1.16091        |
| Medtr8g088830      | 2.67966        | 1.27902         | plantacyanin   | Medtr6g087780     | -1.36167       | -0.762031       |
| Medtr1g015165      | 2.65897        | 2.62677         | 17.6 kDa clas  | Medtr8g088330     | -1.35421       | -0.927998       |
| Medtr8g093560      | 2.52908        | 2.27813         | chloroplastic  | Medtr4g078885     | -1.3024        | -1.32751        |
| Medtr4g106860      | 2.4905         | 1.51169         | Gibberellin-re | Medtr7g070740     | -1.2782        | -0.861948       |
| Medtr8g075780      | 2.39854        | 1.43051         | Chaperone D    | Medtr4g033170     | -1.27338       | -0.821685       |
| Medtr4g090525      | 2.39266        | 1.04389         | HAL2-like      | Medtr6g022040     | -1.26935       | -0.897474       |
| Medtr3g087280      | 2.28542        | 2.69031         | 0              | Medtr5g025730     | -1.23867       | -1.45854        |
| Medtr3g086200      | 2.0726         | 2.88649         | 0              | Medtr2g088190     | -1.2189        | -0.719258       |
| Medtr2g007970      | 1.98553        | 3.48148         | nodulin MtN2   | Medtr7g085120     | -1.19859       | -0.797378       |
| Medtr1g066640      | 1.97853        | 1.07482         | Peroxidase su  | Medtr4g117670     | -1.14499       | -0.907592       |
| Medtr8g461390      | 1.96195        | 1.50753         | SOUL heme-t    | Medtr2g040830     | -1.12602       | -0.717756       |
| Medtr2g045280      | 1.91601        | 1.17989         | Cytidine/deo   | Medtr5g034810     | -1.11978       | -0.926011       |
| Medtr3g030540      | 1.87571        | 1.07383         | Pectin lyase-l | Medtr7g070930     | -1.11096       | -0.73156        |
| Medtr6g059410      | 1.83902        | 1.10406         | kunitz trypsin | Medtr0118s0070    | -1.10997       | -0.60346        |
| Medtr4g081380      | 1.83562        | 0.867099        | C-terminal cy  | Medtr4g062500     | -1.06323       | -1.96034        |
| Medtr1g103150      | 1.79516        | 1.14321         | Acyl-CoA N-a   | Medtr2g044810     | -1.03467       | -0.595938       |
| Medtr3g098580      | 1.77398        | 2.29116         | Integrase-typ  | Medtr2g087390     | -1.03454       | -1.22953        |
| Medtr1g088110      | 1.70375        | 0.720833        | Pollen Ole e 1 | Medtr2g008225     | -1.02977       | -0.767911       |
| Medtr4g130540      | 1.68067        | 1.7221          | heat shock pr  | Medtr3g070290     | -1.02092       | -0.658775       |
| Medtr2g022490      | 1.66791        | 1.33757         | Eukaryotic as  | Medtr7g062550     | -1.00565       | -1.8818         |
| Medtr7g086320      | 1.66483        | 2.94028         | 0              | Medtr0088s0100    | -1.00556       | -1.00083        |
| Medtr3g107500      | 1.65542        | 1.04342         | plant natriure | Medtr5g069180     | -1.00242       | -0.660775       |
| Medtr6g061850      | 1.58356        | 1.63229         | HSP20-like ch  | Medtr5g081030     | -0.977034      | -1.22837        |
| Medtr3g024520      | 1.57991        | 1.09907         | Cytochrome l   | Medtr4g094828     | -0.971991      | -0.690146       |
| Medtr8g096900      | 1.57238        | 0.952874        | osmotin 34     | Medtr4g032750     | -0.971897      | -0.749561       |
| Medtr7g102380      | 1.55525        | 1.61299         | Pathogenesis   | Medtr7g065740     | -0.968115      | -1.68541        |
| Medtr1g029500      | 1.50343        | 1.19818         | F-box/RNI-lik  | Medtr7g104460     | -0.968057      | -1.4291         |

|               |          |          |                |               |           |           |
|---------------|----------|----------|----------------|---------------|-----------|-----------|
| Medtr3g100470 | 1.50088  | 1.87083  | Predicted AT   | Medtr4g022290 | -0.939143 | -0.912601 |
| Medtr8g102350 | 1.49359  | 0.90281  | oxidative stre | Medtr1g035770 | -0.93033  | -0.802931 |
| Medtr8g089110 | 1.4214   | 1.07979  | plantacyanin   | Medtr5g040250 | -0.913293 | -0.888488 |
| Medtr4g080360 | 1.3808   | 1.45599  | Cysteine prot  | Medtr1g061340 | -0.909182 | -0.749421 |
| Medtr4g091590 | 1.34999  | 2.28681  | HSP20-like ch  | Medtr7g114990 | -0.898454 | -0.83325  |
| Medtr7g045860 | 1.34547  | 0.803489 | Protein kinas  | Medtr8g039540 | -0.89657  | -0.830587 |
| Medtr3g449930 | 1.33511  | 1.55881  | photosystem    | Medtr2g023680 | -0.889291 | -0.742794 |
| Medtr4g035880 | 1.29469  | 1.38938  | Plant invertas | Medtr7g059285 | -0.876601 | -0.889949 |
| Medtr7g102520 | 1.28894  | 1.50418  | UDP-Glycosyl   | Medtr8g069770 | -0.875018 | -0.985465 |
| Medtr6g452730 | 1.27894  | 1.40566  | PAR1 protein   | Medtr1g087710 | -0.846797 | -0.708341 |
| Medtr2g027550 | 1.27366  | 1.45411  | 0              | Medtr1g019715 | -0.824975 | -0.666767 |
| Medtr3g064350 | 1.22317  | 1.21115  | oxidative stre | Medtr4g077160 | -0.823287 | -1.05208  |
| Medtr1g017700 | 1.22242  | 0.75599  | phytosulfokir  | Medtr5g083960 | -0.815699 | -0.623977 |
| Medtr7g103390 | 1.21511  | 2.03136  | 0              | Medtr4g051880 | -0.815555 | -0.739296 |
| Medtr7g107710 | 1.19654  | 0.78409  | Flavin-contain | Medtr1g104840 | -0.80896  | -0.790534 |
| Medtr7g079900 | 1.17834  | 1.32078  | photosystem    | Medtr5g016320 | -0.808888 | -1.53606  |
| Medtr7g096830 | 1.17159  | 1.27157  | ethylene-resp  | Medtr4g088870 | -0.791803 | -0.906272 |
| Medtr4g066210 | 1.15638  | 0.808154 | beta glucosid  | Medtr2g436710 | -0.762097 | -0.672426 |
| Medtr7g117900 | 1.15609  | 0.89955  | ATPase, F1 co  | Medtr2g080230 | -0.760011 | -0.894008 |
| Medtr8g107010 | 1.15421  | 1.22743  | FKBP-like pep  | Medtr7g026990 | -0.759658 | -1.12505  |
| Medtr2g034360 | 1.13459  | 0.908426 | 0              | Medtr8g006270 | -0.751752 | -1.33167  |
| Medtr4g088450 | 1.11537  | 0.979063 | HSP20-like ch  | Medtr3g083230 | -0.746573 | -0.811191 |
| Medtr3g077870 | 1.1117   | 1.76349  | similar to RCI | Medtr5g071200 | -0.732469 | -0.814098 |
| Medtr8g085650 | 1.10531  | 0.599627 | Galactose oxi  | Medtr7g083110 | -0.725256 | -0.779711 |
| Medtr3g103960 | 1.10467  | 1.8242   | CCCH-type zin  | Medtr5g040940 | -0.724138 | -1.08022  |
| Medtr8g096880 | 1.09725  | 0.698475 | UDP-D-glucos   | Medtr1g107460 | -0.718119 | -0.805371 |
| Medtr8g074040 | 1.06396  | 0.797997 | AMP-depend     | Medtr2g055430 | -0.71438  | -0.827122 |
| Medtr6g090460 | 1.04089  | 0.748138 | oxidative stre | Medtr3g086310 | -0.711563 | -0.721705 |
| Medtr8g094980 | 1.02019  | 0.919041 | SAUR-like au   | Medtr4g071090 | -0.709992 | -0.855956 |
| Medtr8g022300 | 1.0196   | 0.725453 | Dormancy/au    | Medtr5g061880 | -0.702641 | -0.880902 |
| Medtr1g030600 | 0.999947 | 1.5365   | nodulin MtN2   | Medtr8g019730 | -0.6947   | -0.762537 |
| Medtr6g037610 | 0.981083 | 1.09063  | Integrase-ty   | Medtr3g464720 | -0.694078 | -0.65011  |
| Medtr3g106920 | 0.975493 | 1.01374  | 0              | Medtr4g094285 | -0.693213 | -0.616699 |
| Medtr5g022210 | 0.951758 | 0.703816 | Chaperone D    | Medtr8g028460 | -0.688815 | -0.741272 |
| Medtr7g084000 | 0.94296  | 0.801788 | CCR-like       | Medtr5g089170 | -0.684954 | -0.728499 |
| Medtr3g076960 | 0.934376 | 1.23072  | 0              | Medtr6g048910 | -0.6797   | -0.764931 |
| Medtr2g093760 | 0.931085 | 1.35888  | 0              | Medtr4g011630 | -0.675508 | -0.77298  |
| Medtr4g022920 | 0.911117 | 1.34364  | tobamovirus    | Medtr4g005190 | -0.670585 | -0.655115 |
| Medtr4g098930 | 0.906091 | 0.730434 | expansin-like  | Medtr8g018590 | -0.670158 | -0.669985 |
| Medtr8g010320 | 0.896596 | 0.929908 | low-molecula   | Medtr7g080460 | -0.666378 | -0.821698 |
| Medtr1g083950 | 0.892393 | 1.7899   | Adenine nucl   | Medtr7g053500 | -0.665794 | -0.619197 |
| Medtr1g052470 | 0.842603 | 0.63999  | basic helix-lo | Medtr5g037930 | -0.66511  | -0.718586 |
| Medtr7g066690 | 0.816643 | 0.667521 | plant uncoup   | Medtr7g111500 | -0.662513 | -1.10145  |

|                |          |          |                                                         |                |           |           |
|----------------|----------|----------|---------------------------------------------------------|----------------|-----------|-----------|
| Medtr8g096860  | 0.813606 | 0.805148 | 0                                                       | Medtr2g069090  | -0.659523 | -0.646106 |
| Medtr5g083690  | 0.805975 | 1.13876  | dehydration-                                            | Medtr3g099620  | -0.64291  | -0.679599 |
| Medtr2g016650  | 0.805715 | 1.48078  | 0                                                       | Medtr2g098180  | -0.640278 | -0.647521 |
| Medtr6g008560  | 0.800548 | 0.762568 | terpene synt                                            | Medtr4g077590  | -0.632039 | -0.910972 |
| Medtr3g053890  | 0.799141 | 0.764036 | alanine:glyox                                           | Medtr7g098610  | -0.624839 | -0.878339 |
| Medtr3g062600  | 0.786251 | 0.793753 | Ribosomal pr                                            | Medtr3g090760  | -0.623715 | -0.796455 |
| Medtr7g016060  | 0.785418 | 2.03235  | B12D protein                                            | Medtr5g057990  | -0.61989  | -0.74361  |
| Medtr4g121930  | 0.770603 | 0.698551 | 0                                                       | Medtr0059s0170 | -0.618779 | -1.16453  |
| Medtr3g466180  | 0.762746 | 0.656326 | Peroxidase su                                           | Medtr1g105595  | -0.608041 | -0.803718 |
| Medtr2g008710  | 0.762348 | 0.661104 | Peroxidase su                                           | Medtr7g076150  | -0.59522  | -0.639115 |
| Medtr8g091590  | 0.75691  | 1.49546  | 0                                                       |                |           |           |
| Medtr5g062190  | 0.753231 | 1.01878  | 0                                                       |                |           |           |
| Medtr3g072170  | 0.749199 | 1.9811   | Hypoxia-responsive family protein                       |                |           |           |
| Medtr1g090683  | 0.748804 | 0.638406 | Protein of unknown function (DUF594)                    |                |           |           |
| Medtr8g075510  | 0.742632 | 0.713265 | Pathogenesis-related thaumatin superfamily protein      |                |           |           |
| Medtr2g013140  | 0.739469 | 0.611734 | Aluminium induced protein with YGL and LRDR motifs      |                |           |           |
| Medtr0018s0170 | 0.73004  | 1.21967  | Galactose oxidase/kelch repeat superfamily protein      |                |           |           |
| Medtr5g022390  | 0.716216 | 1.61974  | sulfurtransferase 18                                    |                |           |           |
| Medtr3g087278  | 0.711619 | 0.636765 | 0                                                       |                |           |           |
| Medtr7g072575  | 0.707287 | 0.841455 | SOS3-interacting protein 1                              |                |           |           |
| Medtr1g030480  | 0.705755 | 0.770282 | Pheophorbide a oxygenase family protein with Rieske [2  |                |           |           |
| Medtr8g009090  | 0.703379 | 0.620523 | 2-oxoglutarate (2OG) and Fe(II)-dependent oxygenase su  |                |           |           |
| Medtr4g057310  | 0.697796 | 0.987831 | CHY-type/CTCHY-type/RING-type Zinc finger protein       |                |           |           |
| Medtr7g065150  | 0.68681  | 0.614849 | 0                                                       |                |           |           |
| Medtr7g086340  | 0.674311 | 0.612821 | 0                                                       |                |           |           |
| Medtr5g089820  | 0.670673 | 0.591565 | 0                                                       |                |           |           |
| Medtr8g094290  | 0.656945 | 1.01456  | amino acid permease 2                                   |                |           |           |
| Medtr2g014240  | 0.653548 | 0.64463  | dormancy-associated protein-like 1                      |                |           |           |
| Medtr6g059530  | 0.652451 | 0.845735 | kunitz trypsin inhibitor 1                              |                |           |           |
| Medtr2g021150  | 0.640301 | 0.606486 | F-box and associated interaction domains-containing prc |                |           |           |
| Medtr7g077180  | 0.620701 | 0.66755  | 0                                                       |                |           |           |
| Medtr2g021690  | 0.601953 | 0.58987  | Family of unknown function (DUF716)                     |                |           |           |
| Medtr8g083450  | 0.59825  | 0.736639 | 0                                                       |                |           |           |
| Medtr1g088640  | 0.594906 | 1.25979  | Adenine nucleotide alpha hydrolases-like superfamily pr |                |           |           |
| Medtr2g010590  | 0.592388 | 0.720985 | basic pathogenesis-related protein 1                    |                |           |           |
| Medtr1g038680  | 0.588104 | 0.59106  | Peroxidase superfamily protein                          |                |           |           |
| Medtr3g013500  | 0.58564  | 0.709349 | sulfotransferase 2A                                     |                |           |           |

l-type 1

ase family protein

st integral protein

family protein

repeat protein kinase family protein

nhibitor/lipid-transfer protein/seed storage 2S albumin superfamily protein



top-helix (bHLH) DNA-binding superfamily protein  
repeat transmembrane protein kinase  
boundaries-domain 16  
e arabinogalactan-protein 11

yltransferase-like 2  
P450, family 72, subfamily A, polypeptide 15  
al Meristem) domain transcriptional regulator superfamily protein  
if nuclear-localized protein 1  
sferase family protein  
unknown function (DUF966)  
NTA-like 6  
transport/detoxification superfamily protein  
5  
n-containing protein  
containing protein  
dependent synthase family protein  
ning nucleoside triphosphate hydrolases superfamily protein  
uperfamily protein  
responsive NPH3 family protein  
partyl protease family protein  
trypsin and protease inhibitor protein  
known function (DUF3049)  
known function (DUF630) ;Protein of unknown function (DUF632)  
ng protein for Xklp2) protein family

e arabinogalactan-protein 11  
ain-containing disease resistance protein  
envelope protein 16-1

n  
aperones superfamily protein  
sidase 5  
lesterase 3  
e superfamily protein

ome maintenance (MCM2/3/5) family protein  
e superfamily protein  
P450, family 716, subfamily A, polypeptide 1  
known function (DUF604)

activating protein with PAK-box/P21-Rho-binding domain

P450, family 93, subfamily D, polypeptide 1

unknown function (DUF23)

regulated 1

repeat protein kinase family protein

ance protein (TIR-NBS-LRR class), putative

te (2OG) and Fe(II)-dependent oxygenase superfamily protein

ic acid inducible 14

ane amino acid transporter family protein

ase-type esterase superfamily protein

cil permease family protein

repeat protein kinase family protein

uperfamily protein

ydrolases superfamily protein

e-rich secretory proteins, Antigen 5, and Pathogenesis-related 1 protein) superfamily protein

repeat protein kinase family protein

ndotransglucosylase/hydrolase 8

21 /EamA-like transporter family protein

partyl protease family protein

olast intrinsic protein

te (2OG) and Fe(II)-dependent oxygenase superfamily protein

partyl protease family protein

main-containing lipoxygenase family protein

port factor 2 (NTF2) family protein

ic acid inducible 19

ansferase GMA12/MNN10 family protein

esponsive 1 family protein

ter family protein

cal Meristem) domain transcriptional regulator superfamily protein

esterase family protein

known function (DUF579)

sidase 8

transferase 73B3

dase/kelch repeat superfamily protein

olase 9B1  
superfamily protein

RESISTANT 2

HD zinc finger superfamily protein  
dependent lipid-binding (CaLB domain) plant phosphoribosyltransferase family protein  
known function (DUF581)

5

protein 10  
-related thaumatin superfamily protein  
known function (DUF630 and DUF632)  
known function (DUF581)

5

transporter 1;7  
superfamily protein  
at family protein / transmembrane family protein

d kinase 4

protein B13  
microtubule motor family protein  
responsive NPH3 family protein  
allergen and extensin family protein  
sive family protein  
ynthase 1

P450, family 76, subfamily C, polypeptide 2  
like superfamily protein  
methionine-dependent methyltransferases superfamily protein  
ptide repeat (PPR) superfamily protein  
like superfamily protein  
P450, family 71, subfamily B, polypeptide 34

uperfamily protein

se 2  
receptor-like protein kinase family protein  
ng Rossmann-fold superfamily protein  
trypsin and protease inhibitor protein  
hione lyase / glyoxalase I family protein

meristem receptor-like kinase 2  
superfamily protein  
known function (DUF1635)

omoter-binding protein-like (SBP domain) transcription factor family protein  
P450, family 704, subfamily A, polypeptide 2  
hydrolases family 17 protein  
top-helix (bHLH) DNA-binding superfamily protein  
constitutive active ops 1  
specific DNA binding transcription factors  
ily protein  
rotein 8  
nhibitor/lipid-transfer protein/seed storage 2S albumin superfamily protein  
hosphatase 27  
ily protein  
tan protein 16  
nine nucleotide exchange family protein  
nily protein

base (<http://jcvi.org/medicago/index.php>). Up-regulated transcripts are highlighted in red and down-

| Annotation     | NM-K (199)    | log2 f.c. NM-K | Annotation     | NM-K (188)    | log2 f.c. NM-K | Annotation      |
|----------------|---------------|----------------|----------------|---------------|----------------|-----------------|
| O-methyltran   | Medtr6g078140 | inf            | Kunitz family  | Medtr2g030825 | -3.02012       | late embryog    |
| alpha/beta-H   | Medtr1g062350 | 3.2228         | Pathogenesis   | Medtr2g030845 | -1.91225       | late embryog    |
| O-methyltran   | Medtr1g086490 | 2.78538        | Peroxidase su  | Medtr2g021580 | -1.68919       | late embryog    |
| 0              | Medtr1g062370 | 2.60101        | Pathogenesis   | Medtr2g069660 | -1.67035       | Pathogenesis    |
| senescence-a   | Medtr1g060990 | 2.14439        | Duplicated hc  | Medtr3g028340 | -1.55862       | 0               |
| Protein of un  | Medtr7g024890 | 2.08806        | Calcium-bind   | Medtr2g009480 | -1.46533       | hydroxyprolin   |
| O-methyltran   | Medtr7g022490 | 2.06621        | BCL-2-associa  | Medtr4g077880 | -1.40847       | AAA-type AT     |
| UDP-glucosyl   | Medtr6g036450 | 1.97632        | nodulin MtN    | Medtr7g087047 | -1.29522       | zinc finger (R  |
| 0              | Medtr8g098620 | 1.8864         | 0              | Medtr3g463490 | -1.26979       | cell division c |
| 0              | Medtr7g096750 | 1.88264        | Integrase-typ  | Medtr1g084170 | -1.2679        | 0               |
| Disease resist | Medtr1g056370 | 1.85257        | Disease resist | Medtr5g061860 | -1.26422       | slufate transp  |
| UDP-glucosyl   | Medtr7g063270 | 1.8338         | NAD(P)-bindi   | Medtr4g044463 | -1.25089       | Stigma-specif   |
| O-methyltran   | Medtr8g468290 | 1.76563        | 0              | Medtr4g102650 | -1.21105       | 0               |
| Ubiquitin-like | Medtr3g016290 | 1.75398        | 0              | Medtr4g049640 | -1.15353       | SLAC1 homol     |
| Copper amine   | Medtr1g069825 | 1.70504        | Protein of un  | Medtr3g108760 | -1.13044       | FASCICLIN-lik   |
| Zinc-binding c | Medtr4g068453 | 1.69705        | 0              | Medtr2g086270 | -1.13027       | centroradialis  |
| apyrase 2      | Medtr5g018540 | 1.67365        | 0              | Medtr4g087240 | -1.10768       | Zinc-finger dc  |
| Copper amine   | Medtr7g096700 | 1.65681        | Integrase-typ  | Medtr3g117880 | -1.06547       | minichromos     |
| chitinase A    | Medtr2g011690 | 1.61499        | Wound-respc    | Medtr7g075790 | -1.06339       | Calcium-depe    |
| TRICHOME BI    | Medtr2g089835 | 1.60782        | Wound-respc    | Medtr2g043560 | -1.05013       | Plant invertas  |
| UDP-glucosyl   | Medtr7g024880 | 1.60461        | Calcium-bind   | Medtr3g467460 | -1.04659       | 0               |
| expansin B2    | Medtr8g101650 | 1.59435        | myb-like tran  | Medtr8g479380 | -1.04454       | SKU5 similar    |
| cytochrome F   | Medtr3g058440 | 1.5826         | F-box family   | Medtr4g039740 | -1.03896       | Protein of un   |
| Plant invertas | Medtr4g120950 | 1.56465        | 0              | Medtr3g056635 | -1.01056       | NB-ARC doma     |
| Protein of un  | Medtr8g036075 | 1.51605        | EF hand calci  | Medtr1g028360 | -1.00471       | spermidine sy   |
| UDP-Glycosyl   | Medtr7g024873 | 1.50455        | Calcium-bind   | Medtr4g114120 | -1.00446       | P-loop contai   |
| anthranilate s | Medtr1g067660 | 1.48159        | C2H2 and C2    | Medtr4g039720 | -0.995177      | Protein of un   |
| 2-oxoglutarat  | Medtr4g030210 | 1.47855        | organic catio  | Medtr5g026360 | -0.993279      | UDP-Glycosyl    |
| Arginase/dea   | Medtr4g079830 | 1.47264        | Plant Tudor-l  | Medtr4g018800 | -0.982724      | cytochrome F    |
| Heavy metal    | Medtr7g067010 | 1.45615        | peptide trans  | Medtr6g015905 | -0.976746      | reversibly gly  |
| haemoglobin    | Medtr3g086230 | 1.43991        | photosystem    | Medtr5g037250 | -0.943383      | BIG PETAL P     |
| HXXXD-type a   | Medtr7g096930 | 1.37966        | myb domain     | Medtr8g042510 | -0.935132      | RING/FYVE/P     |
| 0              | Medtr1g088845 | 1.33841        | glutathione S  | Medtr3g031040 | -0.931001      | topoisomeras    |
| glutathione S  | Medtr7g083770 | 1.32968        | LYR family of  | Medtr1g100180 | -0.922385      | detoxifying e   |
| centroradialis | Medtr4g033150 | 1.32033        | O-methyltran   | Medtr4g019040 | -0.91515       | 0               |

|                |               |          |                 |                |           |                |
|----------------|---------------|----------|-----------------|----------------|-----------|----------------|
| HXXXD-type a   | Medtr8g096530 | 1.31495  | HXXXD-type a    | Medtr4g059670  | -0.911104 | late embryog   |
| drought-repr   | Medtr1g070495 | 1.29974  | photosystem     | Medtr3g053240  | -0.907269 | Stigma-specif  |
| origin recogn  | Medtr8g074810 | 1.27321  | 2-oxoglutarat   | Medtr1g026020  | -0.905989 | expansin 11    |
| Nucleotide-di  | Medtr7g077210 | 1.25552  | 0               | Medtr1g082390  | -0.894292 | GDSL-like Lip  |
| NAD(P)-linke   | Medtr8g019440 | 1.23336  | 0               | Medtr7g109480  | -0.885024 | Minichromos    |
| Eukaryotic as  | Medtr8g093440 | 1.22901  | Protein of un   | Medtr1g070120  | -0.88131  | 2-oxoglutarat  |
| cytochrome F   | Medtr3g080860 | 1.21136  | 0               | Medtr7g076080  | -0.881021 | Homeobox-le    |
| Leucine-rich r | Medtr2g089815 | 1.20814  | Wound-respc     | Medtr7g069930  | -0.870885 | 0              |
| nucleolar RN   | Medtr1g006990 | 1.20378  | Subtilisin-like | Medtr8g445730  | -0.86588  | 0              |
| 0              | Medtr5g022380 | 1.1957   | Major facilita  | Medtr3g046880  | -0.863149 | alpha/beta-H   |
| EF hand calci  | Medtr7g032240 | 1.1849   | CCT motif far   | Medtr2g010450  | -0.85786  | basic helix-lo |
| myosin-relate  | Medtr1g022440 | 1.18485  | dihydroflavor   | Medtr4g059630  | -0.855669 | late embryog   |
| LOB domain-c   | Medtr4g113820 | 1.18381  | early nodulin   | Medtr4g108150  | -0.851147 | Bifunctional i |
| Late embryog   | Medtr5g043930 | 1.17605  | C2H2-like zin   | Medtr3g113210  | -0.849977 | glyoxal oxida  |
| 0              | Medtr5g092790 | 1.15108  | RING/U-box s    | Medtr1g019280  | -0.829157 | Remorin fami   |
| Auxin-respon   | Medtr2g044140 | 1.1374   | flavin-depend   | Medtr5g062320  | -0.828105 | Glycosyl hydr  |
| RING membra    | Medtr3g027940 | 1.13385  | Leucine-rich r  | Medtr1g081970  | -0.820657 | DNAJ heat sh   |
| multidrug res  | Medtr1g080210 | 1.1224   | Protein of un   | Medtr3g062840  | -0.818237 | Protein of un  |
| Late embryog   | Medtr5g010000 | 1.12027  | glycosyl hydr   | Medtr4g122270  | -0.817807 | minichromos    |
| Peroxidase su  | Medtr2g035440 | 1.11761  | Haloacid deh    | Medtr7g093220  | -0.816752 | 0              |
| UDP-Glycosyl   | Medtr3g089977 | 1.11583  | alcohol dehy    | Medtr2g008226  | -0.814905 | UDP-Glycosyl   |
| Thymidine kir  | Medtr8g092930 | 1.11527  | RING/U-box s    | Medtr4g132320  | -0.81234  | SKU5 similar   |
| Mannose-bin    | Medtr7g087080 | 1.11292  | 0               | Medtr8g037170  | -0.810187 | MATE efflux f  |
| Endosomal ta   | Medtr8g045570 | 1.08567  | Polyketide cy   | Medtr7g013610  | -0.807897 | Histone supe   |
| ribonuclease   | Medtr3g095540 | 1.08212  | photosystem     | Medtr7g035445  | -0.807809 | zinc finger (C |
| Leucine-rich r | Medtr7g086380 | 1.08016  | Protein of un   | Medtr3g113140  | -0.806418 | Leucine-rich r |
| cytochrome F   | Medtr6g092620 | 1.06868  | ACC oxidase :   | Medtr0554s0020 | -0.806191 | cytochrome F   |
| Pectate lyase  | Medtr5g010580 | 1.04745  | 0               | Medtr1g106775  | -0.802997 | Peroxisomal i  |
| Minichromos    | Medtr8g010440 | 1.0467   | NB-ARC dom:     | Medtr4g132160  | -0.800555 | 0              |
| sulfate transp | Medtr7g061550 | 1.04253  | myb-like HTH    | Medtr7g094940  | -0.794572 | PATATIN-like   |
| Disease resist | Medtr3g048590 | 1.04128  | receptor like   | Medtr8g020960  | -0.794491 | Cytochrome l   |
| Clathrin, heav | Medtr2g104380 | 1.03984  | serine-rich pr  | Medtr8g091700  | -0.793469 | 0              |
| beta-D-xylosi  | Medtr4g120940 | 1.03519  | 0               | Medtr4g036050  | -0.791581 | AGAMOUS-lil    |
| S-adenosyl-L-  | Medtr1g093980 | 1.02584  | 0               | Medtr8g075950  | -0.790322 | Chalcone-flav  |
| heat shock tr  | Medtr8g052100 | 1.02171  | 0               | Medtr5g017710  | -0.788513 | 0              |
| 0              | Medtr4g023070 | 1.02082  | F-box family j  | Medtr1g016070  | -0.784028 | Fatty acid/spl |
| pleiotropic dr | Medtr6g076090 | 1.01477  | Disease resist  | Medtr8g036660  | -0.781699 | MATE efflux f  |
| Terpenoid cy   | Medtr3g110205 | 1.01469  | Integrase-ty    | Medtr3g438070  | -0.775457 | BANQUO 3       |
| lipoxygenase   | Medtr5g074580 | 1.0084   | O-methyltrar    | Medtr5g009620  | -0.775167 | cytokinin resp |
| Integrase-ty   | Medtr4g070640 | 1.0073   | 0               | Medtr1g044120  | -0.773212 | Helicase prot  |
| O-Glycosyl hy  | Medtr5g014040 | 1.00181  | CheY-like tw    | Medtr4g050060  | -0.771951 | 0              |
| thioredoxin 2  | Medtr1g010270 | 0.997045 | molybdate tr    | Medtr7g094250  | -0.770727 | oxidoreducta   |
| 0              | Medtr6g071990 | 0.990201 | Pyridoxal ph    | Medtr5g024340  | -0.768248 | Protein phosp  |

|                |                |          |                |                |           |                 |
|----------------|----------------|----------|----------------|----------------|-----------|-----------------|
| 2-oxoglutarat  | Medtr1g112740  | 0.990197 | FAD/NAD(P)-    | Medtr1g077790  | -0.765898 | early nodulin   |
| basic helix-lo | Medtr8g009560  | 0.989463 | Fatty acid hyd | Medtr7g099820  | -0.76209  | cation/H+ exc   |
| Integrase-ty   | Medtr4g120970  | 0.979423 | 0              | Medtr5g062430  | -0.758044 | Glycosyl hydr   |
| 0              | Medtr5g055800  | 0.976077 | senescence-r   | Medtr5g069800  | -0.756467 | Glycosyl hydr   |
| Leucine-rich r | Medtr3g111970  | 0.959207 | 0              | Medtr2g030835  | -0.754311 | late embryog    |
| cytokinin resp | Medtr4g116277  | 0.937986 | serine-rich pr | Medtr7g056817  | -0.754246 | 0               |
| alpha-xylosid  | Medtr8g021010  | 0.930415 | 0              | Medtr5g023660  | -0.748316 | chromometh      |
| cytochrome F   | Medtr2g089930  | 0.925316 | Wound-respc    | Medtr3g462730  | -0.74668  | Histone supe    |
| cysteine-rich  | Medtr8g022440  | 0.924562 | SAUR-like au   | Medtr5g068780  | -0.744581 | Ribosomal pr    |
| S-adenosyl-L-  | Medtr3g088970  | 0.923935 | arginosuccina  | Medtr1g082920  | -0.737194 | P-loop contai   |
|                | Medtr1g022395  | 0.921048 | 0              | Medtr8g090000  | -0.736981 | minichromos     |
|                | Medtr8g022040  | 0.915407 | Tetratricopep  | Medtr2g436680  | -0.735499 | multidrug res   |
|                | Medtr1g034120  | 0.914764 | 2-oxoglutarat  | Medtr7g084750  | -0.731848 | xyloglucan er   |
|                | Medtr5g022350  | 0.905158 | Pathogenesis   | Medtr5g094310  | -0.725471 | Kinesin moto    |
|                | Medtr1g017080  | 0.902094 | KNOTTED-like   | Medtr7g067950  | -0.725386 | 0               |
|                | Medtr1g025490  | 0.901564 | 0              | Medtr8g042910  | -0.724164 | Plant invertas  |
|                | Medtr3g089940  | 0.90046  | alcohol dehyd  | Medtr0184s0030 | -0.723696 | UDP-Glycosyl    |
|                | Medtr1g029150  | 0.897026 | Plant stearoy  | Medtr7g059070  | -0.72294  | Histone supe    |
|                | Medtr4g125080  | 0.881043 | inter-alpha-tr | Medtr3g464330  | -0.722652 | fatty acid des  |
|                | Medtr1g054150  | 0.877494 | 0              | Medtr8g099305  | -0.720291 | HMG (high m     |
| Fe-2S] domain  | Medtr8g028780  | 0.863287 | ferric reducti | Medtr5g022010  | -0.720047 | Chalcone-flav   |
| uperfamily pro | Medtr7g092400  | 0.858419 | A20/AN1-like   | Medtr0807s0020 | -0.718752 | 0               |
|                | Medtr6g033580  | 0.84304  | sucrose-prot   | Medtr2g035230  | -0.71729  | Histone supe    |
|                | Medtr0009s0120 | 0.842604 | phosphoinosi   | Medtr8g103700  | -0.716814 | Leucine-rich r  |
|                | Medtr5g012390  | 0.834419 | Lactate/mala   | Medtr3g063110  | -0.713883 | DUTP-PYROP      |
|                | Medtr4g072980  | 0.828169 | SAUR-like au   | Medtr3g462130  | -0.709805 | proliferating c |
|                | Medtr1g014320  | 0.828013 | aldehyde deh   | Medtr1g017490  | -0.707553 | growth-regul    |
|                | Medtr6g014270  | 0.825082 | UDP-glucosyl   | Medtr8g080570  | -0.707382 | Rubber elong    |
|                | Medtr4g094608  | 0.824433 | 0              | Medtr8g471150  | -0.69754  | basic helix-lo  |
| otein          | Medtr4g094428  | 0.821698 | Protein of un  | Medtr5g066320  | -0.694651 | P-loop contai   |
|                | Medtr8g069330  | 0.821636 | Phototropic-r  | Medtr1g075680  | -0.692995 | P-loop contai   |
|                | Medtr6g477860  | 0.816745 | Homeodoma      | Medtr3g054010  | -0.685809 | Protein of un   |
|                | Medtr1g007920  | 0.809511 | IQ-domain 21   | Medtr6g032885  | -0.683993 | ARM repeat s    |
| otein          | Medtr6g065460  | 0.805181 | Kunitz family  | Medtr5g065900  | -0.682232 | 0               |
|                | Medtr5g015470  | 0.800177 | 0              | Medtr4g064967  | -0.677478 | histone H2A     |
|                | Medtr4g124650  | 0.794908 | ATP binding r  | Medtr4g127670  | -0.676641 | Peroxidase su   |
|                | Medtr7g090020  | 0.78     | Ankyrin repe   | Medtr3g109320  | -0.67518  | calmodulin lil  |
|                | Medtr8g096840  | 0.77886  | Protein of un  | Medtr1g020080  | -0.673371 | RNA-binding     |
|                | Medtr5g097280  | 0.773864 | photosystem    | Medtr2g029180  | -0.672544 | Nucleotide/st   |
|                | Medtr1g087920  | 0.773084 | ethylene-resp  | Medtr1g017540  | -0.671819 | P-loop contai   |
|                | Medtr5g047060  | 0.769271 | Malectin/rec   | Medtr4g128690  | -0.669183 | UDP-glucosyl    |
|                | Medtr4g008050  | 0.766506 | B-box 32       | Medtr6g015875  | -0.668699 | COBRA-like e    |
|                | Medtr4g045990  | 0.766207 | Wound-respc    | Medtr2g039410  | -0.667991 | cytokinin oxi   |

|                |          |                |               |           |                 |
|----------------|----------|----------------|---------------|-----------|-----------------|
| Medtr2g089965  | 0.762356 | Wound-resp     | Medtr3g092890 | -0.665597 | 2-oxoglutarat   |
| Medtr7g108200  | 0.755123 | Glutaredoxin   | Medtr2g098910 | -0.660553 | crinkly4        |
| Medtr2g037970  | 0.755039 | 0              | Medtr4g065850 | -0.659236 | Leucine-rich r  |
| Medtr1g076500  | 0.750572 | Protein of un  | Medtr7g015970 | -0.659129 | reversibly gly  |
| Medtr0025s0110 | 0.750407 | cytochrome F   | Medtr7g081420 | -0.658442 | Subtilisin-like |
| Medtr1g031640  | 0.748604 | Polyketide cy  | Medtr2g088320 | -0.65729  | 0               |
| Medtr4g017040  | 0.744784 | RmlC-like cup  | Medtr3g065300 | -0.655981 | ARM repeat s    |
| Medtr5g072500  | 0.740141 | Protein kinas  | Medtr5g070680 | -0.655484 | alternative ox  |
| Medtr1g103420  | 0.737075 | Bifunctional i | Medtr4g122240 | -0.654243 | GRAS family t   |
| Medtr6g078100  | 0.728966 | Kunitz family  | Medtr4g035855 | -0.652273 | Plant invertas  |
| Medtr8g020650  | 0.727484 | germin-like p  | Medtr4g415390 | -0.652136 | Transmembra     |
| Medtr2g084280  | 0.727205 | FER-like regu  | Medtr3g058220 | -0.650619 | cytochrome F    |
| Medtr4g009950  | 0.726965 | VQ motif-con   | Medtr8g020610 | -0.646901 | germin-like p   |
| Medtr7g111260  | 0.723514 | Major facilita | Medtr1g026410 | -0.645613 | SKU5 similar    |
| Medtr1g013700  | 0.722798 | CBL-interacti  | Medtr7g093910 | -0.644673 | gamma histor    |
| Medtr0027s0230 | 0.722133 | HSP20-like ch  | Medtr3g087640 | -0.643676 | HXXXD-type a    |
| Medtr4g052460  | 0.721685 | F-box family   | Medtr3g115990 | -0.640388 | 0               |
| Medtr5g018550  | 0.717984 | 0              | Medtr4g116070 | -0.638724 | glucuronidas    |
| Medtr8g028265  | 0.717129 | BCL-2-associa  | Medtr3g461540 | -0.637501 | 0               |
| Medtr1g061640  | 0.712806 | sequence-spe   | Medtr5g064360 | -0.637269 | Phosphate-re    |
| Medtr5g015680  | 0.711283 | BTB and TAZ    | Medtr6g013420 | -0.637008 | early nodulin   |
| Medtr4g133040  | 0.709917 | importin alph  | Medtr3g084630 | -0.636586 | xyloglucan er   |
| Medtr1g111240  | 0.707618 | cinnamate-4-   | Medtr3g078490 | -0.635433 | aldehyde deh    |
| Medtr3g092790  | 0.701985 | Late embryog   | Medtr4g035980 | -0.634356 | Plant invertas  |
| Medtr1g075170  | 0.700789 | 0              | Medtr4g102790 | -0.634019 | GRAS family t   |
| Medtr2g090060  | 0.69943  | transferases;  | Medtr7g024390 | -0.632916 | heat shock pr   |
| Medtr5g024730  | 0.699241 | RING/U-box s   | Medtr1g112230 | -0.630498 | GHMP kinase     |
| Medtr4g063720  | 0.698715 | heat shock pr  | Medtr1g018205 | -0.630142 | voltage depe    |
| Medtr2g079670  | 0.698059 | Aluminium in   | Medtr4g112035 | -0.629345 | Plant protein   |
| Medtr4g025690  | 0.694371 | Plant invertas | Medtr7g105030 | -0.626468 | P-loop contai   |
| Medtr7g023590  | 0.692786 | polygalactur   | Medtr5g039180 | -0.626465 | basic helix-lo  |
| Medtr6g018270  | 0.688143 | LOB domain-    | Medtr5g029770 | -0.625463 | Histone supe    |
| Medtr8g005295  | 0.684445 | Plant protein  | Medtr3g112530 | -0.62495  | SLAC1 homol     |
| Medtr3g008820  | 0.684144 | Plant invertas | Medtr3g058210 | -0.624218 | cytochrome F    |
| Medtr2g089990  | 0.683767 | Wound-resp     | Medtr4g065007 | -0.623842 | dicarboxylate   |
| Medtr4g068560  | 0.680756 | 0              | Medtr2g089340 | -0.622388 | dehydratase     |
| Medtr3g104810  | 0.678368 | Mitochondria   | Medtr6g087980 | -0.621774 | RHO-related     |
| Medtr5g016450  | 0.671663 | maternal effe  | Medtr2g436750 | -0.620957 | ARM repeat s    |
| Medtr5g079780  | 0.670997 | 0              | Medtr7g013850 | -0.620604 | HXXXD-type a    |
| Medtr4g029550  | 0.664904 | 0              | Medtr3g110405 | -0.620133 | ataurora1       |
| Medtr7g055630  | 0.663104 | 0              | Medtr2g103440 | -0.617963 | 0               |
| Medtr5g081230  | 0.658689 | type one seri  | Medtr4g096700 | -0.617833 | Minichromos     |
| Medtr2g437370  | 0.655434 | CW-type Zinc   | Medtr7g089080 | -0.617376 | Cyclin family   |



|                |          |                                                     |               |           |                |
|----------------|----------|-----------------------------------------------------|---------------|-----------|----------------|
| Medtr4g090545  | 0.649823 | 0                                                   | Medtr1g076700 | -0.616427 | Microtubule    |
| Medtr3g109920  | 0.649822 | 0                                                   | Medtr4g071520 | -0.616016 | squalene syn   |
| Medtr2g086200  | 0.648403 | 0                                                   | Medtr8g028145 | -0.615699 | Dihydrodipic   |
| Medtr3g060740  | 0.647971 | 0                                                   | Medtr7g082230 | -0.613477 | 0              |
| Medtr2g481150  | 0.645743 | Wound-resp                                          | Medtr6g027540 | -0.613192 | C2 calcium/li  |
| Medtr1g063420  | 0.643737 | 0                                                   | Medtr7g062150 | -0.613041 | Haloacid deh   |
| Medtr3g463720  | 0.642534 | RING/U-box s                                        | Medtr2g437380 | -0.610726 | 2-oxoglutar    |
| Medtr2g094720  | 0.639366 | Mediator cor                                        | Medtr6g037220 | -0.610039 | 0              |
| Medtr4g086620  | 0.632561 | Protein of un                                       | Medtr1g088190 | -0.60876  | glycosyl hydr  |
| Medtr1g017830  | 0.631691 | Uncharacteri                                        | Medtr7g007090 | -0.607662 | chromometh     |
| Medtr0055s0050 | 0.628355 | 0                                                   | Medtr5g009020 | -0.604819 | ubiquitin-con  |
| Medtr8g074335  | 0.627604 | basic chitinas                                      | Medtr8g075260 | -0.603978 | Tetratricopep  |
| Medtr2g018630  | 0.626348 | serine carbox                                       | Medtr3g110030 | -0.602937 | GroES-like fa  |
| Medtr2g026040  | 0.623742 | Cystatin/mor                                        | Medtr4g056390 | -0.601593 | ser/arg-rich p |
| Medtr6g032830  | 0.623036 | GATA transcr                                        | Medtr5g033490 | -0.600984 | protein kinas  |
| Medtr1g016360  | 0.622023 | Protein of un                                       | Medtr3g055940 | -0.598559 | Kinesin moto   |
| Medtr7g086770  | 0.615709 | 0                                                   | Medtr1g091010 | -0.598016 | cytochrome F   |
| Medtr1g072860  | 0.61284  | inhibitor/inte                                      | Medtr5g078200 | -0.59782  | O-Glycosyl hy  |
| Medtr7g021220  | 0.612626 | Sterile alpha                                       | Medtr2g098250 | -0.595926 | Leucine-rich r |
| Medtr3g045460  | 0.611516 | 0                                                   | Medtr5g015600 | -0.595437 | ARM repeat s   |
| Medtr4g126120  | 0.611195 | alpha/beta-H                                        | Medtr1g080440 | -0.594617 | Leucine-rich r |
| Medtr5g046750  | 0.610735 | 0                                                   | Medtr3g110028 | -0.591075 | Homeodoma      |
| Medtr1g072360  | 0.609979 | F-box family                                        | Medtr2g059200 | -0.589765 | transducin fa  |
| Medtr2g022460  | 0.607599 | Eukaryotic as                                       | Medtr2g060070 | -0.58763  | Transducin/V   |
| Medtr4g123593  | 0.60732  | Transmembrane proteins 14C                          |               |           |                |
| Medtr4g109450  | 0.606699 | heat shock protein 101                              |               |           |                |
| Medtr3g091510  | 0.603708 | Protein with RING/U-box and TRAF-like domains       |               |           |                |
| Medtr2g014300  | 0.598466 | ERF domain protein 12                               |               |           |                |
| Medtr2g084985  | 0.596688 | Stress responsive A/B Barrel Domain                 |               |           |                |
| Medtr3g072110  | 0.595617 | Transmembrane amino acid transporter family protein |               |           |                |
| Medtr2g095060  | 0.594515 | 0                                                   |               |           |                |
| Medtr4g073040  | 0.594252 | farnesylated protein 6                              |               |           |                |
| Medtr1g075153  | 0.593817 | 0                                                   |               |           |                |
| Medtr7g018090  | 0.593601 | glutamine dumper 4                                  |               |           |                |
| Medtr3g084520  | 0.585443 | indole-3-acetate beta-D-glucosyltransferase         |               |           |                |





egulated ones are highlighted in green.
