# Supplementary material
Source: PubMed Central journal article supplement (PMC5338680)
Supplement: supp_pp.16.01959_PP2016-01959DR1_Table_S6.pdf [file supp_pp.16.01959_PP2016-01959DR1_Table_S6.pdf]

**Table S6.** Edge density analysis results for input gene sets.

| <b>DEG Set</b>           | <b>True Edge Density (# edges)</b> | <b>Mean Random Edge Density (# edges)</b> | <b>Standard Deviation Random Edge Density (# edges)</b> | <b>Z-score for true edge density</b> |
|--------------------------|------------------------------------|-------------------------------------------|---------------------------------------------------------|--------------------------------------|
| <b>Union of DEG sets</b> | 223                                | 88.14                                     | 8.11287                                                 | 16.623                               |
| <b>AM+K, all</b>         | 9                                  | 1.22                                      | 1.0971                                                  | 7.0914                               |
| <b>AM+K, up</b>          | 5                                  | 0.81                                      | 0.928722                                                | 4.51157                              |
| <b>AM+K, down</b>        | 4                                  | 0.07                                      | 0.256432                                                | 15.3257                              |
| <b>AM, all</b>           | 22                                 | 2.12                                      | 1.36537                                                 | 14.5601                              |
| <b>AM, up</b>            | 22                                 | 1.7                                       | 1.2673                                                  | 16.0183                              |
| <b>AM, down</b>          | 0                                  | 0                                         | 0                                                       | NA                                   |
| <b>AM-K, all</b>         | 40                                 | 8.94                                      | 2.64697                                                 | 11.7342                              |
| <b>AM-K, up</b>          | 21                                 | 1.66                                      | 1.24089                                                 | 15.5856                              |
| <b>AM-K, down</b>        | 18                                 | 2.87                                      | 1.53514                                                 | 9.85575                              |
| <b>-K, all</b>           | 15                                 | 1.45                                      | 1.01876                                                 | 13.3004                              |
| <b>-K, up</b>            | 14                                 | 0.83                                      | 0.93263                                                 | 14.1214                              |
| <b>-K, down</b>          | 1                                  | 0.04                                      | 0.196946                                                | 4.87442                              |
| <b>NM-K, all</b>         | 40                                 | 5.82                                      | 2.22193                                                 | 15.383                               |
| <b>NM-K, up</b>          | 21                                 | 1.2                                       | 1.13707                                                 | 17.4132                              |
| <b>NM-K, down</b>        | 19                                 | 1.53                                      | 1.33678                                                 | 13.0688                              |
