# Supplementary material
Source: PubMed Central journal article supplement (PMC5338680)
Supplement: supp_pp.16.01959_PP2016-01959DR1_Table_S7.pdf [file supp_pp.16.01959_PP2016-01959DR1_Table_S7.pdf]

## diffusion\_prioritization\_ALL

| gene description from Ensembl Plants              | AM+K_label        |
|---------------------------------------------------|-------------------|
| Medtr3g115620 ischel-related homeobox protein     | AM+K_not_in_group |
| Medtr7g005400 esis receptor kinase-like protein   | AM+K_not_in_group |
| Medtr2g087090 Serine/Threonine-kinase Nek4        | AM+K_not_in_group |
| Medtr2g089440 ocus lectin kinase family protein   | AM+K_not_in_group |
| Medtr4g078710 ethylene response factor            | AM+K_not_in_group |
| Medtr4g058015 electron transporter, putative      | AM+K_not_in_group |
| Medtr1g080210 xendent short hypocotyls protein    | AM+K_not_in_group |
| Medtr1g097580 LRR receptor-like kinase            | AM+K_not_in_group |
| Medtr5g014640 (LH) DNA-binding family protein     | AM+K_not_in_group |
| Medtr4g133938 ear transcription factor Y protein  | AM+K_not_in_group |
| Medtr2g105010 CBL-interacting kinase              | AM+K_not_in_group |
| Medtr1g107460 ceptor-like kinase family protein   | AM+K_not_in_group |
| Medtr3g115500 ceptor Serine/Threonine kinase      | AM+K_not_in_group |
| Medtr5g012490 aspartyl protease family protein    | AM+K_not_in_group |
| Medtr4g128990 receptor-like kinase                | AM+K_not_in_group |
| Medtr7g084000 light-regulated protein, putative   | AM+K_not_in_group |
| Medtr3g097150 aspartic proteinase nepenthesin     | AM+K_not_in_group |
| Medtr5g014520 (LH) DNA-binding family protein     | AM+K_not_in_group |
| Medtr3g069590 anyl-nucleotide exchange factor     | AM+K_not_in_group |
| Medtr4g117040 LK (receptor-like kinase) protein   | AM+K_not_in_group |
| Medtr2g087390 FAF-like protein                    | AM+K_not_in_group |
| Medtr2g087430 DUF3049 family protein              | AM+K_not_in_group |
| Medtr4g068780 CASP-like protein                   | AM+K_not_in_group |
| Medtr8g027040 ochrome P450 family 78 protein      | AM+K_not_in_group |
| Medtr8g008820 receptor-like kinase plant          | AM+K_not_in_group |
| Medtr2g011160 tor-like Serine/Threonine-kinase    | AM+K_not_in_group |
| Medtr6g065460 psin inhibitor / Alpha-fucosidase   | AM+K_not_in_group |
| Medtr2g090235 ethylene response factor            | AM+K_not_in_group |
| Medtr3g065020 zinc finger-like protein            | AM+K_not_in_group |
| Medtr2g018175 senescence regulator                | AM+K_not_in_group |
| Medtr2g100930 ranscription factor family protein  | AM+K_not_in_group |
| Medtr6g021730 rotein ligase RGLG2-like protein    | AM+K_not_in_group |
| Medtr5g013530 jasmonate zim-domain protein        | AM+K_not_in_group |
| Medtr8g432540 romeobox leucine zipper protein     | AM+K_not_in_group |
| Medtr3g062500 LRR receptor-like kinase            | AM+K_not_in_group |
| Medtr3g110180 casein kinase I-like protein        | AM+K_not_in_group |
| Medtr6g037610 domain class transcription factor   | AM+K_not_in_group |
| Medtr5g016060 esponsive NPH3 family protein       | AM+K_not_in_group |
| Medtr1g113960 ke tyrosine kinase family protein   | AM+K_not_in_group |
| Medtr1g082580 /Threonine kinase family protein    | AM+K_not_in_group |
| Medtr8g014930 LRR receptor-like kinase            | AM+K_not_in_group |
| Medtr6g044810 psin inhibitor / Alpha-fucosidase   | AM+K_not_in_group |
| Medtr7g077313 Bowman birk trypsin inhibitor       | AM+K_in_group     |
| Medtr5g010030 MAP kinase                          | AM+K_not_in_group |
| Medtr2g069420 module stress tolerance protein     | AM+K_not_in_group |
| Medtr3g078420 UVI1, putative                      | AM+K_not_in_group |
| Medtr6g071210 te dehydrogenase family protein     | AM+K_not_in_group |
| Medtr7g078730 ve 1-associated receptor kinase     | AM+K_not_in_group |
| Medtr8g085650 x/x/kelch-repeat plant-like protein | AM+K_not_in_group |
| Medtr8g014970 LRR receptor-like kinase plant      | AM+K_not_in_group |

## diffusion\_prioritization\_ALL

|                |                                    |                   |
|----------------|------------------------------------|-------------------|
| Medtr3g100500  | teinase nepenthesin-like protein   | AM+K_not_in_group |
| Medtr1g112200  | germin family 1 protein            | AM+K_not_in_group |
| Medtr2g437700  | clin-like arabinogalactan protein  | AM+K_not_in_group |
| Medtr4g101860  | osphate transporter family protein | AM+K_not_in_group |
| Medtr4g049730  | MAP kinase kinase kinase           | AM+K_not_in_group |
| Medtr1g110180  | all associated kinase-like protein | AM+K_not_in_group |
| Medtr2g101720  | omeobox leucine zipper protein     | AM+K_not_in_group |
| Medtr7g080460  | e-responsive transcription factor  | AM+K_not_in_group |
| Medtr3g080810  | ycosyl hydrolase family 9 protein  | AM+K_not_in_group |
| Medtr1g018090  | elix DNA-binding domain protein    | AM+K_not_in_group |
| Medtr4g086190  | ERF domain transcription factor    | AM+K_not_in_group |
| Medtr4g123940  | CBL-interacting kinase             | AM+K_not_in_group |
| Medtr3g111290  | BHLH transcriptional factor        | AM+K_not_in_group |
| Medtr8g079950  | e acyl-transferase family protein  | AM+K_not_in_group |
| Medtr7g052250  | UPF0361 C3orf37-like protein       | AM+K_not_in_group |
| Medtr1g105640  | rich receptor-kinase-like protein  | AM+K_not_in_group |
| Medtr5g011040  | ylglutaryl coenzyme A synthase     | AM+K_not_in_group |
| Medtr5g033940  | ransmembrane protein, putative     | AM+K_not_in_group |
| Medtr1g085620  | ctinacetylerase family protein     | AM+K_not_in_group |
| Medtr8g032320  | rg (CaLB domain) family protein    | AM+K_not_in_group |
| Medtr7g053200  | eonine-kinase OXI1-like protein    | AM+K_not_in_group |
| Medtr4g011630  | porter-like ABC domain protein     | AM+K_not_in_group |
| Medtr4g088770  | omain TIGR01615 family protein     | AM+K_not_in_group |
| Medtr1g105650  | rich receptor-kinase-like protein  | AM+K_not_in_group |
| Medtr5g005450  | rich receptor-kinase-like protein  | AM+K_not_in_group |
| Medtr3g464080  | eonine-kinase CCR4-like protein    | AM+K_not_in_group |
| Medtr3g437820  | ylgalacturonase inhibitor protein  | AM+K_not_in_group |
| Medtr4g079500  | bZIP family transcription factor   | AM+K_not_in_group |
| Medtr5g035030  | /Threonine kinase family protein   | AM+K_not_in_group |
| Medtr3g108808  | .type RING finger) family protein  | AM+K_not_in_group |
| Medtr4g009870  | F-box/LRR-like protein             | AM+K_not_in_group |
| Medtr4g094820  | PLC X domain plant-like protein    | AM+K_not_in_group |
| Medtr5g022130  | chaperone protein DnaJ 11          | AM+K_not_in_group |
| Medtr6g090380  | inc finger CCCH domain protein     | AM+K_not_in_group |
| Medtr8g012420  | DUF760 family protein              | AM+K_not_in_group |
| Medtr8g101540  | galactokinase                      | AM+K_not_in_group |
| Medtr7g070220  | DRE transcription factor           | AM+K_not_in_group |
| Medtr7g068770  | nscription factor GT-3a, putative  | AM+K_not_in_group |
| Medtr1g102380  | r bHLH120-like protein, putative   | AM+K_not_in_group |
| Medtr2g013950  | VQ motif protein                   | AM+K_not_in_group |
| Medtr5g023150  | ke tyrosine kinase family protein  | AM+K_not_in_group |
| Medtr2g101500  | ponsive AUX/IAA family protein     | AM+K_not_in_group |
| Medtr2g010580  | rich secretory protein, antigen 5  | AM+K_not_in_group |
| Medtr3g096370  | E3 ubiquitin ligase PUB14          | AM+K_not_in_group |
| Medtr3g109760  | \TA transcription factor, putative | AM+K_not_in_group |
| Medtr0008s0390 | myb-related transcription factor   | AM+K_not_in_group |
| Medtr8g093090  | WNK kinase                         | AM+K_not_in_group |
| Medtr4g123573  | rhomboid-like protein              | AM+K_not_in_group |
| Medtr4g033790  | hate-responsive 1 family protein   | AM+K_not_in_group |
| Medtr2g070460  | is-epoxycarotenoid dioxygenase     | AM+K_not_in_group |
| Medtr4g107010  | spotted leaf protein, putative     | AM+K_not_in_group |

diffusion\_prioritization\_ALL

|                |                                    |                   |
|----------------|------------------------------------|-------------------|
| Medtr2g075250  | LRR receptor-like kinase           | AM+K_not_in_group |
| Medtr3g113140  | LRR receptor-like kinase           | AM+K_not_in_group |
| Medtr2g028580  | LRR receptor-like kinase           | AM+K_not_in_group |
| Medtr8g100130  | ike DNA-binding domain protein     | AM+K_not_in_group |
| Medtr8g099195  | LRR receptor-like kinase           | AM+K_not_in_group |
| Medtr1g104890  | rich receptor-kinase-like protein  | AM+K_not_in_group |
| Medtr1g061590  | LRR receptor-like kinase           | AM+K_not_in_group |
| Medtr5g034090  | polygalacturonase                  | AM+K_not_in_group |
| Medtr7g097020  | dillo/beta-catenin repeat protein  | AM+K_not_in_group |
| Medtr6g038940  | receptor-like protein              | AM+K_not_in_group |
| Medtr7g104190  | bZIP transcription factor          | AM+K_not_in_group |
| Medtr4g083680  | LOB domain protein                 | AM+K_not_in_group |
| Medtr4g026030  | ochrome P450 family 71 protein     | AM+K_not_in_group |
| Medtr4g098900  | purine permease                    | AM+K_not_in_group |
| Medtr5g034240  | \MSH-like ubiquitin thioesterase   | AM+K_not_in_group |
| Medtr1g097160  | ryogenesis receptor-like kinase    | AM+K_not_in_group |
| Medtr0154s0040 | MAP3K-like kinase                  | AM+K_not_in_group |
| Medtr8g041670  | receptor-like kinase               | AM+K_not_in_group |
| Medtr7g023630  | ylgalacturonase inhibitor protein  | AM+K_not_in_group |
| Medtr5g083810  | ption factor bHLH93-like protein   | AM+K_not_in_group |
| Medtr1g023180  | auxin-induced 5NG4-like protein    | AM+K_not_in_group |
| Medtr3g072190  | peroxidase family protein          | AM+K_not_in_group |
| Medtr3g077430  | carboxyl-terminal peptidase        | AM+K_not_in_group |
| Medtr3g078090  | acturonase non-catalytic protein   | AM+K_not_in_group |
| Medtr4g009760  | SAM domain protein                 | AM+K_not_in_group |
| Medtr4g085570  | iment-plant-like protein, putative | AM+K_not_in_group |
| Medtr4g108100  | hypothetical protein               | AM+K_not_in_group |
| Medtr7g108905  | esterase/pectinesterase inhibitor  | AM+K_not_in_group |
| Medtr7g110710  | ycoside hydrolase family protein   | AM+K_not_in_group |
| Medtr8g020690  | acid carboxyl methyltransferase    | AM+K_not_in_group |
| Medtr8g099410  | endo-1,4-beta-glucanase            | AM+K_not_in_group |
| Medtr1g085640  | myb transcription factor MYB64     | AM+K_not_in_group |
| Medtr8g041910  | ysteine-rich receptor-like kinase  | AM+K_not_in_group |
| Medtr4g064570  | .type RING finger) family protein  | AM+K_not_in_group |
| Medtr5g024450  | ceptor-like kinase family protein  | AM+K_not_in_group |
| Medtr7g114020  | istidine phosphotransfer protein   | AM+K_not_in_group |
| Medtr7g072710  | reonine-kinase HT1-like protein    | AM+K_not_in_group |
| Medtr8g078940  | all associated kinase-like protein | AM+K_not_in_group |
| Medtr4g046113  | trubbelig receptor family protein  | AM+K_not_in_group |
| Medtr3g098580  | omain class transcription factor   | AM+K_not_in_group |
| Medtr4g097950  | (LH) DNA-binding family protein    | AM+K_not_in_group |
| Medtr6g011670  | transcription factor               | AM+K_not_in_group |
| Medtr4g097920  | (LH) DNA-binding family protein    | AM+K_not_in_group |
| Medtr1g015530  | ceptor-like kinase family protein  | AM+K_not_in_group |
| Medtr5g063740  | receptor-like protein              | AM+K_not_in_group |
| Medtr5g006160  | ocus lectin kinase family protein  | AM+K_in_group     |
| Medtr8g099350  | VRKY family transcription factor   | AM+K_not_in_group |
| Medtr2g040570  | nucleotide hydrolase               | AM+K_not_in_group |
| Medtr4g047870  | moting GTP-binding-like protein    | AM+K_not_in_group |
| Medtr4g063570  | plant/mmn10-180 protein            | AM+K_not_in_group |
| Medtr4g075730  | mbryogenesis abundant protein      | AM+K_not_in_group |

## diffusion\_prioritization\_ALL

|               |                                          |                   |
|---------------|------------------------------------------|-------------------|
| Medtr4g125810 | phosphatase 2C ABI2-like protein         | AM+K_not_in_group |
| Medtr5g009170 | UDP-D-galactose 4-epimerase              | AM+K_not_in_group |
| Medtr5g025010 | subtilisin-like serine protease          | AM+K_not_in_group |
| Medtr5g092740 | translation inhibitor-like protein       | AM+K_not_in_group |
| Medtr7g077215 | Bowman birk trypsin inhibitor            | AM+K_not_in_group |
| Medtr8g468500 | LRR receptor-like kinase                 | AM+K_not_in_group |
| Medtr2g022490 | extracellular dermal glycoprotein        | AM+K_not_in_group |
| Medtr4g126900 | associated leucine zipper protein        | AM+K_not_in_group |
| Medtr7g096830 | ethylene-responsive transcription factor | AM+K_not_in_group |
| Medtr1g022015 | peptidase family protein, putative       | AM+K_not_in_group |
| Medtr2g037850 | subtilisin-like serine protease          | AM+K_not_in_group |
| Medtr3g085610 | plant U-box protein                      | AM+K_not_in_group |
| Medtr7g013100 | carrier acetyl-CoA carboxylase           | AM+K_in_group     |
| Medtr8g011650 | in root cultures protein, putative       | AM+K_not_in_group |
| Medtr8g090130 | sugar transporter family protein         | AM+K_not_in_group |
| Medtr8g099450 | diphosphate kinase-like protein          | AM+K_not_in_group |
| Medtr1g014240 | lectin receptor kinase                   | AM+K_not_in_group |
| Medtr5g081990 | ischel-related homeobox protein          | AM+K_not_in_group |
| Medtr7g092730 | lygalacturonase inhibitor protein        | AM+K_not_in_group |
| Medtr2g436530 | ligase LIN-like protein, putative        | AM+K_not_in_group |
| Medtr5g039180 | transcription factor                     | AM+K_not_in_group |
| Medtr5g062700 | domain class transcription factor        | AM+K_not_in_group |
| Medtr1g018420 | C2H2-type zinc finger protein            | AM+K_not_in_group |
| Medtr3g072030 | wound-induced-like protein               | AM+K_not_in_group |
| Medtr4g113600 | plant/MSJ11-3 protein, putative          | AM+K_not_in_group |
| Medtr4g007750 | cyclin-dependent kinase                  | AM+K_not_in_group |
| Medtr7g057170 | LRR receptor-like kinase                 | AM+K_not_in_group |
| Medtr4g065870 | tion factor bHLH122-like protein         | AM+K_not_in_group |
| Medtr4g094885 | LRR receptor-like kinase                 | AM+K_not_in_group |
| Medtr5g034970 | A-like transporter family protein        | AM+K_not_in_group |
| Medtr7g109200 | cellulose synthase-like protein          | AM+K_not_in_group |
| Medtr4g088400 | cytochrome P450 family protein           | AM+K_not_in_group |
| Medtr7g098170 | er susceptibility protein, putative      | AM+K_not_in_group |
| Medtr2g010860 | C2H2-like zinc finger protein            | AM+K_not_in_group |
| Medtr2g019190 | jasmonate zim-domain protein             | AM+K_not_in_group |
| Medtr2g017825 | grin-linked kinase family protein        | AM+K_not_in_group |
| Medtr1g061690 | serine kinase-like protein               | AM+K_not_in_group |
| Medtr8g028720 | MAP kinase                               | AM+K_not_in_group |
| Medtr7g089400 | elix DNA-binding domain protein          | AM+K_not_in_group |
| Medtr6g079550 | RAB GTPase-like protein A1D              | AM+K_not_in_group |
| Medtr3g113660 | hypothetical protein                     | AM+K_not_in_group |
| Medtr4g019580 | peptide/nitrate transporter plant        | AM+K_not_in_group |
| Medtr7g086420 | receptor-like kinase                     | AM+K_not_in_group |
| Medtr5g077850 | aspartyl protease family protein         | AM+K_not_in_group |
| Medtr1g116210 | casein kinase I-like protein             | AM+K_not_in_group |
| Medtr3g068200 | ein phosphatase 2C-like protein          | AM+K_not_in_group |
| Medtr4g008150 | metal tolerance-like protein             | AM+K_not_in_group |
| Medtr4g077660 | maintenance protein 1/exportin           | AM+K_not_in_group |
| Medtr5g013690 | ie-binding protein) family protein       | AM+K_not_in_group |
| Medtr4g113100 | LRR receptor-like kinase                 | AM+K_not_in_group |
| Medtr7g081720 | LRR receptor-like kinase                 | AM+K_not_in_group |

diffusion\_prioritization\_ALL

|               |                                   |                   |
|---------------|-----------------------------------|-------------------|
| Medtr2g101560 | peptide/nitrate transporter plant | AM+K_not_in_group |
| Medtr5g009410 | domain class transcription factor | AM+K_not_in_group |
| Medtr2g055940 | saffaic acid O-methyltransferase  | AM+K_not_in_group |
| Medtr5g086080 | LysM receptor kinase K1B          | AM+K_not_in_group |
| Medtr1g115225 | LRR receptor-like kinase          | AM+K_not_in_group |
| Medtr6g470960 | ceptor-like kinase family protein | AM+K_not_in_group |
| Medtr8g011430 | lectin kinase family protein      | AM+K_not_in_group |
| Medtr1g108810 | MATE efflux family protein        | AM+K_not_in_group |
| Medtr3g030040 | cellulose synthase-like protein   | AM+K_not_in_group |
| Medtr3g090670 | myosin heavy chain-like protein   | AM+K_not_in_group |
| Medtr4g022480 | . type disease resistance protein | AM+K_not_in_group |
| Medtr4g022540 | . type disease resistance protein | AM+K_not_in_group |
| Medtr4g022560 | . type disease resistance protein | AM+K_not_in_group |
| Medtr4g062130 | nudix hydrolase-like protein      | AM+K_not_in_group |
| Medtr6g082620 | 3HC4 type (RING finger) protein   | AM+K_not_in_group |
| Medtr8g035760 | cytochrome P450 family protein    | AM+K_not_in_group |
| Medtr8g012290 | BHLH transcription factor         | AM+K_not_in_group |
| Medtr7g082470 | receptor-like kinase              | AM+K_not_in_group |
| Medtr1g076700 | ein, MAP65/ASE1 family protein    | AM+K_not_in_group |
| Medtr2g030530 | glycolipid transfer protein       | AM+K_not_in_group |
| Medtr3g013980 | VQ motif protein                  | AM+K_not_in_group |
| Medtr4g016920 | oside hydrolase family 1 protein  | AM+K_not_in_group |
| Medtr4g093580 | ta-ureidopropionase-like protein  | AM+K_not_in_group |
| Medtr5g013260 | ng oxidoreductase family protein  | AM+K_in_group     |
| Medtr8g087425 | glutathione S-transferase         | AM+K_not_in_group |
| Medtr5g086130 | LysM receptor kinase K1B          | AM+K_not_in_group |
| Medtr7g102940 | pectate lyase-like protein        | AM+K_not_in_group |
| Medtr3g074520 | myb transcription factor          | AM+K_not_in_group |
| Medtr7g066620 | LRR receptor-like kinase          | AM+K_not_in_group |
| Medtr2g090270 | expansin-like protein B1          | AM+K_not_in_group |
| Medtr2g102030 | ivity in the MVB pathway protein  | AM+K_not_in_group |
| Medtr3g464370 | inding lectin superfamily protein | AM+K_not_in_group |
| Medtr7g089860 | VQ motif protein                  | AM+K_not_in_group |
| Medtr4g068290 | CSL zinc finger protein, putative | AM+K_in_group     |
| Medtr1g085750 | responsive AUX/IAA family protein | AM+K_not_in_group |
| Medtr1g021330 | B3-DNA-binding domain protein     | AM+K_not_in_group |
| Medtr2g099670 | casein kinase I-like protein      | AM+K_not_in_group |
| Medtr1g073170 | myb transcription factor          | AM+K_not_in_group |
| Medtr8g041710 | ysteine-rich receptor-like kinase | AM+K_not_in_group |
| Medtr5g005370 | l 1,3,4-trisphosphate 5/6-kinase  | AM+K_not_in_group |
| Medtr7g104330 | hosphatase superfamily protein    | AM+K_not_in_group |
| Medtr1g007840 | ransmembrane protein, putative    | AM+K_not_in_group |
| Medtr2g014240 | ed/dormancy-associated protein    | AM+K_not_in_group |
| Medtr4g093840 | nthase/flavanone 3-hydroxylase    | AM+K_not_in_group |
| Medtr7g102110 | myb transcription factor          | AM+K_not_in_group |
| Medtr7g109600 | NRKY family transcription factor  | AM+K_not_in_group |
| Medtr5g008070 | aspartyl protease family protein  | AM+K_not_in_group |
| Medtr8g074730 | calmodulin-binding motif protein  | AM+K_not_in_group |
| Medtr2g011180 | tor-like Serine/Threonine-kinase  | AM+K_not_in_group |
| Medtr5g010330 | notif DNA-binding family protein  | AM+K_not_in_group |
| Medtr7g065150 | plant/T7H20-70 protein            | AM+K_not_in_group |

## diffusion\_prioritization\_ALL

|                |                                                 |                   |
|----------------|-------------------------------------------------|-------------------|
| Medtr5g005520  | rich receptor-kinase-like protein               | AM+K_not_in_group |
| Medtr4g103250  | nic acid-binding protein, putative              | AM+K_not_in_group |
| Medtr3g073670  | detoxification superfamily protein              | AM+K_not_in_group |
| Medtr7g074880  | flavonol 4-reductase-like protein               | AM+K_not_in_group |
| Medtr2g022820  | hypothetical protein                            | AM+K_not_in_group |
| Medtr5g017110  | MAP3K-like kinase                               | AM+K_not_in_group |
| Medtr2g039410  | lase/dehydrogenase-like protein                 | AM+K_not_in_group |
| Medtr6g091680  | acyl-CoA 3-O-methyltransferase                  | AM+K_in_group     |
| Medtr3g113050  | associated (FHA) domain protein                 | AM+K_not_in_group |
| Medtr4g122260  | inducible Ca <sup>2+</sup> -binding protein     | AM+K_not_in_group |
| Medtr5g040340  | kinase substrate protein, putative              | AM+K_not_in_group |
| Medtr2g100270  | of RAB acceptor) family protein                 | AM+K_not_in_group |
| Medtr7g092930  | as a promoter-binding-like protein              | AM+K_not_in_group |
| Medtr7g104480  | response element-binding factor                 | AM+K_not_in_group |
| Medtr0154s0020 | MAP3K-like kinase                               | AM+K_not_in_group |
| Medtr5g019010  | cytochrome P450 family 71 protein               | AM+K_not_in_group |
| Medtr8g015150  | phosphatase-like kinase plant-like protein      | AM+K_not_in_group |
| Medtr5g091310  | transmembrane protein, putative                 | AM+K_not_in_group |
| Medtr5g094120  | cell division FtsZ-like protein                 | AM+K_not_in_group |
| Medtr7g080290  | long chain carrier acetyl-CoA carboxylase       | AM+K_not_in_group |
| Medtr0027s0230 | class I small heat shock protein                | AM+K_not_in_group |
| Medtr1g090683  | DUF594 family protein                           | AM+K_not_in_group |
| Medtr4g013350  | chitinase resistance response protein           | AM+K_not_in_group |
| Medtr5g096855  | hypothetical protein                            | AM+K_not_in_group |
| Medtr8g064530  | chitinase non-catalytic protein                 | AM+K_not_in_group |
| Medtr7g091990  | carboxy-terminal region remorin                 | AM+K_not_in_group |
| Medtr7g113680  | early transcription factor Y protein            | AM+K_not_in_group |
| Medtr2g022900  | 10 kDa class V heat shock protein               | AM+K_not_in_group |
| Medtr4g098460  | transcription factor DNA-binding family protein | AM+K_not_in_group |
| Medtr8g005750  | WRKY transcription factor                       | AM+K_not_in_group |
| Medtr1g034290  | hypothetical protein                            | AM+K_not_in_group |
| Medtr1g114690  | protein/ABA-responsive-like protein             | AM+K_not_in_group |
| Medtr2g020040  | zinc finger RING-type zinc finger protein       | AM+K_not_in_group |
| Medtr2g022460  | aspartyl protease family protein                | AM+K_not_in_group |
| Medtr4g080790  | transferrin flavoprotein subunit alpha          | AM+K_not_in_group |
| Medtr5g066060  | carbonic anhydrase family protein               | AM+K_not_in_group |
| Medtr3g109320  | calcium-binding family protein                  | AM+K_not_in_group |
| Medtr7g039110  | transcription factor                            | AM+K_not_in_group |
| Medtr4g060480  | acyl-CoA dehydrogenase                          | AM+K_not_in_group |
| Medtr3g095570  | autophagy-related protein                       | AM+K_not_in_group |
| Medtr4g098500  | LSD1-type zinc finger protein                   | AM+K_not_in_group |
| Medtr5g019040  | Nod-factor receptor 5, putative                 | AM+K_not_in_group |
| Medtr6g463460  | tyrosine kinase family protein                  | AM+K_not_in_group |
| Medtr7g116650  | tyrosine kinase family protein                  | AM+K_not_in_group |
| Medtr3g096920  | NAC-like transcription factor                   | AM+K_not_in_group |
| Medtr6g037610  | transcription factor (other strand read)        | AM+K_not_in_group |
| Medtr3g026250  | Threonine kinase family protein                 | AM+K_not_in_group |
| Medtr3g081130  | seed linoleate 9S-lipoxygenase                  | AM+K_not_in_group |
| Medtr8g018735  | seed linoleate 9S-lipoxygenase                  | AM+K_not_in_group |
| Medtr2g030380  | receptor-like kinase family protein             | AM+K_not_in_group |
| Medtr1g017950  | transcription factor family protein             | AM+K_not_in_group |

## diffusion\_prioritization\_ALL

|               |                                     |                   |
|---------------|-------------------------------------|-------------------|
| Medtr2g013550 | tein ligase RMA1H1-like protein     | AM+K_not_in_group |
| Medtr1g022420 | ornithine carbamoyltransferase      | AM+K_not_in_group |
| Medtr1g088860 | ear transcription factor Y protein  | AM+K_not_in_group |
| Medtr1g116890 | cytochrome P450 family protein      | AM+K_not_in_group |
| Medtr2g008470 | affinity sulfate transporter type 1 | AM+K_not_in_group |
| Medtr3g029510 | MATE efflux family protein          | AM+K_not_in_group |
| Medtr3g109490 | tration-responsive protein RD22     | AM+K_not_in_group |
| Medtr3g116270 | BURP domain protein                 | AM+K_not_in_group |
| Medtr3g463760 | non-specific phospholipase C4       | AM+K_not_in_group |
| Medtr3g010330 | acyl hydrolase family 9 protein     | AM+K_not_in_group |
| Medtr1g022040 | chrome P450 family 709 protein      | AM+K_not_in_group |
| Medtr1g061530 | otif DNA-binding family protein     | AM+K_not_in_group |
| Medtr7g038910 | o acid transporter family protein   | AM+K_not_in_group |
| Medtr7g116610 | hypothetical protein                | AM+K_not_in_group |
| Medtr4g039720 | DUF642 family protein               | AM+K_not_in_group |
| Medtr7g052020 | LK (receptor-like kinase) protein   | AM+K_not_in_group |
| Medtr2g099490 | AAT-binding transcription factor    | AM+K_not_in_group |
| Medtr3g069290 | hypothetical protein                | AM+K_not_in_group |
| Medtr4g119840 | alanyl-tRNA synthetase              | AM+K_not_in_group |
| Medtr5g011120 | nce-inducible stay-green protein    | AM+K_not_in_group |
| Medtr1g103070 | calmodulin-binding motif protein    | AM+K_not_in_group |
| Medtr1g027070 | ress-induced receptor-like kinase   | AM+K_not_in_group |
| Medtr5g032720 | MATE efflux family protein          | AM+K_not_in_group |
| Medtr4g095330 | nesis abundant protein, group 6     | AM+K_not_in_group |
| Medtr3g072610 | omain class transcription factor    | AM+K_not_in_group |
| Medtr8g467340 | ox domain, ZF-HD class protein      | AM+K_not_in_group |
| Medtr8g104190 | zinc finger constans-like protein   | AM+K_not_in_group |
| Medtr2g096530 | alpha-galactosidase                 | AM+K_not_in_group |
| Medtr6g018770 | DUF4378 domain protein              | AM+K_not_in_group |
| Medtr7g082220 | DUF4378 domain protein              | AM+K_not_in_group |
| Medtr3g013500 | sulfotransferase                    | AM+K_not_in_group |
| Medtr6g472100 | hypothetical protein                | AM+K_not_in_group |
| Medtr3g069410 | zinc ion-binding protein            | AM+K_not_in_group |
| Medtr3g064350 | hypothetical protein                | AM+K_not_in_group |
| Medtr1g110290 | core-2/l-branching enzyme           | AM+K_not_in_group |
| Medtr4g094932 | F-box protein SKIP2                 | AM+K_not_in_group |
| Medtr5g082830 | at CCCH-type zinc finger protein    | AM+K_not_in_group |
| Medtr5g091130 | aspartyl protease family protein    | AM+K_not_in_group |
| Medtr6g472110 | DUF1262 family protein              | AM+K_not_in_group |
| Medtr2g090900 | bZIP family transcription factor    | AM+K_not_in_group |
| Medtr4g097570 | myb transcription factor            | AM+K_not_in_group |
| Medtr1g028560 | omain class transcription factor    | AM+K_in_group     |
| Medtr8g106900 | lutaredoxin (GRX) family protein    | AM+K_not_in_group |
| Medtr4g134490 | UDP-glucose 4-epimerase             | AM+K_not_in_group |
| Medtr7g114860 | ike DNA-binding domain protein      | AM+K_not_in_group |
| Medtr2g054380 | main TIGR01570 family protein       | AM+K_not_in_group |
| Medtr1g043190 | ryptochrome 2B apoprotein           | AM+K_not_in_group |
| Medtr4g131330 | orter, ATP-binding protein CcmA     | AM+K_not_in_group |
| Medtr5g008810 | cycloartenol synthase               | AM+K_not_in_group |
| Medtr4g063930 | kinase 1B                           | AM+K_not_in_group |
| Medtr3g062540 | root phototropism-like protein      | AM+K_not_in_group |

diffusion\_prioritization\_ALL

|                |                                          |                   |
|----------------|------------------------------------------|-------------------|
| Medtr1g015020  | kinase 1B                                | AM+K_not_in_group |
| Medtr1g043080  | related transcription factor LBM1        | AM+K_not_in_group |
| Medtr1g095540  | carboxypeptidase-like protein            | AM+K_not_in_group |
| Medtr2g020370  | transmembrane protein, putative          | AM+K_not_in_group |
| Medtr7g085810  | homeobox class transcription factor      | AM+K_in_group     |
| Medtr4g100630  | transcription factor family protein      | AM+K_not_in_group |
| Medtr1g012550  | Serine/Threonine-kinase SD2-5            | AM+K_not_in_group |
| Medtr1g089600  | protein-like kinase in flowers protein   | AM+K_not_in_group |
| Medtr2g059540  | Dof domain zinc finger protein           | AM+K_not_in_group |
| Medtr2g043050  | transcription factor ERF017-like protein | AM+K_not_in_group |
| Medtr4g133660  | GRAS family transcription factor         | AM+K_not_in_group |
| Medtr5g071550  | kinase family, 2C domain protein         | AM+K_not_in_group |
| Medtr1g100647  | carboxy-terminal region remorin          | AM+K_not_in_group |
| Medtr2g011820  | serine kinase/diacylglycerol kinase      | AM+K_not_in_group |
| Medtr3g060280  | cellulose synthase E1-like protein       | AM+K_not_in_group |
| Medtr3g116830  | alpha hydrolase superfamily protein      | AM+K_not_in_group |
| Medtr8g086270  | general regulatory factor 2              | AM+K_not_in_group |
| Medtr0002s0020 | F-box protein PP2-A13                    | AM+K_not_in_group |
| Medtr3g110660  | oxo acid transporter family protein      | AM+K_not_in_group |
| Medtr5g066490  | ethylene-responsive kinase Le-CTR1       | AM+K_not_in_group |
| Medtr7g103560  | transacting factor-like phosphatase      | AM+K_not_in_group |
| Medtr5g068770  | ase, putative (other strand read)        | AM+K_not_in_group |
| Medtr1g093800  | gene family member MtCLE18               | AM+K_not_in_group |
| Medtr0003s0580 | BPS1, putative                           | AM+K_not_in_group |
| Medtr1g022485  | basal defense response protein           | AM+K_not_in_group |
| Medtr1g057290  | transmembrane protein, putative          | AM+K_not_in_group |
| Medtr5g009500  | substrate carrier family protein         | AM+K_not_in_group |
| Medtr8g019320  | heme oxygenase 1 protein                 | AM+K_not_in_group |
| Medtr4g124920  | invasive A/B barrel domain protein       | AM+K_not_in_group |
| Medtr0258s0040 | ELMO/CED-12 family protein               | AM+K_not_in_group |
| Medtr1g069605  | cellulose synthase-like protein          | AM+K_not_in_group |
| Medtr1g095850  | boundaries (LOB) domain protein          | AM+K_not_in_group |
| Medtr2g093970  | fasciclin domain protein                 | AM+K_not_in_group |
| Medtr2g096040  | glycosylase hydrolase family 18 protein  | AM+K_not_in_group |
| Medtr3g060900  | kinesin heavy chain                      | AM+K_not_in_group |
| Medtr3g073480  | hypothetical protein                     | AM+K_not_in_group |
| Medtr3g089035  | basic blue-like protein                  | AM+K_not_in_group |
| Medtr3g102600  | WIPK component response regulator        | AM+K_not_in_group |
| Medtr4g059780  | fasciclin domain protein                 | AM+K_not_in_group |
| Medtr4g059790  | cellulose-like arabinogalactan protein   | AM+K_not_in_group |
| Medtr4g081130  | thiazole biosynthetic enzyme             | AM+K_not_in_group |
| Medtr5g006370  | glyoxalase I family protein              | AM+K_not_in_group |
| Medtr5g040600  | transmembrane protein, putative          | AM+K_not_in_group |
| Medtr5g067320  | transmembrane protein, putative          | AM+K_not_in_group |
| Medtr6g008480  | matrix metalloproteinase                 | AM+K_not_in_group |
| Medtr7g093370  | peroxidase family protein                | AM+K_not_in_group |
| Medtr3g020780  | cytochrome P450 family protein           | AM+K_in_group     |
| Medtr6g016375  | BZIP transcription factor                | AM+K_not_in_group |
| Medtr7g082530  | kinase associated kinase-like protein    | AM+K_not_in_group |
| Medtr2g436100  | RING-H2 zinc finger protein              | AM+K_not_in_group |
| Medtr2g436900  | C2 domain protein                        | AM+K_not_in_group |



## diffusion\_prioritization\_ALL

|               |                                    |                   |
|---------------|------------------------------------|-------------------|
| Medtr8g075150 | plementing activity-like protein   | AM+K_not_in_group |
| Medtr4g130210 | LRR receptor-like kinase           | AM+K_not_in_group |
| Medtr2g450720 | ile alpha motif) protein, putative | AM+K_not_in_group |
| Medtr2g090010 | DUF3774 domain protein             | AM+K_not_in_group |
| Medtr3g072800 | tor-like Serine/Threonine-kinase   | AM+K_not_in_group |
| Medtr1g016430 | calcineurin B-like protein 4-1     | AM+K_not_in_group |
| Medtr1g041300 | in sialophosphoprotein, putative   | AM+K_not_in_group |
| Medtr1g070520 | ponsive AUX/IAA family protein     | AM+K_not_in_group |
| Medtr1g080860 | ponsive AUX/IAA family protein     | AM+K_not_in_group |
| Medtr1g085120 | ox/RNI/FBD-like domain protein     | AM+K_not_in_group |
| Medtr2g435340 | ycoside hydrolase family protein   | AM+K_not_in_group |
| Medtr3g010770 | asterase/pectinesterase inhibitor  | AM+K_not_in_group |
| Medtr4g072910 | auxin-responsive family protein    | AM+K_not_in_group |
| Medtr4g116070 | 3 amino-terminal domain protein    | AM+K_not_in_group |
| Medtr6g008170 | dillo/beta-catenin repeat protein  | AM+K_not_in_group |
| Medtr6g090280 | gamma-glutamyltranspeptidase       | AM+K_not_in_group |
| Medtr7g084760 | osylase/hydrolase family protein   | AM+K_not_in_group |
| Medtr8g021237 | hypothetical protein               | AM+K_not_in_group |
| Medtr8g081040 | osylase/hydrolase family protein   | AM+K_not_in_group |
| Medtr3g106850 | ponsive AUX/IAA family protein     | AM+K_not_in_group |
| Medtr4g125260 | receptor-like kinase               | AM+K_not_in_group |
| Medtr1g110980 | alpha-glucosidase                  | AM+K_not_in_group |
| Medtr5g014100 | nonic peroxidase swpb3 protein     | AM+K_not_in_group |
| Medtr5g070010 | ependent fatty acid hydroxylase    | AM+K_not_in_group |
| Medtr8g089300 | ASP POPTRDRAFT-like protein        | AM+K_not_in_group |
| Medtr7g089910 | o acid transporter family protein  | AM+K_not_in_group |
| Medtr5g041350 | ranscription factor family protein | AM+K_not_in_group |
| Medtr1g023605 | hypothetical protein               | AM+K_not_in_group |
| Medtr4g105630 | plastid phosphate translocator     | AM+K_not_in_group |
| Medtr5g014090 | ,5-trisphosphate 5-phosphatase     | AM+K_not_in_group |
| Medtr4g073230 | receptor-like kinase               | AM+K_not_in_group |
| Medtr4g011690 | utarate-dependent dioxygenase      | AM+K_not_in_group |
| Medtr8g075340 | osmosensor histidine kinase        | AM+K_not_in_group |
| Medtr1g105700 | rich receptor-kinase-like protein  | AM+K_not_in_group |
| Medtr7g112440 | ated receptor kinase-like protein  | AM+K_not_in_group |
| Medtr8g468210 | eucine zipper ATHB-like protein    | AM+K_not_in_group |
| Medtr1g077030 | ioxygenase extradiol-like protein  | AM+K_not_in_group |
| Medtr1g078000 | ound starch synthase I, putative   | AM+K_not_in_group |
| Medtr2g013140 | stem-specific TSJT1-like protein   | AM+K_not_in_group |
| Medtr2g039890 | hypothetical protein               | AM+K_not_in_group |
| Medtr2g045280 | idylate deaminase family protein   | AM+K_not_in_group |
| Medtr2g099630 | DUF3511 domain protein             | AM+K_not_in_group |
| Medtr3g103960 | inc finger CCCH domain protein     | AM+K_not_in_group |
| Medtr4g052460 | F-box plant-like protein           | AM+K_not_in_group |
| Medtr4g106860 | berellin-regulated family protein  | AM+K_not_in_group |
| Medtr1g105290 | MAP kinase kinase kinase           | AM+K_not_in_group |
| Medtr4g085990 | hypothetical protein               | AM+K_not_in_group |
| Medtr8g102150 | myo-inositol oxygenase             | AM+K_not_in_group |
| Medtr4g069970 | receptor-like kinase               | AM+K_not_in_group |
| Medtr5g033490 | LysM type receptor kinase          | AM+K_not_in_group |
| Medtr5g083480 | LRR receptor-like kinase           | AM+K_not_in_group |

diffusion\_prioritization\_ALL

|                |                                               |                   |
|----------------|-----------------------------------------------|-------------------|
| Medtr2g078210  | calmodulin-binding protein                    | AM+K_not_in_group |
| Medtr7g015800  | tyrosine kinase family protein                | AM+K_not_in_group |
| Medtr8g089975  | tyrosine-kinase SAPK1-like protein            | AM+K_not_in_group |
| Medtr5g038280  | box leucine zipper family protein             | AM+K_not_in_group |
| Medtr2g029910  | peroxidase family protein                     | AM+K_not_in_group |
| Medtr5g068820  | phosphatase/phosphatase family protein        | AM+K_not_in_group |
| Medtr3g110405  | tyrosine-kinase aurora-like protein           | AM+K_not_in_group |
| Medtr6g055230  | TraB family protein                           | AM+K_not_in_group |
| Medtr1g062590  | allergen Pru protein, putative                | AM+K_in_group     |
| Medtr2g084280  | transcription factor                          | AM+K_not_in_group |
| Medtr8g107300  | jasmonate zim-domain protein                  | AM+K_not_in_group |
| Medtr3g083920  | stilbene synthase family protein              | AM+K_not_in_group |
| Medtr4g124360  | divergent CCT motif protein                   | AM+K_not_in_group |
| Medtr5g096840  | oxo acid transporter family protein           | AM+K_not_in_group |
| Medtr7g090410  | transcription factor, putative                | AM+K_not_in_group |
| Medtr5g092120  | receptor Serine/Threonine kinase              | AM+K_not_in_group |
| Medtr4g056470  | eukaryotic translation initiation factor 2c   | AM+K_not_in_group |
| Medtr4g415300  | protein (MIP) family transporter              | AM+K_not_in_group |
| Medtr8g009300  | pectin methylesterase inhibitor               | AM+K_not_in_group |
| Medtr8g009880  | auxin-responsive family protein               | AM+K_not_in_group |
| Medtr8g066040  | N <sup>6</sup> -3-methyladenine glycosylase I | AM+K_not_in_group |
| Medtr8g069925  | antisense protein (other strand read)         | AM+K_not_in_group |
| Medtr5g006530  | TSO1-like CXC domain protein                  | AM+K_not_in_group |
| Medtr1g017500  | hypothetical protein                          | AM+K_not_in_group |
| Medtr1g110120  | small associated kinase-like protein          | AM+K_not_in_group |
| Medtr7g117200  | WRKY family transcription factor              | AM+K_not_in_group |
| Medtr3g072110  | oxo acid transporter family protein           | AM+K_not_in_group |
| Medtr8g103820  | metoxification superfamily protein            | AM+K_not_in_group |
| Medtr6g008210  | domain stress-associated protein              | AM+K_not_in_group |
| Medtr3g052850  | phosphate synthase subunit HisF               | AM+K_not_in_group |
| Medtr3g461480  | oxo acid transporter family protein           | AM+K_not_in_group |
| Medtr5g091900  | transmembrane protein, putative               | AM+K_not_in_group |
| Medtr6g023190  | hypothetical protein                          | AM+K_not_in_group |
| Medtr7g086340  | dehydrin                                      | AM+K_not_in_group |
| Medtr7g111380  | indolene salt responsive family protein       | AM+K_not_in_group |
| Medtr0019s0160 | RNA-directed RNA polymerase I, II             | AM+K_not_in_group |
| Medtr2g094410  | senescence regulator                          | AM+K_not_in_group |
| Medtr2g062660  | myosin family XI heavy chain                  | AM+K_not_in_group |
| Medtr4g478180  | myb transcription factor                      | AM+K_not_in_group |
| Medtr4g016940  | lipase-like acyl-esterase family protein      | AM+K_not_in_group |
| Medtr6g088475  | malic acid dehydratase and lipid transporter  | AM+K_not_in_group |
| Medtr5g037080  | transcription factor family protein           | AM+K_not_in_group |
| Medtr2g007220  | W-box plant-like protein                      | AM+K_not_in_group |
| Medtr7g070940  | acyltransferase family protein                | AM+K_not_in_group |
| Medtr1g019360  | cold regulated protein, putative              | AM+K_not_in_group |
| Medtr4g060890  | hypothetical protein                          | AM+K_in_group     |
| Medtr8g461330  | plant gibberellin 2-oxidase                   | AM+K_not_in_group |
| Medtr5g005530  | cysteine-rich receptor-like kinase            | AM+K_not_in_group |
| Medtr5g069980  | hypothetical protein                          | AM+K_not_in_group |
| Medtr4g126270  | chitinase ALE2-like protein, putative         | AM+K_not_in_group |
| Medtr4g029710  | LRR receptor-like kinase                      | AM+K_not_in_group |

diffusion\_prioritization\_ALL

|                 |                                    |                   |
|-----------------|------------------------------------|-------------------|
| Medtr1g082920   | kinesin motor domain protein       | AM+K_not_in_group |
| Medtr5g098710   | hypothetical protein               | AM+K_not_in_group |
| Medtr4g122270   | licensing factor MCM2, putative    | AM+K_not_in_group |
| Medtr8g090000   | ance (MCM2/3/5) family protein     | AM+K_not_in_group |
| Medtr1g050505   | yst complex component sec15B       | AM+K_not_in_group |
| Medtr1g115220   | mobility group (HMG)-box protein   | AM+K_not_in_group |
| Medtr5g029620   | ransmembrane protein, putative     | AM+K_not_in_group |
| Medtr1g093240   | responsive AUX/IAA family protein  | AM+K_not_in_group |
| Medtr3g099700   | MATE efflux family protein         | AM+K_not_in_group |
| Medtr6g012830   | DUF1997 family protein             | AM+K_not_in_group |
| Medtr6g023910   | ort-chain alcohol dehydrogenase    | AM+K_not_in_group |
| Medtr7g112620   | epoxide hydrolase                  | AM+K_not_in_group |
| Medtr8g059170_s | r-like protein (other strand read) | AM+K_not_in_group |
| Medtr4g132390   | F-box plant-like protein, putative | AM+K_not_in_group |
| Medtr5g007230   | ranscription factor family protein | AM+K_not_in_group |
| Medtr4g080100   | phospholipase A1                   | AM+K_not_in_group |
| Medtr8g012775   | Defensin-like protein              | AM+K_not_in_group |
| Medtr2g008030   | osphatase, cytosolic-like protein  | AM+K_not_in_group |
| Medtr3g077590   | ilate phosphoribosyltransferase    | AM+K_not_in_group |
| Medtr4g081510   | l/RBD/RNP motif) family protein    | AM+K_not_in_group |
| Medtr8g068830   | matase hydrolase family protein    | AM+K_not_in_group |
| Medtr7g017380   | ransmembrane protein, putative     | AM+K_not_in_group |
| Medtr3g011910   | rich receptor-kinase-like protein  | AM+K_not_in_group |
| Medtr8g024560   | -1,4-lactone oxidase-like protein  | AM+K_not_in_group |
| Medtr8g442270   | LK (receptor-like kinase) protein  | AM+K_not_in_group |
| Medtr4g070970   | ceptor-like kinase family protein  | AM+K_not_in_group |
| Medtr1g045065   | ited protein 2/3 complex, protein  | AM+K_not_in_group |
| Medtr2g090735   | transcription factor-like protein  | AM+K_not_in_group |
| Medtr8g098860   | myb transcription factor           | AM+K_not_in_group |
| Medtr8g463790   | -like acyl-esterase family protein | AM+K_not_in_group |
| Medtr3g055970   | tornado protein                    | AM+K_not_in_group |
| Medtr6g406250   | cinnamoyl-CoA reductase            | AM+K_not_in_group |
| Medtr5g099060   | nodule inception protein           | AM+K_not_in_group |
| Medtr5g029750   | transporter B family-like protein  | AM+K_not_in_group |
| Medtr8g079560   | menting 1(SNF1)-related kinase     | AM+K_not_in_group |
| Medtr5g081740   | acid phosphatase-like protein      | AM+K_not_in_group |
| Medtr1g018810   | transcription factor-like protein  | AM+K_not_in_group |
| Medtr3g030540   | polygalacturonase                  | AM+K_not_in_group |
| Medtr4g103840   | hypothetical protein               | AM+K_not_in_group |
| Medtr3g096960   | cyclin-dependent kinase            | AM+K_not_in_group |
| Medtr7g024500   | oflavone-7-O-methyltransferase     | AM+K_not_in_group |
| Medtr3g088415   | carboxy-terminal domain cyclin     | AM+K_not_in_group |
| Medtr8g006870   | /Threonine kinase family protein   | AM+K_not_in_group |
| Medtr8g466250   | alcium-binding EF-hand protein     | AM+K_not_in_group |
| Medtr1g100627   | hypothetical protein               | AM+K_not_in_group |
| Medtr5g098800   | coproporphyrinogen III oxidase     | AM+K_not_in_group |
| Medtr6g087680   | ABIL1-like protein                 | AM+K_not_in_group |
| Medtr7g100830   | protamine P1 family protein        | AM+K_not_in_group |
| Medtr5g023210   | gent CRAL/TRIO domain protein      | AM+K_not_in_group |
| Medtr1g023340   | alpha/beta fold hydrolase          | AM+K_not_in_group |
| Medtr0002s1060  | side hydrolase family 18 protein   | AM+K_not_in_group |

diffusion\_prioritization\_ALL

|                |                                    |                   |
|----------------|------------------------------------|-------------------|
| Medtr2g083940  | shaggy-like kinase dzeta           | AM+K_not_in_group |
| Medtr1g052125  | transmembrane protein, putative    | AM+K_not_in_group |
| Medtr7g071120  | WRKY transcription factor          | AM+K_not_in_group |
| Medtr7g109290  | DUF3511 domain protein             | AM+K_not_in_group |
| Medtr5g068770  | tin-like receptor kinase, putative | AM+K_not_in_group |
| Medtr8g468570  | whirly transcription factor        | AM+K_not_in_group |
| Medtr4g129650  | MA-like transporter family protein | AM+K_not_in_group |
| Medtr8g079472  | chaperone DnaJ-domain protein      | AM+K_not_in_group |
| Medtr1g085140  | rhicadhesin receptor               | AM+K_not_in_group |
| Medtr2g082650  | family GT8 glycosyltransferase     | AM+K_not_in_group |
| Medtr4g094895  | saccharide biosynthesis protein    | AM+K_not_in_group |
| Medtr5g064890  | RING-H2 zinc finger protein        | AM+K_not_in_group |
| Medtr4g415390  | ProtKB/Swiss-Prot;Acc:Q8L884]      | AM+K_not_in_group |
| Medtr1g102360  | e Serine/Threonine-kinase plant    | AM+K_not_in_group |
| Medtr4g007300  | chaperone DnaJ domain protein      | AM+K_not_in_group |
| Medtr4g130970  | til tetramerization domain protein | AM+K_not_in_group |
| Medtr5g010800  | F-box protein PP2-A13              | AM+K_not_in_group |
| Medtr7g089140  | tion factor (TFIIS) family protein | AM+K_not_in_group |
| Medtr8g075780  | chaperone DnaJ domain protein      | AM+K_not_in_group |
| Medtr0053s0030 | inone biosynthesis protein UbiB    | AM+K_not_in_group |
| Medtr2g079850  | CP1-interacting protein, putative  | AM+K_not_in_group |
| Medtr5g021820  | auxin-responsive family protein    | AM+K_not_in_group |
| Medtr6g012220  | rotein dimerization region protein | AM+K_not_in_group |
| Medtr4g095600  | oundaries (LOB) domain protein     | AM+K_not_in_group |
| Medtr6g033255  | omain class transcription factor   | AM+K_not_in_group |
| Medtr3g070860  | yanidin dioxygenase-like protein   | AM+K_not_in_group |
| Medtr4g124960  | jasmonate zim-domain protein       | AM+K_not_in_group |
| Medtr5g013520  | jasmonate zim-domain protein       | AM+K_not_in_group |
| Medtr6g012380  | granule bound starch synthase      | AM+K_not_in_group |
| Medtr7g090630  | ydration-induced protein ERD15     | AM+K_not_in_group |
| Medtr8g021380  | jasmonate zim-domain protein       | AM+K_not_in_group |
| Medtr2g081580  | alcium-binding EF-hand protein     | AM+K_not_in_group |
| Medtr3g094630  | eradish peroxidase-like protein    | AM+K_in_group     |
| Medtr4g125930  | U-box kinase family protein        | AM+K_not_in_group |
| Medtr2g006910  | LK (receptor-like kinase) protein  | AM+K_not_in_group |
| Medtr3g070165  | C2 domain protein                  | AM+K_not_in_group |
| Medtr4g121600  | gase AAE7, peroxisomal protein     | AM+K_not_in_group |
| Medtr4g032815  | roteinase inhibitor family protein | AM+K_not_in_group |
| Medtr4g084560  | oA dioxygenase domain protein      | AM+K_not_in_group |
| Medtr5g045710  | ol dehydrogenase family protein    | AM+K_not_in_group |
| Medtr7g110720  | WRKY1b transcription factor        | AM+K_not_in_group |
| Medtr1g031650  | rg (CaLB domain) family protein    | AM+K_not_in_group |
| Medtr3g067685  | idillo/beta-catenin repeat protein | AM+K_not_in_group |
| Medtr3g068125  | erring glycosyl group transferase  | AM+K_not_in_group |
| Medtr3g099010  | TB2/DP1, HVA22 family protein      | AM+K_not_in_group |
| Medtr6g004880  | nthase or seed inhibition protein  | AM+K_not_in_group |
| Medtr6g007070  | L-aspartate oxidase                | AM+K_not_in_group |
| Medtr1g075610  | cyclin-dependent kinase            | AM+K_not_in_group |
| Medtr5g066320  | ciated kinesin KIF4A-like protein  | AM+K_not_in_group |
| Medtr6g033330  | ismembrane MLO family protein      | AM+K_not_in_group |
| Medtr7g117475  | phospholipid methyltransferase     | AM+K_not_in_group |

## diffusion\_prioritization\_ALL

|                                                  |                   |
|--------------------------------------------------|-------------------|
| Medtr5g010635-related thaumatin family protein   | AM+K_not_in_group |
| Medtr2g098250 ceptor-like kinase family protein  | AM+K_not_in_group |
| Medtr2g100290 ha hydrolase-like domain kinase    | AM+K_not_in_group |
| Medtr4g081110 ain of gyp1p superfamily protein   | AM+K_not_in_group |
| Medtr2g040510 MAP kinase kinase                  | AM+K_not_in_group |
| Medtr1g022495 ZIP transcription factor bZIP124   | AM+K_not_in_group |
| Medtr3g067510 albumin I                          | AM+K_in_group     |
| Medtr7g056393 xygenase family oxidoreductase     | AM+K_not_in_group |
| Medtr8g069785 hypothetical protein               | AM+K_not_in_group |
| Medtr3g069080 rroline-5-carboxylate synthetase   | AM+K_not_in_group |
| Medtr4g123950 group 3 LEA protein                | AM+K_not_in_group |
| Medtr7g053410 BHLH transcription factor          | AM+K_not_in_group |
| Medtr3g118020 plant phospholipase-like protein   | AM+K_not_in_group |
| Medtr1g072690 loglycan-binding domain protein    | AM+K_not_in_group |
| Medtr1g079870 hypothetical protein               | AM+K_not_in_group |
| Medtr3g069280 nositol-specific phospholipase C   | AM+K_not_in_group |
| Medtr3g112160 wound-responsive family protein    | AM+K_not_in_group |
| Medtr4g059320 senescence regulator               | AM+K_not_in_group |
| Medtr4g072110 yrophosphate amidotransferase      | AM+K_not_in_group |
| Medtr4g076090 ransmembrane protein, putative     | AM+K_not_in_group |
| Medtr5g092080 lipocalin-like domain protein      | AM+K_not_in_group |
| Medtr7g067000 ransmembrane protein, putative     | AM+K_not_in_group |
| Medtr7g093490 thioredoxin                        | AM+K_not_in_group |
| Medtr7g105780 ovate transcriptional repressor    | AM+K_not_in_group |
| Medtr8g028425 DUF2358 family protein             | AM+K_not_in_group |
| Medtr8g080980 isomerase FKBP62-like protein      | AM+K_not_in_group |
| Medtr2g040060 lycopene epsilon cyclase           | AM+K_not_in_group |
| Medtr3g094000 RING-H2 zinc finger protein        | AM+K_not_in_group |
| Medtr4g052970 iside hydrolase family 17 protein  | AM+K_not_in_group |
| Medtr4g109980 Dof domain zinc finger protein     | AM+K_not_in_group |
| Medtr6g092940 gh-affinity potassium transporter  | AM+K_not_in_group |
| Medtr7g010100 RNA recognition motif              | AM+K_not_in_group |
| Medtr8g012570 GTP cyclohydrolase I 1             | AM+K_not_in_group |
| Medtr4g014350 ceptor-like kinase family protein  | AM+K_not_in_group |
| Medtr3g435480 nger DNA-binding family protein    | AM+K_not_in_group |
| Medtr8g107010 ptydyl-prolyl cis-trans isomerase  | AM+K_not_in_group |
| Medtr8g463760 malate dehydrogenase               | AM+K_not_in_group |
| Medtr4g116300 ranscription factor family protein | AM+K_not_in_group |
| Medtr5g094700 n CCCH-type zinc finger protein    | AM+K_not_in_group |
| Medtr4g074960 endo-1,4-beta-glucanase            | AM+K_not_in_group |
| Medtr3g080870 e transporter OPT family protein   | AM+K_not_in_group |
| Medtr4g029390 Lipid transfer protein             | AM+K_not_in_group |
| Medtr0009s0230 A-3-methyladenine glycosylase I   | AM+K_not_in_group |
| Medtr4g010340 auxin-binding protein ABP19a       | AM+K_not_in_group |
| Medtr4g015120 /diphenol oxidase family protein   | AM+K_not_in_group |
| Medtr4g058860 /sugar transporter family protein  | AM+K_not_in_group |
| Medtr5g022770 bunit 11 RING-H2 finger protein    | AM+K_not_in_group |
| Medtr5g083260 chome birefringence-like protein   | AM+K_not_in_group |
| Medtr7g015960 COBRA-like protein 2 precursor     | AM+K_not_in_group |
| Medtr7g079870 P-interactive CRIB motif protein   | AM+K_not_in_group |
| Medtr7g101080 clin-like arabinogalactan protein  | AM+K_not_in_group |

## diffusion\_prioritization\_ALL

|                                                    |                   |
|----------------------------------------------------|-------------------|
| Medtr8g065030 pectin lyase superfamily protein     | AM+K_not_in_group |
| Medtr1g111350 ise in GUARD CELL-like protein       | AM+K_not_in_group |
| Medtr3g095910 n alpha-glucuronosyltransferase      | AM+K_not_in_group |
| Medtr6g090470 MAP kinase kinase                    | AM+K_not_in_group |
| Medtr8g037325 nance of chromosomes protein         | AM+K_not_in_group |
| Medtr1g094830 3HC4 type (RING finger) protein      | AM+K_not_in_group |
| Medtr2g011070 l transcription factor-like protein  | AM+K_not_in_group |
| Medtr8g096900 -related thaumatin family protein    | AM+K_not_in_group |
| Medtr5g023980 ine-kinase Cx32, related protein     | AM+K_not_in_group |
| Medtr1g012790 rA-like transporter family protein   | AM+K_not_in_group |
| Medtr5g027000 alcium-binding EF-hand protein       | AM+K_not_in_group |
| Medtr1g046200 B3-DNA-binding domain protein        | AM+K_not_in_group |
| Medtr8g070910 receptor-like kinase                 | AM+K_not_in_group |
| Medtr3g008760 e/pectin methylesterase inhibitor    | AM+K_in_group     |
| Medtr5g053450 hreonine kinase domain protein       | AM+K_not_in_group |
| Medtr1g032290 nudix hydrolase-like protein         | AM+K_not_in_group |
| Medtr3g101750 y/dehydrase and lipid transporter    | AM+K_not_in_group |
| Medtr8g067280 oHLH) family transcription factor    | AM+K_not_in_group |
| Medtr8g105140 nudix hydrolase-like protein         | AM+K_not_in_group |
| Medtr3g110840 ceptor-like kinase family protein    | AM+K_not_in_group |
| Medtr7g058640 synaptobrevin-like protein           | AM+K_in_group     |
| Medtr8g092630 ohol dehydrogenase-like protein      | AM+K_not_in_group |
| Medtr6g007647 issociated leucine zipper protein    | AM+K_not_in_group |
| Medtr3g086910 G protein coupled receptor           | AM+K_not_in_group |
| Medtr4g128400 osylase/hydrolase family protein     | AM+K_not_in_group |
| Medtr2g020450 ankyrin repeat protein               | AM+K_not_in_group |
| Medtr5g085340 ankyrin repeat protein               | AM+K_not_in_group |
| Medtr6g072450 ce protein (TIR-NBS-LRR class)       | AM+K_not_in_group |
| Medtr5g086330 LysM type receptor kinase            | AM+K_not_in_group |
| Medtr1g076800 DUF1442 family protein               | AM+K_in_group     |
| Medtr2g085370_s 1-like protein (other strand read) | AM+K_not_in_group |
| Medtr3g022000 hypothetical protein                 | AM+K_not_in_group |
| Medtr4g081330 i (TIR-NBS-LRR class), putative      | AM+K_not_in_group |
| Medtr4g112500 ransmembrane protein, putative       | AM+K_not_in_group |
| Medtr4g113680 hypothetical protein                 | AM+K_not_in_group |
| Medtr5g005230 hypothetical protein                 | AM+K_not_in_group |
| Medtr5g083960 LOB domain protein                   | AM+K_not_in_group |
| Medtr5g085550 hypothetical protein                 | AM+K_not_in_group |
| Medtr5g094730_s etical protein (other strand read) | AM+K_not_in_group |
| Medtr7g026890 reonine-kinase ATM-like protein      | AM+K_not_in_group |
| Medtr7g056803 sulin related MtN11/16/17 family     | AM+K_in_group     |
| Medtr7g056817 albumin I                            | AM+K_not_in_group |
| Medtr7g111020 enylyltransferase family protein     | AM+K_not_in_group |
| Medtr4g115540 glycosyltransferase                  | AM+K_not_in_group |
| Medtr4g127960 hypothetical protein                 | AM+K_not_in_group |
| Medtr7g083500 ceptor Serine/Threonine kinase       | AM+K_not_in_group |
| Medtr1g035090 ase BUB1-like protein, putative      | AM+K_not_in_group |
| Medtr1g098360 receptor-like kinase                 | AM+K_not_in_group |
| Medtr5g043210 chorismate mutase                    | AM+K_not_in_group |
| Medtr8g006270 ucosyltransferase family protein     | AM+K_not_in_group |
| Medtr8g020610 auxin-binding protein ABP19a         | AM+K_not_in_group |

diffusion\_prioritization\_ALL

|                |                                      |                   |
|----------------|--------------------------------------|-------------------|
| Medtr8g066030  | hypothetical protein                 | AM+K_not_in_group |
| Medtr8g479380  | multi-copper oxidase-like protein    | AM+K_not_in_group |
| Medtr1g114340  | ransmembrane protein, putative       | AM+K_not_in_group |
| Medtr1g075310  | protein for Xklp2) family protein    | AM+K_not_in_group |
| Medtr3g070000  | osphate transporter family protein   | AM+K_not_in_group |
| Medtr6g022860  | 6-phosphate 1-dehydrogenase          | AM+K_not_in_group |
| Medtr2g015720  | home birefringence-like protein      | AM+K_not_in_group |
| Medtr2g047975  | ransmembrane protein, putative       | AM+K_not_in_group |
| Medtr2g089140  | osylase/hydrolase family protein     | AM+K_not_in_group |
| Medtr3g100500  | s r-like protein (other strand read) | AM+K_not_in_group |
| Medtr4g094525  | y acid 2-hydroxylase-like protein    | AM+K_not_in_group |
| Medtr4g101330  | Lipid transfer protein               | AM+K_not_in_group |
| Medtr7g117430  | aspartyl protease family protein     | AM+K_not_in_group |
| Medtr8g098840  | ycoside hydrolase family protein     | AM+K_not_in_group |
| Medtr2g030400  | roxyisobutyrate dehydrogenase        | AM+K_not_in_group |
| Medtr7g026630  | yst subunit exo70 family protein     | AM+K_not_in_group |
| Medtr5g005540  | -1,4-lactone oxidase-like protein    | AM+K_not_in_group |
| Medtr4g058760  | osyltransferase family 2 protein     | AM+K_not_in_group |
| Medtr1g115230  | yl oligopeptidase family protein     | AM+K_not_in_group |
| Medtr4g006010  | xyloglucan glycosyltransferase       | AM+K_not_in_group |
| Medtr4g084870  | efflux carrier family transporter    | AM+K_not_in_group |
| Medtr6g085010  | ise in GUARD CELL-like protein       | AM+K_not_in_group |
| Medtr8g033360  | r family GT8 glycosyltransferase     | AM+K_not_in_group |
| Medtr2g075530  | hypothetical protein                 | AM+K_not_in_group |
| Medtr4g094812  | oyl-CoA 3-O-methyltransferase        | AM+K_not_in_group |
| Medtr6g082130  | ransmembrane protein, putative       | AM+K_in_group     |
| Medtr7g074865  | rasedehydration family protein       | AM+K_not_in_group |
| Medtr2g038320  | ise protein O-fucosyltransferase     | AM+K_not_in_group |
| Medtr4g099110  | beta-amylase                         | AM+K_not_in_group |
| Medtr0204s0010 | nbrane protein 70 family protein     | AM+K_not_in_group |
| Medtr1g034490  | eptidase family protein, putative    | AM+K_not_in_group |
| Medtr3g078270  | scorbate transporter-like protein    | AM+K_not_in_group |
| Medtr3g086340  | nding protein)-related protein 1C    | AM+K_not_in_group |
| Medtr3g113720  | cosyl hydrolase family 9 protein     | AM+K_not_in_group |
| Medtr4g029090  | WEB family plant protein             | AM+K_not_in_group |
| Medtr4g093660  | tars family protein abracl protein   | AM+K_not_in_group |
| Medtr5g042870  | DHHC-type zinc finger protein        | AM+K_not_in_group |
| Medtr5g098060  | clin-like arabinogalactan protein    | AM+K_not_in_group |
| Medtr7g066210  | gume lectin beta domain protein      | AM+K_not_in_group |
| Medtr7g102120  | nethionine synthase-like protein     | AM+K_not_in_group |
| Medtr8g085780  | calcium ion-binding protein          | AM+K_not_in_group |
| Medtr8g088510  | carboxyl-terminal peptidase          | AM+K_not_in_group |
| Medtr4g070020  | te dehydrogenase family protein      | AM+K_not_in_group |
| Medtr7g089010  | ranscription factor family protein   | AM+K_not_in_group |
| Medtr8g013640  | 4F5 family protein                   | AM+K_not_in_group |
| Medtr1g048610  | ethylene response factor             | AM+K_not_in_group |
| Medtr3g070970  | transcription factor                 | AM+K_not_in_group |
| Medtr1g105930  | l 1,3,4-trisphosphate 5/6-kinase     | AM+K_not_in_group |
| Medtr1g017020  | 1,4-beta-xylanase A-like protein     | AM+K_not_in_group |
| Medtr1g100200  | UPF0496 plant-like protein           | AM+K_not_in_group |
| Medtr2g105570  | umarate:CoA ligase-like protein      | AM+K_not_in_group |

## diffusion\_prioritization\_ALL

|               |                                                     |                   |
|---------------|-----------------------------------------------------|-------------------|
| Medtr3g092900 | caffeic acid O-methyltransferase                    | AM+K_not_in_group |
| Medtr3g107320 | phospholipase D alpha 1                             | AM+K_not_in_group |
| Medtr4g101680 | transcription factor                                | AM+K_not_in_group |
| Medtr5g020600 | 1,2-diphenol oxidase family protein                 | AM+K_not_in_group |
| Medtr5g082880 | 1,3-acyl-esterase family protein                    | AM+K_not_in_group |
| Medtr5g096310 | 1,4-sugar transporter family protein                | AM+K_not_in_group |
| Medtr5g096410 | 1,4-igase RIE1-like protein, putative               | AM+K_not_in_group |
| Medtr6g445110 | 14-16 plant/T8K14-16 protein                        | AM+K_not_in_group |
| Medtr7g104250 | 1,4-lysine-binding LysM domain protein              | AM+K_not_in_group |
| Medtr7g458880 | 1,2-diphenol oxidase family protein                 | AM+K_not_in_group |
| Medtr8g063270 | cellulose synthase-like protein                     | AM+K_not_in_group |
| Medtr8g077950 | transcription factor family protein                 | AM+K_not_in_group |
| Medtr8g023390 | hypothetical protein                                | AM+K_not_in_group |
| Medtr1g102350 | 1,3-aminopeptidase (other strand read)              | AM+K_not_in_group |
| Medtr1g036510 | caffeic acid O-methyltransferase                    | AM+K_not_in_group |
| Medtr7g083410 | 1,3-phosphodiesterase family protein                | AM+K_not_in_group |
| Medtr3g052490 | GDSL-like lipase/acylhydrolase                      | AM+K_not_in_group |
| Medtr3g101260 | 1,3-aminopeptidase main protein (other strand read) | AM+K_not_in_group |
| Medtr4g101760 | 1,3-pectin methylesterase inhibitor                 | AM+K_not_in_group |
| Medtr5g005480 | 1,3-phenylalanine-rich receptor-kinase-like protein | AM+K_not_in_group |
| Medtr1g023570 | 1,2-oxidase amino-terminal protein                  | AM+K_not_in_group |
| Medtr7g073230 | 1,3-kinase plant-like protein                       | AM+K_not_in_group |
| Medtr5g095710 | 1,4-transmembrane protein, putative                 | AM+K_not_in_group |
| Medtr4g081710 | transcription factor family protein                 | AM+K_not_in_group |
| Medtr4g128070 | 1,3-responsive AUX/IAA family protein               | AM+K_not_in_group |
| Medtr8g099575 | calcineurin B-like protein 4-1                      | AM+K_not_in_group |
| Medtr4g029430 | tubby C 2 protein                                   | AM+K_not_in_group |
| Medtr7g088220 | 1,4-transmembrane family protein                    | AM+K_not_in_group |
| Medtr4g122530 | MYRKY family transcription factor                   | AM+K_not_in_group |
| Medtr5g066730 | BTB/POZ domain plant protein                        | AM+K_not_in_group |
| Medtr7g090470 | triacylglycerol lipase SDP1                         | AM+K_not_in_group |
| Medtr4g063605 | CRAL/TRIO domain protein                            | AM+K_not_in_group |
| Medtr4g102660 | 1,3-responsive element-binding protein              | AM+K_not_in_group |
| Medtr1g079490 | germin family protein                               | AM+K_not_in_group |
| Medtr5g007710 | biquitin-protein ligase synoviolin                  | AM+K_not_in_group |
| Medtr2g084875 | 1,3-generate/prephenate dehydratase                 | AM+K_not_in_group |
| Medtr8g100065 | 1,3-tein/ABA-responsive-like protein                | AM+K_not_in_group |
| Medtr1g012390 | polygalacturonase                                   | AM+K_not_in_group |
| Medtr2g043730 | basic blue-like protein                             | AM+K_not_in_group |
| Medtr3g064115 | DJ-1/Pfpl family protein                            | AM+K_not_in_group |
| Medtr3g080580 | cytochrome P450 family protein                      | AM+K_not_in_group |
| Medtr5g018980 | cytochrome P450 family 71 protein                   | AM+K_not_in_group |
| Medtr5g067460 | MATE efflux family protein                          | AM+K_not_in_group |
| Medtr6g046760 | LRR resistance protein, putative                    | AM+K_not_in_group |
| Medtr2g028590 | ATRAD3, putative                                    | AM+K_not_in_group |
| Medtr8g064880 | 1,3-glucosyltransferase-like protein                | AM+K_not_in_group |
| Medtr7g026230 | actin-97                                            | AM+K_not_in_group |
| Medtr1g072570 | glutathione peroxidase                              | AM+K_not_in_group |
| Medtr1g088110 | pollen Ole e I family allergen                      | AM+K_not_in_group |
| Medtr8g088830 | basic blue-like protein                             | AM+K_not_in_group |
| Medtr2g105090 | 1,3-D-PAGE of leaf protein, putative                | AM+K_not_in_group |



## diffusion\_prioritization\_ALL

|                 |                                      |                   |
|-----------------|--------------------------------------|-------------------|
| Medtr4g058710   | Threonine-kinase NCRK protein        | AM+K_not_in_group |
| Medtr4g082330   | ransmembrane protein, putative       | AM+K_not_in_group |
| Medtr4g132450   | ise galacturonan-binding protein     | AM+K_not_in_group |
| Medtr5g087890   | ation initiation factor 2c, putative | AM+K_not_in_group |
| Medtr2g042900   | jasmonate zim-domain protein         | AM+K_not_in_group |
| Medtr8g015040   | LRR receptor-like kinase plant       | AM+K_not_in_group |
| Medtr2g083250   | plastocyanin-like domain protein     | AM+K_not_in_group |
| Medtr5g093520   | auxin-responsive family protein      | AM+K_not_in_group |
| Medtr3g464780   | inger ATL2-like protein, putative    | AM+K_not_in_group |
| Medtr4g010145   |                                      | AM+K_not_in_group |
| Medtr7g089360   | efflux carrier family transporter    | AM+K_not_in_group |
| Medtr7g006870   | ylgalacturonase inhibitor protein    | AM+K_not_in_group |
| Medtr1g094780   | nine ammonia-lyase-like protein      | AM+K_not_in_group |
| Medtr2g016630   | cellulose synthase-like protein      | AM+K_not_in_group |
| Medtr2g035780   | cellulose synthase-like protein      | AM+K_not_in_group |
| Medtr5g016600   | -1,4-xyllosyltransferase, putative   | AM+K_not_in_group |
| Medtr2g099110   | GRAS family transcription factor     | AM+K_not_in_group |
| Medtr4g134590   | UPF0420 C16orf58-like protein        | AM+K_not_in_group |
| Medtr2g049780   | termination factor family protein    | AM+K_not_in_group |
| Medtr4g031150   | hybrid sensory histidine kinase      | AM+K_not_in_group |
| Medtr1g016850   | ransmembrane protein, putative       | AM+K_not_in_group |
| Medtr5g026930   | thyltransferase PMT16, putative      | AM+K_not_in_group |
| Medtr3g088640   | na hydrolase-like domain kinase      | AM+K_not_in_group |
| Medtr6g016040   | Threonine-kinase plant, putative     | AM+K_not_in_group |
| Medtr2g097910   | myb transcription factor             | AM+K_not_in_group |
| Medtr5g006040   | plastocyanin-like domain protein     | AM+K_not_in_group |
| Medtr1g066530   | albumin-2 protein                    | AM+K_in_group     |
| Medtr0008s0470  | myb-related transcription factor     | AM+K_not_in_group |
| Medtr3g090430   | Dof domain zinc finger protein       | AM+K_not_in_group |
| Medtr4g133932   | pollen Ole e I family allergen       | AM+K_not_in_group |
| Medtr2g010410   | DNA ligase-like protein              | AM+K_not_in_group |
| Medtr1g101630   | calcium-dependent kinase             | AM+K_not_in_group |
| Medtr3g099540   | blue copper-like protein             | AM+K_not_in_group |
| Medtr6g066210   | psin inhibitor / Alpha-fucosidase    | AM+K_not_in_group |
| Medtr0065s0100  | type disease resistance protein      | AM+K_not_in_group |
| Medtr8g042980_s | nily member (other strand read)      | AM+K_not_in_group |
| Medtr8g066280   | anol 4'-sulfotransferase, putative   | AM+K_in_group     |
| Medtr4g115630   | receptor-like cytoplasmic kinase     | AM+K_not_in_group |
| Medtr1g050448   | -like acyl-esterase family protein   | AM+K_not_in_group |
| Medtr2g019600   | DUF642 family protein                | AM+K_not_in_group |
| Medtr4g063975   | expansin A10                         | AM+K_not_in_group |
| Medtr3g057860   | ochrome P450 family 71 protein       | AM+K_not_in_group |
| Medtr8g092670   | hypothetical protein                 | AM+K_not_in_group |
| Medtr1g063950   | auxin-responsive family protein      | AM+K_not_in_group |
| Medtr1g071610   | icetyl-CoA carboxylase, putative     | AM+K_not_in_group |
| Medtr3g491900   | ransmembrane protein, putative       | AM+K_not_in_group |
| Medtr4g021470   | dehydrogenase E1 beta subunit        | AM+K_not_in_group |
| Medtr6g029460   | ecific glutamate dehydrogenase       | AM+K_not_in_group |
| Medtr7g082570   | ss I glutamine amidotransferase      | AM+K_not_in_group |
| Medtr8g078170   | PR containing plant-like protein     | AM+K_not_in_group |
| Medtr8g096880   | UDP-D-galactose 4-epimerase          | AM+K_not_in_group |

diffusion\_prioritization\_ALL

|               |                                                |                   |
|---------------|------------------------------------------------|-------------------|
| Medtr8g102350 | hypothetical protein                           | AM+K_not_in_group |
| Medtr8g028165 | plant/F17O14-7 protein                         | AM+K_not_in_group |
| Medtr2g026590 | osin II heavy chain family protein             | AM+K_not_in_group |
| Medtr2g096970 | kinase 1B                                      | AM+K_not_in_group |
| Medtr3g108910 | hypothetical protein                           | AM+K_not_in_group |
| Medtr1g115370 | DUF966 domain protein                          | AM+K_not_in_group |
| Medtr3g071650 | chromome birefringence-like protein            | AM+K_not_in_group |
| Medtr7g015180 | cracking factor-like phosphatase               | AM+K_not_in_group |
| Medtr3g080050 | LysM receptor kinase K1B                       | AM+K_not_in_group |
| Medtr3g084090 | IDP-D-glucuronate 4-epimerase                  | AM+K_not_in_group |
| Medtr8g059615 | LRR receptor-like kinase                       | AM+K_not_in_group |
| Medtr5g058470 | domain class transcription factor              | AM+K_not_in_group |
| Medtr3g095690 | hypothetical protein                           | AM+K_not_in_group |
| Medtr3g074830 | late-responsive 1 family protein               | AM+K_not_in_group |
| Medtr4g112440 | translational translation initiation factor 5A | AM+K_not_in_group |
| Medtr1g105020 | hydroxyisoflavanone dehydratase                | AM+K_not_in_group |
| Medtr4g094285 | arabinofuranosidase-like protein               | AM+K_not_in_group |
| Medtr5g011980 | Lipid transfer protein                         | AM+K_not_in_group |
| Medtr7g024730 | plant integral membrane protein                | AM+K_not_in_group |
| Medtr3g031220 | WRKY transcription factor                      | AM+K_not_in_group |
| Medtr2g070180 | amino-terminal domain protein                  | AM+K_not_in_group |
| Medtr2g045780 | transmembrane transporter PHO1-like protein    | AM+K_not_in_group |
| Medtr5g009670 | phosphate 1-epimerase-like protein             | AM+K_not_in_group |
| Medtr6g013200 | early nodulin-like protein                     | AM+K_not_in_group |
| Medtr6g084320 | transmembrane transporter-like family-protein  | AM+K_not_in_group |
| Medtr7g026990 | cationic peroxidase                            | AM+K_not_in_group |
| Medtr7g044920 | albumin I                                      | AM+K_in_group     |
| Medtr7g075850 | MADS-box transcription factor                  | AM+K_not_in_group |
| Medtr8g037923 | DUF247 domain protein                          | AM+K_not_in_group |
| Medtr8g096730 | WRKY family transcription factor               | AM+K_not_in_group |
| Medtr8g036085 | LOB domain protein                             | AM+K_not_in_group |
| Medtr5g075640 | root phototropism-like protein                 | AM+K_not_in_group |
| Medtr4g027040 | 1-type zinc finger protein NFXL1               | AM+K_not_in_group |
| Medtr2g449790 | receptor-like kinase family protein            | AM+K_not_in_group |
| Medtr5g007820 | osylation factor-like protein A1D              | AM+K_not_in_group |
| Medtr1g086370 | glycogen synthase kinase                       | AM+K_not_in_group |
| Medtr6g088785 | receptor-like kinase family protein            | AM+K_not_in_group |
| Medtr5g005110 | transcription factor                           | AM+K_not_in_group |
| Medtr3g072180 | hypothetical protein                           | AM+K_not_in_group |
| Medtr6g084120 | transcription factor                           | AM+K_not_in_group |
| Medtr8g007675 | alpha/beta fold hydrolase                      | AM+K_not_in_group |
| Medtr2g087350 | protein ligase PUB22-like protein              | AM+K_not_in_group |
| Medtr2g022480 | extracellular dermal glycoprotein              | AM+K_not_in_group |
| Medtr2g037250 | Defensin fusion                                | AM+K_not_in_group |
| Medtr3g111120 | phosphate carboxykinase [ATP] protein          | AM+K_not_in_group |
| Medtr4g118810 | plant integral membrane protein                | AM+K_not_in_group |
| Medtr6g004430 | phosphate ATP-binding protein, putative        | AM+K_not_in_group |
| Medtr6g081780 | MATE efflux family protein                     | AM+K_not_in_group |
| Medtr8g104980 | receptor-associated-like protein               | AM+K_not_in_group |
| Medtr1g029140 | transmembrane protein, putative                | AM+K_not_in_group |
| Medtr1g075153 | sieve element occlusion protein                | AM+K_not_in_group |

## diffusion\_prioritization\_ALL

|               |                                       |                   |
|---------------|---------------------------------------|-------------------|
| Medtr1g075170 | sieve element occlusion protein       | AM+K_not_in_group |
| Medtr1g109630 | reticulon-like protein B2             | AM+K_not_in_group |
| Medtr3g064800 | protein for Xklp2) family protein     | AM+K_not_in_group |
| Medtr3g107360 | phospholipase D alpha 1               | AM+K_not_in_group |
| Medtr4g014440 | -like acyl-esterase family protein    | AM+K_not_in_group |
| Medtr4g096780 | aryotic cytochrome b561 protein       | AM+K_not_in_group |
| Medtr5g012080 | transcription factor                  | AM+K_not_in_group |
| Medtr5g097620 | auxin-responsive family protein       | AM+K_not_in_group |
| Medtr7g117375 | Dopamine beta-monoxygenase            | AM+K_not_in_group |
| Medtr4g008860 | ethylene response factor              | AM+K_not_in_group |
| Medtr3g010780 | esterase/pectinesterase inhibitor     | AM+K_not_in_group |
| Medtr7g010020 | eucine zipper ATHB-like protein       | AM+K_not_in_group |
| Medtr8g038170 | annexin D8                            | AM+K_not_in_group |
| Medtr8g013600 | tor-like Serine/Threonine-kinase      | AM+K_not_in_group |
| Medtr4g008010 | core-2/l-branching enzyme             | AM+K_not_in_group |
| Medtr3g104370 | transcription factor family protein   | AM+K_not_in_group |
| Medtr8g015500 | core-2/l-branching enzyme             | AM+K_not_in_group |
| Medtr1g007880 | ABIL1-like protein                    | AM+K_not_in_group |
| Medtr6g051780 | transmembrane protein, putative       | AM+K_not_in_group |
| Medtr1g087710 | DUF761 domain protein                 | AM+K_not_in_group |
| Medtr1g077520 | alpha-galactosidase-like protein      | AM+K_not_in_group |
| Medtr4g099320 | specific glutamate dehydrogenase      | AM+K_not_in_group |
| Medtr2g027130 | WEB family plant protein              | AM+K_not_in_group |
| Medtr2g079830 | fiber protein Fb34                    | AM+K_not_in_group |
| Medtr3g101480 | plant/F17M5-140 protein               | AM+K_not_in_group |
| Medtr4g027440 | zinc-finger transcription factor      | AM+K_not_in_group |
| Medtr5g021990 | WEB family plant protein              | AM+K_not_in_group |
| Medtr5g032020 | ascorbate transporter-like protein    | AM+K_not_in_group |
| Medtr5g067160 | PB1 domain protein                    | AM+K_not_in_group |
| Medtr5g082910 | myb transcription factor              | AM+K_not_in_group |
| Medtr7g092340 | transmembrane protein, putative       | AM+K_not_in_group |
| Medtr4g124700 | auxin-responsive family protein       | AM+K_not_in_group |
| Medtr4g107970 | WRKY family transcription factor      | AM+K_not_in_group |
| Medtr1g066850 | putative active ROPs-like protein     | AM+K_not_in_group |
| Medtr1g080440 | receptor-like kinase family protein   | AM+K_not_in_group |
| Medtr1g093080 | transcription factor family protein   | AM+K_not_in_group |
| Medtr1g086540 | pectinesterase                        | AM+K_not_in_group |
| Medtr4g081440 | flavonol 4-reductase-like protein     | AM+K_not_in_group |
| Medtr4g081390 | non motor catalytic domain protein    | AM+K_not_in_group |
| Medtr3g102400 | serine kinase, plant-type protein     | AM+K_not_in_group |
| Medtr1g085040 | myb transcription factor              | AM+K_not_in_group |
| Medtr4g013260 | WRKY transcription factor             | AM+K_not_in_group |
| Medtr8g023760 | -alpha-steroid 4-dehydrogenase        | AM+K_not_in_group |
| Medtr1g104650 | platelet 9S-lipoxygenase-like protein | AM+K_not_in_group |
| Medtr2g024310 | malonyl-CoA decarboxylase             | AM+K_not_in_group |
| Medtr5g082620 | inositol-specific phospholipase C     | AM+K_not_in_group |
| Medtr8g011530 | asparagine-tRNA ligase                | AM+K_not_in_group |
| Medtr8g042670 | subtilisin-like serine protease       | AM+K_not_in_group |
| Medtr7g076080 | homeobox leucine zipper protein       | AM+K_not_in_group |
| Medtr5g043970 | 6-dehydrogenase family protein        | AM+K_not_in_group |
| Medtr4g129630 | hydroxylase superfamily protein       | AM+K_not_in_group |

## diffusion\_prioritization\_ALL

|               |                                    |                   |
|---------------|------------------------------------|-------------------|
| Medtr1g090520 | ceptor-like kinase family protein  | AM+K_not_in_group |
| Medtr3g034370 | BPS1-like protein                  | AM+K_not_in_group |
| Medtr1g106200 | osyl hydrolase family 10 protein   | AM+K_not_in_group |
| Medtr4g073720 | -related thaumatin family protein  | AM+K_not_in_group |
| Medtr6g016840 | side hydrolase family 81 protein   | AM+K_not_in_group |
| Medtr4g129010 | tyrosine kinase family protein     | AM+K_not_in_group |
| Medtr4g074670 | alanyl-tRNA synthetase             | AM+K_not_in_group |
| Medtr1g050425 | heiny transferase family protein   | AM+K_not_in_group |
| Medtr4g014490 | DUF538 family protein              | AM+K_not_in_group |
| Medtr6g477780 | beta-amylase                       | AM+K_not_in_group |
| Medtr8g102550 | ein phosphatase 2C-like protein    | AM+K_not_in_group |
| Medtr8g103400 | like-COV protein                   | AM+K_not_in_group |
| Medtr1g011600 | utarate-dependent dioxygenase      | AM+K_not_in_group |
| Medtr1g023120 | beta-like galactosidase            | AM+K_not_in_group |
| Medtr1g078240 | aspartyl protease family protein   | AM+K_not_in_group |
| Medtr5g077360 | osin group485 secreted peptide     | AM+K_not_in_group |
| Medtr7g094840 | hypothetical protein               | AM+K_not_in_group |
| Medtr7g111030 | metal ion-binding protein          | AM+K_not_in_group |
| Medtr8g077510 | ranscription factor family protein | AM+K_not_in_group |
| Medtr2g023990 | pectate lyase family protein       | AM+K_not_in_group |
| Medtr2g099040 | rotein ubiquinone oxidoreductase   | AM+K_not_in_group |
| Medtr3g062850 | hypothetical protein               | AM+K_not_in_group |
| Medtr4g092760 | palmitoyltransferase TIP1          | AM+K_not_in_group |
| Medtr5g029680 | eat shock transcription factor A3  | AM+K_not_in_group |
| Medtr7g089330 | ydroxymethylglutaryl-CoA lyase     | AM+K_not_in_group |
| Medtr2g038040 | transcription factor               | AM+K_not_in_group |
| Medtr3g035970 | late-ammonia ligase-like protein   | AM+K_not_in_group |
| Medtr3g087640 | e acyl-transferase family protein  | AM+K_not_in_group |
| Medtr7g085180 | in-nucleotide phosphohydrolase     | AM+K_not_in_group |
| Medtr1g102860 | eat shock transcription factor A3  | AM+K_not_in_group |
| Medtr3g117800 | osyl hydrolase family 10 protein   | AM+K_not_in_group |
| Medtr2g076400 | DUF640 family protein              | AM+K_not_in_group |
| Medtr5g067310 | receptor kinase                    | AM+K_not_in_group |
| Medtr7g095450 | Serine/Threonine-kinase Nek4       | AM+K_not_in_group |
| Medtr1g102190 | Pti1-like kinase                   | AM+K_not_in_group |
| Medtr5g032580 | hypothetical protein               | AM+K_not_in_group |
| Medtr6g463400 | ponse/antifungal domain protein    | AM+K_not_in_group |
| Medtr1g025180 | hypothetical protein               | AM+K_not_in_group |
| Medtr4g035430 | DNA-binding domain protein         | AM+K_not_in_group |
| Medtr4g128570 | osylase/hydrolase family protein   | AM+K_not_in_group |
| Medtr2g101830 | anyl-nucleotide exchange factor    | AM+K_not_in_group |
| Medtr4g128930 | zinc finger constans-like protein  | AM+K_not_in_group |
| Medtr1g066720 | hypothetical protein               | AM+K_not_in_group |
| Medtr4g094560 | ess up-regulated Nod 19 protein    | AM+K_not_in_group |
| Medtr8g095440 | lin-domain kinase CDPK protein     | AM+K_not_in_group |
| Medtr3g064740 | glutamate decarboxylase            | AM+K_not_in_group |
| Medtr7g075453 | clin-like arabinogalactan protein  | AM+K_not_in_group |
| Medtr6g488150 | auxin response factor              | AM+K_not_in_group |
| Medtr3g040800 | tyrosine kinase family protein     | AM+K_not_in_group |
| Medtr4g024630 | plastid transketolase              | AM+K_not_in_group |
| Medtr2g076590 | secreted EP1-like glycoprotein     | AM+K_not_in_group |

## diffusion\_prioritization\_ALL

|               |                                               |                   |
|---------------|-----------------------------------------------|-------------------|
| Medtr2g078920 | hypothetical protein                          | AM+K_not_in_group |
| Medtr4g085910 | response element-binding factor               | AM+K_not_in_group |
| Medtr3g111510 | all associated kinase-like protein            | AM+K_not_in_group |
| Medtr2g089120 | sesquiterpene synthase                        | AM+K_in_group     |
| Medtr2g098070 | ADP/ATP carrier protein                       | AM+K_not_in_group |
| Medtr3g101400 | patatin-like phospholipase                    | AM+K_not_in_group |
| Medtr4g132380 | F-box plant-like protein, putative            | AM+K_not_in_group |
| Medtr4g132430 | WRKY1b transcription factor                   | AM+K_not_in_group |
| Medtr5g007760 | stilbene synthase family protein              | AM+K_not_in_group |
| Medtr6g055180 | hypothetical protein                          | AM+K_not_in_group |
| Medtr7g009780 | alcohol dehydrogenase-like protein            | AM+K_not_in_group |
| Medtr7g014570 | flavone-7-O-methyltransferase                 | AM+K_not_in_group |
| Medtr7g016700 | stilbene synthase family protein              | AM+K_not_in_group |
| Medtr1g105305 | precursor GPI-anchored protein                | AM+K_not_in_group |
| Medtr4g059720 | clin-like arabinogalactan protein             | AM+K_not_in_group |
| Medtr3g116590 | receptor-like kinase plant                    | AM+K_not_in_group |
| Medtr4g035590 | transcription factor-like protein             | AM+K_not_in_group |
| Medtr4g070540 | DUF241 domain protein                         | AM+K_not_in_group |
| Medtr4g085480 | ase, plant-type protein, putative             | AM+K_not_in_group |
| Medtr1g083520 | esterase/pectinesterase inhibitor             | AM+K_not_in_group |
| Medtr5g030070 | tetraspanin family protein                    | AM+K_not_in_group |
| Medtr1g073610 | plant acid phosphatase                        | AM+K_not_in_group |
| Medtr6g084620 | transmembrane protein, putative               | AM+K_not_in_group |
| Medtr7g106450 | CAAT-binding transcription factor             | AM+K_not_in_group |
| Medtr7g077150 | LRR receptor-like kinase                      | AM+K_not_in_group |
| Medtr8g079940 | kinase regulator ARR2-like protein            | AM+K_not_in_group |
| Medtr5g069180 | port/detoxification domain protein            | AM+K_not_in_group |
| Medtr1g116650 | porter (SP) family MFS transporter            | AM+K_not_in_group |
| Medtr3g075510 | inhibitor or seed inhibition protein          | AM+K_not_in_group |
| Medtr3g110710 | xylulose kinase-like protein                  | AM+K_not_in_group |
| Medtr4g011660 | mediated interaction domain protein           | AM+K_not_in_group |
| Medtr5g030580 | ster spinster-like protein, putative          | AM+K_not_in_group |
| Medtr8g019480 | substrate carrier family protein              | AM+K_not_in_group |
| Medtr8g097040 | transmembrane protein, putative               | AM+K_not_in_group |
| Medtr8g465910 | protein ligase RMA1H1-like protein            | AM+K_not_in_group |
| Medtr7g052240 | hypothetical protein                          | AM+K_not_in_group |
| Medtr1g019540 | UDP-glucuronosyltransferase                   | AM+K_not_in_group |
| Medtr1g068810 | soluble inorganic pyrophosphatase             | AM+K_not_in_group |
| Medtr1g104520 | hypothetical protein                          | AM+K_not_in_group |
| Medtr2g018860 | 70 kDa molecular chaperone regulator          | AM+K_not_in_group |
| Medtr2g034680 | Chitinase                                     | AM+K_not_in_group |
| Medtr2g096660 | UDP-glucuronic acid decarboxylase             | AM+K_not_in_group |
| Medtr3g116080 | papain family cysteine protease               | AM+K_not_in_group |
| Medtr4g063600 | UDP-glucuronic acid decarboxylase             | AM+K_not_in_group |
| Medtr4g102900 | chitin saccharide biosynthesis protein        | AM+K_not_in_group |
| Medtr4g118760 | VAMP-associated protein                       | AM+K_not_in_group |
| Medtr4g130510 | cellulose synthase-like protein               | AM+K_not_in_group |
| Medtr5g036570 | germin family 1 protein                       | AM+K_not_in_group |
| Medtr6g009480 | chitinase-related thaumatin family protein    | AM+K_not_in_group |
| Medtr6g023760 | plastocyanin-like domain protein              | AM+K_not_in_group |
| Medtr7g021660 | 14-3-3 protein-interactive CRIB motif protein | AM+K_not_in_group |

## diffusion\_prioritization\_ALL

|                |                                     |                   |
|----------------|-------------------------------------|-------------------|
| Medtr8g102240  | transcription factor-like protein   | AM+K_not_in_group |
| Medtr2g013780  | DUF506 family protein               | AM+K_not_in_group |
| Medtr8g045555  | ted protein bet V I family protein  | AM+K_not_in_group |
| Medtr1g040315  | yl alcohol O-benzoyltransferase     | AM+K_not_in_group |
| Medtr2g035120  | ase-resistance response protein     | AM+K_not_in_group |
| Medtr4g132460  | pectate lyase family protein        | AM+K_not_in_group |
| Medtr5g011210  | expansin A10                        | AM+K_not_in_group |
| Medtr7g069660  | ranscription factor family protein  | AM+K_not_in_group |
| Medtr7g075770  | plastocyanin-like domain protein    | AM+K_not_in_group |
| Medtr5g078080  | LRR receptor-like kinase            | AM+K_not_in_group |
| Medtr2g078360  | ZIP transcription factor, putative  | AM+K_not_in_group |
| Medtr0009s0100 | hypothetical protein                | AM+K_not_in_group |
| Medtr1g086530  | myb transcription factor            | AM+K_not_in_group |
| Medtr5g073860  | ransmembrane protein, putative      | AM+K_not_in_group |
| Medtr5g005920  | ydroxyisoflavanone dehydratase      | AM+K_not_in_group |
| Medtr8g067930  | stin-domain receptor kinase IX.1    | AM+K_not_in_group |
| Medtr0035s0150 | -3-acetic acid-amido synthetase     | AM+K_not_in_group |
| Medtr8g087390  | ransmembrane protein, putative      | AM+K_not_in_group |
| Medtr5g070870  | ubiquinol oxidase 1a                | AM+K_not_in_group |
| Medtr6g088715  | yltransferase CMT3-like protein     | AM+K_not_in_group |
| Medtr1g095560  | he carboxypeptidase-like protein    | AM+K_not_in_group |
| Medtr4g065003  | LRR receptor-like kinase            | AM+K_not_in_group |
| Medtr3g078800  | roline-rich glycoprotein, putative  | AM+K_not_in_group |
| Medtr8g098510  | ceptor-like kinase family protein   | AM+K_not_in_group |
| Medtr1g050480  | hypothetical protein                | AM+K_not_in_group |
| Medtr2g009890  | sription factor (other strand read) | AM+K_not_in_group |
| Medtr5g090900  | hypothetical protein                | AM+K_not_in_group |
| Medtr4g070320  | transcription factor                | AM+K_not_in_group |
| Medtr1g110210  | phosphatase 2C family protein       | AM+K_not_in_group |
| Medtr1g111330  | holine transporter family protein   | AM+K_not_in_group |
| Medtr2g080950  | ARF GTPase activator                | AM+K_not_in_group |
| Medtr3g096330  | side hydrolase family 28 protein    | AM+K_not_in_group |
| Medtr4g081370  | domain class transcription factor   | AM+K_not_in_group |
| Medtr8g028695  | inase plant-like protein, putative  | AM+K_not_in_group |
| Medtr1g086790  | VRKY family transcription factor    | AM+K_not_in_group |
| Medtr5g045470  | and hageman factor-like protein     | AM+K_not_in_group |
| Medtr4g130540  | heat shock 70 kDa protein           | AM+K_not_in_group |
| Medtr1g026020  | expansin-A1-like protein            | AM+K_not_in_group |
| Medtr3g117090  | ylinositol transfer family protein  | AM+K_not_in_group |
| Medtr5g083910  | LRR receptor-like kinase            | AM+K_not_in_group |
| Medtr1g112940  | gulatory B subunit family protein   | AM+K_in_group     |
| Medtr2g437530  | LEPP plasma membrane protein        | AM+K_not_in_group |
| Medtr5g021160  | IA-like transporter family protein  | AM+K_not_in_group |
| Medtr5g024300  | o acid transporter family protein   | AM+K_not_in_group |
| Medtr6g037340  | 4-dehydrogenase family protein      | AM+K_not_in_group |
| Medtr2g028190  | aspartyl protease family protein    | AM+K_not_in_group |
| Medtr1g043240  | onine-protein phosphatase PP1       | AM+K_not_in_group |
| Medtr2g082180  | kDa class VI heat shock protein     | AM+K_not_in_group |
| Medtr6g032990  | ranscription factor family protein  | AM+K_not_in_group |
| Medtr1g028890  | LRR receptor-like kinase            | AM+K_not_in_group |
| Medtr2g010590  | -rich secretory protein, antigen 5  | AM+K_not_in_group |

## diffusion\_prioritization\_ALL

|                                                           |                   |
|-----------------------------------------------------------|-------------------|
| Medtr8g022720 class II small heat-shock protein           | AM+K_not_in_group |
| Medtr4g044383 hypothetical protein                        | AM+K_not_in_group |
| Medtr4g097940 (LH) DNA-binding family protein             | AM+K_not_in_group |
| Medtr6g464030 Rpp4C4                                      | AM+K_not_in_group |
| Medtr7g085840 lycosyltransferase family protein           | AM+K_not_in_group |
| Medtr5g020570 ubiquitin-protein ligase                    | AM+K_not_in_group |
| Medtr1g082750 outer membrane ofs-like protein             | AM+K_not_in_group |
| Medtr3g100420 case:anthocyanin acyltransferase            | AM+K_not_in_group |
| Medtr4g106630 transmembrane protein, putative             | AM+K_not_in_group |
| Medtr4g116010 n-thase/flavanone 3-hydroxylase             | AM+K_not_in_group |
| Medtr1g041345 tatic translation initiation factor 2c      | AM+K_not_in_group |
| Medtr3g074060 3 amino-terminal domain protein             | AM+K_not_in_group |
| Medtr3g452020 ankyrin repeat plant-like protein           | AM+K_not_in_group |
| Medtr4g075640 nine nucleotide exchange factor             | AM+K_not_in_group |
| Medtr4g124940 nucleolysin TIAR-like protein               | AM+K_not_in_group |
| Medtr5g021190 beta-galactosidase                          | AM+K_not_in_group |
| Medtr8g098755 3PR containing plant-like protein           | AM+K_not_in_group |
| Medtr1g032190 calcium ion-binding protein                 | AM+K_not_in_group |
| Medtr1g080800 case / Hevein / PR-4 / Wheatwin2            | AM+K_not_in_group |
| Medtr3g025830 hypothetical protein                        | AM+K_not_in_group |
| Medtr4g019225 2,2'-diphenol oxidase family protein        | AM+K_in_group     |
| Medtr4g095050 cytochrome P450 family protein              | AM+K_not_in_group |
| Medtr5g055680 n-thase/flavanone 3-hydroxylase             | AM+K_in_group     |
| Medtr8g015560 hypothetical protein                        | AM+K_not_in_group |
| Medtr1g101280 romeobox leucine zipper protein             | AM+K_not_in_group |
| Medtr7g117980 hypothetical protein                        | AM+K_not_in_group |
| Medtr2g014380 transmembrane protein, putative             | AM+K_not_in_group |
| Medtr7g083200 case/thioesterase family protein            | AM+K_not_in_group |
| Medtr8g028410 ABIL1-like protein                          | AM+K_not_in_group |
| Medtr3g465470 tyrosine kinase family protein              | AM+K_not_in_group |
| Medtr4g124855 3,6-pectin methylesterase inhibitor         | AM+K_not_in_group |
| Medtr3g105880 ein phosphatase 2C-like protein             | AM+K_not_in_group |
| Medtr3g087770 letoxification superfamily protein          | AM+K_not_in_group |
| Medtr1g081900 Na <sup>+</sup> /H <sup>+</sup> exchanger 1 | AM+K_not_in_group |
| Medtr2g016400 receptor-like kinase                        | AM+K_not_in_group |
| Medtr2g034010 ntingtin-interacting K-like protein         | AM+K_not_in_group |
| Medtr3g095660 TLD-domain nucleolar protein                | AM+K_not_in_group |
| Medtr8g066090 sphatidylinositol 3-and 4-kinase            | AM+K_not_in_group |
| Medtr1g075330 1-repair protein XRCC4, putative            | AM+K_not_in_group |
| Medtr2g098060 transmembrane protein, putative             | AM+K_not_in_group |
| Medtr3g464390 transmembrane protein, putative             | AM+K_not_in_group |
| Medtr3g449770 transcription factor                        | AM+K_not_in_group |
| Medtr5g037950 thioredoxin                                 | AM+K_not_in_group |
| Medtr6g444980 ranscription factor family protein          | AM+K_not_in_group |
| Medtr8g014690 stor-like kinase plant-like protein         | AM+K_not_in_group |
| Medtr5g092220 istance (TIR) domain protein                | AM+K_not_in_group |
| Medtr1g418545 1-cyl-CoA-binding domain protein            | AM+K_not_in_group |
| Medtr2g101120 Avr9/Cf-9 rapidly elicited protein          | AM+K_not_in_group |
| Medtr2g099790 almodulin-binding family protein            | AM+K_not_in_group |
| Medtr1g106915 berellin-regulated family protein           | AM+K_not_in_group |
| Medtr3g467380 ranscription factor family protein          | AM+K_not_in_group |

## diffusion\_prioritization\_ALL

|                                                  |                   |
|--------------------------------------------------|-------------------|
| Medtr7g010980 ransmembrane protein, putative     | AM+K_not_in_group |
| Medtr6g078290 Lipid transfer protein             | AM+K_not_in_group |
| Medtr7g104220 GDSL-like lipase/acylhydrolase     | AM+K_not_in_group |
| Medtr6g007767 phen-inducible alpha-dioxygenase   | AM+K_not_in_group |
| Medtr6g008820 transporter B family-like protein  | AM+K_not_in_group |
| Medtr3g068030 carboxylase/oxygenase activase     | AM+K_in_group     |
| Medtr1g067480 yst subunit exo70 family protein   | AM+K_not_in_group |
| Medtr1g103420 Lipid transfer protein             | AM+K_not_in_group |
| Medtr4g117390 4-beta-D-glucanase-like protein    | AM+K_not_in_group |
| Medtr6g012160 rogenase family oxidoreductase     | AM+K_not_in_group |
| Medtr7g065270 , amino-terminal domain protein    | AM+K_not_in_group |
| Medtr7g096810 ethylene response factor           | AM+K_not_in_group |
| Medtr2g086420 BZIP family transcription factor   | AM+K_not_in_group |
| Medtr7g015670 feronia receptor-like kinase       | AM+K_not_in_group |
| Medtr2g090675 ption activator GLK1-like protein  | AM+K_not_in_group |
| Medtr3g086940 onine-kinase SAPK1-like protein    | AM+K_not_in_group |
| Medtr7g084690 Avr9/Cf-9 rapidly elicited protein | AM+K_not_in_group |
| Medtr1g031530 receptor-like kinase               | AM+K_not_in_group |
| Medtr3g086650 hypothetical protein               | AM+K_not_in_group |
| Medtr1g099570 x ABC transporter family protein   | AM+K_not_in_group |
| Medtr7g052640 ne-Rich (NCR) secreted peptide     | AM+K_not_in_group |
| Medtr8g093840 x ABC transporter family protein   | AM+K_not_in_group |
| Medtr5g090970 r factor jungbrunnen-like protein  | AM+K_not_in_group |
| Medtr4g123070 dihydrolipoyl dehydrogenase        | AM+K_not_in_group |
| Medtr5g032150 MADS-box transcription factor      | AM+K_not_in_group |
| Medtr6g072710 eductase family oxidoreductase     | AM+K_not_in_group |
| Medtr1g088590 inc finger CCCH domain protein     | AM+K_not_in_group |
| Medtr2g039250 n assembly factor group protein    | AM+K_not_in_group |
| Medtr4g132250 enate/prephenate dehydratase       | AM+K_not_in_group |
| Medtr7g076160 signalosome complex subunit 1      | AM+K_not_in_group |
| Medtr8g058330 Sec61 subunit alpha-like protein   | AM+K_not_in_group |
| Medtr8g089990 polyadenylate-binding protein II   | AM+K_not_in_group |
| Medtr5g027020 tone-lysine N-methyltransferase    | AM+K_not_in_group |
| Medtr8g106870 ransmembrane protein, putative     | AM+K_not_in_group |
| Medtr2g083870 VRKY family transcription factor   | AM+K_not_in_group |
| Medtr5g075070 methyltransferase-like protein     | AM+K_not_in_group |
| Medtr1g093730 ie fragile-X-F-associated protein  | AM+K_not_in_group |
| Medtr2g062770 CTP synthase-like protein          | AM+K_not_in_group |
| Medtr2g102370 ose oxidase/kelch repeat protein   | AM+K_not_in_group |
| Medtr3g077080 oxidase, enzyme domain protein     | AM+K_not_in_group |
| Medtr4g080160 sphate synthase domain protein     | AM+K_not_in_group |
| Medtr5g007980 PWWP/MBT superfamily protein       | AM+K_not_in_group |
| Medtr1g014180 tubby C 2 protein                  | AM+K_not_in_group |
| Medtr1g098700 plant/F1M20-13 protein             | AM+K_not_in_group |
| Medtr1g108640 DUF4228 domain protein             | AM+K_not_in_group |
| Medtr2g078680 domain class transcription factor  | AM+K_not_in_group |
| Medtr2g096230 yst subunit exo70 family protein   | AM+K_in_group     |
| Medtr3g065080 Avr9/Cf-9 rapidly elicited protein | AM+K_not_in_group |
| Medtr3g099670 clathrin assembly protein          | AM+K_not_in_group |
| Medtr4g086160 ERF domain transcription factor    | AM+K_not_in_group |
| Medtr4g086165 ERF domain transcription factor    | AM+K_not_in_group |



## diffusion\_prioritization\_ALL

|                |                                            |                   |
|----------------|--------------------------------------------|-------------------|
| Medtr4g086220  | ERF domain transcription factor            | AM+K_not_in_group |
| Medtr4g091090  | module stress tolerance protein            | AM+K_not_in_group |
| Medtr4g093810  | hypothetical protein                       | AM+K_not_in_group |
| Medtr4g094532  | divine nuclear-like protein, putative      | AM+K_not_in_group |
| Medtr5g015590  | plasma membrane-type protein               | AM+K_not_in_group |
| Medtr7g101890  | auxin-responsive family protein            | AM+K_not_in_group |
| Medtr7g109420  | DUF4228 domain protein                     | AM+K_not_in_group |
| Medtr7g109440  | hypothetical protein                       | AM+K_not_in_group |
| Medtr8g086820  | DUF1685 family protein                     | AM+K_not_in_group |
| Medtr8g099000  | tubby C 2 protein                          | AM+K_not_in_group |
| Medtr4g104760  | protein phosphatase 2c, putative           | AM+K_not_in_group |
| Medtr0280s0040 | leucine Serine/Threonine-kinase plant      | AM+K_not_in_group |
| Medtr4g068770  | ribosomal protein constituent of ribosome  | AM+K_not_in_group |
| Medtr4g084180  | sulfiredoxin                               | AM+K_not_in_group |
| Medtr4g097500  | thioredoxin-like protein                   | AM+K_not_in_group |
| Medtr5g087710  | oligo dehydrogenase family protein         | AM+K_not_in_group |
| Medtr6g028140  | syntaxin of plants 122 protein             | AM+K_not_in_group |
| Medtr7g094470  | transmembrane protein, putative            | AM+K_not_in_group |
| Medtr0072s0040 | Arabidopsis petala developmental regulator | AM+K_not_in_group |
| Medtr2g009910  | transmembrane protein, putative            | AM+K_not_in_group |
| Medtr3g083760  | Lipid transfer protein                     | AM+K_not_in_group |
| Medtr3g096410  | ABC transporter family protein             | AM+K_not_in_group |
| Medtr3g099520  | hypothetical protein                       | AM+K_not_in_group |
| Medtr3g107730  | boron transporter-like protein             | AM+K_not_in_group |
| Medtr4g068870  | Non-symbiotic hemoglobin                   | AM+K_not_in_group |
| Medtr4g069220  | Lipid transfer protein                     | AM+K_not_in_group |
| Medtr4g094715  | pectin lyase superfamily protein           | AM+K_not_in_group |
| Medtr4g122740  | pectin methyl-esterase inhibitor           | AM+K_not_in_group |
| Medtr5g013470  | specific glutamate dehydrogenase           | AM+K_not_in_group |
| Medtr5g094210  | Lipid transfer protein                     | AM+K_not_in_group |
| Medtr7g078680  | glycoside hydrolase family protein         | AM+K_not_in_group |
| Medtr8g070540  | CTP synthase-like protein                  | AM+K_not_in_group |
| Medtr8g102380  | pectinesterase                             | AM+K_not_in_group |
| Medtr1g097420  | RAB GTPase-like protein A1D                | AM+K_not_in_group |
| Medtr7g087480  | hypothetical protein                       | AM+K_not_in_group |
| Medtr7g110830  | myb transcription factor MYB64             | AM+K_not_in_group |
| Medtr1g019040  | receptor (SPRY) domain protein             | AM+K_not_in_group |
| Medtr1g054880  | pectinesterase/pectinesterase inhibitor    | AM+K_in_group     |
| Medtr1g088130  | pollen Ole e I family allergen             | AM+K_not_in_group |
| Medtr1g094750  | auxin-responsive family protein            | AM+K_not_in_group |
| Medtr2g022450  | endoglucanase inhibitor protein            | AM+K_not_in_group |
| Medtr3g055610  | phosphodiesterase family protein           | AM+K_in_group     |
| Medtr3g086260  | stilbene synthase family protein           | AM+K_not_in_group |
| Medtr4g062500  | cytochrome P450 family flavone synthase    | AM+K_not_in_group |
| Medtr7g111200  | hypothetical protein                       | AM+K_not_in_group |
| Medtr8g075550  | thaumatin-related thaumatin family protein | AM+K_not_in_group |
| Medtr7g111170  | hypothetical protein                       | AM+K_not_in_group |
| Medtr8g105930  | transcription factor family protein        | AM+K_not_in_group |
| Medtr1g009190  | arabinose kinase-like protein              | AM+K_not_in_group |
| Medtr2g034700  | protein interaction domain protein         | AM+K_not_in_group |
| Medtr2g039120  | beta-like galactosidase                    | AM+K_not_in_group |

## diffusion\_prioritization\_ALL

|                                                      |                   |
|------------------------------------------------------|-------------------|
| Medtr2g05612017, peroxisomal protein, putative       | AM+K_not_in_group |
| Medtr2g075140 receptor-like kinase                   | AM+K_not_in_group |
| Medtr2g099440 ransmembrane protein, putative         | AM+K_not_in_group |
| Medtr3g105730 ed protein phosphatase type 2C         | AM+K_not_in_group |
| Medtr4g033435 patellin-like protein                  | AM+K_not_in_group |
| Medtr4g087740 hypothetical protein                   | AM+K_not_in_group |
| Medtr4g129470 ubiquitin-protein ligase XBOS32        | AM+K_not_in_group |
| Medtr4g132000_s tein, putative (other strand read)   | AM+K_not_in_group |
| Medtr5g029100 osylase/hydrolase family protein       | AM+K_not_in_group |
| Medtr5g076240 long-chain acyl-CoA synthetase         | AM+K_not_in_group |
| Medtr8g080770 tokinin receptor histidine kinase      | AM+K_in_group     |
| Medtr8g101570 totetrameric cytidine deaminase        | AM+K_not_in_group |
| Medtr2g028980 peroxidase family protein              | AM+K_in_group     |
| Medtr6g083320 calmodulin-binding-like protein        | AM+K_not_in_group |
| Medtr8g079550 )-NBS-LRR class) family protein        | AM+K_not_in_group |
| Medtr7g093030 ranscription factor family protein     | AM+K_not_in_group |
| Medtr1g015810 DUF3511 domain protein                 | AM+K_not_in_group |
| Medtr2g087900 ellulose synthase H1-like protein      | AM+K_not_in_group |
| Medtr4g020620 ublicitin-conjugating enzyme E2        | AM+K_not_in_group |
| Medtr4g079110 glutaredoxin-C1 protein                | AM+K_not_in_group |
| Medtr1g044470 ransmembrane protein, putative         | AM+K_not_in_group |
| Medtr4g120030 : acid decarboxylase-like protein      | AM+K_not_in_group |
| Medtr1g075250 te hydrolase superfamily protein       | AM+K_not_in_group |
| Medtr1g075380 and hageman factor-like protein        | AM+K_not_in_group |
| Medtr1g075410 and hageman factor-like protein        | AM+K_not_in_group |
| Medtr1g099320 chitinase                              | AM+K_not_in_group |
| Medtr2g037760 DUF4228 domain protein                 | AM+K_not_in_group |
| Medtr2g101660 lant cadmium resistance protein        | AM+K_not_in_group |
| Medtr3g086670 clathrin assembly protein              | AM+K_not_in_group |
| Medtr4g094488 reticuline oxidase-like protein        | AM+K_not_in_group |
| Medtr5g090770 l-like regulatory protein, putative    | AM+K_not_in_group |
| Medtr7g072510 class III peroxidase                   | AM+K_not_in_group |
| Medtr8g022810 GDSL-like lipase/acylhydrolase         | AM+K_not_in_group |
| Medtr8g027745 finger protein ATL21A, putative        | AM+K_not_in_group |
| Medtr8g098945 ription factor (other strand read)     | AM+K_not_in_group |
| Medtr3g026820 hypothetical protein                   | AM+K_not_in_group |
| Medtr1g018930 hypothetical protein                   | AM+K_not_in_group |
| Medtr2g014470 DnaJ heat shock family protein         | AM+K_not_in_group |
| Medtr4g012860 ynthesis protein PDX1, putative        | AM+K_not_in_group |
| Medtr5g077260 OPI10-like protein                     | AM+K_not_in_group |
| Medtr5g081530 6 kDa class I heat shock protein       | AM+K_not_in_group |
| Medtr8g101480 hypothetical protein                   | AM+K_not_in_group |
| Medtr7g073520 ribosomal protein S6 kinase            | AM+K_not_in_group |
| Medtr5g093440 DUF4408 domain protein                 | AM+K_not_in_group |
| Medtr0216s0030 albumin-2 protein                     | AM+K_not_in_group |
| Medtr2g036650 plasma membrane H <sup>+</sup> -ATPase | AM+K_not_in_group |
| Medtr7g098760 sporter-like ABC domain protein        | AM+K_not_in_group |
| Medtr8g007670 alpha/beta fold hydrolase              | AM+K_not_in_group |
| Medtr2g072110 )-NBS-LRR class) family protein        | AM+K_not_in_group |
| Medtr3g074380 rter (SP) family MFS transporter       | AM+K_not_in_group |
| Medtr3g096760 amino acid permease                    | AM+K_not_in_group |

## diffusion\_prioritization\_ALL

|                |                                     |                   |
|----------------|-------------------------------------|-------------------|
| Medtr5g048470  | nthase/flavanone 3-hydroxylase      | AM+K_not_in_group |
| Medtr6g084900  | ochrome P450 family 71 protein      | AM+K_not_in_group |
| Medtr8g095560  | hypothetical protein                | AM+K_not_in_group |
| Medtr7g050990  | ne-Rich (NCR) secreted peptide      | AM+K_not_in_group |
| Medtr6g488220  | hypothetical protein                | AM+K_not_in_group |
| Medtr8g051640  | LK (receptor-like kinase) protein   | AM+K_not_in_group |
| Medtr8g088970  | receptor-like protein, putative     | AM+K_not_in_group |
| Medtr5g067530  | bidirectional sugar transporter     | AM+K_not_in_group |
| Medtr1g081550  | idylate deaminase family protein    | AM+K_not_in_group |
| Medtr2g063510  | A-3-methyladenine glycosylase I     | AM+K_not_in_group |
| Medtr4g088160  | re P450 family flavone synthase     | AM+K_not_in_group |
| Medtr3g021060  | -like acyl-esterase family protein  | AM+K_not_in_group |
| Medtr1g030320  | /sugar transporter family protein   | AM+K_not_in_group |
| Medtr8g090180  | bulin folding cofactor C, putative  | AM+K_not_in_group |
| Medtr3g108730  | 7-dehydrocholesterol reductase      | AM+K_not_in_group |
| Medtr1g081270  | EF-hand protein                     | AM+K_not_in_group |
| Medtr1g023140  | thioredoxin H-type 1 protein        | AM+K_not_in_group |
| Medtr5g016540  | osylation factor-like protein A1D   | AM+K_not_in_group |
| Medtr8g009710  | hypothetical protein                | AM+K_not_in_group |
| Medtr3g077930  | arbonic anhydrase family protein    | AM+K_not_in_group |
| Medtr1g087810  | DUF789 family protein               | AM+K_not_in_group |
| Medtr1g062780  | C2H2-type zinc finger protein       | AM+K_not_in_group |
| Medtr3g098320  | tory burst oxidase-like protein D   | AM+K_not_in_group |
| Medtr7g011470  | ucosyltransferase family protein    | AM+K_not_in_group |
| Medtr7g085200  | in-nucleotide phosphohydrolase      | AM+K_not_in_group |
| Medtr8g030880  | gibberellin 2-beta-dioxygenase      | AM+K_not_in_group |
| Medtr8g075830  | nase (flavanone-3-hydroxylase)      | AM+K_not_in_group |
| Medtr8g028565  | NRKY family transcription factor    | AM+K_not_in_group |
| Medtr4g085590  | oyl-CoA 3-O-methyltransferase       | AM+K_not_in_group |
| Medtr8g042770  | nc induced facilitator-like protein | AM+K_not_in_group |
| Medtr7g055630  | ankyrin repeat protein              | AM+K_not_in_group |
| Medtr5g013930  | transcription subunit 8, putative   | AM+K_not_in_group |
| Medtr2g042740  | pectin lyase superfamily protein    | AM+K_not_in_group |
| Medtr2g090390  | oside hydrolase family 5 protein    | AM+K_not_in_group |
| Medtr2g436340  | hypothetical protein                | AM+K_not_in_group |
| Medtr7g086690  | cation calcium exchanger            | AM+K_not_in_group |
| Medtr7g102260  | osylase/hydrolase family protein    | AM+K_not_in_group |
| Medtr7g103590  | ellulose synthase-like protein A1   | AM+K_not_in_group |
| Medtr8g070880  | LRR receptor-like kinase            | AM+K_not_in_group |
| Medtr1g066400  | !ING zinc finger protein, putative  | AM+K_not_in_group |
| Medtr7g013660  | copper chaperone                    | AM+K_not_in_group |
| Medtr2g090380  | alcium channel protein, putative    | AM+K_not_in_group |
| Medtr3g462130  | uclear antigen large form protein   | AM+K_not_in_group |
| Medtr2g017630  | hosphatase superfamily protein      | AM+K_not_in_group |
| Medtr8g099640  | n recognition complex subunit 1     | AM+K_not_in_group |
| Medtr0004s0510 | small heat shock protein            | AM+K_not_in_group |
| Medtr0020s0020 | it shock transcription factor B2A   | AM+K_not_in_group |
| Medtr1g071430  | optosis-promoting Bax1 protein      | AM+K_not_in_group |
| Medtr2g087660  | naJ-class molecular chaperone       | AM+K_not_in_group |
| Medtr3g008470  | folate/biopterin transporter        | AM+K_not_in_group |
| Medtr3g083480  | 3HC4 type (RING finger) protein     | AM+K_not_in_group |

diffusion\_prioritization\_ALL

|                |                                    |                   |
|----------------|------------------------------------|-------------------|
| Medtr4g078850  | DnaJ heat shock family protein     | AM+K_not_in_group |
| Medtr5g041310  | 3HC4 type (RING finger) protein    | AM+K_not_in_group |
| Medtr5g086350  | adation protein (UFD1), putative   | AM+K_not_in_group |
| Medtr6g061850  | 6 kDa class I heat shock protein   | AM+K_not_in_group |
| Medtr6g452990  | heat shock protein 81-2            | AM+K_not_in_group |
| Medtr8g020850  | E3 ubiquitin ligase                | AM+K_not_in_group |
| Medtr8g085870  | DUF1644 family protein             | AM+K_not_in_group |
| Medtr1g015910  | fructan exohydrolase               | AM+K_not_in_group |
| Medtr3g094120  | ransmembrane protein, putative     | AM+K_not_in_group |
| Medtr5g074860  | peroxidase family protein          | AM+K_not_in_group |
| Medtr1g041685  | 140 domain-like protein, putative  | AM+K_not_in_group |
| Medtr1g070515  | F-box/LRR protein, putative        | AM+K_not_in_group |
| Medtr1g084090  | cyclin-like protein                | AM+K_not_in_group |
| Medtr3g087980  | -chain fatty acid CoA synthetase   | AM+K_in_group     |
| Medtr3g094070  | enance complex-binding protein     | AM+K_not_in_group |
| Medtr5g078200  | 1,3-beta-glucosidase-like protein  | AM+K_not_in_group |
| Medtr6g032885  | ARM repeat protein                 | AM+K_not_in_group |
| Medtr7g100730  | stitutive active ROPs-like protein | AM+K_not_in_group |
| Medtr8g056900  | eotide exchange factor, putative   | AM+K_not_in_group |
| Medtr8g099795  | heat shock 70 kDa protein          | AM+K_not_in_group |
| Medtr3g061640  | te hydrolase superfamily protein   | AM+K_not_in_group |
| Medtr3g086220  | hypothetical protein               | AM+K_not_in_group |
| Medtr4g011930  | binding domain protein, putative   | AM+K_not_in_group |
| Medtr4g077700  | nethionine-tRNA ligase, putative   | AM+K_not_in_group |
| Medtr6g069850  | ne C oxidase biogenesis protein    | AM+K_not_in_group |
| Medtr8g075250  | ckpoint protein RAD17, putative    | AM+K_not_in_group |
| Medtr8g095210  | oly factor group protein, putative | AM+K_not_in_group |
| Medtr4g072220  | auxin-responsive family protein    | AM+K_not_in_group |
| Medtr5g084680  | IQ-domain protein                  | AM+K_not_in_group |
| Medtr0011s0280 | renal double bond reductase P1     | AM+K_not_in_group |
| Medtr1g067180  | glutathione S-transferase tau      | AM+K_not_in_group |
| Medtr3g117230  | particle triple-A ATPase protein   | AM+K_not_in_group |
| Medtr5g015020  | propane-1-carboxylate synthase     | AM+K_not_in_group |
| Medtr5g031390  | cohol dehydrogenase-like protein   | AM+K_not_in_group |
| Medtr5g087620  | ucosyltransferase family protein   | AM+K_not_in_group |
| Medtr7g089780  | yl hydrolase, alpha-glucosidase    | AM+K_not_in_group |
| Medtr7g100320  | glutathione S-transferase          | AM+K_not_in_group |
| Medtr0443s0040 | side hydrolase family 18 protein   | AM+K_not_in_group |
| Medtr8g012240  | DUF506 family protein              | AM+K_not_in_group |
| Medtr1g093920  | ransmembrane protein, putative     | AM+K_not_in_group |
| Medtr5g085980  | ransmembrane protein, putative     | AM+K_not_in_group |
| Medtr4g005830  | MAP kinase kinase                  | AM+K_not_in_group |
| Medtr4g100450  | ethylene response factor           | AM+K_not_in_group |
| Medtr7g051040  | ceptor-like kinase family protein  | AM+K_not_in_group |
| Medtr5g081160  | zinc ion-binding protein           | AM+K_not_in_group |
| Medtr4g072580  | auxin-responsive family protein    | AM+K_not_in_group |
| Medtr4g072820  | auxin-responsive family protein    | AM+K_not_in_group |
| Medtr7g108560  | netal-associated domain protein    | AM+K_not_in_group |
| Medtr2g062430  | DUF946 family protein              | AM+K_not_in_group |
| Medtr2g097770  | hypothetical protein               | AM+K_not_in_group |
| Medtr5g022380  | MFS transporter                    | AM+K_not_in_group |

## diffusion\_prioritization\_ALL

|                |                                     |                   |
|----------------|-------------------------------------|-------------------|
| Medtr3g465880  | e acyl-transferase family protein   | AM+K_not_in_group |
| Medtr8g068050  | lectin receptor kinase              | AM+K_not_in_group |
| Medtr1g087920  | ethylene response factor            | AM+K_not_in_group |
| Medtr7g089970  | i-dependent glutamate synthase      | AM+K_not_in_group |
| Medtr4g113650  | chrome P450 family 709 protein      | AM+K_not_in_group |
| Medtr7g019230  | cell division cycle-like protein    | AM+K_not_in_group |
| Medtr8g094690  | cription factor TGA5-like protein   | AM+K_not_in_group |
| Medtr8g013950  | \ transcription factor-like protein | AM+K_not_in_group |
| Medtr2g042130  | subtilisin-like serine protease     | AM+K_not_in_group |
| Medtr5g011390  | l microtubule-associated protein    | AM+K_not_in_group |
| Medtr8g040640  | hypothetical protein                | AM+K_not_in_group |
| Medtr8g007270  | NRKY family transcription factor    | AM+K_not_in_group |
| Medtr5g044220  | osphate/phosphate translocator      | AM+K_not_in_group |
| Medtr0020s0130 | ubiquitin-protein ligase XBOS32     | AM+K_not_in_group |
| Medtr3g104560  | cytochrome P450 family protein      | AM+K_not_in_group |
| Medtr4g086330  | fruit weight 2.2 protein            | AM+K_not_in_group |
| Medtr4g097110  | osyl hydrolase family 43 protein    | AM+K_not_in_group |
| Medtr4g101280  | Lipid transfer protein              | AM+K_not_in_group |
| Medtr6g066230  | D-binding rossmann fold protein     | AM+K_not_in_group |
| Medtr7g093950  | ellin receptor GID1c-like protein   | AM+K_not_in_group |
| Medtr8g037880  | enase FMO GS-OX-like protein        | AM+K_not_in_group |
| Medtr8g467000  | -3-acetic acid-amido synthetase     | AM+K_not_in_group |
| Medtr1g032100  | ankyrin repeat plant-like protein   | AM+K_not_in_group |
| Medtr4g068560  | hypothetical protein                | AM+K_not_in_group |
| Medtr5g083690  | sponse-like dehydration-protein     | AM+K_not_in_group |
| Medtr8g091590  | hypothetical protein                | AM+K_not_in_group |
| Medtr1g090170  | domain class transcription factor   | AM+K_not_in_group |
| Medtr5g067060  | s transhydroxymethyltransferase     | AM+K_not_in_group |
| Medtr3g095540  | stem I reaction center subunit N    | AM+K_not_in_group |
| Medtr1g015860  | cytochrome P450 family protein      | AM+K_not_in_group |
| Medtr4g023950  | DUF1442 family protein              | AM+K_not_in_group |
| Medtr4g071900  | microtubule motor family protein    | AM+K_not_in_group |
| Medtr8g056020  | i repeat RF-like protein, putative  | AM+K_in_group     |
| Medtr4g107630  | al membrane HPP family protein      | AM+K_not_in_group |
| Medtr4g099400  | expansin-B1-like protein            | AM+K_not_in_group |
| Medtr1g012470  | ethylene response factor            | AM+K_not_in_group |
| Medtr1g020090  | ie carboxypeptidase-like protein    | AM+K_not_in_group |
| Medtr3g060730  | calcineurin B-like protein          | AM+K_not_in_group |
| Medtr4g013050  | te hydroxycinnamoyltransferase      | AM+K_not_in_group |
| Medtr4g014770  | ce protein (TIR-NBS-LRR class)      | AM+K_not_in_group |
| Medtr4g072840  | auxin-responsive family protein     | AM+K_not_in_group |
| Medtr4g077630  | ceptor-like kinase family protein   | AM+K_not_in_group |
| Medtr4g081300  | n, A TM vesicle-mediated sorter     | AM+K_not_in_group |
| Medtr5g019970  | membrane-like protein, putative     | AM+K_not_in_group |
| Medtr5g075380  | ranscription factor family protein  | AM+K_not_in_group |
| Medtr6g014190  | ucosyltransferase family protein    | AM+K_not_in_group |
| Medtr7g063320  | y)-binding rossmann-fold protein    | AM+K_not_in_group |
| Medtr7g086010  | oside hydrolase family 3 protein    | AM+K_not_in_group |
| Medtr8g085400  | drate-binding X8 domain protein     | AM+K_not_in_group |
| Medtr2g006330  | ring-like kinase 2 family protein   | AM+K_not_in_group |
| Medtr1g075460  | stid developmental protein DAG      | AM+K_not_in_group |

## diffusion\_prioritization\_ALL

|               |                                     |                   |
|---------------|-------------------------------------|-------------------|
| Medtr2g027140 | C14 cytosolic factor-like protein   | AM+K_not_in_group |
| Medtr3g065380 | itin-protein ligase ARI7, putative  | AM+K_not_in_group |
| Medtr3g105390 | horibonuclease dicer-like protein   | AM+K_not_in_group |
| Medtr3g105990 | d RNA polymerase subunit beta       | AM+K_not_in_group |
| Medtr3g110417 | TPR repeat protein                  | AM+K_not_in_group |
| Medtr3g112070 | denyltransferase family protein     | AM+K_not_in_group |
| Medtr4g079860 | osphoenolpyruvate carboxylase       | AM+K_not_in_group |
| Medtr8g106700 | ngation factor Tu family protein    | AM+K_not_in_group |
| Medtr5g089110 | F-box plant-like protein            | AM+K_not_in_group |
| Medtr2g020210 | cyclin-dependent kinase             | AM+K_not_in_group |
| Medtr8g095030 | LRR receptor-like kinase            | AM+K_not_in_group |
| Medtr8g079520 | -NBS-LRR class) family protein      | AM+K_not_in_group |
| Medtr7g070910 | ucosyltransferase family protein    | AM+K_not_in_group |
| Medtr4g063935 | kinase 1B                           | AM+K_not_in_group |
| Medtr4g037055 | hypothetical protein                | AM+K_not_in_group |
| Medtr1g085090 | peptide/nitrate transporter         | AM+K_not_in_group |
| Medtr4g079700 | -like acyl-esterase family protein  | AM+K_not_in_group |
| Medtr4g100550 | isassociated leucine zipper protein | AM+K_not_in_group |
| Medtr4g083940 | plant/F14N23-6 protein              | AM+K_not_in_group |
| Medtr7g023560 | C2H2-type zinc finger protein       | AM+K_not_in_group |
| Medtr1g095510 | ubiquitin-conjugating enzyme E2     | AM+K_not_in_group |
| Medtr2g025470 | light induced-like protein          | AM+K_not_in_group |
| Medtr2g090020 | wound-responsive family protein     | AM+K_not_in_group |
| Medtr3g077030 | PB1 domain protein                  | AM+K_not_in_group |
| Medtr3g087230 | TLD-domain nucleolar protein        | AM+K_not_in_group |
| Medtr3g096520 | rotein ligase RGLG2-like protein    | AM+K_not_in_group |
| Medtr3g099650 | -H2 zinc finger protein, putative   | AM+K_not_in_group |
| Medtr3g113620 | ransmembrane protein, putative      | AM+K_not_in_group |
| Medtr3g463720 | RING/U-box protein                  | AM+K_not_in_group |
| Medtr4g109310 | -sensitive factor adaptor protein   | AM+K_not_in_group |
| Medtr7g016840 | RING-finger ubiquitin ligase        | AM+K_not_in_group |
| Medtr7g109460 | G/FYVE/PHD zinc finger protein      | AM+K_not_in_group |
| Medtr8g064170 | le dehydrogenase family protein     | AM+K_not_in_group |
| Medtr1g074160 | auxin-induced 5NG4-like protein     | AM+K_not_in_group |
| Medtr2g088980 | LK (receptor-like kinase) protein   | AM+K_not_in_group |
| Medtr3g104930 | subtilisin-like serine protease     | AM+K_not_in_group |
| Medtr6g016810 | side hydrolase family 81 protein    | AM+K_not_in_group |
| Medtr7g082640 | Lipid transfer protein              | AM+K_not_in_group |
| Medtr8g014700 | inase plant-like protein, putative  | AM+K_not_in_group |
| Medtr3g025330 | PHD zinc finger protein, putative   | AM+K_not_in_group |
| Medtr1g052640 | ess up-regulated Nod 19 protein     | AM+K_not_in_group |
| Medtr1g026410 | ulti-copper oxidase-like protein    | AM+K_not_in_group |
| Medtr4g022410 | 24-type RING zinc finger protein    | AM+K_not_in_group |
| Medtr4g132320 | ulti-copper oxidase-like protein    | AM+K_not_in_group |
| Medtr5g097420 | trate-binding X8 domain protein     | AM+K_not_in_group |
| Medtr8g017100 | DUF4228 domain protein              | AM+K_not_in_group |
| Medtr1g026110 | ringolide-induced protein 14-1-1    | AM+K_not_in_group |
| Medtr7g096150 | otosystem II reaction center W      | AM+K_not_in_group |
| Medtr5g086120 | LysM receptor kinase K1B            | AM+K_not_in_group |
| Medtr8g020700 | acid carboxyl methyltransferase     | AM+K_not_in_group |
| Medtr1g085980 | DHHC-type zinc finger protein       | AM+K_not_in_group |

## diffusion\_prioritization\_ALL

|                                                   |                   |
|---------------------------------------------------|-------------------|
| Medtr7g117355 /sine N-methyltransferase ATX3      | AM+K_not_in_group |
| Medtr4g036575 ceptor-like kinase family protein   | AM+K_not_in_group |
| Medtr3g464040 alpha/beta fold hydrolase           | AM+K_not_in_group |
| Medtr4g015270 hypothetical protein                | AM+K_not_in_group |
| Medtr2g010450 ymbiotic ammonium transporter       | AM+K_not_in_group |
| Medtr2g089010 ransmembrane protein, putative      | AM+K_not_in_group |
| Medtr4g094942 carboxy-terminal domain cyclin      | AM+K_not_in_group |
| Medtr5g009130 hydroxyproline-rich glycoprotein    | AM+K_not_in_group |
| Medtr5g076950 expansin A1                         | AM+K_not_in_group |
| Medtr6g092720 hosphatase/phosphodiesterase        | AM+K_not_in_group |
| Medtr8g075010 aspartyl protease family protein    | AM+K_not_in_group |
| Medtr8g085720 osyl hydrolase family 17 protein    | AM+K_not_in_group |
| Medtr8g098260 ictor S-II, central domain protein  | AM+K_not_in_group |
| Medtr4g017640 illium wilt resistance-like protein | AM+K_not_in_group |
| Medtr4g124470 e/saccharopine dehydrogenase        | AM+K_not_in_group |
| Medtr8g101330 ylase biotin carboxylase subunit    | AM+K_in_group     |
| Medtr7g098690 iC transporter-like family-protein  | AM+K_not_in_group |
| Medtr1g115345 C2H2-type zinc finger protein       | AM+K_not_in_group |
| Medtr4g024370 DUF1442 family protein              | AM+K_not_in_group |
| Medtr2g039620 (LH) DNA-binding family protein     | AM+K_not_in_group |
| Medtr4g085070 c amino-terminal domain protein     | AM+K_not_in_group |
| Medtr8g036920 ir/toleration DRT100-like protein   | AM+K_not_in_group |
| Medtr5g092150 cytochrome P450 family protein      | AM+K_in_group     |
| Medtr7g115350 zein-binding protein                | AM+K_not_in_group |
| Medtr0009s0370 rter (SP) family MFS transporter   | AM+K_not_in_group |
| Medtr5g065980 ra hydrolase superfamily protein    | AM+K_not_in_group |
| Medtr2g036440 ceptor-like kinase family protein   | AM+K_in_group     |
| Medtr8g073120 bunit 11 RING-H2 finger protein     | AM+K_not_in_group |
| Medtr3g114030 -related thaumatin family protein   | AM+K_not_in_group |
| Medtr1g072450 endoglucanase inhibitor protein     | AM+K_not_in_group |
| Medtr4g029600 extensin-like repeat protein        | AM+K_not_in_group |
| Medtr5g098480 ransmembrane protein, putative      | AM+K_not_in_group |
| Medtr3g033110 ase resistance protein, putative    | AM+K_not_in_group |
| Medtr3g088645 inone oxidoreductase subunit M      | AM+K_not_in_group |
| Medtr2g034960 B-type response regulator           | AM+K_not_in_group |
| Medtr1g007060 ie complex exonuclease RRP46        | AM+K_not_in_group |
| Medtr4g071030 t calmodulin-binding-like protein   | AM+K_not_in_group |
| Medtr4g073220 receptor-like kinase                | AM+K_not_in_group |
| Medtr2g098310 tion factor bHLH122-like protein    | AM+K_not_in_group |
| Medtr4g061610 ionphototropic hypocotyl protein    | AM+K_not_in_group |
| Medtr2g035320 ABA-responsive protein              | AM+K_not_in_group |
| Medtr4g010320 20/alpha crystallin family protein  | AM+K_not_in_group |
| Medtr2g009980 e transporter OPT family protein    | AM+K_not_in_group |
| Medtr1g094035 uced plasma membrane protein        | AM+K_not_in_group |
| Medtr4g017650 dylethanolamine-binding protein     | AM+K_not_in_group |
| Medtr7g093170 seed maturation protein             | AM+K_not_in_group |
| Medtr7g068110 hypothetical protein                | AM+K_not_in_group |
| Medtr8g105740 sphate synthase domain protein      | AM+K_not_in_group |
| Medtr7g114680 WNK kinase                          | AM+K_not_in_group |
| Medtr1g028330 ase/6-phosphogluconolactonase       | AM+K_not_in_group |
| Medtr1g040360 sieve element occlusion protein     | AM+K_not_in_group |

diffusion\_prioritization\_ALL

|                |                                                        |                   |
|----------------|--------------------------------------------------------|-------------------|
| Medtr1g098580  | xin superfamily protein, putative                      | AM+K_not_in_group |
| Medtr2g012470  | o acid transporter family protein                      | AM+K_not_in_group |
| Medtr2g016680  | hypothetical protein                                   | AM+K_not_in_group |
| Medtr3g072350  | WEB family plant protein                               | AM+K_not_in_group |
| Medtr3g072870  | ProtKB/Swiss-Prot;Acc:Q9FEL6]                          | AM+K_not_in_group |
| Medtr3g077750  | Dof domain zinc finger protein                         | AM+K_not_in_group |
| Medtr3g084340  | γ-oxo-L-homocysteine hydrolase                         | AM+K_not_in_group |
| Medtr3g112480  | auxin-induced 5NG4-like protein                        | AM+K_not_in_group |
| Medtr4g008200  | chitinase protein O-fucosyltransferase                 | AM+K_not_in_group |
| Medtr4g055520  | cellulose synthase-like protein A1                     | AM+K_not_in_group |
| Medtr4g081100  | plastocyanin-like domain protein                       | AM+K_not_in_group |
| Medtr4g091380  | chitinase resistance protein, putative                 | AM+K_not_in_group |
| Medtr4g118770  | Na <sup>+</sup> /H <sup>+</sup> exchanger 1            | AM+K_not_in_group |
| Medtr5g083980  | WEB family plant protein                               | AM+K_not_in_group |
| Medtr5g086030  | LysM receptor kinase K1B                               | AM+K_not_in_group |
| Medtr7g012950  | 6-dehydrogenase family protein                         | AM+K_not_in_group |
| Medtr7g032660  | sieve element occlusion protein                        | AM+K_not_in_group |
| Medtr7g112580  | chitinase/pectinesterase inhibitor                     | AM+K_not_in_group |
| Medtr8g005980  | aspartic acid-like malate dehydrogenase                | AM+K_not_in_group |
| Medtr8g014330  | stream target of agl15-4 protein                       | AM+K_not_in_group |
| Medtr8g044160  | oxaloacetate reductase family protein                  | AM+K_not_in_group |
| Medtr8g097030  | transmembrane protein, putative                        | AM+K_not_in_group |
| Medtr3g062570  | LRR receptor-like kinase                               | AM+K_not_in_group |
| Medtr4g116277  | plant/F18G18-20 protein                                | AM+K_not_in_group |
| Medtr4g101750  | translation elongation factor EF protein               | AM+K_not_in_group |
| Medtr8g078270  | calcium-binding family protein                         | AM+K_not_in_group |
| Medtr3g106830  | hypothetical protein                                   | AM+K_not_in_group |
| Medtr4g097880  | receptor-like kinase family protein                    | AM+K_not_in_group |
| Medtr4g078770  | hypothetical protein                                   | AM+K_not_in_group |
| Medtr1g106430  | ethylene responsive NPH3 family protein                | AM+K_not_in_group |
| Medtr4g129760  | hypothetical protein                                   | AM+K_not_in_group |
| Medtr5g013550  | serine/threonine protein kinase 1(SNF1)-related kinase | AM+K_not_in_group |
| Medtr0059s0170 | serine/threonine protein kinase P450 family 71 protein | AM+K_not_in_group |
| Medtr5g024510  | phosphatase/kinase IRE1-like protein                   | AM+K_not_in_group |
| Medtr3g045440  | signal transduction protein sbq-like protein           | AM+K_not_in_group |
| Medtr7g087410  | MATE efflux family protein                             | AM+K_not_in_group |
| Medtr1g094250  | hypothetical protein                                   | AM+K_not_in_group |
| Medtr1g106060  | hypothetical protein                                   | AM+K_not_in_group |
| Medtr2g008010  | hypothetical protein                                   | AM+K_not_in_group |
| Medtr7g011330  | ion transporter PHO1-like protein                      | AM+K_not_in_group |
| Medtr3g093710  | receptor-like kinase                                   | AM+K_not_in_group |
| Medtr8g096020  | transmembrane protein, putative                        | AM+K_not_in_group |
| Medtr3g085460  | ELMO/CED-12 family protein                             | AM+K_not_in_group |
| Medtr4g011300  | WD-40 repeat protein, putative                         | AM+K_not_in_group |
| Medtr2g091170  | chitin-binding protein SBP65, putative                 | AM+K_not_in_group |
| Medtr7g033775  | oleosin                                                | AM+K_not_in_group |
| Medtr7g103520  | protein, putative (other strand read)                  | AM+K_not_in_group |
| Medtr8g465990  | lectin kinase family protein                           | AM+K_not_in_group |
| Medtr4g121930  | hypothetical protein                                   | AM+K_not_in_group |
| Medtr7g018500  | TCP family transcription factor                        | AM+K_not_in_group |
| Medtr4g023260  | protein (TIR-NBS-LRR class), putative                  | AM+K_not_in_group |



## diffusion\_prioritization\_ALL

|                                                   |                   |
|---------------------------------------------------|-------------------|
| Medtr5g006710 odienoate reductase-like protein    | AM+K_not_in_group |
| Medtr3g064840 transcription factor KAN2           | AM+K_not_in_group |
| Medtr5g019430 UPF0496 plant-like protein          | AM+K_not_in_group |
| Medtr1g079770 rotein sorting-associated protein   | AM+K_not_in_group |
| Medtr3g100120 ended RNA-binding motif protein     | AM+K_not_in_group |
| Medtr3g102040 polyadenylate-binding protein       | AM+K_not_in_group |
| Medtr4g005280 ating inorganic pyrophosphatase     | AM+K_not_in_group |
| Medtr4g108140 calmodulin-binding motif protein    | AM+K_not_in_group |
| Medtr4g124880 xoxoacyl-(acyl carrier) synthase II | AM+K_not_in_group |
| Medtr5g016260 aspartyl protease family protein    | AM+K_not_in_group |
| Medtr6g074910 transmembrane 9 family protein      | AM+K_not_in_group |
| Medtr7g085240 beta-trefoil lectin domain protein  | AM+K_not_in_group |
| Medtr7g093740 cer-associated Mic1-like protein    | AM+K_not_in_group |
| Medtr8g016270 nbrane protein 70 family protein    | AM+K_not_in_group |
| Medtr2g090060 ase-cyclodeaminase-like protein     | AM+K_not_in_group |
| Medtr2g092930 osphoenolpyruvate carboxylase       | AM+K_not_in_group |
| Medtr5g025650cohol oxidase FAO1-like protein      | AM+K_not_in_group |
| Medtr8g078200 'SUR4 membrane family protein       | AM+K_not_in_group |
| Medtr2g105060 VRKY family transcription factor    | AM+K_not_in_group |
| Medtr7g093160 seed maturation protein             | AM+K_not_in_group |
| Medtr8g028150 ranscription factor family protein  | AM+K_not_in_group |
| Medtr8g106140 dehydrin                            | AM+K_not_in_group |
| Medtr3g102470 F-box GID2-like protein             | AM+K_not_in_group |
| Medtr1g041285 id calcium-binding family protein   | AM+K_not_in_group |
| Medtr3g082150 enyltransferase family protein      | AM+K_not_in_group |
| Medtr4g130390 ceptor-like kinase family protein   | AM+K_not_in_group |
| Medtr7g015700 ne-Rich (NCR) secreted peptide      | AM+K_not_in_group |
| Medtr5g093860 ein, MAP65/ASE1 family protein      | AM+K_not_in_group |
| Medtr5g099250 hypothetical protein                | AM+K_not_in_group |
| Medtr7g073720 hypothetical protein                | AM+K_not_in_group |
| Medtr2g023430 protein ubiquitin domain protein    | AM+K_not_in_group |
| Medtr3g051460 lfoxide reductase family protein    | AM+K_not_in_group |
| Medtr7g005440 -like zinc ribbon domain protein    | AM+K_not_in_group |
| Medtr7g083570 tein/ABA-responsive-like protein    | AM+K_not_in_group |
| Medtr8g042780 nc induced facilitator-like protein | AM+K_not_in_group |
| Medtr3g077110 myb transcription factor            | AM+K_not_in_group |
| Medtr2g009480 osin group485 secreted peptide      | AM+K_not_in_group |
| Medtr6g015975 MADS-box transcription factor       | AM+K_not_in_group |
| Medtr4g064887 y)-binding rossmann-fold protein    | AM+K_in_group     |
| Medtr8g104890 lant cadmium resistance protein     | AM+K_not_in_group |
| Medtr1g116170 y40 cysteine-rich domain protein    | AM+K_not_in_group |
| Medtr3g117120 ZIP transcription factor bZIP124    | AM+K_not_in_group |
| Medtr4g082830 nodulin-like protein                | AM+K_not_in_group |
| Medtr4g114340 peptide/nitrate transporter         | AM+K_not_in_group |
| Medtr5g008710 ated development protein DET1       | AM+K_not_in_group |
| Medtr5g012850 myltetrahydrofolate deformylase     | AM+K_not_in_group |
| Medtr5g038420 TWIN LOV protein                    | AM+K_not_in_group |
| Medtr5g095740 ear transcription factor Y protein  | AM+K_not_in_group |
| Medtr6g065370 CXE carboxylesterase                | AM+K_not_in_group |
| Medtr7g109510 BZIP transcription factor           | AM+K_not_in_group |
| Medtr7g118320 xaffeic acid O-methyltransferase    | AM+K_not_in_group |

## diffusion\_prioritization\_ALL

|                |                                     |                   |
|----------------|-------------------------------------|-------------------|
| Medtr3g110205  | domain class transcription factor   | AM+K_not_in_group |
| Medtr1g080350  | ponse/antifungal domain protein     | AM+K_not_in_group |
| Medtr1g083900  | hypothetical protein                | AM+K_not_in_group |
| Medtr1g092690  | GDSL-like lipase/acylhydrolase      | AM+K_not_in_group |
| Medtr5g007370  | myb transcription factor            | AM+K_not_in_group |
| Medtr7g079010  | NRKY family transcription factor    | AM+K_not_in_group |
| Medtr7g098510  | cyclin-like F-box protein           | AM+K_not_in_group |
| Medtr4g094898  | oyl-CoA 3-O-methyltransferase       | AM+K_not_in_group |
| Medtr1g022315  | rter (SP) family MFS transporter    | AM+K_not_in_group |
| Medtr3g092200  | ransmembrane protein, putative      | AM+K_not_in_group |
| Medtr4g100600  | xxygenase family oxidoreductase     | AM+K_not_in_group |
| Medtr5g056140  | S1/P1 nuclease family protein       | AM+K_not_in_group |
| Medtr6g059650  | psin inhibitor / Alpha-fucosidase   | AM+K_in_group     |
| Medtr6g488190  | hypothetical protein                | AM+K_not_in_group |
| Medtr8g064870  | -glucosyltransferase-like protein   | AM+K_not_in_group |
| Medtr8g068330  | ucosyltransferase family protein    | AM+K_not_in_group |
| Medtr4g087040  | kinesin motor domain protein        | AM+K_not_in_group |
| Medtr2g025160  | ligand-gated ion channel protein    | AM+K_not_in_group |
| Medtr5g014600  | ILH) DNA-binding family protein     | AM+K_not_in_group |
| Medtr4g130270  | e-responsive transcription factor   | AM+K_not_in_group |
| Medtr2g099175  | peroxidase family protein           | AM+K_not_in_group |
| Medtr3g086610  | slicing protein (other strand read) | AM+K_not_in_group |
| Medtr1g087230  | n ABC transporter family protein    | AM+K_not_in_group |
| Medtr6g026830  | hypothetical protein                | AM+K_not_in_group |
| Medtr4g024620  | imate 1-carboxyvinyltransferase     | AM+K_not_in_group |
| Medtr2g019740  | r C-x8-C-x5-C-x3-H type protein     | AM+K_not_in_group |
| Medtr4g073140  | ase-like domain kinase, putative    | AM+K_not_in_group |
| Medtr8g013830  | ransmembrane protein, putative      | AM+K_not_in_group |
| Medtr8g098665  | bunit 11 RING-H2 finger protein     | AM+K_not_in_group |
| Medtr3g092460  | class II small heat-shock protein   | AM+K_not_in_group |
| Medtr3g104550  | eat shock transcription factor A3   | AM+K_not_in_group |
| Medtr4g010130  | it-binding protein site 2 protease  | AM+K_not_in_group |
| Medtr4g092110  | o-3-sulfolactate synthase ComA      | AM+K_not_in_group |
| Medtr5g064060  | 6 kDa class I heat shock protein    | AM+K_not_in_group |
| Medtr7g109280  | hypothetical protein                | AM+K_not_in_group |
| Medtr7g451210  | etoxification superfamily protein   | AM+K_not_in_group |
| Medtr1g009030  | plant/F12B17-70 protein             | AM+K_not_in_group |
| Medtr3g076610  | rotein phosphatase 2c, putative     | AM+K_not_in_group |
| Medtr5g017860  | peroxidase family protein           | AM+K_not_in_group |
| Medtr7g104680  | sulfur assembly IscA-like protein   | AM+K_not_in_group |
| Medtr1g016490  | BEL1-like homeodomain protein       | AM+K_not_in_group |
| Medtr3g085890  | ctase complex 1 MLRQ subunit        | AM+K_not_in_group |
| Medtr2g034020  | in tyrosine kinase family protein   | AM+K_not_in_group |
| Medtr4g113710  | receptor-like kinase                | AM+K_not_in_group |
| Medtr4g107650  | ox leucine zipper family protein    | AM+K_not_in_group |
| Medtr0090s0020 | ocus lectin kinase family protein   | AM+K_not_in_group |
| Medtr4g103760  | domain, G-beta repeat protein       | AM+K_not_in_group |
| Medtr4g030200  | initiation factor SUI1-like protein | AM+K_not_in_group |
| Medtr7g112963  | epoxide hydrolase                   | AM+K_not_in_group |
| Medtr1g070120  | yclopropanecarboxylate oxidase      | AM+K_not_in_group |
| Medtr1g099640  | etal ion-binding protein, putative  | AM+K_not_in_group |

## diffusion\_prioritization\_ALL

|                                                   |                   |
|---------------------------------------------------|-------------------|
| Medtr1g112230 late diphosphate decarboxylase      | AM+K_not_in_group |
| Medtr2g008225 ucosyltransferase family protein    | AM+K_not_in_group |
| Medtr2g023680 ne P450 family monooxygenase        | AM+K_not_in_group |
| Medtr2g028610 ATRAD3, putative                    | AM+K_not_in_group |
| Medtr2g041430 wth-regulating factor-like protein  | AM+K_not_in_group |
| Medtr2g062920 late synthase alpha chain protein   | AM+K_not_in_group |
| Medtr2g103650 ycoside hydrolase family protein    | AM+K_not_in_group |
| Medtr3g087540 pollen Ole e I family allergen      | AM+K_not_in_group |
| Medtr3g091190 phosphomevalonate kinase            | AM+K_not_in_group |
| Medtr4g022290 e acyl-transferase family protein   | AM+K_not_in_group |
| Medtr4g039740 DUF642 family protein               | AM+K_not_in_group |
| Medtr4g059630 /late embryogenesis-like protein    | AM+K_not_in_group |
| Medtr4g059670 /late embryogenesis-like protein    | AM+K_not_in_group |
| Medtr4g070530 DUF241 domain protein               | AM+K_not_in_group |
| Medtr4g088870 tein ligase RMA1H1-like protein     | AM+K_not_in_group |
| Medtr4g094828 e acyl-transferase family protein   | AM+K_not_in_group |
| Medtr4g117090 endoglucanase inhibitor protein     | AM+K_not_in_group |
| Medtr5g010390 ng (CaLB domain) family protein     | AM+K_not_in_group |
| Medtr5g041080 ribonuclease T2 family protein      | AM+K_not_in_group |
| Medtr5g041095 ribonuclease T2 family protein      | AM+K_not_in_group |
| Medtr6g027540 ng (CaLB domain) family protein     | AM+K_not_in_group |
| Medtr7g069930 hypothetical protein                | AM+K_not_in_group |
| Medtr8g095040 ammonium transporter 1 protein      | AM+K_in_group     |
| Medtr2g076350 PH-GRAM-GEM domain protein          | AM+K_not_in_group |
| Medtr1g100130 ductase/ferric-chelate reductase    | AM+K_not_in_group |
| Medtr1g074370 responsive transcription factor 1B  | AM+K_not_in_group |
| Medtr3g086640 hypothetical protein                | AM+K_not_in_group |
| Medtr7g007010 seed specific protein Bn15D17A      | AM+K_not_in_group |
| Medtr5g020990 te hydrolase superfamily protein    | AM+K_not_in_group |
| Medtr7g065660 , amino-terminal domain protein     | AM+K_not_in_group |
| Medtr8g098390 notif DNA-binding family protein    | AM+K_not_in_group |
| Medtr3g438070 transcription factor                | AM+K_not_in_group |
| Medtr4g035855 e/pectin methylsterase inhibitor    | AM+K_not_in_group |
| Medtr6g015905 thase [UDP-forming]-like protein    | AM+K_not_in_group |
| Medtr2g009890 MADS-box transcription factor       | AM+K_not_in_group |
| Medtr7g089080 cyclin                              | AM+K_not_in_group |
| Medtr1g051120 auxin-induced 5NG4-like protein     | AM+K_not_in_group |
| Medtr4g073040 letoxification superfamily protein  | AM+K_not_in_group |
| Medtr4g088225 ellulose synthase-like protein D3   | AM+K_not_in_group |
| Medtr1g077790 plastocyanin-like domain protein    | AM+K_not_in_group |
| Medtr1g030600 auxin-induced 5NG4-like protein     | AM+K_not_in_group |
| Medtr2g099010 salt tolerance-like protein         | AM+K_not_in_group |
| Medtr3g072520 rA-like transporter family protein  | AM+K_not_in_group |
| Medtr5g022470 osmosensor histidine kinase         | AM+K_not_in_group |
| Medtr7g017630 o acid transporter family protein   | AM+K_not_in_group |
| Medtr1g021635 -rich receptor-kinase-like protein  | AM+K_not_in_group |
| Medtr2g034260 GRAS family transcription factor    | AM+K_in_group     |
| Medtr7g032640 ta-hydrolase superfamily protein    | AM+K_not_in_group |
| Medtr1g101550 sive transcription factor ERF026    | AM+K_not_in_group |
| Medtr2g016110 DUF640 family protein               | AM+K_not_in_group |
| Medtr2g081820 l transcription factor-like protein | AM+K_not_in_group |

## diffusion\_prioritization\_ALL

|               |                                     |                   |
|---------------|-------------------------------------|-------------------|
| Medtr4g127840 | tyrosine kinase family protein      | AM+K_not_in_group |
| Medtr5g066180 | MADS-box transcription factor       | AM+K_not_in_group |
| Medtr1g072260 | ding protein of 41 kDa protein A    | AM+K_not_in_group |
| Medtr3g460780 | clin-like arabinogalactan protein   | AM+K_not_in_group |
| Medtr1g115900 | cationic peroxidase                 | AM+K_not_in_group |
| Medtr1g031580 | receptor-like kinase                | AM+K_not_in_group |
| Medtr7g106710 | lin-domain kinase CDPK protein      | AM+K_not_in_group |
| Medtr4g124000 | ABC transporter B family protein    | AM+K_not_in_group |
| Medtr5g015880 | oundaries (LOB) domain protein      | AM+K_not_in_group |
| Medtr4g100420 | ethylene response factor            | AM+K_not_in_group |
| Medtr7g098610 | ceptor-like kinase family protein   | AM+K_not_in_group |
| Medtr1g086950 | ein, putative (other strand read)   | AM+K_not_in_group |
| Medtr3g011370 | main disease resistance protein     | AM+K_not_in_group |
| Medtr1g067630 | 125 kDa kinesin-like protein        | AM+K_not_in_group |
| Medtr3g041560 | ceptor-like kinase family protein   | AM+K_not_in_group |
| Medtr1g056560 | syntaxin of plants 122 protein      | AM+K_not_in_group |
| Medtr1g099810 | etoxification superfamily protein   | AM+K_not_in_group |
| Medtr2g080030 | hypothetical protein                | AM+K_not_in_group |
| Medtr2g097620 | e (RING finger) protein, putative   | AM+K_not_in_group |
| Medtr3g023720 | re-sensitive factor adaptor protein | AM+K_not_in_group |
| Medtr4g128470 | DUF761 domain protein               | AM+K_not_in_group |
| Medtr8g092580 | hypothetical protein                | AM+K_not_in_group |
| Medtr1g070170 | lication factor CDT1-like protein   | AM+K_not_in_group |
| Medtr4g094800 | hypothetical protein                | AM+K_not_in_group |
| Medtr2g082930 | hypothetical protein                | AM+K_not_in_group |
| Medtr8g009820 | t alkenal double bond reductase     | AM+K_not_in_group |
| Medtr2g013920 | elix DNA-binding domain protein     | AM+K_not_in_group |
| Medtr4g074860 | ranscription factor 3C-like protein | AM+K_not_in_group |
| Medtr3g098160 | zyme A thioesterase-like protein    | AM+K_not_in_group |
| Medtr8g020510 | AP2 domain transcription factor     | AM+K_not_in_group |
| Medtr1g013110 | eptidase family protein, putative   | AM+K_not_in_group |
| Medtr1g071780 | nce-associated protein SAG102       | AM+K_not_in_group |
| Medtr1g084740 | rrolidone-carboxylate peptidase     | AM+K_not_in_group |
| Medtr1g098870 | ike DNA-binding domain protein      | AM+K_not_in_group |
| Medtr2g041510 | F-box protein                       | AM+K_not_in_group |
| Medtr3g086790 | ssociated leucine zipper protein    | AM+K_not_in_group |
| Medtr3g091770 | ransmembrane protein, putative      | AM+K_not_in_group |
| Medtr4g057500 | osyltransferase family 47 protein   | AM+K_not_in_group |
| Medtr4g087080 | hypothetical protein                | AM+K_not_in_group |
| Medtr4g099100 | endoribonuclease-B-like protein     | AM+K_not_in_group |
| Medtr5g008210 | eroxide induced protein, putative   | AM+K_not_in_group |
| Medtr5g023740 | ndent isocitrate dehydrogenase      | AM+K_not_in_group |
| Medtr5g034120 | phosphatidylinositol 3-kinase       | AM+K_not_in_group |
| Medtr1g036490 | affeic acid O-methyltransferase     | AM+K_not_in_group |
| Medtr5g007640 | umarate:CoA ligase-like protein     | AM+K_not_in_group |
| Medtr8g035810 | cytochrome P450 family protein      | AM+K_not_in_group |
| Medtr1g088680 | n ABC transporter family protein    | AM+K_not_in_group |
| Medtr1g090150 | , amino-terminal domain protein     | AM+K_not_in_group |
| Medtr3g118390 | Chitinase (Class I) / Hevein        | AM+K_not_in_group |
| Medtr4g070370 | luctase-like Bet protein, putative  | AM+K_in_group     |
| Medtr5g010640 | -related thaumatin family protein   | AM+K_in_group     |

## diffusion\_prioritization\_ALL

|                                                    |                   |
|----------------------------------------------------|-------------------|
| Medtr5g074200 WRKY family transcription factor     | AM+K_not_in_group |
| Medtr6g080440 glutathione S-transferase            | AM+K_not_in_group |
| Medtr7g014510 oflavone-7-O-methyltransferase       | AM+K_not_in_group |
| Medtr7g065265 , amino-terminal domain protein      | AM+K_not_in_group |
| Medtr7g115220 ise / Hevein / PR-4 / Wheatwin2      | AM+K_not_in_group |
| Medtr7g118300 caffeic acid O-methyltransferase     | AM+K_not_in_group |
| Medtr8g038570 . type disease resistance protein    | AM+K_not_in_group |
| Medtr8g092140 WRKY family transcription factor     | AM+K_not_in_group |
| Medtr1g066930 riboflavin synthase alpha chain      | AM+K_not_in_group |
| Medtr1g092870 . abundant transcript-like protein   | AM+K_not_in_group |
| Medtr2g030460 ess up-regulated Nod 19 protein      | AM+K_not_in_group |
| Medtr3g080090 sion facilitator family transporter  | AM+K_not_in_group |
| Medtr3g088460 NRAMP metal ion transporter 6        | AM+K_not_in_group |
| Medtr4g094700 methyl-8-ribityllumazine synthase    | AM+K_not_in_group |
| Medtr5g018990 ochrome P450 family 71 protein       | AM+K_not_in_group |
| Medtr5g074710 peroxidase family protein            | AM+K_not_in_group |
| Medtr5g075680 on facilitator transporter MTP8.1    | AM+K_not_in_group |
| Medtr8g028780 ductase/ferric-chelate reductase     | AM+K_not_in_group |
| Medtr1g070250 onal regulator superman protein      | AM+K_in_group     |
| Medtr6g069000 cytochrome P450 family protein       | AM+K_not_in_group |
| Medtr6g087980 Rho-like GTP-binding protein         | AM+K_not_in_group |
| Medtr8g074070 xygenase family oxidoreductase       | AM+K_not_in_group |
| Medtr3g462220 t embryo arrest protein, putative    | AM+K_not_in_group |
| Medtr6g069510 n efflux carrier family transporter  | AM+K_not_in_group |
| Medtr2g012670 ubbelig receptor family 3 protein    | AM+K_not_in_group |
| Medtr1g104840 hypothetical protein                 | AM+K_not_in_group |
| Medtr4g077590 hypothetical protein                 | AM+K_not_in_group |
| Medtr4g116470 hypothetical protein                 | AM+K_not_in_group |
| Medtr5g026790 kinesin-like protein                 | AM+K_not_in_group |
| Medtr5g076140 hypothetical protein                 | AM+K_not_in_group |
| Medtr1g014210 peroxide glutathione peroxidase      | AM+K_not_in_group |
| Medtr1g061850 ;ptidyl-prolyl cis-trans isomerase   | AM+K_not_in_group |
| Medtr1g082210 ellin receptor GID1c-like protein    | AM+K_not_in_group |
| Medtr1g112510 ase/hydroxypyruvate reductase        | AM+K_not_in_group |
| Medtr1g115740 l chlorophyll A/B-binding protein    | AM+K_not_in_group |
| Medtr3g053890 ite aminotransferase-like protein    | AM+K_not_in_group |
| Medtr4g074210 DUF3067 family protein               | AM+K_not_in_group |
| Medtr4g108800 ibulose-phosphate 3-epimerase        | AM+K_not_in_group |
| Medtr6g008220 edoxin reductase catalytic chain     | AM+K_not_in_group |
| Medtr7g061840 .lomere-binding protein, putative    | AM+K_not_in_group |
| Medtr8g094580 NAC-like transcription factor        | AM+K_not_in_group |
| Medtr1g015970 fructan exohydrolase                 | AM+K_not_in_group |
| Medtr4g131060 CBL-interacting kinase               | AM+K_not_in_group |
| Medtr7g113110 letoxification superfamily protein   | AM+K_not_in_group |
| Medtr3g056310 main disease resistance protein      | AM+K_not_in_group |
| Medtr2g038380 ar ras-group-related LRR protein     | AM+K_not_in_group |
| Medtr5g059200 -related thaumatin family protein    | AM+K_not_in_group |
| Medtr5g094390 nine-kinase WNK11-like protein       | AM+K_not_in_group |
| Medtr1g041265_s etical protein (other strand read) | AM+K_not_in_group |
| Medtr1g071710 :rose-binding protein-like protein   | AM+K_not_in_group |
| Medtr1g078420 ransmembrane protein, putative       | AM+K_not_in_group |

## diffusion\_prioritization\_ALL

|                |                                    |                   |
|----------------|------------------------------------|-------------------|
| Medtr2g014040  | undant domain protein, putative    | AM+K_not_in_group |
| Medtr2g062800  | seed maturation protein PM41       | AM+K_not_in_group |
| Medtr3g110550  | ring factor-like protein, putative | AM+K_not_in_group |
| Medtr3g117190  | dehydrin                           | AM+K_not_in_group |
| Medtr4g094720  | 1-cys peroxiredoxin PER1           | AM+K_not_in_group |
| Medtr4g126070  |                                    | AM+K_not_in_group |
| Medtr5g038570  | ase regulatory subunit gamma 1     | AM+K_not_in_group |
| Medtr5g067740  | hypothetical protein               | AM+K_not_in_group |
| Medtr7g069980  | ferritin                           | AM+K_not_in_group |
| Medtr8g028480  | embryogenesis abundant protein     | AM+K_not_in_group |
| Medtr3g031650  | moyl-CoA reductase-like protein    | AM+K_not_in_group |
| Medtr6g078920  | hypothetical protein               | AM+K_not_in_group |
| Medtr4g093620  | fructose-1,6-bisphosphatase        | AM+K_not_in_group |
| Medtr4g126020  | almodulin-binding family protein   | AM+K_not_in_group |
| Medtr1g021915  | 'SUR4 membrane family protein      | AM+K_not_in_group |
| Medtr4g123990  | ABC transporter B family protein   | AM+K_not_in_group |
| Medtr0251s0050 | myb-related transcription factor   | AM+K_not_in_group |
| Medtr7g103390  | ike DNA-binding domain protein     | AM+K_not_in_group |
| Medtr1g108660  | dent carboxyl methyltransferase    | AM+K_not_in_group |
| Medtr3g089940  | ol dehydrogenase family protein    | AM+K_not_in_group |
| Medtr1g107135  | alpha-L-fucosidase-like protein    | AM+K_not_in_group |
| Medtr4g014960  | ective in exine formation protein  | AM+K_not_in_group |
| Medtr8g027995  | formin-like 2 domain protein       | AM+K_not_in_group |
| Medtr8g098230  | te hydrolase superfamily protein   | AM+K_not_in_group |
| Medtr8g075260  | TPR superfamily protein            | AM+K_not_in_group |
| Medtr8g075950  | ranone isomerase family protein    | AM+K_not_in_group |
| Medtr8g046290  | receptor-like kinase               | AM+K_not_in_group |
| Medtr4g082060  | nger DNA-binding family protein    | AM+K_not_in_group |
| Medtr1g052680  | hypothetical protein               | AM+K_not_in_group |
| Medtr3g022140  | ase resistance protein, putative   | AM+K_not_in_group |
| Medtr4g005860  | oxidoreductase family protein      | AM+K_not_in_group |
| Medtr4g075190  | oredoxin-like U5 snRNP protein     | AM+K_not_in_group |
| Medtr6g036490  | hypothetical protein               | AM+K_not_in_group |
| Medtr8g018520  | seed linoleate 9S-lipoxygenase     | AM+K_not_in_group |
| Medtr1g040430  | ethylene response factor           | AM+K_not_in_group |
| Medtr1g098240  | /sugar transporter family protein  | AM+K_not_in_group |
| Medtr6g068960  | centromere C-like protein          | AM+K_not_in_group |
| Medtr1g025980  | peroxidase family protein          | AM+K_not_in_group |
| Medtr7g021300  | ce response/dirigent-like protein  | AM+K_not_in_group |
| Medtr1g052880  | ocus lectin kinase family protein  | AM+K_not_in_group |
| Medtr5g019050  | rsM-domain receptor-like kinase    | AM+K_not_in_group |
| Medtr6g087140  | ninja-family protein mc410         | AM+K_not_in_group |
| Medtr7g110660  | l-tRNA synthetase family protein   | AM+K_not_in_group |
| Medtr1g061730  | nesis abundant protein, putative   | AM+K_not_in_group |
| Medtr2g067660  | e-semialdehyde dehydrogenase       | AM+K_not_in_group |
| Medtr3g069050  | ated receptor kinase-like protein  | AM+K_not_in_group |
| Medtr6g066240  | insporter family protein, putative | AM+K_not_in_group |
| Medtr2g101090  | sporter-like ABC domain protein    | AM+K_not_in_group |
| Medtr1g032160  | caleosin                           | AM+K_not_in_group |
| Medtr2g027660  | RAB GTPase-like protein C2B        | AM+K_not_in_group |
| Medtr2g084315  | C2H2-type zinc finger protein      | AM+K_not_in_group |

## diffusion\_prioritization\_ALL

|                |                                     |                   |
|----------------|-------------------------------------|-------------------|
| Medtr4g073920  | phosphodiesterase-like protein      | AM+K_in_group     |
| Medtr4g079780  | ketol-acid reductoisomerase         | AM+K_not_in_group |
| Medtr4g093820  | hypothetical protein                | AM+K_not_in_group |
| Medtr4g101920  | family protein (other strand read)  | AM+K_not_in_group |
| Medtr5g038460  | plant/T7N9-9 protein                | AM+K_not_in_group |
| Medtr7g097090  | transcription factor-like protein   | AM+K_not_in_group |
| Medtr8g028265  | BAG domain protein                  | AM+K_not_in_group |
| Medtr5g086310  | M receptor kinase K1B, putative     | AM+K_not_in_group |
| Medtr1g081850  | hypothetical protein                | AM+K_not_in_group |
| Medtr1g100250  | ATP-binding protein                 | AM+K_not_in_group |
| Medtr4g007230  | hypothetical protein                | AM+K_not_in_group |
| Medtr5g033880  | F-box/kelch-repeat plant protein    | AM+K_not_in_group |
| Medtr4g055440  | one deacetylase HDT2, putative      | AM+K_not_in_group |
| Medtr4g112900  | Threonine kinase family protein     | AM+K_not_in_group |
| Medtr4g106650  | hypothetical protein                | AM+K_not_in_group |
| Medtr8g014730  | LRR receptor-like kinase plant      | AM+K_not_in_group |
| Medtr4g064150  | GRAS family transcription factor    | AM+K_not_in_group |
| Medtr5g026370  | tyrosine kinase family protein      | AM+K_not_in_group |
| Medtr4g079610  | gene family member MtCLE13          | AM+K_not_in_group |
| Medtr1g011630  | ole-3-pyruvate monooxygenase        | AM+K_not_in_group |
| Medtr1g102350  | subtilisin-like serine protease     | AM+K_not_in_group |
| Medtr3g026620  | oside hydrolase family 1 protein    | AM+K_not_in_group |
| Medtr3g116070  | IP-shaped cotyledon-like protein    | AM+K_not_in_group |
| Medtr4g092780  | sphate 1-epimerase-like protein     | AM+K_not_in_group |
| Medtr4g094625  | imine monophosphate synthase        | AM+K_not_in_group |
| Medtr4g125490  | with-regulating factor-like protein | AM+K_not_in_group |
| Medtr5g009150  | dynammin-like protein 1E            | AM+K_not_in_group |
| Medtr6g081040  | racting (KIP1-like) family protein  | AM+K_not_in_group |
| Medtr8g089575  | enoyl-(acyl carrier) reductase      | AM+K_not_in_group |
| Medtr8g469430  | box leucine zipper family protein   | AM+K_not_in_group |
| Medtr5g075020  | LOB domain protein                  | AM+K_not_in_group |
| Medtr3g092780  | PRR response regulator              | AM+K_not_in_group |
| Medtr1g014110  | ransmembrane protein, putative      | AM+K_not_in_group |
| Medtr1g073640  | caleosin CLO1-1                     | AM+K_not_in_group |
| Medtr3g109190  | oleosin                             | AM+K_not_in_group |
| Medtr7g113650  | )-binding rossmann-fold protein     | AM+K_not_in_group |
| Medtr8g066700  | ceptor-like kinase family protein   | AM+K_not_in_group |
| Medtr8g107030  | -alpha-steroid 4-dehydrogenase      | AM+K_not_in_group |
| Medtr2g015370  | calmodulin-binding protein          | AM+K_not_in_group |
| Medtr3g046760  | aryotic cytochrome b561 protein     | AM+K_not_in_group |
| Medtr3g113970  | tubulin beta-1 chain                | AM+K_not_in_group |
| Medtr4g007220  | L-fucosyltransferase-like protein   | AM+K_not_in_group |
| Medtr5g089370  | synaptobrevin-like protein          | AM+K_not_in_group |
| Medtr5g098420  | clin-like arabinogalactan protein   | AM+K_not_in_group |
| Medtr8g447080  | e (caspase) p20 domain protein      | AM+K_not_in_group |
| Medtr4g104620  | kinase AFC1                         | AM+K_not_in_group |
| Medtr2g041960  | Threonine kinase family protein     | AM+K_not_in_group |
| Medtr5g094450  | GRAS family transcription factor    | AM+K_not_in_group |
| Medtr0078s0060 | ucosyltransferase family protein    | AM+K_not_in_group |
| Medtr1g090100  | glutathione S-transferase           | AM+K_not_in_group |
| Medtr1g099280  | ic transporter-like family-protein  | AM+K_not_in_group |

diffusion\_prioritization\_ALL

|               |                                     |                   |
|---------------|-------------------------------------|-------------------|
| Medtr3g062600 | 60S ribosomal protein L10-2         | AM+K_not_in_group |
| Medtr3g069190 | ropane dioxygenase-like protein     | AM+K_not_in_group |
| Medtr4g021350 | eductase family oxidoreductase      | AM+K_not_in_group |
| Medtr4g117380 | 4-beta-D-glucanase-like protein     | AM+K_not_in_group |
| Medtr4g485640 | UDP-glucosyltransferase 73B2        | AM+K_not_in_group |
| Medtr5g006670 | odienoate reductase-like protein    | AM+K_not_in_group |
| Medtr5g024640 | luxin efflux carrier family protein | AM+K_not_in_group |
| Medtr5g031250 | cohol dehydrogenase-like protein    | AM+K_not_in_group |
| Medtr5g031310 | cohol dehydrogenase-like protein    | AM+K_not_in_group |
| Medtr5g090630 | avonoid 3-O-glucosyltransferase     | AM+K_not_in_group |
| Medtr5g090700 | avonoid 3-O-glucosyltransferase     | AM+K_not_in_group |
| Medtr7g065640 | , amino-terminal domain protein     | AM+K_not_in_group |
| Medtr7g065740 | glutathione S-transferase           | AM+K_not_in_group |
| Medtr7g114980 | eductase family oxidoreductase      | AM+K_not_in_group |
| Medtr8g098350 | 'rotKB/Swiss-Prot;Acc:Q9ZNX6]       | AM+K_not_in_group |
| Medtr1g014670 | stidine kinase cytokinin receptor   | AM+K_not_in_group |
| Medtr7g009730 | NRKY family transcription factor    | AM+K_not_in_group |
| Medtr5g018570 | all associated kinase-like protein  | AM+K_not_in_group |
| Medtr1g009750 | class III peroxidase                | AM+K_not_in_group |
| Medtr3g067280 | albumin I                           | AM+K_not_in_group |
| Medtr6g086390 | inogalactan peptide-like protein    | AM+K_not_in_group |
| Medtr3g098810 | transcription factor-like protein   | AM+K_not_in_group |
| Medtr1g050530 | ose-binding-like domain protein     | AM+K_not_in_group |
| Medtr6g039180 | receptor-like protein               | AM+K_not_in_group |
| Medtr8g069390 | phosphate transporter 2-1           | AM+K_not_in_group |
| Medtr1g021070 | DUF1645 family protein              | AM+K_not_in_group |
| Medtr1g029600 | ceptor-like kinase plant, putative  | AM+K_not_in_group |
| Medtr5g025500 | SWIB/MDM2 domain protein            | AM+K_not_in_group |
| Medtr7g079730 | vicilin 47 kDa protein              | AM+K_not_in_group |
| Medtr6g016880 | -like acyl-esterase family protein  | AM+K_not_in_group |
| Medtr1g081280 | DUF2358 family protein              | AM+K_not_in_group |
| Medtr8g009900 | glutamyl-tRNA synthetase            | AM+K_not_in_group |
| Medtr4g065660 | Ctr family copper transporter       | AM+K_not_in_group |
| Medtr4g118610 | rter (SP) family MFS transporter    | AM+K_not_in_group |
| Medtr7g024460 | nase (acetyl-transferring) kinase   | AM+K_not_in_group |
| Medtr4g095430 | -responsive NPH3 family protein     | AM+K_not_in_group |
| Medtr1g038680 | cationic peroxidase                 | AM+K_not_in_group |
| Medtr1g089890 | hypothetical protein                | AM+K_not_in_group |
| Medtr2g034410 | hypothetical protein                | AM+K_not_in_group |
| Medtr2g096740 | Dof domain zinc finger protein      | AM+K_not_in_group |
| Medtr3g086100 | nse regulator ARR2-like protein     | AM+K_not_in_group |
| Medtr3g112180 | palmitate O-feruloyl transferase    | AM+K_not_in_group |
| Medtr4g073240 | ubiquitin-conjugating enzyme E2     | AM+K_not_in_group |
| Medtr8g009720 | hypothetical protein                | AM+K_not_in_group |
| Medtr8g106840 | ther of FT and TFL1-like protein    | AM+K_not_in_group |
| Medtr5g032660 | ydrofolate reductase-like protein   | AM+K_not_in_group |
| Medtr7g076150 | thyltransferase PMT16, putative     | AM+K_not_in_group |
| Medtr7g095680 | eat shock transcription factor A3   | AM+K_not_in_group |
| Medtr7g009930 | dose 1-epimerase family protein     | AM+K_not_in_group |
| Medtr7g056390 | rotein interaction domain protein   | AM+K_not_in_group |
| Medtr3g092060 | te hydrolase superfamily protein    | AM+K_not_in_group |



## diffusion\_prioritization\_ALL

|                                                    |                   |
|----------------------------------------------------|-------------------|
| Medtr4g068220 ransmembrane protein, putative       | AM+K_not_in_group |
| Medtr1g062860 aryotic-type carbonic anhydrase      | AM+K_not_in_group |
| Medtr4g094275 chaperone DnaJ domain protein        | AM+K_not_in_group |
| Medtr2g009760 ³PR containing plant-like protein    | AM+K_not_in_group |
| Medtr5g073210 /diphenol oxidase family protein     | AM+K_not_in_group |
| Medtr8g023610 rotundifolia-like protein            | AM+K_not_in_group |
| Medtr4g086340 : (TAIR:plant.1) protein, putative   | AM+K_not_in_group |
| Medtr6g090080 LRR/extensin                         | AM+K_not_in_group |
| Medtr5g045520 ureide permease-like protein         | AM+K_not_in_group |
| Medtr4g064520 rotundifolia-like protein            | AM+K_not_in_group |
| Medtr4g127120 ar ras-group-related LRR protein     | AM+K_not_in_group |
| Medtr3g020820 t calmodulin-binding-like protein    | AM+K_not_in_group |
| Medtr7g099940 l/RBD/RNP motif) family protein      | AM+K_not_in_group |
| Medtr1g015165 class II small heat-shock protein    | AM+K_not_in_group |
| Medtr2g013230 flavonol-4-reductase-like protein    | AM+K_not_in_group |
| Medtr2g079430 Defensin MtDef2.1                    | AM+K_not_in_group |
| Medtr2g096640 ³T domain protein which protein      | AM+K_not_in_group |
| Medtr3g034660 genesis abundant D-like protein      | AM+K_not_in_group |
| Medtr3g075190 inc finger CCCH domain protein       | AM+K_not_in_group |
| Medtr3g078170 le dehydrogenase family protein      | AM+K_not_in_group |
| Medtr4g025130 nitroreductase family protein        | AM+K_not_in_group |
| Medtr4g051575 malate transporter family protein    | AM+K_not_in_group |
| Medtr4g071020 ³/pectin methylesterase inhibitor    | AM+K_not_in_group |
| Medtr4g099370 expansin-B1-like protein             | AM+K_not_in_group |
| Medtr4g134280 osyl hydrolase family 17 protein     | AM+K_not_in_group |
| Medtr4g134790 ATP-dependent RNA helicase           | AM+K_not_in_group |
| Medtr5g013780 vacuolar protein sorting protein     | AM+K_not_in_group |
| Medtr5g020870 lant/F18B3-190 protein, putative     | AM+K_not_in_group |
| Medtr6g071475 ha/beta hydrolase family protein     | AM+K_not_in_group |
| Medtr7g013820 ABI five-binding protein             | AM+K_not_in_group |
| Medtr7g059033 hypothetical protein                 | AM+K_not_in_group |
| Medtr7g090160 yrroline-5-carboxylate reductase     | AM+K_not_in_group |
| Medtr7g112760 \-splicing factor SF2-like protein   | AM+K_not_in_group |
| Medtr8g093790 ³ transcription factor-like protein  | AM+K_not_in_group |
| Medtr1g116180 transcription factor                 | AM+K_not_in_group |
| Medtr2g009275 ransmembrane protein, putative       | AM+K_not_in_group |
| Medtr1527s0010_s amily protein (other strand read) | AM+K_not_in_group |
| Medtr1g105855 onse/antifungal domain protein       | AM+K_not_in_group |
| Medtr3g074390 rter (SP) family MFS transporter     | AM+K_not_in_group |
| Medtr3g077940 arbonic anhydrase family protein     | AM+K_not_in_group |
| Medtr4g107810 ibrane-associated family protein     | AM+K_not_in_group |
| Medtr5g009140 triacylglycerol lipase               | AM+K_not_in_group |
| Medtr5g092310 ¹ (TIR-NBS-LRR class), putative      | AM+K_not_in_group |
| Medtr5g092340 NB-ARC domain protein                | AM+K_not_in_group |
| Medtr5g092410 ce domain protein TSDC protein       | AM+K_not_in_group |
| Medtr6g013130                                      | AM+K_not_in_group |
| Medtr7g078260 LRR resistance protein, putative     | AM+K_not_in_group |
| Medtr7g089090 myosin heavy chain-like protein      | AM+K_not_in_group |
| Medtr8g008505 alpha/beta fold hydrolase            | AM+K_not_in_group |
| Medtr8g018650 seed linoleate 9S-lipoxygenase       | AM+K_not_in_group |
| Medtr8g020950 cytochrome P450 family protein       | AM+K_not_in_group |

diffusion\_prioritization\_ALL

|               |                                    |                   |
|---------------|------------------------------------|-------------------|
| Medtr8g024680 | methyltransferase, putative        | AM+K_not_in_group |
| Medtr1g069960 | ethylene response factor           | AM+K_not_in_group |
| Medtr1g110270 | LK (receptor-like kinase) protein  | AM+K_not_in_group |
| Medtr3g028720 | oside hydrolase family 1 protein   | AM+K_not_in_group |
| Medtr1g087730 | DUF3511 domain protein             | AM+K_not_in_group |
| Medtr2g093960 | C2H2-type zinc finger protein      | AM+K_not_in_group |
| Medtr3g051770 | lin-domain kinase CDPK protein     | AM+K_not_in_group |
| Medtr3g092310 | family GT8 glycosyltransferase     | AM+K_not_in_group |
| Medtr1g086170 | hypothetical protein               | AM+K_not_in_group |
| Medtr4g056520 | ducible serine carboxypeptidase    | AM+K_in_group     |
| Medtr6g011380 | ibrane-associated family protein   | AM+K_not_in_group |
| Medtr6g015880 | COBRA-like protein 2 precursor     | AM+K_not_in_group |
| Medtr1g056530 | AAT-binding transcription factor   | AM+K_not_in_group |
| Medtr3g449620 | polyamine oxidase-like protein     | AM+K_not_in_group |
| Medtr4g125720 | zinc ion-binding protein           | AM+K_not_in_group |
| Medtr5g080680 | ein phosphatase 2C-like protein    | AM+K_not_in_group |
| Medtr8g079250 | heavy metal P-type ATPase          | AM+K_not_in_group |
| Medtr4g117490 | MAP kinase-like protein            | AM+K_not_in_group |
| Medtr1g023260 | salt tolerance-like protein        | AM+K_not_in_group |
| Medtr4g078565 | irgeting protein for Xklp2 protein | AM+K_not_in_group |
| Medtr8g023720 | LRR receptor-like kinase           | AM+K_not_in_group |
| Medtr4g122640 | class III peroxidase               | AM+K_not_in_group |
| Medtr6g090615 | LRR receptor-like kinase plant     | AM+K_not_in_group |
| Medtr7g009320 | receptor-like kinase plant         | AM+K_not_in_group |
| Medtr3g056320 | main disease resistance protein    | AM+K_not_in_group |
| Medtr1g084980 | tyochrome-interacting factor 3.1   | AM+K_not_in_group |
| Medtr2g018780 | hydration stress protein (ERD4)    | AM+K_not_in_group |
| Medtr2g044880 | esterase/pectinesterase inhibitor  | AM+K_not_in_group |
| Medtr5g021580 | salt tolerance-like protein        | AM+K_not_in_group |
| Medtr5g058530 | 3HC4 type (RING finger) protein    | AM+K_not_in_group |
| Medtr5g082570 | FACT complex subunit SSRP1         | AM+K_not_in_group |
| Medtr1g021855 | family GT8 glycosyltransferase     | AM+K_not_in_group |
| Medtr1g030220 | GDSL-like lipase/acylhydrolase     | AM+K_not_in_group |
| Medtr1g112980 | MFS transporter                    | AM+K_not_in_group |
| Medtr2g020850 | ransmembrane protein, putative     | AM+K_not_in_group |
| Medtr4g021330 | legume-specific protein            | AM+K_not_in_group |
| Medtr7g113860 | GDSL-like lipase/acylhydrolase     | AM+K_not_in_group |
| Medtr7g113870 | hypothetical protein               | AM+K_not_in_group |
| Medtr7g498280 | inactive rhomboid-like protein     | AM+K_not_in_group |
| Medtr1g101970 | MADS-box transcription factor      | AM+K_not_in_group |
| Medtr4g124750 | auxin-responsive family protein    | AM+K_not_in_group |
| Medtr7g091890 | lin-domain kinase CDPK protein     | AM+K_not_in_group |
| Medtr1g442860 | G1-like protein                    | AM+K_not_in_group |
| Medtr1g050550 | MFS transporter                    | AM+K_not_in_group |
| Medtr4g107280 | ribosomal protein S6 kinase        | AM+K_not_in_group |
| Medtr2g017620 | protein (MIP) family transporter   | AM+K_not_in_group |
| Medtr2g026420 | hypothetical protein               | AM+K_not_in_group |
| Medtr1g045610 | myb transcription factor           | AM+K_not_in_group |
| Medtr1g096580 | x ABC transporter family protein   | AM+K_not_in_group |
| Medtr1g115190 | nalate transporter family protein  | AM+K_not_in_group |
| Medtr2g450550 | ransmembrane protein, putative     | AM+K_not_in_group |

diffusion\_prioritization\_ALL

|               |                                                     |                   |
|---------------|-----------------------------------------------------|-------------------|
| Medtr3g054010 | ligand-gated ion channel protein                    | AM+K_not_in_group |
| Medtr3g061900 | transmembrane protein, putative                     | AM+K_not_in_group |
| Medtr4g011250 | abundant protein group 3 protein                    | AM+K_not_in_group |
| Medtr4g011270 | abundant protein group 3, putative                  | AM+K_not_in_group |
| Medtr4g046677 | acetylglucosyl group transferase                    | AM+K_not_in_group |
| Medtr5g010730 | protein tyrosine kinase family protein              | AM+K_not_in_group |
| Medtr5g038380 | peptide/nitrate transporter plant                   | AM+K_not_in_group |
| Medtr6g015320 | O-glucoside malonyltransferase                      | AM+K_not_in_group |
| Medtr7g100070 | ATP 5-trisphosphate 5-phosphatase                   | AM+K_not_in_group |
| Medtr8g028160 | GDSL-like lipase/acylhydrolase                      | AM+K_not_in_group |
| Medtr8g080180 | carboxy-terminal region remorin                     | AM+K_not_in_group |
| Medtr1g086180 | MYB family transcription factor                     | AM+K_not_in_group |
| Medtr7g105130 | senescence regulator                                | AM+K_not_in_group |
| Medtr8g085630 | neutral amino acid transporter                      | AM+K_not_in_group |
| Medtr1g029810 | aspartyl protease family protein                    | AM+K_not_in_group |
| Medtr5g021520 | UPF0183 plant-like protein                          | AM+K_not_in_group |
| Medtr8g095090 | MACPF domain protein                                | AM+K_not_in_group |
| Medtr1g008160 | phosphatase (WSD1-like) family protein              | AM+K_not_in_group |
| Medtr1g115850 | oxalate isomerase family protein                    | AM+K_not_in_group |
| Medtr2g088770 | peroxidase family protein                           | AM+K_not_in_group |
| Medtr2g088990 | plastocyanin-like domain protein                    | AM+K_not_in_group |
| Medtr2g090765 | plant-like arabinogalactan protein                  | AM+K_not_in_group |
| Medtr2g103440 | DUF761 domain protein                               | AM+K_not_in_group |
| Medtr3g088420 | acetyl/benzoyltransferase, putative                 | AM+K_not_in_group |
| Medtr3g112000 | transmembrane protein, putative                     | AM+K_not_in_group |
| Medtr3g117050 | transmembrane protein, putative (other strand read) | AM+K_not_in_group |
| Medtr4g015460 | oxalate hydrolase family 1 protein                  | AM+K_not_in_group |
| Medtr4g101380 | peptide/nitrate transporter                         | AM+K_not_in_group |
| Medtr4g127100 | ion efflux carrier family transporter               | AM+K_not_in_group |
| Medtr5g010750 | cytochrome P450 family protein                      | AM+K_not_in_group |
| Medtr5g071200 | binding lectin superfamily protein                  | AM+K_not_in_group |
| Medtr6g039830 | transmembrane protein, putative                     | AM+K_not_in_group |
| Medtr7g092600 | cytochrome P450 family protein                      | AM+K_in_group     |
| Medtr8g016030 | GTP cyclohydrolase I 1                              | AM+K_not_in_group |
| Medtr8g024240 | heavy metal transporter MTP1                        | AM+K_not_in_group |
| Medtr8g066220 | oxalate hydrolase superfamily protein               | AM+K_not_in_group |
| Medtr8g080880 | protein C869.01-like protein, putative              | AM+K_not_in_group |
| Medtr8g090315 | PLAT-plant-stress protein                           | AM+K_not_in_group |
| Medtr8g099365 | hypothetical protein                                | AM+K_not_in_group |
| Medtr3g115170 | transcription activator-like protein                | AM+K_not_in_group |
| Medtr4g052400 | plant/F24K9-26 protein                              | AM+K_not_in_group |
| Medtr4g115360 | Lipid transfer protein                              | AM+K_not_in_group |
| Medtr5g036950 | putative TORTIFOLIA-like protein                    | AM+K_not_in_group |
| Medtr6g015370 | longifolia protein                                  | AM+K_not_in_group |
| Medtr7g010580 | berberellin-regulated family protein                | AM+K_not_in_group |
| Medtr8g078770 | glycine-rich secretory protein, antigen 5           | AM+K_not_in_group |
| Medtr4g125620 | hypothetical protein                                | AM+K_not_in_group |
| Medtr4g111965 | fragile-X-F-associated protein                      | AM+K_not_in_group |
| Medtr5g096700 | BTB/POZ domain plant protein                        | AM+K_not_in_group |
| Medtr2g019640 | cytochrome P450 family monooxygenase                | AM+K_not_in_group |
| Medtr2g100070 | cytochrome oxidoreductase family protein            | AM+K_not_in_group |

diffusion\_prioritization\_ALL

|                |                                   |                   |
|----------------|-----------------------------------|-------------------|
| Medtr4g019880  | GDSL-like lipase/acylhydrolase    | AM+K_not_in_group |
| Medtr8g093560  | cysteine desulfurylase            | AM+K_not_in_group |
| Medtr0047s0040 | calmodulin-binding motif protein  | AM+K_not_in_group |
| Medtr0184s0010 | UDP-glucosyltransferase           | AM+K_not_in_group |
| Medtr1g090060  | , amino-terminal domain protein   | AM+K_not_in_group |
| Medtr7g094520  | chain dehydrogenase/reductase     | AM+K_not_in_group |
| Medtr0002s1200 | ribonuclease T2 family protein    | AM+K_not_in_group |
| Medtr4g037560  | ransmembrane protein, putative    | AM+K_not_in_group |
| Medtr6g023610  | ort-chain alcohol dehydrogenase   | AM+K_not_in_group |
| Medtr4g076940  | x ABC transporter family protein  | AM+K_not_in_group |
| Medtr4g088510  | hypothetical protein              | AM+K_not_in_group |
| Medtr1g080510  | hypothetical protein              | AM+K_not_in_group |
| Medtr4g028830  | WNK kinase                        | AM+K_not_in_group |
| Medtr6g007603  | reonine-kinase HT1-like protein   | AM+K_not_in_group |
| Medtr6g012980  | /Threonine kinase family protein  | AM+K_not_in_group |
| Medtr2g099530  | ha hydrolase-like domain kinase   | AM+K_not_in_group |
| Medtr8g107000  | kinase kinase kinase-like protein | AM+K_not_in_group |
| Medtr8g078300  | Nod-factor receptor 5, putative   | AM+K_in_group     |
| Medtr3g067780  | /Threonine kinase family protein  | AM+K_not_in_group |
| Medtr3g106220  | ise regulator ARR12-like protein  | AM+K_not_in_group |
| Medtr4g086010  | 1 3-alpha-L-fucosyltransferase A  | AM+K_not_in_group |
| Medtr7g077780  | U-box kinase family protein       | AM+K_not_in_group |
| Medtr3g110190  | RING-H2 finger protein ATL4J      | AM+K_not_in_group |
| Medtr4g023040  | 1 (TIR-NBS-LRR class), putative   | AM+K_not_in_group |
| Medtr5g039000  | eucine zipper ATHB-like protein   | AM+K_not_in_group |
| Medtr7g094870  | hypothetical protein              | AM+K_not_in_group |
| Medtr1g050322  | thioredoxin                       | AM+K_not_in_group |
| Medtr1g025780  | GDSL-like lipase/acylhydrolase    | AM+K_not_in_group |
| Medtr7g099670  | ransmembrane protein, putative    | AM+K_not_in_group |
| Medtr0026s0010 | phloem protein                    | AM+K_not_in_group |
| Medtr5g010440  | LRR receptor-like kinase          | AM+K_not_in_group |
| Medtr1g107235  | methylthioribose kinase           | AM+K_not_in_group |
| Medtr8g105910  | RNA recognition motif             | AM+K_not_in_group |
| Medtr0334s0010 | plastocyanin-like domain protein  | AM+K_not_in_group |
| Medtr1g052475  | RAB GTPase-like protein A1D       | AM+K_not_in_group |
| Medtr1g056550  | syntaxin of plants 122 protein    | AM+K_not_in_group |
| Medtr1g062880  | aryotic-type carbonic anhydrase   | AM+K_not_in_group |
| Medtr3g090350  | MKS1-like protein                 | AM+K_not_in_group |
| Medtr3g103190  | ransmembrane protein, putative    | AM+K_not_in_group |
| Medtr4g082355  | ransmembrane protein, putative    | AM+K_not_in_group |
| Medtr4g094562  | ess up-regulated Nod 19 protein   | AM+K_not_in_group |
| Medtr4g094775  | otKB/Swiss-Prot;Acc:Q6WNR0]       | AM+K_not_in_group |
| Medtr5g018120  | )-NBS-LRR class) family protein   | AM+K_not_in_group |
| Medtr6g046930  | main disease resistance protein   | AM+K_not_in_group |
| Medtr7g016780  | stilbene synthase family protein  | AM+K_not_in_group |
| Medtr7g016820  | stilbene synthase family protein  | AM+K_not_in_group |
| Medtr8g071130  | ricresinol reductase-like protein | AM+K_not_in_group |
| Medtr5g022880  | aspartyl protease family protein  | AM+K_not_in_group |
| Medtr3g070140  | coronatine-insensitive protein    | AM+K_not_in_group |
| Medtr3g082660  | chain fatty acid CoA synthetase   | AM+K_not_in_group |
| Medtr8g089740  | alpha-galactosidase               | AM+K_not_in_group |

## diffusion\_prioritization\_ALL

|                |                                                                  |                   |
|----------------|------------------------------------------------------------------|-------------------|
| Medtr5g054900  | BZIP family transcription factor                                 | AM+K_not_in_group |
| Medtr8g098910  | α-ketoglutarate reductase                                        | AM+K_not_in_group |
| Medtr8g099185  | α-ketoglutarate dehydrogenase                                    | AM+K_not_in_group |
| Medtr8g014910  | GDSL-like lipase/acylhydrolase                                   | AM+K_not_in_group |
| Medtr5g055020  | leucyl aminopeptidase superfamily protein                        | AM+K_not_in_group |
| Medtr1g010220  | leucyl aminopeptidase-like protein                               | AM+K_not_in_group |
| Medtr5g037710  | leucyl aminopeptidase-like protein                               | AM+K_not_in_group |
| Medtr7g065080  | leucyl aminopeptidase-like protein                               | AM+K_not_in_group |
| Medtr1g052425  | LRR receptor-like kinase                                         | AM+K_not_in_group |
| Medtr3g087150  | leucyl aminopeptidase-like protein, putative                     | AM+K_not_in_group |
| Medtr4g126270  | leucyl aminopeptidase-like protein, putative (other strand read) | AM+K_not_in_group |
| Medtr7g099850  | leucyl aminopeptidase-like protein                               | AM+K_not_in_group |
| Medtr8g039340  | leucyl aminopeptidase-like protein                               | AM+K_not_in_group |
| Medtr1g017390  | leucyl aminopeptidase-like protein                               | AM+K_not_in_group |
| Medtr8g018430  | leucyl aminopeptidase-like protein                               | AM+K_not_in_group |
| Medtr1g112050  | leucyl aminopeptidase-like protein                               | AM+K_not_in_group |
| Medtr1g014320  | leucyl aminopeptidase-like protein                               | AM+K_not_in_group |
| Medtr4g109020  | leucyl aminopeptidase-like protein, putative                     | AM+K_in_group     |
| Medtr8g030590  | leucyl aminopeptidase-like protein                               | AM+K_not_in_group |
| Medtr5g075650  | LRR receptor-like kinase                                         | AM+K_not_in_group |
| Medtr5g044270  | leucyl aminopeptidase-like protein                               | AM+K_not_in_group |
| Medtr7g034345  | leucyl aminopeptidase-like protein                               | AM+K_not_in_group |
| Medtr7g104720  | leucyl aminopeptidase-like protein                               | AM+K_not_in_group |
| Medtr8g099305  | leucyl aminopeptidase-like protein                               | AM+K_not_in_group |
| Medtr7g114750  | leucyl aminopeptidase-like protein                               | AM+K_not_in_group |
| Medtr1g077930  | leucyl aminopeptidase-like protein                               | AM+K_in_group     |
| Medtr7g018880  | leucyl aminopeptidase-like protein                               | AM+K_not_in_group |
| Medtr4g070950  | LRR receptor-like kinase                                         | AM+K_not_in_group |
| Medtr5g038600  | leucyl aminopeptidase-like protein                               | AM+K_not_in_group |
| Medtr5g010520  | leucyl aminopeptidase-like protein                               | AM+K_not_in_group |
| Medtr3g083570  | leucyl aminopeptidase-like protein                               | AM+K_not_in_group |
| Medtr1g097840  | leucyl aminopeptidase-like protein                               | AM+K_not_in_group |
| Medtr2g045080  | leucyl aminopeptidase-like protein                               | AM+K_not_in_group |
| Medtr2g083910  | DUF1685 family protein                                           | AM+K_not_in_group |
| Medtr2g086730  | leucyl aminopeptidase-like protein                               | AM+K_not_in_group |
| Medtr3g096310  | leucyl aminopeptidase-like protein                               | AM+K_not_in_group |
| Medtr3g100100  | TPR domain protein                                               | AM+K_not_in_group |
| Medtr3g462280  | leucyl aminopeptidase-like protein                               | AM+K_not_in_group |
| Medtr4g025730  | leucyl aminopeptidase-like protein                               | AM+K_not_in_group |
| Medtr5g062310  | leucyl aminopeptidase-like protein                               | AM+K_not_in_group |
| Medtr8g032010  | leucyl aminopeptidase-like protein                               | AM+K_not_in_group |
| Medtr8g077590  | leucyl aminopeptidase-like protein                               | AM+K_not_in_group |
| Medtr1g100733  | leucyl aminopeptidase-like protein                               | AM+K_not_in_group |
| Medtr7g091880  | leucyl aminopeptidase-like protein                               | AM+K_not_in_group |
| Medtr1g116320  | leucyl aminopeptidase-like protein                               | AM+K_not_in_group |
| Medtr3g435320  | leucyl aminopeptidase-like protein                               | AM+K_not_in_group |
| Medtr0136s0060 | leucyl aminopeptidase-like protein                               | AM+K_not_in_group |
| Medtr1g088230  | leucyl aminopeptidase-like protein                               | AM+K_not_in_group |
| Medtr5g009870  | leucyl aminopeptidase-like protein                               | AM+K_not_in_group |
| Medtr6g082180  | leucyl aminopeptidase-like protein                               | AM+K_not_in_group |
| Medtr5g006780  | leucyl aminopeptidase-like protein                               | AM+K_not_in_group |

## diffusion\_prioritization\_ALL

|                |                                          |                   |
|----------------|------------------------------------------|-------------------|
| Medtr8g065050  | rrolidone-carboxylate peptidase          | AM+K_not_in_group |
| Medtr1g012290  | hypothetical protein                     | AM+K_not_in_group |
| Medtr1g069255  | glutaredoxin C4                          | AM+K_not_in_group |
| Medtr1g089810  | reticulum auxin-binding protein          | AM+K_not_in_group |
| Medtr1g090140  | cpn60 chaperonin family protein          | AM+K_not_in_group |
| Medtr1g099840  | heat shock protein 81-2                  | AM+K_not_in_group |
| Medtr2g005690  | 70 kDa heat shock protein                | AM+K_not_in_group |
| Medtr2g010020  | heat shock 70 kDa protein                | AM+K_not_in_group |
| Medtr2g013535  | hypothetical protein                     | AM+K_not_in_group |
| Medtr2g102180  | heat shock 70 kDa protein                | AM+K_not_in_group |
| Medtr3g052760  | caliculated small heat shock protein     | AM+K_not_in_group |
| Medtr4g021570  | beta-catenin-like repeat protein         | AM+K_not_in_group |
| Medtr4g032500  | ubiquitin ligase, SKP1 component         | AM+K_not_in_group |
| Medtr4g061240  | hypothetical protein                     | AM+K_not_in_group |
| Medtr4g091590  | 6 kDa class I heat shock protein         | AM+K_not_in_group |
| Medtr4g093770  | p8MTCP1                                  | AM+K_not_in_group |
| Medtr5g070445  | hypothetical protein                     | AM+K_not_in_group |
| Medtr5g078040  | isomeric small heat shock protein        | AM+K_not_in_group |
| Medtr7g012820  | caseinolytic proteinase B3               | AM+K_not_in_group |
| Medtr7g058510  | peptidase family protein, putative       | AM+K_not_in_group |
| Medtr7g093500  | heat shock ATPase-like protein           | AM+K_not_in_group |
| Medtr8g015130  | hypothetical protein (other strand read) | AM+K_not_in_group |
| Medtr8g022310  | chaperone DnaJ domain protein            | AM+K_not_in_group |
| Medtr8g042660  | beta-LRR class) (other strand read)      | AM+K_not_in_group |
| Medtr4g021690  | type disease resistance protein          | AM+K_not_in_group |
| Medtr8g104510  | calmodulin-binding-like protein          | AM+K_not_in_group |
| Medtr2g049790  | CBL-interacting kinase                   | AM+K_not_in_group |
| Medtr2g035470  | nolymbodopterin cofactor sulfurase       | AM+K_not_in_group |
| Medtr7g072575  | CBL-interacting kinase                   | AM+K_not_in_group |
| Medtr0027s0260 | chitinase                                | AM+K_not_in_group |
| Medtr4g097220  | DUF4228 domain protein                   | AM+K_not_in_group |
| Medtr6g043700  | alginate lyase                           | AM+K_not_in_group |
| Medtr6g079630  | chitinase                                | AM+K_not_in_group |
| Medtr7g076920  | Ripening related protein family          | AM+K_not_in_group |
| Medtr8g055940  | chitinase                                | AM+K_not_in_group |
| Medtr1g019160  | hypothetical protein                     | AM+K_not_in_group |
| Medtr1g090440  | C4-type RING zinc finger protein         | AM+K_not_in_group |
| Medtr2g023910  | trypsin proteinase superfamily protein   | AM+K_not_in_group |
| Medtr3g462710  | trypsin peptide transport family protein | AM+K_in_group     |
| Medtr4g047610  | papain family cysteine protease          | AM+K_not_in_group |
| Medtr4g078840  | transmembrane protein, putative          | AM+K_not_in_group |
| Medtr4g097420  | hypothetical protein (other strand read) | AM+K_not_in_group |
| Medtr5g022560  | papain family cysteine protease          | AM+K_not_in_group |
| Medtr5g022560  | cysteine protease (other strand read)    | AM+K_not_in_group |
| Medtr5g043550  | chitinase                                | AM+K_not_in_group |
| Medtr6g011860  | trypsin factor (other strand read)       | AM+K_not_in_group |
| Medtr7g012340  | Lipid transfer protein                   | AM+K_not_in_group |
| Medtr7g076960  | Ripening related protein family          | AM+K_in_group     |
| Medtr7g081050  | triacylglycerol lipase-like protein      | AM+K_not_in_group |
| Medtr7g104360  | phosphatase superfamily protein          | AM+K_not_in_group |
| Medtr8g011350  | trypsin carboxypeptidase-like protein    | AM+K_not_in_group |

## diffusion\_prioritization\_ALL

|                 |                                    |                   |
|-----------------|------------------------------------|-------------------|
| Medtr8g031150_s | protein family (other strand read) | AM+K_not_in_group |
| Medtr4g083030   | thyltransferase PMT16, putative    | AM+K_not_in_group |
| Medtr1g072310   | hypothetical protein               | AM+K_not_in_group |
| Medtr2g030200   | NAD(P) binding domain protein      | AM+K_not_in_group |
| Medtr7g079350   | LysM type receptor kinase          | AM+K_not_in_group |
| Medtr8g098375   | protein (MIP) family transporter   | AM+K_in_group     |
| Medtr2g011720   | ptor-interacting protein, putative | AM+K_not_in_group |
| Medtr4g112430   | transporting ATPase-like protein   | AM+K_not_in_group |
| Medtr7g110810   | elix DNA-binding domain protein    | AM+K_not_in_group |
| Medtr1g111450   | 40S ribosomal S3-like protein      | AM+K_not_in_group |
| Medtr3g462390   | receptor-like cytoplasmic kinase   | AM+K_not_in_group |
| Medtr6g087910   | ter (SP) family MFS transporter    | AM+K_not_in_group |
| Medtr3g464210   | sulfate transporter-like protein   | AM+K_not_in_group |
| Medtr1g047800   | -NBS-LRR class) family protein     | AM+K_not_in_group |
| Medtr2g012790   | ch-repeat plant protein, putative  | AM+K_not_in_group |
| Medtr0004s0210  | ASP POPTRDRAFT-like protein        | AM+K_not_in_group |
| Medtr1g034360   | long-chain fatty acyl CoA ligase   | AM+K_not_in_group |
| Medtr1g071720   | Lipid transfer protein             | AM+K_not_in_group |
| Medtr1g071730   | Lipid transfer protein             | AM+K_not_in_group |
| Medtr1g096290   | hypothetical protein               | AM+K_not_in_group |
| Medtr1g106085   | scorbate transporter-like protein  | AM+K_not_in_group |
| Medtr2g009450   | osin group485 secreted peptide     | AM+K_not_in_group |
| Medtr2g034760   | hypothetical protein               | AM+K_not_in_group |
| Medtr2g034780   | hypothetical protein               | AM+K_not_in_group |
| Medtr2g046150   | DUF538 family protein              | AM+K_not_in_group |
| Medtr2g060350   | polygalacturonase                  | AM+K_not_in_group |
| Medtr2g062600   | Lipid transfer protein             | AM+K_not_in_group |
| Medtr2g084585   | GDSL-like lipase/acylhydrolase     | AM+K_not_in_group |
| Medtr3g026160   | osin group485 secreted peptide     | AM+K_not_in_group |
| Medtr3g026290   | -rich group669 secreted peptide    | AM+K_not_in_group |
| Medtr3g109340   | transcription factor-like protein  | AM+K_not_in_group |
| Medtr3g463060   | pendent fatty acid hydroxylase     | AM+K_not_in_group |
| Medtr4g073950   | onsive, dirigent domain protein    | AM+K_not_in_group |
| Medtr4g075110   | cytochrome P450 family protein     | AM+K_not_in_group |
| Medtr4g093920   | osin group485 secreted peptide     | AM+K_not_in_group |
| Medtr4g093940   | osin group485 secreted peptide     | AM+K_not_in_group |
| Medtr4g116540   | x ABC transporter family protein   | AM+K_not_in_group |
| Medtr4g415290   | rol-3-phosphate acyltransferase    | AM+K_not_in_group |
| Medtr5g006940   | Lipid transfer protein             | AM+K_not_in_group |
| Medtr5g006950   | Lipid transfer protein             | AM+K_not_in_group |
| Medtr5g020960   | metal-associated domain protein    | AM+K_in_group     |
| Medtr5g064510   | osin group485 secreted peptide     | AM+K_not_in_group |
| Medtr5g064530   | osin group485 secreted peptide     | AM+K_not_in_group |
| Medtr5g080360   | rol-3-phosphate acyltransferase    | AM+K_not_in_group |
| Medtr6g026820   | hypothetical protein               | AM+K_not_in_group |
| Medtr6g084430   | transcription factor-like protein  | AM+K_not_in_group |
| Medtr7g009960   | yltransferase WSD1-like protein    | AM+K_not_in_group |
| Medtr7g027175   | palmitate O-feruloyl transferase   | AM+K_not_in_group |
| Medtr7g067380   | rol-3-phosphate acyltransferase    | AM+K_not_in_group |
| Medtr7g100120   | x ABC transporter family protein   | AM+K_not_in_group |
| Medtr8g072550   | diacylglycerol acyltransferase     | AM+K_not_in_group |

diffusion\_prioritization\_ALL

|                 |                                    |                   |
|-----------------|------------------------------------|-------------------|
| Medtr8g079050   | GDSL-like lipase/acylhydrolase     | AM+K_not_in_group |
| Medtr3g467100   | Lipid transfer protein             | AM+K_not_in_group |
| Medtr3g113800   | E2F transcription factor           | AM+K_not_in_group |
| Medtr4g046713   | peroxidase family protein          | AM+K_not_in_group |
| Medtr4g094100   | aphthoate octaprenyltransferase    | AM+K_not_in_group |
| Medtr3g033810   | oside hydrolase family 1 protein   | AM+K_not_in_group |
| Medtr4g121960   | ubiquitin-conjugating enzyme       | AM+K_not_in_group |
| Medtr7g062580   | xygenase family oxidoreductase     | AM+K_not_in_group |
| Medtr5g094440   | nucleic acid-binding protein       | AM+K_not_in_group |
| Medtr2g013570   | phosphoglycerate mutase            | AM+K_not_in_group |
| Medtr1g098550   | cellulose synthase-like protein    | AM+K_not_in_group |
| Medtr3g116590_s | kinase plant (other strand read)   | AM+K_not_in_group |
| Medtr3g117500   | cosyl hydrolase family 9 protein   | AM+K_not_in_group |
| Medtr4g107620   | LRR receptor-like kinase           | AM+K_not_in_group |
| Medtr2g088470   | omeobox leucine zipper protein     | AM+K_not_in_group |
| Medtr5g089820   | DUF4228 domain protein             | AM+K_not_in_group |
| Medtr4g081655   | ocus lectin kinase family protein  | AM+K_not_in_group |
| Medtr1g064630   | Threonine kinase stpk-V protein    | AM+K_not_in_group |
| Medtr3g007240   | transporting ATPase-like protein   | AM+K_not_in_group |
| Medtr4g055610   | o acid transporter family protein  | AM+K_not_in_group |
| Medtr5g011800   | DUF1442 family protein             | AM+K_not_in_group |
| Medtr7g105870   | harpin-induced-like protein        | AM+K_not_in_group |
| Medtr8g009510   | dynamamin 1E-like protein          | AM+K_not_in_group |
| Medtr7g079320   | LysM type receptor kinase          | AM+K_not_in_group |
| Medtr4g062450   | netal-associated domain protein    | AM+K_not_in_group |
| Medtr8g032300   | rg (CaLB domain) family protein    | AM+K_not_in_group |
| Medtr6g007160   | ProtKB/Swiss-Prot;Acc:O24088]      | AM+K_not_in_group |
| Medtr4g021023   | l (TIR-NBS-LRR class), putative    | AM+K_not_in_group |
| Medtr7g050980   | asterase/pectinesterase inhibitor  | AM+K_not_in_group |
| Medtr7g098550   | chrome P450 family 709 protein     | AM+K_not_in_group |
| Medtr8g045490   | ted protein bet V I family protein | AM+K_not_in_group |
| Medtr5g035980   | transducin/WD40 repeat protein     | AM+K_not_in_group |
| Medtr4g102790   | GRAS family transcription factor   | AM+K_not_in_group |
| Medtr8g091390   | L-ascorbate oxidase                | AM+K_not_in_group |
| Medtr4g099290   | ureidoglycine aminohydrolase       | AM+K_not_in_group |
| Medtr1g027830   | ress-induced receptor-like kinase  | AM+K_not_in_group |
| Medtr6g072010   | ,5-trisphosphate 5-phosphatase     | AM+K_not_in_group |
| Medtr7g010820   | peptide/nitrate transporter        | AM+K_not_in_group |
| Medtr7g113360   | ger (Ran-binding) family protein   | AM+K_not_in_group |
| Medtr1g026870   | transcription repressor MYB5       | AM+K_not_in_group |
| Medtr1g062930   | pectate lyase-like protein         | AM+K_not_in_group |
| Medtr1g075680   | kinesin motor domain protein       | AM+K_not_in_group |
| Medtr3g067940   | hell cycle switch protein CCS52a   | AM+K_not_in_group |
| Medtr3g080410   | oside hydrolase family 17 protein  | AM+K_not_in_group |
| Medtr3g110028   | transcription repressor MYB5       | AM+K_not_in_group |
| Medtr4g065990   | core histone H2A/H2B/H3/H4         | AM+K_not_in_group |
| Medtr4g078740   | reticulon-like protein B2          | AM+K_not_in_group |
| Medtr4g132160   | ransmembrane protein, putative     | AM+K_not_in_group |
| Medtr7g106900   | bor of Son-like protein, putative  | AM+K_not_in_group |
| Medtr7g113520   | kinesin motor domain protein       | AM+K_not_in_group |
| Medtr8g023090   | Defensin-like protein              | AM+K_not_in_group |



## diffusion\_prioritization\_ALL

|               |                                        |                   |
|---------------|----------------------------------------|-------------------|
| Medtr7g077010 | Ripening related protein family        | AM+K_not_in_group |
| Medtr4g079800 | papain family cysteine protease        | AM+K_not_in_group |
| Medtr2g005870 | rotKB/Swiss-Prot;Acc:Q6RHR6]           | AM+K_not_in_group |
| Medtr7g056450 | ocus lectin kinase family protein      | AM+K_not_in_group |
| Medtr3g105470 | air protein pso2/SNM1, putative        | AM+K_not_in_group |
| Medtr5g016870 | tone-lysine N-methyltransferase        | AM+K_not_in_group |
| Medtr5g005290 | hypothetical protein                   | AM+K_in_group     |
| Medtr5g005770 | fantastic four-like protein            | AM+K_not_in_group |
| Medtr1g016080 | kaline phytoceramidase (APHC)          | AM+K_not_in_group |
| Medtr2g020710 | rter (SP) family MFS transporter       | AM+K_not_in_group |
| Medtr2g093060 | e-responsive transcription factor      | AM+K_not_in_group |
| Medtr5g097480 | GRAS family transcription factor       | AM+K_not_in_group |
| Medtr8g447220 | cid-binding copine family protein      | AM+K_not_in_group |
| Medtr1g111060 | hypothetical protein                   | AM+K_not_in_group |
| Medtr4g071390 | MATE efflux family protein             | AM+K_not_in_group |
| Medtr5g016010 | peroxidase family protein              | AM+K_not_in_group |
| Medtr6g011310 | plasma membrane H <sup>+</sup> -ATPase | AM+K_not_in_group |
| Medtr8g091530 | SAP domain protein                     | AM+K_not_in_group |
| Medtr8g098845 | MAP kinase                             | AM+K_not_in_group |
| Medtr8g087570 | main disease resistance protein        | AM+K_not_in_group |
| Medtr7g106580 | dihydroneopterin aldolase              | AM+K_not_in_group |
| Medtr4g057270 | transcription factor                   | AM+K_not_in_group |
| Medtr2g087230 | ceptor kinase TMK1-like protein        | AM+K_not_in_group |
| Medtr2g062850 | /Threonine kinase family protein       | AM+K_not_in_group |
| Medtr2g436750 | clasp amino-terminal protein           | AM+K_not_in_group |
| Medtr3g070920 | histone H4 domain protein              | AM+K_not_in_group |
| Medtr2g055990 | DUF617 family protein                  | AM+K_not_in_group |
| Medtr2g096080 | CCT motif protein                      | AM+K_not_in_group |
| Medtr4g022370 | Dof domain zinc finger protein         | AM+K_not_in_group |
| Medtr4g097520 | e-responsive transcription factor      | AM+K_not_in_group |
| Medtr5g016610 | WRKY transcription factor              | AM+K_not_in_group |
| Medtr1g012920 | ransmembrane protein, putative         | AM+K_not_in_group |
| Medtr2g078060 | transferase superfamily protein        | AM+K_not_in_group |
| Medtr4g107400 | hpl2 protein precursor                 | AM+K_not_in_group |
| Medtr5g005420 | DUF1005 family protein                 | AM+K_not_in_group |
| Medtr5g018720 | DUF4228 domain protein                 | AM+K_not_in_group |
| Medtr7g109360 | c amino-terminal domain protein        | AM+K_not_in_group |
| Medtr8g018800 | ε-rich glycoprotein family protein     | AM+K_not_in_group |
| Medtr1g069085 | s etical protein (other strand read)   | AM+K_not_in_group |
| Medtr1g084780 | hypothetical protein                   | AM+K_not_in_group |
| Medtr1g107360 | -glucosyltransferase-like protein      | AM+K_not_in_group |
| Medtr2g086680 | pollen Ole e I family allergen         | AM+K_not_in_group |
| Medtr3g008530 | soluble acid invertase FRUCT2          | AM+K_not_in_group |
| Medtr4g062190 | oacyl-CoA synthase-like protein        | AM+K_not_in_group |
| Medtr4g094090 | x ABC transporter family protein       | AM+K_not_in_group |
| Medtr4g114570 | ethylene response factor               | AM+K_not_in_group |
| Medtr4g066650 | itin-protein ligase ARI7, putative     | AM+K_not_in_group |
| Medtr4g086470 | CXE carboxylesterase                   | AM+K_not_in_group |
| Medtr2g087680 | receptor-like kinase                   | AM+K_not_in_group |
| Medtr1g038430 | c amino-terminal domain protein        | AM+K_not_in_group |
| Medtr1g061170 | εat shock transcription factor A3      | AM+K_not_in_group |

## diffusion\_prioritization\_ALL

|               |                                       |                   |
|---------------|---------------------------------------|-------------------|
| Medtr1g114300 | PR containing plant-like protein      | AM+K_not_in_group |
| Medtr2g009660 | tars family protein abracl protein    | AM+K_not_in_group |
| Medtr2g073370 | B-box type zinc finger protein        | AM+K_not_in_group |
| Medtr3g037390 | ssion 1/PRR response regulator        | AM+K_not_in_group |
| Medtr3g082510 | RING-H2 zinc finger protein           | AM+K_not_in_group |
| Medtr3g082630 | B-box type zinc finger protein        | AM+K_not_in_group |
| Medtr4g066010 | hypothetical protein                  | AM+K_not_in_group |
| Medtr4g084270 | phomannomutase family protein         | AM+K_not_in_group |
| Medtr4g087160 | t embryo arrest protein, putative     | AM+K_not_in_group |
| Medtr4g095660 | amidase/formamidase, putative         | AM+K_not_in_group |
| Medtr4g099050 | ethphon-induced protein               | AM+K_not_in_group |
| Medtr4g108880 | se regulator-like APRR7 protein       | AM+K_not_in_group |
| Medtr5g025750 | ransmembrane protein, putative        | AM+K_not_in_group |
| Medtr7g010710 | meta-ocimene/myrcene synthase         | AM+K_not_in_group |
| Medtr7g033165 | GDSL-like lipase/acylhydrolase        | AM+K_not_in_group |
| Medtr7g084990 | hypothetical protein                  | AM+K_not_in_group |
| Medtr7g088740 | alpha-glucanotransferase DPE2         | AM+K_not_in_group |
| Medtr8g069760 | alpha-glucan water dikinase           | AM+K_not_in_group |
| Medtr8g077180 | uble inorganic pyrophosphatase        | AM+K_not_in_group |
| Medtr8g105590 | sh repeat F-box protein, putative     | AM+K_not_in_group |
| Medtr2g044940 | hypothetical protein                  | AM+K_not_in_group |
| Medtr2g025690 | molecular chaperone regulator 5       | AM+K_not_in_group |
| Medtr6g069870 | jasmonate zim-domain protein          | AM+K_not_in_group |
| Medtr6g012970 | ERF domain transcription factor       | AM+K_not_in_group |
| Medtr2g089100 | GRAS family transcription factor      | AM+K_not_in_group |
| Medtr1g007360 | early nodulin 93                      | AM+K_not_in_group |
| Medtr8g040080 | s motif protein (other strand read)   | AM+K_not_in_group |
| Medtr8g007065 | patatin-like phospholipase            | AM+K_not_in_group |
| Medtr5g069600 | receptor-like cytoplasmic kinase      | AM+K_not_in_group |
| Medtr2g013880 | DUF506 family protein                 | AM+K_not_in_group |
| Medtr3g088835 | s it-like protein (other strand read) | AM+K_not_in_group |
| Medtr3g093010 | rter (SP) family MFS transporter      | AM+K_not_in_group |
| Medtr4g015450 | DUF247 domain protein                 | AM+K_not_in_group |
| Medtr4g062480 | PR containing plant-like protein      | AM+K_not_in_group |
| Medtr5g012860 | ransmembrane protein, putative        | AM+K_not_in_group |
| Medtr7g050720 | riptional factor B3 family protein    | AM+K_not_in_group |
| Medtr7g052300 | hypothetical protein                  | AM+K_not_in_group |
| Medtr4g071110 | zinc finger, LRP1 type protein        | AM+K_not_in_group |
| Medtr1g094155 | ne carboxypeptidase-like protein      | AM+K_not_in_group |
| Medtr1g057790 | BEL1-related homeotic protein         | AM+K_not_in_group |
| Medtr1g075260 | te hydrolase superfamily protein      | AM+K_not_in_group |
| Medtr1g106030 | phytosulfokine precursor protein      | AM+K_not_in_group |
| Medtr1g115285 | CASP-like protein                     | AM+K_not_in_group |
| Medtr2g094520 | eodomain leucine zipper protein       | AM+K_not_in_group |
| Medtr6g464510 | berellin receptor GID1, putative      | AM+K_not_in_group |
| Medtr8g026730 | auxin-responsive family protein       | AM+K_not_in_group |
| Medtr2g024290 | LysM receptor kinase K1B              | AM+K_not_in_group |
| Medtr3g463530 | ent bundling protein P-115-ABP        | AM+K_not_in_group |
| Medtr1g021652 | ly fatty acid hydroperoxide lyase     | AM+K_not_in_group |
| Medtr2g034370 | ransmembrane protein, putative        | AM+K_not_in_group |
| Medtr8g089830 | hypothetical protein                  | AM+K_in_group     |

diffusion\_prioritization\_ALL

|                |                                      |                   |
|----------------|--------------------------------------|-------------------|
| Medtr4g090520  | putative GRP family                  | AM+K_not_in_group |
| Medtr2g083220  | ain of gyp1p superfamily protein     | AM+K_not_in_group |
| Medtr4g019040  | hypothetical protein                 | AM+K_not_in_group |
| Medtr1g100800  | plant/K24M7-17 protein               | AM+K_not_in_group |
| Medtr4g115620  | osphate synthase family protein      | AM+K_not_in_group |
| Medtr2g014235  | hypothetical protein                 | AM+K_not_in_group |
| Medtr3g035335  | hypothetical protein                 | AM+K_not_in_group |
| Medtr7g081462  | hypothetical protein                 | AM+K_not_in_group |
| Medtr7g100630  | LRR receptor-like kinase             | AM+K_not_in_group |
| Medtr1g012850  | calcium-binding EF hand protein      | AM+K_not_in_group |
| Medtr3g099090  | F-box/LRR plant protein              | AM+K_not_in_group |
| Medtr3g108690  | ransmembrane protein, putative       | AM+K_not_in_group |
| Medtr3g116500  | protein beta subunit-like protein    | AM+K_not_in_group |
| Medtr5g078170  | hypothetical protein                 | AM+K_not_in_group |
| Medtr7g111540  | anicillin N epimerase-like protein   | AM+K_not_in_group |
| Medtr8g023700  | ption factor ERF118-like protein     | AM+K_not_in_group |
| Medtr8g027525  | hypothetical protein                 | AM+K_not_in_group |
| Medtr7g111290  | myb transcription factor             | AM+K_not_in_group |
| Medtr3g011730  | pecificity kinase domain protein     | AM+K_not_in_group |
| Medtr4g091600  | PR containing plant-like protein     | AM+K_not_in_group |
| Medtr6g078490  | NB-ARC domain protein                | AM+K_not_in_group |
| Medtr8g087930  | rehalose-6-phosphate synthase        | AM+K_not_in_group |
| Medtr3g079850  | rich receptor-kinase-like protein    | AM+K_not_in_group |
| Medtr5g070680  | ubiquinol oxidase 1a                 | AM+K_not_in_group |
| Medtr8g068390  | tosolic Serine/Threonine-kinase      | AM+K_not_in_group |
| Medtr1g017900  | hypothetical protein                 | AM+K_not_in_group |
| Medtr8g076880  | lylinositol transfer family protein  | AM+K_not_in_group |
| Medtr8g086390  | LRR receptor-like kinase             | AM+K_not_in_group |
| Medtr8g098470  | epolymerizing factor-like protein    | AM+K_not_in_group |
| Medtr7g080550  | enosylhomocysteinase, putative       | AM+K_not_in_group |
| Medtr1g110510  | S1/P1 nuclease family protein        | AM+K_not_in_group |
| Medtr4g077940  | protein transporter                  | AM+K_not_in_group |
| Medtr7g090520  | utarate-dependent dioxygenase        | AM+K_not_in_group |
| Medtr0536s0020 | ucosyltransferase family protein     | AM+K_not_in_group |
| Medtr1g092880  | abundant transcript-like protein     | AM+K_not_in_group |
| Medtr2g009270  | utanone 4-phosphate synthase         | AM+K_not_in_group |
| Medtr3g088675  | stilbene synthase family protein     | AM+K_not_in_group |
| Medtr3g093970  | hypothetical protein                 | AM+K_not_in_group |
| Medtr3g096070  | affeic acid O-methyltransferase      | AM+K_not_in_group |
| Medtr4g083570  | zinc/iron transport family protein   | AM+K_not_in_group |
| Medtr4g095075  | etal transporter Nramp3 protein      | AM+K_not_in_group |
| Medtr4g104610  | ochrome P450 family 71 protein       | AM+K_not_in_group |
| Medtr4g107440  | zinc ion-binding protein             | AM+K_not_in_group |
| Medtr4g127580  | porting P-type ATPase, putative      | AM+K_not_in_group |
| Medtr5g043645  | s etical protein (other strand read) | AM+K_not_in_group |
| Medtr6g465300  | ABC transporter family protein       | AM+K_not_in_group |
| Medtr1g073860  | notif DNA-binding family protein     | AM+K_not_in_group |
| Medtr7g027020  | RALF-like protein                    | AM+K_not_in_group |
| Medtr5g044160  | 14-3-like protein GF14               | AM+K_not_in_group |
| Medtr0042s0190 | yl alcohol O-benzoyltransferase      | AM+K_not_in_group |
| Medtr0069s0020 | ransmembrane protein, putative       | AM+K_not_in_group |

## diffusion\_prioritization\_ALL

|                |                                        |                   |
|----------------|----------------------------------------|-------------------|
| Medtr1g050570  | hypothetical protein                   | AM+K_not_in_group |
| Medtr2g007510  | hypothetical protein                   | AM+K_not_in_group |
| Medtr2g063000  | carboxypeptidase-like protein          | AM+K_not_in_group |
| Medtr3g055700  | transmembrane protein, putative        | AM+K_not_in_group |
| Medtr3g462080  | hypothetical protein                   | AM+K_not_in_group |
| Medtr4g036550  | nuclear division RFT1-like protein     | AM+K_not_in_group |
| Medtr4g081270  | cyt protein (TIR-NBS-LRR class)        | AM+K_not_in_group |
| Medtr4g106400  | hypothetical protein                   | AM+K_not_in_group |
| Medtr5g039440  | mucin-like protein                     | AM+K_not_in_group |
| Medtr6g074620  | cyt protein (TIR-NBS-LRR class)        | AM+K_not_in_group |
| Medtr6g074660  | cyt protein (TIR-NBS-LRR class)        | AM+K_not_in_group |
| Medtr7g060330  | DUF247 domain protein                  | AM+K_not_in_group |
| Medtr8g018550  | seed linoleate 9S-lipoxygenase         | AM+K_not_in_group |
| Medtr8g088890  | glutelin type-B-like protein           | AM+K_not_in_group |
| Medtr2g096520  | hyal-CpG-binding domain protein        | AM+K_not_in_group |
| Medtr3g116200  | plant DNA-binding domain protein       | AM+K_not_in_group |
| Medtr7g073660  | feronia receptor-like kinase           | AM+K_not_in_group |
| Medtr4g095012  | LRR receptor-like kinase               | AM+K_not_in_group |
| Medtr1g031560  | stress-induced receptor-like kinase    | AM+K_not_in_group |
| Medtr6g074875  | cyt protein (TIR-NBS-LRR class)        | AM+K_not_in_group |
| Medtr3g095180  | transmembrane protein, putative        | AM+K_not_in_group |
| Medtr4g035310  | RNA recognition motif                  | AM+K_not_in_group |
| Medtr2g450040  | cytochrome P450 family protein         | AM+K_not_in_group |
| Medtr4g123040  | myb transcription factor               | AM+K_not_in_group |
| Medtr8g086050  | peroxisomal protein, putative          | AM+K_not_in_group |
| Medtr8g089820  | reductase trans-splicing protein       | AM+K_not_in_group |
| Medtr2g075830  | papain family cysteine protease        | AM+K_not_in_group |
| Medtr4g080730  | papain family cysteine protease        | AM+K_in_group     |
| Medtr4g107930  | papain family cysteine protease        | AM+K_not_in_group |
| Medtr6g011860  | domain class transcription factor      | AM+K_in_group     |
| Medtr8g006790  | plasma membrane H <sup>+</sup> -ATPase | AM+K_not_in_group |
| Medtr1g086950  | transmembrane protein, putative        | AM+K_not_in_group |
| Medtr4g082315  | amp24/gp25L/p24 family protein         | AM+K_not_in_group |
| Medtr4g105130  | myb transcription factor               | AM+K_not_in_group |
| Medtr1g082300  | na amplified sequence 3 protein        | AM+K_not_in_group |
| Medtr2g090650  | hypothetical protein                   | AM+K_not_in_group |
| Medtr4g084910  | mRNA-associated-like-Sm protein        | AM+K_not_in_group |
| Medtr4g121080  | COBRA-like protein 7 precursor         | AM+K_not_in_group |
| Medtr5g009350  | long-chain fatty acyl CoA ligase       | AM+K_not_in_group |
| Medtr5g068710  | autophagy-related protein              | AM+K_not_in_group |
| Medtr7g117890  | spotted leaf protein, putative         | AM+K_not_in_group |
| Medtr8g041660  | rich receptor-kinase-like protein      | AM+K_not_in_group |
| Medtr5g030920  | ProtKB/Swiss-Prot;Acc:Q8L4H4]          | AM+K_not_in_group |
| Medtr0062s0020 | hydrolase family 18 protein            | AM+K_not_in_group |
| Medtr1g061790  | hypothetical protein                   | AM+K_not_in_group |
| Medtr3g055720  | main disease resistance protein        | AM+K_not_in_group |
| Medtr4g083960  | phosphate transporter                  | AM+K_not_in_group |
| Medtr4g094220  | ucosyltransferase family protein       | AM+K_in_group     |
| Medtr4g134140  | universal stress family protein        | AM+K_not_in_group |
| Medtr5g035530  | main disease resistance protein        | AM+K_not_in_group |
| Medtr5g062240  | hypothetical protein                   | AM+K_not_in_group |

## diffusion\_prioritization\_ALL

|                 |                                    |                   |
|-----------------|------------------------------------|-------------------|
| Medtr6g013135   | hypothetical protein               | AM+K_not_in_group |
| Medtr6g046750   | NBS-LRR resistance protein         | AM+K_not_in_group |
| Medtr7g098300   | sporster-like ABC domain protein   | AM+K_not_in_group |
| Medtr8g070055_s | -like protein (other strand read)  | AM+K_not_in_group |
| Medtr1g484940   | c proteinase superfamily protein   | AM+K_not_in_group |
| Medtr1g082680   | ransmembrane protein, putative     | AM+K_not_in_group |
| Medtr2g013370   | Dof domain zinc finger protein     | AM+K_not_in_group |
| Medtr7g105030   | 125 kDa kinesin-like protein       | AM+K_not_in_group |
| Medtr1g492820   | ochrome P450 family 87 protein     | AM+K_not_in_group |
| Medtr2g060720   | )plant tudor-like domain protein   | AM+K_not_in_group |
| Medtr3g048290   | ox/RNI/FBD-like domain protein     | AM+K_not_in_group |
| Medtr3g052290   | hypothetical protein               | AM+K_not_in_group |
| Medtr3g071750   | hypothetical protein               | AM+K_not_in_group |
| Medtr3g113070   | salt tolerance-like protein        | AM+K_not_in_group |
| Medtr3g463110   | hypothetical protein               | AM+K_not_in_group |
| Medtr4g092990   | MADS-box transcription factor      | AM+K_not_in_group |
| Medtr7g101150   | ubiquitin-protein ligase, putative | AM+K_not_in_group |
| Medtr8g044960   | hypothetical protein               | AM+K_not_in_group |
| Medtr8g447290   | MYND finger protein                | AM+K_not_in_group |
| Medtr2g007340   | 3HC4 type (RING finger) protein    | AM+K_not_in_group |
| Medtr3g074260   | plant/F14D7-9 protein              | AM+K_not_in_group |
| Medtr4g107860   | 20/alpha crystallin family protein | AM+K_not_in_group |
| Medtr8g076620   | zinc finger, LRP1 type protein     | AM+K_not_in_group |
| Medtr2g029540   | ylation specificity factor CPSF30  | AM+K_not_in_group |
| Medtr2g080220   | ceptor-like kinase family protein  | AM+K_not_in_group |
| Medtr5g064120   | l/RBD/RNP motif) family protein    | AM+K_not_in_group |
| Medtr1g048110   | ne endopeptidase family protein    | AM+K_not_in_group |
| Medtr5g030910   | x ABC transporter family protein   | AM+K_not_in_group |
| Medtr1g089760   | DUF3595 family protein             | AM+K_not_in_group |
| Medtr8g028080   | ribonuclease T2 family protein     | AM+K_not_in_group |
| Medtr3g089570   | pollen Ole e I family allergen     | AM+K_not_in_group |
| Medtr0511s0010  | l (TIR-NBS-LRR class), putative    | AM+K_not_in_group |
| Medtr3g058880   | se protein (TIR-NBS-LRR class)     | AM+K_not_in_group |
| Medtr6g021900   | hypothetical protein               | AM+K_not_in_group |
| Medtr4g029730   | hypothetical protein               | AM+K_not_in_group |
| Medtr3g108190   | sulfate transporter-like protein   | AM+K_not_in_group |
| Medtr7g021860   | ransmembrane protein, putative     | AM+K_not_in_group |
| Medtr3g087530   | ethylene insensitive protein       | AM+K_not_in_group |
| Medtr4g014280   | l (TIR-NBS-LRR class), putative    | AM+K_not_in_group |
| Medtr8g011780   | eonine-kinase OXI1-like protein    | AM+K_not_in_group |
| Medtr8g012340   | isomerase FKBP62-like protein      | AM+K_not_in_group |
| Medtr2g064470   | transcription factor-like protein  | AM+K_not_in_group |
| Medtr6g033675   | UDP-glucosyl transferase 88A1      | AM+K_not_in_group |
| Medtr1g067320   | ransmembrane protein, putative     | AM+K_not_in_group |
| Medtr4g029170   | peroxidase family protein          | AM+K_not_in_group |
| Medtr4g127040   | VRKY family transcription factor   | AM+K_not_in_group |
| Medtr5g036080   | matrix metalloproteinase           | AM+K_not_in_group |
| Medtr7g067510   | alactosyltransferase-like protein  | AM+K_not_in_group |
| Medtr7g072170   | LURP-one-like protein              | AM+K_not_in_group |
| Medtr6g038790   | e kinase family protein, putative  | AM+K_not_in_group |
| Medtr2g083380   | ucosyltransferase family protein   | AM+K_not_in_group |

## diffusion\_prioritization\_ALL

|               |                                      |                   |
|---------------|--------------------------------------|-------------------|
| Medtr8g096700 | netal-associated domain protein      | AM+K_not_in_group |
| Medtr2g071790 | hypothetical protein                 | AM+K_not_in_group |
| Medtr4g015180 | anin 5-aromatic acyltransferase      | AM+K_not_in_group |
| Medtr7g028590 | r transcription factor-like protein  | AM+K_not_in_group |
| Medtr8g021230 | inhibitor heavy chain-like protein   | AM+K_not_in_group |
| Medtr6g452730 | PAR1 protein                         | AM+K_not_in_group |
| Medtr3g086050 | calized small heat shock protein     | AM+K_not_in_group |
| Medtr5g021240 | ydroxyglutarate dehydrogenase        | AM+K_not_in_group |
| Medtr7g090510 | UDP-sulfoquinovose synthase          | AM+K_not_in_group |
| Medtr2g014560 | ceptor-like kinase family protein    | AM+K_not_in_group |
| Medtr7g086410 | s etical protein (other strand read) | AM+K_not_in_group |
| Medtr1g098300 | cyclin-dependent kinase              | AM+K_not_in_group |
| Medtr4g094620 | hypothetical protein                 | AM+K_not_in_group |
| Medtr3g117750 | ptidyl-prolyl cis-trans isomerase    | AM+K_not_in_group |
| Medtr6g023390 | active LRR receptor-like kinase      | AM+K_not_in_group |
| Medtr8g066470 | hypothetical protein                 | AM+K_not_in_group |
| Medtr4g092820 | l-tRNA reductase family protein      | AM+K_not_in_group |
| Medtr1g040195 | yl alcohol O-benzoyltransferase      | AM+K_not_in_group |
| Medtr2g022190 | !ING zinc finger protein, putative   | AM+K_not_in_group |
| Medtr2g104230 | SAM domain protein                   | AM+K_not_in_group |
| Medtr4g083330 | pyruvate kinase family protein       | AM+K_not_in_group |
| Medtr7g070250 | ation inhibition factor-like protein | AM+K_not_in_group |
| Medtr3g101520 | B3 domain transcription factor       | AM+K_not_in_group |
| Medtr6g016820 | side hydrolase family 81 protein     | AM+K_not_in_group |
| Medtr3g104750 | NRKY family transcription factor     | AM+K_not_in_group |
| Medtr2g025180 | alcium-binding EF hand protein       | AM+K_not_in_group |
| Medtr8g066770 | transcription factor                 | AM+K_in_group     |
| Medtr5g006230 | STN7, related protein, putative      | AM+K_not_in_group |
| Medtr7g108890 | sterase/pectinesterase inhibitor     | AM+K_not_in_group |
| Medtr5g023170 | apanese-related sulfurtransferase    | AM+K_not_in_group |
| Medtr1g025290 | hypothetical protein                 | AM+K_not_in_group |
| Medtr1g025430 | heat shock protein 81-2              | AM+K_not_in_group |
| Medtr1g078030 | -binding START domain protein        | AM+K_not_in_group |
| Medtr1g105970 | tubulin alpha-6 chain, putative      | AM+K_not_in_group |
| Medtr2g015500 | sterase/lipase plant-like protein    | AM+K_not_in_group |
| Medtr3g071970 | DUF399 family protein                | AM+K_not_in_group |
| Medtr3g091940 | ecretory pathway protein Sec39       | AM+K_not_in_group |
| Medtr3g098310 | ATP-dependent Clp protease           | AM+K_not_in_group |
| Medtr4g105110 | armadillo repeat only 1 protein      | AM+K_not_in_group |
| Medtr4g118355 | ruvate orthophosphate dikinase       | AM+K_not_in_group |
| Medtr5g022210 | chaperone protein DnaJ 11            | AM+K_not_in_group |
| Medtr5g032090 | ensitive ion channel-like protein    | AM+K_not_in_group |
| Medtr7g079540 | ort system, ATPase component         | AM+K_not_in_group |
| Medtr7g085310 | thioredoxin-like protein 1-1         | AM+K_not_in_group |
| Medtr8g009063 | ucosyltransferase family protein     | AM+K_not_in_group |
| Medtr8g070480 | plant/MCA23-20 protein               | AM+K_not_in_group |
| Medtr5g019650 | omeobox leucine zipper protein       | AM+K_not_in_group |
| Medtr5g018050 | menting 1(SNF1)-related kinase       | AM+K_not_in_group |
| Medtr3g090760 | ethylene response factor             | AM+K_not_in_group |
| Medtr5g070440 | B3 DNA-binding domain protein        | AM+K_not_in_group |
| Medtr3g095080 | NRKY family transcription factor     | AM+K_not_in_group |

diffusion\_prioritization\_ALL

|                |                                       |                   |
|----------------|---------------------------------------|-------------------|
| Medtr7g014610  | acyl-transferase family protein       | AM+K_not_in_group |
| Medtr1g031450  | galacturonan-binding protein          | AM+K_not_in_group |
| Medtr0004s0490 | related/COG complex component         | AM+K_not_in_group |
| Medtr3g088930  | receptor-like kinase family protein   | AM+K_not_in_group |
| Medtr2g007270  | hypothetical protein                  | AM+K_not_in_group |
| Medtr7g031470  | inactive LRR receptor-like kinase     | AM+K_not_in_group |
| Medtr4g095320  | hypothetical protein                  | AM+K_not_in_group |
| Medtr4g057585  | carboxypeptidase-like protein         | AM+K_not_in_group |
| Medtr4g015950  | protein, putative (other strand read) | AM+K_not_in_group |
| Medtr2g013490  | large subunit methyltransferase       | AM+K_not_in_group |
| Medtr5g093800  | Lipid transfer protein                | AM+K_not_in_group |
| Medtr5g093430  | DUF4408 domain protein                | AM+K_not_in_group |
| Medtr1g043220  | inorganic phosphate transporter       | AM+K_not_in_group |
| Medtr5g043880  | MYRKY family transcription factor     | AM+K_not_in_group |
| Medtr2g069320  | elongation factor EF-2 subunit        | AM+K_not_in_group |
| Medtr5g030950  | serine hydroxymethyltransferase       | AM+K_not_in_group |
| Medtr1g027640  | related receptor kinase-like protein  | AM+K_not_in_group |
| Medtr1g016010  | C2H2-type zinc finger protein         | AM+K_not_in_group |
| Medtr1g067260  | 302750) TAIR;Acc:AT5G02750]           | AM+K_not_in_group |
| Medtr3g014680  | transglutaminase family protein       | AM+K_not_in_group |
| Medtr3g098650  | 3 amino-terminal domain protein       | AM+K_not_in_group |
| Medtr7g117900  | ATP synthase delta chain              | AM+K_not_in_group |
| Medtr3g465790  | Kae1-associated kinase Bud32          | AM+K_not_in_group |
| Medtr1g113000  | transducin/WD-like repeat-protein     | AM+K_not_in_group |
| Medtr2g073050  | carboxyl-terminal peptidase           | AM+K_not_in_group |
| Medtr5g073750  | transmembrane protein, putative       | AM+K_not_in_group |
| Medtr7g490330  | histidine synthase family protein     | AM+K_not_in_group |
| Medtr8g006730  | ucosyltransferase family protein      | AM+K_not_in_group |
| Medtr8g042870  | inc induced facilitator-like protein  | AM+K_in_group     |
| Medtr8g096310  | bidirectional sugar transporter       | AM+K_not_in_group |
| Medtr8g058250  | LRR receptor-like kinase              | AM+K_not_in_group |
| Medtr4g025970  | cytochrome P450 family 71 protein     | AM+K_not_in_group |
| Medtr8g059605  | LRR receptor-like kinase              | AM+K_not_in_group |
| Medtr2g021340  | 1,4-beta-D-glucanase-like protein     | AM+K_not_in_group |
| Medtr1g049140  | AP2 domain transcription factor       | AM+K_not_in_group |
| Medtr3g108220  | zinc ion-binding protein              | AM+K_not_in_group |
| Medtr0171s0030 | cytochrome P450 family protein        | AM+K_not_in_group |
| Medtr1g072600  | legumin storage protein               | AM+K_not_in_group |
| Medtr1g072610  | glycinin G4                           | AM+K_not_in_group |
| Medtr2g042370  | membrane-associated-like protein      | AM+K_not_in_group |
| Medtr2g099560  | seed linoleate 9S-lipoxygenase        | AM+K_not_in_group |
| Medtr3g033510  | (SR) secreted peptide-like protein    | AM+K_not_in_group |
| Medtr3g117000  | Vicilin                               | AM+K_not_in_group |
| Medtr3g117015  | Vicilin                               | AM+K_not_in_group |
| Medtr6g022430  | cysteine proteinase inhibitor 5       | AM+K_not_in_group |
| Medtr6g069040  | protein (MIP) family transporter      | AM+K_not_in_group |
| Medtr7g059330  | B3 domain transcription factor        | AM+K_not_in_group |
| Medtr7g072760  | Lipid transfer protein                | AM+K_not_in_group |
| Medtr7g079770  | vicilin 47 kDa protein                | AM+K_not_in_group |
| Medtr7g096990  | legumin A2                            | AM+K_not_in_group |
| Medtr7g097000  | legumin A2                            | AM+K_not_in_group |

## diffusion\_prioritization\_ALL

|                |                                      |                   |
|----------------|--------------------------------------|-------------------|
| Medtr8g091310  | oxide hydrolase family 5 protein     | AM+K_not_in_group |
| Medtr8g095375  | Defensin MtDef4.7                    | AM+K_not_in_group |
| Medtr8g445140  | embryonic abundant-like protein      | AM+K_not_in_group |
| Medtr2g078540  | ransmembrane protein, putative       | AM+K_not_in_group |
| Medtr5g086040  | LysM receptor kinase K1B             | AM+K_not_in_group |
| Medtr1g014120  | plastocyanin-like domain protein     | AM+K_not_in_group |
| Medtr2g026550  | hypothetical protein                 | AM+K_not_in_group |
| Medtr4g076200  | ubiquitin-conjugating enzyme E2      | AM+K_not_in_group |
| Medtr5g012010  | syntaxin of plants 122 protein       | AM+K_not_in_group |
| Medtr5g078330  | histone H1 and h5 family protein     | AM+K_not_in_group |
| Medtr5g088980  | carboxy-terminal domain cyclin       | AM+K_not_in_group |
| Medtr8g081530  | plant/T21H19-170 protein             | AM+K_in_group     |
| Medtr8g062270  | ox/RNI/FBD-like domain protein       | AM+K_not_in_group |
| Medtr2g076970  | te hydrolase superfamily protein     | AM+K_not_in_group |
| Medtr7g018170  | zinc finger constans-like protein    | AM+K_not_in_group |
| Medtr3g064080  | LK (receptor-like kinase) protein    | AM+K_not_in_group |
| Medtr4g116130  | adenylate cyclase                    | AM+K_not_in_group |
| Medtr8g465160  | /Threonine kinase family protein     | AM+K_not_in_group |
| Medtr4g077180  | Lipid transfer protein               | AM+K_not_in_group |
| Medtr1g085680  | chrome P450 family 709 protein       | AM+K_not_in_group |
| Medtr4g075980  | transcription factor-like protein    | AM+K_not_in_group |
| Medtr6g082980  | ise galacturonan-binding protein     | AM+K_not_in_group |
| Medtr4g082560  | DHHC-type zinc finger protein        | AM+K_not_in_group |
| Medtr4g087780  | 318570) TAIR;Acc:AT4G18570]          | AM+K_not_in_group |
| Medtr1g090010  | hypothetical protein                 | AM+K_not_in_group |
| Medtr1g012430  | alpha/beta hydrolase fold protein    | AM+K_not_in_group |
| Medtr1g087150  | G/FYVE/PHD zinc finger protein       | AM+K_not_in_group |
| Medtr5g042910  | DUF1336 family protein               | AM+K_not_in_group |
| Medtr5g066770  | alacturonate lyase B-like protein    | AM+K_not_in_group |
| Medtr6g069600  | anolamine N-methyltransferase        | AM+K_not_in_group |
| Medtr3g085940  | checkpoint MAD2B-like protein        | AM+K_not_in_group |
| Medtr8g467560  | centromere C-like protein            | AM+K_not_in_group |
| Medtr6g012690  | scription factor mixta-like protein  | AM+K_not_in_group |
| Medtr4g124990  | LRR receptor-like kinase             | AM+K_not_in_group |
| Medtr2g034480  | scan endo-1,3-beta-glucosidase       | AM+K_not_in_group |
| Medtr4g052390  | file hydratase NIT4A-like protein    | AM+K_not_in_group |
| Medtr4g094010  | insporter family protein, putative   | AM+K_not_in_group |
| Medtr5g037700  | ce protein (TIR-NBS-LRR class)       | AM+K_not_in_group |
| Medtr8g104080  | ochrome P450 family 71 protein       | AM+K_not_in_group |
| Medtr4g078810  | ption activator GLK1-like protein    | AM+K_not_in_group |
| Medtr0170s0020 | s etical protein (other strand read) | AM+K_not_in_group |
| Medtr1g008460  | dration-responsive protein RD22      | AM+K_not_in_group |
| Medtr1g008470  | dration-responsive protein RD22      | AM+K_not_in_group |
| Medtr1g023170  | domain class transcription factor    | AM+K_not_in_group |
| Medtr1g054750  | ra hydrolase superfamily protein     | AM+K_not_in_group |
| Medtr1g103400  | vicilin 47 kDa protein               | AM+K_not_in_group |
| Medtr1g103620  | genesis abundant D-like protein      | AM+K_not_in_group |
| Medtr2g031920  | imily ent-kaurenoic acid oxidase     | AM+K_not_in_group |
| Medtr2g034550  | outer envelope pore protein          | AM+K_not_in_group |
| Medtr2g037525  | Defensin fusion                      | AM+K_not_in_group |
| Medtr2g069650  | seed maturation protein              | AM+K_not_in_group |



## diffusion\_prioritization\_ALL

|                |                                    |                   |
|----------------|------------------------------------|-------------------|
| Medtr2g076140  | cription factor TGA5-like protein  | AM+K_not_in_group |
| Medtr2g083160  | in (Conglutin / Ara h 6 allergen)  | AM+K_not_in_group |
| Medtr2g099570  | seed linoleate 9S-lipoxygenase     | AM+K_not_in_group |
| Medtr2g437580  | osphate transporter family protein | AM+K_not_in_group |
| Medtr3g084870  | lipoprotein                        | AM+K_not_in_group |
| Medtr3g111530  | ly fatty acid hydroperoxide lyase  | AM+K_not_in_group |
| Medtr3g466000  | gamma-glutamyltranspeptidase       | AM+K_not_in_group |
| Medtr4g016960  | genesis abundant protein B19.1A    | AM+K_not_in_group |
| Medtr4g053530  | ase) polymerase domain protein     | AM+K_not_in_group |
| Medtr4g056140  | ylcholine-sterol acyltransferase   | AM+K_not_in_group |
| Medtr4g097240  | e GMA12/MNN10 family protein       | AM+K_not_in_group |
| Medtr4g105200  | oleosin                            | AM+K_not_in_group |
| Medtr6g005040  | oleosin                            | AM+K_not_in_group |
| Medtr6g007125  | osin group486 secreted peptide     | AM+K_not_in_group |
| Medtr7g072730  | Lipid transfer protein             | AM+K_not_in_group |
| Medtr7g080030  | ulatory protein (seipin), putative | AM+K_not_in_group |
| Medtr7g096970  | glycinin G4                        | AM+K_not_in_group |
| Medtr7g113790  | basic 7S globulin-like protein     | AM+K_not_in_group |
| Medtr7g451500  | ne-Rich (NCR) secreted peptide     | AM+K_not_in_group |
| Medtr8g096620  | chain dehydrogenase/reductase      | AM+K_not_in_group |
| Medtr4g081880  | rotKB/Swiss-Prot;Acc:G7JG80]       | AM+K_not_in_group |
| Medtr5g025480  | side hydrolase family 18 protein   | AM+K_not_in_group |
| Medtr2g097980  | ate acyltransferase-like protein   | AM+K_not_in_group |
| Medtr3g083810  | hosphatase superfamily protein     | AM+K_not_in_group |
| Medtr4g026590  | Leginsulin/Albumin-1               | AM+K_not_in_group |
| Medtr5g080580  | DUF296 domain protein              | AM+K_not_in_group |
| Medtr1g025490  | ransmembrane protein, putative     | AM+K_not_in_group |
| Medtr2g034340  | hypothetical protein               | AM+K_not_in_group |
| Medtr3g105660  | )-binding rossmann-fold protein    | AM+K_not_in_group |
| Medtr6g090460  | hypothetical protein               | AM+K_not_in_group |
| Medtr7g101130  | upstream ORF protein, putative     | AM+K_not_in_group |
| Medtr1g069610  | hypothetical protein               | AM+K_not_in_group |
| Medtr2g036860  | ent bundling protein P-115-ABP     | AM+K_not_in_group |
| Medtr2g049770  | e DnaJ-domain protein, putative    | AM+K_not_in_group |
| Medtr5g026800  | ankyrin domain protein             | AM+K_not_in_group |
| Medtr7g104900  | l Rho GTPase activating protein    | AM+K_not_in_group |
| Medtr6g013050  | purple acid phosphatase            | AM+K_not_in_group |
| Medtr0939s0010 | ponsive element-binding protein    | AM+K_not_in_group |
| Medtr1g017920  | hypothetical protein               | AM+K_not_in_group |
| Medtr1g052515  | l-raffinose galactosyltransferase  | AM+K_not_in_group |
| Medtr1g072090  | genesis abundant D-like protein    | AM+K_not_in_group |
| Medtr1g077540  | protein (MIP) family transporter   | AM+K_not_in_group |
| Medtr1g081760  | genesis abundant D-like protein    | AM+K_not_in_group |
| Medtr1g082760  | )-binding rossmann-fold protein    | AM+K_not_in_group |
| Medtr1g090250  | oleosin                            | AM+K_not_in_group |
| Medtr1g094135  | papain family cysteine protease    | AM+K_not_in_group |
| Medtr1g098250  | holocarboxylase synthetase         | AM+K_not_in_group |
| Medtr2g038230  | hypothetical protein               | AM+K_not_in_group |
| Medtr2g039880  | regulatory protein NPR1            | AM+K_not_in_group |
| Medtr2g076220  | seed maturation protein            | AM+K_not_in_group |
| Medtr2g076230  | seed maturation protein            | AM+K_not_in_group |

diffusion\_prioritization\_ALL

|                 |                                             |                   |
|-----------------|---------------------------------------------|-------------------|
| Medtr2g079440   | Defensin MtDef1.1/MtDef1.2                  | AM+K_not_in_group |
| Medtr2g094020   | beta-galactosidase-like protein             | AM+K_not_in_group |
| Medtr2g105720   | hypothetical protein                        | AM+K_not_in_group |
| Medtr3g009180   | sorting-associated protein VPS9             | AM+K_not_in_group |
| Medtr3g019070   | ehydration stress) family protein           | AM+K_not_in_group |
| Medtr3g055600   | Na <sup>+</sup> /H <sup>+</sup> exchanger 1 | AM+K_not_in_group |
| Medtr3g076560   | ochrome P450 family 71 protein              | AM+K_not_in_group |
| Medtr3g077570   | glutaredoxin C4                             | AM+K_not_in_group |
| Medtr3g078637   | protein aminomethyltransferase              | AM+K_not_in_group |
| Medtr3g092320   | hypothetical protein                        | AM+K_not_in_group |
| Medtr3g095460   | αA-like transporter family protein          | AM+K_not_in_group |
| Medtr3g096890   | ransmembrane protein, putative              | AM+K_not_in_group |
| Medtr3g104390   | hypothetical protein                        | AM+K_not_in_group |
| Medtr4g029210   | Lipid transfer protein                      | AM+K_not_in_group |
| Medtr4g046757   | isocitrate lyase                            | AM+K_not_in_group |
| Medtr4g057960   | te hydrolase superfamily protein            | AM+K_in_group     |
| Medtr4g060780   | llergen gly M Bd 28 kDa protein             | AM+K_not_in_group |
| Medtr4g066130   | AMP-binding enzyme                          | AM+K_not_in_group |
| Medtr4g066130_s | ding enzyme (other strand read)             | AM+K_not_in_group |
| Medtr4g079690   | hypothetical protein                        | AM+K_not_in_group |
| Medtr4g083010   | hypothetical protein                        | AM+K_not_in_group |
| Medtr4g098480   | mbryogenesis abundant protein               | AM+K_not_in_group |
| Medtr4g111770   | oleosin                                     | AM+K_not_in_group |
| Medtr4g120040   | mbryogenesis abundant protein               | AM+K_not_in_group |
| Medtr4g121900   | outer envelope pore protein                 | AM+K_not_in_group |
| Medtr4g121940   | ed maturation PM36-like protein             | AM+K_not_in_group |
| Medtr4g131740_s | se/reductase (other strand read)            | AM+K_not_in_group |
| Medtr5g008220   | ransmembrane protein, putative              | AM+K_not_in_group |
| Medtr5g010250   | glutamate-cysteine ligase B                 | AM+K_not_in_group |
| Medtr5g020520   | ain/LEA domain protein, putative            | AM+K_not_in_group |
| Medtr5g029650   | syntaxin of plants protein                  | AM+K_not_in_group |
| Medtr5g064040   | outer arm dynein light chain 1              | AM+K_not_in_group |
| Medtr5g070350   | pfkB family carbohydrate kinase             | AM+K_not_in_group |
| Medtr5g074270   | GDSL-like lipase/acylhydrolase              | AM+K_not_in_group |
| Medtr5g082950   | lomain class transcription factor           | AM+K_not_in_group |
| Medtr5g084320   | ile-specific Glycine Rich Peptide           | AM+K_not_in_group |
| Medtr6g073120_s | gen, putative (other strand read)           | AM+K_not_in_group |
| Medtr6g074880   | oacyl-CoA synthase-like protein             | AM+K_not_in_group |
| Medtr7g035095   | plant/MGF10-16 protein                      | AM+K_not_in_group |
| Medtr7g069250   | all hydrophilic plant seed protein          | AM+K_not_in_group |
| Medtr7g070500   | eductase family oxidoreductase              | AM+K_not_in_group |
| Medtr7g072810   | Lipid transfer protein                      | AM+K_not_in_group |
| Medtr7g086350   | DUF639 family protein                       | AM+K_not_in_group |
| Medtr7g103280   | eed maturation protein, putative            | AM+K_not_in_group |
| Medtr7g108945   | ransmembrane protein, putative              | AM+K_not_in_group |
| Medtr8g042020   | ochrome P450 family 72 protein              | AM+K_not_in_group |
| Medtr8g058350   | pathogenesis-like protein                   | AM+K_not_in_group |
| Medtr7g090020   | BTB/POZ ankyrin repeat protein              | AM+K_not_in_group |
| Medtr2g098240   | /Threonine kinase family protein            | AM+K_not_in_group |
| Medtr1g019030   | ong chain base subunit, putative            | AM+K_not_in_group |
| Medtr1g102980   | auxin canalization protein                  | AM+K_not_in_group |

## diffusion\_prioritization\_ALL

|                                                    |                   |
|----------------------------------------------------|-------------------|
| Medtr2g013250 flavonol-4-reductase-like protein    | AM+K_not_in_group |
| Medtr3g064900 D-binding rossmann fold protein      | AM+K_not_in_group |
| Medtr4g115460 exostosin family protein             | AM+K_not_in_group |
| Medtr4g125470 odienoate reductase-like protein     | AM+K_not_in_group |
| Medtr5g061300_s etical protein (other strand read) | AM+K_not_in_group |
| Medtr6g012800 pectinesterase                       | AM+K_not_in_group |
| Medtr8g011550 main disease resistance protein      | AM+K_not_in_group |
| Medtr1g076650 id calcium-binding family protein    | AM+K_not_in_group |
| Medtr1g008500 iration-responsive protein RD22      | AM+K_not_in_group |
| Medtr3g058440 rotein interaction domain protein    | AM+K_not_in_group |
| Medtr2g024390 homeobox knotted-like protein        | AM+K_not_in_group |
| Medtr4g072860 auxin-responsive family protein      | AM+K_not_in_group |
| Medtr2g047848 ox/RNI/FBD-like domain protein       | AM+K_not_in_group |
| Medtr3g014608 ransmembrane protein, putative       | AM+K_not_in_group |
| Medtr2g007890 bidirectional sugar transporter      | AM+K_not_in_group |
| Medtr7g059455 LCR                                  | AM+K_not_in_group |
| Medtr7g111830 rA-like transporter family protein   | AM+K_not_in_group |
| Medtr3g037730 ) gene family member MtCLE11         | AM+K_not_in_group |
| Medtr4g094238 letoxification superfamily protein   | AM+K_not_in_group |
| Medtr5g033720 homeobox knotted-like protein        | AM+K_not_in_group |
| Medtr6g074470 ce protein (TIR-NBS-LRR class)       | AM+K_not_in_group |
| Medtr8g027255 ily zinc-binding protein, putative   | AM+K_not_in_group |
| Medtr2g011080 oxidoreductase, type IV protein      | AM+K_not_in_group |
| Medtr7g024300 iratase/isomerase family protein     | AM+K_not_in_group |
| Medtr2g015630 GDSL-like lipase/acylhydrolase       | AM+K_not_in_group |
| Medtr3g079180 ol dehydrogenase family protein      | AM+K_not_in_group |
| Medtr4g025690 asterase/pectinesterase inhibitor    | AM+K_not_in_group |
| Medtr3g071480 LRR receptor-like kinase             | AM+K_not_in_group |
| Medtr8g040730 sulfotransferase                     | AM+K_not_in_group |
| Medtr8g098425 ATP-binding protein                  | AM+K_not_in_group |
| Medtr4g072870 auxin-responsive family protein      | AM+K_not_in_group |
| Medtr0004s0230 hypothetical protein                | AM+K_not_in_group |
| Medtr1g030430 cation transporter ChaC              | AM+K_not_in_group |
| Medtr1g030640 DUF3326 family protein               | AM+K_not_in_group |
| Medtr1g073620 Thionin-like protein                 | AM+K_not_in_group |
| Medtr1g080950 3DP-D-mannose-3,5-epimerase          | AM+K_not_in_group |
| Medtr1g112320 DUF615 family protein                | AM+K_not_in_group |
| Medtr2g043230 GroES chaperonin                     | AM+K_not_in_group |
| Medtr2g437130 termination factor family protein    | AM+K_not_in_group |
| Medtr3g112050 ornithine carbamoyltransferase       | AM+K_not_in_group |
| Medtr3g115990 outer envelope pore protein          | AM+K_not_in_group |
| Medtr3g465100 thioredoxin superfamily protein      | AM+K_not_in_group |
| Medtr4g020090 racil phosphoribosyltransferase      | AM+K_not_in_group |
| Medtr4g046023 defective 1923 protein, putative     | AM+K_not_in_group |
| Medtr4g124910 GroES chaperonin                     | AM+K_not_in_group |
| Medtr5g040920 icopeptide (PPR) repeat protein      | AM+K_not_in_group |
| Medtr6g034205 DUF3143 family protein               | AM+K_not_in_group |
| Medtr7g069210 riochlorophyll synthase, putative    | AM+K_not_in_group |
| Medtr8g056860 c metalloprotease FTSH protein       | AM+K_not_in_group |
| Medtr8g075110 universal stress family protein      | AM+K_not_in_group |
| Medtr8g086060 redoxin family protein, putative     | AM+K_not_in_group |

diffusion\_prioritization\_ALL

|                |                                     |                   |
|----------------|-------------------------------------|-------------------|
| Medtr8g092080  | enosylmethionine carrier protein    | AM+K_not_in_group |
| Medtr7g086320  | hypothetical protein                | AM+K_not_in_group |
| Medtr0009s0250 | GDSL-like lipase/acylhydrolase      | AM+K_not_in_group |
| Medtr1g054205  | peroxidase family protein           | AM+K_not_in_group |
| Medtr4g109360  | 6-dehydrogenase family protein      | AM+K_not_in_group |
| Medtr8g018450  | seed linoleate 9S-lipoxygenase      | AM+K_not_in_group |
| Medtr1g069175  | GDSL-like lipase/acylhydrolase      | AM+K_not_in_group |
| Medtr2g008210  | ucosyltransferase family protein    | AM+K_not_in_group |
| Medtr2g010350  | ter spinster-like protein, putative | AM+K_not_in_group |
| Medtr2g014200  | sa promoter-binding-like protein    | AM+K_not_in_group |
| Medtr2g097950  | le dehydrogenase family protein     | AM+K_not_in_group |
| Medtr3g114810  | MFS transporter                     | AM+K_not_in_group |
| Medtr4g019310  | DUF674 family protein               | AM+K_not_in_group |
| Medtr4g037480  | ransmembrane protein, putative      | AM+K_not_in_group |
| Medtr4g122940  | desiccation PCC13-like protein      | AM+K_not_in_group |
| Medtr5g019950  | porter TauE/SafE family protein     | AM+K_not_in_group |
| Medtr5g035150  | like acyl-esterase family protein   | AM+K_not_in_group |
| Medtr5g045300  | hypothetical protein                | AM+K_not_in_group |
| Medtr6g021530  | GDSL-like lipase/acylhydrolase      | AM+K_not_in_group |
| Medtr6g027580  | cation calcium exchanger            | AM+K_not_in_group |
| Medtr7g109830  | long-chain fatty acyl CoA ligase    | AM+K_not_in_group |
| Medtr8g005960  | sa promoter-binding-like protein    | AM+K_not_in_group |
| Medtr8g020770  | auxin-binding protein ABP19a        | AM+K_not_in_group |
| Medtr8g087870  | GDSL-like lipase/acylhydrolase      | AM+K_not_in_group |
| Medtr1g017830  | hypothetical protein                | AM+K_not_in_group |
| Medtr7g070050  | abscisic acid receptor              | AM+K_not_in_group |
| Medtr8g094180  | core-2/l-branching enzyme           | AM+K_not_in_group |
| Medtr7g076030  | shaggy-like kinase                  | AM+K_not_in_group |
| Medtr4g063690  | ne-Rich (NCR) secreted peptide      | AM+K_not_in_group |
| Medtr5g017980  | g domain, shaqkyf class protein     | AM+K_not_in_group |
| Medtr1g045860  | embryonic abundant-like protein     | AM+K_not_in_group |
| Medtr2g029730  | peroxidase family protein           | AM+K_not_in_group |
| Medtr2g033580  | desiccation PCC13-like protein      | AM+K_not_in_group |
| Medtr3g114420  | subtilisin-like serine protease     | AM+K_not_in_group |
| Medtr4g009080  | s abundant-like protein, putative   | AM+K_not_in_group |
| Medtr6g007670  | bunit 11 RING-H2 finger protein     | AM+K_not_in_group |
| Medtr6g054960  | hyl-CpG-binding domain              | AM+K_not_in_group |
| Medtr7g018000  | SCR                                 | AM+K_not_in_group |
| Medtr7g072993  | Lipid transfer protein              | AM+K_not_in_group |
| Medtr7g113640  | precursor GPI-anchored protein      | AM+K_not_in_group |
| Medtr8g020490  | myb transcription factor            | AM+K_not_in_group |
| Medtr8g446900  | auxin response factor 14            | AM+K_not_in_group |
| Medtr7g084250  | tyrosine kinase family protein      | AM+K_not_in_group |
| Medtr1457s0010 | side hydrolase family 18 protein    | AM+K_not_in_group |
| Medtr1g099040  | serine decarboxylase                | AM+K_not_in_group |
| Medtr2g026920  | Lipid transfer protein              | AM+K_not_in_group |
| Medtr3g067535  | albumin I                           | AM+K_not_in_group |
| Medtr3g067555  | albumin I                           | AM+K_not_in_group |
| Medtr3g117485  | xygenase family oxidoreductase      | AM+K_not_in_group |
| Medtr3g435460  | l chlorophyll A/B-binding protein   | AM+K_not_in_group |
| Medtr4g022760  | e acyl-transferase family protein   | AM+K_not_in_group |

## diffusion\_prioritization\_ALL

|                                                   |                   |
|---------------------------------------------------|-------------------|
| Medtr4g028310_s nsfer protein (other strand read) | AM+K_not_in_group |
| Medtr4g029350 Lipid transfer protein              | AM+K_not_in_group |
| Medtr4g077470 ransmembrane protein, putative      | AM+K_not_in_group |
| Medtr4g077475 itin carboxyl-terminal hydrolase    | AM+K_not_in_group |
| Medtr5g036290 matrixin family protein             | AM+K_not_in_group |
| Medtr5g068910 hypothetical protein                | AM+K_not_in_group |
| Medtr6g486230 ransmembrane protein, putative      | AM+K_not_in_group |
| Medtr7g060220 DUF247 domain protein               | AM+K_not_in_group |
| Medtr7g067800 hypothetical protein                | AM+K_not_in_group |
| Medtr7g077220 Bowman birk trypsin inhibitor       | AM+K_not_in_group |
| Medtr8g009160 carboxylate oxidase-like protein    | AM+K_not_in_group |
| Medtr8g041770 e acyl-transferase family protein   | AM+K_not_in_group |
| Medtr2g017440 secreted protein                    | AM+K_not_in_group |
| Medtr4g059870 2HC zinc finger protein, putative   | AM+K_not_in_group |
| Medtr4g073100 BZIP transcription factor           | AM+K_not_in_group |
| Medtr5g075630 receptor-like kinase                | AM+K_not_in_group |
| Medtr4g084630 termination factor family protein   | AM+K_not_in_group |
| Medtr1g090290 ethylene response factor            | AM+K_not_in_group |
| Medtr3g099180 ear transcription factor Y protein  | AM+K_not_in_group |
| Medtr6g086560 on protein rsbq protein, putative   | AM+K_not_in_group |
| Medtr2g450220 phoesterase superfamily protein     | AM+K_not_in_group |
| Medtr4g049340 protein (MIP) family transporter    | AM+K_not_in_group |
| Medtr6g029180 domain class transcription factor   | AM+K_not_in_group |
| Medtr1g093720 nthocyanidin reductase LAR1-2       | AM+K_not_in_group |
| Medtr1g097170 hypothetical protein                | AM+K_not_in_group |
| Medtr2g102060 nall GTPase family RAB protein      | AM+K_not_in_group |
| Medtr3g436540 flavonoid hydroxylase               | AM+K_not_in_group |
| Medtr5g087970 plastocyanin-like domain protein    | AM+K_not_in_group |
| Medtr6g013170 plastocyanin-like domain protein    | AM+K_not_in_group |
| Medtr6g014310 ucosyltransferase family protein    | AM+K_not_in_group |
| Medtr8g024380 subtilisin-like serine protease     | AM+K_not_in_group |
| Medtr5g026720 3HC4 type (RING finger) protein     | AM+K_not_in_group |
| Medtr2g481160 ound-responsive family protein      | AM+K_not_in_group |
| Medtr3g072710 rotKB/Swiss-Prot;Acc:Q5NE24]        | AM+K_not_in_group |
| Medtr2g078240 alcium-binding EF-hand protein      | AM+K_not_in_group |
| Medtr5g015370 osylation factor-like protein A1D   | AM+K_not_in_group |
| Medtr7g105630 programmed cell death protein       | AM+K_not_in_group |
| Medtr2g022710 oside hydrolase family 1 protein    | AM+K_not_in_group |
| Medtr6g013300 roteasome subunit beta protein      | AM+K_not_in_group |
| Medtr3g099750 purine permease-like protein        | AM+K_not_in_group |
| Medtr7g063490 legume-specific protein             | AM+K_not_in_group |
| Medtr1g059970 , amino-terminal domain protein     | AM+K_not_in_group |
| Medtr2g101640 peptide/nitrate transporter plant   | AM+K_not_in_group |
| Medtr5g009000 hexokinase                          | AM+K_not_in_group |
| Medtr8g090350 ethylene response factor            | AM+K_not_in_group |
| Medtr0036s0050 aspartyl protease family protein   | AM+K_not_in_group |
| Medtr8g104210 hypothetical protein                | AM+K_not_in_group |
| Medtr2g087780 tosidine synthase family protein    | AM+K_not_in_group |
| Medtr3g433530 R) secreted peptide-like protein    | AM+K_not_in_group |
| Medtr4g029040 saposin B domain protein            | AM+K_not_in_group |
| Medtr5g005820 )-like cupins superfamily protein   | AM+K_not_in_group |

diffusion\_prioritization\_ALL

|                |                                      |                   |
|----------------|--------------------------------------|-------------------|
| Medtr7g059435  | LCR-like protein                     | AM+K_not_in_group |
| Medtr4g093030  | ranscription factor family protein   | AM+K_not_in_group |
| Medtr7g058970  | hypothetical protein                 | AM+K_not_in_group |
| Medtr8g066900  | hypothetical protein                 | AM+K_not_in_group |
| Medtr3g065300  | osome condensation-like protein      | AM+K_not_in_group |
| Medtr6g465510  | ponsive element-binding protein      | AM+K_not_in_group |
| Medtr4g092080  | nthocyanidin reductase ANR1-1        | AM+K_not_in_group |
| Medtr6g009650  | psin inhibitor / Alpha-fucosidase    | AM+K_not_in_group |
| Medtr7g016600  | MADS-box transcription factor        | AM+K_not_in_group |
| Medtr7g073170  | Lipid transfer protein               | AM+K_not_in_group |
| Medtr8g097090  | MADS-box transcription factor        | AM+K_not_in_group |
| Medtr6g012810  | /Threonine kinase family protein     | AM+K_not_in_group |
| Medtr2g016770  | NRKY family transcription factor     | AM+K_not_in_group |
| Medtr2g435550  | tic/protein phosphatase type 2C      | AM+K_not_in_group |
| Medtr4g090545  | hypothetical protein                 | AM+K_not_in_group |
| Medtr5g012810  | protein (MIP) family transporter     | AM+K_not_in_group |
| Medtr5g028070  | NBS-LRR resistance protein           | AM+K_not_in_group |
| Medtr7g076900  | g (CaLB domain) family protein       | AM+K_not_in_group |
| Medtr1g076830  | -binding berberine family protein    | AM+K_not_in_group |
| Medtr8g095370  | Defensin MtDef4.6                    | AM+K_not_in_group |
| Medtr4g087510  | O-acetylserine (thiol) lyase         | AM+K_not_in_group |
| Medtr5g022400  | ismembrane MLO family protein        | AM+K_not_in_group |
| Medtr8g091450  | ase-interactive protein, putative    | AM+K_not_in_group |
| Medtr6g007490  | G protein coupled receptor           | AM+K_not_in_group |
| Medtr5g018320  | methyl jasmonate esterase            | AM+K_not_in_group |
| Medtr3g008410  | ubiquitin family protein             | AM+K_not_in_group |
| Medtr5g063670  | annexin D8                           | AM+K_not_in_group |
| Medtr7g084970  | flowering locus protein T            | AM+K_not_in_group |
| Medtr2g041090  | AAT-binding transcription factor     | AM+K_not_in_group |
| Medtr3g460760  | hypothetical protein                 | AM+K_not_in_group |
| Medtr2g034250  | GRAS family transcription factor     | AM+K_not_in_group |
| Medtr7g105080  | OS ribosomal L40 fusion protein      | AM+K_not_in_group |
| Medtr1g106420  | LOB domain protein                   | AM+K_in_group     |
| Medtr5g087490  | actor biosynthesis protein CNX1      | AM+K_not_in_group |
| Medtr6g036620  | Leginsulin/Albumin-1                 | AM+K_not_in_group |
| Medtr8g018510  | seed linoleate 9S-lipoxygenase       | AM+K_in_group     |
| Medtr8g077850  | receptor-like kinase                 | AM+K_not_in_group |
| Medtr8g088600  | olactate synthase, small subunit     | AM+K_not_in_group |
| Medtr4g127670  | class III peroxidase                 | AM+K_not_in_group |
| Medtr7g113510  | cyclin family protein, putative      | AM+K_not_in_group |
| Medtr8g088840  | kinetochore Nuf2-like protein        | AM+K_not_in_group |
| Medtr4g068970  | rase/dehydratase family protein      | AM+K_not_in_group |
| Medtr6g018270  | seed specific protein Bn15D17A       | AM+K_not_in_group |
| Medtr5g015600  | -2 complex subunit G2, putative      | AM+K_not_in_group |
| Medtr4g127360  | ation inhibition factor-like protein | AM+K_not_in_group |
| Medtr0001s0490 | growth-regulating factor             | AM+K_not_in_group |
| Medtr8g465340  | LRR receptor-like kinase             | AM+K_not_in_group |
| Medtr1g088410  | 'rotKB/Swiss-Prot;Acc:Q9SC88]        | AM+K_not_in_group |
| Medtr2g024100  | rotein interaction domain protein    | AM+K_not_in_group |
| Medtr4g095440  | hypothetical protein                 | AM+K_not_in_group |
| Medtr4g109290  | galactose oxidase                    | AM+K_not_in_group |

diffusion\_prioritization\_ALL

|               |                                     |                   |
|---------------|-------------------------------------|-------------------|
| Medtr5g032790 | hypothetical protein                | AM+K_not_in_group |
| Medtr6g059680 | psin inhibitor / Alpha-fucosidase   | AM+K_not_in_group |
| Medtr7g077210 | Bowman birk trypsin inhibitor       | AM+K_not_in_group |
| Medtr3g077000 | GRAM domain plant-like protein      | AM+K_not_in_group |
| Medtr2g031270 | rhicadhesin receptor                | AM+K_not_in_group |
| Medtr4g035490 | alactosyltransferase-like protein   | AM+K_not_in_group |
| Medtr7g111860 | ding protein of 41 kDa protein B    | AM+K_not_in_group |
| Medtr5g005170 | ceptor-like kinase family protein   | AM+K_not_in_group |
| Medtr5g035010 | dehydrase and lipid transporter     | AM+K_not_in_group |
| Medtr7g092540 | tion factor bHLH122-like protein    | AM+K_not_in_group |
| Medtr8g069775 | gh affinity nitrate transporter 2.7 | AM+K_not_in_group |
| Medtr6g083830 | core-2/I-branching enzyme           | AM+K_not_in_group |
| Medtr6g488030 | bark storage-like protein           | AM+K_not_in_group |
| Medtr8g074760 | hypothetical protein                | AM+K_not_in_group |
| Medtr1g004990 | casein kinase                       | AM+K_not_in_group |
| Medtr4g080340 | DUF1685 family protein              | AM+K_not_in_group |
| Medtr5g036330 | of chromosomes family protein       | AM+K_not_in_group |
| Medtr5g055310 | associated kinase family protein    | AM+K_not_in_group |
| Medtr4g091570 | tor-like Serine/Threonine-kinase    | AM+K_not_in_group |
| Medtr4g083780 | zinc finger ZPR1-like protein       | AM+K_not_in_group |
| Medtr7g104725 | hypothetical protein                | AM+K_not_in_group |
| Medtr1g096530 | 347270) TAIR;Acc:AT2G47270]         | AM+K_not_in_group |
| Medtr5g080440 | leghemoglobin Lb120-1               | AM+K_not_in_group |
| Medtr5g075400 | hypothetical protein                | AM+K_not_in_group |
| Medtr4g113820 | early nodulin 93                    | AM+K_not_in_group |
| Medtr1g007150 | casein kinase I-like protein        | AM+K_not_in_group |
| Medtr3g462330 | 1/RBD/RNP motif) family protein     | AM+K_not_in_group |
| Medtr1g007670 | ltransferase ATXR6-like protein     | AM+K_not_in_group |
| Medtr1g009890 | ein A 32 kDa subunit-like protein   | AM+K_not_in_group |
| Medtr1g022405 | carbonic anhydrase-like protein     | AM+K_not_in_group |
| Medtr1g046380 | ie oxidoreductase B16.6 subunit     | AM+K_not_in_group |
| Medtr1g099370 | carboxy-terminal region protein     | AM+K_not_in_group |
| Medtr1g101130 | tubulin beta-1 chain                | AM+K_not_in_group |
| Medtr2g028550 | kinetochore NDC80-like protein      | AM+K_not_in_group |
| Medtr2g039510 | pase/thioesterase family protein    | AM+K_not_in_group |
| Medtr2g096610 | 'rotKB/Swiss-Prot;Acc:Q2HU68]       | AM+K_not_in_group |
| Medtr3g063110 | iphosphate nucleotidohydrolase      | AM+K_not_in_group |
| Medtr3g072410 | M domain GPI-anchored protein       | AM+K_not_in_group |
| Medtr3g083230 | thymidine kinase-like protein       | AM+K_not_in_group |
| Medtr3g102530 | carboxy-terminal domain cyclin      | AM+K_not_in_group |
| Medtr4g071090 | ance (MCM2/3/5) family protein      | AM+K_not_in_group |
| Medtr4g073650 | ptidyl-prolyl cis-trans isomerase   | AM+K_not_in_group |
| Medtr4g074350 | 24)-sterol reductase-like protein   | AM+K_not_in_group |
| Medtr4g077000 | DUF3411 domain protein              | AM+K_not_in_group |
| Medtr4g087240 | oamine-oxidase A repressor R1       | AM+K_not_in_group |
| Medtr4g088150 | core histone H2A/H2B/H3/H4          | AM+K_not_in_group |
| Medtr4g099140 | utative plant SNARE-like protein    | AM+K_not_in_group |
| Medtr4g109490 | drate-binding X8 domain protein     | AM+K_not_in_group |
| Medtr4g109580 | lication protein A 70 kDa protein   | AM+K_not_in_group |
| Medtr4g117470 | ribosomal protein S8                | AM+K_not_in_group |
| Medtr5g015850 | 39S ribosomal protein L47           | AM+K_not_in_group |

diffusion\_prioritization\_ALL

|               |                                     |                   |
|---------------|-------------------------------------|-------------------|
| Medtr5g034340 | hypothetical protein                | AM+K_not_in_group |
| Medtr5g096540 | 60S ribosomal protein L26-1         | AM+K_not_in_group |
| Medtr7g099960 | rotKB/Swiss-Prot;Acc:Q1SU99]        | AM+K_not_in_group |
| Medtr7g109480 | licensing factor Mcm7, putative     | AM+K_not_in_group |
| Medtr8g028450 | seed maturation protein             | AM+K_not_in_group |
| Medtr8g063500 | core histone H2A/H2B/H3/H4          | AM+K_not_in_group |
| Medtr8g075140 | defective 3006 protein, putative    | AM+K_not_in_group |
| Medtr8g092040 | ATP synthase                        | AM+K_not_in_group |
| Medtr8g099945 | ock cognate 70 kDa-like protein     | AM+K_not_in_group |
| Medtr8g103245 | core histone H2A/H2B/H3/H4          | AM+K_not_in_group |
| Medtr8g107140 | -related thaumatin family protein   | AM+K_not_in_group |
| Medtr8g005720 | hreonine kinase domain protein      | AM+K_not_in_group |
| Medtr4g063950 | receptor-like kinase                | AM+K_not_in_group |
| Medtr3g016290 | ransmembrane protein, putative      | AM+K_not_in_group |
| Medtr4g045990 | wound-responsive family protein     | AM+K_not_in_group |
| Medtr6g092620 | opropane-1-carboxylate oxidase      | AM+K_not_in_group |
| Medtr7g023690 | ylgalacturonase inhibitor protein   | AM+K_not_in_group |
| Medtr4g010650 | phospholipase D alpha 1             | AM+K_not_in_group |
| Medtr5g074600 | orcinol O-methyltransferase         | AM+K_not_in_group |
| Medtr3g118070 | semialdehyde 2,1-aminomutase        | AM+K_not_in_group |
| Medtr2g093840 | carboxyl-terminal peptidase         | AM+K_not_in_group |
| Medtr1g093600 | d B3 domain transcription factor    | AM+K_not_in_group |
| Medtr1g022160 | l,3-beta-glucosidase-like protein   | AM+K_not_in_group |
| Medtr2g030130 | eodomain leucine zipper protein     | AM+K_not_in_group |
| Medtr3g078010 | ASP ARALYDRAFT-like protein         | AM+K_not_in_group |
| Medtr5g089720 | rg (CaLB domain) family protein     | AM+K_not_in_group |
| Medtr7g067080 | MYB transcription factor MYB51      | AM+K_not_in_group |
| Medtr2g086500 | l protein L1p/L10e family protein   | AM+K_not_in_group |
| Medtr7g105810 | TB2/DP1, HVA22 family protein       | AM+K_not_in_group |
| Medtr8g012960 | icting protein 4 transcript protein | AM+K_not_in_group |
| Medtr5g048050 | Avr9/Cf-9 rapidly elicited protein  | AM+K_in_group     |
| Medtr7g089950 | osphate 5-kinase family protein     | AM+K_not_in_group |
| Medtr2g048360 | DUF630 family protein               | AM+K_not_in_group |
| Medtr2g079490 | holine transporter family protein   | AM+K_not_in_group |
| Medtr7g096520 | ose) polymerase domain protein      | AM+K_not_in_group |
| Medtr8g105260 | ankyrin repeat plant-like protein   | AM+K_not_in_group |
| Medtr2g018135 | subtilisin-like serine protease     | AM+K_not_in_group |
| Medtr2g089835 | wound-responsive family protein     | AM+K_not_in_group |
| Medtr4g076470 | uncan endo-1,3-beta-glucosidase     | AM+K_not_in_group |
| Medtr1g079540 | GDSL-like lipase/acylhydrolase      | AM+K_not_in_group |
| Medtr8g027985 | ubiquitin ligase cop1, putative     | AM+K_not_in_group |
| Medtr3g027940 | ir/toleration DRT100-like protein   | AM+K_not_in_group |
| Medtr3g098390 | hypothetical protein                | AM+K_not_in_group |
| Medtr7g012260 | ted ion channel protein, putative   | AM+K_not_in_group |
| Medtr4g072330 | auxin-responsive family protein     | AM+K_not_in_group |
| Medtr1g102230 | alpha-L-fucosidase-like protein     | AM+K_not_in_group |
| Medtr1g108840 | MATE efflux family protein          | AM+K_not_in_group |
| Medtr3g008580 | opper oxidase SKS1-like protein     | AM+K_not_in_group |
| Medtr3g086120 | LRR receptor-like kinase            | AM+K_not_in_group |
| Medtr7g090740 | defective 1 protein/ELD1 protein    | AM+K_not_in_group |
| Medtr3g437990 | ABC transporter A family protein    | AM+K_not_in_group |



## diffusion\_prioritization\_ALL

|                                                   |                   |
|---------------------------------------------------|-------------------|
| Medtr7g114870 calmodulin-binding motif protein    | AM+K_not_in_group |
| Medtr2g091190 tion factor bHLH107-like protein    | AM+K_not_in_group |
| Medtr3g109820 LRR receptor-like kinase            | AM+K_in_group     |
| Medtr8g105230 id calcium-binding family protein   | AM+K_not_in_group |
| Medtr2g090615 namine family aminotransferase      | AM+K_not_in_group |
| Medtr1g038810 .5-trisphosphate 5-phosphatase      | AM+K_not_in_group |
| Medtr3g046670 te hydrolase superfamily protein    | AM+K_not_in_group |
| Medtr5g094520 ochrome P450 family 71 protein      | AM+K_not_in_group |
| Medtr4g124660 sucrose synthase                    | AM+K_not_in_group |
| Medtr4g061130 MAP kinase I                        | AM+K_not_in_group |
| Medtr0102s0060 -3-acetic acid-amido synthetase    | AM+K_not_in_group |
| Medtr5g021610 lyase/glyoxalase I family protein   | AM+K_not_in_group |
| Medtr4g063100 myb transcription factor            | AM+K_not_in_group |
| Medtr1g014190 ein phosphatase 2C-like protein     | AM+K_not_in_group |
| Medtr1g030840 :dehydrase and lipid transporter    | AM+K_not_in_group |
| Medtr1g085190 hypothetical protein                | AM+K_not_in_group |
| Medtr1g115510 ce response/dirigent-like protein   | AM+K_not_in_group |
| Medtr2g101370 protein (MIP) family transporter    | AM+K_not_in_group |
| Medtr2g461190 stress induced protein              | AM+K_not_in_group |
| Medtr3g028550 ransmembrane protein, putative      | AM+K_not_in_group |
| Medtr4g062470 ponsive, dirigent domain protein    | AM+K_not_in_group |
| Medtr5g041010 ribonuclease T2 family protein      | AM+K_not_in_group |
| Medtr6g090060 DUF1005 family protein              | AM+K_not_in_group |
| Medtr7g084750 osylase/hydrolase family protein    | AM+K_not_in_group |
| Medtr7g103050 hypothetical protein                | AM+K_not_in_group |
| Medtr8g075920 bberellin-regulated family protein  | AM+K_not_in_group |
| Medtr7g081815 P2-domain DNA-binding protein       | AM+K_not_in_group |
| Medtr5g014250 imily ent-kaurenoic acid oxidase    | AM+K_not_in_group |
| Medtr2g100030 /Threonine kinase family protein    | AM+K_not_in_group |
| Medtr3g107630 acyl thioesterase-like protein      | AM+K_not_in_group |
| Medtr1g026910 :porter TauE/SafE family protein    | AM+K_not_in_group |
| Medtr4g088415 cytochrome P450 family protein      | AM+K_not_in_group |
| Medtr1g098820 hypothetical protein                | AM+K_not_in_group |
| Medtr3g435370 thioredoxin                         | AM+K_not_in_group |
| Medtr4g127870 sphate carboxylase small chain      | AM+K_not_in_group |
| Medtr1g107500 :ceptor-like kinase family protein  | AM+K_not_in_group |
| Medtr8g012400 :osyl hydrolase family 17 protein   | AM+K_not_in_group |
| Medtr7g056147 icting protein 4 transcript protein | AM+K_not_in_group |
| Medtr7g029345 ) chloride channel family protein   | AM+K_not_in_group |
| Medtr4g068000 egulator RWP-RK family protein      | AM+K_not_in_group |
| Medtr6g015795 nding protein of the ER protein     | AM+K_not_in_group |
| Medtr4g021380 gibberellin 2-beta-dioxygenase      | AM+K_not_in_group |
| Medtr2g006200 papain family cysteine protease     | AM+K_not_in_group |
| Medtr3g063950 ransmembrane protein, putative      | AM+K_not_in_group |
| Medtr3g106620 Kunitz type trypsin inhibitor       | AM+K_not_in_group |
| Medtr5g030500 acid receptor PYR1-like protein     | AM+K_not_in_group |
| Medtr7g113960 rter (SP) family MFS transporter    | AM+K_not_in_group |
| Medtr4g086540 lpha/beta hydrolase fold protein    | AM+K_not_in_group |
| Medtr3g110720 tubulin beta-1 chain                | AM+K_not_in_group |
| Medtr3g111600 / family GT8 glycosyltransferase    | AM+K_not_in_group |
| Medtr7g085410 ranscription factor family protein  | AM+K_not_in_group |

## diffusion\_prioritization\_ALL

|                |                                    |                   |
|----------------|------------------------------------|-------------------|
| Medtr8g085980  | tubulin beta-1 chain               | AM+K_not_in_group |
| Medtr8g091660  | ite aminotransferase-like protein  | AM+K_not_in_group |
| Medtr7g103030  | ProtKB/Swiss-Prot;Acc:Q9FY14]      | AM+K_not_in_group |
| Medtr1g021110  | )-NBS-LRR class) family protein    | AM+K_not_in_group |
| Medtr2g098340  | hypothetical protein               | AM+K_not_in_group |
| Medtr6g049050  | F-box protein                      | AM+K_not_in_group |
| Medtr4g093780  | ransmembrane protein, putative     | AM+K_not_in_group |
| Medtr2g075010  | LRR receptor-like kinase           | AM+K_not_in_group |
| Medtr7g034535  | beta-amyryn synthase               | AM+K_not_in_group |
| Medtr1g099110  | ke tyrosine kinase family protein  | AM+K_not_in_group |
| Medtr1g094215  | idillo/beta-catenin repeat protein | AM+K_not_in_group |
| Medtr4g091370  | rter (SP) family MFS transporter   | AM+K_not_in_group |
| Medtr4g094908  | NRKY family transcription factor   | AM+K_not_in_group |
| Medtr8g076220  | ransmembrane protein, putative     | AM+K_not_in_group |
| Medtr8g077830  | porter TauE/SafE family protein    | AM+K_not_in_group |
| Medtr3g054230  | hypothetical protein               | AM+K_not_in_group |
| Medtr8g041690  | ysteine-rich receptor-like kinase  | AM+K_not_in_group |
| Medtr1g013360  | stidine kinase cytokinin receptor  | AM+K_not_in_group |
| Medtr2g035170  | ase-resistance response protein    | AM+K_not_in_group |
| Medtr4g019780  | , amino-terminal domain protein    | AM+K_not_in_group |
| Medtr4g070430  | enylyltransferase family protein   | AM+K_not_in_group |
| Medtr7g015130  | eracting factor-like phosphatase   | AM+K_not_in_group |
| Medtr7g029275  | cytochrome P450 family protein     | AM+K_not_in_group |
| Medtr4g113620  | TP-binding nuclear protein Ran1    | AM+K_not_in_group |
| Medtr7g088200  | inase substrate protein, putative  | AM+K_not_in_group |
| Medtr7g112650  | hypothetical protein               | AM+K_not_in_group |
| Medtr3g072170  | ypoxia-responsive family protein   | AM+K_not_in_group |
| Medtr3g056160  | n CCCH-type zinc finger protein    | AM+K_not_in_group |
| Medtr1g015890  | lutaredoxin-like protein, putative | AM+K_not_in_group |
| Medtr3g118500  | hypothetical protein               | AM+K_not_in_group |
| Medtr4g075100  | . Clp protease proteolytic protein | AM+K_not_in_group |
| Medtr8g086520  | scorbate transporter-like protein  | AM+K_not_in_group |
| Medtr2g079050  | oglycan-binding domain protein     | AM+K_not_in_group |
| Medtr3g098910  | or intercellular exchange protein  | AM+K_not_in_group |
| Medtr4g073520  | o acid transporter family protein  | AM+K_not_in_group |
| Medtr7g093140  | mbryogenesis abundant protein      | AM+K_not_in_group |
| Medtr8g463180  | plastocyanin-like domain protein   | AM+K_not_in_group |
| Medtr0807s0020 | albumin-2 protein                  | AM+K_not_in_group |
| Medtr1g016620  | ein phosphatase 2C-like protein    | AM+K_not_in_group |
| Medtr1g033130  | ollen protein Ole E I-like protein | AM+K_not_in_group |
| Medtr1g056350  | bunit 11 RING-H2 finger protein    | AM+K_not_in_group |
| Medtr1g090873  | SEC12p-like protein                | AM+K_not_in_group |
| Medtr2g029740  | peroxidase family protein          | AM+K_not_in_group |
| Medtr2g084230  | g domain, shaqkyf class protein    | AM+K_not_in_group |
| Medtr4g101025  | hypothetical protein               | AM+K_not_in_group |
| Medtr5g090920  | , amino-terminal domain protein    | AM+K_not_in_group |
| Medtr7g005940  | ubox-like protein, putative        | AM+K_not_in_group |
| Medtr7g067950  | hypothetical protein               | AM+K_not_in_group |
| Medtr8g008660  | alpha/beta fold hydrolase          | AM+K_in_group     |
| Medtr8g017410  | cell-wall invertase                | AM+K_not_in_group |
| Medtr2g084245  | lucuronosyltransferase, putative   | AM+K_not_in_group |

## diffusion\_prioritization\_ALL

|               |                                      |                   |
|---------------|--------------------------------------|-------------------|
| Medtr7g013610 | core histone H2A/H2B/H3/H4           | AM+K_not_in_group |
| Medtr4g106540 | cription factor-E2FE-like protein    | AM+K_not_in_group |
| Medtr2g097463 | GRAS family transcription factor     | AM+K_not_in_group |
| Medtr3g089510 | MAP kinase-like protein              | AM+K_not_in_group |
| Medtr4g072310 | auxin-responsive family protein      | AM+K_not_in_group |
| Medtr8g037933 | ransmembrane protein, putative       | AM+K_not_in_group |
| Medtr4g062330 | yst subunit exo70 family protein     | AM+K_not_in_group |
| Medtr6g083760 | receptor-like kinase                 | AM+K_not_in_group |
| Medtr1g071920 | it shock 22 kDa protein, putative    | AM+K_not_in_group |
| Medtr2g008970 | e (caspase) p20 domain protein       | AM+K_not_in_group |
| Medtr7g024670 | Dof domain zinc finger protein       | AM+K_not_in_group |
| Medtr7g100450 | copper chaperone                     | AM+K_not_in_group |
| Medtr8g101260 | LRR receptor-like kinase             | AM+K_not_in_group |
| Medtr2g085210 | ubiquitin ligase cop1, putative      | AM+K_not_in_group |
| Medtr1g073740 | β-glucosyl synthase-like protein D3  | AM+K_not_in_group |
| Medtr2g013440 | rubber elongation factor protein     | AM+K_not_in_group |
| Medtr2g014680 | transcription factor-like protein    | AM+K_not_in_group |
| Medtr3g005520 | in initiation factor 1A-like protein | AM+K_not_in_group |
| Medtr3g103410 | plant/MWF20 protein                  | AM+K_not_in_group |
| Medtr3g111150 | serpin-like protein                  | AM+K_not_in_group |
| Medtr4g014810 | ngation factor Tu family protein     | AM+K_not_in_group |
| Medtr4g124040 | ABC transporter B family protein     | AM+K_not_in_group |
| Medtr5g062660 | nudix hydrolase-like protein         | AM+K_not_in_group |
| Medtr5g097030 | small nuclear ribonucleoprotein      | AM+K_not_in_group |
| Medtr6g009720 | te hydrolase superfamily protein     | AM+K_in_group     |
| Medtr8g027160 | oe calcium-transporting ATPase       | AM+K_not_in_group |
| Medtr8g042060 | ochrome P450 family 72 protein       | AM+K_not_in_group |
| Medtr8g083290 | flavonoid glucosyltransferase        | AM+K_not_in_group |
| Medtr5g045190 | /Threonine kinase family protein     | AM+K_not_in_group |
| Medtr1g076430 | oacyl-CoA synthase-like protein      | AM+K_not_in_group |
| Medtr1g069470 | ceptor-like kinase family protein    | AM+K_not_in_group |
| Medtr4g094730 | M domain GPI-anchored protein        | AM+K_not_in_group |
| Medtr5g026640 | isolute symporter family protein     | AM+K_not_in_group |
| Medtr1g018760 | partyl peptidase/L-asparaginase      | AM+K_not_in_group |
| Medtr1g109380 | icid permease BAT1-like protein      | AM+K_not_in_group |
| Medtr1g109600 | ransmembrane protein, putative       | AM+K_not_in_group |
| Medtr2g013680 | ransmembrane protein, putative       | AM+K_not_in_group |
| Medtr2g035405 | allantoate amidohydrolase            | AM+K_not_in_group |
| Medtr2g437380 | xygenase family oxidoreductase       | AM+K_not_in_group |
| Medtr3g087940 | BZIP family transcription factor     | AM+K_not_in_group |
| Medtr4g104140 | B/POZ and TAZ domain protein         | AM+K_not_in_group |
| Medtr5g026320 | e acyl-transferase family protein    | AM+K_not_in_group |
| Medtr3g110175 | bark storage-like protein            | AM+K_not_in_group |
| Medtr8g016480 | s β-LRR class) (other strand read)   | AM+K_not_in_group |
| Medtr1g013760 | NRKY family transcription factor     | AM+K_not_in_group |
| Medtr1g110930 | oacyl-CoA synthase-like protein      | AM+K_not_in_group |
| Medtr1g053255 | RRP12-like protein                   | AM+K_not_in_group |
| Medtr5g095220 | ochrome P450 family 71 protein       | AM+K_not_in_group |
| Medtr3g073180 | e reductase [NADH]-like protein      | AM+K_in_group     |
| Medtr1g099520 | integral membrane protein            | AM+K_not_in_group |
| Medtr7g086430 | M50 family peptidase                 | AM+K_not_in_group |

## diffusion\_prioritization\_ALL

|               |                                    |                   |
|---------------|------------------------------------|-------------------|
| Medtr7g116320 | notif DNA-binding family protein   | AM+K_not_in_group |
| Medtr1g019130 | isochel-related homeobox protein   | AM+K_not_in_group |
| Medtr2g018690 | auxin response factor 2            | AM+K_not_in_group |
| Medtr2g075400 | brassinazole-resistant 1 protein   | AM+K_not_in_group |
| Medtr3g464150 | te hydrolase superfamily protein   | AM+K_not_in_group |
| Medtr6g061710 | chome birefringence-like protein   | AM+K_not_in_group |
| Medtr5g030010 | RING-H2 zinc finger protein        | AM+K_not_in_group |
| Medtr3g100650 | ox domain, ZF-HD class protein     | AM+K_not_in_group |
| Medtr1g112370 | ig domain, shaqkyf class protein   | AM+K_not_in_group |
| Medtr2g020860 | ase/phosphatase family protein     | AM+K_not_in_group |
| Medtr3g072000 | netal-associated domain protein    | AM+K_not_in_group |
| Medtr4g059730 | , amino-terminal domain protein    | AM+K_not_in_group |
| Medtr5g024340 | -dependent kinase phosphatase      | AM+K_not_in_group |
| Medtr1g084200 | plant/F25P12-18 protein            | AM+K_not_in_group |
| Medtr1g094130 | hypothetical protein               | AM+K_not_in_group |
| Medtr2g426070 | rotein interaction domain protein  | AM+K_not_in_group |
| Medtr3g026400 | oside hydrolase family 1 protein   | AM+K_not_in_group |
| Medtr3g079210 | Lipid transfer protein             | AM+K_not_in_group |
| Medtr3g105550 | oacyl-CoA synthase-like protein    | AM+K_not_in_group |
| Medtr5g033800 | -like acyl-esterase family protein | AM+K_not_in_group |
| Medtr5g076480 | ASP POPTRDRAFT-like protein        | AM+K_not_in_group |
| Medtr6g045553 | alcohol acyltransferase            | AM+K_not_in_group |
| Medtr7g006540 | peptide transporter                | AM+K_not_in_group |
| Medtr7g033080 | hypothetical protein               | AM+K_not_in_group |
| Medtr7g068380 | uolar cation/proton exchanger 3    | AM+K_not_in_group |
| Medtr7g111900 | plant/F25P12-18 protein            | AM+K_not_in_group |
| Medtr7g114100 | cid-binding copine family protein  | AM+K_not_in_group |
| Medtr3g090480 | LRR receptor-like kinase           | AM+K_not_in_group |
| Medtr3g107830 | on-responsive RD22-like protein    | AM+K_not_in_group |
| Medtr6g036650 | ucosyltransferase family protein   | AM+K_not_in_group |
| Medtr5g021500 | inc finger CCCH domain protein     | AM+K_not_in_group |
| Medtr7g074010 | LRR receptor-like kinase           | AM+K_not_in_group |
| Medtr5g026620 | ubiquinol oxidase 1a               | AM+K_not_in_group |
| Medtr4g014610 | ucible lysosomal thiol reductase   | AM+K_not_in_group |
| Medtr7g006450 | leucyl-tRNA synthetase             | AM+K_not_in_group |
| Medtr7g052820 | alponin-like (CH) domain protein   | AM+K_not_in_group |
| Medtr4g093850 | -responsive NPH3 family protein    | AM+K_not_in_group |
| Medtr2g059890 | hosphatase superfamily protein     | AM+K_not_in_group |
| Medtr6g016495 | iP-interacting kinase-like protein | AM+K_not_in_group |
| Medtr3g099490 | hypothetical protein               | AM+K_not_in_group |
| Medtr6g023990 | chain dehydrogenase/reductase      | AM+K_not_in_group |
| Medtr5g037500 | main disease resistance protein    | AM+K_not_in_group |
| Medtr2g062470 | BAH domain protein                 | AM+K_not_in_group |
| Medtr3g118030 | 60S ribosomal protein L5-2         | AM+K_not_in_group |
| Medtr5g082480 | ATP-binding protein, putative      | AM+K_not_in_group |
| Medtr7g082180 | hypothetical protein               | AM+K_not_in_group |
| Medtr2g005880 | lyase/glyoxalase I family protein  | AM+K_not_in_group |
| Medtr2g008240 | arabinofuranosidase-like protein   | AM+K_not_in_group |
| Medtr2g013980 | lomerase activating protein Est1   | AM+K_not_in_group |
| Medtr2g016760 | DUF1685 family protein             | AM+K_not_in_group |
| Medtr2g084275 | auxin-regulated protein            | AM+K_not_in_group |

diffusion\_prioritization\_ALL

|               |                                    |                   |
|---------------|------------------------------------|-------------------|
| Medtr2g086890 | hypothetical protein               | AM+K_not_in_group |
| Medtr2g087610 | core-2/l-branching enzyme          | AM+K_not_in_group |
| Medtr3g008170 | rter (SP) family MFS transporter   | AM+K_not_in_group |
| Medtr3g047380 | osphate synthase family protein    | AM+K_not_in_group |
| Medtr3g102760 | id 5-beta-reductase-like protein   | AM+K_not_in_group |
| Medtr4g044663 | Threonine kinase family protein    | AM+K_not_in_group |
| Medtr4g091550 | PLAC8 family protein               | AM+K_not_in_group |
| Medtr5g025330 | αA-like transporter family protein | AM+K_not_in_group |
| Medtr6g088450 | l/monosaccharide transporter 1     | AM+K_in_group     |
| Medtr8g036130 | ranscription factor family protein | AM+K_not_in_group |
| Medtr8g077310 | rter (SP) family MFS transporter   | AM+K_not_in_group |
| Medtr8g092290 | cyclin-dependent kinase            | AM+K_not_in_group |
| Medtr6g013150 | ranscription factor 11-2, putative | AM+K_not_in_group |
| Medtr8g107470 | LRR receptor-like kinase           | AM+K_not_in_group |
| Medtr7g073120 | Lipid transfer protein             | AM+K_not_in_group |
| Medtr8g041940 | osin group486 secreted peptide     | AM+K_not_in_group |
| Medtr7g092750 | BZIP family transcription factor   | AM+K_not_in_group |
| Medtr1g059900 | sic anhydrase (other strand read)  | AM+K_not_in_group |
| Medtr7g405740 | auxin-responsive family protein    | AM+K_not_in_group |
| Medtr7g056663 | tor-like Serine/Threonine-kinase   | AM+K_not_in_group |
| Medtr5g095230 | ochrome P450 family 72 protein     | AM+K_not_in_group |
| Medtr8g091420 | etoxification superfamily protein  | AM+K_not_in_group |
| Medtr5g098970 | LRR receptor-like kinase           | AM+K_not_in_group |
| Medtr7g094680 | small nuclear ribonucleoprotein    | AM+K_not_in_group |
| Medtr1g028920 | VQ motif protein                   | AM+K_not_in_group |
| Medtr1g090667 | g oxidoreductase family protein    | AM+K_not_in_group |
| Medtr2g036320 | UPF0481 plant-like protein         | AM+K_not_in_group |
| Medtr4g017030 | germin family protein              | AM+K_not_in_group |
| Medtr8g006190 | 'POZ and MATH domain protein       | AM+K_not_in_group |
| Medtr7g015280 | r-like kinase feronia-like protein | AM+K_not_in_group |
| Medtr5g084540 | osin group485 secreted peptide     | AM+K_not_in_group |
| Medtr5g019680 | omeobox leucine zipper protein     | AM+K_not_in_group |
| Medtr4g011530 | .responsive NPH3 family protein    | AM+K_not_in_group |
| Medtr1g007370 | RNA polymerase sigma factor        | AM+K_not_in_group |
| Medtr1g016360 | DUF1230 family protein             | AM+K_not_in_group |
| Medtr1g019970 | heme oxygenase 1 protein           | AM+K_not_in_group |
| Medtr1g022980 | GTP-binding protein HflX           | AM+K_not_in_group |
| Medtr1g046620 | 'COQ8 Serine/Threonine kinase      | AM+K_not_in_group |
| Medtr1g082900 | DUF1995 domain protein             | AM+K_not_in_group |
| Medtr1g106550 | : Clp protease proteolytic protein | AM+K_not_in_group |
| Medtr1g112860 | ransmembrane protein, putative     | AM+K_not_in_group |
| Medtr1g112990 | DNL zinc finger protein            | AM+K_not_in_group |
| Medtr2g007650 | e phospholipase domain protein     | AM+K_not_in_group |
| Medtr3g024400 | PR containing plant-like protein   | AM+K_not_in_group |
| Medtr3g063250 | nsporter) superfamily permease     | AM+K_not_in_group |
| Medtr3g070960 | ransmembrane protein, putative     | AM+K_not_in_group |
| Medtr3g082750 | unusual kinase, putative           | AM+K_not_in_group |
| Medtr3g491830 | ein phosphatase 2C-like protein    | AM+K_not_in_group |
| Medtr4g007190 | Low PSII accumulation protein      | AM+K_not_in_group |
| Medtr4g063705 | 60 kDa inner membrane protein      | AM+K_not_in_group |
| Medtr4g064820 | sugar transporter                  | AM+K_not_in_group |

diffusion\_prioritization\_ALL

|               |                                      |                   |
|---------------|--------------------------------------|-------------------|
| Medtr4g132020 | senescence regulator                 | AM+K_not_in_group |
| Medtr5g014110 | hypothetical protein                 | AM+K_not_in_group |
| Medtr5g014430 | K protease self-immunity protein     | AM+K_not_in_group |
| Medtr5g016100 | DUF1230 family protein               | AM+K_not_in_group |
| Medtr5g043480 | UvrB/uvrC domain protein             | AM+K_not_in_group |
| Medtr5g068050 | ABC1 family kinase                   | AM+K_not_in_group |
| Medtr6g088460 | hypothetical protein                 | AM+K_not_in_group |
| Medtr7g011850 | plant/MXO21-9 protein                | AM+K_not_in_group |
| Medtr7g033405 | M48 family peptidase                 | AM+K_not_in_group |
| Medtr7g034715 | γ-glucanase                          | AM+K_not_in_group |
| Medtr7g079840 | inc finger CCCH domain protein       | AM+K_not_in_group |
| Medtr7g090150 | omoplast lycopene beta-cyclase       | AM+K_not_in_group |
| Medtr7g094710 | ransmembrane protein, putative       | AM+K_not_in_group |
| Medtr7g112640 | Clp protease proteolytic protein     | AM+K_not_in_group |
| Medtr8g088150 | rocessing peptidase-like protein     | AM+K_not_in_group |
| Medtr8g092030 | ur cluster assembly protein IscA     | AM+K_not_in_group |
| Medtr7g072605 | CBL-interacting kinase               | AM+K_not_in_group |
| Medtr2g100880 | histidine phosphotransfer protein    | AM+K_not_in_group |
| Medtr3g085210 | lipid transfer protein               | AM+K_not_in_group |
| Medtr7g070200 | receptor-like kinase                 | AM+K_not_in_group |
| Medtr3g105370 | icopeptide (PPR) repeat protein      | AM+K_not_in_group |
| Medtr7g012120 | ucosyltransferase family protein     | AM+K_not_in_group |
| Medtr5g072500 | -G0267514-like protein, putative     | AM+K_not_in_group |
| Medtr3g086230 | ore complex family psbY protein      | AM+K_not_in_group |
| Medtr8g078870 | cygen-evolving enhancer protein      | AM+K_not_in_group |
| Medtr4g007550 | ransmembrane protein, putative       | AM+K_not_in_group |
| Medtr7g026320 | hypothetical protein                 | AM+K_not_in_group |
| Medtr8g081510 | ranshydroxymethyltransferase         | AM+K_not_in_group |
| Medtr7g081665 | /Threonine kinase family protein     | AM+K_not_in_group |
| Medtr3g009030 | oside hydrolase family 5 protein     | AM+K_not_in_group |
| Medtr6g011530 | inethiol dioxygenase-like protein    | AM+K_not_in_group |
| Medtr6g027730 | inethiol dioxygenase-like protein    | AM+K_not_in_group |
| Medtr7g009710 | inethiol dioxygenase-like protein    | AM+K_not_in_group |
| Medtr7g086380 | inethiol dioxygenase-like protein    | AM+K_not_in_group |
| Medtr5g035180 | scorbate transporter-like protein    | AM+K_not_in_group |
| Medtr4g049570 | ponsive, dirigent domain protein     | AM+K_not_in_group |
| Medtr4g133952 | ear transcription factor Y protein   | AM+K_not_in_group |
| Medtr8g069080 | ox domain, ZF-HD class protein       | AM+K_not_in_group |
| Medtr7g022440 | :-6-phosphate 1-dehydrogenase        | AM+K_not_in_group |
| Medtr2g018880 | rsceptibility-like protein, putative | AM+K_not_in_group |
| Medtr1g076940 | oflavone-7-O-methyltransferase       | AM+K_not_in_group |
| Medtr8g006930 | xygenase family oxidoreductase       | AM+K_not_in_group |
| Medtr4g007060 | WRKY transcription factor            | AM+K_not_in_group |
| Medtr4g054920 | ochrome P450 family 94 protein       | AM+K_not_in_group |
| Medtr4g091100 | F-box SKIP27-like protein            | AM+K_not_in_group |
| Medtr4g100380 | ethylene response factor             | AM+K_not_in_group |
| Medtr4g116530 | stress induced protein               | AM+K_not_in_group |
| Medtr7g082730 | hypothetical protein                 | AM+K_not_in_group |
| Medtr7g106340 | rotein ligase PUB23-like protein     | AM+K_not_in_group |
| Medtr7g117540 | bunit 11 RING-H2 finger protein      | AM+K_not_in_group |
| Medtr8g098485 | BTB/POZ domain plant protein         | AM+K_not_in_group |

## diffusion\_prioritization\_ALL

|               |                                     |                   |
|---------------|-------------------------------------|-------------------|
| Medtr8g464410 | cytochrome biogenesis protein       | AM+K_not_in_group |
| Medtr2g049400 | pectin lyase superfamily protein    | AM+K_not_in_group |
| Medtr8g014740 | receptor-like kinase                | AM+K_not_in_group |
| Medtr4g116030 | anion transporter 4, putative       | AM+K_not_in_group |
| Medtr3g020470 | ce protein (TIR-NBS-LRR class)      | AM+K_not_in_group |
| Medtr1g011580 | gibberellin 2-beta-dioxygenase      | AM+K_not_in_group |
| Medtr1g116790 | transcription factor                | AM+K_not_in_group |
| Medtr1g061640 | ike DNA-binding domain protein      | AM+K_not_in_group |
| Medtr3g064460 | hypothetical protein                | AM+K_not_in_group |
| Medtr7g113490 | MAP kinase kinase kinase            | AM+K_not_in_group |
| Medtr2g034880 | ransmembrane protein, putative      | AM+K_not_in_group |
| Medtr2g035740 | ransmembrane protein, putative      | AM+K_not_in_group |
| Medtr6g092540 | ranscription factor family protein  | AM+K_not_in_group |
| Medtr2g101710 | PPR containing plant protein        | AM+K_not_in_group |
| Medtr2g461760 | MADS-box transcription factor       | AM+K_not_in_group |
| Medtr4g060460 | uxin response factor-like protein   | AM+K_not_in_group |
| Medtr4g109830 | MADS-box transcription factor       | AM+K_not_in_group |
| Medtr6g464720 | MADS-box transcription factor       | AM+K_not_in_group |
| Medtr2g098540 | oside hydrolase family 1 protein    | AM+K_not_in_group |
| Medtr5g023760 | serine acetyltransferase            | AM+K_not_in_group |
| Medtr5g026390 | hypothetical protein                | AM+K_not_in_group |
| Medtr6g092790 | phospholipase A2 family protein     | AM+K_not_in_group |
| Medtr7g055650 | amino-terminal domain cyclin        | AM+K_not_in_group |
| Medtr1g032730 | sphate synthase domain protein      | AM+K_not_in_group |
| Medtr3g103970 | early flowering protein             | AM+K_not_in_group |
| Medtr8g063790 | sphate synthase domain protein      | AM+K_not_in_group |
| Medtr1g025680 | GDSL-like lipase/acylhydrolase      | AM+K_not_in_group |
| Medtr1g030890 | efflux carrier family transporter   | AM+K_not_in_group |
| Medtr1g041085 | oacyl-CoA synthase-like protein     | AM+K_not_in_group |
| Medtr2g020060 | plant integral membrane protein     | AM+K_not_in_group |
| Medtr2g029830 | peroxidase family protein           | AM+K_not_in_group |
| Medtr4g062270 | oacyl-CoA synthase-like protein     | AM+K_not_in_group |
| Medtr4g084620 | exchanger and transporter sat-1     | AM+K_not_in_group |
| Medtr5g023060 | 1/RBD/RNP motif) family protein     | AM+K_not_in_group |
| Medtr5g056510 | oacyl-CoA synthase-like protein     | AM+K_not_in_group |
| Medtr8g009560 | hydroxylase superfamily protein     | AM+K_not_in_group |
| Medtr8g080050 | n ABC transporter family protein    | AM+K_not_in_group |
| Medtr2g023150 | s_r-like kinase (other strand read) | AM+K_not_in_group |
| Medtr3g115940 | ismembrane MLO family protein       | AM+K_not_in_group |
| Medtr6g069400 | iger (Ran-binding) family protein   | AM+K_not_in_group |
| Medtr5g059820 | e reductase [NADH]-like protein     | AM+K_not_in_group |
| Medtr3g072160 | BTB/POZ domain protein              | AM+K_not_in_group |
| Medtr8g103320 | /TSO1-like CXC domain protein       | AM+K_not_in_group |
| Medtr3g096900 | beta-galactosidase                  | AM+K_not_in_group |
| Medtr3g449600 | s_dtr3g449600 (other strand read)   | AM+K_not_in_group |
| Medtr5g055800 | xygenase family oxidoreductase      | AM+K_not_in_group |
| Medtr1g019340 | AGC kinase                          | AM+K_not_in_group |
| Medtr4g116610 | hypothetical protein                | AM+K_not_in_group |
| Medtr1g103490 | Lipid transfer protein              | AM+K_not_in_group |
| Medtr3g070460 | GDSL-like lipase/acylhydrolase      | AM+K_not_in_group |
| Medtr3g086210 | enoyl-(acyl carrier) reductase      | AM+K_not_in_group |

## diffusion\_prioritization\_ALL

|                |                                         |                   |
|----------------|-----------------------------------------|-------------------|
| Medtr7g090970  | rol-3-phosphate dehydrogenase           | AM+K_not_in_group |
| Medtr7g118170  | acyl-CoA synthase-like protein          | AM+K_not_in_group |
| Medtr8g030620  | rol-3-phosphate acyltransferase         | AM+K_not_in_group |
| Medtr8g101650  | transcription factor family protein     | AM+K_not_in_group |
| Medtr4g129560  | transcription factors protein, putative | AM+K_not_in_group |
| Medtr4g102400  | subtilisin-like serine protease         | AM+K_not_in_group |
| Medtr6g464120  | berellin receptor GID1, putative        | AM+K_not_in_group |
| Medtr1g039270  | ase in GUARD CELL-like protein          | AM+K_not_in_group |
| Medtr4g130920  | ceptor-like kinase family protein       | AM+K_not_in_group |
| Medtr3g099767  | dependent kinase family protein         | AM+K_not_in_group |
| Medtr0096s0020 | protease self-immunity protein          | AM+K_not_in_group |
| Medtr1g043410  | RING-H2 zinc finger protein             | AM+K_not_in_group |
| Medtr1g066750  | hypothetical protein                    | AM+K_not_in_group |
| Medtr1g106190  | A/B protein ligase family protein       | AM+K_not_in_group |
| Medtr6g009260  | polyphosphate 5-phosphatase I           | AM+K_not_in_group |
| Medtr7g444860  | sa promoter-binding-like protein        | AM+K_not_in_group |
| Medtr1g084790  | LRR receptor-like kinase                | AM+K_not_in_group |
| Medtr8g022270  | transporter B family-like protein       | AM+K_not_in_group |
| Medtr6g012640  | ransmembrane protein, putative          | AM+K_not_in_group |
| Medtr8g087310  | )-binding rossmann-fold protein         | AM+K_not_in_group |
| Medtr4g106970  | phosphoglycerate mutase                 | AM+K_not_in_group |
| Medtr4g118780  | cyclin-dependent kinase                 | AM+K_not_in_group |
| Medtr8g037800  | ransmembrane protein, putative          | AM+K_not_in_group |
| Medtr3g114850  | plastocyanin                            | AM+K_not_in_group |
| Medtr6g028030  | annexin D8                              | AM+K_not_in_group |
| Medtr2g089930  | wound-responsive family protein         | AM+K_not_in_group |
| Medtr4g122110  | onsive, dirigent domain protein         | AM+K_in_group     |
| Medtr4g091220  | ransmembrane protein, putative          | AM+K_not_in_group |
| Medtr6g033055  | osylase/hydrolase family protein        | AM+K_not_in_group |
| Medtr0005s0200 | . type disease resistance protein       | AM+K_not_in_group |
| Medtr4g028960  | plant U-box protein                     | AM+K_not_in_group |
| Medtr1g079530  | GDSL-like lipase/acylhydrolase          | AM+K_not_in_group |
| Medtr2g038160  | ransmembrane protein, putative          | AM+K_not_in_group |
| Medtr3g014790  | peptide/nitrate transporter plant       | AM+K_not_in_group |
| Medtr3g049730  | LCR-like protein                        | AM+K_not_in_group |
| Medtr3g049780  | LCR-like protein                        | AM+K_not_in_group |
| Medtr3g095830  | ine N-methyltransferase ATXR5           | AM+K_not_in_group |
| Medtr3g453090  | LCR-like protein                        | AM+K_not_in_group |
| Medtr3g453140  | LCR-like protein                        | AM+K_not_in_group |
| Medtr4g131500  | temperature-induced lipocalin           | AM+K_not_in_group |
| Medtr5g049180  | osyl hydrolase family 10 protein        | AM+K_not_in_group |
| Medtr6g025710  | SCR-like protein                        | AM+K_not_in_group |
| Medtr6g037700  | methylesterase inhibitor protein        | AM+K_not_in_group |
| Medtr6g037710  | ransmembrane protein, putative          | AM+K_not_in_group |
| Medtr7g033870  | ne-Rich (NCR) secreted peptide          | AM+K_not_in_group |
| Medtr7g059440  | LCR                                     | AM+K_not_in_group |
| Medtr7g083700  | B3 domain transcription factor          | AM+K_not_in_group |
| Medtr8g062800  | berellin-regulated family protein       | AM+K_not_in_group |
| Medtr8g094810  | osin group486 secreted peptide          | AM+K_not_in_group |
| Medtr1g052470  | tion factor bHLH122-like protein        | AM+K_not_in_group |
| Medtr1g085240  | hypothetical protein                    | AM+K_not_in_group |



## diffusion\_prioritization\_ALL

|                                                   |                   |
|---------------------------------------------------|-------------------|
| Medtr4g126120 drolase carboxy-terminal protein    | AM+K_not_in_group |
| Medtr8g036790 DIS3-exonuclease-like protein       | AM+K_not_in_group |
| Medtr8g061090 e transporter OPT family protein    | AM+K_not_in_group |
| Medtr6g027840 repeat RF-like protein, putative    | AM+K_not_in_group |
| Medtr1g026860 id aminotransferase-like protein    | AM+K_not_in_group |
| Medtr1g040875 CBL-interacting kinase              | AM+K_not_in_group |
| Medtr1g063110 umarate:CoA ligase-like protein     | AM+K_not_in_group |
| Medtr1g077210 plant/F12B17-70 protein             | AM+K_not_in_group |
| Medtr2g079650 a-synthase (CBS) family protein     | AM+K_not_in_group |
| Medtr2g087460 FAF-like protein                    | AM+K_in_group     |
| Medtr2g097800 hypothetical protein                | AM+K_not_in_group |
| Medtr3g096050 aaffeic acid O-methyltransferase    | AM+K_not_in_group |
| Medtr3g099620 (LH) DNA-binding family protein     | AM+K_not_in_group |
| Medtr3g467140 cytochrome P450 family protein      | AM+K_not_in_group |
| Medtr4g066640 oside hydrolase family 1 protein    | AM+K_not_in_group |
| Medtr5g073020 ochrome P450 family 71 protein      | AM+K_not_in_group |
| Medtr5g075040 hypothetical protein                | AM+K_not_in_group |
| Medtr6g021615 ne-Rich (NCR) secreted peptide      | AM+K_not_in_group |
| Medtr6g021615_s eted peptide (other strand read)  | AM+K_not_in_group |
| Medtr7g062540 auxin response factor 2             | AM+K_not_in_group |
| Medtr7g074220 hypothetical protein                | AM+K_in_group     |
| Medtr7g078010 xygenase family oxidoreductase      | AM+K_in_group     |
| Medtr8g013900 CASP-like protein                   | AM+K_not_in_group |
| Medtr8g014640 stem 28 kDa glycoprotein            | AM+K_not_in_group |
| Medtr8g018790 tive aminopeptidase-like protein    | AM+K_not_in_group |
| Medtr2g055690 LRR receptor-like kinase            | AM+K_not_in_group |
| Medtr8g009660 :-phosphate pyrophosphokinase       | AM+K_not_in_group |
| Medtr6g084400 plant synaptotagmin                 | AM+K_not_in_group |
| Medtr4g119580 mTERF protein                       | AM+K_not_in_group |
| Medtr1g093060 50S ribosomal protein L3P           | AM+K_not_in_group |
| Medtr7g089770 DNA-binding protein                 | AM+K_not_in_group |
| Medtr8g461120 LRR receptor-like kinase            | AM+K_not_in_group |
| Medtr3g093830 WRKY family transcription factor    | AM+K_not_in_group |
| Medtr5g070360 Lipid transfer protein              | AM+K_not_in_group |
| Medtr5g085200 inc finger CCCH domain protein      | AM+K_not_in_group |
| Medtr7g079180 mbryogenesis abundant protein       | AM+K_not_in_group |
| Medtr8g028765 rring glycosyl group transferase    | AM+K_not_in_group |
| Medtr8g074920 ptor-like kinase theseus protein    | AM+K_in_group     |
| Medtr4g076440 can endo-1,3-beta-glucosidase       | AM+K_not_in_group |
| Medtr7g102380 allergen Pru protein, putative      | AM+K_not_in_group |
| Medtr3g079340 ed disease susceptibility protein   | AM+K_not_in_group |
| Medtr4g076640 hypothetical protein                | AM+K_not_in_group |
| Medtr8g104490 calmodulin-binding-like protein     | AM+K_not_in_group |
| Medtr1g070185 indoline 4-hydroxylase, putative    | AM+K_not_in_group |
| Medtr2g436930 substrate carrier family protein    | AM+K_not_in_group |
| Medtr3g466410 amino terminal domain protein       | AM+K_not_in_group |
| Medtr4g128160 hypothetical protein                | AM+K_not_in_group |
| Medtr6g071595 annexin D8                          | AM+K_not_in_group |
| Medtr1g094620 o acid transporter family protein   | AM+K_not_in_group |
| Medtr2g064405 sion facilitator family transporter | AM+K_in_group     |
| Medtr4g086020 ferredoxin-nitrite reductase        | AM+K_not_in_group |

## diffusion\_prioritization\_ALL

|                  |                                     |                   |
|------------------|-------------------------------------|-------------------|
| Medtr5g012290    | peptide/nitrate transporter         | AM+K_not_in_group |
| Medtr8g064630    | carbonic anhydrase family protein   | AM+K_not_in_group |
| Medtr0274s0020   | te hydrolase superfamily protein    | AM+K_not_in_group |
| Medtr5g054300    | ranscription factor family protein  | AM+K_not_in_group |
| Medtr1g082290    | histidine phosphotransfer protein   | AM+K_not_in_group |
| Medtr3g035130    | long-chain acyl-CoA synthetase      | AM+K_not_in_group |
| Medtr6g007603_s1 | -like protein (other strand read)   | AM+K_not_in_group |
| Medtr7g111600    | strate-binding X8 domain protein    | AM+K_not_in_group |
| Medtr6g074905    | pecificity kinase domain protein    | AM+K_not_in_group |
| Medtr3g095010    | ABC transporter F family protein    | AM+K_not_in_group |
| Medtr4g005070    | rescence phenotype 173 protein      | AM+K_not_in_group |
| Medtr5g007870    | RelA/SpoT-like protein RSH2         | AM+K_not_in_group |
| Medtr5g078290    | nce-associated protein, putative    | AM+K_not_in_group |
| Medtr1g007990    | ind mitomycin C induced protein     | AM+K_not_in_group |
| Medtr2g028380    | Tu GTP-binding domain protein       | AM+K_not_in_group |
| Medtr3g023270    | rome C biogenesis protein ccsA      | AM+K_not_in_group |
| Medtr4g057290    | G/FYVE/PHD zinc finger protein      | AM+K_not_in_group |
| Medtr5g035170    | ransmembrane protein, putative      | AM+K_not_in_group |
| Medtr5g066610    | hypothetical protein                | AM+K_not_in_group |
| Medtr7g098980    | hypothetical protein                | AM+K_not_in_group |
| Medtr8g012090    | rotein interaction domain protein   | AM+K_not_in_group |
| Medtr8g022130    | gh-affinity potassium transporter   | AM+K_not_in_group |
| Medtr8g056060    | iquitin ligase, SKP1 component      | AM+K_not_in_group |
| Medtr8g468400    | ligase I, ATP-dependent protein     | AM+K_not_in_group |
| Medtr7g086940    | ischel-related homeobox protein     | AM+K_not_in_group |
| Medtr7g112000    | calmodulin-binding protein          | AM+K_not_in_group |
| Medtr2g007970    | auxin-induced 5NG4-like protein     | AM+K_not_in_group |
| Medtr5g073470    | ransmembrane protein, putative      | AM+K_not_in_group |
| Medtr1g088940    | LRR receptor-like kinase            | AM+K_not_in_group |
| Medtr2g014960    | LRR receptor-like kinase            | AM+K_not_in_group |
| Medtr4g478140    | ococlaurine synthase-like protein   | AM+K_not_in_group |
| Medtr4g086620    | calmodulin-binding protein          | AM+K_not_in_group |
| Medtr1g041150    | lin-domain kinase CDPK protein      | AM+K_not_in_group |
| Medtr2g084565    | m transporter MRS2-like protein     | AM+K_not_in_group |
| Medtr0148s0080   | ocus lectin kinase family protein   | AM+K_not_in_group |
| Medtr4g115920    | alactosyldiacylglycerol synthase    | AM+K_not_in_group |
| Medtr3g058740    | (TIR-NBS-LRR class), putative       | AM+K_not_in_group |
| Medtr1g072420    | endoglucanase inhibitor protein     | AM+K_not_in_group |
| Medtr1g086080    | ABC transporter B family protein    | AM+K_not_in_group |
| Medtr2g095880    | nase rickvii-like protein, putative | AM+K_not_in_group |
| Medtr2g099950    | cell-wall invertase                 | AM+K_not_in_group |
| Medtr4g030040    | anic cation/carnitine transporter   | AM+K_not_in_group |
| Medtr4g117960    | ucosyltransferase family protein    | AM+K_not_in_group |
| Medtr7g088570    | 24-type RING zinc finger protein    | AM+K_not_in_group |
| Medtr8g030690    | U-box kinase family protein         | AM+K_not_in_group |
| Medtr0693s0030   | ASP POPTRDRAFT-like protein         | AM+K_not_in_group |
| Medtr1g077800    | /Threonine kinase family protein    | AM+K_not_in_group |
| Medtr5g035670    | DUF1262 family protein              | AM+K_not_in_group |
| Medtr8g087820    | phosphodiesterase-like protein      | AM+K_not_in_group |
| Medtr2g067560    | papain family cysteine protease     | AM+K_not_in_group |
| Medtr4g051662    | NB-ARC domain protein               | AM+K_not_in_group |

## diffusion\_prioritization\_ALL

|                |                                                      |                   |
|----------------|------------------------------------------------------|-------------------|
| Medtr0010s0210 | hypothetical protein                                 | AM+K_not_in_group |
| Medtr2g076070  | pathogenesis-like protein                            | AM+K_not_in_group |
| Medtr2g101650  | peptide/nitrate transporter plant                    | AM+K_not_in_group |
| Medtr4g051370  | CP47 chlorophyll A apoprotein                        | AM+K_not_in_group |
| Medtr4g094605  | chlorophyll A/B-binding protein                      | AM+K_not_in_group |
| Medtr7g109520  | calvin cycle protein CP12-1                          | AM+K_not_in_group |
| Medtr8g045210  | 50S ribosomal protein L33                            | AM+K_not_in_group |
| Medtr2g016800  | transmembrane protein, putative                      | AM+K_not_in_group |
| Medtr2g090695  | transmembrane protein, putative                      | AM+K_not_in_group |
| Medtr7g407010  | involved in the MVB pathway protein                  | AM+K_not_in_group |
| Medtr0045s0060 | cytochrome P450 family 90 protein                    | AM+K_not_in_group |
| Medtr6g071190  | folded compound leaf protein                         | AM+K_not_in_group |
| Medtr4g086480  | CXE carboxylesterase                                 | AM+K_not_in_group |
| Medtr0021s0370 | chitin synthase-like plant protein                   | AM+K_not_in_group |
| Medtr1g047670  | receptor-like kinase family protein                  | AM+K_not_in_group |
| Medtr3g049755  | LCR-like protein                                     | AM+K_not_in_group |
| Medtr3g055320  | LCR-like protein                                     | AM+K_not_in_group |
| Medtr7g066500  | LCR-like protein                                     | AM+K_not_in_group |
| Medtr8g093800  | deacetylase superfamily protein                      | AM+K_not_in_group |
| Medtr2g085025  | transcriptional activator                            | AM+K_not_in_group |
| Medtr5g018670  | cytogen-evolving enhancer protein                    | AM+K_not_in_group |
| Medtr8g090205  | transcription factor binding transcription activator | AM+K_not_in_group |
| Medtr2g016190  | DUF688 family protein                                | AM+K_not_in_group |
| Medtr3g464870  | main disease resistance protein                      | AM+K_not_in_group |
| Medtr5g022350  | chitinase-related thaumatin family protein           | AM+K_not_in_group |
| Medtr6g032830  | transcription factor family protein                  | AM+K_not_in_group |
| Medtr2g029300  | defective 3 GTP-binding protein                      | AM+K_not_in_group |
| Medtr4g023570  | F-box protein                                        | AM+K_not_in_group |
| Medtr3g101210  | MAP kinase                                           | AM+K_not_in_group |
| Medtr1g028380  | acid receptor PYL9-like protein                      | AM+K_not_in_group |
| Medtr1g090853  | DNA-binding protein PD2                              | AM+K_not_in_group |
| Medtr1g053900  | DUF761 domain protein                                | AM+K_not_in_group |
| Medtr7g109320  | myb transcription factor                             | AM+K_not_in_group |
| Medtr3g102770  | oxidase 5-beta-reductase-like protein                | AM+K_not_in_group |
| Medtr4g133620  | auxin-responsive family protein                      | AM+K_not_in_group |
| Medtr4g082305  | large subunit N-methyltransferase                    | AM+K_not_in_group |
| Medtr1g015520  | hypothetical protein                                 | AM+K_not_in_group |
| Medtr3g051610  | DUF4228 domain protein                               | AM+K_not_in_group |
| Medtr4g120760  | transmembrane protein bet V I family protein         | AM+K_not_in_group |
| Medtr8g098495  | mannan-rich glycoprotein family protein              | AM+K_not_in_group |
| Medtr1g083950  | universal stress family protein                      | AM+K_not_in_group |
| Medtr3g080860  | hypothetical protein                                 | AM+K_not_in_group |
| Medtr5g031160  | legume lectin beta domain protein                    | AM+K_not_in_group |
| Medtr1g090820  | leghemoglobin Lb120-1                                | AM+K_not_in_group |
| Medtr1g019940  | patatin-like phospholipase                           | AM+K_not_in_group |
| Medtr2g021690  | T1.3 protein                                         | AM+K_not_in_group |
| Medtr2g090755  | glutaredoxin-C1 protein                              | AM+K_not_in_group |
| Medtr3g065140  | carbon-sulfur lyase                                  | AM+K_not_in_group |
| Medtr3g088815  | hypothetical protein                                 | AM+K_not_in_group |
| Medtr3g101900  | serine acyl-transferase family protein               | AM+K_not_in_group |
| Medtr3g111610  | phosphatidylserine SUR4 membrane family protein      | AM+K_not_in_group |

## diffusion\_prioritization\_ALL

|                                                  |                   |
|--------------------------------------------------|-------------------|
| Medtr4g083140 ransmembrane protein, putative     | AM+K_not_in_group |
| Medtr5g088770 steine protease inhibitor cystatin | AM+K_not_in_group |
| Medtr7g065590 glutathione S-transferase          | AM+K_not_in_group |
| Medtr7g065600 , amino-terminal domain protein    | AM+K_not_in_group |
| Medtr7g098750 sporter-like ABC domain protein    | AM+K_not_in_group |
| Medtr7g106420 syntaxin of plants 122 protein     | AM+K_not_in_group |
| Medtr8g076680 epoxide hydrolase                  | AM+K_not_in_group |
| Medtr4g023030 use protein O-fucosyltransferase   | AM+K_not_in_group |
| Medtr5g016450 rnal effect embryo arrest protein  | AM+K_not_in_group |
| Medtr7g102990 nd RING-type zinc finger protein   | AM+K_not_in_group |
| Medtr8g074810 4-hydroxylase alpha-like protein   | AM+K_not_in_group |
| Medtr7g086110 ffect modulator 3) family protein  | AM+K_not_in_group |
| Medtr4g094610 ceptor-like kinase family protein  | AM+K_not_in_group |
| Medtr3g101290 myb transcription factor           | AM+K_not_in_group |
| Medtr3g019120 PT11-like tyrosine-kinase          | AM+K_not_in_group |
| Medtr1g018510 subtilisin-like serine protease    | AM+K_not_in_group |
| Medtr1g101370 thyltransferase PMT16, putative    | AM+K_not_in_group |
| Medtr4g076590 hypothetical protein               | AM+K_not_in_group |
| Medtr6g059700 hypothetical protein               | AM+K_not_in_group |
| Medtr8g018260 ce protein (TIR-NBS-LRR class)     | AM+K_not_in_group |
| Medtr2g101820 stem I reaction center subunit VI  | AM+K_not_in_group |
| Medtr4g132420 c proteinase superfamily protein   | AM+K_not_in_group |
| Medtr7g100050 aA-like transporter family protein | AM+K_not_in_group |
| Medtr2g105340 hypothetical protein               | AM+K_not_in_group |
| Medtr7g100700 hypothetical protein               | AM+K_not_in_group |
| Medtr8g463270 dynamin 5A-like protein            | AM+K_not_in_group |
| Medtr3g102650 amily RNA-binding repeatprotein    | AM+K_not_in_group |
| Medtr4g105530 histidine kinase-, DNA gyrase B    | AM+K_not_in_group |
| Medtr3g078633 ed disease susceptibility protein  | AM+K_not_in_group |
| Medtr4g122960 re carboxypeptidase-like protein   | AM+K_not_in_group |
| Medtr5g032520 MADS-box transcription factor      | AM+K_not_in_group |
| Medtr7g101930 netal-associated domain protein    | AM+K_not_in_group |
| Medtr4g094958 LRR receptor-like kinase           | AM+K_not_in_group |
| Medtr4g108270 tyrosine kinase family protein     | AM+K_not_in_group |
| Medtr4g072880 auxin-responsive family protein    | AM+K_not_in_group |
| Medtr3g023830 tin-like domain plant-like protein | AM+K_not_in_group |
| Medtr8g096380 ubiquitin-fold protein 4 precursor | AM+K_not_in_group |
| Medtr3g112220 BZIP transcription factor          | AM+K_not_in_group |
| Medtr8g083170 -acid CoA ligase (AMP-forming)     | AM+K_not_in_group |
| Medtr4g130220 ransmembrane protein, putative     | AM+K_not_in_group |
| Medtr5g037310 ise galacturonan-binding protein   | AM+K_not_in_group |
| Medtr4g036815 F-box-like protein                 | AM+K_not_in_group |
| Medtr2g036430 ceptor-like kinase family protein  | AM+K_not_in_group |
| Medtr1g069355 ansducin/WD-like repeat-protein    | AM+K_not_in_group |
| Medtr2g029340 ive 3 GTP-binding family protein   | AM+K_not_in_group |
| Medtr4g070190 1/RBD/RNP motif) family protein    | AM+K_not_in_group |
| Medtr4g121020 onse regulator ARR2-like protein   | AM+K_not_in_group |
| Medtr5g023050 phospholipase D alpha 1            | AM+K_not_in_group |
| Medtr7g096160 galacturonosyltransferase          | AM+K_not_in_group |
| Medtr1g052535 GTP-binding protein TypA/BipA      | AM+K_not_in_group |
| Medtr1g071540 racting (KIP1-like) family protein | AM+K_not_in_group |

## diffusion\_prioritization\_ALL

|               |                                     |                   |
|---------------|-------------------------------------|-------------------|
| Medtr3g039810 | mini zinc finger protein            | AM+K_not_in_group |
| Medtr3g109900 | DUF761 domain protein               | AM+K_not_in_group |
| Medtr4g103550 | ase regulatory subunit gamma 1      | AM+K_not_in_group |
| Medtr4g115530 | glycosyltransferase                 | AM+K_not_in_group |
| Medtr5g014960 | in amino acid aminotransferase      | AM+K_not_in_group |
| Medtr4g060500 | ne B561, amino-terminal protein     | AM+K_not_in_group |
| Medtr5g080390 | amily RNA-binding repeatprotein     | AM+K_not_in_group |
| Medtr8g012410 | hypothetical protein                | AM+K_not_in_group |
| Medtr8g102650 | PR containing plant-like protein    | AM+K_not_in_group |
| Medtr7g085540 | casein kinase I-like protein        | AM+K_not_in_group |
| Medtr1g056180 | 1 amino-terminal domain protein     | AM+K_not_in_group |
| Medtr4g063905 | 1 phosphatase 2C family protein     | AM+K_not_in_group |
| Medtr4g100920 | asparagine-tRNA ligase              | AM+K_not_in_group |
| Medtr5g077770 | utward rectifying channel protein   | AM+K_not_in_group |
| Medtr8g012390 | heavy metal P-type ATPase           | AM+K_not_in_group |
| Medtr5g078270 | hypothetical protein                | AM+K_not_in_group |
| Medtr2g005570 | ation factor EF1B, gamma chain      | AM+K_not_in_group |
| Medtr3g061130 | RNA-binding pno1-like protein       | AM+K_not_in_group |
| Medtr5g044200 | modification-related protein Eaf7   | AM+K_not_in_group |
| Medtr8g016300 | 50S ribosomal L30-like protein      | AM+K_not_in_group |
| Medtr8g023820 | ne production factor-like protein   | AM+K_not_in_group |
| Medtr1g030820 | ;/dehydrase and lipid transporter   | AM+K_not_in_group |
| Medtr1g053130 | DUF617 family protein               | AM+K_not_in_group |
| Medtr1g077000 | peroxidase family protein           | AM+K_not_in_group |
| Medtr1g094085 | 1 transcription factor-like protein | AM+K_not_in_group |
| Medtr1g100315 | ort-chain dehydrogenase TIC 32      | AM+K_not_in_group |
| Medtr2g022960 | hypothetical protein                | AM+K_not_in_group |
| Medtr2g036380 | heavy metal ATPase transporter      | AM+K_not_in_group |
| Medtr2g083430 | ucosyltransferase family protein    | AM+K_not_in_group |
| Medtr3g065250 | mine synthetase domain protein      | AM+K_not_in_group |
| Medtr3g078380 | heavy chain kinase B-like protein   | AM+K_not_in_group |
| Medtr3g090530 | fer protein (GLTP) family protein   | AM+K_not_in_group |
| Medtr3g108320 | otassium channel KAT3 protein       | AM+K_not_in_group |
| Medtr4g073090 | id 5-beta-reductase-like protein    | AM+K_not_in_group |
| Medtr4g084040 | thione S-transferase-like protein   | AM+K_not_in_group |
| Medtr4g095310 | sigb regulation rsbq-like protein   | AM+K_not_in_group |
| Medtr4g102890 | hypothetical protein                | AM+K_not_in_group |
| Medtr4g117400 | ,4-beta-D-glucanase-like protein    | AM+K_not_in_group |
| Medtr5g042920 | WRKY transcription factor 3         | AM+K_not_in_group |
| Medtr5g055690 | nthase/flavanone 3-hydroxylase      | AM+K_not_in_group |
| Medtr5g055820 | nthase/flavanone 3-hydroxylase      | AM+K_not_in_group |
| Medtr7g065160 | Lipid transfer protein              | AM+K_not_in_group |
| Medtr7g112960 | epoxide hydrolase                   | AM+K_not_in_group |
| Medtr8g012550 | ;/dehydrase and lipid transporter   | AM+K_not_in_group |
| Medtr8g045570 | ted protein bet V I family protein  | AM+K_not_in_group |
| Medtr8g045890 | embryonic abundant-like protein     | AM+K_not_in_group |
| Medtr8g096640 | ransmembrane protein, putative      | AM+K_not_in_group |
| Medtr7g118110 | tyrosine kinase domain protein      | AM+K_not_in_group |
| Medtr5g086540 | LysM receptor kinase K1B            | AM+K_not_in_group |
| Medtr2g009740 | flavonoid glucosyltransferase       | AM+K_not_in_group |
| Medtr2g037300 | ular-weight cysteine-rich protein   | AM+K_not_in_group |

diffusion\_prioritization\_ALL

|               |                                                            |                   |
|---------------|------------------------------------------------------------|-------------------|
| Medtr3g049820 | LCR-like protein                                           | AM+K_not_in_group |
| Medtr6g051770 | LCR-like protein                                           | AM+K_not_in_group |
| Medtr8g104480 | carboxyl-terminal peptidase                                | AM+K_not_in_group |
| Medtr6g038750 | unusual kinase, putative                                   | AM+K_not_in_group |
| Medtr3g099850 | Sas10/Utp3/C1D family protein                              | AM+K_not_in_group |
| Medtr3g018790 | annexin D8                                                 | AM+K_in_group     |
| Medtr1g105860 | LK (receptor-like kinase) protein                          | AM+K_not_in_group |
| Medtr3g104740 | coclaurine N-methyltransferase                             | AM+K_not_in_group |
| Medtr4g008650 | rim-translocating P-type ATPase                            | AM+K_not_in_group |
| Medtr7g031420 | rec8-like protein 1 protein                                | AM+K_not_in_group |
| Medtr8g038990 | DNA-directed RNA polymerase                                | AM+K_not_in_group |
| Medtr1g100110 | receptor-like kinase family protein                        | AM+K_not_in_group |
| Medtr2g096540 | transcription factor family protein, putative              | AM+K_not_in_group |
| Medtr2g035440 | phosphatase-like hydrolase domain protein                  | AM+K_not_in_group |
| Medtr7g098280 | hypothetical protein                                       | AM+K_not_in_group |
| Medtr7g106500 | glutathione reductase (GRX) family protein                 | AM+K_not_in_group |
| Medtr4g088750 | tyrosine kinase family protein                             | AM+K_not_in_group |
| Medtr3g010180 | phosphatidylinositol 3-OH kinase-like-GPI-anchored protein | AM+K_not_in_group |
| Medtr3g097350 | patellin-3 protein                                         | AM+K_not_in_group |
| Medtr4g020040 | phosphatidylcholine phosphorylceramide synthase            | AM+K_not_in_group |
| Medtr1g067720 | hypothetical protein                                       | AM+K_not_in_group |
| Medtr3g045720 | transferase family protein, putative                       | AM+K_not_in_group |
| Medtr5g055150 | protein 1(TBP-1)-interacting protein                       | AM+K_not_in_group |
| Medtr5g072760 | myosin-like protein                                        | AM+K_not_in_group |
| Medtr8g011440 | LK (receptor-like kinase) protein                          | AM+K_not_in_group |
| Medtr2g045470 | CBL-interacting kinase                                     | AM+K_not_in_group |
| Medtr5g006750 | malonate reductase-like protein                            | AM+K_not_in_group |
| Medtr7g015390 | feronia receptor-like kinase                               | AM+K_not_in_group |
| Medtr8g067530 | responsive AUX/IAA family protein                          | AM+K_not_in_group |
| Medtr7g021570 | LRR receptor-like kinase                                   | AM+K_not_in_group |
| Medtr2g075590 | transmembrane protein, putative                            | AM+K_not_in_group |
| Medtr3g045790 | DUF4228 domain protein                                     | AM+K_not_in_group |
| Medtr5g033100 | MATE efflux family protein                                 | AM+K_not_in_group |
| Medtr6g078630 | resistance protein (TIR-NBS-LRR class)                     | AM+K_not_in_group |
| Medtr7g115360 | hypothetical protein                                       | AM+K_not_in_group |
| Medtr8g016480 | resistance protein (TIR-NBS-LRR class)                     | AM+K_not_in_group |
| Medtr8g046260 | plant acid phosphatase                                     | AM+K_not_in_group |
| Medtr5g084410 | hypothetical protein                                       | AM+K_not_in_group |
| Medtr5g096150 | pyruvate catabolite reductase, putative                    | AM+K_not_in_group |
| Medtr2g022520 | protein with YGL and LRDR motif                            | AM+K_not_in_group |
| Medtr3g067730 | histidine movement impaired protein                        | AM+K_not_in_group |
| Medtr4g087300 | transcription factor-like protein                          | AM+K_not_in_group |
| Medtr6g043460 | peroxidase family protein                                  | AM+K_not_in_group |
| Medtr7g058530 | serine kinase, plant-type protein                          | AM+K_not_in_group |
| Medtr8g066210 | phosphatase hydrolase superfamily protein                  | AM+K_not_in_group |
| Medtr3g106750 | Lipid transfer protein                                     | AM+K_not_in_group |
| Medtr4g020070 | LRR receptor-like kinase                                   | AM+K_not_in_group |
| Medtr3g110195 | transmembrane epithelial membrane protein                  | AM+K_in_group     |
| Medtr3g415670 | transmembrane protein, putative                            | AM+K_not_in_group |
| Medtr4g079630 | protein gene family member MtCLE12                         | AM+K_not_in_group |
| Medtr6g088625 | hypothetical protein                                       | AM+K_not_in_group |

## diffusion\_prioritization\_ALL

|               |                                     |                   |
|---------------|-------------------------------------|-------------------|
| Medtr1g015120 | hypothetical protein                | AM+K_not_in_group |
| Medtr1g045930 | triacylglycerol lipase, putative    | AM+K_not_in_group |
| Medtr1g080410 | cessing protein PRP39, putative     | AM+K_not_in_group |
| Medtr2g013080 | RING zinc finger protein            | AM+K_not_in_group |
| Medtr2g450730 | DD8 ultimate buster-like protein    | AM+K_not_in_group |
| Medtr3g093590 | inositide-interacting-like protein  | AM+K_not_in_group |
| Medtr4g127450 | ain of gyp1p superfamily protein    | AM+K_not_in_group |
| Medtr7g098900 | ansducin/WD-like repeat-protein     | AM+K_not_in_group |
| Medtr8g074040 | long-chain acyl-CoA synthetase      | AM+K_not_in_group |
| Medtr2g034280 | GRAS family transcription factor    | AM+K_in_group     |
| Medtr1g083740 | e-stranded DNA-binding protein      | AM+K_not_in_group |
| Medtr1g042770 | hypothetical protein                | AM+K_not_in_group |
| Medtr1g072630 | legumin storage protein             | AM+K_not_in_group |
| Medtr2g037345 | Defensin fusion                     | AM+K_not_in_group |
| Medtr2g072500 | l,3-beta-glucosidase-like protein   | AM+K_not_in_group |
| Medtr2g076780 | ox domain, ZF-HD class protein      | AM+K_not_in_group |
| Medtr3g054330 | O-methyltransferase-like protein    | AM+K_not_in_group |
| Medtr4g035353 | GDSL-like lipase/acylhydrolase      | AM+K_not_in_group |
| Medtr4g038310 | ivity in the MVB pathway protein    | AM+K_not_in_group |
| Medtr4g057825 | ribonuclease T2 family protein      | AM+K_not_in_group |
| Medtr4g070720 | dylinositol transfer family protein | AM+K_not_in_group |
| Medtr4g108280 | use oxidase/kelch repeat protein    | AM+K_not_in_group |
| Medtr4g125680 | plant/MOK9-4 protein                | AM+K_not_in_group |
| Medtr6g066280 | plant/F9H3-4 protein                | AM+K_not_in_group |
| Medtr7g013120 | expansin A10                        | AM+K_not_in_group |
| Medtr7g073030 | Lipid transfer protein              | AM+K_not_in_group |
| Medtr8g088080 | porter TauE/SafE family protein     | AM+K_not_in_group |
| Medtr4g027425 | eotidyltransferase family protein   | AM+K_not_in_group |
| Medtr4g014460 | abscisic acid receptor              | AM+K_not_in_group |
| Medtr1g037520 | ransmembrane protein, putative      | AM+K_not_in_group |
| Medtr2g035130 | ase-resistance response protein     | AM+K_not_in_group |
| Medtr3g115490 | /Threonine kinase family protein    | AM+K_not_in_group |
| Medtr4g085100 | istid movement impaired protein     | AM+K_not_in_group |
| Medtr8g079475 | hypothetical protein                | AM+K_not_in_group |
| Medtr1g048030 | e nucleotide-binding-like protein   | AM+K_not_in_group |
| Medtr1g031460 | receptor-like kinase                | AM+K_not_in_group |
| Medtr4g078290 | cyclin-dependent kinase             | AM+K_not_in_group |
| Medtr5g072510 | DUF640 family protein               | AM+K_not_in_group |
| Medtr3g077630 | ransmembrane protein, putative      | AM+K_not_in_group |
| Medtr5g038850 | hypothetical protein                | AM+K_not_in_group |
| Medtr7g027890 | ose synthase 1 catalytic subunit    | AM+K_not_in_group |
| Medtr8g019540 | AAT-binding transcription factor    | AM+K_not_in_group |
| Medtr2g005590 | RNA-binding KH domain protein       | AM+K_not_in_group |
| Medtr4g133890 | ysin II heavy chain family protein  | AM+K_not_in_group |
| Medtr5g083030 | ubiquitin-protein ligase, PUB17     | AM+K_not_in_group |
| Medtr7g116710 | ABIL1-like protein                  | AM+K_not_in_group |
| Medtr4g008160 | 60S ribosomal protein L7            | AM+K_not_in_group |
| Medtr2g013160 | erase II transcription subunit 16   | AM+K_not_in_group |
| Medtr8g057120 | hypothetical protein                | AM+K_not_in_group |
| Medtr6g007980 | senescence-associated protein       | AM+K_not_in_group |
| Medtr5g088400 | tyrosine kinase family protein      | AM+K_not_in_group |

## diffusion\_prioritization\_ALL

|                                                   |                   |
|---------------------------------------------------|-------------------|
| Medtr1g063020 osylase/hydrolase family protein    | AM+K_not_in_group |
| Medtr3g072105 o acid transporter family protein   | AM+K_not_in_group |
| Medtr4g023810 gume lectin beta domain protein     | AM+K_not_in_group |
| Medtr3g035840 main disease resistance protein     | AM+K_not_in_group |
| Medtr3g067775 tyrosine kinase family protein      | AM+K_not_in_group |
| Medtr5g023730 yl-CoA synthetase family protein    | AM+K_not_in_group |
| Medtr7g088950 ce protein (TIR-NBS-LRR class)      | AM+K_not_in_group |
| Medtr8g011710 ce protein (TIR-NBS-LRR class)      | AM+K_not_in_group |
| Medtr3g062920 hypothetical protein                | AM+K_not_in_group |
| Medtr5g098780 l chlorophyll A/B-binding protein   | AM+K_not_in_group |
| Medtr3g008920 protein (MIP) family transporter    | AM+K_not_in_group |
| Medtr3g024510 GDSL-like lipase/acylhydrolase      | AM+K_not_in_group |
| Medtr3g084220 auxin-responsive family protein     | AM+K_not_in_group |
| Medtr3g110035 auxin-responsive family protein     | AM+K_not_in_group |
| Medtr3g114120 GDSL-like lipase/acylhydrolase      | AM+K_not_in_group |
| Medtr3g116770 BHLH transcription factor           | AM+K_not_in_group |
| Medtr3g498825_s tor bHLH137 (other strand read)   | AM+K_not_in_group |
| Medtr4g019520 l oxidase amino-terminal protein    | AM+K_not_in_group |
| Medtr4g062170 oacyl-CoA synthase-like protein     | AM+K_not_in_group |
| Medtr4g072230 auxin-responsive family protein     | AM+K_not_in_group |
| Medtr4g072250 auxin-responsive family protein     | AM+K_not_in_group |
| Medtr4g072270 auxin-responsive family protein     | AM+K_not_in_group |
| Medtr4g072280 auxin-responsive family protein     | AM+K_not_in_group |
| Medtr4g072300 auxin-responsive family protein     | AM+K_not_in_group |
| Medtr4g072380 auxin-responsive family protein     | AM+K_not_in_group |
| Medtr4g072465 auxin-responsive family protein     | AM+K_not_in_group |
| Medtr4g072570 auxin-responsive family protein     | AM+K_not_in_group |
| Medtr4g072590 auxin-responsive family protein     | AM+K_not_in_group |
| Medtr4g072600 auxin-responsive family protein     | AM+K_not_in_group |
| Medtr4g072610 auxin-responsive family protein     | AM+K_not_in_group |
| Medtr4g072640 auxin-responsive family protein     | AM+K_not_in_group |
| Medtr4g072650 auxin-responsive family protein     | AM+K_not_in_group |
| Medtr4g072660 auxin-responsive family protein     | AM+K_not_in_group |
| Medtr4g072730 auxin-responsive family protein     | AM+K_not_in_group |
| Medtr4g072830 auxin-responsive family protein     | AM+K_not_in_group |
| Medtr4g072890 auxin-responsive family protein     | AM+K_not_in_group |
| Medtr4g075333 pollen protein Ole E I-like protein | AM+K_not_in_group |
| Medtr4g127700 ion factor/transcription regulator  | AM+K_not_in_group |
| Medtr7g116520 GDSL-like lipase/acylhydrolase      | AM+K_not_in_group |
| Medtr8g096580 beta-dehydrogenase-like protein     | AM+K_not_in_group |
| Medtr8g098435 ochrome P450 family 94 protein      | AM+K_not_in_group |
| Medtr8g447000 A-3-methyladenine glycosylase l     | AM+K_not_in_group |
| Medtr1g061190 ethylene-responsive kinase          | AM+K_not_in_group |
| Medtr5g038620 calmodulin-binding motif protein    | AM+K_not_in_group |
| Medtr6g053680 ile motor family protein, putative  | AM+K_not_in_group |
| Medtr7g092380 chaperone DnaJ domain protein       | AM+K_not_in_group |
| Medtr7g405790 RAB GTPase-like protein A1D         | AM+K_not_in_group |
| Medtr6g461910 DUF3475 domain protein              | AM+K_not_in_group |
| Medtr2g010490 hypothetical protein                | AM+K_not_in_group |
| Medtr2g017810 eracting factor-like phosphatase    | AM+K_in_group     |
| Medtr2g087840 kinesin motor domain protein        | AM+K_not_in_group |



diffusion\_prioritization\_ALL

|               |                                    |                   |
|---------------|------------------------------------|-------------------|
| Medtr2g102680 | MJK13.21 protein                   | AM+K_not_in_group |
| Medtr3g028600 | hypothetical protein               | AM+K_not_in_group |
| Medtr4g123730 | kinesin motor domain protein       | AM+K_not_in_group |
| Medtr5g009120 | tol 3-and 4-kinase family protein  | AM+K_not_in_group |
| Medtr5g022010 | omerase family protein, putative   | AM+K_not_in_group |
| Medtr5g031470 | main Di-glucose-binding protein    | AM+K_not_in_group |
| Medtr5g094310 | kinesin motor domain protein       | AM+K_not_in_group |
| Medtr6g015010 | protein for Xklp2) family protein  | AM+K_not_in_group |
| Medtr6g055360 | endonuclease GEN-like protein      | AM+K_not_in_group |
| Medtr7g035445 | 24-type RING zinc finger protein   | AM+K_not_in_group |
| Medtr8g022240 | CCCH domain protein, putative      | AM+K_not_in_group |
| Medtr8g074000 | carboxy-terminal domain cyclin     | AM+K_not_in_group |
| Medtr1g010250 | ptor kinase-like protein, putative | AM+K_not_in_group |
| Medtr2g049640 | notif 2 in plant MEI2-like protein | AM+K_not_in_group |
| Medtr5g092910 | geranyl pyrophosphate synthase     | AM+K_not_in_group |
| Medtr1g069725 | GRAS family transcription factor   | AM+K_not_in_group |
| Medtr1g087320 | lant protein (LEA) family protein  | AM+K_not_in_group |
| Medtr2g009500 | arbonic anhydrase family protein   | AM+K_not_in_group |
| Medtr3g098170 | zyme A thioesterase-like protein   | AM+K_not_in_group |
| Medtr3g110395 | 6-phosphofructokinase              | AM+K_not_in_group |
| Medtr4g119280 | r C-x8-C-x5-C-x3-H type protein    | AM+K_not_in_group |
| Medtr7g108855 | bunit 11 RING-H2 finger protein    | AM+K_not_in_group |
| Medtr8g009590 | hydroxylase superfamily protein    | AM+K_not_in_group |
| Medtr1g030740 | istid movement impaired protein    | AM+K_not_in_group |
| Medtr1g048370 | ate oxidase/nodulin 35, putative   | AM+K_not_in_group |
| Medtr1g083420 | ypoxia-responsive family protein   | AM+K_not_in_group |
| Medtr2g015560 | pyruvate decarboxylase             | AM+K_not_in_group |
| Medtr2g037790 | inding protein)-related protein 4C | AM+K_not_in_group |
| Medtr3g089977 | ol dehydrogenase family protein    | AM+K_not_in_group |
| Medtr3g110065 | aspartate aminotransferase         | AM+K_not_in_group |
| Medtr4g068860 | Non-symbiotic hemoglobin           | AM+K_not_in_group |
| Medtr8g096840 | ransmembrane protein, putative     | AM+K_not_in_group |
| Medtr4g111750 | e-stranded DNA-binding protein     | AM+K_not_in_group |
| Medtr2g016730 | omain class transcription factor   | AM+K_not_in_group |
| Medtr8g030500 | tor-like Serine/Threonine-kinase   | AM+K_not_in_group |
| Medtr1g104800 | plastocyanin-like domain protein   | AM+K_not_in_group |
| Medtr4g127530 | DUF4228 domain protein             | AM+K_not_in_group |
| Medtr6g035370 | ike DNA-binding domain protein     | AM+K_not_in_group |
| Medtr1g009613 | VRKY family transcription factor   | AM+K_not_in_group |
| Medtr4g019450 | BEL1-like homeodomain protein      | AM+K_not_in_group |
| Medtr5g046750 | plant/F4N2-9 protein, putative     | AM+K_not_in_group |
| Medtr5g025230 | roid cleavage dioxygenase 4a-6     | AM+K_not_in_group |
| Medtr4g072720 | auxin-responsive family protein    | AM+K_not_in_group |
| Medtr1g012610 | tyrosine kinase family protein     | AM+K_not_in_group |
| Medtr6g051840 | !1 domain plant protein, putative  | AM+K_not_in_group |
| Medtr2g008180 | 60S ribosomal protein L36a         | AM+K_not_in_group |
| Medtr3g088010 | DUF740 family protein              | AM+K_not_in_group |
| Medtr4g022720 | e acyl-transferase family protein  | AM+K_not_in_group |
| Medtr5g085860 | homeobox knotted-like protein      | AM+K_not_in_group |
| Medtr7g008040 | te hydrolase superfamily protein   | AM+K_not_in_group |
| Medtr7g093450 | like acyl-esterase family protein  | AM+K_not_in_group |

## diffusion\_prioritization\_ALL

|                                                  |                   |
|--------------------------------------------------|-------------------|
| Medtr3g415650 ProtKB/Swiss-Prot;Acc:P30365]      | AM+K_not_in_group |
| Medtr5g091550 itin carboxyl-terminal hydrolase   | AM+K_not_in_group |
| Medtr1g009980 plastid lipid-associated protein   | AM+K_not_in_group |
| Medtr1g026125 iduced stress protein of 32 kDa)   | AM+K_not_in_group |
| Medtr1g030750 sphoribosyltransferase, putative   | AM+K_not_in_group |
| Medtr1g034260 omplex subunit (PetM), putative    | AM+K_not_in_group |
| Medtr1g045510 l/RBD/RNP motif) family protein    | AM+K_not_in_group |
| Medtr1g069235 m I reaction center subunit IV A   | AM+K_not_in_group |
| Medtr1g070495 hotosystem II reaction center W    | AM+K_not_in_group |
| Medtr1g076310 30S ribosomal S16-like protein     | AM+K_in_group     |
| Medtr1g082420 ylakoid lumen 18.3 kDa protein     | AM+K_not_in_group |
| Medtr1g090730 pendent malate dehydrogenase       | AM+K_not_in_group |
| Medtr1g095110 ha/beta hydrolase family protein   | AM+K_not_in_group |
| Medtr2g008610 l chlorophyll A/B-binding protein  | AM+K_not_in_group |
| Medtr2g015390 ignesium-chelatase subunit Chll    | AM+K_not_in_group |
| Medtr2g029370 stem I reaction center subunit III | AM+K_not_in_group |
| Medtr2g064650 m II 10 kDa proteinPsbR protein    | AM+K_not_in_group |
| Medtr2g079710 tochlorophyllide oxidoreductase    | AM+K_not_in_group |
| Medtr2g081090 l chlorophyll A/B-binding protein  | AM+K_not_in_group |
| Medtr2g090200 photosystem II Pbs27 protein       | AM+K_not_in_group |
| Medtr2g105480 arboxylase/oxygenase activase      | AM+K_not_in_group |
| Medtr3g019320 slocation defect protein, putative | AM+K_not_in_group |
| Medtr3g070340 l chlorophyll A/B-binding protein  | AM+K_not_in_group |
| Medtr3g101740 thioredoxin                        | AM+K_not_in_group |
| Medtr3g449930 n-evolving enhancer protein 2-1    | AM+K_not_in_group |
| Medtr3g462990 le phosphoprotein TSP9 protein     | AM+K_not_in_group |
| Medtr4g015570 l chlorophyll A/B-binding protein  | AM+K_not_in_group |
| Medtr4g019000 ystem II reaction center protein   | AM+K_not_in_group |
| Medtr4g037505 photosystem II 5 kDa protein       | AM+K_not_in_group |
| Medtr4g052420 photosystem I subunit O            | AM+K_not_in_group |
| Medtr4g074590 DUF177 domain protein              | AM+K_not_in_group |
| Medtr4g125600 ultraviolet-B-repressible protein  | AM+K_not_in_group |
| Medtr5g006130 /stem I reaction center subunit II | AM+K_not_in_group |
| Medtr5g037380 , amino-terminal domain protein    | AM+K_not_in_group |
| Medtr5g080450 arboxylase/oxygenase activase      | AM+K_not_in_group |
| Medtr5g097280 l chlorophyll A/B-binding protein  | AM+K_not_in_group |
| Medtr5g098785 l chlorophyll A/B-binding protein  | AM+K_not_in_group |
| Medtr6g018300 sphate carboxylase small chain     | AM+K_not_in_group |
| Medtr6g033320 l chlorophyll A/B-binding protein  | AM+K_not_in_group |
| Medtr6g060175 l chlorophyll A/B-binding protein  | AM+K_not_in_group |
| Medtr7g007230 sphate carboxylase small chain     | AM+K_not_in_group |
| Medtr7g062470 ransmembrane protein, putative     | AM+K_not_in_group |
| Medtr7g079900 stem I reaction center subunit XI  | AM+K_not_in_group |
| Medtr7g092820 hosphatase superfamily protein     | AM+K_not_in_group |
| Medtr7g099390 m I reaction center subunit IV A   | AM+K_not_in_group |
| Medtr7g116795 : phosphoprotein 14 kDa protein    | AM+K_not_in_group |
| Medtr7g117970 plant/F21F14-40 protein            | AM+K_not_in_group |
| Medtr8g005175 ygen-evolving enhancer protein     | AM+K_not_in_group |
| Medtr8g027835 thylakoid rhodanese-like protein   | AM+K_not_in_group |
| Medtr8g085840 chlorophyllide A oxygenase         | AM+K_not_in_group |
| Medtr6g083020 ill-associated kinase-like protein | AM+K_not_in_group |

## diffusion\_prioritization\_ALL

|                |                                            |                   |
|----------------|--------------------------------------------|-------------------|
| Medtr1g090817  | sialoglycoprotein endopeptidase            | AM+K_not_in_group |
| Medtr1g017140  | myb transcription factor                   | AM+K_not_in_group |
| Medtr1g058350  | B3 DNA-binding domain protein              | AM+K_not_in_group |
| Medtr1g044155  | notif DNA-binding family protein           | AM+K_not_in_group |
| Medtr1g107485  | Na <sup>+</sup> /H <sup>+</sup> antiporter | AM+K_not_in_group |
| Medtr4g117250  | 3HC4 type (RING finger) protein            | AM+K_not_in_group |
| Medtr7g090300  | tosidine synthase family protein           | AM+K_not_in_group |
| Medtr7g010000  | ceptor-like kinase family protein          | AM+K_not_in_group |
| Medtr2g099350  | egulator RWP-RK family protein             | AM+K_not_in_group |
| Medtr0339s0030 | lakoid lumenal 16.5 kDa protein            | AM+K_not_in_group |
| Medtr2g082660  | plant/F3H11-7 protein                      | AM+K_not_in_group |
| Medtr4g098490  | S ferredoxin superfamily protein           | AM+K_not_in_group |
| Medtr4g103330  | ype ATP synthase, delta subunit            | AM+K_not_in_group |
| Medtr5g027530  | phosphoribulokinase                        | AM+K_not_in_group |
| Medtr5g043580  | hypothetical protein                       | AM+K_not_in_group |
| Medtr8g088420  | tyrosine phosphatase, putative             | AM+K_not_in_group |
| Medtr4g053250  | BZIP family transcription factor           | AM+K_not_in_group |
| Medtr1g046250  | ricing hydrogenase, beta subunit           | AM+K_not_in_group |
| Medtr2g085065  | /Threonine kinase family protein           | AM+K_not_in_group |
| Medtr6g084370  | ce protein (TIR-NBS-LRR class)             | AM+K_not_in_group |
| Medtr3g055120  | ProtKB/Swiss-Prot;Acc:G7J032]              | AM+K_in_group     |
| Medtr3g110390  | early nodulin 93                           | AM+K_not_in_group |
| Medtr7g045370  | arotenoid cleavage dioxygenase             | AM+K_in_group     |
| Medtr7g053310  | DUF506 family protein                      | AM+K_not_in_group |
| Medtr4g126170  | DUF4408 domain protein                     | AM+K_not_in_group |
| Medtr7g068470  | GDSL-like lipase/acylhydrolase             | AM+K_not_in_group |
| Medtr7g033640  | /Threonine kinase family protein           | AM+K_not_in_group |
| Medtr0004s0650 | lycerol-3-phosphate transporter            | AM+K_not_in_group |
| Medtr1g012440  | IDS4-like protein                          | AM+K_not_in_group |
| Medtr1g060360  | hosphatase superfamily protein             | AM+K_not_in_group |
| Medtr4g112790  | inase/uridine kinase-like protein          | AM+K_not_in_group |
| Medtr7g086050  | ensionation (RCC1) family protein          | AM+K_not_in_group |
| Medtr7g104940  | auxin-responsive family protein            | AM+K_not_in_group |
| Medtr8g083520  | le dehydrogenase family protein            | AM+K_not_in_group |
| Medtr5g025960  | anyl-nucleotide exchange factor            | AM+K_not_in_group |
| Medtr5g031300  | hol dehydrogenase-like protein             | AM+K_not_in_group |
| Medtr2g099480  | racting domain protein, putative           | AM+K_not_in_group |
| Medtr1g015290  | ultraviolet-B-repressible protein          | AM+K_not_in_group |
| Medtr4g067150  | tetrapyrrole-binding protein               | AM+K_not_in_group |
| Medtr7g066120  | fructose-1,6-bisphosphatase                | AM+K_not_in_group |
| Medtr7g084800  | de-3-phosphate dehydrogenase               | AM+K_not_in_group |
| Medtr8g023680  | ption factor ERF118-like protein           | AM+K_not_in_group |
| Medtr4g130490  | DUF566 family protein                      | AM+K_not_in_group |
| Medtr5g031090  | legume lectin family protein               | AM+K_not_in_group |
| Medtr4g081190  | ABC transporter B family protein           | AM+K_not_in_group |
| Medtr4g102440  | PGR5-like protein 1A                       | AM+K_not_in_group |
| Medtr8g007140  | patatin-like phospholipase                 | AM+K_not_in_group |
| Medtr3g105430  | ation initiation factor 3 subunit B        | AM+K_not_in_group |
| Medtr8g086380  | CBL-interacting kinase                     | AM+K_not_in_group |
| Medtr3g106400  | ll knotted-like homeobox protein           | AM+K_not_in_group |
| Medtr4g084120  | ne-phosphate synthase enzyme               | AM+K_not_in_group |

## diffusion\_prioritization\_ALL

|                 |                                    |                   |
|-----------------|------------------------------------|-------------------|
| Medtr2g089795   | rotosystem II biogenesis protein   | AM+K_not_in_group |
| Medtr3g028150   | hylakoid luminal 19 kDa protein    | AM+K_not_in_group |
| Medtr7g099950   | hypothetical protein               | AM+K_not_in_group |
| Medtr4g049550   | ponsive, dirigent domain protein   | AM+K_not_in_group |
| Medtr1g008000   | F-box associated protein           | AM+K_not_in_group |
| Medtr1g008420   | BURP domain protein                | AM+K_not_in_group |
| Medtr1g008450   | tration-responsive protein RD22    | AM+K_not_in_group |
| Medtr1g022325   | oxyphenylpyruvate dioxygenase      | AM+K_not_in_group |
| Medtr1g039400   | preferring nucleoside hydrolase    | AM+K_not_in_group |
| Medtr1g046320_s | main protein (other strand read)   | AM+K_not_in_group |
| Medtr1g053430_s | etical protein (other strand read) | AM+K_not_in_group |
| Medtr1g054800   | methylesterase inhibitor protein   | AM+K_not_in_group |
| Medtr1g057220   | ransmembrane protein, putative     | AM+K_not_in_group |
| Medtr1g114050   | core histone H2A/H2B/H3/H4         | AM+K_not_in_group |
| Medtr2g007260   | IA-like transporter family protein | AM+K_not_in_group |
| Medtr2g014020   | Domain, G-beta repeat protein      | AM+K_not_in_group |
| Medtr2g018410   | LCR-like protein                   | AM+K_not_in_group |
| Medtr2g076900   | te hydrolase superfamily protein   | AM+K_not_in_group |
| Medtr2g081110   | le-gated ion channel-like protein  | AM+K_not_in_group |
| Medtr2g101840   | ase/hydroxypyruvate reductase      | AM+K_not_in_group |
| Medtr2g461950_s | eted peptide (other strand read)   | AM+K_not_in_group |
| Medtr3g006820   | aspartyl protease family protein   | AM+K_not_in_group |
| Medtr3g095390   | ransmembrane protein, putative     | AM+K_not_in_group |
| Medtr3g453120   | LCR-like protein                   | AM+K_not_in_group |
| Medtr3g463570   | Leginsulin/Albumin-1               | AM+K_not_in_group |
| Medtr4g046037   | ransmembrane protein, putative     | AM+K_not_in_group |
| Medtr4g075750_s | amily protein (other strand read)  | AM+K_not_in_group |
| Medtr4g076100   | na-aminobutyrate transaminase      | AM+K_not_in_group |
| Medtr4g078410   | plastocyanin-like domain protein   | AM+K_not_in_group |
| Medtr5g018660   | hypothetical protein               | AM+K_not_in_group |
| Medtr6g005380   | germin family protein              | AM+K_not_in_group |
| Medtr6g024020   | ε/pectin methylesterase inhibitor  | AM+K_not_in_group |
| Medtr6g027190   | MATE efflux family protein         | AM+K_not_in_group |
| Medtr6g090290   | aspartyl protease family protein   | AM+K_not_in_group |
| Medtr7g059445_s | ε-like protein (other strand read) | AM+K_not_in_group |
| Medtr7g072980_s | nsfer protein (other strand read)  | AM+K_not_in_group |
| Medtr8g012915   | RALF-like protein                  | AM+K_not_in_group |
| Medtr8g069790   | -like acyl-esterase family protein | AM+K_not_in_group |
| Medtr3g105820   | lope membrane ofs protein 55-II    | AM+K_not_in_group |
| Medtr4g118640   | -xylulose-5-phosphate synthase     | AM+K_not_in_group |
| Medtr6g085050   | p protease adaptor protein ClpS    | AM+K_not_in_group |
| Medtr1g013820   | chorismate mutase                  | AM+K_not_in_group |
| Medtr4g115420   | embly plant-like protein, putative | AM+K_not_in_group |
| Medtr4g116220   | hypothetical protein               | AM+K_not_in_group |
| Medtr5g033920   | ate synthase alpha chain protein   | AM+K_not_in_group |
| Medtr5g063200   | εat thioredoxin TTL3-like protein  | AM+K_not_in_group |
| Medtr5g092160   | transmembrane protein 14C          | AM+K_not_in_group |
| Medtr8g031910   | )-binding rossmann-fold protein    | AM+K_not_in_group |
| Medtr8g076820   | peroxidase family protein          | AM+K_not_in_group |
| Medtr7g056413   | hypothetical protein               | AM+K_not_in_group |
| Medtr2g095510   | umarate:CoA ligase-like protein    | AM+K_not_in_group |

## diffusion\_prioritization\_ALL

|                |                                      |                   |
|----------------|--------------------------------------|-------------------|
| Medtr4g089085  | splicing factor 3B subunit 2         | AM+K_not_in_group |
| Medtr4g080120  | 50S ribosomal protein L1p            | AM+K_not_in_group |
| Medtr6g043240  | peroxidase family protein            | AM+K_not_in_group |
| Medtr4g081640  | ocus lectin kinase family protein    | AM+K_not_in_group |
| Medtr2g014250  | hypothetical protein                 | AM+K_not_in_group |
| Medtr2g019630  | ntapeptide-transferase, putative     | AM+K_not_in_group |
| Medtr5g046620  | pyruvate decarboxylase               | AM+K_not_in_group |
| Medtr6g004020  | pyruvate kinase family protein       | AM+K_not_in_group |
| Medtr6g078250  | : type trypsin inhibitor / miraculin | AM+K_not_in_group |
| Medtr6g078260  | : type trypsin inhibitor / miraculin | AM+K_not_in_group |
| Medtr6g078280  | : type trypsin inhibitor / miraculin | AM+K_not_in_group |
| Medtr7g074730  | flavonol 4-reductase-like protein    | AM+K_not_in_group |
| Medtr8g466220  | polygalacturonase inhibitor          | AM+K_not_in_group |
| Medtr3g011460  | main disease resistance protein      | AM+K_not_in_group |
| Medtr7g081500  | subtilisin-like serine protease      | AM+K_not_in_group |
| Medtr1g079810  | notif DNA-binding family protein     | AM+K_not_in_group |
| Medtr2g029800  | peroxidase family protein            | AM+K_not_in_group |
| Medtr3g056610  | main disease resistance protein      | AM+K_not_in_group |
| Medtr4g021270  | onal regulator superman protein      | AM+K_not_in_group |
| Medtr5g022970  | hypothetical protein                 | AM+K_not_in_group |
| Medtr5g098170  | :affeic acid O-methyltransferase     | AM+K_not_in_group |
| Medtr6g087150  | RING-H2 finger protein ATL4J         | AM+K_not_in_group |
| Medtr8g012180  | œ protein (TIR-NBS-LRR class)        | AM+K_not_in_group |
| Medtr8g023060  | tubby C 2 protein                    | AM+K_not_in_group |
| Medtr8g036060  | notif DNA-binding family protein     | AM+K_not_in_group |
| Medtr8g090275  | MFS transporter                      | AM+K_not_in_group |
| Medtr2g009620  | λ-type inclusion protein, putative   | AM+K_not_in_group |
| Medtr7g092050  | tor-like Serine/Threonine-kinase     | AM+K_not_in_group |
| Medtr2g095920  | œceptor Serine/Threonine kinase      | AM+K_not_in_group |
| Medtr4g104020  | GRAS family transcription factor     | AM+K_not_in_group |
| Medtr5g075520  | hypothetical protein                 | AM+K_not_in_group |
| Medtr0121s0010 | ransmembrane protein, putative       | AM+K_not_in_group |
| Medtr1g024095  | filament-plant-like protein          | AM+K_not_in_group |
| Medtr2g014770  | auxin response factor 3              | AM+K_not_in_group |
| Medtr3g073620  | heavy chain-like protein, putative   | AM+K_not_in_group |
| Medtr7g102070  | ABC transporter B family protein     | AM+K_not_in_group |
| Medtr5g033510  | an aminotransferase-like protein     | AM+K_not_in_group |
| Medtr1g087540  | nyb transcription factor, putative   | AM+K_not_in_group |
| Medtr3g095250  | ONA-binding protein alba protein     | AM+K_not_in_group |
| Medtr7g062140  | )-binding rossmann-fold protein      | AM+K_not_in_group |
| Medtr2g069400  | module stress tolerance protein      | AM+K_not_in_group |
| Medtr4g105690  | il 1,3,4-trisphosphate 5/6-kinase    | AM+K_in_group     |
| Medtr3g091560  | calmodulin-binding motif protein     | AM+K_not_in_group |
| Medtr3g098840  | DHHC type zinc finger protein        | AM+K_not_in_group |
| Medtr1g027820  | receptor-like kinase                 | AM+K_not_in_group |
| Medtr4g081420  | C2H2-like zinc finger protein        | AM+K_not_in_group |
| Medtr7g105730  | hypothetical protein                 | AM+K_not_in_group |
| Medtr4g006830  | 30e/S12e/Gadd45 family protein       | AM+K_not_in_group |
| Medtr8g028125  | 60S ribosomal protein L5-2           | AM+K_not_in_group |
| Medtr8g046140  | 50S ribosomal protein L5P            | AM+K_not_in_group |
| Medtr8g093770  | 30e/S12e/Gadd45 family protein       | AM+K_not_in_group |

diffusion\_prioritization\_ALL

|                 |                                        |                   |
|-----------------|----------------------------------------|-------------------|
| Medtr8g098850   | plectin/S10 domain protein             | AM+K_not_in_group |
| Medtr8g105110   | 40S ribosomal protein S15-4            | AM+K_not_in_group |
| Medtr8g105340   | 40S ribosomal protein S2-4             | AM+K_not_in_group |
| Medtr4g079830   | agenet domain protein                  | AM+K_not_in_group |
| Medtr1g086330   | ransmembrane protein, putative         | AM+K_not_in_group |
| Medtr1g102220   | cytochrome P450 family protein         | AM+K_not_in_group |
| Medtr2g059460   | aspartyl protease family protein       | AM+K_not_in_group |
| Medtr2g081860   | -3-acetic acid-amido synthetase        | AM+K_not_in_group |
| Medtr3g005530   | MADS-box transcription factor          | AM+K_not_in_group |
| Medtr3g005935   | hypothetical protein                   | AM+K_not_in_group |
| Medtr3g018780   | annexin D8                             | AM+K_not_in_group |
| Medtr4g028190   | Lipid transfer protein                 | AM+K_not_in_group |
| Medtr4g052350   | chain dehydrogenase/reductase          | AM+K_not_in_group |
| Medtr4g068310_s | main protein (other strand read)       | AM+K_not_in_group |
| Medtr4g100840   | IA-like transporter family protein     | AM+K_not_in_group |
| Medtr5g093500   | ransmembrane protein, putative         | AM+K_not_in_group |
| Medtr6g027440   | peroxidase family protein              | AM+K_not_in_group |
| Medtr8g087860   | MADS-box transcription factor          | AM+K_not_in_group |
| Medtr1g061160   | ne production factor-like protein      | AM+K_not_in_group |
| Medtr8g091410   | ptidyl-prolyl cis-trans isomerase      | AM+K_not_in_group |
| Medtr5g042420   | NAD(P)H dehydrogenase                  | AM+K_not_in_group |
| Medtr2g035150   | ase-resistance response protein        | AM+K_not_in_group |
| Medtr2g006290   | S ferredoxin superfamily protein       | AM+K_not_in_group |
| Medtr2g089510   | 6-F complex iron-sulfur subunit        | AM+K_not_in_group |
| Medtr3g010000   | stem I reaction center subunit V       | AM+K_not_in_group |
| Medtr3g115920   | 3-phosphate dehydrogenase B            | AM+K_not_in_group |
| Medtr3g118430   | rase/dehydratase family protein        | AM+K_not_in_group |
| Medtr4g019150   | UL heme-binding family protein         | AM+K_not_in_group |
| Medtr5g008050   | rubredoxin family protein              | AM+K_not_in_group |
| Medtr5g022300   | leaf ferredoxin-NADP reductase         | AM+K_not_in_group |
| Medtr7g088340   | in IX monomethyl ester cyclase         | AM+K_not_in_group |
| Medtr8g101550   | phospholipase A2 family protein        | AM+K_not_in_group |
| Medtr0024s0260  | S54 family peptidase                   | AM+K_not_in_group |
| Medtr0172s0030  | RNA polymerase sigma factor            | AM+K_not_in_group |
| Medtr3g091820   | nger DNA-binding family protein        | AM+K_not_in_group |
| Medtr8g461390   | UL heme-binding family protein         | AM+K_not_in_group |
| Medtr8g097350   | myosin heavy chain-like protein        | AM+K_not_in_group |
| Medtr7g032240   | CCT motif protein                      | AM+K_not_in_group |
| Medtr8g103480   | PR containing plant-like protein       | AM+K_not_in_group |
| Medtr1g040435   | helix loop helix protein, putative     | AM+K_not_in_group |
| Medtr1g082360   | glycerate mutase family protein        | AM+K_not_in_group |
| Medtr7g063950   | ransmembrane protein, putative         | AM+K_not_in_group |
| Medtr6g465290   | hypothetical protein                   | AM+K_not_in_group |
| Medtr7g056680   | tor-like Serine/Threonine-kinase       | AM+K_not_in_group |
| Medtr1g009760   | plasma membrane H <sup>+</sup> -ATPase | AM+K_not_in_group |
| Medtr2g025140   | ubiquinol oxidase                      | AM+K_not_in_group |
| Medtr1g086450   | hypothetical protein                   | AM+K_not_in_group |
| Medtr1g073700   | fatty-acyl-phospholipid synthase       | AM+K_in_group     |
| Medtr2g435590   | ethylene response factor               | AM+K_not_in_group |
| Medtr5g028020   | plant/F3C3-6 protein                   | AM+K_not_in_group |
| Medtr5g094160   | alponin-like (CH) domain protein       | AM+K_not_in_group |

diffusion\_prioritization\_ALL

|                |                                               |                   |
|----------------|-----------------------------------------------|-------------------|
| Medtr7g056613  | <sup>3</sup> PR containing plant-like protein | AM+K_not_in_group |
| Medtr4g080083  | RmlC-type cupin                               | AM+K_not_in_group |
| Medtr7g007120  | osphate carboxylase small chain               | AM+K_not_in_group |
| Medtr1g108700  | hypothetical protein                          | AM+K_not_in_group |
| Medtr4g044297  | plant/F9H3-4 protein                          | AM+K_not_in_group |
| Medtr6g069660  | osphate aldolase class-II protein             | AM+K_not_in_group |
| Medtr2g093220  | Dof domain zinc finger protein                | AM+K_not_in_group |
| Medtr3g048280  | trate-binding X8 domain protein               | AM+K_not_in_group |
| Medtr8g067590  | coprotein family protein, putative            | AM+K_not_in_group |
| Medtr1g116947  | ollen protein Ole E I-like protein            | AM+K_not_in_group |
| Medtr5g023030  | hypothetical protein                          | AM+K_not_in_group |
| Medtr0542s0020 | ransmembrane protein, putative                | AM+K_not_in_group |
| Medtr4g018750  | uncoupling protein                            | AM+K_not_in_group |
| Medtr7g096920  | UPF0420 C16orf58-like protein                 | AM+K_not_in_group |
| Medtr2g461180  | main kinase superfamily protein               | AM+K_not_in_group |
| Medtr8g089790  | 60S acidic ribosomal protein                  | AM+K_not_in_group |
| Medtr8g105890  | small nuclear ribonucleoprotein               | AM+K_not_in_group |
| Medtr4g007140  | D-PAGE of leaf protein, putative              | AM+K_not_in_group |
| Medtr3g082830  | GDSL-like lipase/acylhydrolase                | AM+K_not_in_group |
| Medtr4g028180  | Lipid transfer protein                        | AM+K_not_in_group |
| Medtr4g131830  | ochrome P450 family 87 protein                | AM+K_not_in_group |
| Medtr5g084330  | osin group485 secreted peptide                | AM+K_not_in_group |
| Medtr6g012360  | berellin-regulated family protein             | AM+K_not_in_group |
| Medtr8g031980  | ))-binding rossmann-fold protein              | AM+K_not_in_group |
| Medtr8g087890  | GDSL-like lipase/acylhydrolase                | AM+K_not_in_group |
| Medtr8g106210  | hypothetical protein                          | AM+K_not_in_group |
| Medtr2g436730  | n ABC transporter family protein              | AM+K_not_in_group |
| Medtr8g019650  | plant/MDC16-11 protein                        | AM+K_not_in_group |
| Medtr3g107393  | IDS4-like protein                             | AM+K_in_group     |
| Medtr1g069715  | cytochrome P450 family protein                | AM+K_not_in_group |
| Medtr2g009720  | ss I glutamine amidotransferase               | AM+K_not_in_group |
| Medtr1g012960  | ll knotted-like homeobox protein              | AM+K_not_in_group |
| Medtr2g064370  | plant/F3O9-12 protein                         | AM+K_not_in_group |
| Medtr5g029600  | hypothetical protein                          | AM+K_not_in_group |
| Medtr1g026820  | I reaction center subunit X psaK              | AM+K_not_in_group |
| Medtr4g117880  | -carboxylate oxidase-like protein             | AM+K_not_in_group |
| Medtr5g071190  | <sup>3</sup> PR containing plant-like protein | AM+K_not_in_group |
| Medtr1g052120  | ransmembrane protein, putative                | AM+K_not_in_group |
| Medtr1g061570  | auxin-responsive family protein               | AM+K_not_in_group |
| Medtr4g104660  | ochrome P450 family 71 protein                | AM+K_not_in_group |
| Medtr1g112780  | g oxidoreductase family protein               | AM+K_not_in_group |
| Medtr6g093060  | transducin/WD40 repeat protein                | AM+K_not_in_group |
| Medtr1g068970  | ort-chain dehydrogenase TIC 32                | AM+K_not_in_group |
| Medtr1g086600  | long-chain fatty acyl CoA ligase              | AM+K_not_in_group |
| Medtr4g047800  | omeobox leucine zipper protein                | AM+K_not_in_group |
| Medtr5g010070  | rring glycosyl group transferase              | AM+K_not_in_group |
| Medtr5g085730  | cosyl hydrolase family 9 protein              | AM+K_not_in_group |
| Medtr2g099810  | nal patterning factor-like protein            | AM+K_not_in_group |
| Medtr3g057910  | ochrome P450 family 71 protein                | AM+K_not_in_group |
| Medtr3g111190  | l-tRNA reductase family protein               | AM+K_not_in_group |
| Medtr6g011870  | I chlorophyll A/B-binding protein             | AM+K_not_in_group |

diffusion\_prioritization\_ALL

|                |                                   |                   |
|----------------|-----------------------------------|-------------------|
| Medtr7g015340  | RALF                              | AM+K_not_in_group |
| Medtr8g019440  | ankyrin repeat protein            | AM+K_not_in_group |
| Medtr8g075440  | ce protein (TIR-NBS-LRR class)    | AM+K_not_in_group |
| Medtr6g007607  | ptidyl-prolyl cis-trans isomerase | AM+K_not_in_group |
| Medtr8g100120  | oporphyrin IX methyltransferase   | AM+K_not_in_group |
| Medtr1g077690  | 60S ribosomal protein L6          | AM+K_not_in_group |
| Medtr3g032520  | ransmembrane protein, putative    | AM+K_not_in_group |
| Medtr4g081120  | ribosomal protein S13P/S18e       | AM+K_not_in_group |
| Medtr5g095530  | rane translocase subunit TIM50    | AM+K_not_in_group |
| Medtr8g093680  | 30S ribosomal protein S5          | AM+K_not_in_group |
| Medtr7g095930  | ransmembrane protein, putative    | AM+K_not_in_group |
| Medtr0015s0130 | actin-97                          | AM+K_not_in_group |
| Medtr1g088260  | DUF538 family protein             | AM+K_not_in_group |
| Medtr3g114670  | 4-hydroxylase alpha-like protein  | AM+K_not_in_group |
| Medtr4g050050  | plant/T7A14-6 protein             | AM+K_not_in_group |
| Medtr4g063830  | otein ligase XBAT31-like protein  | AM+K_not_in_group |
| Medtr7g077890  | 346000) TAIR;Acc:AT2G46000]       | AM+K_not_in_group |
| Medtr7g103070  | RAB GTPase-like protein C2B       | AM+K_not_in_group |
| Medtr7g111780  | GDSL-like lipase/acylhydrolase    | AM+K_not_in_group |
| Medtr7g116300  | C-Myc-binding-like protein        | AM+K_not_in_group |
| Medtr8g099300  | chome birefringence-like protein  | AM+K_not_in_group |
| Medtr5g099240  | lin-domain kinase CDPK protein    | AM+K_not_in_group |
| Medtr5g082700  | hreonine kinase domain protein    | AM+K_not_in_group |
| Medtr5g027980  | icopeptide (PPR) repeat protein   | AM+K_not_in_group |
| Medtr2g017750  | peptide/nitrate transporter       | AM+K_not_in_group |
| Medtr2g104790  | receptor-like kinase              | AM+K_not_in_group |
| Medtr2g103307  | embryo-specific protein           | AM+K_not_in_group |
| Medtr4g082365  | ransmembrane protein, putative    | AM+K_not_in_group |
| Medtr5g032465  | ile-specific Glycine Rich Peptide | AM+K_not_in_group |
| Medtr5g063520  | ne-Rich (NCR) secreted peptide    | AM+K_not_in_group |
| Medtr5g072455  | ne-Rich (NCR) secreted peptide    | AM+K_not_in_group |
| Medtr5g072456  | ne-Rich (NCR) secreted peptide    | AM+K_not_in_group |
| Medtr7g077050  | Ripening related protein family   | AM+K_not_in_group |
| Medtr7g102460  | ucosyltransferase family protein  | AM+K_not_in_group |
| Medtr8g036050  | -tetrahydrodipicolinate synthase  | AM+K_not_in_group |
| Medtr3g079620  | ie carboxypeptidase-like protein  | AM+K_not_in_group |
| Medtr5g019460  | geranyl pyrophosphate synthase    | AM+K_not_in_group |
| Medtr5g044250  | ransmembrane protein, putative    | AM+K_not_in_group |
| Medtr6g051680  | netal-associated domain protein   | AM+K_in_group     |
| Medtr8g068340  | ucosyltransferase family protein  | AM+K_not_in_group |
| Medtr2g103410  | polygalacturonase                 | AM+K_not_in_group |
| Medtr3g101300  | omain TIGR01570 family protein    | AM+K_not_in_group |
| Medtr8g076040  | auxin-responsive family protein   | AM+K_not_in_group |
| Medtr3g114010  | DUF668 family protein             | AM+K_not_in_group |
| Medtr3g005210  | cohol dehydrogenase-like protein  | AM+K_not_in_group |
| Medtr5g080400  | leghemoglobin Lb120-1             | AM+K_not_in_group |
| Medtr2g039235  | ile-specific Glycine Rich Peptide | AM+K_not_in_group |
| Medtr2g020820  | hypothetical protein              | AM+K_not_in_group |
| Medtr2g095390  | x ABC transporter family protein  | AM+K_not_in_group |
| Medtr8g030700  | U-box protein, putative           | AM+K_not_in_group |
| Medtr1g081000  | Serine/Threonine-kinase Nek4      | AM+K_not_in_group |



diffusion\_prioritization\_ALL

|                                                            |                   |
|------------------------------------------------------------|-------------------|
| Medtr6g015950 xygenase family oxidoreductase               | AM+K_not_in_group |
| Medtr0012s0290 (TIR-NBS-LRR class), putative               | AM+K_not_in_group |
| Medtr1g043170 ox/RNI/FBD-like domain protein               | AM+K_not_in_group |
| Medtr1g069610_s etical protein (other strand read)         | AM+K_not_in_group |
| Medtr3g094070_s iding protein (other strand read)          | AM+K_not_in_group |
| Medtr5g009020_s iting enzyme (other strand read)           | AM+K_not_in_group |
| Medtr8g070530 phototropin-2 protein                        | AM+K_not_in_group |
| Medtr2g436510 atase pleiotropic regulator PRL1             | AM+K_not_in_group |
| Medtr1g064260 hosphate phosphoribohydrolase                | AM+K_not_in_group |
| Medtr3g466150 ption factor bHLH93-like protein             | AM+K_not_in_group |
| Medtr4g127000 hypothetical protein                         | AM+K_not_in_group |
| Medtr8g083280 flavonoid glucosyltransferase                | AM+K_not_in_group |
| Medtr6g074160 hypothetical protein                         | AM+K_not_in_group |
| Medtr1g050750 DNA-binding protein                          | AM+K_not_in_group |
| Medtr3g088605 id transcriptionally active protein          | AM+K_not_in_group |
| Medtr1g042700 AGC kinase                                   | AM+K_not_in_group |
| Medtr3g460810 lectin receptor kinase                       | AM+K_not_in_group |
| Medtr5g027030 growth-regulating factor                     | AM+K_not_in_group |
| Medtr4g017620 phloem filament protein PP1                  | AM+K_not_in_group |
| Medtr5g094780 ransmembrane protein, putative               | AM+K_not_in_group |
| Medtr0227s0020 60S acidic ribosomal protein                | AM+K_not_in_group |
| Medtr1g009010 ise regulatory subunit-like protein          | AM+K_not_in_group |
| Medtr1g018710 <sup>P1</sup> attachment factor-like protein | AM+K_not_in_group |
| Medtr1g045410 60S ribosomal L4-like protein                | AM+K_not_in_group |
| Medtr1g061240 sterol C-14 reductase                        | AM+K_not_in_group |
| Medtr1g083960 calreticulin                                 | AM+K_not_in_group |
| Medtr1g100673 yadenylation specificity factor 5            | AM+K_not_in_group |
| Medtr2g014220 60S ribosomal protein L15-1                  | AM+K_not_in_group |
| Medtr2g014370 hypothetical protein                         | AM+K_not_in_group |
| Medtr2g018680 60S ribosomal protein L38A                   | AM+K_not_in_group |
| Medtr2g019670 ribosomal protein S11                        | AM+K_not_in_group |
| Medtr2g035930 60S ribosomal protein L27-1                  | AM+K_not_in_group |
| Medtr2g038250 60S ribosomal protein L7                     | AM+K_not_in_group |
| Medtr3g023120 xinst apoptotic death-like protein           | AM+K_not_in_group |
| Medtr3g054090 ansducin/WD-like repeat-protein              | AM+K_not_in_group |
| Medtr3g077640 plastid phosphate translocator               | AM+K_not_in_group |
| Medtr3g092130 OS ribosomal L40 fusion protein              | AM+K_not_in_group |
| Medtr3g093220 F-H domain/band 7 family protein             | AM+K_not_in_group |
| Medtr3g115880 canopy-like protein                          | AM+K_not_in_group |
| Medtr4g011000 alba DNA/RNA-binding protein                 | AM+K_not_in_group |
| Medtr4g068710 eptor subunit TOM6-like protein              | AM+K_not_in_group |
| Medtr4g069240 transferase 48 kDa subunit beta              | AM+K_not_in_group |
| Medtr4g071150 ProtKB/Swiss-Prot;Acc:Q1S053]                | AM+K_not_in_group |
| Medtr4g075340 associated protein alpha subunit             | AM+K_not_in_group |
| Medtr4g078200 prohibitin complex protein                   | AM+K_not_in_group |
| Medtr4g102170 toplasmic ribosomal protein S13              | AM+K_not_in_group |
| Medtr4g116080 hypothetical protein                         | AM+K_not_in_group |
| Medtr4g116410 40S ribosomal protein S11-1                  | AM+K_not_in_group |
| Medtr4g124640 tion initiation factor 3 subunit 12          | AM+K_not_in_group |
| Medtr5g011910 toplasmic ribosomal protein S13              | AM+K_not_in_group |
| Medtr5g024680 ransmembrane protein, putative               | AM+K_not_in_group |

diffusion\_prioritization\_ALL

|                                                      |                   |
|------------------------------------------------------|-------------------|
| Medtr5g082180)S acidic ribosomal protein P0-1        | AM+K_not_in_group |
| Medtr5g083790 60S ribosomal protein L13a-4           | AM+K_not_in_group |
| Medtr5g097200 40S ribosomal S26-like protein         | AM+K_not_in_group |
| Medtr6g011390) anion-selective channel protein       | AM+K_not_in_group |
| Medtr6g021670 40S ribosomal S7-like protein          | AM+K_not_in_group |
| Medtr6g021740)PR containing plant-like protein       | AM+K_not_in_group |
| Medtr6g024140 import receptor subunit TOM20          | AM+K_not_in_group |
| Medtr7g023260 60S ribosomal protein L23a-2           | AM+K_not_in_group |
| Medtr7g099610 histone H4 domain protein              | AM+K_not_in_group |
| Medtr7g107400 40S ribosomal SA-like protein          | AM+K_not_in_group |
| Medtr7g107420 60S ribosomal L21-like protein         | AM+K_not_in_group |
| Medtr7g108320 histone H2A 6                          | AM+K_not_in_group |
| Medtr7g112770 ribosomal L22e family protein          | AM+K_not_in_group |
| Medtr8g015570 60S ribosomal L28-like protein         | AM+K_not_in_group |
| Medtr8g028145 dihydrodipicolinate reductase          | AM+K_not_in_group |
| Medtr8g097160) primase large subunit, putative       | AM+K_not_in_group |
| Medtr8g089980)))-methyltransferase-like protein      | AM+K_not_in_group |
| Medtr5g042320)mp24/gp25L/p24 family protein          | AM+K_not_in_group |
| Medtr1g012520 EIN3-binding F-box-like protein        | AM+K_not_in_group |
| Medtr7g037690)ne-Rich (NCR) secreted peptide         | AM+K_not_in_group |
| Medtr3g089125 bidirectional sugar transporter        | AM+K_not_in_group |
| Medtr2g437910 vacuolar-sorting receptor              | AM+K_not_in_group |
| Medtr4g037655)_s=-like protein (other strand read)   | AM+K_not_in_group |
| Medtr4g104730)_s= transporter (other strand read)    | AM+K_not_in_group |
| Medtr5g020800)soflavone reductase-like protein       | AM+K_not_in_group |
| Medtr5g056395)_stein, putative (other strand read)   | AM+K_not_in_group |
| Medtr6g007763)len-inducible alpha-dioxygenase        | AM+K_not_in_group |
| Medtr7g028975)ransmembrane protein, putative         | AM+K_not_in_group |
| Medtr2g100280)RNA exonuclease-like protein           | AM+K_not_in_group |
| Medtr1g064490)ransmembrane protein, putative         | AM+K_not_in_group |
| Medtr2g007770)er of Y14-mago protein, putative       | AM+K_not_in_group |
| Medtr2g038410)-sugar transporter family protein      | AM+K_not_in_group |
| Medtr3g017440)ive oxygen species modulator 1         | AM+K_not_in_group |
| Medtr3g031800)ucible lysosomal thiol reductase       | AM+K_not_in_group |
| Medtr4g053410) methyltransferase type 11             | AM+K_not_in_group |
| Medtr5g072620)moyl-CoA reductase-like protein        | AM+K_not_in_group |
| Medtr7g081200)ptidyl-prolyl cis-trans isomerase      | AM+K_not_in_group |
| Medtr7g107050)te dehydrogenase (cytochrome)          | AM+K_not_in_group |
| Medtr7g115440)biubiquitination effector-like protein | AM+K_not_in_group |
| Medtr8g043960) bZIP transcription factor             | AM+K_not_in_group |
| Medtr5g091680) MAP kinase-like protein               | AM+K_not_in_group |
| Medtr7g069970) hypothetical protein                  | AM+K_in_group     |
| Medtr4g051648) Serine/Threonine-kinase Nek4          | AM+K_not_in_group |
| Medtr7g073430) WRKY transcription factor             | AM+K_not_in_group |
| Medtr1g013730)ycoside hydrolase family protein       | AM+K_not_in_group |
| Medtr1g039040)binding factor HAP3-like protein       | AM+K_not_in_group |
| Medtr1g056240) hypothetical protein                  | AM+K_not_in_group |
| Medtr1g092740) GDSL-like lipase/acylhydrolase        | AM+K_not_in_group |
| Medtr1g108550) hypothetical protein                  | AM+K_not_in_group |
| Medtr2g014060) Dof domain zinc finger protein        | AM+K_not_in_group |
| Medtr2g020590)-xylulose-5-phosphate synthase         | AM+K_not_in_group |

## diffusion\_prioritization\_ALL

|               |                                      |                   |
|---------------|--------------------------------------|-------------------|
| Medtr2g033520 | desiccation PCC13-like protein       | AM+K_not_in_group |
| Medtr2g037320 | Defensin fusion                      | AM+K_not_in_group |
| Medtr2g037565 | Defensin fusion                      | AM+K_not_in_group |
| Medtr2g077035 | LCR-like protein                     | AM+K_not_in_group |
| Medtr4g029760 | itive proline-rich cell wall protein | AM+K_not_in_group |
| Medtr4g040310 | phloem filament protein PP1          | AM+K_not_in_group |
| Medtr4g072340 | papain family cysteine protease      | AM+K_not_in_group |
| Medtr4g087965 | peroxidase family protein            | AM+K_not_in_group |
| Medtr4g122890 | pectin methylesterase inhibitor      | AM+K_not_in_group |
| Medtr5g076340 | ubiquitin-60S ribosomal protein      | AM+K_not_in_group |
| Medtr5g088000 | early nodulin-like protein           | AM+K_not_in_group |
| Medtr6g026780 | osin group486 secreted peptide       | AM+K_not_in_group |
| Medtr6g086500 | ransmembrane protein, putative       | AM+K_not_in_group |
| Medtr7g025060 | ne-Rich (NCR) secreted peptide       | AM+K_not_in_group |
| Medtr7g077230 | Bowman birk trypsin inhibitor        | AM+K_not_in_group |
| Medtr7g083580 | Lipid transfer protein               | AM+K_not_in_group |
| Medtr7g088550 | pectin lyase superfamily protein     | AM+K_not_in_group |
| Medtr8g013730 | RALF-like protein                    | AM+K_not_in_group |
| Medtr8g013750 | RALF-like protein                    | AM+K_not_in_group |
| Medtr8g038280 | aspartyl protease family protein     | AM+K_not_in_group |
| Medtr8g040850 | DUF239 domain protein                | AM+K_not_in_group |
| Medtr8g463120 | LCR-like protein                     | AM+K_not_in_group |
| Medtr4g128820 | CBL-interacting kinase               | AM+K_not_in_group |
| Medtr1g081870 | cyclin-dependent kinase              | AM+K_not_in_group |
| Medtr1g031840 | hypothetical protein                 | AM+K_not_in_group |
| Medtr1g066770 | osphatase (PAP2) family protein      | AM+K_not_in_group |
| Medtr1g089850 | pse-associated protein, putative     | AM+K_not_in_group |
| Medtr2g005245 | hypothetical protein                 | AM+K_not_in_group |
| Medtr2g034020 | s amily protein (other strand read)  | AM+K_not_in_group |
| Medtr2g103690 | rin adaptor complex small chain      | AM+K_not_in_group |
| Medtr3g103970 | s ering protein (other strand read)  | AM+K_not_in_group |
| Medtr3g109330 | myosin heavy chain-like protein      | AM+K_not_in_group |
| Medtr4g056100 | -apiose/UDP-D-xylose synthase        | AM+K_not_in_group |
| Medtr4g072050 | ase 16 kDa proteolipid subunit 4     | AM+K_not_in_group |
| Medtr4g119860 | RALF                                 | AM+K_not_in_group |
| Medtr4g125660 | ta-hydrolase superfamily protein     | AM+K_not_in_group |
| Medtr5g030430 | s ription factor (other strand read) | AM+K_not_in_group |
| Medtr5g079870 | RNA recognition motif                | AM+K_not_in_group |
| Medtr6g018400 | s 3-like protein (other strand read) | AM+K_not_in_group |
| Medtr6g023230 | cytochrome c1, heme protein          | AM+K_not_in_group |
| Medtr7g011820 | s tion factor 3 (other strand read)  | AM+K_not_in_group |
| Medtr7g083790 | phosphate carrier protein            | AM+K_not_in_group |
| Medtr7g100370 | phosphatase LPIN3-like protein       | AM+K_not_in_group |
| Medtr7g103620 | phosphopyruvate hydratase            | AM+K_not_in_group |
| Medtr8g074590 | lated/COG complex component          | AM+K_not_in_group |
| Medtr8g074790 | RNA recognition motif                | AM+K_not_in_group |
| Medtr8g089310 | LSD1-type zinc finger protein        | AM+K_not_in_group |
| Medtr7g074070 | ransmembrane protein, putative       | AM+K_not_in_group |
| Medtr2g035220 | ABA-responsive protein               | AM+K_not_in_group |
| Medtr7g023730 | lygalacturonase inhibitor protein    | AM+K_not_in_group |
| Medtr7g023740 | polygalacturonase inhibitor          | AM+K_not_in_group |

## diffusion\_prioritization\_ALL

|                 |                                      |                   |
|-----------------|--------------------------------------|-------------------|
| Medtr7g090450   | id calcium-binding family protein    | AM+K_not_in_group |
| Medtr8g074880   | 4-hydroxylase alpha-like protein     | AM+K_not_in_group |
| Medtr1g009640_s | etical protein (other strand read)   | AM+K_not_in_group |
| Medtr1g019150   | polyadenylate-binding protein        | AM+K_not_in_group |
| Medtr1g061630   | pyruvate kinase family protein       | AM+K_not_in_group |
| Medtr1g076540   | pyruvate kinase family protein       | AM+K_not_in_group |
| Medtr1g114250   | charyltransferase subunit STT3       | AM+K_not_in_group |
| Medtr2g089340   | dihydroxyacid dehydratase            | AM+K_not_in_group |
| Medtr3g099190   | tate synthase 1 catalytic subunit    | AM+K_not_in_group |
| Medtr5g099180   | homoserine kinase                    | AM+K_not_in_group |
| Medtr8g088270   | cpn60 chaperonin family protein      | AM+K_not_in_group |
| Medtr0014s0440  | ysyltransferase family 90 protein    | AM+K_not_in_group |
| Medtr4g115930   | RING-H2 zinc finger protein          | AM+K_not_in_group |
| Medtr7g087400   | MATE efflux family protein           | AM+K_not_in_group |
| Medtr8g097320   | carboxy-terminal region remorin      | AM+K_not_in_group |
| Medtr1g084060   | homeobox knotted-like protein        | AM+K_not_in_group |
| Medtr1g056370   | ase resistance response protein      | AM+K_not_in_group |
| Medtr1g083290   | iratory burst oxidase-like protein   | AM+K_not_in_group |
| Medtr3g077870   | [ADP-ribose] polymerase SRO4         | AM+K_not_in_group |
| Medtr3g077870_s | erases SRO4 (other strand read)      | AM+K_not_in_group |
| Medtr4g012610   | hypothetical protein                 | AM+K_not_in_group |
| Medtr4g085880   | thioredoxin                          | AM+K_not_in_group |
| Medtr5g012390   | te dehydrogenase A-like protein      | AM+K_not_in_group |
| Medtr5g022390   | lanese-related sulfurtransferase     | AM+K_not_in_group |
| Medtr6g009440   | 4-hydroxylase alpha-like protein     | AM+K_not_in_group |
| Medtr6g089480   | pfkB family carbohydrate kinase      | AM+K_not_in_group |
| Medtr3g074450   | hypothetical protein                 | AM+K_not_in_group |
| Medtr8g071250   | isitive ion channel family protein   | AM+K_not_in_group |
| Medtr3g102170_s | l-like protein (other strand read)   | AM+K_not_in_group |
| Medtr3g117330_s | main protein (other strand read)     | AM+K_not_in_group |
| Medtr5g069710_s | actor MYB51 (other strand read)      | AM+K_not_in_group |
| Medtr5g091200   | triacylglycerol lipase               | AM+K_not_in_group |
| Medtr6g033165_s | r-like protein (other strand read)   | AM+K_not_in_group |
| Medtr7g061720_s | 1-like protein (other strand read)   | AM+K_not_in_group |
| Medtr7g092470_s | 3-like protein (other strand read)   | AM+K_not_in_group |
| Medtr8g072000   | ctinacetyltransferase family protein | AM+K_not_in_group |
| Medtr1g064500   | 60S ribosomal L12-like protein       | AM+K_not_in_group |
| Medtr6g059920   | -like cupins superfamily protein     | AM+K_not_in_group |
| Medtr8g063690   | AP-1 complex subunit gamma-2         | AM+K_not_in_group |
| Medtr0067s0100  | 3HC4 type (RING finger) protein      | AM+K_not_in_group |
| Medtr3g090540   | rcosyl hydrolase family 9 protein    | AM+K_not_in_group |
| Medtr1g017490   | growth-regulating factor             | AM+K_not_in_group |
| Medtr1g086990   | iotriesterase superfamily protein    | AM+K_not_in_group |
| Medtr3g069500   | peptide/nitrate transporter plant    | AM+K_not_in_group |
| Medtr7g108775   | DUF538 family protein                | AM+K_not_in_group |
| Medtr8g074890   | 4-hydroxylase alpha-like protein     | AM+K_not_in_group |
| Medtr3g082130   | receptor-like protein                | AM+K_not_in_group |
| Medtr5g035240   | main disease resistance protein      | AM+K_not_in_group |
| Medtr7g099100   | ial domain arginine-tRNA ligase      | AM+K_not_in_group |
| Medtr8g016960   | beta-amyrin synthase                 | AM+K_not_in_group |
| Medtr2g072510   | ranone isomerase family protein      | AM+K_not_in_group |

## diffusion\_prioritization\_ALL

|               |                                           |                   |
|---------------|-------------------------------------------|-------------------|
| Medtr3g085660 | ig oxidoreductase family protein          | AM+K_not_in_group |
| Medtr4g018900 | hypothetical protein                      | AM+K_not_in_group |
| Medtr7g101190 | protein (MIP) family transporter          | AM+K_in_group     |
| Medtr5g022580 | 3-dehydroquinate synthase                 | AM+K_not_in_group |
| Medtr8g442510 | ne-Rich (NCR) secreted peptide            | AM+K_not_in_group |
| Medtr5g033820 | LRR receptor-like kinase                  | AM+K_not_in_group |
| Medtr8g095390 | myb transcription factor                  | AM+K_not_in_group |
| Medtr6g052340 | DNA primase                               | AM+K_not_in_group |
| Medtr2g048900 | doplasmic oxidoreductin protein           | AM+K_not_in_group |
| Medtr4g077930 | ABC transporter B family protein          | AM+K_not_in_group |
| Medtr5g034500 | potassium transporter-like protein        | AM+K_not_in_group |
| Medtr4g131180 | de-3-phosphate dehydrogenase              | AM+K_in_group     |
| Medtr3g102670 | lipase                                    | AM+K_not_in_group |
| Medtr4g120950 | ProtKB/Swiss-Prot;Acc:P93330]             | AM+K_not_in_group |
| Medtr5g037270 | plant/F14N23-31 protein                   | AM+K_not_in_group |
| Medtr6g005630 | polygalacturonase                         | AM+K_not_in_group |
| Medtr7g061018 | metallothionein                           | AM+K_not_in_group |
| Medtr8g023270 | transmembrane protein, putative           | AM+K_not_in_group |
| Medtr8g073250 | Threonine kinase family protein           | AM+K_not_in_group |
| Medtr8g023560 | ubiquitin-like receptor family 6 protein  | AM+K_not_in_group |
| Medtr1g081240 | pollen-specific SF21-like protein         | AM+K_not_in_group |
| Medtr1g087270 | cytokeratin amino-terminal domain protein | AM+K_not_in_group |
| Medtr3g084510 | LRR receptor-like kinase                  | AM+K_not_in_group |
| Medtr3g110600 | ergosterol biosynthetic-like protein      | AM+K_not_in_group |
| Medtr4g095280 | hypothetical protein                      | AM+K_not_in_group |
| Medtr5g043190 | DUF538 family protein                     | AM+K_not_in_group |
| Medtr5g082470 | checkstrin-like (PH) domain protein       | AM+K_not_in_group |
| Medtr7g093260 | actin-97                                  | AM+K_not_in_group |
| Medtr8g007380 | cyclin p4                                 | AM+K_not_in_group |
| Medtr8g064180 | amylase/hydrolase family protein          | AM+K_not_in_group |
| Medtr4g094595 | starch synthase IV                        | AM+K_not_in_group |
| Medtr1g111590 | pectate lyase family protein              | AM+K_not_in_group |
| Medtr2g031610 | inulin transfer family protein            | AM+K_not_in_group |
| Medtr4g014700 | reticulon-like protein B2                 | AM+K_not_in_group |
| Medtr4g081560 | DUF538 family protein                     | AM+K_not_in_group |
| Medtr8g020920 | receptor-like kinase                      | AM+K_not_in_group |
| Medtr2g009220 | oxoglutarate/malate translocator          | AM+K_in_group     |
| Medtr2g460800 | reticulon-like protein B2                 | AM+K_not_in_group |
| Medtr4g105370 | receptor-like kinase family protein       | AM+K_not_in_group |
| Medtr7g059290 | pectate lyase-like protein                | AM+K_not_in_group |
| Medtr8g043970 | ProtKB/Swiss-Prot;Acc:Q6RET7]             | AM+K_not_in_group |
| Medtr8g046300 | prohibitin complex protein                | AM+K_not_in_group |
| Medtr5g005120 | mitotic checkpoint protein BUB3           | AM+K_not_in_group |
| Medtr8g056890 | Defensin-like protein                     | AM+K_not_in_group |
| Medtr2g020760 | preferring nucleoside hydrolase           | AM+K_not_in_group |
| Medtr3g031340 | ne-Rich (NCR) secreted peptide            | AM+K_not_in_group |
| Medtr8g055970 | hypothetical protein                      | AM+K_not_in_group |
| Medtr8g103740 | phospholipid biosynthesis protein         | AM+K_not_in_group |
| Medtr7g076740 | transcription factor MIXTA-like protein   | AM+K_not_in_group |
| Medtr5g017290 | carboxy-terminal region remorin           | AM+K_in_group     |
| Medtr1g010290 | myb-like transcription factor protein     | AM+K_not_in_group |

diffusion\_prioritization\_ALL

|               |                                                            |                   |
|---------------|------------------------------------------------------------|-------------------|
| Medtr1g078040 | nucleoporin autopeptidase                                  | AM+K_not_in_group |
| Medtr1g108690 | ALG2-interacting protein X                                 | AM+K_not_in_group |
| Medtr2g104400 | transcription cofactor, putative                           | AM+K_not_in_group |
| Medtr2g104430 | transcription cofactor, putative                           | AM+K_not_in_group |
| Medtr3g073320 | C2H2-type zinc-finger-like domain protein                  | AM+K_not_in_group |
| Medtr4g133170 | SH2 domain interaction domain protein                      | AM+K_not_in_group |
| Medtr5g093940 | PHD-finger protein                                         | AM+K_not_in_group |
| Medtr7g099890 | annel regulatory protein UNC-93                            | AM+K_not_in_group |
| Medtr8g038550 | circadian time control FY-like protein                     | AM+K_not_in_group |
| Medtr8g099415 | F-box/LRR protein, putative                                | AM+K_not_in_group |
| Medtr2g028220 | DUF566 family protein                                      | AM+K_not_in_group |
| Medtr4g050060 | condensin complex subunit 2                                | AM+K_not_in_group |
| Medtr4g054980 | serine epsilon catalytic subunit A                         | AM+K_not_in_group |
| Medtr5g029890 | NARE associated family protein                             | AM+K_not_in_group |
| Medtr2g025080 | RING/U-box protein, putative                               | AM+K_in_group     |
| Medtr3g071740 | phosphatidylethanolamine dehydratase and lipid transporter | AM+K_not_in_group |
| Medtr1g031540 | receptor-like kinase                                       | AM+K_not_in_group |
| Medtr8g070095 | glutathione reductase family oxidoreductase                | AM+K_not_in_group |
| Medtr3g095410 | phosphatase or nucleoside diphosphate lyase                | AM+K_not_in_group |
| Medtr1g045750 | phosphatase dehydratase, large subunit                     | AM+K_not_in_group |
| Medtr1g102680 | protein with YGL and LRDR motif                            | AM+K_not_in_group |
| Medtr2g072830 | phosphatase family carbohydrate kinase                     | AM+K_not_in_group |
| Medtr3g108630 | transmembrane protein, putative                            | AM+K_not_in_group |
| Medtr3g111310 | phosphatase family protein                                 | AM+K_not_in_group |
| Medtr6g033010 | protein (MIP) family transporter                           | AM+K_not_in_group |
| Medtr7g016670 | phosphatase tetrahydrofolate deformylase                   | AM+K_not_in_group |
| Medtr7g104570 | quinol-cytochrome C reductase                              | AM+K_not_in_group |
| Medtr3g008250 | prohibitin complex protein                                 | AM+K_not_in_group |
| Medtr7g406870 | cpn60 chaperonin family protein                            | AM+K_not_in_group |
| Medtr6g005210 | MAP kinase kinase                                          | AM+K_not_in_group |
| Medtr2g068760 | LOB domain protein                                         | AM+K_not_in_group |
| Medtr4g101830 | nucleoside diphosphate hydrolase-like protein              | AM+K_not_in_group |
| Medtr8g467170 | neurotrophin-binding protein (NCR) secreted peptide        | AM+K_not_in_group |
| Medtr5g022960 | 4-hydroxylase alpha-like protein                           | AM+K_not_in_group |
| Medtr5g067150 | CBL-interacting kinase                                     | AM+K_not_in_group |
| Medtr8g043760 | SWIM zinc finger protein                                   | AM+K_not_in_group |
| Medtr5g094380 | tyrosine kinase family protein                             | AM+K_not_in_group |
| Medtr1g017080 | homeobox knotted-like protein                              | AM+K_not_in_group |
| Medtr4g035200 | receptor-like kinase family protein                        | AM+K_not_in_group |
| Medtr7g065050 | BEL1-like homeodomain protein                              | AM+K_not_in_group |
| Medtr7g111260 | peptide/nitrate transporter                                | AM+K_not_in_group |
| Medtr1g067000 | myb transcription factor                                   | AM+K_not_in_group |
| Medtr4g070660 | transmembrane protein, putative                            | AM+K_not_in_group |
| Medtr4g131400 | temperature-induced lipocalin                              | AM+K_not_in_group |
| Medtr5g084470 | hypothetical protein                                       | AM+K_not_in_group |
| Medtr7g010950 | finger DNA-binding family protein                          | AM+K_not_in_group |
| Medtr7g106320 | BEL1-related homeotic protein                              | AM+K_not_in_group |
| Medtr8g009980 | trans-alkene double bond reductase                         | AM+K_not_in_group |
| Medtr5g043830 | cytochrome c gene family member MtCLE16                    | AM+K_not_in_group |
| Medtr7g114590 | rubredoxin-like protein                                    | AM+K_not_in_group |
| Medtr1g045140 | proton gradient regulation protein                         | AM+K_not_in_group |

## diffusion\_prioritization\_ALL

|                                                   |                   |
|---------------------------------------------------|-------------------|
| Medtr1g090973 gume lectin beta domain protein     | AM+K_not_in_group |
| Medtr1g115210 ise in GUARD CELL-like protein      | AM+K_not_in_group |
| Medtr2g048720 inositol transporter 4              | AM+K_not_in_group |
| Medtr3g089055 GRAS family transcription factor    | AM+K_not_in_group |
| Medtr3g099200 hypothetical protein                | AM+K_not_in_group |
| Medtr4g112460 id calcium-binding family protein   | AM+K_not_in_group |
| Medtr4g112890 hypothetical protein                | AM+K_not_in_group |
| Medtr5g008060 rring glycosyl group transferase    | AM+K_not_in_group |
| Medtr5g026850 cyclops protein, putative           | AM+K_not_in_group |
| Medtr8g062790 acid hydrolase ILR1-like protein    | AM+K_not_in_group |
| Medtr8g077590 amily protein (other strand read)   | AM+K_not_in_group |
| Medtr1g054965 carotenoid isomerase                | AM+K_not_in_group |
| Medtr1g081290 zeta-carotene desaturase            | AM+K_in_group     |
| Medtr1g471050 beta-carotene isomerase D27         | AM+K_not_in_group |
| Medtr4g106870 5-phosphate reductoisomerase        | AM+K_not_in_group |
| Medtr8g097190 15-cis-zeta-carotene isomerase      | AM+K_not_in_group |
| Medtr3g093430 ABC transporter B family protein    | AM+K_not_in_group |
| Medtr5g084133 yline Rich Peptide MtNodGRP1E       | AM+K_not_in_group |
| Medtr4g106980 ireonine-kinase HT1-like protein    | AM+K_not_in_group |
| Medtr2g044100 GDSL-like lipase/acylhydrolase      | AM+K_not_in_group |
| Medtr3g011630 tyrosine kinase family protein      | AM+K_not_in_group |
| Medtr3g107810 specific tissue protein             | AM+K_not_in_group |
| Medtr3g008960 xoside hydrolase family 5 protein   | AM+K_not_in_group |
| Medtr3g058110 ochrome P450 family 71 protein      | AM+K_not_in_group |
| Medtr8g080150 droxyl-kinase NOL9-like protein     | AM+K_not_in_group |
| Medtr1g069780 transferase subunit ribophorin II   | AM+K_not_in_group |
| Medtr2g103330 embryo-specific protein             | AM+K_not_in_group |
| Medtr7g065770 early nodulin ENOD18                | AM+K_not_in_group |
| Medtr8g039130 ene-Rich (NCR) secreted peptide     | AM+K_not_in_group |
| Medtr1g088150 ransmembrane protein, putative      | AM+K_not_in_group |
| Medtr1g099190 1/RBD/RNP motif) family protein     | AM+K_not_in_group |
| Medtr5g069030 2 transcription factor-like protein | AM+K_not_in_group |
| Medtr8g089360 rino acid transporter-like protein  | AM+K_not_in_group |
| Medtr2g093280 phosphate synthase large chain      | AM+K_not_in_group |
| Medtr4g086150 longevity assurance-like protein    | AM+K_not_in_group |
| Medtr2g017920 transmembrane-like protein          | AM+K_not_in_group |
| Medtr2g075780 gamma-glutamylhydrolase             | AM+K_not_in_group |
| Medtr4g074600 DHC-type zinc finger protein        | AM+K_not_in_group |
| Medtr7g113970 rter (SP) family MFS transporter    | AM+K_not_in_group |
| Medtr7g112700 in-capping protein subunit alpha    | AM+K_not_in_group |
| Medtr8g083220 subtilisin-like serine protease     | AM+K_not_in_group |
| Medtr5g019070 LRR receptor-like kinase            | AM+K_not_in_group |
| Medtr1g013450 zinc finger constans-like protein   | AM+K_not_in_group |
| Medtr3g088120 replication factor C subunit 5      | AM+K_not_in_group |
| Medtr7g088620 inding protein of 25 kDa protein    | AM+K_not_in_group |
| Medtr8g028880 receptor-like cytoplasmic kinase    | AM+K_not_in_group |
| Medtr1g100120 transmembrane protein               | AM+K_not_in_group |
| Medtr3g078570 -1-phosphate guanyltransferase      | AM+K_not_in_group |
| Medtr7g065920 G/FYVE/PHD zinc finger protein      | AM+K_not_in_group |
| Medtr7g072560 saposin B domain protein            | AM+K_not_in_group |
| Medtr8g014360 sporter-like ABC domain protein     | AM+K_not_in_group |

diffusion\_prioritization\_ALL

|               |                                     |                   |
|---------------|-------------------------------------|-------------------|
| Medtr1g101500 | MATE efflux family protein          | AM+K_not_in_group |
| Medtr2g027800 | ranscription factor family protein  | AM+K_not_in_group |
| Medtr4g111870 | hypothetical protein                | AM+K_not_in_group |
| Medtr5g073920 | yst subunit exo70 family protein    | AM+K_not_in_group |
| Medtr5g082940 | 34-type RING zinc finger protein    | AM+K_not_in_group |
| Medtr6g023370 | ie TIP49 TBP-interacting protein    | AM+K_not_in_group |
| Medtr7g116350 | class III chitinase                 | AM+K_not_in_group |
| Medtr8g027765 | alose-6-phosphate phosphatase       | AM+K_not_in_group |
| Medtr2g104940 | protein (MIP) family transporter    | AM+K_not_in_group |
| Medtr5g070090 | ucosyltransferase family protein    | AM+K_not_in_group |
| Medtr5g080770 | guanylyltransferase-like protein    | AM+K_not_in_group |
| Medtr8g019450 | ankyrin repeat plant-like protein   | AM+K_not_in_group |
| Medtr3g096140 | domain class transcription factor   | AM+K_not_in_group |
| Medtr1g021100 | 3-NBS-LRR class) family protein     | AM+K_not_in_group |
| Medtr2g035840 | heavy metal P-type ATPase           | AM+K_not_in_group |
| Medtr1g030650 | cpn60 chaperonin family protein     | AM+K_not_in_group |
| Medtr5g034820 | hreonine-tRNA ligase, putative      | AM+K_not_in_group |
| Medtr1g052110 | chaperone DnaJ domain protein       | AM+K_not_in_group |
| Medtr2g094430 | icopeptide (PPR) repeat protein     | AM+K_not_in_group |
| Medtr2g047845 | stein, putative (other strand read) | AM+K_not_in_group |
| Medtr3g109685 | ransmembrane protein, putative      | AM+K_not_in_group |
| Medtr3g106340 | hypothetical protein                | AM+K_not_in_group |
| Medtr1g054835 | zein-binding protein                | AM+K_not_in_group |
| Medtr1g081950 | VAMP-associated protein             | AM+K_not_in_group |
| Medtr7g063470 | 1 transcription factor-like protein | AM+K_not_in_group |
| Medtr5g066100 | haperone DnaJ-domain protein        | AM+K_not_in_group |
| Medtr2g073060 | hypothetical protein                | AM+K_not_in_group |
| Medtr3g009270 | ignalosome complex subunit 6a       | AM+K_not_in_group |
| Medtr8g027610 | tol 3-and 4-kinase family protein   | AM+K_not_in_group |
| Medtr7g109540 | rochrome C oxidase subunit 5C       | AM+K_not_in_group |
| Medtr3g014500 | ase resistance protein, putative    | AM+K_not_in_group |
| Medtr7g098040 | peptide transporter                 | AM+K_not_in_group |
| Medtr2g025170 | g protein 4 (RIN4) family protein   | AM+K_not_in_group |
| Medtr8g041650 | ysteine-rich receptor-like kinase   | AM+K_not_in_group |
| Medtr8g012795 | Defensin-like protein               | AM+K_not_in_group |
| Medtr1g073140 | cid dehalogenase-like hydrolase     | AM+K_not_in_group |
| Medtr1g012840 | ide/phox/Bem1p domain protein       | AM+K_not_in_group |
| Medtr4g093570 | ta-ureidopropionase-like protein    | AM+K_not_in_group |
| Medtr4g123850 | porter-like ABC domain protein      | AM+K_not_in_group |
| Medtr4g029020 | CBL-interacting kinase              | AM+K_not_in_group |
| Medtr1g033840 | 3PR containing plant-like protein   | AM+K_not_in_group |
| Medtr2g044660 | esterase/pectinesterase inhibitor   | AM+K_not_in_group |
| Medtr4g119830 | ein phosphatase 2C-like protein     | AM+K_not_in_group |
| Medtr7g016060 | ictase complex 1 MLRQ subunit       | AM+K_not_in_group |
| Medtr1g041810 | F-box protein                       | AM+K_not_in_group |
| Medtr7g109220 | nucleolar protein, putative         | AM+K_not_in_group |
| Medtr8g076940 | cytochrome P450 family protein      | AM+K_not_in_group |
| Medtr8g024590 | CBL-interacting kinase              | AM+K_not_in_group |
| Medtr2g010120 | module stress tolerance protein     | AM+K_not_in_group |
| Medtr2g011350 | s idant protein (other strand read) | AM+K_not_in_group |
| Medtr2g028470 | ismembrane MLO family protein       | AM+K_not_in_group |



## diffusion\_prioritization\_ALL

|                                                    |                   |
|----------------------------------------------------|-------------------|
| Medtr2g034350_s etical protein (other strand read) | AM+K_not_in_group |
| Medtr2g049340 uced plasma membrane protein         | AM+K_not_in_group |
| Medtr3g027150 rg (CaLB domain) family protein      | AM+K_not_in_group |
| Medtr3g090440 SnoaL-like domain protein            | AM+K_not_in_group |
| Medtr3g096930 aspartyl protease family protein     | AM+K_not_in_group |
| Medtr3g117720 ransmembrane protein, putative       | AM+K_not_in_group |
| Medtr5g034200_s lein, putative (other strand read) | AM+K_not_in_group |
| Medtr5g085810 ankyrin repeat protein               | AM+K_not_in_group |
| Medtr5g087470 20/alpha crystallin family protein   | AM+K_not_in_group |
| Medtr7g032660_s sion protein (other strand read)   | AM+K_not_in_group |
| Medtr7g086130 20/alpha crystallin family protein   | AM+K_not_in_group |
| Medtr7g089940 ransmembrane protein, putative       | AM+K_not_in_group |
| Medtr8g046245_s amily protein (other strand read)  | AM+K_not_in_group |
| Medtr8g066790 tetraspanin family protein           | AM+K_not_in_group |
| Medtr8g097020 ransmembrane protein, putative       | AM+K_not_in_group |
| Medtr1g100683 smatch repair MSH3-like protein      | AM+K_not_in_group |
| Medtr1g018620 lipase                               | AM+K_not_in_group |
| Medtr3g086580 alpha-galactosidase                  | AM+K_not_in_group |
| Medtr4g100510 :ity phosphatase domain protein      | AM+K_not_in_group |
| Medtr7g117620 ankyrin repeat protein               | AM+K_not_in_group |
| Medtr2g013450 PPR containing plant protein         | AM+K_not_in_group |
| Medtr3g086540 MAPK phosphatase                     | AM+K_not_in_group |
| Medtr7g076800 :ndent RNA helicase-like protein     | AM+K_not_in_group |
| Medtr5g057460 ne-Rich (NCR) secreted peptide       | AM+K_not_in_group |
| Medtr7g027050 late nodulin                         | AM+K_not_in_group |
| Medtr7g056500 LEED...PEED secreted peptide         | AM+K_not_in_group |
| Medtr8g031590                                      | AM+K_not_in_group |
| Medtr8g064070_s eted peptide (other strand read)   | AM+K_not_in_group |
| Medtr3g027610 :itiation factor 3 subunit, putative | AM+K_not_in_group |
| Medtr4g117050 ith YGL and LRDR motif protein       | AM+K_not_in_group |
| Medtr4g121860 :mall GTP-binding family protein     | AM+K_not_in_group |
| Medtr7g034395 rogenase family oxidoreductase       | AM+K_not_in_group |
| Medtr8g471140 hypothetical protein                 | AM+K_not_in_group |
| Medtr0512s0030 ne-Rich (NCR) secreted peptide      | AM+K_not_in_group |
| Medtr4g057160 ne-Rich (NCR) secreted peptide       | AM+K_not_in_group |
| Medtr5g066070 ProtKB/Swiss-Prot;Acc:P27992]        | AM+K_not_in_group |
| Medtr6g463320 ne-Rich (NCR) secreted peptide       | AM+K_not_in_group |
| Medtr7g066720 ne-Rich (NCR) secreted peptide       | AM+K_not_in_group |
| Medtr7g114890 hypothetical protein                 | AM+K_not_in_group |
| Medtr8g036850 ne-Rich (NCR) secreted peptide       | AM+K_not_in_group |
| Medtr1g089280 :onine kinase, plant-type protein    | AM+K_not_in_group |
| Medtr1g090810 leghemoglobin Lb120-1                | AM+K_not_in_group |
| Medtr2g015470 purine permease                      | AM+K_not_in_group |
| Medtr2g084725 ne-Rich (NCR) secreted peptide       | AM+K_not_in_group |
| Medtr3g055510 EF-hand pair protein                 | AM+K_not_in_group |
| Medtr4g019870 Ctr family copper transporter        | AM+K_not_in_group |
| Medtr4g118845 natin remodeling factor, putative    | AM+K_not_in_group |
| Medtr5g095590_s eted peptide (other strand read)   | AM+K_not_in_group |
| Medtr7g113080 RALF                                 | AM+K_not_in_group |
| Medtr4g058700 3HC4 type (RING finger) protein      | AM+K_not_in_group |
| Medtr4g113970 inc finger CCCH domain protein       | AM+K_not_in_group |

## diffusion\_prioritization\_ALL

|                |                                                      |                   |
|----------------|------------------------------------------------------|-------------------|
| Medtr1g027370  | receptor-like kinase                                 | AM+K_not_in_group |
| Medtr1g007640  | processing enzyme family protein                     | AM+K_not_in_group |
| Medtr3g069730  | G/FYVE/PHD zinc finger protein                       | AM+K_not_in_group |
| Medtr3g463900  | phosphatidyl-prolyl cis-trans isomerase              | AM+K_not_in_group |
| Medtr4g072410  | 60S ribosomal L35-like protein                       | AM+K_not_in_group |
| Medtr4g094750  | hypothetical protein                                 | AM+K_not_in_group |
| Medtr4g129150  | dimethylmethyltransferase, putative                  | AM+K_not_in_group |
| Medtr5g084930  | disulfide isomerase-like protein                     | AM+K_not_in_group |
| Medtr5g085580  | oxosyl hydrolase family 17 protein                   | AM+K_not_in_group |
| Medtr7g008030  | methyltransferase family protein                     | AM+K_not_in_group |
| Medtr7g013840  | zinc-activating binding-like protein                 | AM+K_not_in_group |
| Medtr7g110380  | phosphate transporter family protein                 | AM+K_not_in_group |
| Medtr7g110880  | hypothetical protein                                 | AM+K_not_in_group |
| Medtr8g012970  | cytochrome P450 family 88 protein                    | AM+K_not_in_group |
| Medtr8g023500  | K <sup>+</sup> -H <sup>+</sup> exchange-like protein | AM+K_not_in_group |
| Medtr8g040740  | 40S ribosomal protein S19-1                          | AM+K_not_in_group |
| Medtr8g070115  | seductase family oxidoreductase                      | AM+K_not_in_group |
| Medtr8g099150  | 50S ribosomal L30-like protein                       | AM+K_not_in_group |
| Medtr1g030480  | chlorophyllide A oxygenase                           | AM+K_not_in_group |
| Medtr1g069325  | pfkB family carbohydrate kinase                      | AM+K_not_in_group |
| Medtr3g100620  | general regulatory factor 2                          | AM+K_not_in_group |
| Medtr4g120420  | hypothetical protein                                 | AM+K_not_in_group |
| Medtr8g090025  | acid dehalogenase-like hydrolase                     | AM+K_not_in_group |
| Medtr1g081790  | protein kinase kinase-like protein                   | AM+K_not_in_group |
| Medtr1g022190  | acetate dehydrogenase family protein                 | AM+K_not_in_group |
| Medtr1g078490  | (NBS-LRR class) family protein                       | AM+K_not_in_group |
| Medtr3g081580  | zinc/iron transport family protein                   | AM+K_not_in_group |
| Medtr4g079580  | TCP family transcription factor                      | AM+K_not_in_group |
| Medtr2g083520  | (TIR-NBS-LRR class), putative                        | AM+K_not_in_group |
| Medtr1g040020  | 50S ribosomal protein L22                            | AM+K_not_in_group |
| Medtr3g021440  | caffeic acid O-methyltransferase                     | AM+K_not_in_group |
| Medtr0045s0070 | cytochrome P450 family 90 protein                    | AM+K_not_in_group |
| Medtr5g075400  | hypothetical protein (other strand read)             | AM+K_not_in_group |
| Medtr1g011800  | plant/F18G18-200 protein                             | AM+K_not_in_group |
| Medtr3g117760  | pollen Ole e I family allergen                       | AM+K_not_in_group |
| Medtr8g027100  | hypothetical protein (other strand read)             | AM+K_not_in_group |
| Medtr3g111900  | yl-CoA synthetase family protein                     | AM+K_not_in_group |
| Medtr8g012945  | oxidoreductase 10.5 kDa subunit                      | AM+K_not_in_group |
| Medtr3g111360  | hypothetical protein                                 | AM+K_not_in_group |
| Medtr4g071230  | xylulose kinase-like protein                         | AM+K_not_in_group |
| Medtr4g101740  | translation elongation factor EF protein             | AM+K_not_in_group |
| Medtr3g053910  | zinc DNA-binding protein, putative                   | AM+K_not_in_group |
| Medtr3g075230  | acid dehalogenase-like hydrolase                     | AM+K_not_in_group |
| Medtr1g113830  | serine-threonine kinase ATR-like protein             | AM+K_not_in_group |
| Medtr0003s0180 | serine-Rich (NCR) secreted peptide                   | AM+K_not_in_group |
| Medtr0054s0190 | serine-Rich (NCR) secreted peptide                   | AM+K_not_in_group |
| Medtr5g081590  | lysine-specific Glycine Rich Peptide                 | AM+K_not_in_group |
| Medtr7g051320  | serine-Rich (NCR) secreted peptide                   | AM+K_not_in_group |
| Medtr7g115300  | receptor-like kinase family protein                  | AM+K_not_in_group |
| Medtr0009s0390 | heat shock protein 81-2                              | AM+K_not_in_group |
| Medtr1g041745  | starch developmental protein DAG                     | AM+K_not_in_group |

## diffusion\_prioritization\_ALL

|                |                                   |                   |
|----------------|-----------------------------------|-------------------|
| Medtr2g006210  | lopmental protein DAG, putative   | AM+K_not_in_group |
| Medtr3g075500  | 31 kDa ribonucleoprotein          | AM+K_not_in_group |
| Medtr8g468600  | ckle (CCHC-type) family protein   | AM+K_not_in_group |
| Medtr2g039290  | Serine/Threonine-kinase ALE2      | AM+K_not_in_group |
| Medtr5g010090  | glycerate mutase family protein   | AM+K_not_in_group |
| Medtr3g435580  | DUF3223 family protein            | AM+K_not_in_group |
| Medtr5g033090  | 60S ribosomal protein L27a-3      | AM+K_not_in_group |
| Medtr6g013030  | cyclin-dependent kinase           | AM+K_not_in_group |
| Medtr3g094710  | ceptor-like kinase family protein | AM+K_not_in_group |
| Medtr5g022000  | ption domain associated protein   | AM+K_not_in_group |
| Medtr0032s0170 | ne-Rich (NCR) secreted peptide    | AM+K_not_in_group |
| Medtr0048s0180 | late nodulin                      | AM+K_not_in_group |
| Medtr0115s0030 | ne-Rich (NCR) secreted peptide    | AM+K_not_in_group |
| Medtr0672s0010 | ne-Rich (NCR) secreted peptide    | AM+K_not_in_group |
| Medtr1g041915  | ne-Rich (NCR) secreted peptide    | AM+K_not_in_group |
| Medtr1g049330  | leghemoglobin Lb120-1             | AM+K_not_in_group |
| Medtr1g052005  | ne-Rich (NCR) secreted peptide    | AM+K_not_in_group |
| Medtr1g053265  | hypothetical protein              | AM+K_not_in_group |
| Medtr1g061100  | ne-Rich (NCR) secreted peptide    | AM+K_not_in_group |
| Medtr1g061110  | ne-Rich (NCR) secreted peptide    | AM+K_not_in_group |
| Medtr1g075500  | ne-Rich (NCR) secreted peptide    | AM+K_not_in_group |
| Medtr1g093850  | CHUP1-like protein                | AM+K_not_in_group |
| Medtr2125s0010 | ne-Rich (NCR) secreted peptide    | AM+K_not_in_group |
| Medtr2g047080  | ne-Rich (NCR) secreted peptide    | AM+K_not_in_group |
| Medtr2g060960  | ne-Rich (NCR) secreted peptide    | AM+K_not_in_group |
| Medtr2g062900  | ne-Rich (NCR) secreted peptide    | AM+K_not_in_group |
| Medtr2g063130  | ne-Rich (NCR) secreted peptide    | AM+K_not_in_group |
| Medtr2g072670  | hypothetical protein              | AM+K_not_in_group |
| Medtr2g073170  | ne-Rich (NCR) secreted peptide    | AM+K_not_in_group |
| Medtr2g079470  | late nodulin                      | AM+K_not_in_group |
| Medtr2g083280  | ne-Rich (NCR) secreted peptide    | AM+K_not_in_group |
| Medtr2g087285  | nalate transporter family protein | AM+K_not_in_group |
| Medtr2g087830  | hypothetical protein              | AM+K_not_in_group |
| Medtr2g104570  | ne-Rich (NCR) secreted peptide    | AM+K_not_in_group |
| Medtr3g006650  | ne-Rich (NCR) secreted peptide    | AM+K_not_in_group |
| Medtr3g010490  | ne-Rich (NCR) secreted peptide    | AM+K_not_in_group |
| Medtr3g011830  | ne-Rich (NCR) secreted peptide    | AM+K_not_in_group |
| Medtr3g015665  | ne-Rich (NCR) secreted peptide    | AM+K_not_in_group |
| Medtr3g015870  | ne-Rich (NCR) secreted peptide    | AM+K_not_in_group |
| Medtr3g016090  | ne-Rich (NCR) secreted peptide    | AM+K_not_in_group |
| Medtr3g020340  | Defensin-like protein             | AM+K_not_in_group |
| Medtr3g030420  | late nodulin                      | AM+K_not_in_group |
| Medtr3g031320  | ne-Rich (NCR) secreted peptide    | AM+K_not_in_group |
| Medtr3g053600  | ne-Rich (NCR) secreted peptide    | AM+K_not_in_group |
| Medtr3g055480  | EF-hand pair protein              | AM+K_not_in_group |
| Medtr3g055490  | EF-hand pair protein              | AM+K_not_in_group |
| Medtr3g055570  | id calcium-binding family protein | AM+K_not_in_group |
| Medtr3g055585  | EF-hand pair protein              | AM+K_not_in_group |
| Medtr3g062820  | ne-Rich (NCR) secreted peptide    | AM+K_not_in_group |
| Medtr3g062880  | ne-Rich (NCR) secreted peptide    | AM+K_not_in_group |
| Medtr3g065750  | ne-Rich (NCR) secreted peptide    | AM+K_not_in_group |

diffusion\_prioritization\_ALL

|                                                   |                   |
|---------------------------------------------------|-------------------|
| Medtr3g069830 ne-Rich (NCR) secreted peptide      | AM+K_not_in_group |
| Medtr3g084820 ne-Rich (NCR) secreted peptide      | AM+K_not_in_group |
| Medtr3g084910 ne-Rich (NCR) secreted peptide      | AM+K_not_in_group |
| Medtr3g089005 basic blue-like protein             | AM+K_not_in_group |
| Medtr3g436990 ne-Rich (NCR) secreted peptide      | AM+K_not_in_group |
| Medtr3g467600 peroxidase family protein           | AM+K_not_in_group |
| Medtr4g011680 LEED...PEED secreted peptide        | AM+K_not_in_group |
| Medtr4g023900 ne-Rich (NCR) secreted peptide      | AM+K_not_in_group |
| Medtr4g033290 ne-Rich (NCR) secreted peptide      | AM+K_not_in_group |
| Medtr4g033830 ne-Rich (NCR) secreted peptide      | AM+K_not_in_group |
| Medtr4g049640 ite transporter/malic acid protein  | AM+K_not_in_group |
| Medtr4g052380 ile hydratase NIT4A-like protein    | AM+K_not_in_group |
| Medtr4g053180 ne-Rich (NCR) secreted peptide      | AM+K_not_in_group |
| Medtr4g053580 ne-Rich (NCR) secreted peptide      | AM+K_not_in_group |
| Medtr4g055680 late nodulin                        | AM+K_not_in_group |
| Medtr4g056320 gume lectin beta domain protein     | AM+K_not_in_group |
| Medtr4g056380 gume lectin beta domain protein     | AM+K_not_in_group |
| Medtr4g059890 hypothetical protein                | AM+K_not_in_group |
| Medtr4g059900 ne-Rich (NCR) secreted peptide      | AM+K_not_in_group |
| Medtr4g060605 ne-Rich (NCR) secreted peptide      | AM+K_not_in_group |
| Medtr4g060610 ne-Rich (NCR) secreted peptide      | AM+K_not_in_group |
| Medtr4g060650 ne-Rich (NCR) secreted peptide      | AM+K_not_in_group |
| Medtr4g060730 ne-Rich (NCR) secreted peptide      | AM+K_not_in_group |
| Medtr4g063740 ne-Rich (NCR) secreted peptide      | AM+K_not_in_group |
| Medtr4g066160 hypothetical protein                | AM+K_not_in_group |
| Medtr4g094360 rA-like transporter family protein  | AM+K_not_in_group |
| Medtr4g435298 ne-Rich (NCR) secreted peptide      | AM+K_not_in_group |
| Medtr5g019870 l/monosaccharide transporter 1      | AM+K_not_in_group |
| Medtr5g021050 dylinositol transfer family protein | AM+K_not_in_group |
| Medtr5g026080 ne-Rich (NCR) secreted peptide      | AM+K_not_in_group |
| Medtr5g041610 leghemoglobin Lb120-1               | AM+K_not_in_group |
| Medtr5g056185 late nodulin                        | AM+K_not_in_group |
| Medtr5g056360 ne-Rich (NCR) secreted peptide      | AM+K_not_in_group |
| Medtr5g059445 ne-Rich (NCR) secreted peptide      | AM+K_not_in_group |
| Medtr5g061800 ne-Rich (NCR) secreted peptide      | AM+K_not_in_group |
| Medtr5g062510 ne-Rich (NCR) secreted peptide      | AM+K_not_in_group |
| Medtr5g063460 ne-Rich (NCR) secreted peptide      | AM+K_not_in_group |
| Medtr5g063580 ne-Rich (NCR) secreted peptide      | AM+K_not_in_group |
| Medtr5g063600 ne-Rich (NCR) secreted peptide      | AM+K_not_in_group |
| Medtr5g064870 slein, putative (other strand read) | AM+K_not_in_group |
| Medtr5g068810 ne-Rich (NCR) secreted peptide      | AM+K_not_in_group |
| Medtr5g069545 ne-Rich (NCR) secreted peptide      | AM+K_not_in_group |
| Medtr5g072450 ne-Rich (NCR) secreted peptide      | AM+K_not_in_group |
| Medtr5g076255 ne-Rich (NCR) secreted peptide      | AM+K_not_in_group |
| Medtr5g081000 leghemoglobin Lb120-1               | AM+K_not_in_group |
| Medtr5g083255 ne-Rich (NCR) secreted peptide      | AM+K_not_in_group |
| Medtr5g095595 ne-Rich (NCR) secreted peptide      | AM+K_not_in_group |
| Medtr6g006245 ne-Rich (NCR) secreted peptide      | AM+K_not_in_group |
| Medtr6g006500 ne-Rich (NCR) secreted peptide      | AM+K_not_in_group |
| Medtr6g025330 late nodulin                        | AM+K_not_in_group |
| Medtr6g038290 ne-Rich (NCR) secreted peptide      | AM+K_not_in_group |

## diffusion\_prioritization\_ALL

|                                                   |                   |
|---------------------------------------------------|-------------------|
| Medtr6g043380 ne-Rich (NCR) secreted peptide      | AM+K_not_in_group |
| Medtr6g055160 ne-Rich (NCR) secreted peptide      | AM+K_not_in_group |
| Medtr6g086170 exchanger and transporter sat-1     | AM+K_not_in_group |
| Medtr6g090485 ne-Rich (NCR) secreted peptide      | AM+K_not_in_group |
| Medtr6g091600 pollen Ole e I family allergen      | AM+K_not_in_group |
| Medtr6g445080 ne-Rich (NCR) secreted peptide      | AM+K_not_in_group |
| Medtr6g452900 ne-Rich (NCR) secreted peptide      | AM+K_not_in_group |
| Medtr6g453200 ne-Rich (NCR) secreted peptide      | AM+K_not_in_group |
| Medtr6g461980 ne-Rich (NCR) secreted peptide      | AM+K_not_in_group |
| Medtr6g462060 ne-Rich (NCR) secreted peptide      | AM+K_not_in_group |
| Medtr6g463200 ne-Rich (NCR) secreted peptide      | AM+K_not_in_group |
| Medtr6g464360 ne-Rich (NCR) secreted peptide      | AM+K_not_in_group |
| Medtr6g464870 ne-Rich (NCR) secreted peptide      | AM+K_not_in_group |
| Medtr6g466410 ne-Rich (NCR) secreted peptide      | AM+K_not_in_group |
| Medtr7g008100 ne-Rich (NCR) secreted peptide      | AM+K_not_in_group |
| Medtr7g008940 ne-Rich (NCR) secreted peptide      | AM+K_not_in_group |
| Medtr7g009040 ne-Rich (NCR) secreted peptide      | AM+K_not_in_group |
| Medtr7g016440 ne-Rich (NCR) secreted peptide      | AM+K_not_in_group |
| Medtr7g027180 ne-Rich (NCR) secreted peptide      | AM+K_not_in_group |
| Medtr7g028800 ne-Rich (NCR) secreted peptide      | AM+K_not_in_group |
| Medtr7g029760 ne-Rich (NCR) secreted peptide      | AM+K_not_in_group |
| Medtr7g032920 late nodulin                        | AM+K_not_in_group |
| Medtr7g045520 ne-Rich (NCR) secreted peptide      | AM+K_not_in_group |
| Medtr7g056030 ne-Rich (NCR) secreted peptide      | AM+K_not_in_group |
| Medtr7g056700 ne-Rich (NCR) secreted peptide      | AM+K_not_in_group |
| Medtr7g063400 ne-Rich (NCR) secreted peptide      | AM+K_not_in_group |
| Medtr7g064020 ne-Rich (NCR) secreted peptide      | AM+K_not_in_group |
| Medtr7g064965 hypothetical protein                | AM+K_not_in_group |
| Medtr7g065015 ne-Rich (NCR) secreted peptide      | AM+K_not_in_group |
| Medtr7g065025 ne-Rich (NCR) secreted peptide      | AM+K_not_in_group |
| Medtr7g070645 ne-Rich (NCR) secreted peptide      | AM+K_not_in_group |
| Medtr7g071220 ne-Rich (NCR) secreted peptide      | AM+K_not_in_group |
| Medtr7g071720 ne-Rich (NCR) secreted peptide      | AM+K_not_in_group |
| Medtr7g078060 yltransferase WSD1-like protein     | AM+K_not_in_group |
| Medtr7g095860 ne-Rich (NCR) secreted peptide      | AM+K_not_in_group |
| Medtr7g098180 peptide transporter                 | AM+K_not_in_group |
| Medtr7g446010 LCR                                 | AM+K_not_in_group |
| Medtr8g006775 auxin efflux carrier family protein | AM+K_not_in_group |
| Medtr8g038715 ne-Rich (NCR) secreted peptide      | AM+K_not_in_group |
| Medtr8g079680 ribosomal protein L25, putative     | AM+K_not_in_group |
| Medtr3g083630 squalene/phytoene synthase          | AM+K_not_in_group |
| Medtr3g047890 receptor-like kinase plant          | AM+K_not_in_group |
| Medtr1g012620 myosin heavy chain-like protein     | AM+K_not_in_group |
| Medtr7g099710 nic acid resistance family protein  | AM+K_not_in_group |
| Medtr1g087760 tarate transaminase-like protein    | AM+K_not_in_group |
| Medtr2g062700 dent methyltransferase, putative    | AM+K_not_in_group |
| Medtr3g092710 ranscriptionally active 15 protein  | AM+K_not_in_group |
| Medtr3g095070 TPR superfamily protein             | AM+K_not_in_group |
| Medtr4g019910 SnoaL-like domain protein           | AM+K_not_in_group |
| Medtr4g088615 ribosomal protein S5                | AM+K_not_in_group |
| Medtr4g105500 defective 2759 protein, putative    | AM+K_not_in_group |

diffusion\_prioritization\_ALL

|                |                                      |                   |
|----------------|--------------------------------------|-------------------|
| Medtr5g038520  | in translocation complex protein     | AM+K_not_in_group |
| Medtr7g100328  | TPR superfamily protein              | AM+K_not_in_group |
| Medtr3g086070  | isease resistance protein RGA4       | AM+K_not_in_group |
| Medtr4g060660  | ne-Rich (NCR) secreted peptide       | AM+K_not_in_group |
| Medtr7g033910  | nucleoporin-like protein             | AM+K_not_in_group |
| Medtr3g030400  | hypothetical protein                 | AM+K_not_in_group |
| Medtr7g088880  | lakoid luminal 29.8 kDa protein      | AM+K_not_in_group |
| Medtr5g095620  | ne-Rich (NCR) secreted peptide       | AM+K_not_in_group |
| Medtr1g052730  | exostosin family protein             | AM+K_not_in_group |
| Medtr4g485520  | dillo/beta-catenin repeat protein    | AM+K_not_in_group |
| Medtr5g087550  | enzyme A reductase-like protein      | AM+K_not_in_group |
| Medtr7g109390  | furanosidase/beta-D-xylosidase       | AM+K_not_in_group |
| Medtr7g023290  | lakoid luminal 25.6 kDa protein      | AM+K_not_in_group |
| Medtr0126s0080 | BZIP family transcription factor     | AM+K_not_in_group |
| Medtr1g083690  | tic/protein phosphatase type 2C      | AM+K_not_in_group |
| Medtr4g083540  | ie-binding protein) family protein   | AM+K_not_in_group |
| Medtr4g108760  | transcription factor-like protein    | AM+K_not_in_group |
| Medtr4g134760  | ly-sosomal glucosylceramidase        | AM+K_not_in_group |
| Medtr8g094800  | dehydrase and lipid transporter      | AM+K_not_in_group |
| Medtr4g019790  | , amino-terminal domain protein      | AM+K_not_in_group |
| Medtr4g018680  | ne-Rich (NCR) secreted peptide       | AM+K_not_in_group |
| Medtr4g088255  | late nodulin                         | AM+K_not_in_group |
| Medtr6g060370  | ne-Rich (NCR) secreted peptide       | AM+K_not_in_group |
| Medtr6g084730  | ne-Rich (NCR) secreted peptide       | AM+K_not_in_group |
| Medtr7g090950  | aryotic-type carbonic anhydrase      | AM+K_not_in_group |
| Medtr8g076190  | microtubule motor family protein     | AM+K_not_in_group |
| Medtr1g047130  | 50S ribosomal L24-like protein       | AM+K_not_in_group |
| Medtr1g072370  | small nuclear ribonucleoprotein      | AM+K_not_in_group |
| Medtr1g075720  | 60S ribosomal L14-like protein       | AM+K_not_in_group |
| Medtr1g088450  | ribosomal L22e family protein        | AM+K_not_in_group |
| Medtr1g088550  | lex 1 protein, LYR family protein    | AM+K_not_in_group |
| Medtr1g100960  | 60S ribosomal protein L36            | AM+K_not_in_group |
| Medtr2g012450  | 60S ribosomal protein L26-1          | AM+K_not_in_group |
| Medtr2g014030  | 40S ribosomal protein S6-2           | AM+K_not_in_group |
| Medtr2g069490  | RNA recognition motif                | AM+K_not_in_group |
| Medtr2g096340  | 60S ribosomal protein L23a-2         | AM+K_not_in_group |
| Medtr3g080670  | r membrane translocase protein       | AM+K_not_in_group |
| Medtr3g084040  | l/RBD/RNP motif) family protein      | AM+K_not_in_group |
| Medtr3g085490  | 60S ribosomal protein L17A           | AM+K_not_in_group |
| Medtr3g095810  | 40S ribosomal SA-like protein        | AM+K_not_in_group |
| Medtr3g098820  | r membrane translocase protein       | AM+K_not_in_group |
| Medtr3g106310  | 60S ribosomal protein L39-3          | AM+K_not_in_group |
| Medtr4g070600  | ribosomal protein S25                | AM+K_not_in_group |
| Medtr4g094315  | ase/nucleic acid-binding protein     | AM+K_not_in_group |
| Medtr4g096790  | ribosomal protein S11                | AM+K_not_in_group |
| Medtr4g102390  | Hsc70-interacting protein            | AM+K_not_in_group |
| Medtr5g018940  | 40S ribosomal S4-like protein        | AM+K_not_in_group |
| Medtr6g003970  | elongation factor Ts protein         | AM+K_not_in_group |
| Medtr7g010150  | 60S ribosomal L34-like protein       | AM+K_not_in_group |
| Medtr7g013730  | l/RBD/RNP motif) family protein      | AM+K_not_in_group |
| Medtr7g021870  | tic translation initiation factor 3h | AM+K_not_in_group |

diffusion\_prioritization\_ALL

|                                                             |                   |
|-------------------------------------------------------------|-------------------|
| Medtr7g052690 methyltransferase domain protein              | AM+K_not_in_group |
| Medtr7g053160 40S ribosomal protein S6-2                    | AM+K_not_in_group |
| Medtr7g063520 glycoprotein family protein                   | AM+K_not_in_group |
| Medtr7g076940 60S ribosomal L8-like protein                 | AM+K_not_in_group |
| Medtr7g086470 ribosomal protein L25, putative               | AM+K_not_in_group |
| Medtr7g101760 translin-like protein                         | AM+K_not_in_group |
| Medtr7g118060 60S acidic ribosomal protein                  | AM+K_not_in_group |
| Medtr8g017420 ribosomal protein L34                         | AM+K_not_in_group |
| Medtr8g027190 (RBD/RNP motif) family protein                | AM+K_not_in_group |
| Medtr8g069460 60S ribosomal protein L27a-3                  | AM+K_not_in_group |
| Medtr8g076830 40S ribosomal protein S11-1                   | AM+K_not_in_group |
| Medtr8g080460 60S ribosomal protein L17A                    | AM+K_not_in_group |
| Medtr8g089655 ribosomal-like protein, putative              | AM+K_not_in_group |
| Medtr8g106010 motor subunit TOM40-like protein              | AM+K_not_in_group |
| Medtr1g013050 aspartate aminotransferase                    | AM+K_not_in_group |
| Medtr1g103050 3HC4 type (RING finger) protein               | AM+K_not_in_group |
| Medtr1g106735 DUF566 family protein                         | AM+K_not_in_group |
| Medtr2g009770 zein-binding protein                          | AM+K_not_in_group |
| Medtr3g070330 zinc-binding protein, putative                | AM+K_not_in_group |
| Medtr4g119770 substrate carrier family protein              | AM+K_not_in_group |
| Medtr5g014370 hypothetical protein                          | AM+K_in_group     |
| Medtr2g013900 tyrosine kinase family protein                | AM+K_not_in_group |
| Medtr8g068540 receptor-like kinase family protein           | AM+K_not_in_group |
| Medtr7g083900 helix loop helix protein BHLH23               | AM+K_not_in_group |
| Medtr1g083600 TPR repeat protein                            | AM+K_not_in_group |
| Medtr3g098480 motor of succinate dehydrogenase              | AM+K_not_in_group |
| Medtr1g492640 oxo acid transporter family protein           | AM+K_not_in_group |
| Medtr8g107430 transmembrane protein, putative               | AM+K_not_in_group |
| Medtr4g111975 transcription factor family protein           | AM+K_in_group     |
| Medtr1g006600 exostosin family protein                      | AM+K_not_in_group |
| Medtr5g014240 family pent-kaurenoic acid oxidase            | AM+K_not_in_group |
| Medtr8g078250 transmembrane family protein                  | AM+K_not_in_group |
| Medtr1g029440 transmembrane protein, putative               | AM+K_not_in_group |
| Medtr1g073130 processing peptidase-like protein             | AM+K_not_in_group |
| Medtr5g095770 TIC protein 20-V, putative                    | AM+K_not_in_group |
| Medtr4g098870 casein kinase II regulator-APRR2-like protein | AM+K_not_in_group |
| Medtr1g029690 alpha hydrolase-like domain kinase            | AM+K_not_in_group |
| Medtr3g107920 protein L4, bacterial/organelle protein       | AM+K_not_in_group |
| Medtr7g089480 protein domain kinase CDPK protein            | AM+K_not_in_group |
| Medtr1g044125 hypothetical protein                          | AM+K_not_in_group |
| Medtr1g050545 alpha carboxypeptidase-like protein           | AM+K_not_in_group |
| Medtr5g014040 casein kinase II regulator-APRR2-like protein | AM+K_not_in_group |
| Medtr7g086660 ENT domain protein                            | AM+K_not_in_group |
| Medtr8g027605 defective 1703 protein, putative              | AM+K_not_in_group |
| Medtr8g030680 alpha peptide peptidase-like protein          | AM+K_not_in_group |
| Medtr3g109390 kinase AFC1                                   | AM+K_not_in_group |
| Medtr3g111980 alpha-glucosidase-like protein Bet protein    | AM+K_not_in_group |
| Medtr5g078030 response/antifungal domain protein            | AM+K_not_in_group |
| Medtr8g067490 (RING finger) family protein, putative        | AM+K_not_in_group |
| Medtr7g061830 (RING finger)-related protein 4C              | AM+K_not_in_group |
| Medtr3g013460 (G07020) TAIR;Acc:AT5G07020]                  | AM+K_not_in_group |

## diffusion\_prioritization\_ALL

|                                                  |                   |
|--------------------------------------------------|-------------------|
| Medtr5g014260 /cine cleavage system H protein    | AM+K_not_in_group |
| Medtr3g079860 ribonuclease III domain protein    | AM+K_not_in_group |
| Medtr1g042280 casein kinase I-like protein       | AM+K_not_in_group |
| Medtr5g097010 Jeryltransferase family protein    | AM+K_not_in_group |
| Medtr5g098530 ransmembrane protein, putative     | AM+K_not_in_group |
| Medtr0019s0070 calmodulin-binding protein        | AM+K_not_in_group |
| Medtr1g007740 transducin/WD40 repeat protein     | AM+K_not_in_group |
| Medtr2g026130 /beta-catenin-like repeat protein  | AM+K_not_in_group |
| Medtr3g085570 kelch repeat F-box protein         | AM+K_not_in_group |
| Medtr4g091290 port inhibitor response 1 protein  | AM+K_not_in_group |
| Medtr5g011070 ll knotted-like homeobox protein   | AM+K_not_in_group |
| Medtr6g007110 kinesin light chain                | AM+K_not_in_group |
| Medtr8g056100 tty acid/sphingolipid desaturase   | AM+K_not_in_group |
| Medtr8g064560 acturonase non-catalytic protein   | AM+K_not_in_group |
| Medtr1g029150 stearyl-acyl-carrier desaturase    | AM+K_not_in_group |
| Medtr2g042970 DUF581 family protein              | AM+K_not_in_group |
| Medtr5g013770 ethphon-induced protein            | AM+K_not_in_group |
| Medtr1g063960 resistance protein KR1, putative   | AM+K_not_in_group |
| Medtr2g086590 DUF3049 family protein             | AM+K_not_in_group |
| Medtr7g084300 stilbene synthase family protein   | AM+K_not_in_group |
| Medtr1g107285 -glucosyltransferase-like protein  | AM+K_not_in_group |
| Medtr3g437110 ndodeoxyribonuclease, putative     | AM+K_not_in_group |
| Medtr4g092830 -like acyl-esterase family protein | AM+K_not_in_group |
| Medtr1g114000 :rase II transcription subunit 36a | AM+K_not_in_group |
| Medtr5g010025 40S ribosomal S10-like protein     | AM+K_not_in_group |
| Medtr3g067645 F-box/LRR protein                  | AM+K_not_in_group |
| Medtr1g009960 core-2/l-branching enzyme          | AM+K_not_in_group |
| Medtr1g010030 t RNA helicase DHX16, putative     | AM+K_not_in_group |
| Medtr2g103360 embryo-specific protein            | AM+K_not_in_group |
| Medtr4g007090 ospholipid N-methyltransferase     | AM+K_not_in_group |
| Medtr4g130780 early nodulin-like protein         | AM+K_not_in_group |
| Medtr3g074730 RNA recognition domain protein     | AM+K_not_in_group |
| Medtr1g087030 calvin cycle protein CP12-1        | AM+K_not_in_group |
| Medtr3g061630 chaperonin-like RbcX protein       | AM+K_not_in_group |
| Medtr4g072040 y)-binding rossmann-fold protein   | AM+K_not_in_group |
| Medtr4g127690 ransmembrane protein, putative     | AM+K_not_in_group |
| Medtr8g075960 ransmembrane protein, putative     | AM+K_not_in_group |
| Medtr8g461030 thionine sulfoxide reductase B 2   | AM+K_not_in_group |
| Medtr2g103303 embryo-specific protein            | AM+K_not_in_group |
| Medtr0151s0030 nonophosphatase family protein    | AM+K_not_in_group |
| Medtr1g075320 yl-L-amino acid amidohydrolase     | AM+K_not_in_group |
| Medtr1g100070 beta-carotene hydroxylase          | AM+K_not_in_group |
| Medtr1g107525 renine formamidase-like protein    | AM+K_not_in_group |
| Medtr2g067640 DUF946 family protein              | AM+K_not_in_group |
| Medtr2g096920 outer envelope pore protein        | AM+K_not_in_group |
| Medtr2g103300 aspartate racemase                 | AM+K_not_in_group |
| Medtr3g005720 , amino-terminal domain protein    | AM+K_not_in_group |
| Medtr3g005970 l dehydrogenase domain protein     | AM+K_not_in_group |
| Medtr3g027870 ltransferase SpoU family protein   | AM+K_not_in_group |
| Medtr3g040090 ;C-type transport system protein   | AM+K_not_in_group |
| Medtr3g064140 ;transferase superfamily protein   | AM+K_not_in_group |



## diffusion\_prioritization\_ALL

|                |                                      |                   |
|----------------|--------------------------------------|-------------------|
| Medtr3g095490  | osphate synthase small subunit       | AM+K_not_in_group |
| Medtr4g057685  | oylglutathione lyase-like protein    | AM+K_not_in_group |
| Medtr4g060900  | alpha/beta fold hydrolase            | AM+K_not_in_group |
| Medtr4g084130  | cpn60 chaperonin family protein      | AM+K_not_in_group |
| Medtr4g084190  | ne carboxy-term-binding protein      | AM+K_not_in_group |
| Medtr4g092800  | thionine sulfoxide reductase B 2     | AM+K_not_in_group |
| Medtr4g100760  | tol 2-dehydrogenase-like protein     | AM+K_not_in_group |
| Medtr4g115730  | rase/dehydratase family protein      | AM+K_not_in_group |
| Medtr4g126050  | alacyclovir hydrolase, putative      | AM+K_not_in_group |
| Medtr4g127370  | alpha-L-fucosidase                   | AM+K_not_in_group |
| Medtr4g133945  | lix hydrolase superfamily protein    | AM+K_not_in_group |
| Medtr4g134950  | outer envelope pore protein          | AM+K_not_in_group |
| Medtr5g033700  | biosynthesis methyltransferase       | AM+K_not_in_group |
| Medtr7g079520  | κ4 family monothiol glutaredoxin     | AM+K_not_in_group |
| Medtr7g082980  | Clp protease proteolytic protein     | AM+K_not_in_group |
| Medtr7g103020  | triosephosphate isomerase            | AM+K_not_in_group |
| Medtr7g108580  | ic C-1-tetrahydrofolate synthase     | AM+K_not_in_group |
| Medtr7g109970  | nitrogen regulatory protein P-II     | AM+K_not_in_group |
| Medtr7g112720  | N-acetyltransferase-like protein     | AM+K_not_in_group |
| Medtr8g028040  | serine acetyltransferase             | AM+K_not_in_group |
| Medtr6g066100  | ransmembrane protein, putative       | AM+K_not_in_group |
| Medtr2g017520  | ynthesis protein PDX1, putative      | AM+K_not_in_group |
| Medtr0144s0010 | NBS-LRR resistance protein           | AM+K_not_in_group |
| Medtr1g113900  | rotein interaction domain protein    | AM+K_not_in_group |
| Medtr2g029820  | peroxidase family protein            | AM+K_not_in_group |
| Medtr3g055960  | rg (CaLB domain) family protein      | AM+K_not_in_group |
| Medtr3g100300  | ransmembrane protein, putative       | AM+K_not_in_group |
| Medtr3g111095  | s etical protein (other strand read) | AM+K_not_in_group |
| Medtr4g035850  | uridylate kinase-like protein        | AM+K_not_in_group |
| Medtr4g043720  | hypothetical protein                 | AM+K_not_in_group |
| Medtr4g063310  | ransmembrane protein, putative       | AM+K_not_in_group |
| Medtr4g115160  | nucleosome assembly protein          | AM+K_not_in_group |
| Medtr5g015750  | hypothetical protein                 | AM+K_not_in_group |
| Medtr5g072140  | main disease resistance protein      | AM+K_not_in_group |
| Medtr6g038820  | LRR receptor-like kinase             | AM+K_not_in_group |
| Medtr8g052030  | 40S ribosomal S4-like protein        | AM+K_not_in_group |
| Medtr7g091380  | ABC transporter family protein       | AM+K_not_in_group |
| Medtr4g059000  | icular fusion MON1-like protein      | AM+K_not_in_group |
| Medtr1g069465  | II reaction center Psb28 protein     | AM+K_not_in_group |
| Medtr8g103870  | catabolite repressor-like protein    | AM+K_not_in_group |
| Medtr1g089900  | E3 ubiquitin ligase-like protein     | AM+K_not_in_group |
| Medtr3g087920  | zinc finger protein                  | AM+K_not_in_group |
| Medtr4g120990  | DUF789 family protein                | AM+K_not_in_group |
| Medtr5g016680  | RNA recognition motif                | AM+K_not_in_group |
| Medtr5g032370  | chaperone DnaJ-domain protein        | AM+K_not_in_group |
| Medtr7g087450  | erase II-binding domain protein      | AM+K_not_in_group |
| Medtr5g033210  | F-box plant-like protein             | AM+K_not_in_group |
| Medtr8g096860  | hypothetical protein                 | AM+K_not_in_group |
| Medtr5g092010  | snRNP Sm family protein              | AM+K_not_in_group |
| Medtr3g099120  | non-specific phospholipase C4        | AM+K_not_in_group |
| Medtr1g053160  | ependent thioredoxin reductase       | AM+K_not_in_group |

## diffusion\_prioritization\_ALL

|                 |                                            |                   |
|-----------------|--------------------------------------------|-------------------|
| Medtr2g042720   | chlorophyll A/B-binding protein            | AM+K_not_in_group |
| Medtr4g007080   | ident cyclic electron flow protein         | AM+K_not_in_group |
| Medtr5g064610   | thylakoid lumenal 29 kDa protein           | AM+K_not_in_group |
| Medtr8g096080   | glycosyl group transferase                 | AM+K_not_in_group |
| Medtr3g464380   | NAD(P)H dehydrogenase B2                   | AM+K_not_in_group |
| Medtr7g057180   | transmembrane protein, putative            | AM+K_not_in_group |
| Medtr6g082000   | poly(A) polymerase-like protein            | AM+K_not_in_group |
| Medtr0013s0150  | DUF3411 domain protein                     | AM+K_not_in_group |
| Medtr1g039990   | 3-dehydroquinate synthase                  | AM+K_not_in_group |
| Medtr1g086050   | protein translocase subunit SecA           | AM+K_not_in_group |
| Medtr1g116270   | glutathione S-transferase                  | AM+K_not_in_group |
| Medtr2g087590   | membrane OMP85 family protein              | AM+K_not_in_group |
| Medtr3g083310   | hypothetical protein                       | AM+K_not_in_group |
| Medtr3g101770   | DCL protein                                | AM+K_not_in_group |
| Medtr3g106560   | cysteinyl-tRNA synthetase                  | AM+K_not_in_group |
| Medtr3g107060   | L-ascorbate peroxidase                     | AM+K_not_in_group |
| Medtr4g005300   | TPR domain protein                         | AM+K_not_in_group |
| Medtr4g032670   | NARE associated family protein             | AM+K_not_in_group |
| Medtr4g071010   | transmembrane protein, putative            | AM+K_not_in_group |
| Medtr4g078130   | transmembrane protein, putative            | AM+K_not_in_group |
| Medtr4g129320   | hypothetical protein                       | AM+K_not_in_group |
| Medtr4g132500   | leucyl-tRNA synthetase                     | AM+K_not_in_group |
| Medtr5g009070   | magnesium chelatase subunit ChlD           | AM+K_not_in_group |
| Medtr5g023090   | ankyrin domain protein                     | AM+K_not_in_group |
| Medtr5g035060   | GNAT family acetyltransferase              | AM+K_not_in_group |
| Medtr7g080430   | peptide chain release factor 2             | AM+K_not_in_group |
| Medtr7g116990   | metal-associated domain protein            | AM+K_not_in_group |
| Medtr8g089550   | terminal protease family protein           | AM+K_not_in_group |
| Medtr1g083840   | gamma ATP-dependent DNA helicase           | AM+K_not_in_group |
| Medtr2g044210   | complex GINS SLD5-like protein             | AM+K_not_in_group |
| Medtr3g072400   | case superfamily protein, putative         | AM+K_not_in_group |
| Medtr4g070800   | hypothetical protein                       | AM+K_not_in_group |
| Medtr4g074330   | nicotianamine-DNA glycosylase-like protein | AM+K_not_in_group |
| Medtr8g080160   | gamma ATP-dependent DNA helicase           | AM+K_not_in_group |
| Medtr8g086640   | core histone H2A/H2B/H3/H4                 | AM+K_not_in_group |
| Medtr2g007210   | amp24/gp25L/p24 family protein             | AM+K_not_in_group |
| Medtr8g088720   | S ferredoxin superfamily protein           | AM+K_not_in_group |
| Medtr7g011170   | transcription factor mixta-like protein    | AM+K_not_in_group |
| Medtr5g080780   | type B catalytic subunit, putative         | AM+K_not_in_group |
| Medtr3g092230   | CDPK-related kinase                        | AM+K_not_in_group |
| Medtr8g100160   | motif 1 in plant MEI2-like protein         | AM+K_not_in_group |
| Medtr3g088040   | chlorophyll A/B-binding protein            | AM+K_not_in_group |
| Medtr1g017870   | phosphatidyl-prolyl cis-trans isomerase    | AM+K_not_in_group |
| Medtr1g115980   | SET domain protein                         | AM+K_not_in_group |
| Medtr2g088700_s | syntaxin of plants 122 protein             | AM+K_not_in_group |
| Medtr6g060670   | DUF296 domain protein                      | AM+K_not_in_group |
| Medtr7g063010   | ectin-domain receptor kinase S.4           | AM+K_not_in_group |
| Medtr1g014690   | alpha-tocopherol methyltransferase         | AM+K_not_in_group |
| Medtr3g076540   | kinase AFC1                                | AM+K_not_in_group |
| Medtr2g436040   | esterase/pectinesterase inhibitor          | AM+K_not_in_group |
| Medtr7g117270   | RNA recognition domain protein             | AM+K_not_in_group |

diffusion\_prioritization\_ALL

|               |                                      |                   |
|---------------|--------------------------------------|-------------------|
| Medtr7g106210 | receptor-kinase-like protein         | AM+K_not_in_group |
| Medtr3g108700 | stochrom, DASH family protein        | AM+K_not_in_group |
| Medtr2g102267 | atomer subunit beta-like protein     | AM+K_not_in_group |
| Medtr3g030620 | F-box associated protein             | AM+K_not_in_group |
| Medtr7g106000 | harpin-induced-like protein          | AM+K_not_in_group |
| Medtr7g109145 | drought-induced protein              | AM+K_not_in_group |
| Medtr1g078110 | subtilisin-like serine protease      | AM+K_not_in_group |
| Medtr4g131760 | benzyltransferase family protein     | AM+K_not_in_group |
| Medtr5g096670 | fructose-bisphosphate aldolase       | AM+K_not_in_group |
| Medtr8g024180 | phosphoprotein 14 kDa protein        | AM+K_not_in_group |
| Medtr3g065630 | hypothetical protein                 | AM+K_not_in_group |
| Medtr4g107040 | dehydrogenase family protein         | AM+K_not_in_group |
| Medtr7g050870 | esterase/pectinesterase inhibitor    | AM+K_not_in_group |
| Medtr7g080530 | colate phosphatase-like protein      | AM+K_in_group     |
| Medtr3g078623 | formin-like 2 domain protein         | AM+K_not_in_group |
| Medtr1g075430 | onal regulator superman protein      | AM+K_not_in_group |
| Medtr3g079380 | hypothetical protein                 | AM+K_not_in_group |
| Medtr3g086030 | hypothetical protein                 | AM+K_not_in_group |
| Medtr4g010530 | stein, putative (other strand read)  | AM+K_not_in_group |
| Medtr5g022420 | rotein interaction domain protein    | AM+K_not_in_group |
| Medtr7g083810 | racting (KIP1-like) family protein   | AM+K_not_in_group |
| Medtr3g016215 | hypothetical protein                 | AM+K_not_in_group |
| Medtr4g045810 | beta-ocimene/myrcene synthase        | AM+K_not_in_group |
| Medtr5g036310 | matrixin family protein              | AM+K_not_in_group |
| Medtr6g075870 | ce protein (TIR-NBS-LRR class)       | AM+K_not_in_group |
| Medtr8g007040 | patatin-like phospholipase           | AM+K_not_in_group |
| Medtr8g016440 | 1 (TIR-NBS-LRR class), putative      | AM+K_not_in_group |
| Medtr1g043770 | yclopropanecarboxylate oxidase       | AM+K_not_in_group |
| Medtr1g054150 | s etical protein (other strand read) | AM+K_not_in_group |
| Medtr4g029550 | extensin-like repeat protein         | AM+K_not_in_group |
| Medtr5g011470 | :-mediated mRNA decay protein        | AM+K_not_in_group |
| Medtr8g104870 | lant cadmium resistance protein      | AM+K_not_in_group |
| Medtr8g088745 | hreonine kinase domain protein       | AM+K_not_in_group |
| Medtr4g073690 | nodulin-like/MFS transporter         | AM+K_not_in_group |
| Medtr4g094492 | reticuline oxidase-like protein      | AM+K_not_in_group |
| Medtr8g072220 | ransmembrane protein, putative       | AM+K_not_in_group |
| Medtr8g098895 | plant/F1M20-13 protein               | AM+K_not_in_group |
| Medtr8g098945 | s VRKY family transcription factor   | AM+K_not_in_group |
| Medtr1g086210 | esterase/pectinesterase inhibitor    | AM+K_not_in_group |
| Medtr1g098430 | methylesterase inhibitor protein     | AM+K_not_in_group |
| Medtr3g088615 | MADS-box transcription factor        | AM+K_not_in_group |
| Medtr4g083210 | L-ascorbate oxidase-like protein     | AM+K_not_in_group |
| Medtr4g088685 | RALF                                 | AM+K_not_in_group |
| Medtr5g006050 | hypothetical protein                 | AM+K_not_in_group |
| Medtr5g033470 | peroxidase family protein            | AM+K_not_in_group |
| Medtr5g038490 | pectate lyase P59-like protein       | AM+K_not_in_group |
| Medtr5g065970 | ransmembrane protein, putative       | AM+K_not_in_group |
| Medtr6g007095 | GDSL-like lipase/acylhydrolase       | AM+K_not_in_group |
| Medtr6g011420 | pectate lyase P59-like protein       | AM+K_not_in_group |
| Medtr7g009390 | pectate lyase P59-like protein       | AM+K_not_in_group |
| Medtr7g032620 | ransmembrane protein, putative       | AM+K_not_in_group |

## diffusion\_prioritization\_ALL

|                |                                     |                   |
|----------------|-------------------------------------|-------------------|
| Medtr7g073150  | Lipid transfer protein              | AM+K_not_in_group |
| Medtr7g079480  | ant protein/LEA protein, putative   | AM+K_not_in_group |
| Medtr3g088795  | staygreen protein                   | AM+K_not_in_group |
| Medtr4g124030  | DNA-directed RNA polymerase         | AM+K_not_in_group |
| Medtr1g069785  | dent methyltransferase, putative    | AM+K_not_in_group |
| Medtr6g015965  | ransmembrane protein, putative      | AM+K_not_in_group |
| Medtr1g116930  | peptide/nitrate transporter         | AM+K_not_in_group |
| Medtr0083s0100 | ess up-regulated Nod 19 protein     | AM+K_not_in_group |
| Medtr3g067437  | albumin I                           | AM+K_not_in_group |
| Medtr2g101320  | ankyrin repeat plant-like protein   | AM+K_not_in_group |
| Medtr3g012440  | CXE carboxylesterase                | AM+K_not_in_group |
| Medtr3g095040  | WRKY family transcription factor    | AM+K_not_in_group |
| Medtr7g080370  | calreticulin                        | AM+K_not_in_group |
| Medtr8g074610  | F-box protein                       | AM+K_not_in_group |
| Medtr1g069320  | pfkB family carbohydrate kinase     | AM+K_not_in_group |
| Medtr4g071880  | ie-bisphosphate aldolase class I    | AM+K_not_in_group |
| Medtr4g083080  | alpha/beta fold hydrolase           | AM+K_not_in_group |
| Medtr8g010120  | alpha/beta fold hydrolase           | AM+K_not_in_group |
| Medtr8g066975  | /acylcarnitine carrier-like protein | AM+K_not_in_group |
| Medtr8g096960  | nsive A/B barrel domain protein     | AM+K_not_in_group |
| Medtr4g058910  | ranscription factor family protein  | AM+K_not_in_group |
| Medtr7g033325  | osaminyltransferase-like protein    | AM+K_in_group     |
| Medtr4g108170  | ABC transporter A family protein    | AM+K_not_in_group |
| Medtr2g044070  | sucrose synthase                    | AM+K_not_in_group |
| Medtr4g055130  | ransmembrane protein, putative      | AM+K_not_in_group |
| Medtr2g021330  | MAP kinase-like protein             | AM+K_not_in_group |
| Medtr5g010010  | l 2,4-cyclodiphosphate synthase     | AM+K_not_in_group |
| Medtr3g045180  | Cyclin 4                            | AM+K_not_in_group |
| Medtr4g098660  | icopeptide (PPR) repeat protein     | AM+K_not_in_group |
| Medtr6g083200  | ase / Hevein / PR-4 / Wheatwin2     | AM+K_not_in_group |
| Medtr8g020920  | s_r-like kinase (other strand read) | AM+K_not_in_group |
| Medtr3g080830  | embrane receptor family protein     | AM+K_not_in_group |
| Medtr8g075980  | Defensin MtDef4.5                   | AM+K_not_in_group |
| Medtr2g069210  | -carboxylate oxidase-like protein   | AM+K_not_in_group |
| Medtr3g436010  | BZIP transcription factor           | AM+K_not_in_group |
| Medtr8g023830  | ase/phosphatase family protein      | AM+K_not_in_group |
| Medtr1g064240  | le-gated ion channel-like protein   | AM+K_not_in_group |
| Medtr2g101140  | DUF1677 family protein              | AM+K_not_in_group |
| Medtr7g118080  | subtilisin-like serine protease     | AM+K_not_in_group |
| Medtr1g059690  | OS ribosomal L40 fusion protein     | AM+K_not_in_group |
| Medtr1g114200  | 50S ribosomal L18-like protein      | AM+K_not_in_group |
| Medtr4g063060  | 60S ribosomal protein L23a-2        | AM+K_not_in_group |
| Medtr1g111740  | cationic amino acid transporter     | AM+K_not_in_group |
| Medtr4g104510  | o acid transporter family protein   | AM+K_not_in_group |
| Medtr4g094615  | Serine/Threonine-kinase rio2        | AM+K_not_in_group |
| Medtr3g092980  | associated complex alpha chain      | AM+K_not_in_group |
| Medtr8g088740  | /Threonine kinase family protein    | AM+K_not_in_group |
| Medtr8g031030  | LRR receptor-like kinase            | AM+K_not_in_group |
| Medtr4g092790  | esium-efflux system protein kefB    | AM+K_not_in_group |
| Medtr2g042480  | ine Rich Peptide MtNodGRP2A         | AM+K_not_in_group |
| Medtr3g103440  | ne-Rich (NCR) secreted peptide      | AM+K_not_in_group |

## diffusion\_prioritization\_ALL

|               |                                     |                   |
|---------------|-------------------------------------|-------------------|
| Medtr3g415590 | early nodulin protein               | AM+K_not_in_group |
| Medtr4g060590 | ne-Rich (NCR) secreted peptide      | AM+K_not_in_group |
| Medtr4g070690 | ne-Rich (NCR) secreted peptide      | AM+K_not_in_group |
| Medtr4g094352 | IA-like transporter family protein  | AM+K_not_in_group |
| Medtr7g056523 | LEED...PEED secreted peptide        | AM+K_not_in_group |
| Medtr8g012700 | Defensin-like protein               | AM+K_not_in_group |
| Medtr1g021760 | 30S ribosomal protein S9P           | AM+K_not_in_group |
| Medtr2g015840 | papain family cysteine protease     | AM+K_not_in_group |
| Medtr1g024840 | rotein disulfide-isomerase LQY1     | AM+K_not_in_group |
| Medtr2g075760 | gamma-glutamylhydrolase             | AM+K_not_in_group |
| Medtr4g130800 | plastocyanin-like domain protein    | AM+K_not_in_group |
| Medtr1g061670 | 60S ribosomal protein L24-2         | AM+K_not_in_group |
| Medtr4g068040 | 60S ribosomal protein L38A          | AM+K_not_in_group |
| Medtr4g127160 | carboxy-terminal domain protein     | AM+K_not_in_group |
| Medtr5g037960 | hypothetical protein                | AM+K_not_in_group |
| Medtr5g097320 | heat shock protein 81-2             | AM+K_not_in_group |
| Medtr7g113470 | cpn60 chaperonin family protein     | AM+K_not_in_group |
| Medtr8g099650 | ptional coactivator KELP protein    | AM+K_not_in_group |
| Medtr8g015340 | LRR receptor-like kinase plant      | AM+K_not_in_group |
| Medtr2g030240 | -CoA ligase/peroxisomal protein     | AM+K_not_in_group |
| Medtr3g030860 | photosystem II 5 kDa protein        | AM+K_not_in_group |
| Medtr8g099920 | acyl carrier protein                | AM+K_not_in_group |
| Medtr3g032390 | hypothetical protein                | AM+K_not_in_group |
| Medtr4g050410 | main disease resistance protein     | AM+K_not_in_group |
| Medtr8g010020 | t alkenal double bond reductase     | AM+K_not_in_group |
| Medtr8g062750 | unit 5/RDS3 complex subunit 10      | AM+K_not_in_group |
| Medtr8g086120 | carrier protein                     | AM+K_not_in_group |
| Medtr2g072470 | solaneyl diphosphate synthase       | AM+K_not_in_group |
| Medtr3g115110 | c metalloprotease FTSH protein      | AM+K_not_in_group |
| Medtr5g076620 | squalene/phytoene synthase          | AM+K_not_in_group |
| Medtr1g011510 | r cluster-binding domain protein    | AM+K_not_in_group |
| Medtr1g017450 | ransmembrane protein, putative      | AM+K_not_in_group |
| Medtr1g018030 | l-acyltransferase domain protein    | AM+K_not_in_group |
| Medtr1g048970 | lpha-carbinolamine dehydratase      | AM+K_not_in_group |
| Medtr1g054070 | plastid lipid-associated protein    | AM+K_not_in_group |
| Medtr1g076840 | -like cupins superfamily protein    | AM+K_not_in_group |
| Medtr1g105090 | 1-cys peroxiredoxin PER1            | AM+K_not_in_group |
| Medtr2g019140 | protease Do-like protein            | AM+K_not_in_group |
| Medtr2g023290 | 1 ATP synthase subunit gamma        | AM+K_not_in_group |
| Medtr2g032540 | ibose-5-phosphate isomerase A       | AM+K_not_in_group |
| Medtr2g066110 | phoglycerate kinase-like protein    | AM+K_not_in_group |
| Medtr2g082410 | 50S ribosomal L24-like protein      | AM+K_not_in_group |
| Medtr2g088860 | cyclin p4                           | AM+K_not_in_group |
| Medtr2g101380 | r cluster-binding domain protein    | AM+K_not_in_group |
| Medtr2g101430 | DUF3820 family protein              | AM+K_not_in_group |
| Medtr3g053230 | e synthetase associated protein     | AM+K_not_in_group |
| Medtr3g060750 | ptidyl-prolyl cis-trans isomerase   | AM+K_not_in_group |
| Medtr3g061480 | ransmembrane protein, putative      | AM+K_not_in_group |
| Medtr3g072330 | roporphyrinogen decarboxylase       | AM+K_not_in_group |
| Medtr3g074050 | dylinositol transfer family protein | AM+K_not_in_group |
| Medtr3g076660 | elongation factor Tu protein        | AM+K_not_in_group |

diffusion\_prioritization\_ALL

|                                                                 |                   |
|-----------------------------------------------------------------|-------------------|
| Medtr3g084860 S1 RNA-binding domain protein                     | AM+K_not_in_group |
| Medtr3g089065 thioredoxin M-type protein                        | AM+K_not_in_group |
| Medtr3g092040 phosphatase superfamily protein                   | AM+K_not_in_group |
| Medtr3g096290 bacterial and plant NDH-1 subunit O               | AM+K_not_in_group |
| Medtr3g101670 chlorophyll A/B-binding protein                   | AM+K_not_in_group |
| Medtr3g104980 terminal domain protein, putative                 | AM+K_not_in_group |
| Medtr3g105050 hypothetical protein                              | AM+K_not_in_group |
| Medtr3g116110 cleavage center PsbP family protein               | AM+K_not_in_group |
| Medtr4g007910 hypothetical protein                              | AM+K_not_in_group |
| Medtr4g010140 chlorophyll fluorescence increase                 | AM+K_not_in_group |
| Medtr4g013200 phosphoprotein 14 kDa protein                     | AM+K_not_in_group |
| Medtr4g021210 carboxylase/oxygenase activase                    | AM+K_not_in_group |
| Medtr4g032805 C-terminal domain protein                         | AM+K_not_in_group |
| Medtr4g055260 phosphate (CA1P) phosphatase                      | AM+K_not_in_group |
| Medtr4g064750 highly transcriptionally active protein           | AM+K_not_in_group |
| Medtr4g088350 phosphate/phosphate translocator                  | AM+K_not_in_group |
| Medtr4g092690 cytosomal malate dehydrogenase                    | AM+K_not_in_group |
| Medtr4g093560 independent phosphatase-like protein              | AM+K_not_in_group |
| Medtr5g008750 Rieske (2Fe-2S) domain protein                    | AM+K_not_in_group |
| Medtr5g011460 ycf49-like protein                                | AM+K_not_in_group |
| Medtr5g012110 thylakoid lumenal protein                         | AM+K_not_in_group |
| Medtr5g013300 50S ribosomal protein L19-2                       | AM+K_not_in_group |
| Medtr5g018590 [323670] TAIR;Acc:AT2G23670]                      | AM+K_not_in_group |
| Medtr5g029590 plastid fibrillin                                 | AM+K_not_in_group |
| Medtr5g041910 cytochrome-evolving enhancer protein              | AM+K_not_in_group |
| Medtr5g054910 transmembrane protein, putative                   | AM+K_not_in_group |
| Medtr6g007887 [314910] TAIR;Acc:AT5G14910]                      | AM+K_not_in_group |
| Medtr6g017260 plasma membrane slr0575-like protein              | AM+K_not_in_group |
| Medtr6g018310 phosphate carboxylase small chain                 | AM+K_not_in_group |
| Medtr6g035305 phosphatase, cytosolic-like protein               | AM+K_not_in_group |
| Medtr6g086600 nucleotide-binding protein                        | AM+K_not_in_group |
| Medtr7g029290 peroxidase/oxidase/kelch repeat protein           | AM+K_not_in_group |
| Medtr7g032900 methyltransferase type 11                         | AM+K_not_in_group |
| Medtr7g076620 hypothetical protein                              | AM+K_not_in_group |
| Medtr7g080250 thioredoxin                                       | AM+K_not_in_group |
| Medtr7g085490 cytochrome c-like electron flow protein, putative | AM+K_not_in_group |
| Medtr7g108590 TPR repeat protein                                | AM+K_not_in_group |
| Medtr7g109850 nitrogen fixation protein NifU                    | AM+K_not_in_group |
| Medtr7g118290 phosphoprotein 14 kDa protein                     | AM+K_not_in_group |
| Medtr8g024340 granule bound starch synthase                     | AM+K_not_in_group |
| Medtr8g028100 DUF2996 family protein                            | AM+K_not_in_group |
| Medtr8g061350 30S ribosomal protein S20                         | AM+K_not_in_group |
| Medtr8g089610 core complex family psbY protein                  | AM+K_not_in_group |
| Medtr8g099615 hypothetical protein                              | AM+K_not_in_group |
| Medtr8g102980 acetylglutathione lyase-like protein              | AM+K_not_in_group |
| Medtr8g106690 major protein, expressed protein                  | AM+K_not_in_group |
| Medtr2g086610 ribosomal protein S25                             | AM+K_not_in_group |
| Medtr6g043210 ribosomal protein S13P/S18e                       | AM+K_not_in_group |
| Medtr4g098740 LRR receptor-like kinase                          | AM+K_not_in_group |
| Medtr3g019150 cytochrome oxidoreductase-like protein            | AM+K_not_in_group |
| Medtr5g036360 matrix metalloproteinase                          | AM+K_not_in_group |

## diffusion\_prioritization\_ALL

|                                                   |                   |
|---------------------------------------------------|-------------------|
| Medtr6g008620 ochrome P450 family 82 protein      | AM+K_not_in_group |
| Medtr7g012330 ochrome P450 family 71 protein      | AM+K_not_in_group |
| Medtr1g026890 RNA recognition motif protein       | AM+K_not_in_group |
| Medtr2g072530 ox/RNI/FBD-like domain protein      | AM+K_not_in_group |
| Medtr0391s0020 main disease resistance protein    | AM+K_in_group     |
| Medtr2g042340 hypothetical protein                | AM+K_not_in_group |
| Medtr2g438260 hypothetical protein                | AM+K_in_group     |
| Medtr2g438310 hypothetical protein                | AM+K_in_group     |
| Medtr2g438320 hypothetical protein                | AM+K_in_group     |
| Medtr2g438540 hypothetical protein                | AM+K_not_in_group |
| Medtr7g099220 Serine/Threonine-kinase ALE2        | AM+K_not_in_group |
| Medtr4g014750 OTU-like cysteine protease          | AM+K_not_in_group |
| Medtr7g020870 ike DNA-binding domain protein      | AM+K_not_in_group |
| Medtr3g020680 50S ribosomal protein L27           | AM+K_not_in_group |
| Medtr4g068190 ptidyl-prolyl cis-trans isomerase   | AM+K_not_in_group |
| Medtr4g068280 igger factor-like protein, putative | AM+K_not_in_group |
| Medtr4g075040 tability/assembly factor HCF136     | AM+K_not_in_group |
| Medtr5g030020 1/RBD/RNP motif) family protein     | AM+K_not_in_group |
| Medtr6g006060 50S ribosomal protein L7/L12        | AM+K_not_in_group |
| Medtr7g084160 y of complex protein C, putative    | AM+K_not_in_group |
| Medtr8g032260 plant/T32A16-60 protein             | AM+K_not_in_group |
| Medtr8g054450 50S ribosomal protein L13           | AM+K_not_in_group |
| Medtr3g015420 stein, putative (other strand read) | AM+K_not_in_group |
| Medtr1g062630 allergen Pru protein, putative      | AM+K_not_in_group |
| Medtr2g438760 ankyrin repeat plant-like protein   | AM+K_not_in_group |
| Medtr4g092530 e kinase family protein, putative   | AM+K_not_in_group |
| Medtr1g066460 syntaxin of plants protein          | AM+K_not_in_group |
| Medtr4g111720 ptidyl-prolyl cis-trans isomerase   | AM+K_not_in_group |
| Medtr5g082260 M50 family peptidase                | AM+K_not_in_group |
| Medtr5g019920 plant/T3A5-60 protein               | AM+K_not_in_group |
| Medtr1g080500 sylaminoimidazole carboxylase       | AM+K_not_in_group |
| Medtr5g057990 alpha-glucosidase                   | AM+K_not_in_group |
| Medtr2g064840 translation initiation factor IF-2  | AM+K_not_in_group |
| Medtr5g035750 DUF1262 family protein              | AM+K_not_in_group |
| Medtr1g026380 prolyl oligopeptidase-like protein  | AM+K_not_in_group |
| Medtr1g083110 ction center PspP family protein    | AM+K_not_in_group |
| Medtr2g031560 reticuline oxidase-like protein     | AM+K_not_in_group |
| Medtr2g072250 chrome P450 family 709 protein      | AM+K_not_in_group |
| Medtr2g461290 adenylate kinase                    | AM+K_not_in_group |
| Medtr3g007970 zylic ether reductase-like protein  | AM+K_not_in_group |
| Medtr4g009620 UPF0481 plant-like protein          | AM+K_not_in_group |
| Medtr4g094985 c-transporting ATPase, putative     | AM+K_not_in_group |
| Medtr4g116350 lrorespiratory reduction protein    | AM+K_not_in_group |
| Medtr4g132690 hypothetical protein                | AM+K_not_in_group |
| Medtr5g070210 aprenyl pyrophosphate synthase      | AM+K_not_in_group |
| Medtr5g084240 nsition metal ion-binding protein   | AM+K_not_in_group |
| Medtr6g042030 ransmembrane protein, putative      | AM+K_not_in_group |
| Medtr7g033230 -like acyl-esterase family protein  | AM+K_not_in_group |
| Medtr7g067340 oup 1 family glycosyltransferase    | AM+K_not_in_group |
| Medtr7g081270 termination factor family protein   | AM+K_not_in_group |
| Medtr7g090140 hydroxylase superfamily protein     | AM+K_not_in_group |

## diffusion\_prioritization\_ALL

|                |                                   |                   |
|----------------|-----------------------------------|-------------------|
| Medtr7g114490  | yl alcohol O-benzoyltransferase   | AM+K_not_in_group |
| Medtr7g118130  | hypothetical protein              | AM+K_not_in_group |
| Medtr8g009170  | -carboxylate oxidase-like protein | AM+K_not_in_group |
| Medtr8g012565  | 5-phosphate reductoisomerase      | AM+K_not_in_group |
| Medtr8g055860  | inase substrate protein, putative | AM+K_not_in_group |
| Medtr3g083970  | lated in metastasis)-like protein | AM+K_not_in_group |
| Medtr4g105700  | transducin/WD40 repeat protein    | AM+K_not_in_group |
| Medtr2g103280  | l carrier acetyl-CoA carboxylase  | AM+K_not_in_group |
| Medtr3g092990  | peroxidase family protein         | AM+K_not_in_group |
| Medtr4g021800  | cid dehalogenase-like hydrolase   | AM+K_not_in_group |
| Medtr5g047260  | CT domain protein which protein   | AM+K_not_in_group |
| Medtr8g075420  | lanese-related sulfurtransferase  | AM+K_not_in_group |
| Medtr1g100305  | )-binding rossmann-fold protein   | AM+K_not_in_group |
| Medtr3g070100  | loheptulose-1,7-bisphosphatase    | AM+K_not_in_group |
| Medtr3g104950  | ultraviolet-B-repressible protein | AM+K_not_in_group |
| Medtr4g072770  | auxin-responsive family protein   | AM+K_not_in_group |
| Medtr6g006990  | arbonic anhydrase family protein  | AM+K_not_in_group |
| Medtr6g011880  | l chlorophyll A/B-binding protein | AM+K_not_in_group |
| Medtr6g012080  | l chlorophyll A/B-binding protein | AM+K_not_in_group |
| Medtr7g110130  | chain dehydrogenase/reductase     | AM+K_not_in_group |
| Medtr8g064610  | rogenase family oxidoreductase    | AM+K_not_in_group |
| Medtr2g092980  | inase kinase kinase-like protein  | AM+K_not_in_group |
| Medtr1g045520  | ransmembrane protein, putative    | AM+K_not_in_group |
| Medtr8g107250  | tubulin                           | AM+K_not_in_group |
| Medtr0017s0100 | affeic acid O-methyltransferase   | AM+K_not_in_group |
| Medtr0240s0040 | ne-Rich (NCR) secreted peptide    | AM+K_not_in_group |
| Medtr1g011540  | ProtKB/Swiss-Prot;Acc:P27993]     | AM+K_not_in_group |
| Medtr1g021955  | PR containing plant-like protein  | AM+K_not_in_group |
| Medtr1g042940  | ne-Rich (NCR) secreted peptide    | AM+K_not_in_group |
| Medtr1g054635  | acyl-CoA reductase-like protein   | AM+K_not_in_group |
| Medtr1g074410  | ransmembrane protein, putative    | AM+K_not_in_group |
| Medtr2g043880  | ile-specific Glycine Rich Peptide | AM+K_not_in_group |
| Medtr2g045290  | ne-Rich (NCR) secreted peptide    | AM+K_not_in_group |
| Medtr2g094170  | ransmembrane protein, putative    | AM+K_not_in_group |
| Medtr2g103313  | embryo-specific protein           | AM+K_not_in_group |
| Medtr3g055440  | nodulin-25 protein                | AM+K_not_in_group |
| Medtr4g048520  | ne-Rich (NCR) secreted peptide    | AM+K_not_in_group |
| Medtr4g056360  | gume lectin beta domain protein   | AM+K_not_in_group |
| Medtr4g065720  | ne-Rich (NCR) secreted peptide    | AM+K_not_in_group |
| Medtr4g085800  | odiesterase superfamily protein   | AM+K_not_in_group |
| Medtr4g094338  | hypothetical protein              | AM+K_not_in_group |
| Medtr5g054980  | late nodulin                      | AM+K_not_in_group |
| Medtr5g084210  | ine Rich Peptide MtNodGRP1C       | AM+K_not_in_group |
| Medtr5g084670  | ile-specific Glycine Rich Peptide | AM+K_not_in_group |
| Medtr7g063220  | -I2 and C2HC zinc finger protein  | AM+K_not_in_group |
| Medtr7g098220  | peptide transporter               | AM+K_not_in_group |
| Medtr7g099870  | annel regulatory protein UNC-93   | AM+K_not_in_group |
| Medtr7g100340  | hypothetical protein              | AM+K_not_in_group |
| Medtr7g102170  | ne-Rich (NCR) secreted peptide    | AM+K_not_in_group |
| Medtr7g114880  | MtN26                             | AM+K_not_in_group |
| Medtr8g036075  | id calcium-binding family protein | AM+K_not_in_group |



diffusion\_prioritization\_ALL

|                                                      |                   |
|------------------------------------------------------|-------------------|
| Medtr3g450180 ne-Rich (NCR) secreted peptide         | AM+K_not_in_group |
| Medtr4g053210 late nodulin                           | AM+K_not_in_group |
| Medtr7g045910 ne-Rich (NCR) secreted peptide         | AM+K_not_in_group |
| Medtr7g056527 LEED...PEED secreted peptide           | AM+K_not_in_group |
| Medtr8g056870 Defensin-like protein                  | AM+K_not_in_group |
| Medtr8g075610 te hydroxycinnamoyltransferase         | AM+K_not_in_group |
| Medtr1g105750 rich receptor-kinase-like protein      | AM+K_not_in_group |
| Medtr0004s0130 uent of cell wall protein, putative   | AM+K_not_in_group |
| Medtr1g050340 il corepressor leunig-like protein     | AM+K_not_in_group |
| Medtr1g100090 plant/F6N7-3 protein, putative         | AM+K_not_in_group |
| Medtr4g109420 ;phoprotein-like protein, putative     | AM+K_not_in_group |
| Medtr4g116370 .ein ubiquitin-like domain protein     | AM+K_not_in_group |
| Medtr5g004660 superkiller-like protein               | AM+K_not_in_group |
| Medtr5g010300 r jumonji (JmjC) domain protein        | AM+K_not_in_group |
| Medtr5g021430 embrane and coiled-coil protein        | AM+K_not_in_group |
| Medtr5g040710 side phosphatase family protein        | AM+K_not_in_group |
| Medtr7g072310 ENTH/VHS/GAT family protein            | AM+K_not_in_group |
| Medtr7g096680 autophagy 9 (APG9) protein             | AM+K_not_in_group |
| Medtr7g103840 ENTH/VHS-like protein                  | AM+K_not_in_group |
| Medtr8g030800 l transcription mediators protein      | AM+K_not_in_group |
| Medtr4g082580 WRKY transcription factor 3            | AM+K_not_in_group |
| Medtr0105s0110 hypothetical protein                  | AM+K_not_in_group |
| Medtr2g023500 toylglutathione lyase-like protein     | AM+K_not_in_group |
| Medtr3g109880 ;/dehydrase and lipid transporter      | AM+K_not_in_group |
| Medtr4g049830 lactone hydrolase family protein       | AM+K_not_in_group |
| Medtr1g031430 receptor-like kinase                   | AM+K_not_in_group |
| Medtr4g076600 porphobilinogen deaminase              | AM+K_not_in_group |
| Medtr5g078780 CCAAT-binding factor                   | AM+K_not_in_group |
| Medtr6g079470 MAP kinase-like protein                | AM+K_not_in_group |
| Medtr8g465150ocus lectin kinase family protein       | AM+K_not_in_group |
| Medtr8g079790 lin-domain kinase CDPK protein         | AM+K_not_in_group |
| Medtr4g122160 in tyrosine kinase family protein      | AM+K_not_in_group |
| Medtr2g047875 rged multivesicular body protein       | AM+K_not_in_group |
| Medtr5g013420 -methyltransferase, suvh protein       | AM+K_not_in_group |
| Medtr3g058530 eucyl-tRNA synthetase, putative        | AM+K_not_in_group |
| Medtr4g079320 x ATP-dependent RNA helicase           | AM+K_not_in_group |
| Medtr4g079360 GTP-binding protein TypA/BipA          | AM+K_not_in_group |
| Medtr4g132120 ie-synthesizing 2/3/4-like protein     | AM+K_not_in_group |
| Medtr5g088200 LA RNA-binding domain protein          | AM+K_not_in_group |
| Medtr7g017440 osin group485 secreted peptide         | AM+K_not_in_group |
| Medtr7g080730 ller viralicidic activity-like protein | AM+K_not_in_group |
| Medtr7g100820 x ATP-dependent RNA helicase           | AM+K_not_in_group |
| Medtr4g123870 Pti1-like kinase                       | AM+K_not_in_group |
| Medtr1g050462 Na+-bile acid cotransporter            | AM+K_not_in_group |
| Medtr4g099340 light harvesting-like protein          | AM+K_not_in_group |
| Medtr6g084580 syntaxin-81 protein                    | AM+K_not_in_group |
| Medtr8g011080 c amino-terminal domain protein        | AM+K_not_in_group |
| Medtr7g451440 ke protease p20 domain protein         | AM+K_not_in_group |
| Medtr6g092630 ie-dependent methyltransferase         | AM+K_not_in_group |
| Medtr7g082660 movement impaired-like protein         | AM+K_not_in_group |
| Medtr1g079763 plant/MNJ8-150 protein                 | AM+K_not_in_group |

## diffusion\_prioritization\_ALL

|               |                                       |                   |
|---------------|---------------------------------------|-------------------|
| Medtr1g086340 | dehydrase and lipid transporter       | AM+K_not_in_group |
| Medtr1g107165 | hypothetical protein                  | AM+K_not_in_group |
| Medtr2g101400 | effect modulator 3) family protein    | AM+K_not_in_group |
| Medtr3g041700 | hydroxymethylglutaryl-CoA lyase       | AM+K_not_in_group |
| Medtr3g051220 | in-conjugating enzyme, putative       | AM+K_not_in_group |
| Medtr3g088870 | umarate:CoA ligase-like protein       | AM+K_not_in_group |
| Medtr3g111700 | protein-binding protein, putative     | AM+K_not_in_group |
| Medtr4g053420 | -apiose/UDP-D-xylose synthase         | AM+K_not_in_group |
| Medtr4g086130 | P450 family ABA 8'-hydroxylase        | AM+K_not_in_group |
| Medtr4g113750 | transmembrane protein, putative       | AM+K_not_in_group |
| Medtr5g033230 | ate-glyoxylate aminotransferase       | AM+K_not_in_group |
| Medtr5g090650 | yanidin 3-O-glucosyltransferase       | AM+K_not_in_group |
| Medtr5g090780 | squalene/phytoene synthase            | AM+K_not_in_group |
| Medtr6g005480 | plastid phosphate translocator        | AM+K_not_in_group |
| Medtr7g073990 | cetyltransferase NSI-like protein     | AM+K_not_in_group |
| Medtr7g074820 | dihydroflavonol reductase             | AM+K_not_in_group |
| Medtr8g009840 | renal double bond reductase P2        | AM+K_not_in_group |
| Medtr8g070840 | NDER BLUE LIGHT-like protein          | AM+K_not_in_group |
| Medtr8g104460 | hypothetical protein                  | AM+K_not_in_group |
| Medtr8g465870 | lycopene beta/epsilon cyclase         | AM+K_not_in_group |
| Medtr8g038220 | annexin D8                            | AM+K_not_in_group |
| Medtr1g057270 | embryogenesis abundant protein        | AM+K_not_in_group |
| Medtr2g066200 | protein interaction domain protein    | AM+K_not_in_group |
| Medtr3g093240 | sal-type serine protease inhibitor    | AM+K_not_in_group |
| Medtr3g095800 | PHD zinc finger protein, putative     | AM+K_not_in_group |
| Medtr3g102660 | GASA/GAST/Snakin                      | AM+K_not_in_group |
| Medtr4g014630 | inhibitable lysosomal thiol reductase | AM+K_not_in_group |
| Medtr4g101600 | inhalase-phosphate phosphatase        | AM+K_not_in_group |
| Medtr7g095640 | apoptosis-promoting Bax1 protein      | AM+K_not_in_group |
| Medtr8g070830 | membrane protein, putative            | AM+K_not_in_group |
| Medtr4g067160 | ase GCN2-like protein, putative       | AM+K_not_in_group |
| Medtr3g075440 | ceptor-like kinase family protein     | AM+K_not_in_group |
| Medtr8g093570 | ositol 4-kinase beta-like protein     | AM+K_not_in_group |
| Medtr2g055850 | ndent RNA helicase-like protein       | AM+K_not_in_group |
| Medtr5g020530 | te hydrolase superfamily protein      | AM+K_not_in_group |
| Medtr5g006290 | E-like phosphatase/nucleotidase       | AM+K_not_in_group |
| Medtr1g072890 | RRP12-like protein                    | AM+K_not_in_group |
| Medtr3g079780 | (TIR-NBS-LRR class), putative         | AM+K_not_in_group |
| Medtr2g072840 | MAP kinase-like protein               | AM+K_not_in_group |
| Medtr5g006510 | nsferase (GNAT) domain protein        | AM+K_not_in_group |
| Medtr5g020650 | PR containing plant-like protein      | AM+K_not_in_group |
| Medtr5g043000 | transducin/WD40 repeat protein        | AM+K_not_in_group |
| Medtr8g018350 | c translation initiation factor 4A1   | AM+K_not_in_group |
| Medtr8g081120 | ase:glucosyltransferase, putative     | AM+K_not_in_group |
| Medtr4g084950 | transmembrane protein, putative       | AM+K_not_in_group |
| Medtr5g017600 | nt kinase inhibitor family protein    | AM+K_not_in_group |
| Medtr6g075440 | nucleotide gated channel protein      | AM+K_not_in_group |
| Medtr7g099260 | TPR repeat protein                    | AM+K_not_in_group |
| Medtr8g078410 | zinc ion-binding protein              | AM+K_not_in_group |
| Medtr1g094660 | nsporter family protein, putative     | AM+K_not_in_group |
| Medtr3g103070 | plasma membrane-type protein          | AM+K_not_in_group |

diffusion\_prioritization\_ALL

|               |                                    |                   |
|---------------|------------------------------------|-------------------|
| Medtr4g019060 | Termination factor NusG, putative  | AM+K_not_in_group |
| Medtr4g131540 | somal protein L10 family protein   | AM+K_not_in_group |
| Medtr7g086100 | plastocyanin-like domain protein   | AM+K_not_in_group |
| Medtr3g095100 | ceptor-like kinase family protein  | AM+K_not_in_group |
| Medtr1g029400 | corepressor SEUSS-like protein     | AM+K_not_in_group |
| Medtr1g072096 | ne-Rich (NCR) secreted peptide     | AM+K_not_in_group |
| Medtr1g116930 | se transporter (other strand read) | AM+K_not_in_group |
| Medtr2g046630 | eted peptide (other strand read)   | AM+K_not_in_group |
| Medtr3g015940 | ne-Rich (NCR) secreted peptide     | AM+K_not_in_group |
| Medtr4g017920 | ne-Rich (NCR) secreted peptide     | AM+K_not_in_group |
| Medtr5g084770 | GDSL-like lipase/acylhydrolase     | AM+K_not_in_group |
| Medtr6g006240 | eted peptide (other strand read)   | AM+K_not_in_group |
| Medtr6g027155 | ne-Rich (NCR) secreted peptide     | AM+K_not_in_group |
| Medtr7g034060 | ne-Rich (NCR) secreted peptide     | AM+K_not_in_group |
| Medtr7g064010 | ne-Rich (NCR) secreted peptide     | AM+K_not_in_group |
| Medtr7g102805 | late nodulin (other strand read)   | AM+K_not_in_group |
| Medtr1g078290 | ctase trans-splicing-like protein  | AM+K_not_in_group |
| Medtr4g098450 | notif DNA-binding family protein   | AM+K_not_in_group |
| Medtr7g082810 | MATE efflux family protein         | AM+K_in_group     |
| Medtr8g105120 | XAP5 circadian timekeeper          | AM+K_not_in_group |
| Medtr3g078000 | reonine-kinase HT1-like protein    | AM+K_not_in_group |
| Medtr6g034930 | hypothetical protein               | AM+K_in_group     |
| Medtr3g011950 | icopeptide (PPR) repeat protein    | AM+K_not_in_group |
| Medtr6g012280 | cription factor HB29-like protein  | AM+K_not_in_group |
| Medtr7g077880 | hypothetical protein               | AM+K_not_in_group |
| Medtr2g096180 | transcription complex subunit 2    | AM+K_not_in_group |
| Medtr5g043430 | DUF863 family protein              | AM+K_not_in_group |
| Medtr3g093120 | FH domain/band 7 family protein    | AM+K_not_in_group |
| Medtr5g096750 | subtilisin-like serine protease    | AM+K_not_in_group |
| Medtr1g114020 | DUF640 family protein              | AM+K_not_in_group |
| Medtr1g026140 | , amino-terminal domain protein    | AM+K_not_in_group |
| Medtr1g041320 | 50S ribosomal protein L28          | AM+K_not_in_group |
| Medtr1g063850 | RNA polymerase sigma factor        | AM+K_not_in_group |
| Medtr1g110750 | 50S ribosomal protein L15          | AM+K_not_in_group |
| Medtr2g036690 | nitrogen fixation protein NifU     | AM+K_not_in_group |
| Medtr3g026020 | plant/F13G24-250 protein           | AM+K_not_in_group |
| Medtr3g068150 | hylakoid lumenal 15 kDa protein    | AM+K_not_in_group |
| Medtr3g073140 | 30S ribosomal protein S13          | AM+K_not_in_group |
| Medtr3g109170 | 324395) TAIR;Acc:AT2G24395]        | AM+K_not_in_group |
| Medtr3g491890 | hylakoid lumenal 17.4 kDa protein  | AM+K_not_in_group |
| Medtr4g006200 | tRNA reductase-binding protein     | AM+K_not_in_group |
| Medtr4g015860 | hosphatase superfamily protein     | AM+K_not_in_group |
| Medtr4g028360 | Lipid transfer protein             | AM+K_not_in_group |
| Medtr4g075710 | cognition particle 43 kDa protein  | AM+K_not_in_group |
| Medtr4g087540 | hypothetical protein               | AM+K_not_in_group |
| Medtr4g133070 | hypothetical protein               | AM+K_not_in_group |
| Medtr5g093240 | hypothetical protein               | AM+K_not_in_group |
| Medtr6g092700 | thioredoxin                        | AM+K_not_in_group |
| Medtr7g088520 | 356910) TAIR;Acc:AT3G56910]        | AM+K_not_in_group |
| Medtr8g078070 | geranyl pyrophosphate synthase     | AM+K_not_in_group |
| Medtr8g090185 | 50S ribosomal protein L29          | AM+K_not_in_group |

diffusion\_prioritization\_ALL

|                                                    |                   |
|----------------------------------------------------|-------------------|
| Medtr1g011680 ase superfamily protein, putative    | AM+K_not_in_group |
| Medtr1g081780 i-binding WIYLD domain protein       | AM+K_not_in_group |
| Medtr2g010420 frigida-LIKE protein                 | AM+K_not_in_group |
| Medtr6g027390 ischel-related homeobox protein      | AM+K_not_in_group |
| Medtr7g076320 olar iron transporter-like protein   | AM+K_not_in_group |
| Medtr1g084720 ABC transporter I family protein     | AM+K_not_in_group |
| Medtr1g098280 l chlorophyll A/B-binding protein    | AM+K_not_in_group |
| Medtr3g090900 RNA polymerase sigma factor          | AM+K_not_in_group |
| Medtr3g094740 ABC transporter-like protein         | AM+K_not_in_group |
| Medtr4g070420 hypothetical protein                 | AM+K_not_in_group |
| Medtr4g094662 c metalloprotease FTSH protein       | AM+K_not_in_group |
| Medtr4g100950 lucuronosyltransferase PGSIP8        | AM+K_not_in_group |
| Medtr5g085250 3 ubiquitin-protein ligase COP1      | AM+K_not_in_group |
| Medtr6g013750 DUF4336 domain protein               | AM+K_not_in_group |
| Medtr4g094468 -protein ligase SINA-like protein    | AM+K_not_in_group |
| Medtr7g066810 NA capping enzyme-like protein       | AM+K_not_in_group |
| Medtr7g010825 stein, putative (other strand read)  | AM+K_not_in_group |
| Medtr0088s0100 arginase family protein             | AM+K_not_in_group |
| Medtr1g025950 hohol dehydrogenase-like protein     | AM+K_not_in_group |
| Medtr3g107700 hypothetical protein                 | AM+K_not_in_group |
| Medtr3g064700 , amino-terminal domain protein      | AM+K_not_in_group |
| Medtr5g035070 -like acyl-esterase family protein   | AM+K_not_in_group |
| Medtr4g089070 se-associated RTF1-like protein      | AM+K_not_in_group |
| Medtr4g094668 -1-phosphate uridylyltransferase     | AM+K_not_in_group |
| Medtr4g110040 3cription factor BIM2-like protein   | AM+K_not_in_group |
| Medtr8g056030 cullin 3B                            | AM+K_not_in_group |
| Medtr7g105670 hypothetical protein                 | AM+K_not_in_group |
| Medtr3g062890 uctase cyanobacterial subunit N      | AM+K_not_in_group |
| Medtr5g090880 e acyl-transferase family protein    | AM+K_not_in_group |
| Medtr6g014186 UDP-glucosyltransferase              | AM+K_not_in_group |
| Medtr5g035640 ransmembrane protein, putative       | AM+K_not_in_group |
| Medtr8g059790 Kunitz type trypsin inhibitor        | AM+K_not_in_group |
| Medtr4g118000 ucosyltransferase family protein     | AM+K_not_in_group |
| Medtr5g031120 gume lectin beta domain protein      | AM+K_not_in_group |
| Medtr5g035650 ransmembrane protein, putative       | AM+K_not_in_group |
| Medtr1g017910 :yst subunit exo70 family protein    | AM+K_not_in_group |
| Medtr2g088700 3 122 protein (other strand read)    | AM+K_not_in_group |
| Medtr2g101190 eodomain leucine zipper protein      | AM+K_not_in_group |
| Medtr5g042590 tic translation initiation factor 2c | AM+K_not_in_group |
| Medtr7g017360 sphatidylinositol 3-and 4-kinase     | AM+K_not_in_group |
| Medtr1g021680 yst complex component SEC3B          | AM+K_not_in_group |
| Medtr6g015265 ceptor-like kinase family protein    | AM+K_not_in_group |
| Medtr4g131390 temperature-induced lipocalin        | AM+K_not_in_group |
| Medtr7g112615 epoxide hydrolase                    | AM+K_not_in_group |
| Medtr1g084140 solute carrier family 40 protein     | AM+K_not_in_group |
| Medtr1g006690 Nup85 nucleoporin protein            | AM+K_not_in_group |
| Medtr1g034210 cription factor VRN1-like protein    | AM+K_not_in_group |
| Medtr1g115215 chromatin remodeling protein         | AM+K_not_in_group |
| Medtr2g007000 box RNA helicase family protein      | AM+K_not_in_group |
| Medtr2g041420 uclear phosphoprotein, putative      | AM+K_not_in_group |
| Medtr3g019025 ator complex subunit-like protein    | AM+K_not_in_group |

diffusion\_prioritization\_ALL

|                |                                    |                   |
|----------------|------------------------------------|-------------------|
| Medtr3g028140  | 1/RBD/RNP motif) family protein    | AM+K_not_in_group |
| Medtr3g097240  | DUF668 family protein              | AM+K_not_in_group |
| Medtr3g102840  | transcription initiation factor    | AM+K_not_in_group |
| Medtr4g037575  | hypothetical protein               | AM+K_not_in_group |
| Medtr7g090960  | DNA helicase INO80-like protein    | AM+K_not_in_group |
| Medtr4g126010  | casein kinase I-like protein       | AM+K_not_in_group |
| Medtr8g471180  | r actin based movement protein     | AM+K_not_in_group |
| Medtr4g124790  | oredoxin-dependent peroxidase      | AM+K_not_in_group |
| Medtr3g118320  | ta-hydrolase superfamily protein   | AM+K_not_in_group |
| Medtr1g021230  | myb transcription factor           | AM+K_not_in_group |
| Medtr2g028340  | Tu GTP-binding domain protein      | AM+K_not_in_group |
| Medtr3g056715  | ate adenylyltransferase, putative  | AM+K_not_in_group |
| Medtr3g093180  | FH domain/band 7 family protein    | AM+K_not_in_group |
| Medtr4g009980  | ubiquitin-60S ribosomal protein    | AM+K_not_in_group |
| Medtr4g040410  | PR containing plant-like protein   | AM+K_not_in_group |
| Medtr5g017050  | horibosyltransferase-like protein  | AM+K_not_in_group |
| Medtr5g086690  | 1 (TIR-NBS-LRR class), putative    | AM+K_not_in_group |
| Medtr6g046583  | ransmembrane protein, putative     | AM+K_not_in_group |
| Medtr7g055890  | hypothetical protein               | AM+K_not_in_group |
| Medtr8g038200  | GRF zinc finger protein            | AM+K_not_in_group |
| Medtr8g070590  | GRF zinc finger protein            | AM+K_not_in_group |
| Medtr8g076010  | RNI superfamily protein, putative  | AM+K_not_in_group |
| Medtr8g077280  | hypothetical protein               | AM+K_not_in_group |
| Medtr0110s0010 | ransmembrane protein, putative     | AM+K_not_in_group |
| Medtr1g100753  | i-phosphate isomerase, putative    | AM+K_not_in_group |
| Medtr2g036780  | e acyl-transferase family protein  | AM+K_not_in_group |
| Medtr2g038720  | ranscription factor family protein | AM+K_not_in_group |
| Medtr2g042430  | embrane-associated-like protein    | AM+K_not_in_group |
| Medtr2g087740  | tion factor YABBY family protein   | AM+K_not_in_group |
| Medtr4g050300  | tion factor YABBY family protein   | AM+K_not_in_group |
| Medtr4g065040  | le dehydrogenase family protein    | AM+K_not_in_group |
| Medtr4g114730  | tion factor YABBY family protein   | AM+K_not_in_group |
| Medtr4g117280  | / membrane slr0305-like protein    | AM+K_not_in_group |
| Medtr5g032600  | ox domain, ZF-HD class protein     | AM+K_not_in_group |
| Medtr5g065440  | ox domain, ZF-HD class protein     | AM+K_not_in_group |
| Medtr5g091100  | hypothetical protein               | AM+K_not_in_group |
| Medtr6g038640  | D-binding rossmann fold protein    | AM+K_not_in_group |
| Medtr8g027465  | omain class transcription factor   | AM+K_not_in_group |
| Medtr4g091490  | myb transcription factor           | AM+K_not_in_group |
| Medtr4g130690  | 2 type zf-met: zinc-finger protein | AM+K_not_in_group |
| Medtr6g015775  | ce protein (TIR-NBS-LRR class)     | AM+K_not_in_group |
| Medtr7g055970  | 1 (TIR-NBS-LRR class), putative    | AM+K_not_in_group |
| Medtr3g113870  | )-binding rossmann-fold protein    | AM+K_not_in_group |
| Medtr8g104010  | inesis defective protein, putative | AM+K_not_in_group |
| Medtr7g010760  | hypothetical protein               | AM+K_not_in_group |
| Medtr8g061970  | n ABC transporter family protein   | AM+K_not_in_group |
| Medtr1g082430  | ction center PsbP family protein   | AM+K_not_in_group |
| Medtr8g099720  | osomal protein S6 family protein   | AM+K_not_in_group |
| Medtr4g107470  | /l-terminal hydrolase-like protein | AM+K_not_in_group |
| Medtr1g026160  | ke tyrosine kinase family protein  | AM+K_not_in_group |
| Medtr7g061660  | kinase 1B                          | AM+K_not_in_group |

## diffusion\_prioritization\_ALL

|                |                                      |                   |
|----------------|--------------------------------------|-------------------|
| Medtr3g463270  | C2H2-like zinc finger protein        | AM+K_not_in_group |
| Medtr4g087620  | MAP kinase-like Ntf4 protein         | AM+K_not_in_group |
| Medtr7g108340  | cullin 3B                            | AM+K_not_in_group |
| Medtr8g020470  | ransmembrane protein, putative       | AM+K_not_in_group |
| Medtr1g082690  | responsive NPH3 family protein       | AM+K_not_in_group |
| Medtr1g089980  | hypothetical protein                 | AM+K_not_in_group |
| Medtr3g064500  | myb transcription factor             | AM+K_not_in_group |
| Medtr4g094050  | x ABC transporter family protein     | AM+K_not_in_group |
| Medtr7g102450  | ucosyltransferase family protein     | AM+K_not_in_group |
| Medtr8g069820  | ransmembrane protein, putative       | AM+K_not_in_group |
| Medtr3g063240  | nsporter) superfamily permease       | AM+K_not_in_group |
| Medtr4g114320  | substrate carrier family protein     | AM+K_not_in_group |
| Medtr0194s0050 | transcription factor                 | AM+K_not_in_group |
| Medtr1g050700  | ransmembrane protein, putative       | AM+K_not_in_group |
| Medtr1g086585  | insulin-induced protein              | AM+K_not_in_group |
| Medtr1g101030  | tripeptidyl peptidase II             | AM+K_not_in_group |
| Medtr1g102880  | hypothetical protein                 | AM+K_not_in_group |
| Medtr2g461260  | ptidyl-prolyl cis-trans isomerase    | AM+K_not_in_group |
| Medtr3g052480  | GDSL-like lipase/acylhydrolase       | AM+K_not_in_group |
| Medtr3g070380  | ne P450 family monooxygenase         | AM+K_not_in_group |
| Medtr3g107397  | haperon protein P13.9, putative      | AM+K_not_in_group |
| Medtr4g010150  | fatty-acid desaturase                | AM+K_not_in_group |
| Medtr4g021875  | hypothetical protein                 | AM+K_not_in_group |
| Medtr4g026200  | ochrome P450 family 71 protein       | AM+K_not_in_group |
| Medtr4g068210  | rane-associated 30 kDa protein       | AM+K_not_in_group |
| Medtr4g101880  | ite transporter/malic acid protein   | AM+K_not_in_group |
| Medtr5g024560  | luxin efflux carrier family protein  | AM+K_not_in_group |
| Medtr5g095540  | ransmembrane protein, putative       | AM+K_not_in_group |
| Medtr7g069710  | DUF688 family protein                | AM+K_not_in_group |
| Medtr7g095920  | beta-carotene isomerase D27          | AM+K_not_in_group |
| Medtr8g069825  | CRS2-associated factor 1             | AM+K_not_in_group |
| Medtr8g093750  | TPR repeat protein                   | AM+K_not_in_group |
| Medtr7g111590  | 60S ribosomal L13-like protein       | AM+K_not_in_group |
| Medtr0093s0090 | sulin related MtN11/16/17 family     | AM+K_not_in_group |
| Medtr0117s0080 | protein for Xklp2) family protein    | AM+K_not_in_group |
| Medtr0174s0090 | ile-specific Glycine Rich Peptide    | AM+K_not_in_group |
| Medtr0386s0010 | ne-Rich (NCR) secreted peptide       | AM+K_not_in_group |
| Medtr0416s0030 | sulin related MtN11/16/17 family     | AM+K_not_in_group |
| Medtr0888s0020 | s eted peptide (other strand read)   | AM+K_not_in_group |
| Medtr1g039435  | ne-Rich (NCR) secreted peptide       | AM+K_not_in_group |
| Medtr1g039445  | cellulose synthase-like protein      | AM+K_not_in_group |
| Medtr1g058880  | ne-Rich (NCR) secreted peptide       | AM+K_not_in_group |
| Medtr1g067410  | e regulator-like protein, putative   | AM+K_not_in_group |
| Medtr1g068630  | IA-like transporter family protein   | AM+K_not_in_group |
| Medtr1g073510  | ne-Rich (NCR) secreted peptide       | AM+K_not_in_group |
| Medtr1g074840  | s etical protein (other strand read) | AM+K_not_in_group |
| Medtr1g092720  | s eted peptide (other strand read)   | AM+K_not_in_group |
| Medtr1g093030  | o acid transporter family protein    | AM+K_not_in_group |
| Medtr1g105075  | fantastic four-like protein          | AM+K_not_in_group |
| Medtr2g042470  | ine Rich Peptide MtNodGRP2D          | AM+K_not_in_group |
| Medtr2g046680  | ne-Rich (NCR) secreted peptide       | AM+K_not_in_group |

## diffusion\_prioritization\_ALL

|                                                    |                   |
|----------------------------------------------------|-------------------|
| Medtr2g054490 ne-Rich (NCR) secreted peptide       | AM+K_not_in_group |
| Medtr2g059035 ne-Rich (NCR) secreted peptide       | AM+K_not_in_group |
| Medtr2g068655 -related thaumatin family protein    | AM+K_not_in_group |
| Medtr2g069245 ile-specific Glycine Rich Peptide    | AM+K_not_in_group |
| Medtr2g069245_s Rich Peptide (other strand read)   | AM+K_not_in_group |
| Medtr2g072780 ne-Rich (NCR) secreted peptide       | AM+K_not_in_group |
| Medtr2g090050 DUF566 family protein                | AM+K_in_group     |
| Medtr2g101410 d wd40 domain protein, putative      | AM+K_not_in_group |
| Medtr2g103570 цsomal signal peptidase subunit      | AM+K_not_in_group |
| Medtr3g012420 1A-like transporter family protein   | AM+K_not_in_group |
| Medtr3g027180 ne-Rich (NCR) secreted peptide       | AM+K_not_in_group |
| Medtr3g027890 complex subunit 3B-like protein      | AM+K_not_in_group |
| Medtr3g033915 ne-Rich (NCR) secreted peptide       | AM+K_not_in_group |
| Medtr3g049800 ransmembrane protein, putative       | AM+K_not_in_group |
| Medtr3g079780_s iss), putative (other strand read) | AM+K_not_in_group |
| Medtr3g098930 or intercellular exchange protein    | AM+K_not_in_group |
| Medtr4g017790 ne-Rich (NCR) secreted peptide       | AM+K_not_in_group |
| Medtr4g035705_s eted peptide (other strand read)   | AM+K_not_in_group |
| Medtr4g060437 ne-Rich (NCR) secreted peptide       | AM+K_not_in_group |
| Medtr4g064893 sion facilitator family transporter  | AM+K_not_in_group |
| Medtr4g069200 Lipid transfer protein               | AM+K_not_in_group |
| Medtr4g088265 ne-Rich (NCR) secreted peptide       | AM+K_not_in_group |
| Medtr4g088285 late nodulin                         | AM+K_not_in_group |
| Medtr4g094325 1olar iron transporter-like protein  | AM+K_not_in_group |
| Medtr4g116040 3 amino-terminal domain protein      | AM+K_not_in_group |
| Medtr4g116050 3 amino-terminal domain protein      | AM+K_not_in_group |
| Medtr4g130790 pectinesterase                       | AM+K_not_in_group |
| Medtr5g008040 odienoate reductase-like protein     | AM+K_not_in_group |
| Medtr5g011950 lipid transfer protein               | AM+K_not_in_group |
| Medtr5g014050 late nodulin                         | AM+K_not_in_group |
| Medtr5g032480 ile-specific Glycine Rich Peptide    | AM+K_not_in_group |
| Medtr5g032490 ile-specific Glycine Rich Peptide    | AM+K_not_in_group |
| Medtr5g037650 ce protein (TIR-NBS-LRR class)       | AM+K_not_in_group |
| Medtr5g045530 ureide permease-like protein         | AM+K_not_in_group |
| Medtr5g061290 seven in absentia family protein     | AM+K_not_in_group |
| Medtr5g072325 ne-Rich (NCR) secreted peptide       | AM+K_not_in_group |
| Medtr5g073580 ne-Rich (NCR) secreted peptide       | AM+K_not_in_group |
| Medtr5g076040_s eted peptide (other strand read)   | AM+K_not_in_group |
| Medtr5g081900 signal peptidase 25 kDa subunit      | AM+K_not_in_group |
| Medtr5g084160 :ine Rich Peptide MtNodGRP1D         | AM+K_not_in_group |
| Medtr5g464350 sulin related MtN11/16/17 family     | AM+K_not_in_group |
| Medtr6g006250_s eted peptide (other strand read)   | AM+K_not_in_group |
| Medtr6g027460 f zinc finger DOF5.2-like protein    | AM+K_not_in_group |
| Medtr6g055700 ne-Rich (NCR) secreted peptide       | AM+K_not_in_group |
| Medtr6g088625_s etical protein (other strand read) | AM+K_not_in_group |
| Medtr6g093180 beta-amyrin synthase                 | AM+K_not_in_group |
| Medtr7g032720 ne-Rich (NCR) secreted peptide       | AM+K_not_in_group |
| Medtr7g033740 ne-Rich (NCR) secreted peptide       | AM+K_not_in_group |
| Medtr7g055933 ne-Rich (NCR) secreted peptide       | AM+K_not_in_group |
| Medtr7g056517 LEED...PEED secreted peptide         | AM+K_not_in_group |
| Medtr7g079300 subtilisin-like serine protease      | AM+K_not_in_group |

diffusion\_prioritization\_ALL

|                |                                      |                   |
|----------------|--------------------------------------|-------------------|
| Medtr7g112490  | phosphatase 2C family protein        | AM+K_not_in_group |
| Medtr8g010280  | Defensin-like protein                | AM+K_not_in_group |
| Medtr8g012660  | Defensin-like protein                | AM+K_not_in_group |
| Medtr8g036830  | ne-Rich (NCR) secreted peptide       | AM+K_not_in_group |
| Medtr8g088230  | α hydrolase superfamily protein      | AM+K_not_in_group |
| Medtr3g099757  | , amino-terminal domain protein      | AM+K_not_in_group |
| Medtr4g088945  | tyrosine kinase family protein       | AM+K_not_in_group |
| Medtr7g089640  | F-box plant-like protein             | AM+K_not_in_group |
| Medtr8g079820  | transducin/WD40 repeat protein       | AM+K_not_in_group |
| Medtr8g103233  | peptide/nitrate transporter plant    | AM+K_not_in_group |
| Medtr3g065710  | ne-Rich (NCR) secreted peptide       | AM+K_not_in_group |
| Medtr3g094730  | ransmembrane protein, putative       | AM+K_not_in_group |
| Medtr4g066070  | ile-specific Glycine Rich Peptide    | AM+K_not_in_group |
| Medtr5g055370  | ne-Rich (NCR) secreted peptide       | AM+K_not_in_group |
| Medtr5g062630  | ne-Rich (NCR) secreted peptide       | AM+K_not_in_group |
| Medtr7g086040  | GRF zinc finger protein              | AM+K_not_in_group |
| Medtr8g016180  | ochrome P450 family 90 protein       | AM+K_not_in_group |
| Medtr8g087710  | protein (MIP) family transporter     | AM+K_not_in_group |
| Medtr4g128240  | methyltransferase family protein     | AM+K_not_in_group |
| Medtr8g096070  | ΓPR repeat region family protein     | AM+K_not_in_group |
| Medtr8g019510  | NAD(P)-binding domain protein        | AM+K_not_in_group |
| Medtr2g073350  | IAD/NADH kinase family protein       | AM+K_not_in_group |
| Medtr8g005870  | βPR containing plant-like protein    | AM+K_not_in_group |
| Medtr8g106670  | MATE efflux family protein           | AM+K_not_in_group |
| Medtr3g082690  | methyltransferase family protein     | AM+K_not_in_group |
| Medtr7g018240  | PPR containing plant protein         | AM+K_not_in_group |
| Medtr6g038670  | receptor-like protein                | AM+K_not_in_group |
| Medtr6g084410  | S1/YhbY (CRM) domain protein         | AM+K_not_in_group |
| Medtr2g014460  | an phosphorylase family protein      | AM+K_not_in_group |
| Medtr3g467550  | x ATP-dependent RNA helicase         | AM+K_not_in_group |
| Medtr5g041210  | alactosyltransferase-like protein    | AM+K_not_in_group |
| Medtr6g005580  | ie-5)-methyltransferase DRM1/2       | AM+K_not_in_group |
| Medtr8g078900  | .responsive NPH3 family protein      | AM+K_not_in_group |
| Medtr7g073380  | WRKY transcription factor            | AM+K_not_in_group |
| Medtr2g436880  | ing-promoting factor-like protein    | AM+K_not_in_group |
| Medtr5g077370  | zinc finger-like protein             | AM+K_not_in_group |
| Medtr6g092970  | sodium transporter HKT1              | AM+K_not_in_group |
| Medtr7g092170  | DIS3-exonuclease-like protein        | AM+K_not_in_group |
| Medtr3g107720  | fyng potassium channel subunit       | AM+K_not_in_group |
| Medtr6g015680  | ce protein (TIR-NBS-LRR class)       | AM+K_not_in_group |
| Medtr6g074820  | ce protein (TIR-NBS-LRR class)       | AM+K_not_in_group |
| Medtr8g018710  | hypothetical protein                 | AM+K_not_in_group |
| Medtr5g015205  | s etical protein (other strand read) | AM+K_not_in_group |
| Medtr2g098440  | r ATP-dependent RNA helicase         | AM+K_not_in_group |
| Medtr3g108660  | itin carboxyl-terminal hydrolase     | AM+K_not_in_group |
| Medtr0200s0050 | acid phosphatase family protein      | AM+K_not_in_group |
| Medtr1g015700  | r anone isomerase family protein     | AM+K_not_in_group |
| Medtr1g031620  | hypothetical protein                 | AM+K_not_in_group |
| Medtr1g034270  | hypothetical protein                 | AM+K_not_in_group |
| Medtr1g083620  | phospholipase D p2-like protein      | AM+K_not_in_group |
| Medtr1g084010  | hypothetical protein                 | AM+K_not_in_group |



diffusion\_prioritization\_ALL

|               |                                   |                   |
|---------------|-----------------------------------|-------------------|
| Medtr2g043710 | ransmembrane protein, putative    | AM+K_not_in_group |
| Medtr2g086300 | ha/beta hydrolase family protein  | AM+K_not_in_group |
| Medtr2g091220 | riboflavin kinase/fmn hydrolase   | AM+K_not_in_group |
| Medtr3g061110 | subtilisin-like serine protease   | AM+K_not_in_group |
| Medtr4g027390 | orus starvation-induced protein   | AM+K_not_in_group |
| Medtr4g114550 | IDS4-like protein                 | AM+K_not_in_group |
| Medtr4g122930 | plant/F25P12-18 protein           | AM+K_not_in_group |
| Medtr4g124850 | ransmembrane protein, putative    | AM+K_not_in_group |
| Medtr7g100540 | thioredoxin-like protein AAED1    | AM+K_not_in_group |
| Medtr2g064460 | protein L1p/L10e family protein   | AM+K_not_in_group |
| Medtr2g079510 | cleolar GTP-binding-like protein  | AM+K_not_in_group |
| Medtr6g011330 | receptor-like kinase plant        | AM+K_not_in_group |
| Medtr1g069640 | hypothetical protein              | AM+K_not_in_group |
| Medtr3g083880 | factor TFIID subunit-like protein | AM+K_not_in_group |
| Medtr4g115400 | BSD domain protein                | AM+K_not_in_group |
| Medtr5g030890 | DNA-binding protein, putative     | AM+K_not_in_group |
| Medtr1g083910 | SART-1 family protein             | AM+K_not_in_group |
| Medtr7g099540 | transcription factor              | AM+K_not_in_group |
| Medtr8g071230 | cyclin-dependent kinase           | AM+K_not_in_group |
| Medtr7g077740 | ransferase subunit P-like protein | AM+K_not_in_group |
| Medtr1g022355 | usion defective protein, putative | AM+K_not_in_group |
| Medtr1g009860 | ine kinase, ABC1 family protein   | AM+K_in_group     |
| Medtr1g059990 | hypothetical protein              | AM+K_not_in_group |
| Medtr1g069750 | family I protein, SmABC1 protein  | AM+K_not_in_group |
| Medtr2g018630 | ose:anthocyanin acyltransferase   | AM+K_not_in_group |
| Medtr3g080840 | D27 family protein, putative      | AM+K_not_in_group |
| Medtr4g011370 | tUVR3-like 6-4 DNA photolyase     | AM+K_not_in_group |
| Medtr4g113090 | bile acid:sodium symporter        | AM+K_not_in_group |
| Medtr5g011780 | CPD photolyase                    | AM+K_not_in_group |
| Medtr5g094600 | ransmembrane protein, putative    | AM+K_not_in_group |
| Medtr6g026940 | chaperone DnaJ domain protein     | AM+K_not_in_group |
| Medtr6g041980 | chain dehydrogenase/reductase     | AM+K_not_in_group |
| Medtr7g115080 | 3DP-D-mannose-3,5-epimerase       | AM+K_not_in_group |
| Medtr6g007787 | BAH domain-containing protein     | AM+K_not_in_group |
| Medtr3g103520 | at shock protein-binding protein  | AM+K_not_in_group |
| Medtr8g027265 | WNK kinase                        | AM+K_not_in_group |
| Medtr8g088190 | plant/F15D2-27 protein            | AM+K_not_in_group |
| Medtr1g076370 | CBL-interacting kinase            | AM+K_not_in_group |
| Medtr3g070500 | ptidyl-prolyl cis-trans isomerase | AM+K_not_in_group |
| Medtr5g020050 | ubiquinone] flavoprotein subunit  | AM+K_not_in_group |
| Medtr4g077803 | , E2 dimerization partner protein | AM+K_not_in_group |
| Medtr8g106090 | THO complex subunit 2             | AM+K_not_in_group |
| Medtr5g088860 | Cyclin 4                          | AM+K_not_in_group |
| Medtr7g090560 | hypothetical protein              | AM+K_in_group     |
| Medtr1g008310 | 3PR containing plant-like protein | AM+K_not_in_group |
| Medtr1g049180 | DUF155 family protein             | AM+K_not_in_group |
| Medtr1g107490 | stress enhanced protein           | AM+K_not_in_group |
| Medtr2g029030 | plant/F7F23-4 protein             | AM+K_not_in_group |
| Medtr3g006290 | apanese-related sulfurtransferase | AM+K_not_in_group |
| Medtr3g084030 | hosphatase superfamily protein    | AM+K_not_in_group |
| Medtr3g449790 | eductase family oxidoreductase    | AM+K_not_in_group |

## diffusion\_prioritization\_ALL

|               |                                      |                   |
|---------------|--------------------------------------|-------------------|
| Medtr4g033475 | ransmembrane protein, putative       | AM+K_not_in_group |
| Medtr4g067320 | salt tolerance-like protein          | AM+K_not_in_group |
| Medtr4g068230 | orn/lys/arg decarboxylase            | AM+K_not_in_group |
| Medtr4g069800 | Clp protease proteolytic protein     | AM+K_not_in_group |
| Medtr6g023320 | methyltransferase family protein     | AM+K_not_in_group |
| Medtr6g088795 | hexokinase                           | AM+K_not_in_group |
| Medtr7g118260 | PRR response regulator               | AM+K_not_in_group |
| Medtr8g102930 | casein kinase I-like protein         | AM+K_not_in_group |
| Medtr1g081260 | plant/T24G3-80 protein               | AM+K_not_in_group |
| Medtr6g032970 | carboxy-terminal region protein      | AM+K_not_in_group |
| Medtr1g045130 | tic translation initiation factor 4E | AM+K_not_in_group |
| Medtr1g097600 | n 2, Ran-binding domain protein      | AM+K_not_in_group |
| Medtr1g100767 | mbrane protein 161AB, putative       | AM+K_not_in_group |
| Medtr2g437960 | mTERF protein                        | AM+K_not_in_group |
| Medtr3g077050 | 60S ribosomal protein L27a-3         | AM+K_not_in_group |
| Medtr4g120340 | stid developmental protein DAG       | AM+K_not_in_group |
| Medtr6g042530 | n 2, Ran-binding domain protein      | AM+K_not_in_group |
| Medtr6g478160 | tion initiation factor eIF3 subunit  | AM+K_not_in_group |
| Medtr2g081600 | ear transcription factor Y protein   | AM+K_not_in_group |
| Medtr7g066070 | Ctr family copper transporter        | AM+K_not_in_group |
| Medtr7g086160 | plastocyanin-like domain protein     | AM+K_not_in_group |
| Medtr8g068030 | gume lectin beta domain protein      | AM+K_not_in_group |
| Medtr7g086090 | plastocyanin-like domain protein     | AM+K_not_in_group |
| Medtr7g115050 | ammonium transporter 1 protein       | AM+K_not_in_group |
| Medtr8g087780 | peptide/nitrate transporter          | AM+K_not_in_group |
| Medtr4g132910 | integrator complex subunit 3         | AM+K_not_in_group |
| Medtr7g075140 | smad/FHA domain protein              | AM+K_not_in_group |
| Medtr1g100335 | )-binding rossmann-fold protein      | AM+K_not_in_group |
| Medtr5g056720 | cytochrome P450 family protein       | AM+K_not_in_group |
| Medtr6g087770 | cytoplasmic dynein light chain       | AM+K_not_in_group |
| Medtr7g005870 | PR containing plant-like protein     | AM+K_not_in_group |
| Medtr7g116340 | ptidyl-prolyl cis-trans isomerase    | AM+K_not_in_group |
| Medtr8g059435 | ptidyl-prolyl cis-trans isomerase    | AM+K_not_in_group |
| Medtr1g054305 | omogentisate phytyltransferase       | AM+K_not_in_group |
| Medtr1g076570 | enzoquinone methyltransferase        | AM+K_not_in_group |
| Medtr1g101400 | dihydrodipicolinate reductase        | AM+K_not_in_group |
| Medtr1g108710 | NAD(P) binding domain protein        | AM+K_not_in_group |
| Medtr1g115410 | ction center PsbP family protein     | AM+K_not_in_group |
| Medtr2g041260 | ultraviolet-B-repressible protein    | AM+K_not_in_group |
| Medtr2g082580 | ygen-evolving enhancer protein       | AM+K_not_in_group |
| Medtr3g033620 | DUF3411 domain protein               | AM+K_not_in_group |
| Medtr3g048950 | 3ln) amidotransferase subunit A      | AM+K_not_in_group |
| Medtr3g077550 | ransmembrane protein, putative       | AM+K_not_in_group |
| Medtr3g083820 | hosphatase superfamily protein       | AM+K_not_in_group |
| Medtr3g099140 | lakoid lumenal 17.9 kDa protein      | AM+K_not_in_group |
| Medtr3g106820 | ATP synthase, F0 subunit B           | AM+K_not_in_group |
| Medtr3g115970 | ptidyl-prolyl cis-trans isomerase    | AM+K_not_in_group |
| Medtr4g015630 | omega-3 fatty acid desaturase        | AM+K_not_in_group |
| Medtr4g071465 | MATE family efflux protein           | AM+K_not_in_group |
| Medtr4g078760 | a (Mpv17/PMP22) family protein       | AM+K_not_in_group |
| Medtr4g098620 | TLD protein                          | AM+K_not_in_group |

diffusion\_prioritization\_ALL

|               |                                                       |                   |
|---------------|-------------------------------------------------------|-------------------|
| Medtr4g129490 | erase (NAT) superfamily protein                       | AM+K_not_in_group |
| Medtr4g130980 | fatty-acid desaturase                                 | AM+K_not_in_group |
| Medtr4g132360 | ycine cleavage system T protein                       | AM+K_not_in_group |
| Medtr5g011220 | PGR5-like protein 1A                                  | AM+K_not_in_group |
| Medtr5g014290 | FeS assembly protein SufD                             | AM+K_not_in_group |
| Medtr5g027220 | plant/K24G6-12 protein                                | AM+K_not_in_group |
| Medtr5g086670 | ransmembrane protein, putative                        | AM+K_not_in_group |
| Medtr6g043740 | 4-dehydrogenase family protein                        | AM+K_not_in_group |
| Medtr7g114900 | ibose-5-phosphate isomerase A                         | AM+K_not_in_group |
| Medtr8g091710 | ABC transporter-like protein                          | AM+K_not_in_group |
| Medtr3g014090 | E3 ubiquitin-protein ligase KEG                       | AM+K_not_in_group |
| Medtr1g014730 | DUF1350 family protein                                | AM+K_not_in_group |
| Medtr1g022450 | 50S ribosomal protein L31                             | AM+K_not_in_group |
| Medtr1g059660 | hypothetical protein                                  | AM+K_not_in_group |
| Medtr1g069240 | int/F16A16-150 protein, putative                      | AM+K_not_in_group |
| Medtr1g071110 | enzoquinone methyltransferase                         | AM+K_not_in_group |
| Medtr1g072170 | ribosome recycling factor                             | AM+K_not_in_group |
| Medtr1g075660 | plastid fibrillin                                     | AM+K_not_in_group |
| Medtr1g088420 | olyase/blue-light receptor PHR2                       | AM+K_not_in_group |
| Medtr2g007300 | plastid lipid-associated protein                      | AM+K_not_in_group |
| Medtr2g020160 | hlorophyllide A 8-vinyl reductase                     | AM+K_not_in_group |
| Medtr2g033020 | 30S ribosomal protein S1                              | AM+K_not_in_group |
| Medtr3g080800 | 50S ribosomal protein L11P                            | AM+K_not_in_group |
| Medtr3g086040 | lant/F12A21-30 protein, putative                      | AM+K_not_in_group |
| Medtr3g089890 | lakoid lumenal 29.8 kDa protein                       | AM+K_not_in_group |
| Medtr3g098520 | electron transporter                                  | AM+K_not_in_group |
| Medtr3g103300 | ol acyltransferase family protein                     | AM+K_not_in_group |
| Medtr3g105100 | YGGT family protein                                   | AM+K_not_in_group |
| Medtr3g111840 | cine carboxyl methyltransferase                       | AM+K_not_in_group |
| Medtr3g115240 | DUF760 family protein                                 | AM+K_not_in_group |
| Medtr4g064963 | Ctr family copper transporter                         | AM+K_not_in_group |
| Medtr4g094785 | ptidyl-prolyl cis-trans isomerase                     | AM+K_not_in_group |
| Medtr4g105610 | O <sub>2</sub> +/MG <sup>2+</sup> efflux protein ApaG | AM+K_not_in_group |
| Medtr4g130300 | 50S ribosomal protein L35                             | AM+K_not_in_group |
| Medtr4g133770 | ransmembrane protein, putative                        | AM+K_not_in_group |
| Medtr4g134780 | All-trans-retinol 13,14-reductase                     | AM+K_not_in_group |
| Medtr5g069990 | le phosphoprotein TSP9 protein                        | AM+K_not_in_group |
| Medtr6g004100 | edoxin reductase, variable chain                      | AM+K_not_in_group |
| Medtr6g008950 | is transcriptional factor, putative                   | AM+K_not_in_group |
| Medtr6g016335 | ATP sulfurylase                                       | AM+K_not_in_group |
| Medtr6g071465 | plant/T1N15-5 protein                                 | AM+K_not_in_group |
| Medtr7g108300 | peptide chain release factor 1                        | AM+K_not_in_group |
| Medtr8g092680 | plastid lipid-associated protein                      | AM+K_not_in_group |
| Medtr5g059880 | inase kinase kinase-like protein                      | AM+K_not_in_group |
| Medtr1g011690 | ig oxidoreductase family protein                      | AM+K_not_in_group |
| Medtr8g102140 | hypothetical protein                                  | AM+K_not_in_group |
| Medtr7g055780 | GRF zinc finger protein                               | AM+K_not_in_group |
| Medtr3g098780 | onjugating enzyme E2, putative                        | AM+K_not_in_group |
| Medtr6g088885 | l,3-beta-glucosidase-like protein                     | AM+K_not_in_group |
| Medtr8g023240 | DUF674 family protein                                 | AM+K_not_in_group |
| Medtr4g107390 | aminoacyl-tRNA synthetase                             | AM+K_not_in_group |

diffusion\_prioritization\_ALL

|                |                                      |                   |
|----------------|--------------------------------------|-------------------|
| Medtr0025s0060 | tripeptidyl peptidase II             | AM+K_not_in_group |
| Medtr1g023050  | BEL1-related homeotic protein        | AM+K_not_in_group |
| Medtr2g011810  | calmodulin-binding protein           | AM+K_not_in_group |
| Medtr2g036900  | family RNA-binding repeat protein    | AM+K_not_in_group |
| Medtr2g098470  | insensitive transcription factor     | AM+K_not_in_group |
| Medtr3g067690  | DegP protease-like protein           | AM+K_not_in_group |
| Medtr3g100390  | carboxy-terminal domain protein      | AM+K_not_in_group |
| Medtr3g118040  | beta-catenin-like repeat protein     | AM+K_not_in_group |
| Medtr4g074640  | alanine-tRNA ligase                  | AM+K_not_in_group |
| Medtr4g076210  | beta-adaptin-like protein            | AM+K_not_in_group |
| Medtr4g099410  | transcription factor-like protein    | AM+K_not_in_group |
| Medtr4g130820  | le-gated ion channel-like protein    | AM+K_not_in_group |
| Medtr7g096060  | metallopeptidase FTSH protein        | AM+K_not_in_group |
| Medtr7g114370  | transducin/WD40 repeat protein       | AM+K_not_in_group |
| Medtr8g069965  | TSL-kinase interacting protein       | AM+K_not_in_group |
| Medtr0148s0050 | class 1 regulatory subunit, putative | AM+K_not_in_group |
| Medtr1g024830  | like DNA-binding domain protein      | AM+K_not_in_group |
| Medtr1g112310  | Sec24-like CEF protein, putative     | AM+K_not_in_group |
| Medtr3g080070  | regulatory B subunit family protein  | AM+K_not_in_group |
| Medtr3g093470  | interacting-like protein, putative   | AM+K_not_in_group |
| Medtr3g100480  | utin carboxy-terminal hydrolase      | AM+K_not_in_group |
| Medtr3g436080  | hypothetical protein                 | AM+K_not_in_group |
| Medtr4g114980  | topless-like protein                 | AM+K_in_group     |
| Medtr5g076920  | autophagy protein Apg5               | AM+K_not_in_group |
| Medtr5g096890  | amine non-lysosomal ceramidase       | AM+K_not_in_group |
| Medtr6g093240  | phosphoglucan, water dikinase        | AM+K_not_in_group |
| Medtr7g067540  | induced RNA-binding motif protein    | AM+K_not_in_group |
| Medtr8g011270  | in transporter Sec23-like protein    | AM+K_not_in_group |
| Medtr2g450210  | Fip1 [V]-like protein                | AM+K_not_in_group |
| Medtr1g080300  | RNA polymerase III RPC4              | AM+K_not_in_group |
| Medtr1g075880  | AGC kinase                           | AM+K_not_in_group |
| Medtr2g036460  | receptor-like kinase                 | AM+K_not_in_group |
| Medtr4g033895  | ene-Rich (NCR) secreted peptide      | AM+K_not_in_group |
| Medtr4g035725  | ene-Rich (NCR) secreted peptide      | AM+K_not_in_group |
| Medtr4g058890  | ine sulfotransferase-like protein    | AM+K_not_in_group |
| Medtr5g098850  | AAA family ATPase                    | AM+K_not_in_group |
| Medtr7g088470  | arabinofuranosidase-like protein     | AM+K_not_in_group |
| Medtr8g036940  | a response-like protein, putative    | AM+K_not_in_group |
| Medtr1g046730  | GDT1-like protein                    | AM+K_not_in_group |
| Medtr3g118290  | RNA polymerase sigma factor          | AM+K_not_in_group |
| Medtr4g131850  | phospholipase A 2A                   | AM+K_not_in_group |
| Medtr1g050690  | inase kinase kinase-like protein     | AM+K_not_in_group |
| Medtr2g005950  | PHD-finger protein                   | AM+K_not_in_group |
| Medtr1g068960  | PR containing plant-like protein     | AM+K_not_in_group |
| Medtr1g080110  | icopeptide (PPR) repeat protein      | AM+K_not_in_group |
| Medtr3g117150  | ript processing protein, putative    | AM+K_not_in_group |
| Medtr4g011040  | peptide deformylase 1A               | AM+K_not_in_group |
| Medtr4g070060  | termination factor family protein    | AM+K_not_in_group |
| Medtr8g091670  | PR containing plant-like protein     | AM+K_not_in_group |
| Medtr1g069200  | ochrome P450 family 72 protein       | AM+K_not_in_group |
| Medtr3g013440  | ription factor radialis-like protein | AM+K_not_in_group |

## diffusion\_prioritization\_ALL

|                                                    |                   |
|----------------------------------------------------|-------------------|
| Medtr5g024580 auxin efflux carrier family protein  | AM+K_not_in_group |
| Medtr5g089390 transporter family protein, putative | AM+K_not_in_group |
| Medtr6g009420 hypothetical protein                 | AM+K_not_in_group |
| Medtr8g012585 ochrome P450 family 82 protein       | AM+K_not_in_group |
| Medtr1g010260 ated receptor kinase-like protein    | AM+K_not_in_group |
| Medtr1g032260 iger (Ran-binding) family protein    | AM+K_not_in_group |
| Medtr5g007250 ³PR containing plant-like protein    | AM+K_not_in_group |
| Medtr7g086640 ucleotide nucleotidyltransferase     | AM+K_not_in_group |
| Medtr1g031780 receptor-like kinase                 | AM+K_not_in_group |
| Medtr1g069290 myosin family XI heavy chain         | AM+K_not_in_group |
| Medtr2g034200 universal stress family protein      | AM+K_not_in_group |
| Medtr2g089190 ransmembrane protein, putative       | AM+K_not_in_group |
| Medtr1g014680 uitin carboxy-terminal hydrolase     | AM+K_not_in_group |
| Medtr1g059610 ucosamine transferase, putative      | AM+K_not_in_group |
| Medtr1g062950 ulatory B subunit family protein     | AM+K_not_in_group |
| Medtr1g069065 e chaperone superfamily protein      | AM+K_not_in_group |
| Medtr1g080470 enase-like, multi-helical protein    | AM+K_not_in_group |
| Medtr1g082870 Rho GTPase-like protein              | AM+K_not_in_group |
| Medtr1g083390 DNA-binding protein, putative        | AM+K_not_in_group |
| Medtr1g090340 hypothetical protein                 | AM+K_not_in_group |
| Medtr1g094980 homannomutase family protein         | AM+K_not_in_group |
| Medtr2g008190 osphatidylserine decarboxylase       | AM+K_not_in_group |
| Medtr2g020620 sa promoter-binding-like protein     | AM+K_not_in_group |
| Medtr2g024440 te hydrolase superfamily protein     | AM+K_not_in_group |
| Medtr2g029960 ratase-associated family protein     | AM+K_not_in_group |
| Medtr2g036510 ose oxidase/kelch repeat protein     | AM+K_not_in_group |
| Medtr2g069500 trypsin family protein               | AM+K_not_in_group |
| Medtr2g093730 E3 SUMO-protein ligase SIZ1          | AM+K_not_in_group |
| Medtr3g005510 nsense transcripts UPF3 protein      | AM+K_not_in_group |
| Medtr3g011440 one-lysine N-methyltransferase       | AM+K_not_in_group |
| Medtr3g055690 beta-(1,2)-xylosyltransferase        | AM+K_not_in_group |
| Medtr3g070390 uclear pore complex-like protein     | AM+K_not_in_group |
| Medtr3g078647 ation initiation factor 2c, putative | AM+K_not_in_group |
| Medtr3g080120 FAM91A1-like protein                 | AM+K_not_in_group |
| Medtr3g088480 SWI/SNF complex protein              | AM+K_not_in_group |
| Medtr3g100280 nsensitive ion channel-like protein  | AM+K_not_in_group |
| Medtr4g061843 ranscription complex subunit 2       | AM+K_not_in_group |
| Medtr4g078780 asome regulatory subunit S2 1B       | AM+K_not_in_group |
| Medtr4g085625 hypothetical protein                 | AM+K_not_in_group |
| Medtr4g090620 atase/shikimate dehydrogenase        | AM+K_not_in_group |
| Medtr4g115350 ion complex subunit-like protein     | AM+K_not_in_group |
| Medtr4g124090 odeling complex ATPase chain         | AM+K_not_in_group |
| Medtr4g134960 kyrin repeat SKIP35-like protein     | AM+K_not_in_group |
| Medtr5g005100 olar-sorting receptor-like protein   | AM+K_not_in_group |
| Medtr5g021150 FG-GAP repeat protein                | AM+K_not_in_group |
| Medtr5g068460 3HC4 type (RING finger) protein      | AM+K_not_in_group |
| Medtr5g077180 pre-mRNA-splicing factor             | AM+K_not_in_group |
| Medtr5g080650 ormation protein GNOM protein        | AM+K_not_in_group |
| Medtr5g091250 ransport complex-like protein        | AM+K_not_in_group |
| Medtr5g097890 or OF AUXIN resistance protein       | AM+K_not_in_group |
| Medtr6g463340 al peptide peptidase-like protein    | AM+K_not_in_group |

diffusion\_prioritization\_ALL

|                |                                       |                   |
|----------------|---------------------------------------|-------------------|
| Medtr7g009740  | isolation factor GUF1-like protein    | AM+K_not_in_group |
| Medtr7g023250  | MAPK phosphatase                      | AM+K_not_in_group |
| Medtr7g083230  | some segregation family protein       | AM+K_not_in_group |
| Medtr7g085350  | OT2/NOT3/NOT5 family protein          | AM+K_not_in_group |
| Medtr7g088890  | BZIP transcription factor             | AM+K_not_in_group |
| Medtr7g096350  | e bHLH-type transcription factor      | AM+K_not_in_group |
| Medtr7g110170  | RING Zn-finger protein                | AM+K_not_in_group |
| Medtr8g009950  | signal transducer, putative           | AM+K_not_in_group |
| Medtr8g021180  | cation calcium exchanger              | AM+K_not_in_group |
| Medtr8g079020  | doxal phosphate-binding protein       | AM+K_not_in_group |
| Medtr8g107280  | outer membrane ofs-like protein       | AM+K_not_in_group |
| Medtr7g055743  | ione-oxidoreductase-like protein      | AM+K_not_in_group |
| Medtr3g460700  | family RNA methylase, putative        | AM+K_not_in_group |
| Medtr5g018550  | hypothetical protein                  | AM+K_not_in_group |
| Medtr1g075900  | dent methyltransferase, putative      | AM+K_not_in_group |
| Medtr1g442840  | dent methyltransferase, putative      | AM+K_not_in_group |
| Medtr3g103500  | xyloglucan glycosyltransferase        | AM+K_not_in_group |
| Medtr3g100470  | notif DNA-binding family protein      | AM+K_not_in_group |
| Medtr3g083500  | erases II transcription subunit 13    | AM+K_not_in_group |
| Medtr4g091080  | lomerase cajal body-like protein      | AM+K_not_in_group |
| Medtr7g065120  | ne inhibitor-like protein, putative   | AM+K_not_in_group |
| Medtr8g088520  | calpain family cysteine protease      | AM+K_not_in_group |
| Medtr7g092940  | s etical protein (other strand read)  | AM+K_not_in_group |
| Medtr0551s0020 | s etical protein (other strand read)  | AM+K_not_in_group |
| Medtr1g109100  | n recognition complex subunit 4       | AM+K_not_in_group |
| Medtr4g083390  | B3 DNA-binding domain protein         | AM+K_not_in_group |
| Medtr4g131940  | associated-like protein, putative     | AM+K_not_in_group |
| Medtr5g040850  | ox/RNI/FBD-like domain protein        | AM+K_not_in_group |
| Medtr8g487680  | hypothetical protein                  | AM+K_not_in_group |
| Medtr8g101300  | ha hydrolase-like domain kinase       | AM+K_not_in_group |
| Medtr8g027685  | isolation initiation factor 3 subunit | AM+K_not_in_group |
| Medtr6g088510  | receptor-like kinase                  | AM+K_not_in_group |
| Medtr5g014560  | (LH) DNA-binding family protein       | AM+K_not_in_group |
| Medtr7g009970  | ceptor-like kinase family protein     | AM+K_not_in_group |
| Medtr7g021090  | ankyrin repeat protein                | AM+K_not_in_group |
| Medtr8g018480  | ce protein (TIR-NBS-LRR class)        | AM+K_not_in_group |
| Medtr8g051600  | Threonine kinase family protein       | AM+K_not_in_group |
| Medtr8g107730  | hypothetical protein                  | AM+K_not_in_group |
| Medtr4g120470  | pumilio-like protein                  | AM+K_not_in_group |
| Medtr7g076230  | periodic tryptophan protein           | AM+K_not_in_group |
| Medtr8g065900  | ed RNA polymerase-like protein        | AM+K_not_in_group |
| Medtr8g101340  | dependent, SK12/DOB1 protein          | AM+K_not_in_group |
| Medtr5g060350  | inase kinase kinase-like protein      | AM+K_not_in_group |
| Medtr3g075540  | hosphatase superfamily protein        | AM+K_not_in_group |
| Medtr0082s0180 | hypothetical protein                  | AM+K_not_in_group |
| Medtr1g010100  | ,-splicing factor cwc-21, putative    | AM+K_not_in_group |
| Medtr1g029680  | wound-responsive family protein       | AM+K_not_in_group |
| Medtr1g061220  | ase/phosphatase family protein        | AM+K_not_in_group |
| Medtr1g078070  | tion factor jumonji family protein    | AM+K_not_in_group |
| Medtr1g080420  | atin remodeling complex subunit       | AM+K_not_in_group |
| Medtr2g031620  | toprim domain protein                 | AM+K_not_in_group |

diffusion\_prioritization\_ALL

|                |                                      |                   |
|----------------|--------------------------------------|-------------------|
| Medtr2g034900  | importin subunit alpha-1b            | AM+K_not_in_group |
| Medtr2g060670  | eracting factor-like phosphatase     | AM+K_not_in_group |
| Medtr3g091280  | hypothetical protein                 | AM+K_not_in_group |
| Medtr3g102830  | lp protease ATP-binding subunit      | AM+K_not_in_group |
| Medtr3g115640  | calcium-binding EF hand protein      | AM+K_not_in_group |
| Medtr3g117330  | n motor catalytic domain protein     | AM+K_not_in_group |
| Medtr4g076030  | Jro-adherence factor A, putative     | AM+K_not_in_group |
| Medtr4g113335  | s etical protein (other strand read) | AM+K_not_in_group |
| Medtr4g125080  | inhibitor heavy chain-like protein   | AM+K_not_in_group |
| Medtr6g015285  | constituent-like protein, putative   | AM+K_not_in_group |
| Medtr6g065790  | GYF domain protein                   | AM+K_not_in_group |
| Medtr7g056603  | d, DNA-binding protein, putative     | AM+K_not_in_group |
| Medtr7g075060  | adillo repeat kinesin-like protein   | AM+K_not_in_group |
| Medtr8g028395  | oup 1 family glycosyltransferase     | AM+K_not_in_group |
| Medtr8g099275  | OP1-interactive protein, putative    | AM+K_not_in_group |
| Medtr1g028600  | inorganic phosphate transporter      | AM+K_not_in_group |
| Medtr1g075550  | PLAC8 family protein                 | AM+K_not_in_group |
| Medtr1g109110  | almitoyl-acyl carrier thioesterase   | AM+K_not_in_group |
| Medtr2g091215  | DUF538 family protein                | AM+K_not_in_group |
| Medtr3g079570  | re carboxypeptidase-like protein     | AM+K_not_in_group |
| Medtr3g086430  | ited protein ABC domain protein      | AM+K_not_in_group |
| Medtr3g107650  | kinesin-associated protein           | AM+K_not_in_group |
| Medtr4g091000  | te-binding module family protein     | AM+K_not_in_group |
| Medtr4g091020  | LysM domain protein                  | AM+K_not_in_group |
| Medtr5g005950  | mbryogenesis abundant protein        | AM+K_not_in_group |
| Medtr5g076900  | , amino-terminal domain protein      | AM+K_not_in_group |
| Medtr5g081780  | :/dehydrase and lipid transporter    | AM+K_not_in_group |
| Medtr7g068600  | ranscription factor family protein   | AM+K_not_in_group |
| Medtr8g012835  | Defensin-like protein                | AM+K_not_in_group |
| Medtr2g098490  | AMP-binding enzyme                   | AM+K_not_in_group |
| Medtr3g008010  | ucosyltransferase family protein     | AM+K_not_in_group |
| Medtr3g079190  | aline non-lysosomal ceramidase       | AM+K_not_in_group |
| Medtr5g014400  | entafoliata 1 transcription factor   | AM+K_not_in_group |
| Medtr5g031030  | legume lectin family protein         | AM+K_not_in_group |
| Medtr5g033070  | hypothetical protein                 | AM+K_not_in_group |
| Medtr5g063930  | protein (MIP) family transporter     | AM+K_not_in_group |
| Medtr6g034940  | cytochrome P450 family protein       | AM+K_not_in_group |
| Medtr8g012885  | Defensin-like protein                | AM+K_not_in_group |
| Medtr0493s0030 | ha/beta hydrolase family protein     | AM+K_not_in_group |
| Medtr1g023760  | calmodulin-binding motif protein     | AM+K_not_in_group |
| Medtr2g033000  | ein phosphatase 2C-like protein      | AM+K_not_in_group |
| Medtr2g073380  | tegral membrane family protein       | AM+K_not_in_group |
| Medtr4g059390  | protein (MIP) family transporter     | AM+K_not_in_group |
| Medtr7g070060  | -like acyl-esterase family protein   | AM+K_not_in_group |
| Medtr8g066850  | s ein, putative (other strand read)  | AM+K_not_in_group |
| Medtr2g069750  | SNARE-associated-like protein        | AM+K_not_in_group |
| Medtr4g021340  | CASP-like protein                    | AM+K_not_in_group |
| Medtr4g130830  | DNase I superfamily protein          | AM+K_not_in_group |
| Medtr8g010140  | ytosis-associated family protein     | AM+K_not_in_group |
| Medtr1g071400  | hylene overproducer-like protein     | AM+K_not_in_group |
| Medtr2g028480  | :hored endo-1,4-beta-glucanase       | AM+K_not_in_group |

## diffusion\_prioritization\_ALL

|                               |                                     |                   |
|-------------------------------|-------------------------------------|-------------------|
| Medtr5g065490                 | ibitor response protein, putative   | AM+K_not_in_group |
| Medtr3g025880                 | 1/RBD/RNP motif) family protein     | AM+K_not_in_group |
| Medtr7g110640                 | in transporter Sec23-like protein   | AM+K_not_in_group |
| Medtr6g009370                 | LRR receptor-like kinase            | AM+K_not_in_group |
| Medtr2g061380                 | glucan synthase-like protein        | AM+K_not_in_group |
| Medtr5g066710                 | -protein ligase UPL1-like protein   | AM+K_not_in_group |
| Medtr2g037720                 | hypothetical protein                | AM+K_not_in_group |
| Medtr4g073620                 | holine transporter family protein   | AM+K_not_in_group |
| Medtr4g093150                 | zein-binding protein                | AM+K_not_in_group |
| Medtr5g036420                 | plant/F10M23-360 protein            | AM+K_not_in_group |
| Medtr7g074190                 | auxin efflux carrier family protein | AM+K_not_in_group |
| Medtr3g100060                 | main LvsC-like protein, putative    | AM+K_not_in_group |
| Medtr8g072250                 | AP-4 complex subunit epsilon        | AM+K_not_in_group |
| Medtr4g060510                 | E3 SUMO-protein ligase SIZ1         | AM+K_not_in_group |
| Medtr4g092920                 | heat shock 70 kDa protein           | AM+K_not_in_group |
| Medtr1g060860                 | phoesterase superfamily protein     | AM+K_not_in_group |
| Medtr4g104070                 | synthesis protein coq-8, putative   | AM+K_not_in_group |
| Medtr8g013930                 | etical protein (other strand read)  | AM+K_not_in_group |
| Medtr2g081500                 | ocus lectin kinase family protein   | AM+K_not_in_group |
| Medtr1g087720                 | DUF761 domain protein               | AM+K_not_in_group |
| Medtr4g130810                 | ransmembrane protein, putative      | AM+K_not_in_group |
| Medtr8g106100                 | LRR receptor-like kinase            | AM+K_not_in_group |
| Medtr5g036083                 | matrixin family protein             | AM+K_not_in_group |
| Medtr7g092230                 | e transporter OPT family protein    | AM+K_not_in_group |
| Medtr0024s022030e/S12e/Gadd45 | family protein                      | AM+K_not_in_group |
| Medtr1g082380                 | rotein translocase family protein   | AM+K_not_in_group |
| Medtr2g101900                 | 60S ribosomal protein L37-1         | AM+K_not_in_group |
| Medtr4g063925                 | r membrane translocase protein      | AM+K_not_in_group |
| Medtr4g064917                 | PR containing plant-like protein    | AM+K_not_in_group |
| Medtr4g100900                 | 40S ribosomal S30-like protein      | AM+K_not_in_group |
| Medtr4g107330                 | 60 kDa inner membrane protein       | AM+K_not_in_group |
| Medtr4g109610                 | eptor subunit TOM5-like protein     | AM+K_not_in_group |
| Medtr5g021800                 | 60S ribosomal L8-like protein       | AM+K_not_in_group |
| Medtr6g036750                 | hypothetical protein                | AM+K_not_in_group |
| Medtr6g053730                 | 60S ribosomal protein L36           | AM+K_not_in_group |
| Medtr6g091630                 | 60S ribosomal protein L31B          | AM+K_not_in_group |
| Medtr7g007290                 | hypothetical protein                | AM+K_not_in_group |
| Medtr7g076530                 | 40S ribosomal S21-like protein      | AM+K_not_in_group |
| Medtr7g089300                 | GroES chaperonin                    | AM+K_not_in_group |
| Medtr7g117410                 | ribosomal protein S18               | AM+K_not_in_group |
| Medtr7g080980                 | otif DNA-binding family protein     | AM+K_not_in_group |
| Medtr8g098715                 | ate cyclase-like protein, putative  | AM+K_not_in_group |
| Medtr6g012990                 | se catalytic subunit alpha KIN11    | AM+K_not_in_group |
| Medtr7g105660                 | hypothetical protein                | AM+K_not_in_group |
| Medtr7g446140                 | ransmembrane protein, putative      | AM+K_not_in_group |
| Medtr4g108940                 | yltransferase (other strand read)   | AM+K_not_in_group |
| Medtr5g090090                 | in helicase-DNA-binding protein     | AM+K_not_in_group |
| Medtr5g034210                 | receptor-like kinase                | AM+K_not_in_group |
| Medtr1g081180                 | trihelix transcription factor       | AM+K_not_in_group |
| Medtr1g117060                 | ceptor Serine/Threonine kinase      | AM+K_not_in_group |
| Medtr2g090245                 | epoxide hydrolase-like protein      | AM+K_not_in_group |



## diffusion\_prioritization\_ALL

|                 |                                                |                   |
|-----------------|------------------------------------------------|-------------------|
| Medtr5g020940   | acid carboxyl methyltransferase                | AM+K_not_in_group |
| Medtr6g046570   | (NBS-LRR class) family protein                 | AM+K_not_in_group |
| Medtr3g052580   | GDSL-like lipase/acylhydrolase                 | AM+K_not_in_group |
| Medtr4g029130   | hypothetical protein                           | AM+K_not_in_group |
| Medtr4g077070   | phospholipase A1                               | AM+K_not_in_group |
| Medtr1g083310   | metal-associated domain protein                | AM+K_not_in_group |
| Medtr1g026840   | ENTH/VHS/GAT family protein                    | AM+K_not_in_group |
| Medtr1g051175   | metal carboxypeptidase-like protein            | AM+K_not_in_group |
| Medtr1g064350_s | finger protein (other strand read)             | AM+K_not_in_group |
| Medtr1g103540_s | protein BT1 (other strand read)                | AM+K_not_in_group |
| Medtr2g015480   | GDSL-like lipase/acylhydrolase                 | AM+K_not_in_group |
| Medtr2g044330_s | secreted peptide (other strand read)           | AM+K_not_in_group |
| Medtr2g072650   | FBD protein                                    | AM+K_not_in_group |
| Medtr2g094620   | phosphatase-binding START domain protein       | AM+K_not_in_group |
| Medtr3g006190   | cytoplasmic membrane protein                   | AM+K_not_in_group |
| Medtr3g021460   | GDSL-like lipase/acylhydrolase                 | AM+K_not_in_group |
| Medtr3g028380   | ne-Rich (NCR) secreted peptide                 | AM+K_not_in_group |
| Medtr3g052090   | hypothetical protein                           | AM+K_not_in_group |
| Medtr3g060942   | hypothetical protein                           | AM+K_not_in_group |
| Medtr3g094830   | DUF617 family protein                          | AM+K_not_in_group |
| Medtr3g117280_s | main protein (other strand read)               | AM+K_not_in_group |
| Medtr3g436830_s | secreted peptide (other strand read)           | AM+K_not_in_group |
| Medtr3g467600_s | family protein (other strand read)             | AM+K_not_in_group |
| Medtr4g027000   | ne-Rich (NCR) secreted peptide                 | AM+K_not_in_group |
| Medtr4g065405   | hypothetical protein                           | AM+K_not_in_group |
| Medtr5g036270   | matrixin family protein                        | AM+K_not_in_group |
| Medtr5g044140   | hypothetical protein                           | AM+K_not_in_group |
| Medtr5g061120_s | secreted peptide (other strand read)           | AM+K_not_in_group |
| Medtr5g063490   | ne-Rich (NCR) secreted peptide                 | AM+K_not_in_group |
| Medtr5g084020_s | Rich Peptide (other strand read)               | AM+K_not_in_group |
| Medtr5g095580   | transmembrane protein, putative                | AM+K_not_in_group |
| Medtr5g095590   | ne-Rich (NCR) secreted peptide                 | AM+K_not_in_group |
| Medtr6g086060   | sphingolipid biosynthesis protein              | AM+K_not_in_group |
| Medtr7g008130_s | secreted peptide (other strand read)           | AM+K_not_in_group |
| Medtr7g011790_s | family protein (other strand read)             | AM+K_not_in_group |
| Medtr7g022640_s | protein, putative (other strand read)          | AM+K_not_in_group |
| Medtr7g031810   | late nodulin                                   | AM+K_not_in_group |
| Medtr7g095970_s | gamma-like protein (other strand read)         | AM+K_not_in_group |
| Medtr8g103240   | cyclin-dependent kinase                        | AM+K_not_in_group |
| Medtr3g107470   | /sugar transporter family protein              | AM+K_not_in_group |
| Medtr4g109340   | C2H2-type zinc finger protein                  | AM+K_not_in_group |
| Medtr8g090330   | fructan-1,6-bisphosphate phosphatase           | AM+K_not_in_group |
| Medtr1g080020   | divalent carboxylase-related kinase            | AM+K_not_in_group |
| Medtr2g044920   | 50S ribosomal protein L18                      | AM+K_not_in_group |
| Medtr8g014760   | LRR receptor-like kinase plant                 | AM+K_not_in_group |
| Medtr0176s0050  | hypothetical protein                           | AM+K_not_in_group |
| Medtr5g007860   | cellulose biosynthesis protein PRP39, putative | AM+K_not_in_group |
| Medtr5g032780   | glucanase-responsive NPH3 family protein       | AM+K_not_in_group |
| Medtr7g007850   | cationic amino acid transporter                | AM+K_not_in_group |
| Medtr5g075100   | CBL-interacting kinase                         | AM+K_not_in_group |
| Medtr6g470940   | /Threonine kinase family protein               | AM+K_not_in_group |

## diffusion\_prioritization\_ALL

|                                                   |                   |
|---------------------------------------------------|-------------------|
| Medtr3g462930 c metalloprotease FTSH protein      | AM+K_not_in_group |
| Medtr0072s0050 Jaf1 RNA-binding region protein    | AM+K_not_in_group |
| Medtr1g017880 transducin/WD-like repeat-protein   | AM+K_not_in_group |
| Medtr1g083130 x ATP-dependent RNA helicase        | AM+K_not_in_group |
| Medtr2g006020 transducin/WD40 repeat protein      | AM+K_not_in_group |
| Medtr2g099620 x ATP-dependent RNA helicase        | AM+K_not_in_group |
| Medtr3g115250 IA-processing TSR1-like protein     | AM+K_not_in_group |
| Medtr4g022890 erature viability protein, putative | AM+K_not_in_group |
| Medtr5g020190 RNA-associated protein, putative    | AM+K_not_in_group |
| Medtr7g044770 tion elongation factor EF protein   | AM+K_not_in_group |
| Medtr7g085820 importin beta-3, putative           | AM+K_not_in_group |
| Medtr4g132340 ar RNA-associated-like protein      | AM+K_not_in_group |
| Medtr4g067110 cyclin-like protein                 | AM+K_not_in_group |
| Medtr7g118330 elongated hypocotyl-like protein    | AM+K_not_in_group |
| Medtr2g046160 ubiquitin family protein            | AM+K_not_in_group |
| Medtr4g079720 hypothetical protein                | AM+K_not_in_group |
| Medtr4g087110 senescence-associated nodulin       | AM+K_not_in_group |
| Medtr5g071240 IH selenoprotein domain protein     | AM+K_not_in_group |
| Medtr5g085780 llo-phosphoesterase-like protein    | AM+K_not_in_group |
| Medtr8g041410 steine protease inhibitor cystatin  | AM+K_not_in_group |
| Medtr3g465690 HIT zinc finger protein             | AM+K_not_in_group |
| Medtr3g102120 receptor (SPRY) domain protein      | AM+K_not_in_group |
| Medtr5g022030 calcium-dependent kinase            | AM+K_not_in_group |
| Medtr6g016260 WNK kinase                          | AM+K_not_in_group |
| Medtr5g066050 urin-adaptor medium chain AP-2      | AM+K_not_in_group |
| Medtr8g028615 metal-associated domain protein     | AM+K_not_in_group |
| Medtr2g101770 30S ribosomal protein S17           | AM+K_not_in_group |
| Medtr5g093830 trigger factor-like protein         | AM+K_not_in_group |
| Medtr5g005380 Serine/Threonine-kinase TOR         | AM+K_not_in_group |
| Medtr1g028390 c metalloprotease FTSH protein      | AM+K_not_in_group |
| Medtr1g029620 IAD/NADH kinase family protein      | AM+K_not_in_group |
| Medtr1g092920 opeptidase-like protein, putative   | AM+K_not_in_group |
| Medtr1g114400 te hydrolase superfamily protein    | AM+K_not_in_group |
| Medtr2g008590 ein phosphatase domain protein      | AM+K_not_in_group |
| Medtr2g094160 out-2-enyl diphosphate synthase     | AM+K_not_in_group |
| Medtr2g436760 isoleucine-tRNA ligase              | AM+K_not_in_group |
| Medtr3g071440 JDP-glucose pyrophosphorylase       | AM+K_not_in_group |
| Medtr3g084450 -acid CoA ligase (AMP-forming)      | AM+K_not_in_group |
| Medtr3g091570 synthase 2/amyloplastic protein     | AM+K_not_in_group |
| Medtr3g115270 PR containing plant-like protein    | AM+K_not_in_group |
| Medtr4g054960 ng filament-like protein, putative  | AM+K_not_in_group |
| Medtr4g072990 PR containing plant-like protein    | AM+K_not_in_group |
| Medtr4g074370 ibrane single C2 domain protein     | AM+K_not_in_group |
| Medtr4g094232 porting ATPase PAA1, putative       | AM+K_not_in_group |
| Medtr4g122980 beta-glucosidase                    | AM+K_not_in_group |
| Medtr6g013660 chaperone protein ClpB3             | AM+K_not_in_group |
| Medtr6g016600 metalloprotease FTSH-like protein   | AM+K_not_in_group |
| Medtr6g088865 lasmic-like arginine-tRNA ligase    | AM+K_not_in_group |
| Medtr7g108940 RelA-SpoT-like protein RSH1         | AM+K_not_in_group |
| Medtr7g112140 ase-like hydrolase family protein   | AM+K_not_in_group |
| Medtr7g114660 plant/F20D21-34 protein             | AM+K_not_in_group |

## diffusion\_prioritization\_ALL

|               |                                             |                   |
|---------------|---------------------------------------------|-------------------|
| Medtr8g006955 | nthetase alpha chain/beta chain             | AM+K_not_in_group |
| Medtr8g031550 | potassium efflux antiporter                 | AM+K_not_in_group |
| Medtr8g094030 | nhibited division family A protein          | AM+K_not_in_group |
| Medtr8g097290 | nk transcription factor 8, putative         | AM+K_not_in_group |
| Medtr8g099525 | PPR superfamily protein                     | AM+K_not_in_group |
| Medtr8g463650 | te hydrolase superfamily protein            | AM+K_not_in_group |
| Medtr6g088835 | se regulatory subunit-like protein          | AM+K_not_in_group |
| Medtr7g112880 | 60S ribosomal protein L18-3                 | AM+K_not_in_group |
| Medtr4g078545 | ADP/ATP carrier protein                     | AM+K_not_in_group |
| Medtr3g052100 | s eted peptide (other strand read)          | AM+K_not_in_group |
| Medtr3g096230 | MAP kinase kinase kinase                    | AM+K_not_in_group |
| Medtr2g089290 | ocus lectin kinase family protein           | AM+K_not_in_group |
| Medtr1g022445 | dihydroflavonol 4-reductase                 | AM+K_not_in_group |
| Medtr1g072320 | bHLH transcription factor                   | AM+K_not_in_group |
| Medtr1g082440 | Na <sup>+</sup> /H <sup>+</sup> exchanger 1 | AM+K_not_in_group |
| Medtr1g100880 | ATP-binding protein, putative               | AM+K_not_in_group |
| Medtr3g102780 | steroid-binding domain protein              | AM+K_not_in_group |
| Medtr4g010250 | TPR repeat protein                          | AM+K_not_in_group |
| Medtr4g109470 | flavonoid hydroxylase                       | AM+K_not_in_group |
| Medtr5g079670 | myb transcription factor                    | AM+K_not_in_group |
| Medtr7g100510 | NRKY family transcription factor            | AM+K_not_in_group |
| Medtr7g104290 | UAA transporter family protein              | AM+K_not_in_group |
| Medtr6g088610 | receptor-like kinase                        | AM+K_not_in_group |
| Medtr1g030450 | tetrahydrofolate dehydrogenase              | AM+K_not_in_group |
| Medtr1g475140 | rase II subunit Rpb7-like protein           | AM+K_not_in_group |
| Medtr2g018260 | tic translation initiation factor 4E        | AM+K_not_in_group |
| Medtr3g034200 | transferase (NAT) family protein            | AM+K_not_in_group |
| Medtr3g088380 | replication factor C subunit 2              | AM+K_not_in_group |
| Medtr3g105810 | ariat debranching enzyme                    | AM+K_not_in_group |
| Medtr4g020460 | egradation-like protein, putative           | AM+K_not_in_group |
| Medtr4g037750 | ase II subunit RPB11-like protein           | AM+K_not_in_group |
| Medtr4g074920 | te hydrolase superfamily protein            | AM+K_not_in_group |
| Medtr5g079770 | A1 cistron-splicing factor AAR2             | AM+K_not_in_group |
| Medtr6g005840 | PWWP domain protein                         | AM+K_not_in_group |
| Medtr7g078760 | AX prenyl protease-like protein             | AM+K_not_in_group |
| Medtr8g098255 | DUF2365 family protein                      | AM+K_not_in_group |
| Medtr8g463930 | alactosyltransferase-like protein           | AM+K_not_in_group |
| Medtr2g102283 | oup 1 family glycosyltransferase            | AM+K_not_in_group |
| Medtr6g077750 | charyltransferase subunit STT3              | AM+K_not_in_group |
| Medtr8g080360 | syl-oligosaccharide glucosidase             | AM+K_not_in_group |
| Medtr8g070930 | Threonine kinase family protein             | AM+K_not_in_group |
| Medtr2g019990 | eonine-kinase PBS1-like protein             | AM+K_not_in_group |
| Medtr1g018205 | anion-selective channel protein             | AM+K_not_in_group |
| Medtr1g068965 | 40S ribosomal S9-like protein               | AM+K_not_in_group |
| Medtr1g090130 | cpn60 chaperonin family protein             | AM+K_not_in_group |
| Medtr1g110560 | nucleolar complex-like protein              | AM+K_not_in_group |
| Medtr2g049300 | ad kinase-interacting-like protein          | AM+K_not_in_group |
| Medtr3g009130 | DUF842 domain protein                       | AM+K_not_in_group |
| Medtr3g060690 | DNA-directed RNA polymerase                 | AM+K_not_in_group |
| Medtr3g108640 | arginine N-methyltransferase                | AM+K_not_in_group |
| Medtr5g028350 | IA-processing EBP2-like protein             | AM+K_not_in_group |

diffusion\_prioritization\_ALL

|               |                                                     |                   |
|---------------|-----------------------------------------------------|-------------------|
| Medtr5g068780 | 60S ribosomal protein L6                            | AM+K_not_in_group |
| Medtr5g072530 | small nuclear ribonucleoprotein                     | AM+K_not_in_group |
| Medtr6g005460 | nucleotide nucleotidyltransferase                   | AM+K_not_in_group |
| Medtr6g033410 | Noc2p family protein                                | AM+K_not_in_group |
| Medtr6g047580 | RNA polymerase II transcription subunit 36a         | AM+K_not_in_group |
| Medtr6g069420 | glutathione S-transferase                           | AM+K_not_in_group |
| Medtr7g020830 | DNA-directed RNA polymerase                         | AM+K_not_in_group |
| Medtr7g070240 | ribosomal complex-associated protein                | AM+K_not_in_group |
| Medtr7g088680 | ribosome-associated complex alpha chain             | AM+K_not_in_group |
| Medtr7g094460 | ribosome biogenesis factor Tu family protein        | AM+K_not_in_group |
| Medtr7g097110 | ribosome-binding Nop10p-like protein                | AM+K_not_in_group |
| Medtr5g074690 | ribosome membrane protein 110                       | AM+K_not_in_group |
| Medtr2g104440 | small nuclear ribonucleoprotein                     | AM+K_not_in_group |
| Medtr8g014050 | casein kinase I-like protein                        | AM+K_not_in_group |
| Medtr1g020080 | ribosome-binding protein RBP47C                     | AM+K_not_in_group |
| Medtr1g103100 | 40S ribosomal protein S3a-1                         | AM+K_not_in_group |
| Medtr2g007780 | ribosomal protein L10 family protein                | AM+K_not_in_group |
| Medtr3g007700 | 50S ribosomal protein L5P                           | AM+K_not_in_group |
| Medtr3g085410 | import receptor subunit TOM20                       | AM+K_not_in_group |
| Medtr3g112090 | ribosome biogenesis NIP7-like protein               | AM+K_not_in_group |
| Medtr4g078640 | ribosome rRNA methyltransferase Spb1                | AM+K_not_in_group |
| Medtr4g094398 | 60S ribosomal protein L3B                           | AM+K_not_in_group |
| Medtr4g096820 | ribosome-processing esf1-like protein               | AM+K_not_in_group |
| Medtr4g116430 | ribosome biogenesis factor EF-Tu-like protein       | AM+K_not_in_group |
| Medtr6g091770 | arginine N-methyltransferase                        | AM+K_not_in_group |
| Medtr7g053450 | 40S ribosomal S8-like protein                       | AM+K_not_in_group |
| Medtr7g057770 | 60S ribosomal protein L13a-4                        | AM+K_not_in_group |
| Medtr7g069390 | ribosome-associated 2G4-like protein                | AM+K_not_in_group |
| Medtr7g099170 | transducin/WD40 repeat protein                      | AM+K_not_in_group |
| Medtr8g076780 | 50S ribosomal protein L7/L12                        | AM+K_not_in_group |
| Medtr8g079690 | ribosomal protein idyl-prolyl cis-trans isomerase D | AM+K_not_in_group |
| Medtr8g102050 | plasmic asparagine-tRNA ligase                      | AM+K_not_in_group |
| Medtr5g042000 | ribosome-binding family protein, putative           | AM+K_not_in_group |
| Medtr7g091410 | ribosome-PR containing plant-like protein           | AM+K_not_in_group |
| Medtr1g025140 | hexokinase                                          | AM+K_not_in_group |
| Medtr4g019165 | pfkB family carbohydrate kinase                     | AM+K_not_in_group |
| Medtr5g084700 | nuclear ribonuclease Z                              | AM+K_not_in_group |
| Medtr8g063150 | hypothetical protein                                | AM+K_not_in_group |
| Medtr8g432340 | RAP domain protein                                  | AM+K_not_in_group |
| Medtr2g036810 | dose 1-epimerase family protein                     | AM+K_not_in_group |
| Medtr3g112280 | group 1 family glycosyltransferase                  | AM+K_not_in_group |
| Medtr1g010080 | DUF1997 family protein                              | AM+K_not_in_group |
| Medtr1g026550 | chlorophyll A/B-binding protein                     | AM+K_not_in_group |
| Medtr1g041890 | ribosome chain release factor, putative             | AM+K_not_in_group |
| Medtr1g042730 | reductase family oxidoreductase                     | AM+K_not_in_group |
| Medtr1g062190 | cytochrome P450 family monooxygenase                | AM+K_not_in_group |
| Medtr1g063350 | ribosome-lumenal 15.0 kDa protein                   | AM+K_not_in_group |
| Medtr1g088980 | DegP protease                                       | AM+K_not_in_group |
| Medtr1g096460 | 50S ribosomal protein L21                           | AM+K_not_in_group |
| Medtr1g097270 | ribosomal membrane protein, putative                | AM+K_not_in_group |
| Medtr1g114290 | thioredoxin-like protein                            | AM+K_not_in_group |

diffusion\_prioritization\_ALL

|               |                                     |                   |
|---------------|-------------------------------------|-------------------|
| Medtr2g007640 | plastid lipid-associated protein    | AM+K_not_in_group |
| Medtr2g019790 | Obg family GTPase CgtA              | AM+K_not_in_group |
| Medtr2g026635 | icopeptide (PPR) repeat protein     | AM+K_not_in_group |
| Medtr2g079060 | embryo defective 2737 protein       | AM+K_not_in_group |
| Medtr2g438010 | mTERF protein                       | AM+K_not_in_group |
| Medtr2g460600 | rotein translocase subunit SecY     | AM+K_not_in_group |
| Medtr3g011510 | zinc ion-binding protein, putative  | AM+K_not_in_group |
| Medtr3g027140 | l/RBD/RNP motif) family protein     | AM+K_not_in_group |
| Medtr3g058430 | 30S ribosomal protein S10           | AM+K_not_in_group |
| Medtr3g064070 | cygen-evolving enhancer protein     | AM+K_not_in_group |
| Medtr3g078320 | l-disulfide oxidoreductase DCC      | AM+K_not_in_group |
| Medtr3g083180 | l-threonine-tRNA ligase, putative   | AM+K_not_in_group |
| Medtr3g084950 | 15-cis-zeta-carotene isomerase      | AM+K_not_in_group |
| Medtr3g093570 | alpha/beta fold hydrolase           | AM+K_not_in_group |
| Medtr3g096750 | PsbP domain protein                 | AM+K_not_in_group |
| Medtr3g099470 | ynthetase/serine-tRNA ligase        | AM+K_not_in_group |
| Medtr3g108040 | PsbP domain protein                 | AM+K_not_in_group |
| Medtr3g118120 | x ATP-dependent RNA helicase        | AM+K_not_in_group |
| Medtr3g491820 | id transcriptionally active protein | AM+K_not_in_group |
| Medtr4g040350 | A-binding region domain protein     | AM+K_not_in_group |
| Medtr4g052010 | FAM210B-like protein                | AM+K_not_in_group |
| Medtr4g052500 | ransmembrane protein, putative      | AM+K_not_in_group |
| Medtr4g057210 | 50S ribosomal protein L9            | AM+K_not_in_group |
| Medtr4g057845 | hypothetical protein                | AM+K_not_in_group |
| Medtr4g083370 | n NusB domain protein, putative     | AM+K_not_in_group |
| Medtr4g086255 | rase SCO2-like protein, putative    | AM+K_not_in_group |
| Medtr4g130530 | translation initiation factor IF-3  | AM+K_not_in_group |
| Medtr5g006320 | S ferredoxin superfamily protein    | AM+K_not_in_group |
| Medtr5g020640 | dose 1-epimerase family protein     | AM+K_not_in_group |
| Medtr5g029550 | ive shikimate kinase-like protein   | AM+K_not_in_group |
| Medtr5g037050 | y of complex protein C, putative    | AM+K_not_in_group |
| Medtr5g041290 | 50S ribosomal L18-like protein      | AM+K_not_in_group |
| Medtr5g056200 | alpha/beta fold hydrolase           | AM+K_not_in_group |
| Medtr6g007180 | stasis regulator CHoR1, putative    | AM+K_not_in_group |
| Medtr6g029200 | oxide dismutase [Cu-Zn] protein     | AM+K_not_in_group |
| Medtr6g053090 | PPR containing plant protein        | AM+K_not_in_group |
| Medtr6g461650 | ATP-dependent Clp protease          | AM+K_not_in_group |
| Medtr7g029325 | ribosomal protein S21               | AM+K_not_in_group |
| Medtr7g045270 | hypothetical protein                | AM+K_not_in_group |
| Medtr7g051510 | oside hydrolase family 1 protein    | AM+K_not_in_group |
| Medtr7g062970 | one helix protein OHP               | AM+K_not_in_group |
| Medtr7g078800 | 50S ribosomal protein L5P           | AM+K_not_in_group |
| Medtr7g106440 | 33 kDa ribonucleoprotein            | AM+K_not_in_group |
| Medtr8g032340 | ecognition particle receptor FtsY   | AM+K_not_in_group |
| Medtr8g044240 | ophyll(ide) B reductase, putative   | AM+K_not_in_group |
| Medtr8g061130 | translation initiation factor IF-1  | AM+K_not_in_group |
| Medtr8g070680 | ransmembrane protein, putative      | AM+K_not_in_group |
| Medtr8g077125 | GTP-binding protein Era protein     | AM+K_not_in_group |
| Medtr8g093330 | uridylate kinase                    | AM+K_not_in_group |
| Medtr8g096110 | rring glycosyl group transferase    | AM+K_not_in_group |
| Medtr8g098615 | ubiquitin-conjugating enzyme        | AM+K_not_in_group |

diffusion\_prioritization\_ALL

|                                                     |                   |
|-----------------------------------------------------|-------------------|
| Medtr8g101390 ABC transporter ATPase protein        | AM+K_not_in_group |
| Medtr1g092990 PIF1-like helicase                    | AM+K_not_in_group |
| Medtr3g437680 c translation initiation factor 5A4   | AM+K_not_in_group |
| Medtr5g022250 transmembrane protein, putative       | AM+K_not_in_group |
| Medtr5g075370 protein interaction domain protein    | AM+K_not_in_group |
| Medtr7g079610_s etical protein (other strand read)  | AM+K_not_in_group |
| Medtr8g039090_s e-like protein (other strand read)  | AM+K_not_in_group |
| Medtr8g074780 PR containing plant-like protein      | AM+K_not_in_group |
| Medtr1g063370 rbrane magnesium transporter          | AM+K_not_in_group |
| Medtr1g099420 terminal protease family protein      | AM+K_not_in_group |
| Medtr2g069560 BTB/POZ domain protein                | AM+K_not_in_group |
| Medtr4g016980 AMP deaminase                         | AM+K_not_in_group |
| Medtr4g118020_s etical protein (other strand read)  | AM+K_not_in_group |
| Medtr8g074930 atase family, 2C domain protein       | AM+K_not_in_group |
| Medtr8g104410 CHY zinc finger protein               | AM+K_not_in_group |
| Medtr7g100905 DNA-binding protein S1FA              | AM+K_not_in_group |
| Medtr1g030770 main disease resistance protein       | AM+K_not_in_group |
| Medtr2g026715 lix hydrolase superfamily protein     | AM+K_not_in_group |
| Medtr3g037230 3HC4 type (RING finger) protein       | AM+K_not_in_group |
| Medtr4g125000 rone biosynthesis protein COQ9        | AM+K_not_in_group |
| Medtr7g009450 ceptor-like kinase family protein     | AM+K_not_in_group |
| Medtr3g081140 module stress tolerance protein       | AM+K_not_in_group |
| Medtr8g071050 ransmembrane protein, putative        | AM+K_not_in_group |
| Medtr4g097510 enoyl-(acyl carrier) reductase        | AM+K_not_in_group |
| Medtr8g087810 peptide/nitrate transporter           | AM+K_not_in_group |
| Medtr0036s0150_s r-like protein (other strand read) | AM+K_not_in_group |
| Medtr1g079925 ASCH domain protein                   | AM+K_not_in_group |
| Medtr1g103710_s LIKE protein (other strand read)    | AM+K_not_in_group |
| Medtr2g007800 eraction regulator family protein     | AM+K_not_in_group |
| Medtr2g008810 oplasmic tail-binding-like protein    | AM+K_not_in_group |
| Medtr2g010790_s ator, putative (other strand read)  | AM+K_not_in_group |
| Medtr3g064687 hypothetical protein                  | AM+K_not_in_group |
| Medtr3g067670 PR containing plant-like protein      | AM+K_not_in_group |
| Medtr3g073470_s yltransferase (other strand read)   | AM+K_not_in_group |
| Medtr3g087190_s l protein L23 (other strand read)   | AM+K_not_in_group |
| Medtr3g118535_s amily protein (other strand read)   | AM+K_not_in_group |
| Medtr4g092610_s main protein (other strand read)    | AM+K_not_in_group |
| Medtr4g118657 hypothetical protein                  | AM+K_not_in_group |
| Medtr5g010025_s J-like protein (other strand read)  | AM+K_not_in_group |
| Medtr5g010260_s ucleoprotein (other strand read)    | AM+K_not_in_group |
| Medtr6g009440_s a-like protein (other strand read)  | AM+K_not_in_group |
| Medtr6g036570_s etical protein (other strand read)  | AM+K_not_in_group |
| Medtr6g056080_s NA helicase (other strand read)     | AM+K_not_in_group |
| Medtr7g088700_s ription factor (other strand read)  | AM+K_not_in_group |
| Medtr7g113180_s amily protein (other strand read)   | AM+K_not_in_group |
| Medtr7g118300_s /ltransferase (other strand read)   | AM+K_not_in_group |
| Medtr8g039560_s tein, putative (other strand read)  | AM+K_not_in_group |
| Medtr8g040480 hypothetical protein                  | AM+K_not_in_group |
| Medtr8g076150 ase 16 kDa proteolipid subunit 4      | AM+K_not_in_group |
| Medtr8g077990 b transcription factor-like protein   | AM+K_not_in_group |
| Medtr8g106170_s main protein (other strand read)    | AM+K_not_in_group |

diffusion\_prioritization\_ALL

|               |                                      |                   |
|---------------|--------------------------------------|-------------------|
| Medtr1g116000 | ransmembrane protein, putative       | AM+K_not_in_group |
| Medtr1g008360 | PR containing plant-like protein     | AM+K_not_in_group |
| Medtr1g100890 | hypothetical protein                 | AM+K_not_in_group |
| Medtr2g021480 | F-box protein                        | AM+K_not_in_group |
| Medtr2g038090 | 4/1 protein short form protein       | AM+K_not_in_group |
| Medtr3g030055 | transferase (NAT) family protein     | AM+K_not_in_group |
| Medtr3g107590 | DUF247 domain protein                | AM+K_not_in_group |
| Medtr4g063560 | RNA recognition motif                | AM+K_not_in_group |
| Medtr4g098970 | hypothetical protein                 | AM+K_not_in_group |
| Medtr4g104210 | ribosomal protein S21                | AM+K_not_in_group |
| Medtr4g133515 | hypothetical protein                 | AM+K_not_in_group |
| Medtr5g087730 | ransmembrane protein, putative       | AM+K_not_in_group |
| Medtr5g090340 | reticulon-like protein B2            | AM+K_not_in_group |
| Medtr6g078160 | icopeptide (PPR) repeat protein      | AM+K_not_in_group |
| Medtr7g039510 | se-like hydrolase domain protein     | AM+K_not_in_group |
| Medtr7g077380 | hypothetical protein                 | AM+K_not_in_group |
| Medtr7g083080 | main TIGR01615 family protein        | AM+K_not_in_group |
| Medtr7g104640 | PR containing plant-like protein     | AM+K_not_in_group |
| Medtr3g110380 | asmic-like arginine-tRNA ligase      | AM+K_not_in_group |
| Medtr7g108150 | zinc finger constans-like protein    | AM+K_not_in_group |
| Medtr1g054300 | otein/notchless protein, putative    | AM+K_not_in_group |
| Medtr1g096270 | ceptor-like kinase family protein    | AM+K_not_in_group |
| Medtr6g015805 | feronia receptor-like kinase         | AM+K_not_in_group |
| Medtr1g072130 | PHD finger protein, putative         | AM+K_not_in_group |
| Medtr4g005050 | erase HAC-like protein, putative     | AM+K_not_in_group |
| Medtr4g078220 | callose synthase-like protein        | AM+K_not_in_group |
| Medtr4g094705 | -protein ligase UPL1-like protein    | AM+K_not_in_group |
| Medtr4g123070 | shydrogenase (other strand read)     | AM+K_not_in_group |
| Medtr5g087870 | ation initiation factor 2c, putative | AM+K_not_in_group |
| Medtr8g106220 | C2H2-type zinc finger protein        | AM+K_not_in_group |
| Medtr3g061040 | ransmembrane protein, putative       | AM+K_not_in_group |
| Medtr3g073100 | osphate 5-kinase family protein      | AM+K_not_in_group |
| Medtr1g071630 | hypothetical protein                 | AM+K_not_in_group |
| Medtr4g093040 | le lectin-domain receptor kinase     | AM+K_not_in_group |
| Medtr2g084815 | histone deacetylase 2a, putative     | AM+K_not_in_group |
| Medtr2g015790 | ribosomal protein L34                | AM+K_not_in_group |
| Medtr7g117665 | ve in meristem silencing protein     | AM+K_not_in_group |
| Medtr2g082990 | NDR1-like protein                    | AM+K_not_in_group |
| Medtr5g009310 | ckstrin-like (PH) domain protein     | AM+K_not_in_group |
| Medtr7g092650 | hypothetical protein                 | AM+K_not_in_group |
| Medtr7g109660 | ease factor subunit 1-1, putative    | AM+K_not_in_group |
| Medtr1g026290 | ein ubiquitin-like domain protein    | AM+K_not_in_group |
| Medtr1g072720 | ly-sosomal glucosylceramidase        | AM+K_not_in_group |
| Medtr2g093100 | /RBD/RNP motif) family protein       | AM+K_not_in_group |
| Medtr3g086300 | regulator RCC1 repeat protein        | AM+K_not_in_group |
| Medtr3g100110 | eranyl transferase alpha protein     | AM+K_not_in_group |
| Medtr4g011920 | arentsz eIF4AIII-binding protein     | AM+K_not_in_group |
| Medtr4g095270 | aspartyl protease family protein     | AM+K_not_in_group |
| Medtr5g089510 | lomerase activating protein Est1     | AM+K_not_in_group |
| Medtr6g091690 | ivity in the MVB pathway protein     | AM+K_not_in_group |
| Medtr5g074640 | tRNA pseudouridine synthase          | AM+K_not_in_group |

diffusion\_prioritization\_ALL

|                |                                            |                   |
|----------------|--------------------------------------------|-------------------|
| Medtr7g100890  | DNA-binding protein S1FA                   | AM+K_not_in_group |
| Medtr0018s0090 | ranscription factor group protein          | AM+K_not_in_group |
| Medtr4g105070  | lectin receptor kinase                     | AM+K_not_in_group |
| Medtr1g009650  | icopeptide (PPR) repeat protein            | AM+K_not_in_group |
| Medtr1g027970  | receptor-like kinase                       | AM+K_not_in_group |
| Medtr2g036560  | PR containing plant-like protein           | AM+K_not_in_group |
| Medtr2g069680  | PR containing plant-like protein           | AM+K_not_in_group |
| Medtr3g118360  | alanine-tRNA ligase                        | AM+K_not_in_group |
| Medtr4g083630  | PR containing plant-like protein           | AM+K_not_in_group |
| Medtr5g016070  | ribonuclease III domain protein            | AM+K_not_in_group |
| Medtr5g099290  | chloride channel family protein            | AM+K_not_in_group |
| Medtr6g027620  | A synthetase/valine-tRNA ligase            | AM+K_not_in_group |
| Medtr8g106680  | istid movement impaired protein            | AM+K_not_in_group |
| Medtr7g092700  | PRA1 family protein                        | AM+K_not_in_group |
| Medtr7g101170  | acuolar (H <sup>+</sup> )-ATPase G subunit | AM+K_not_in_group |
| Medtr3g464550  | PHD zinc finger protein                    | AM+K_not_in_group |
| Medtr2g038030  | DNA ligase                                 | AM+K_not_in_group |
| Medtr5g091380  | receptor-like kinase plant                 | AM+K_not_in_group |
| Medtr1g054710  | ε-rRNA processing protein Rrp5             | AM+K_not_in_group |
| Medtr1g070145  | kinesin light chain, putative              | AM+K_not_in_group |
| Medtr2g010790  | ranscriptional regulator, putative         | AM+K_not_in_group |
| Medtr2g054880  | ie N-methyltransferase, putative           | AM+K_not_in_group |
| Medtr3g013960  | ie N-methyltransferase, putative           | AM+K_not_in_group |
| Medtr4g074930  | RNA recognition motif                      | AM+K_not_in_group |
| Medtr4g104830  | PPR containing plant protein               | AM+K_not_in_group |
| Medtr7g062630  | TPR protein                                | AM+K_not_in_group |
| Medtr7g111750  | mal protein L21, related protein           | AM+K_not_in_group |
| Medtr8g017080  | cpn60 chaperonin family protein            | AM+K_not_in_group |
| Medtr8g094650  | PPR containing plant protein               | AM+K_not_in_group |
| Medtr5g010260  | JA processing ribonucleoprotein            | AM+K_not_in_group |
| Medtr2g090210  | plant/F9H3-4 protein                       | AM+K_not_in_group |
| Medtr5g031720  | RNA-binding KH domain protein              | AM+K_not_in_group |
| Medtr3g007750  | dimethyladenosine transferase              | AM+K_not_in_group |
| Medtr4g074160  | ere/microtubule-binding protein            | AM+K_not_in_group |
| Medtr3g101660  | NDER BLUE LIGHT-like protein               | AM+K_not_in_group |
| Medtr5g030900  | endoribonuclease E-like protein            | AM+K_not_in_group |
| Medtr3g107713  | binding nuclear Ran-like protein           | AM+K_not_in_group |
| Medtr4g073080  | n assembly factor group protein            | AM+K_not_in_group |
| Medtr5g018600  | TPR domain protein                         | AM+K_not_in_group |
| Medtr5g081980  | y particle non-ATPase subunit 8            | AM+K_not_in_group |
| Medtr6g023350  | me complex subunit-like protein            | AM+K_not_in_group |
| Medtr6g090520  | : 30S ribosomal protein, putative          | AM+K_not_in_group |
| Medtr1g086820  | PPR containing plant protein               | AM+K_not_in_group |
| Medtr7g104785  | ption regulation protein, putative         | AM+K_not_in_group |
| Medtr6g015190  | ceptor-like kinase family protein          | AM+K_not_in_group |
| Medtr4g105590  | Mpp10 protein                              | AM+K_not_in_group |
| Medtr4g032370  | PPR superfamily protein                    | AM+K_not_in_group |
| Medtr7g053470  | ptidyl-prolyl cis-trans isomerase          | AM+K_not_in_group |
| Medtr1g081910  | ransmembrane protein, putative             | AM+K_not_in_group |
| Medtr4g123860  | PR containing plant-like protein           | AM+K_not_in_group |
| Medtr4g068740  | ceptor-like kinase family protein          | AM+K_not_in_group |



diffusion\_prioritization\_ALL

|                                                   |                   |
|---------------------------------------------------|-------------------|
| Medtr4g074230 motif (RRM) superfamily protein     | AM+K_not_in_group |
| Medtr3g097320 rting-like kinase 2 family protein  | AM+K_not_in_group |
| Medtr1g043040 smic-like malate dehydrogenase      | AM+K_not_in_group |
| Medtr6g053280 uinone oxidoreductase, putative     | AM+K_not_in_group |
| Medtr8g101890 ynthase G subunit family protein    | AM+K_not_in_group |
| Medtr7g099210 ansducin/WD-like repeat-protein     | AM+K_not_in_group |
| Medtr1g013440 ribosomal protein L53/MRP-L53       | AM+K_not_in_group |
| Medtr1g092900 ucleic acid-binding protein R3H     | AM+K_not_in_group |
| Medtr1g098740 ransmembrane protein, putative      | AM+K_not_in_group |
| Medtr4g094260 polyadenylate-binding protein II    | AM+K_not_in_group |
| Medtr4g114930 ily protein/WD-40 repeat protein    | AM+K_not_in_group |
| Medtr4g117990 transcription factor                | AM+K_not_in_group |
| Medtr5g009810 GDT1-like protein                   | AM+K_not_in_group |
| Medtr5g022790 ATP synthase, A subunit             | AM+K_not_in_group |
| Medtr5g080545 hypothetical protein                | AM+K_not_in_group |
| Medtr5g089490 Rho-like GTPase family protein      | AM+K_not_in_group |
| Medtr7g113730 cation calcium exchanger            | AM+K_not_in_group |
| Medtr8g030733 hypothetical protein                | AM+K_not_in_group |
| Medtr4g094248 hphoprotein-like protein, putative  | AM+K_not_in_group |
| Medtr5g083160 aminyl asparaginase amidase A       | AM+K_not_in_group |
| Medtr7g077830 phosphate transporter               | AM+K_not_in_group |
| Medtr4g072060 tol-6-phosphate dehydrogenase       | AM+K_not_in_group |
| Medtr5g033300 :-phosphate pyrophosphokinase       | AM+K_not_in_group |
| Medtr7g089190 DNA/RNA helicase                    | AM+K_not_in_group |
| Medtr5g099170 um-binding EF hand-like protein     | AM+K_not_in_group |
| Medtr1g008280 al peptide peptidase-like protein   | AM+K_not_in_group |
| Medtr1g029550 hypothetical protein                | AM+K_not_in_group |
| Medtr2g089815 ound-responsive family protein      | AM+K_not_in_group |
| Medtr5g032030 hypothetical protein                | AM+K_not_in_group |
| Medtr8g012595 :in retaining receptor-like protein | AM+K_not_in_group |
| Medtr8g080380 signal peptidase 12 kDa protein     | AM+K_not_in_group |
| Medtr8g087720 protein (MIP) family transporter    | AM+K_not_in_group |
| Medtr2g055250 F-box protein                       | AM+K_not_in_group |
| Medtr1g022045 plant/F18O14-17 protein             | AM+K_not_in_group |
| Medtr1g090620 :yst subunit exo70 family protein   | AM+K_not_in_group |
| Medtr1g116957 importin-like protein               | AM+K_not_in_group |
| Medtr6g012630 RNA-binding KH domain protein       | AM+K_not_in_group |
| Medtr7g096020 guanylate-binding family protein    | AM+K_not_in_group |
| Medtr8g072600 e/threonine-protein phosphatase     | AM+K_not_in_group |
| Medtr3g077540 histidine kinase-, DNA gyrase B     | AM+K_not_in_group |
| Medtr4g093070 e lectin-domain receptor kinase     | AM+K_not_in_group |
| Medtr8g027790 nucleotidyltransferase              | AM+K_not_in_group |
| Medtr1g087020 rotochrome C oxidase subunit 5C     | AM+K_not_in_group |
| Medtr4g060540 roteasome subunit beta protein      | AM+K_not_in_group |
| Medtr7g104905 s:ein, putative (other strand read) | AM+K_not_in_group |
| Medtr1g070840 e-stranded DNA-binding protein      | AM+K_not_in_group |
| Medtr1g107450 TIC21-like protein                  | AM+K_not_in_group |
| Medtr2g014430 ransmembrane protein, putative      | AM+K_not_in_group |
| Medtr2g460740 ytosol aminopeptidase), putative    | AM+K_not_in_group |
| Medtr3g079390 DUF247 domain protein               | AM+K_not_in_group |
| Medtr3g111850 G42765) TAIR;Acc:AT5G42765          | AM+K_not_in_group |

## diffusion\_prioritization\_ALL

|                |                                      |                   |
|----------------|--------------------------------------|-------------------|
| Medtr3g114540  | seudouridine synthase, putative      | AM+K_not_in_group |
| Medtr7g073250  | ngation factor P (EF-P), putative    | AM+K_not_in_group |
| Medtr7g113450  | RNA pseudouridine synthase           | AM+K_not_in_group |
| Medtr7g113780  | 'SUR4 membrane family protein        | AM+K_not_in_group |
| Medtr8g030600  | anion transporter 4                  | AM+K_not_in_group |
| Medtr3g085550  | genesis GTPase RsgA, putative        | AM+K_not_in_group |
| Medtr6g477860  | myb transcription factor             | AM+K_not_in_group |
| Medtr3g070180  | y particle non-ATPase subunit 8      | AM+K_not_in_group |
| Medtr8g019520  | alfin-like transcription factor      | AM+K_not_in_group |
| Medtr0018s0320 | ystine transporter family protein    | AM+K_not_in_group |
| Medtr0019s0010 | s etical protein (other strand read) | AM+K_not_in_group |
| Medtr1g019930  | ie regulatory subunit-like protein   | AM+K_not_in_group |
| Medtr1g033830  | iovirus multiplication-like protein  | AM+K_not_in_group |
| Medtr1g050510  | hypothetical protein                 | AM+K_not_in_group |
| Medtr1g063000  | ransmembrane protein, putative       | AM+K_not_in_group |
| Medtr1g069215  | ur cluster scaffold protein NFU4     | AM+K_not_in_group |
| Medtr1g070390  | istone H1 and h5 family protein      | AM+K_not_in_group |
| Medtr1g079410  | phloem protein 2-B13                 | AM+K_not_in_group |
| Medtr1g095620  | actor for assembly of V-ATPase       | AM+K_not_in_group |
| Medtr1g108820  | ox/RNI/FBD-like domain protein       | AM+K_not_in_group |
| Medtr1g109190  | s etical protein (other strand read) | AM+K_not_in_group |
| Medtr2g021530  | hypothetical protein                 | AM+K_not_in_group |
| Medtr2g087120  | PR containing plant-like protein     | AM+K_not_in_group |
| Medtr2g091135  | ription factor GTE4-like protein     | AM+K_not_in_group |
| Medtr3g006810  | ino-terminal domain-like protein     | AM+K_not_in_group |
| Medtr3g085430  | ear transcription factor Y protein   | AM+K_not_in_group |
| Medtr3g092020  | F-box-like protein                   | AM+K_not_in_group |
| Medtr3g110740  | F-box/LRR protein                    | AM+K_not_in_group |
| Medtr4g021520  | ase:anthocyanin acyltransferase      | AM+K_not_in_group |
| Medtr4g027050  | VAMP-associated protein              | AM+K_not_in_group |
| Medtr4g031235  | igoidine synthase A-like protein     | AM+K_not_in_group |
| Medtr4g034860  | rotein interaction domain protein    | AM+K_not_in_group |
| Medtr4g073490  | hypothetical protein                 | AM+K_not_in_group |
| Medtr4g085760  | arboxy-terminal domain protein       | AM+K_not_in_group |
| Medtr4g099190  | plant/K14A3-4 protein                | AM+K_not_in_group |
| Medtr5g017640  | nponent specific domain protein      | AM+K_not_in_group |
| Medtr5g018070  | -LRR disease resistance protein      | AM+K_not_in_group |
| Medtr5g069340  | dillo/beta-catenin repeat protein    | AM+K_not_in_group |
| Medtr5g070088  | rotein interaction domain protein    | AM+K_not_in_group |
| Medtr5g078090  | osylation factor-like protein A1D    | AM+K_not_in_group |
| Medtr6g005320  | x ATP-dependent RNA helicase         | AM+K_not_in_group |
| Medtr6g013720  | 3HC4 type (RING finger) protein      | AM+K_not_in_group |
| Medtr6g046960  | transferase superfamily protein      | AM+K_not_in_group |
| Medtr6g053230  | ransmembrane protein, putative       | AM+K_not_in_group |
| Medtr7g011345  | receptor kinase S.4-like protein     | AM+K_not_in_group |
| Medtr7g013590  | rotein interaction domain protein    | AM+K_not_in_group |
| Medtr7g034355  | ninal glutamine amidohydrolase       | AM+K_not_in_group |
| Medtr7g062560  | xygenase family oxidoreductase       | AM+K_not_in_group |
| Medtr7g085800  | tubulin beta-1 chain                 | AM+K_not_in_group |
| Medtr8g039860  | s etical protein (other strand read) | AM+K_not_in_group |
| Medtr8g039930  | se protein (TIR-NBS-LRR class)       | AM+K_not_in_group |

diffusion\_prioritization\_ALL

|               |                                     |                   |
|---------------|-------------------------------------|-------------------|
| Medtr8g094000 | hypothetical protein                | AM+K_not_in_group |
| Medtr8g105550 | papain family cysteine protease     | AM+K_not_in_group |
| Medtr4g088320 | LRR receptor-like kinase            | AM+K_not_in_group |
| Medtr1g022145 | GYF domain protein                  | AM+K_not_in_group |
| Medtr1g105605 | in transporter Sec23-like protein   | AM+K_not_in_group |
| Medtr1g109170 | RNA helicase DHX36-like protein     | AM+K_not_in_group |
| Medtr2g007010 | cell division control-like protein  | AM+K_not_in_group |
| Medtr2g010110 | lymerase V-like protein, putative   | AM+K_not_in_group |
| Medtr2g015320 | pendent RNA helicase DHX35          | AM+K_not_in_group |
| Medtr2g020420 | amino-terminal domain protein       | AM+K_not_in_group |
| Medtr2g064740 | nucleoprotein 200 kDa helicase      | AM+K_not_in_group |
| Medtr2g097290 | olomere-binding protein, putative   | AM+K_not_in_group |
| Medtr2g103370 | interacting component, putative     | AM+K_not_in_group |
| Medtr3g005240 | subunit of tffiic protein, putative | AM+K_not_in_group |
| Medtr3g089075 | corepressor SEUSS-like protein      | AM+K_not_in_group |
| Medtr3g106160 | chaperone ClpB, putative            | AM+K_not_in_group |
| Medtr3g107910 | il corepressor leunig-like protein  | AM+K_not_in_group |
| Medtr3g108010 | n elongation factor S-II, putative  | AM+K_not_in_group |
| Medtr3g109922 | beta-adaptin A-like protein         | AM+K_not_in_group |
| Medtr4g028130 | ranscription factor family protein  | AM+K_not_in_group |
| Medtr4g068120 | ing time control FPA-like protein   | AM+K_not_in_group |
| Medtr4g077910 | cellulose synthase-like protein     | AM+K_not_in_group |
| Medtr4g115450 | erases 35, NatC auxiliary subunit   | AM+K_not_in_group |
| Medtr5g008420 | RNA-binding KH domain protein       | AM+K_not_in_group |
| Medtr5g069290 | MLP3.11 protein                     | AM+K_not_in_group |
| Medtr5g090120 | ndent RNA helicase-like protein     | AM+K_not_in_group |
| Medtr6g005550 | ndent RNA helicase-like protein     | AM+K_not_in_group |
| Medtr7g108390 | minidependens protein, putative     | AM+K_not_in_group |
| Medtr8g014560 | poly(A) polymerase                  | AM+K_not_in_group |
| Medtr8g015580 | WWP/MBT superfamily protein         | AM+K_not_in_group |
| Medtr8g021980 | DNA-binding protein, putative       | AM+K_not_in_group |
| Medtr8g023445 | DNA-directed RNA polymerase         | AM+K_not_in_group |
| Medtr8g073170 | ie complex exonuclease RRP44        | AM+K_not_in_group |
| Medtr8g089380 | amaged DNA-binding protein 1A       | AM+K_not_in_group |
| Medtr8g097000 | lent RNA helicase family protein    | AM+K_not_in_group |
| Medtr8g099105 | transcription factor, putative      | AM+K_not_in_group |
| Medtr8g099785 | mportin subunit beta-like protein   | AM+K_not_in_group |
| Medtr8g104280 | transferase MT-A70-like protein     | AM+K_not_in_group |
| Medtr8g463890 | l/RBD/RNP motif) family protein     | AM+K_not_in_group |
| Medtr2g013540 | cpn60 chaperonin family protein     | AM+K_not_in_group |
| Medtr1g105110 | E2F transcription factor            | AM+K_not_in_group |
| Medtr2g100710 | 6-phosphofructokinase               | AM+K_not_in_group |
| Medtr4g072980 | auxin-responsive family protein     | AM+K_not_in_group |
| Medtr4g082550 | ransmembrane protein, putative      | AM+K_not_in_group |
| Medtr8g469230 | receptor-like kinase plant          | AM+K_not_in_group |
| Medtr4g108360 | BHLH transcription factor           | AM+K_not_in_group |
| Medtr2g078020 | at thioredoxin TTL1-like protein    | AM+K_not_in_group |
| Medtr4g069920 | mer subunit gamma-like protein      | AM+K_not_in_group |
| Medtr4g070140 | l/RBD/RNP motif) family protein     | AM+K_not_in_group |
| Medtr4g122920 | -acetyltransferase family protein   | AM+K_not_in_group |
| Medtr5g077610 | nyl-tRNA synthetase beta chain      | AM+K_not_in_group |

## diffusion\_prioritization\_ALL

|                |                                                 |                   |
|----------------|-------------------------------------------------|-------------------|
| Medtr7g118220  | component of oligomeric protein                 | AM+K_not_in_group |
| Medtr3g107530  | homeobox domain protein                         | AM+K_not_in_group |
| Medtr2g097900  | num-activated citrate transporter               | AM+K_not_in_group |
| Medtr0199s0040 | 60S ribosomal protein L37a-2                    | AM+K_not_in_group |
| Medtr3g009910  | hypothetical protein                            | AM+K_not_in_group |
| Medtr4g008070  | transcription factor family protein             | AM+K_not_in_group |
| Medtr4g019610  | elongation factor 1-beta                        | AM+K_not_in_group |
| Medtr4g080787  | cox/RNI/FBD-like domain protein                 | AM+K_not_in_group |
| Medtr4g133410  | PPR containing protein, putative                | AM+K_not_in_group |
| Medtr5g042980  | amino acid kinase family protein                | AM+K_not_in_group |
| Medtr7g091060  | transmembrane protein, putative                 | AM+K_not_in_group |
| Medtr2g036490  | receptor-like kinase                            | AM+K_not_in_group |
| Medtr1g083810  | importin subunit alpha-1b                       | AM+K_not_in_group |
| Medtr2g019020  | non ABC transporter family protein              | AM+K_not_in_group |
| Medtr4g081050  | complex subunit zeta-like protein               | AM+K_not_in_group |
| Medtr0045s0110 | DUF642 family protein                           | AM+K_not_in_group |
| Medtr1g069460  | transferase KATAMARI-like protein               | AM+K_not_in_group |
| Medtr1g096320  | transmembrane protein                           | AM+K_not_in_group |
| Medtr2g088080  | L-ascorbate oxidase-like protein                | AM+K_not_in_group |
| Medtr2g100110  | beta-galactosidase                              | AM+K_not_in_group |
| Medtr4g019110  | tubulin beta-1 chain                            | AM+K_not_in_group |
| Medtr4g078230  | oxido reductase family 5 protein                | AM+K_not_in_group |
| Medtr4g119880  | xyloglucan xylosyltransferase                   | AM+K_not_in_group |
| Medtr4g127480  | subtilisin-like serine protease                 | AM+K_not_in_group |
| Medtr7g075840  | family GT8 glycosyltransferase                  | AM+K_not_in_group |
| Medtr7g085090  | acid phosphatase family protein                 | AM+K_not_in_group |
| Medtr3g104500  | ADP/ATP carrier protein                         | AM+K_not_in_group |
| Medtr5g020000  | complex ATPase chain, putative                  | AM+K_not_in_group |
| Medtr8g079465  | zinc ion-binding protein                        | AM+K_not_in_group |
| Medtr2g006040  | oxyltransferase catalytic subunit               | AM+K_not_in_group |
| Medtr3g087360  | transmembrane protein, putative                 | AM+K_not_in_group |
| Medtr3g082700  | sequence transporter (other strand read)        | AM+K_not_in_group |
| Medtr1g041795  | protein (rotKB/Swiss-Prot;Acc:B7FKW7]           | AM+K_not_in_group |
| Medtr8g086080  | carrier protein                                 | AM+K_not_in_group |
| Medtr1g086430  | hypothetical protein                            | AM+K_not_in_group |
| Medtr2g438740  | ankyrin repeat plant-like protein               | AM+K_not_in_group |
| Medtr3g092890  | xygenase family oxidoreductase                  | AM+K_not_in_group |
| Medtr6g023340  | chitinase                                       | AM+K_not_in_group |
| Medtr2g036890  | ribosomal RNA-associated-like protein           | AM+K_not_in_group |
| Medtr7g111610  | Serine/Threonine-kinase haspin                  | AM+K_not_in_group |
| Medtr8g039870  | protein (TIR-NBS-LRR class)                     | AM+K_not_in_group |
| Medtr8g099095  | lin-domain kinase CDPK protein                  | AM+K_not_in_group |
| Medtr3g075210  | phosphatase REF6-like protein, putative         | AM+K_not_in_group |
| Medtr7g080575  | protein involved in sister chromatid cohesion 1 | AM+K_not_in_group |
| Medtr4g094708  | protein ligase UPL1-like protein                | AM+K_not_in_group |
| Medtr2g011335  | sequence transporter (other strand read)        | AM+K_not_in_group |
| Medtr3g099380  | general regulatory factor 2                     | AM+K_not_in_group |
| Medtr4g102750  | transferase family MBOAT protein                | AM+K_not_in_group |
| Medtr4g120360  | TPR repeat protein                              | AM+K_not_in_group |
| Medtr5g054950  | auxin efflux carrier family protein             | AM+K_not_in_group |
| Medtr2g078670  | zinc-binding protein, putative                  | AM+K_not_in_group |

## diffusion\_prioritization\_ALL

|                |                                     |                   |
|----------------|-------------------------------------|-------------------|
| Medtr5g016830  | filament-like plant protein         | AM+K_not_in_group |
| Medtr3g072990  | Threonine kinase family protein     | AM+K_not_in_group |
| Medtr4g012000  | λ-specific adenosine deaminase      | AM+K_not_in_group |
| Medtr1g087740  | hypothetical protein                | AM+K_not_in_group |
| Medtr2g037420  | ongation factor Tu family protein   | AM+K_not_in_group |
| Medtr4g081850  | cleolar GTP-binding-like protein    | AM+K_not_in_group |
| Medtr4g088495  | polyubiquitin 3                     | AM+K_not_in_group |
| Medtr4g113480  | phosphatase 2C family protein       | AM+K_not_in_group |
| Medtr7g016970  | transducin/WD40 repeat protein      | AM+K_not_in_group |
| Medtr0316s0010 | 50S ribosomal protein L6            | AM+K_not_in_group |
| Medtr1g034050  | defective 1273 protein, putative    | AM+K_not_in_group |
| Medtr1g060010  | cell division FtsZ-like protein     | AM+K_not_in_group |
| Medtr1g094160  | DUF3783 domain protein              | AM+K_not_in_group |
| Medtr1g115505  | cobalamin biosynthesis protein      | AM+K_not_in_group |
| Medtr2g021220  | membrane transporters protein       | AM+K_not_in_group |
| Medtr2g034580  | ihydrolipoamide dehydrogenase       | AM+K_not_in_group |
| Medtr2g060420  | ide synthase-associated protein     | AM+K_not_in_group |
| Medtr2g099910  | uccinic semialdehyde reductase      | AM+K_not_in_group |
| Medtr2g460760  | l aminopeptidase family protein     | AM+K_not_in_group |
| Medtr3g023160  | rophyll fluorescence 153 protein    | AM+K_not_in_group |
| Medtr3g063200  | ε-rich glycoprotein family protein  | AM+K_not_in_group |
| Medtr3g074490  | substrate carrier family protein    | AM+K_not_in_group |
| Medtr3g077490  | embryo defective 2759 protein       | AM+K_not_in_group |
| Medtr3g078860  | superoxide dismutase                | AM+K_not_in_group |
| Medtr3g094190  | anosine tRNA methyltransferase      | AM+K_not_in_group |
| Medtr3g109620  | regulatory plant protein, putative  | AM+K_not_in_group |
| Medtr3g110640  | 50S ribosomal protein               | AM+K_not_in_group |
| Medtr3g466250  | tyrosyl-tRNA synthetase             | AM+K_not_in_group |
| Medtr4g015540  | 338140) TAIR;Acc:AT2G38140]         | AM+K_not_in_group |
| Medtr4g060990  | atase-like protein PTPLB protein    | AM+K_not_in_group |
| Medtr4g102000  | . Clp protease proteolytic protein  | AM+K_not_in_group |
| Medtr4g130680  | osyltransferase catalytic subunit   | AM+K_not_in_group |
| Medtr4g134910  | se and-related enzyme, putative     | AM+K_not_in_group |
| Medtr5g026840  | . Clp protease proteolytic protein  | AM+K_not_in_group |
| Medtr5g035590  | uclease inhibitor domain protein    | AM+K_not_in_group |
| Medtr6g003980  | ethionyl-tRNA formyltransferase     | AM+K_not_in_group |
| Medtr7g012240  | ltransferase SpoU family protein    | AM+K_not_in_group |
| Medtr7g029350  | ansferase small domain protein      | AM+K_not_in_group |
| Medtr7g035310  | peptide deformylase 1A              | AM+K_not_in_group |
| Medtr7g083030  | phenylalanyl-tRNA synthetase        | AM+K_not_in_group |
| Medtr7g087110  | O-acetylserine (thiol) lyase        | AM+K_not_in_group |
| Medtr7g087250  | )-chaperone GrpE family protein     | AM+K_not_in_group |
| Medtr7g094890  | ribosome biogenesis GTPase A        | AM+K_not_in_group |
| Medtr8g009280  | GroES chaperonin                    | AM+K_not_in_group |
| Medtr8g009290  | it defective 320 protein, putative  | AM+K_not_in_group |
| Medtr8g013670  | aining plant-like protein, putative | AM+K_not_in_group |
| Medtr8g044030  | eine carboxyl methyltransferase     | AM+K_not_in_group |
| Medtr4g124430  | otide-exchange protein, putative    | AM+K_not_in_group |
| Medtr0703s0020 | hypothetical protein                | AM+K_not_in_group |
| Medtr1g032430  | -acetylglucosamine deacetylase      | AM+K_not_in_group |
| Medtr2g012650  | olar RNA-associated-like protein    | AM+K_not_in_group |

## diffusion\_prioritization\_ALL

|                                                   |                   |
|---------------------------------------------------|-------------------|
| Medtr8g062440 innamyl alcohol dehydrogenase       | AM+K_not_in_group |
| Medtr1g094010 osphoenolpyruvate carboxylase       | AM+K_not_in_group |
| Medtr5g091340 osphate synthase family protein     | AM+K_not_in_group |
| Medtr6g080430 istid movement impaired protein     | AM+K_not_in_group |
| Medtr8g092890 ansducin/WD-like repeat-protein     | AM+K_not_in_group |
| Medtr6g013690 n conjugation factor E4, putative   | AM+K_not_in_group |
| Medtr4g117610 oxidase, enzyme domain protein      | AM+K_not_in_group |
| Medtr5g017020 ferase of the CBP family protein    | AM+K_not_in_group |
| Medtr4g007820 ended RNA-binding motif protein     | AM+K_not_in_group |
| Medtr1g076400 ubiquitin ligase PUB14, putative    | AM+K_not_in_group |
| Medtr7g117310 le-gated ion channel-like protein   | AM+K_not_in_group |
| Medtr8g095330 rting-like kinase 2 family protein  | AM+K_not_in_group |
| Medtr8g014080 ansducin/WD-like repeat-protein     | AM+K_not_in_group |
| Medtr2g103950 Pti1-like kinase                    | AM+K_not_in_group |
| Medtr3g006370 ) impaired response-like protein    | AM+K_not_in_group |
| Medtr2g006750 importin beta-4                     | AM+K_not_in_group |
| Medtr2g084735 DNA repair helicase (rad3)          | AM+K_not_in_group |
| Medtr2g102150 : elongation helicase-like protein  | AM+K_not_in_group |
| Medtr3g089910 actor SPT5-like protein, putative   | AM+K_not_in_group |
| Medtr3g106210 -remodeling factor pickle protein   | AM+K_not_in_group |
| Medtr4g011890 ninal acetyltransferase, putative   | AM+K_not_in_group |
| Medtr4g099300 ltransferase SpoU family protein    | AM+K_not_in_group |
| Medtr7g106380 protein particle complex protein    | AM+K_not_in_group |
| Medtr5g036250 hypothetical protein                | AM+K_not_in_group |
| Medtr5g068100 methylesterase-like protein         | AM+K_not_in_group |
| Medtr3g064420 long-chain acyl-CoA synthetase      | AM+K_not_in_group |
| Medtr6g016990 :sociated family protein, putative  | AM+K_not_in_group |
| Medtr2g101460 R1 DNA-binding domain protein       | AM+K_not_in_group |
| Medtr0056s0160 nthase/flavanone 3-hydroxylase     | AM+K_not_in_group |
| Medtr2g055710 -rich group669 secreted peptide     | AM+K_not_in_group |
| Medtr2g027550 ransmembrane protein, putative      | AM+K_not_in_group |
| Medtr3g051570 DUF4228 domain protein              | AM+K_not_in_group |
| Medtr4g033295 transcription factor                | AM+K_not_in_group |
| Medtr5g046110 acid carboxyl methyltransferase     | AM+K_not_in_group |
| Medtr2g012830 helicase and zinc finger protein    | AM+K_not_in_group |
| Medtr1g050670 ntiation-related factor 1, putative | AM+K_not_in_group |
| Medtr3g078030 hypothetical protein                | AM+K_not_in_group |
| Medtr4g084150 ed RNA polymerase II subunit 3      | AM+K_not_in_group |
| Medtr4g096880 n assembly factor group protein     | AM+K_not_in_group |
| Medtr4g130940 itin carboxyl-terminal hydrolase    | AM+K_not_in_group |
| Medtr5g044050 cobalamin biosynthesis protein      | AM+K_not_in_group |
| Medtr5g089300 RNA branch site p14-like protein    | AM+K_not_in_group |
| Medtr6g056080 x ATP-dependent RNA helicase        | AM+K_not_in_group |
| Medtr6g086635 ivity in the MVB pathway protein    | AM+K_not_in_group |
| Medtr7g088990 ucleic acid-binding protein R3H     | AM+K_not_in_group |
| Medtr7g105260 /RBD/RNP motif) family protein      | AM+K_not_in_group |
| Medtr7g112403 dehydration-induced-like protein    | AM+K_not_in_group |
| Medtr7g117545 mily RNA-binding repeatprotein      | AM+K_not_in_group |
| Medtr8g080700 lutamate-rich WD repeat protein     | AM+K_not_in_group |
| Medtr8g088390 ' carboxy-terminal region protein   | AM+K_not_in_group |
| Medtr8g088670 m transporter MRS2-like protein     | AM+K_not_in_group |

diffusion\_prioritization\_ALL

|                |                                        |                   |
|----------------|----------------------------------------|-------------------|
| Medtr0276s0050 | annexin D8                             | AM+K_not_in_group |
| Medtr2g025780  | hypothetical protein                   | AM+K_not_in_group |
| Medtr4g113530  | fyng potassium channel subunit         | AM+K_not_in_group |
| Medtr8g020400  | animal MPPE1-like protein              | AM+K_not_in_group |
| Medtr2g078120  | tRNA dimethylallyltransferase          | AM+K_not_in_group |
| Medtr1g492660  | hypothetical protein                   | AM+K_not_in_group |
| Medtr3g014200  | DUF3128 family protein                 | AM+K_not_in_group |
| Medtr4g078505  | prefoldin protein                      | AM+K_not_in_group |
| Medtr4g094860  | cysteine protease family protein       | AM+K_not_in_group |
| Medtr6g092430  | F-box/RNI superfamily protein          | AM+K_not_in_group |
| Medtr7g114200  | hypothetical protein                   | AM+K_not_in_group |
| Medtr6g033235  | hypothetical protein                   | AM+K_not_in_group |
| Medtr5g013340  | apoptosis-promoting Bax1 protein       | AM+K_not_in_group |
| Medtr2g100825  | ubiquitin ligase, SKP1 component       | AM+K_not_in_group |
| Medtr6g012850  | icopeptide (PPR) repeat protein        | AM+K_not_in_group |
| Medtr5g067730  | Japanese-related sulfurtransferase     | AM+K_not_in_group |
| Medtr3g450200  | mbirin family Qb-SNARE protein         | AM+K_not_in_group |
| Medtr4g134560  | protein interaction domain protein     | AM+K_not_in_group |
| Medtr5g037880  | capsid protein interacting protein     | AM+K_not_in_group |
| Medtr7g100410  | 50S ribosomal protein L22              | AM+K_not_in_group |
| Medtr4g095400  | casein kinase                          | AM+K_not_in_group |
| Medtr0001s0430 | icopeptide (PPR) repeat protein        | AM+K_not_in_group |
| Medtr1g007490  | hypothetical protein                   | AM+K_not_in_group |
| Medtr1g064230  | (RBD/RNP motif) family protein         | AM+K_not_in_group |
| Medtr1g086000  | transcriptionally active protein       | AM+K_not_in_group |
| Medtr1g086940  | Clp protease proteolytic protein       | AM+K_not_in_group |
| Medtr2g018740  | transcriptionally active protein       | AM+K_not_in_group |
| Medtr2g063080  | ATP-dependent RNA helicase             | AM+K_not_in_group |
| Medtr2g100220  | ribonuclease III domain protein        | AM+K_not_in_group |
| Medtr2g100500  | (methyl-5)-methyltransferase Ruma      | AM+K_not_in_group |
| Medtr3g005360  | deoxyribonucleoside kinase             | AM+K_not_in_group |
| Medtr3g075050  | acid-binding, OB-fold-like protein     | AM+K_not_in_group |
| Medtr4g005520  | YGGT family protein                    | AM+K_not_in_group |
| Medtr4g064780  | outer membrane of protein 75-III       | AM+K_not_in_group |
| Medtr4g069080  | cytochrome C biogenesis protein Ccs1   | AM+K_not_in_group |
| Medtr4g088800  | esterase hydrolase superfamily protein | AM+K_not_in_group |
| Medtr5g005200  | SWIB/MDM2 domain protein               | AM+K_not_in_group |
| Medtr5g008300  | PPR containing plant-like protein      | AM+K_not_in_group |
| Medtr5g068860  | termination factor family protein      | AM+K_not_in_group |
| Medtr5g079860  | NA m2A2503 methyltransferase           | AM+K_not_in_group |
| Medtr6g039840  | ATP-dependent RNA helicase             | AM+K_not_in_group |
| Medtr7g076280  | small subunit methyltransferase A      | AM+K_not_in_group |
| Medtr8g094200  | DUF3727 family protein                 | AM+K_not_in_group |
| Medtr4g074080  | receptor-like kinase                   | AM+K_not_in_group |
| Medtr5g021880  | protein interaction domain protein     | AM+K_not_in_group |
| Medtr3g085330  | human MYND-type zinc finger protein    | AM+K_not_in_group |
| Medtr0276s0010 | (p70)-interacting protein, putative    | AM+K_not_in_group |
| Medtr1g100633  | myosin heavy chain-like protein        | AM+K_not_in_group |
| Medtr2g012990  | class disease resistance protein       | AM+K_not_in_group |
| Medtr3g091180  | plant/T32M21-140 protein               | AM+K_not_in_group |
| Medtr3g094760  | CPR5, putative                         | AM+K_not_in_group |

## diffusion\_prioritization\_ALL

|               |                                     |                   |
|---------------|-------------------------------------|-------------------|
| Medtr4g079680 | ransmembrane protein, putative      | AM+K_not_in_group |
| Medtr4g119390 | always EARLY-like protein           | AM+K_not_in_group |
| Medtr6g086735 | kinesin motor family protein        | AM+K_not_in_group |
| Medtr7g114210 | icle complex subunit-like protein   | AM+K_not_in_group |
| Medtr4g009840 | topless-like protein                | AM+K_not_in_group |
| Medtr5g013910 | cid dehalogenase-like hydrolase     | AM+K_not_in_group |
| Medtr7g099880 | ore complex Nup205-like protein     | AM+K_not_in_group |
| Medtr1g116500 | 2-isopropylmalate synthase          | AM+K_not_in_group |
| Medtr7g102900 | gulatory B subunit family protein   | AM+K_not_in_group |
| Medtr8g006895 | B1D9-TCB1D9B domain protein         | AM+K_not_in_group |
| Medtr3g077950 | kinesin light chain                 | AM+K_not_in_group |
| Medtr4g061180 | l/RBD/RNP motif) family protein     | AM+K_not_in_group |
| Medtr7g093200 | l omega-3 fatty acid desaturase     | AM+K_not_in_group |
| Medtr5g059280 | /Threonine kinase family protein    | AM+K_not_in_group |
| Medtr2g014490 | homeobox domain protein             | AM+K_not_in_group |
| Medtr2g435800 | A dehydrogenase family protein      | AM+K_not_in_group |
| Medtr5g011690 | cornichon family protein            | AM+K_not_in_group |
| Medtr8g020880 | RelA/SpoT-like protein RSH2         | AM+K_not_in_group |
| Medtr2g020830 | ant/F10N7-170 protein, putative     | AM+K_not_in_group |
| Medtr3g498865 | SAM domain protein                  | AM+K_not_in_group |
| Medtr4g068340 | T1.3 protein                        | AM+K_not_in_group |
| Medtr5g071990 | zinc/iron transport family protein  | AM+K_not_in_group |
| Medtr1g061540 | plant/T32M21-140 protein            | AM+K_not_in_group |
| Medtr4g019410 | /Threonine kinase family protein    | AM+K_not_in_group |
| Medtr1g060070 | _s protein IscA (other strand read) | AM+K_not_in_group |
| Medtr2g081000 | _s;17-8 protein (other strand read) | AM+K_not_in_group |
| Medtr4g090620 | _s hydrogenase (other strand read)  | AM+K_not_in_group |
| Medtr5g083050 | embrane OMP85 family protein        | AM+K_not_in_group |
| Medtr7g075030 | _s ange protein (other strand read) | AM+K_not_in_group |
| Medtr8g024100 | /Threonine kinase family protein    | AM+K_not_in_group |
| Medtr7g090710 | eonine-kinase RIO1-like protein     | AM+K_not_in_group |
| Medtr4g083440 | T10 in DGCR region-like protein     | AM+K_not_in_group |
| Medtr2g005620 | shaggy-like kinase dzeta            | AM+K_not_in_group |
| Medtr7g094760 | ponse/antifungal domain protein     | AM+K_not_in_group |
| Medtr5g089340 | porter)-like transporter, putative  | AM+K_not_in_group |
| Medtr7g087070 | alpha/beta fold hydrolase           | AM+K_not_in_group |
| Medtr1g025920 | LA RNA-binding domain protein       | AM+K_not_in_group |
| Medtr1g111560 | factor Spt5-like protein, putative  | AM+K_not_in_group |
| Medtr3g086610 | eductase trans-splicing protein     | AM+K_not_in_group |
| Medtr4g035100 | ein associated factor-like protein  | AM+K_not_in_group |
| Medtr4g068800 | PR containing plant-like protein    | AM+K_not_in_group |
| Medtr5g095510 | Pre-mRNA-splicing factor ISY1       | AM+K_not_in_group |
| Medtr6g008800 | ABC transporter B family protein    | AM+K_not_in_group |
| Medtr7g027680 | GYF domain protein                  | AM+K_not_in_group |
| Medtr7g117220 | THO complex subunit 2               | AM+K_not_in_group |
| Medtr8g077840 | protein 70 kDa protein, putative    | AM+K_not_in_group |
| Medtr1g111180 | hreonine kinase domain protein      | AM+K_not_in_group |
| Medtr7g018890 | receptor-like kinase                | AM+K_not_in_group |
| Medtr5g021980 | YEATS family protein                | AM+K_not_in_group |
| Medtr6g087000 | ucleotide-binding domain protein    | AM+K_not_in_group |
| Medtr2g045490 | nase (acetyl-transferring) kinase   | AM+K_not_in_group |



diffusion\_prioritization\_ALL

|                 |                                    |                   |
|-----------------|------------------------------------|-------------------|
| Medtr3g071450   | membrane OMP85 family protein      | AM+K_not_in_group |
| Medtr6g064960   | oxygenase extradiol-like protein   | AM+K_not_in_group |
| Medtr2g078740   | MAP kinase                         | AM+K_not_in_group |
| Medtr0508s0010  | somal protein S8e family protein   | AM+K_not_in_group |
| Medtr7g056830   | ndent RNA helicase-like protein    | AM+K_not_in_group |
| Medtr7g104350_s | a-3, putative (other strand read)  | AM+K_not_in_group |
| Medtr8g104250   | elongation factor                  | AM+K_not_in_group |
| Medtr3g086530   | kinase AFC1                        | AM+K_not_in_group |
| Medtr2g100590   | ox/RNI/FBD-like domain protein     | AM+K_not_in_group |
| Medtr2g102050   | BZIP protein                       | AM+K_not_in_group |
| Medtr2g103110   | ov34/MPN/PAD-1 family protein      | AM+K_not_in_group |
| Medtr3g070310   | arginyl-tRNA-protein transferase   | AM+K_not_in_group |
| Medtr3g090960   | imidine tract-binding-like protein | AM+K_not_in_group |
| Medtr8g020330   | myb transcription factor           | AM+K_not_in_group |
| Medtr0082s0030  | ribosomal protein S4               | AM+K_not_in_group |
| Medtr0212s0040  | ATP synthase F1, alpha subunit     | AM+K_not_in_group |
| Medtr1g019550   | (TIR-NBS-LRR class), putative      | AM+K_not_in_group |
| Medtr1g022305   | ndent RNA helicase-like protein    | AM+K_not_in_group |
| Medtr1g037310   | 3HC4 type (RING finger) protein    | AM+K_in_group     |
| Medtr1g045680   | hypothetical protein               | AM+K_not_in_group |
| Medtr1g057130   | hypothetical protein               | AM+K_not_in_group |
| Medtr2g009950   | hypothetical protein               | AM+K_not_in_group |
| Medtr2g023280   | UO pollen-like protein, putative   | AM+K_not_in_group |
| Medtr2g049430   | ransmembrane protein, putative     | AM+K_not_in_group |
| Medtr3g082190   | INO80 complex subunit C            | AM+K_not_in_group |
| Medtr3g108360   | zinc finger protein, putative      | AM+K_not_in_group |
| Medtr4g023660   | hypothetical protein               | AM+K_not_in_group |
| Medtr4g023700   | hypothetical protein               | AM+K_not_in_group |
| Medtr4g035690   | hypothetical protein               | AM+K_not_in_group |
| Medtr4g076240   | DnaJ with TPR protein, putative    | AM+K_not_in_group |
| Medtr4g115880   | itin carboxyl-terminal hydrolase   | AM+K_not_in_group |
| Medtr5g007180   | PHD zinc finger protein, putative  | AM+K_not_in_group |
| Medtr5g089765   | ransmembrane protein, putative     | AM+K_not_in_group |
| Medtr6g033895   | tyrosine kinase family protein     | AM+K_not_in_group |
| Medtr7g031880   | ransmembrane protein, putative     | AM+K_not_in_group |
| Medtr7g053100   | ily protein/WD-40 repeat protein   | AM+K_not_in_group |
| Medtr7g075660   | -40 repeat protein/beige protein   | AM+K_not_in_group |
| Medtr7g084880   | transportin-like protein           | AM+K_not_in_group |
| Medtr7g115190   | erase II transcription subunit 14  | AM+K_not_in_group |
| Medtr8g058400   | PR containing plant-like protein   | AM+K_not_in_group |
| Medtr8g059780   | hypothetical protein               | AM+K_not_in_group |
| Medtr8g100045   | ylformylglycinamide synthase       | AM+K_not_in_group |
| Medtr4g094378   | esterase family protein, putative  | AM+K_not_in_group |
| Medtr5g019420   | ie-5)-methyltransferase DRM1/2     | AM+K_not_in_group |
| Medtr6g008140   | ce protein (TIR-NBS-LRR class)     | AM+K_not_in_group |
| Medtr0041s0030  | 2-like protein, nramp transporter  | AM+K_not_in_group |
| Medtr1g032110   | VAC14-like protein                 | AM+K_not_in_group |
| Medtr1g088730   | te hydrolase superfamily protein   | AM+K_not_in_group |
| Medtr1g103830   | PHD zinc finger protein, putative  | AM+K_not_in_group |
| Medtr1g112730   | ubiquitin-conjugating enzyme E2    | AM+K_not_in_group |
| Medtr2g084610   | ein complex AP-2, alpha subunit    | AM+K_not_in_group |

diffusion\_prioritization\_ALL

|                |                                     |                   |
|----------------|-------------------------------------|-------------------|
| Medtr2g087295  | transcription factor-like protein   | AM+K_not_in_group |
| Medtr2g097670  | pumilio Mpt5 protein, putative      | AM+K_not_in_group |
| Medtr3g073080  | 1/mts3/eIF-3 p25 family protein     | AM+K_not_in_group |
| Medtr3g096670  | F-box plant protein, putative       | AM+K_not_in_group |
| Medtr3g098380  | tory burst oxidase-like protein D   | AM+K_not_in_group |
| Medtr4g051565  | transcription factor-like protein   | AM+K_not_in_group |
| Medtr4g121890  | pathway SMK-1 domain protein        | AM+K_not_in_group |
| Medtr4g125690  | IL domain myosin family protein     | AM+K_not_in_group |
| Medtr6g086630  | ARF GTPase activator                | AM+K_not_in_group |
| Medtr7g061540  | E3 ubiquitin-protein ligase         | AM+K_not_in_group |
| Medtr7g091460  | villin                              | AM+K_not_in_group |
| Medtr7g091590  | insulin-degrading enzyme            | AM+K_not_in_group |
| Medtr7g092070  | at CCCH-type zinc finger protein    | AM+K_not_in_group |
| Medtr7g099480  | CLIP-associating-like protein       | AM+K_not_in_group |
| Medtr8g023080  | lylinositol-3-phosphate 5-kinase    | AM+K_not_in_group |
| Medtr8g079040  | doxal phosphate-binding protein     | AM+K_not_in_group |
| Medtr8g085950  | importin beta-3, putative           | AM+K_not_in_group |
| Medtr8g099090  | stassium transporter-like protein   | AM+K_not_in_group |
| Medtr8g107440  | outer arm dynein light chain 1      | AM+K_not_in_group |
| Medtr2g090710  | ceptor-like kinase family protein   | AM+K_in_group     |
| Medtr2g033830  | prefoldin protein                   | AM+K_not_in_group |
| Medtr4g058005  | ump-driving ATPase-like protein     | AM+K_not_in_group |
| Medtr7g115600  | ransmembrane protein, putative      | AM+K_not_in_group |
| Medtr1g064300  | Nop14 nucleolar-like protein        | AM+K_not_in_group |
| Medtr2g036480  | receptor-like kinase                | AM+K_not_in_group |
| Medtr3g080850  | ystathionine gamma-synthase         | AM+K_not_in_group |
| Medtr4g105450  | lylinositol transfer family protein | AM+K_not_in_group |
| Medtr7g079370  | rotein interaction domain protein   | AM+K_not_in_group |
| Medtr8g077760  | hypothetical protein                | AM+K_not_in_group |
| Medtr0314s0030 | xygenase family oxidoreductase      | AM+K_not_in_group |
| Medtr3g092030  | MFS transporter                     | AM+K_not_in_group |
| Medtr8g010580  | tyryl-CoA hydrolase-like protein    | AM+K_not_in_group |
| Medtr4g032925  | hoinositide phosphatase SAC4        | AM+K_not_in_group |
| Medtr7g072330  | sociated protein of TOR protein     | AM+K_not_in_group |
| Medtr7g046260  | ERF domain transcription factor     | AM+K_not_in_group |
| Medtr8g080190  | cyclin-dependent kinase             | AM+K_not_in_group |
| Medtr2g049305  | ce CXC domain protein, putative     | AM+K_not_in_group |
| Medtr7g113540  | PR containing plant-like protein    | AM+K_not_in_group |
| Medtr1g067140  | ceptor Serine/Threonine kinase      | AM+K_not_in_group |
| Medtr2g087880  | condensin complex subunit 2         | AM+K_not_in_group |
| Medtr5g091110  | NOL1/NOP2/sun family protein        | AM+K_not_in_group |
| Medtr1g057850  | ctulosonate cytidyltransferase      | AM+K_not_in_group |
| Medtr5g005710  | precursor GPI-anchored protein      | AM+K_not_in_group |
| Medtr1g077190  | hypothetical protein                | AM+K_not_in_group |
| Medtr2g005240  | auxin response factor 2             | AM+K_not_in_group |
| Medtr2g069550  | sociated protein PAT1, putative     | AM+K_not_in_group |
| Medtr2g435530  | lyglycerol lipase, amino-terminal   | AM+K_not_in_group |
| Medtr4g065050  | hypothetical protein                | AM+K_not_in_group |
| Medtr4g068940  | itin-protein ligase ARI3, putative  | AM+K_not_in_group |
| Medtr5g081880  | hypothetical protein                | AM+K_not_in_group |
| Medtr5g098980  | BZIP transcription factor           | AM+K_not_in_group |

diffusion\_prioritization\_ALL

|                                                    |                   |
|----------------------------------------------------|-------------------|
| Medtr4g052950 ion repressor NC2, beta subunit      | AM+K_not_in_group |
| Medtr1g032450 40S ribosomal protein S2-4           | AM+K_not_in_group |
| Medtr4g070040 synthetase alpha chain, putative     | AM+K_not_in_group |
| Medtr1g053955 helicase                             | AM+K_not_in_group |
| Medtr1g068930 PHD zinc finger protein              | AM+K_not_in_group |
| Medtr1g083120 on factor jumonji domain protein     | AM+K_not_in_group |
| Medtr2g082910 n, A TM vesicle-mediated sorter      | AM+K_not_in_group |
| Medtr3g079840 /l-terminal hydrolase-like protein   | AM+K_not_in_group |
| Medtr4g107290 transportin-like protein             | AM+K_not_in_group |
| Medtr5g082840 leotide-binding protein, putative    | AM+K_not_in_group |
| Medtr7g073480 ransporting ATPase-like protein      | AM+K_not_in_group |
| Medtr7g107440 ter-chromatide cohesion protein      | AM+K_not_in_group |
| Medtr7g451340 n initiation factor 4G-like protein  | AM+K_not_in_group |
| Medtr8g008680 n initiation factor 4G-like protein  | AM+K_not_in_group |
| Medtr8g089925 l integral membrane-like protein     | AM+K_not_in_group |
| Medtr8g092100 hypothetical protein                 | AM+K_not_in_group |
| Medtr6g059930 APO RNA-binding protein              | AM+K_not_in_group |
| Medtr7g013770 yst subunit exo70 family protein     | AM+K_not_in_group |
| Medtr4g127560 alcium-binding EF-hand protein       | AM+K_not_in_group |
| Medtr1g067660 s2 zinc finger transcription factor  | AM+K_not_in_group |
| Medtr0036s0150 C transcription factor-like protein | AM+K_not_in_group |
| Medtr1g021250 icopeptide (PPR) repeat protein      | AM+K_not_in_group |
| Medtr1g054535 catabolite repressor-like protein    | AM+K_not_in_group |
| Medtr1g069140 RNA recognition motif                | AM+K_not_in_group |
| Medtr1g071620 hypothetical protein                 | AM+K_not_in_group |
| Medtr1g090877 associated-like protein, putative    | AM+K_not_in_group |
| Medtr1g102130 re carboxypeptidase-like protein     | AM+K_not_in_group |
| Medtr1g105415 ribosomal protein S8                 | AM+K_not_in_group |
| Medtr2g006170 60S ribosomal protein L27-1          | AM+K_not_in_group |
| Medtr2g009690 dynamin 3A-like protein              | AM+K_not_in_group |
| Medtr2g097970 Rab5-interacting family protein      | AM+K_not_in_group |
| Medtr3g051280 hypothetical protein                 | AM+K_not_in_group |
| Medtr3g077350 GroES chaperonin                     | AM+K_not_in_group |
| Medtr3g093790 icid-binding, OB-fold-like protein   | AM+K_not_in_group |
| Medtr3g102420 rected RNA polymerase subunit        | AM+K_not_in_group |
| Medtr3g117580 tRNA-dihydrouridine synthase         | AM+K_not_in_group |
| Medtr4g034690 Clp protease proteolytic protein     | AM+K_not_in_group |
| Medtr4g046710_s etical protein (other strand read) | AM+K_not_in_group |
| Medtr4g117680 itiation factor ia protein, putative | AM+K_not_in_group |
| Medtr4g127330 /RBD/RNP motif) family protein       | AM+K_not_in_group |
| Medtr6g034550 HSP90 co-chaperone                   | AM+K_not_in_group |
| Medtr6g088710_s etical protein (other strand read) | AM+K_not_in_group |
| Medtr7g057250 x ATP-dependent RNA helicase         | AM+K_not_in_group |
| Medtr7g065100 iRNA-associated-like-Smprotein       | AM+K_not_in_group |
| Medtr8g085740 60S ribosomal protein L32-1          | AM+K_not_in_group |
| Medtr8g104380 in amino-terminal region protein     | AM+K_not_in_group |
| Medtr1g097110 osphate 5-kinase family protein      | AM+K_not_in_group |
| Medtr2g026310 transcriptional adapter ADA2a        | AM+K_not_in_group |
| Medtr2g040470 plant/F27B13-30 protein              | AM+K_not_in_group |
| Medtr2g105810 rase II transcription subunit 33A    | AM+K_not_in_group |
| Medtr3g028190 akorin RING-zinc-finger protein      | AM+K_not_in_group |

## diffusion\_prioritization\_ALL

|                                                    |                   |
|----------------------------------------------------|-------------------|
| Medtr3g117490 inc finger CCCH domain protein       | AM+K_not_in_group |
| Medtr4g072130_s rase E chain (other strand read)   | AM+K_not_in_group |
| Medtr4g092430 rome C biogenesis protein ccsA       | AM+K_not_in_group |
| Medtr5g093880 ε-rich glycoprotein family protein   | AM+K_not_in_group |
| Medtr6g012450 nger DNA-binding family protein      | AM+K_not_in_group |
| Medtr7g087047 iger (Ran-binding) family protein    | AM+K_not_in_group |
| Medtr8g022980 ght DNA-binding domain protein       | AM+K_not_in_group |
| Medtr8g076080 CH-type) family protein, putative    | AM+K_not_in_group |
| Medtr8g105780 heat shock transcription factor      | AM+K_not_in_group |
| Medtr1g090657 shugoshin protein                    | AM+K_not_in_group |
| Medtr1g114530 rotate dehydrogenase (quinone)       | AM+K_not_in_group |
| Medtr4g102820 3PI transamidase subunit PIG-U       | AM+K_not_in_group |
| Medtr7g115340 poly(rC)-binding-like protein        | AM+K_not_in_group |
| Medtr8g058970 ox/RNI/FBD-like domain protein       | AM+K_not_in_group |
| Medtr1g108290 acting nucleolar phosphoprotein      | AM+K_not_in_group |
| Medtr7g115280 ankyrin repeat protein               | AM+K_not_in_group |
| Medtr1g083040 always EARLY-like protein            | AM+K_not_in_group |
| Medtr4g031680 tor, large subunit, splicing factor  | AM+K_not_in_group |
| Medtr5g090430 pendent RNA helicase, putative       | AM+K_not_in_group |
| Medtr6g005010 ein resurrection protein, putative   | AM+K_not_in_group |
| Medtr6g080360 myb transcription factor             | AM+K_not_in_group |
| Medtr7g106190 /beta-catenin-like repeat protein    | AM+K_not_in_group |
| Medtr8g015930 embryo defective 140 protein         | AM+K_not_in_group |
| Medtr2g054780 acyl-protein thioesterase            | AM+K_not_in_group |
| Medtr4g083250 326410) TAIR;Acc:AT4G26410]          | AM+K_not_in_group |
| Medtr4g097580 constituent-like protein, putative   | AM+K_not_in_group |
| Medtr7g009330 : anion-selective channel protein    | AM+K_not_in_group |
| Medtr5g059210 ubiquitin-fold modifier 1            | AM+K_not_in_group |
| Medtr5g092960 ox/RNI/FBD-like domain protein       | AM+K_not_in_group |
| Medtr5g011000 DNA-directed RNA polymerase          | AM+K_not_in_group |
| Medtr0152s0100 hypothetical protein                | AM+K_not_in_group |
| Medtr0340s0030_s main protein (other strand read)  | AM+K_not_in_group |
| Medtr1g030760 aconase/LRE-like region protein      | AM+K_not_in_group |
| Medtr1g053470 importin subunit alpha               | AM+K_not_in_group |
| Medtr1g068690 hypothetical protein                 | AM+K_in_group     |
| Medtr1g092970 hypothetical protein                 | AM+K_not_in_group |
| Medtr2g086200 hypothetical protein                 | AM+K_not_in_group |
| Medtr3g011350 hypothetical protein                 | AM+K_not_in_group |
| Medtr3g023150_s 3LD1 protein (other strand read)   | AM+K_not_in_group |
| Medtr3g024450 LRR resistance protein, putative     | AM+K_not_in_group |
| Medtr3g060860 ransmembrane protein, putative       | AM+K_not_in_group |
| Medtr3g091503 hypothetical protein                 | AM+K_not_in_group |
| Medtr3g101390 hypothetical protein                 | AM+K_not_in_group |
| Medtr4g020590 1 (TIR-NBS-LRR class), putative      | AM+K_not_in_group |
| Medtr4g022660 NHL domain protein                   | AM+K_not_in_group |
| Medtr4g024735_s etical protein (other strand read) | AM+K_not_in_group |
| Medtr4g101245 ransmembrane protein, putative       | AM+K_not_in_group |
| Medtr4g124820 hypothetical protein                 | AM+K_not_in_group |
| Medtr4g132363 hypothetical protein                 | AM+K_not_in_group |
| Medtr5g007060 ylenetetrahydrofolate reductase      | AM+K_not_in_group |
| Medtr5g020870_s tein, putative (other strand read) | AM+K_not_in_group |

diffusion\_prioritization\_ALL

|                 |                                    |                   |
|-----------------|------------------------------------|-------------------|
| Medtr5g043900   | ransmembrane protein, putative     | AM+K_not_in_group |
| Medtr5g085540   | hypothetical protein               | AM+K_not_in_group |
| Medtr5g430520   | hypothetical protein               | AM+K_not_in_group |
| Medtr6g005430   | hypothetical protein               | AM+K_not_in_group |
| Medtr6g016425_s | etical protein (other strand read) | AM+K_not_in_group |
| Medtr6g044400   | hypothetical protein               | AM+K_not_in_group |
| Medtr7g067460   | cpn60 chaperonin family protein    | AM+K_not_in_group |
| Medtr7g091690   | rter (SP) family MFS transporter   | AM+K_not_in_group |
| Medtr7g092645   | hypothetical protein               | AM+K_not_in_group |
| Medtr7g094180   | hypothetical protein               | AM+K_not_in_group |
| Medtr7g111640   | hypothetical protein               | AM+K_not_in_group |
| Medtr8g011890   | olymerase II, Rpb4, core protein   | AM+K_not_in_group |
| Medtr8g039910_s | )-LRR class) (other strand read)   | AM+K_not_in_group |
| Medtr8g051620   | hypothetical protein               | AM+K_not_in_group |
| Medtr8g092710   | hypothetical protein               | AM+K_not_in_group |
| Medtr8g096220   | hypothetical protein               | AM+K_not_in_group |
| Medtr1g020000   | phoesterase superfamily protein    | AM+K_not_in_group |
| Medtr7g056337   | in retaining receptor-like protein | AM+K_not_in_group |
| Medtr7g109960   | osylation factor-like protein A1D  | AM+K_not_in_group |
| Medtr1g038570   | like complex subunit-like protein  | AM+K_not_in_group |
| Medtr2g022910   | inc finger MYND domain protein     | AM+K_not_in_group |
| Medtr4g071850   | lymerase I subunit B-like protein  | AM+K_not_in_group |
| Medtr4g123090   | alactosyltransferase-like protein  | AM+K_not_in_group |
| Medtr7g075170   | and zinc finger protein, putative  | AM+K_not_in_group |
| Medtr8g093880   | ase PMT26-like protein, putative   | AM+K_not_in_group |
| Medtr0425s0020  | main disease resistance protein    | AM+K_not_in_group |
| Medtr1g051055   | thyltransferase PMT16, putative    | AM+K_not_in_group |
| Medtr1g109490   | elongator complex-like protein     | AM+K_not_in_group |
| Medtr4g074870   | te hydrolase superfamily protein   | AM+K_not_in_group |
| Medtr1g082950   | an-binding LysM domain protein     | AM+K_not_in_group |
| Medtr3g096860   | DUF3727 family protein             | AM+K_not_in_group |
| Medtr4g012810   | hypothetical protein               | AM+K_not_in_group |
| Medtr4g037515   | tRNA-dihydrouridine synthase       | AM+K_not_in_group |
| Medtr5g017490   | case eIF4A-like protein, putative  | AM+K_not_in_group |
| Medtr8g064490   | NA m2A2503 methyltransferase       | AM+K_not_in_group |
| Medtr8g099770   | cyclin-dependent kinase C          | AM+K_not_in_group |
| Medtr2g016140   | transcription factor               | AM+K_not_in_group |
| Medtr3g071640   | autophagy-related protein          | AM+K_not_in_group |
| Medtr3g088510   | 8-oxoguanine-DNA glycosylase       | AM+K_not_in_group |
| Medtr3g116250   | osphatidylinositol 4-kinase alpha  | AM+K_not_in_group |
| Medtr4g124980   | pectin lyase superfamily protein   | AM+K_not_in_group |
| Medtr5g021410_s | 2-like protein (other strand read) | AM+K_not_in_group |
| Medtr6g004930   | DNA-binding protein, putative      | AM+K_not_in_group |
| Medtr7g082150   | small nuclear ribonucleoprotein    | AM+K_not_in_group |
| Medtr7g088700   | global transcription factor        | AM+K_not_in_group |
| Medtr8g013660   | 3HC4 type (RING finger) protein    | AM+K_not_in_group |
| Medtr8g033180   | re O-acyltransferase-like protein  | AM+K_not_in_group |
| Medtr8g067420   | tRNA-dihydrouridine synthase       | AM+K_not_in_group |
| Medtr3g107960   | histone acetylation protein        | AM+K_not_in_group |
| Medtr2g089360   | e Serine/Threonine-kinase plant    | AM+K_not_in_group |
| Medtr2g028730   | Trm112p-like protein               | AM+K_not_in_group |

## diffusion\_prioritization\_ALL

|                 |                                     |                   |
|-----------------|-------------------------------------|-------------------|
| Medtr2g089170   | ponsive element-binding protein     | AM+K_not_in_group |
| Medtr3g019370   | olar IMP4-like ribonucleoprotein    | AM+K_not_in_group |
| Medtr4g009100   | 30S ribosomal protein S15           | AM+K_not_in_group |
| Medtr4g032680   | γ-ptidyl-prolyl cis-trans isomerase | AM+K_not_in_group |
| Medtr4g074260   | 30e/S12e/Gadd45 family protein      | AM+K_not_in_group |
| Medtr4g103790   | ΨA processing ribonucleoprotein     | AM+K_not_in_group |
| Medtr4g127640   | αe-dependent methyltransferase      | AM+K_not_in_group |
| Medtr5g008680   | γ-ptidyl-prolyl cis-trans isomerase | AM+K_not_in_group |
| Medtr5g087520   | subunit processome component        | AM+K_not_in_group |
| Medtr6g091790   | hypothetical protein                | AM+K_not_in_group |
| Medtr7g024560   | hypothetical protein                | AM+K_not_in_group |
| Medtr7g053520   | 50S ribosomal protein L7/L12        | AM+K_not_in_group |
| Medtr8g024350   | 60S acidic ribosomal protein        | AM+K_not_in_group |
| Medtr3g077250   | an aminotransferase-like protein    | AM+K_not_in_group |
| Medtr4g046033   | hypothetical protein                | AM+K_not_in_group |
| Medtr4g113280   | oacyl-CoA synthase-like protein     | AM+K_not_in_group |
| Medtr5g006570   | icopeptide (PPR) repeat protein     | AM+K_not_in_group |
| Medtr8g102760   | γPR containing plant-like protein   | AM+K_not_in_group |
| Medtr7g118020   | lin-domain kinase CDPK protein      | AM+K_not_in_group |
| Medtr3g088580   | F-box only protein                  | AM+K_not_in_group |
| Medtr7g081260   | all MutS-related) domain protein    | AM+K_not_in_group |
| Medtr8g031480   | ionyl-CoA carboxylase, putative     | AM+K_not_in_group |
| Medtr8g024690   | ike DNA-binding domain protein      | AM+K_not_in_group |
| Medtr1g029720   | TPR repeat protein                  | AM+K_not_in_group |
| Medtr1g082740   | Ψ4-type RING zinc finger protein    | AM+K_not_in_group |
| Medtr3g109700   | γdrolase II (PTH2) family protein   | AM+K_not_in_group |
| Medtr8g102710   | γPR containing plant-like protein   | AM+K_not_in_group |
| Medtr5g053610   | LRR Di-glucose-binding protein      | AM+K_not_in_group |
| Medtr0027s0250  | 50S ribosomal protein L20           | AM+K_not_in_group |
| Medtr1g024980   | C2H2-like zinc finger protein       | AM+K_not_in_group |
| Medtr7g115650   | myb transcription factor            | AM+K_not_in_group |
| Medtr2g099780   | calmodulin-binding motif protein    | AM+K_not_in_group |
| Medtr4g070910   | ΨA processing ribonucleoprotein     | AM+K_not_in_group |
| Medtr1g032930   | receptor-like kinase                | AM+K_not_in_group |
| Medtr1g080390   | 1/RBD/RNP motif) family protein     | AM+K_not_in_group |
| Medtr2g030390   | KRI1-like protein                   | AM+K_not_in_group |
| Medtr3g072480   | chaperone domain CHZ protein        | AM+K_not_in_group |
| Medtr3g091250   | ing factor 3a subunit 3, putative   | AM+K_not_in_group |
| Medtr4g023470   | onaJ-class molecular chaperone      | AM+K_not_in_group |
| Medtr5g070100   | γ motif (RRM) containing protein    | AM+K_not_in_group |
| Medtr1g034785   | transducin/WD40 repeat protein      | AM+K_not_in_group |
| Medtr4g056600   | RING/U-box protein                  | AM+K_not_in_group |
| Medtr7g093720   | te hydrolase superfamily protein    | AM+K_not_in_group |
| Medtr8g078690   | ransmembrane protein, putative      | AM+K_not_in_group |
| Medtr8g086300   | SCAR3-like protein                  | AM+K_not_in_group |
| Medtr8g013860   | omain class transcription factor    | AM+K_not_in_group |
| Medtr1g023000_s | 3-like protein (other strand read)  | AM+K_not_in_group |
| Medtr3g023150   | defective 1 protein/ELD1 protein    | AM+K_not_in_group |
| Medtr3g095530   | actin-related protein 4A            | AM+K_not_in_group |
| Medtr3g100050_s | ription factor (other strand read)  | AM+K_not_in_group |
| Medtr3g109090   | nucleolysin TIAR-like protein       | AM+K_not_in_group |

## diffusion\_prioritization\_ALL

|               |                                       |                   |
|---------------|---------------------------------------|-------------------|
| Medtr7g067530 | ceptor-like kinase family protein     | AM+K_not_in_group |
| Medtr2g462010 | COBRA-like protein 2 precursor        | AM+K_not_in_group |
| Medtr5g034910 | IA-like transporter family protein    | AM+K_not_in_group |
| Medtr4g056390 | serine kinase-like protein            | AM+K_not_in_group |
| Medtr2g020240 | beta-amylase                          | AM+K_not_in_group |
| Medtr3g069620 | guanylyl cyclase                      | AM+K_not_in_group |
| Medtr8g007485 | 60S ribosomal protein L37a-2          | AM+K_not_in_group |
| Medtr8g017210 | -like zinc finger protein, putative   | AM+K_not_in_group |
| Medtr6g029240 | ylsulfate reductase-like protein      | AM+K_not_in_group |
| Medtr2g099450 | Chitinase (Class IV) / Hevein         | AM+K_not_in_group |
| Medtr4g014160 | main disease resistance protein       | AM+K_not_in_group |
| Medtr5g035665 | DUF1262 family protein                | AM+K_not_in_group |
| Medtr1g007460 | hypothetical protein                  | AM+K_not_in_group |
| Medtr1g102630 | otic translation initiation factor 2c | AM+K_not_in_group |
| Medtr3g117100 | dylinositol transfer family protein   | AM+K_not_in_group |
| Medtr3g118200 | -1-phosphate uridylyltransferase      | AM+K_not_in_group |
| Medtr4g052530 | M28 Zn-peptidase nicastrin            | AM+K_not_in_group |
| Medtr5g040360 | yltransferase PMT2-like protein       | AM+K_not_in_group |
| Medtr7g077410 | beta-amylase-like protein             | AM+K_not_in_group |
| Medtr2g069050 | n elongation factor EF-2 subunit      | AM+K_not_in_group |
| Medtr3g055590 | cell division FtsZ-like protein       | AM+K_not_in_group |
| Medtr5g068650 | protein subunit POP5, putative        | AM+K_not_in_group |
| Medtr7g088560 | RING-finger ubiquitin ligase          | AM+K_not_in_group |
| Medtr8g066180 | translin-associated factor X          | AM+K_not_in_group |
| Medtr7g020850 | receptor-like kinase                  | AM+K_not_in_group |
| Medtr7g010210 | R2R3-myb transcription factor         | AM+K_not_in_group |
| Medtr5g006420 | ript processing protein, putative     | AM+K_not_in_group |
| Medtr6g088010 | RNA-directed RNA polymerase II        | AM+K_not_in_group |
| Medtr3g029530 | icopeptide (PPR) repeat protein       | AM+K_not_in_group |
| Medtr1g052885 | alcium-binding EF-hand protein        | AM+K_not_in_group |
| Medtr1g010040 | itin carboxyl-terminal hydrolase      | AM+K_not_in_group |
| Medtr2g021310 | /beta-catenin-like repeat protein     | AM+K_not_in_group |
| Medtr3g101590 | LNS2 (lipin/Ned1/Smp2) protein        | AM+K_not_in_group |
| Medtr4g087210 | g nexin carboxy-terminal protein      | AM+K_not_in_group |
| Medtr5g079920 | affected trafficking protein          | AM+K_not_in_group |
| Medtr6g004510 | le tethering-like protein, putative   | AM+K_not_in_group |
| Medtr8g012560 | orting protein 39 domain protein      | AM+K_not_in_group |
| Medtr8g064470 | carboxy-terminal domain protein       | AM+K_not_in_group |
| Medtr8g085210 | beta-galactosidase                    | AM+K_not_in_group |
| Medtr8g087730 | ulatory protein (seipin), putative    | AM+K_not_in_group |
| Medtr4g128650 | main kinase superfamily protein       | AM+K_not_in_group |
| Medtr5g088350 | CBL-interacting kinase                | AM+K_not_in_group |
| Medtr2g025420 | iated interaction domain protein      | AM+K_not_in_group |
| Medtr3g089100 | ase superfamily protein, putative     | AM+K_not_in_group |
| Medtr1g090630 | rt factor 2 (NTF2) family protein     | AM+K_not_in_group |
| Medtr1g092860 | IP motif) family protein, putative    | AM+K_not_in_group |
| Medtr1g046360 | halogenase superfamily protein        | AM+K_not_in_group |
| Medtr1g095780 | substrate carrier family protein      | AM+K_not_in_group |
| Medtr1g098590 | BZIP transcription factor             | AM+K_not_in_group |
| Medtr4g014040 | ation inhibition factor-like protein  | AM+K_not_in_group |
| Medtr4g049300 | hypothetical protein                  | AM+K_not_in_group |

diffusion\_prioritization\_ALL

|               |                                            |                   |
|---------------|--------------------------------------------|-------------------|
| Medtr4g074440 | mRNA-processing protein 40C                | AM+K_not_in_group |
| Medtr4g081200 | NDR1-like protein                          | AM+K_not_in_group |
| Medtr4g107890 | in ZAP, related protein, putative          | AM+K_not_in_group |
| Medtr4g109510 | at shock family protein, putative          | AM+K_not_in_group |
| Medtr5g006350 | hypothetical protein                       | AM+K_not_in_group |
| Medtr5g023020 | DNA-directed RNA polymerase                | AM+K_not_in_group |
| Medtr5g029070 | DUF3444 domain protein                     | AM+K_not_in_group |
| Medtr5g034430 | ecognition motif protein, putative         | AM+K_not_in_group |
| Medtr5g037120 | ransmembrane protein, putative             | AM+K_not_in_group |
| Medtr5g089380 | s etical protein (other strand read)       | AM+K_not_in_group |
| Medtr5g091710 | opomyosin-like protein, putative           | AM+K_not_in_group |
| Medtr7g032110 | ubiquitin-protein ligase, putative         | AM+K_not_in_group |
| Medtr7g057760 | hypothetical protein                       | AM+K_not_in_group |
| Medtr7g074520 | ransmembrane protein, putative             | AM+K_not_in_group |
| Medtr7g092280 | ate acyltransferase-like protein           | AM+K_not_in_group |
| Medtr4g134210 | responsive NPH3 family protein             | AM+K_not_in_group |
| Medtr7g095100 | plant/T24G3-80 protein                     | AM+K_not_in_group |
| Medtr5g021290 | ceptor-like kinase family protein          | AM+K_not_in_group |
| Medtr1g116820 | EAD-box helicase family protein            | AM+K_not_in_group |
| Medtr2g031960 | 50S ribosomal protein L7/L12               | AM+K_not_in_group |
| Medtr2g095830 | protein/HAD-superfamily protein            | AM+K_not_in_group |
| Medtr3g068085 | )-binding rossmann-fold protein            | AM+K_not_in_group |
| Medtr3g083530 | elongation factor P, putative              | AM+K_not_in_group |
| Medtr3g092930 | hypothetical protein                       | AM+K_not_in_group |
| Medtr5g007850 | rane protease subunit, putative            | AM+K_not_in_group |
| Medtr7g093210 | . polymerase delta small subunit           | AM+K_not_in_group |
| Medtr8g066290 | Y rich carboxy-terminal protein            | AM+K_not_in_group |
| Medtr8g087480 | hypothetical protein                       | AM+K_not_in_group |
| Medtr1g058390 | LETM1-like protein                         | AM+K_not_in_group |
| Medtr1g071810 | hypothetical protein                       | AM+K_not_in_group |
| Medtr1g084610 | neutral/alkaline invertase                 | AM+K_not_in_group |
| Medtr1g112870 | olar-type H <sup>+</sup> -ATPase subunit B | AM+K_not_in_group |
| Medtr1g115790 | x ABC transporter family protein           | AM+K_not_in_group |
| Medtr2g034040 | phytochrome protein B                      | AM+K_not_in_group |
| Medtr2g088450 | glutamate receptor 3.2                     | AM+K_not_in_group |
| Medtr4g021750 | ribonuclease II                            | AM+K_not_in_group |
| Medtr4g084020 | trypsin family protein                     | AM+K_not_in_group |
| Medtr4g116980 | illin neddylation protein, putative        | AM+K_not_in_group |
| Medtr4g120130 | id beta-oxidation MFP-A protein            | AM+K_not_in_group |
| Medtr4g124590 | lylinositol-3-phosphate 5-kinase           | AM+K_not_in_group |
| Medtr4g132780 | 70)-interacting protein, putative          | AM+K_not_in_group |
| Medtr5g013790 | P-dependent protease, putative             | AM+K_not_in_group |
| Medtr5g069780 | c metalloprotease FTSH protein             | AM+K_not_in_group |
| Medtr7g024000 | zinc-finger protein, putative              | AM+K_not_in_group |
| Medtr7g106250 | alactosyldiacylglycerol synthase           | AM+K_not_in_group |
| Medtr7g109530 | lutamyl endopeptidase, putative            | AM+K_not_in_group |
| Medtr7g111570 | e or glycosyl hydrolase, putative          | AM+K_not_in_group |
| Medtr8g073335 | transducin/WD40 repeat protein             | AM+K_not_in_group |
| Medtr8g079492 | auxin response factor 2                    | AM+K_not_in_group |
| Medtr8g089810 | sensor kinase                              | AM+K_not_in_group |
| Medtr8g102460 | hexokinase                                 | AM+K_not_in_group |



diffusion\_prioritization\_ALL

|                |                                    |                   |
|----------------|------------------------------------|-------------------|
| Medtr4g100650  | ethylene response factor           | AM+K_not_in_group |
| Medtr5g083370  | sorting nexin 2B                   | AM+K_not_in_group |
| Medtr1g018680  | carboxy-terminal domain cyclin     | AM+K_not_in_group |
| Medtr2g012750  | : (TAIR:plant.1) protein, putative | AM+K_not_in_group |
| Medtr5g081410  | anyl-nucleotide exchange factor    | AM+K_not_in_group |
| Medtr5g011840  | LRR receptor-like kinase           | AM+K_not_in_group |
| Medtr3g005770  | er chromatid cohesion 1 protein    | AM+K_not_in_group |
| Medtr6g017265  | oamine-oxidase A repressor R1      | AM+K_not_in_group |
| Medtr5g074345  | ransmembrane protein, putative     | AM+K_not_in_group |
| Medtr2g089210  | :alcium-binding EF-hand protein    | AM+K_not_in_group |
| Medtr8g012450  | cyclin-dependent kinase            | AM+K_not_in_group |
| Medtr1g101100  | ase III subunit RPC3-like protein  | AM+K_not_in_group |
| Medtr6g060845  | hyl-CpG-binding domain protein     | AM+K_not_in_group |
| Medtr2g008360  | ryogenesis receptor-like kinase    | AM+K_not_in_group |
| Medtr6g012180  | R2R3-myb transcription factor      | AM+K_not_in_group |
| Medtr8g031100  | notif DNA-binding family protein   | AM+K_not_in_group |
| Medtr2g079310  | DUF2921 family protein             | AM+K_not_in_group |
| Medtr3g073590  | protein disulfide oxidoreductase   | AM+K_not_in_group |
| Medtr3g096840  | o acid transporter family protein  | AM+K_not_in_group |
| Medtr5g085790  | rsM-domain receptor-like kinase    | AM+K_not_in_group |
| Medtr7g082520  | ribosomal-like protein, putative   | AM+K_not_in_group |
| Medtr3g095340  | alginate lyase                     | AM+K_not_in_group |
| Medtr2g031380  | rnal effect embryo arrest protein  | AM+K_not_in_group |
| Medtr3g019010  | ctor complex subunit-like protein  | AM+K_not_in_group |
| Medtr3g104080  | ie TIP49 TBP-interacting protein   | AM+K_not_in_group |
| Medtr5g018390  | coprotein family protein, putative | AM+K_not_in_group |
| Medtr6g463300  | HIT zinc finger protein            | AM+K_not_in_group |
| Medtr8g081030  | Tic22 family protein               | AM+K_not_in_group |
| Medtr3g094860  | 60S ribosomal L6-like protein      | AM+K_not_in_group |
| Medtr4g123670  | /beta-catenin-like repeat protein  | AM+K_not_in_group |
| Medtr8g063090  | hypothetical protein               | AM+K_not_in_group |
| Medtr2g012630  | lo repeat subunit B1-like protein  | AM+K_not_in_group |
| Medtr3g106230  | zinc finger-like protein           | AM+K_not_in_group |
| Medtr4g116320  | rotein interaction domain protein  | AM+K_not_in_group |
| Medtr4g094588  | VRKY family transcription factor   | AM+K_not_in_group |
| Medtr2g027240  | /Threonine kinase family protein   | AM+K_not_in_group |
| Medtr2g043380  | ceptor-like tyrosine-kinase plant  | AM+K_not_in_group |
| Medtr5g088990  | plastocyanin-like domain protein   | AM+K_not_in_group |
| Medtr4g014430  | chome birefringence-like protein   | AM+K_not_in_group |
| Medtr5g058140  | emp24/gp25L/p24 family protein     | AM+K_not_in_group |
| Medtr7g016910  | icopeptide (PPR) repeat protein    | AM+K_not_in_group |
| Medtr7g063440  | n regulator RCC1 repeat protein    | AM+K_not_in_group |
| Medtr4g103600  | atin remodeling complex subunit    | AM+K_not_in_group |
| Medtr5g018790  | OTU-like cysteine protease         | AM+K_not_in_group |
| Medtr7g451450  | acetylmethionine aminotransferase  | AM+K_not_in_group |
| Medtr1g099490  | F-box-like protein                 | AM+K_not_in_group |
| Medtr3g498775  | ripening-regulated protein         | AM+K_not_in_group |
| Medtr0276s0040 | DUF4057 family protein             | AM+K_not_in_group |
| Medtr4g078690  | ransmembrane protein, putative     | AM+K_not_in_group |
| Medtr4g099260  | gh-affinity potassium transporter  | AM+K_not_in_group |
| Medtr7g100240  | atase family, 2C domain protein    | AM+K_in_group     |

diffusion\_prioritization\_ALL

|                |                                      |                   |
|----------------|--------------------------------------|-------------------|
| Medtr1g059890  | hypothetical protein                 | AM+K_not_in_group |
| Medtr7g108500  | Wee1-like kinase 1-B                 | AM+K_not_in_group |
| Medtr4g059560  | Threonine kinase family protein      | AM+K_not_in_group |
| Medtr1g009200  | peptide/nitrate transporter plant    | AM+K_not_in_group |
| Medtr1g111060  | retinal protein (other strand read)  | AM+K_not_in_group |
| Medtr3g071580  | rate phosphatase Phylla protein      | AM+K_not_in_group |
| Medtr8g097210  | MACPF domain protein                 | AM+K_not_in_group |
| Medtr4g011550  | zein-binding protein                 | AM+K_not_in_group |
| Medtr4g094415  | inase kinase kinase-like protein     | AM+K_not_in_group |
| Medtr4g106810  | calmodulin-binding protein           | AM+K_not_in_group |
| Medtr6g022720  | gulatory B subunit family protein    | AM+K_not_in_group |
| Medtr7g101730  | ransmembrane protein, putative       | AM+K_not_in_group |
| Medtr8g079100  | hypothetical protein                 | AM+K_not_in_group |
| Medtr7g092260  | adenylosuccinate synthetase          | AM+K_not_in_group |
| Medtr3g049113  | hypothetical protein                 | AM+K_not_in_group |
| Medtr4g012590  | hypothetical protein                 | AM+K_not_in_group |
| Medtr5g007300  | myb transcription factor             | AM+K_not_in_group |
| Medtr6g088260  | se protein (TIR-NBS-LRR class)       | AM+K_not_in_group |
| Medtr7g076710  | reonine-kinase RIO1-like protein     | AM+K_not_in_group |
| Medtr7g092140  |                                      | AM+K_not_in_group |
| Medtr1g081800  | kinesin motor domain protein         | AM+K_not_in_group |
| Medtr8g062110  | innamyl alcohol dehydrogenase        | AM+K_not_in_group |
| Medtr3g101780  | esponse element-binding factor       | AM+K_not_in_group |
| Medtr4g082340  | ehydration stress) family protein    | AM+K_not_in_group |
| Medtr4g117360  | DUF21 domain plant protein           | AM+K_not_in_group |
| Medtr5g026960  | cyclin-dependent kinase              | AM+K_not_in_group |
| Medtr2g007880  | transferase family protein           | AM+K_not_in_group |
| Medtr7g080180  | re carboxypeptidase-like protein     | AM+K_not_in_group |
| Medtr4g092700  | elix DNA-binding domain protein      | AM+K_not_in_group |
| Medtr5g011410  | ceptor-like kinase family protein    | AM+K_not_in_group |
| Medtr1g029520  | CT domain protein which protein      | AM+K_not_in_group |
| Medtr2g096670  | aric acid resistance-like protein    | AM+K_not_in_group |
| Medtr4g098800  | peptide transporter                  | AM+K_not_in_group |
| Medtr5g014150  | peptide transporter                  | AM+K_not_in_group |
| Medtr8g027620  | calcineurin B-like protein 4-1       | AM+K_not_in_group |
| Medtr0026s0160 | ylglycerol kinase domain protein     | AM+K_not_in_group |
| Medtr0049s0070 | IP-interacting kinase-like protein   | AM+K_not_in_group |
| Medtr0064s0160 | rotein interaction domain protein    | AM+K_not_in_group |
| Medtr0122s0020 | expansin-like protein B1             | AM+K_not_in_group |
| Medtr0172s0010 | DNA topoisomerase type I             | AM+K_not_in_group |
| Medtr0184s0030 | ucosyltransferase family protein     | AM+K_not_in_group |
| Medtr0194s0030 | tyrosine kinase family protein       | AM+K_not_in_group |
| Medtr1g007420  | esterase family protein, putative    | AM+K_not_in_group |
| Medtr1g007860  | alpha/beta fold hydrolase            | AM+K_not_in_group |
| Medtr1g008050  | lycin C induced protein, putative    | AM+K_not_in_group |
| Medtr1g009840  | stid developmental protein DAG       | AM+K_not_in_group |
| Medtr1g011280  | racting domain protein, putative     | AM+K_not_in_group |
| Medtr1g012620  | s n-like protein (other strand read) | AM+K_not_in_group |
| Medtr1g013150  | side hydrolase family 18 protein     | AM+K_not_in_group |
| Medtr1g013700  | CBL-interacting kinase               | AM+K_not_in_group |
| Medtr1g014070  | responsive NPH3 family protein       | AM+K_not_in_group |

## diffusion\_prioritization\_ALL

|               |                                      |                   |
|---------------|--------------------------------------|-------------------|
| Medtr1g015110 | phosphatase 2C family protein        | AM+K_not_in_group |
| Medtr1g015750 | g protein alpha subunit, putative    | AM+K_not_in_group |
| Medtr1g015830 | ine decarboxylase family protein     | AM+K_not_in_group |
| Medtr1g017400 | e-responsive transcription factor    | AM+K_not_in_group |
| Medtr1g018910 | ase, plant-type protein, putative    | AM+K_not_in_group |
| Medtr1g019790 | hypothetical protein                 | AM+K_not_in_group |
| Medtr1g021845 | rsM-domain receptor-like kinase      | AM+K_not_in_group |
| Medtr1g022265 | ceptor-like kinase family protein    | AM+K_not_in_group |
| Medtr1g022410 | roteasome subunit alpha type 1       | AM+K_not_in_group |
| Medtr1g022475 | hosphate 2-kinase-like protein       | AM+K_not_in_group |
| Medtr1g024025 | auxin response factor 2              | AM+K_not_in_group |
| Medtr1g025550 | g (CaLB domain) family protein       | AM+K_not_in_group |
| Medtr1g026560 | coprotein family protein, putative   | AM+K_not_in_group |
| Medtr1g030850 | hypothetical protein                 | AM+K_not_in_group |
| Medtr1g031400 | tyrosine kinase family protein       | AM+K_not_in_group |
| Medtr1g031510 | ress-induced receptor-like kinase    | AM+K_not_in_group |
| Medtr1g032500 | ylation specificity factor, putative | AM+K_not_in_group |
| Medtr1g037460 | r OF AG-4-like protein, putative     | AM+K_not_in_group |
| Medtr1g044135 | plant/T32M21-140 protein             | AM+K_not_in_group |
| Medtr1g050432 | lipoyl synthase                      | AM+K_not_in_group |
| Medtr1g050520 | e and PP2C-like domain protein       | AM+K_not_in_group |
| Medtr1g050760 | S1/YhbY (CRM) domain protein         | AM+K_not_in_group |
| Medtr1g052065 | hypothetical protein                 | AM+K_not_in_group |
| Medtr1g052115 | eonine-kinase Nek7-like protein      | AM+K_not_in_group |
| Medtr1g052530 | lin-domain kinase CDPK protein       | AM+K_not_in_group |
| Medtr1g054675 | RNA recognition motif                | AM+K_not_in_group |
| Medtr1g055300 | n assembly co-chaperone HscB         | AM+K_not_in_group |
| Medtr1g056470 | differentiation RCD1-like protein    | AM+K_not_in_group |
| Medtr1g060990 | trihelix transcription factor        | AM+K_not_in_group |
| Medtr1g061970 | ndent RNA helicase-like protein      | AM+K_not_in_group |
| Medtr1g064710 | RING/U-box protein                   | AM+K_not_in_group |
| Medtr1g066970 | IP motif) family protein, putative   | AM+K_not_in_group |
| Medtr1g069165 | CLIP-associated protein              | AM+K_not_in_group |
| Medtr1g069190 | DUF3741 family protein               | AM+K_not_in_group |
| Medtr1g069825 | G1-like protein                      | AM+K_not_in_group |
| Medtr1g069925 | modification MEAF6-like protein      | AM+K_not_in_group |
| Medtr1g070830 | ponsive AUX/IAA family protein       | AM+K_not_in_group |
| Medtr1g071370 | phosphatase 2C family protein        | AM+K_not_in_group |
| Medtr1g073930 | hypothetical protein                 | AM+K_not_in_group |
| Medtr1g075480 | TPR 7B-like protein                  | AM+K_not_in_group |
| Medtr1g075870 | casein kinase I-like protein         | AM+K_not_in_group |
| Medtr1g075990 | DUF640 family protein                | AM+K_not_in_group |
| Medtr1g076130 | emic-like malate dehydrogenase       | AM+K_not_in_group |
| Medtr1g077040 | methyltransferase family protein     | AM+K_not_in_group |
| Medtr1g077850 | Hop-interacting protein THI002       | AM+K_not_in_group |
| Medtr1g078090 | letoxification superfamily protein   | AM+K_not_in_group |
| Medtr1g080340 | ltransferase SUVR2-like protein      | AM+K_not_in_group |
| Medtr1g080990 | MtN26                                | AM+K_in_group     |
| Medtr1g081330 | WNK kinase                           | AM+K_not_in_group |
| Medtr1g082730 | Hus1 checkpoint protein              | AM+K_not_in_group |
| Medtr1g082840 | nucleolar GTPase, putative           | AM+K_not_in_group |

diffusion\_prioritization\_ALL

|               |                                     |                   |
|---------------|-------------------------------------|-------------------|
| Medtr1g084230 | hypothetical protein                | AM+K_not_in_group |
| Medtr1g084760 | glycogen synthase kinase            | AM+K_not_in_group |
| Medtr1g085160 | phytochrome protein A               | AM+K_not_in_group |
| Medtr1g086500 | PR containing plant-like protein    | AM+K_not_in_group |
| Medtr1g087290 | ication regulator dpb11, putative   | AM+K_not_in_group |
| Medtr1g087310 | Cdc2 kinase, putative               | AM+K_not_in_group |
| Medtr1g090670 | ranscription factor family protein  | AM+K_not_in_group |
| Medtr1g090917 | sphoinositide-dependent kinase      | AM+K_not_in_group |
| Medtr1g093350 | auxin response factor               | AM+K_not_in_group |
| Medtr1g094730 | /Threonine kinase family protein    | AM+K_not_in_group |
| Medtr1g096790 | isomerase-like protein, putative    | AM+K_not_in_group |
| Medtr1g099440 | e regulator-like protein, putative  | AM+K_not_in_group |
| Medtr1g099590 | icopeptide (PPR) repeat protein     | AM+K_not_in_group |
| Medtr1g101330 | calmodulin-binding protein          | AM+K_not_in_group |
| Medtr1g101910 | DUF4378 domain protein              | AM+K_not_in_group |
| Medtr1g102420 | embryo-specific protein             | AM+K_not_in_group |
| Medtr1g102500 | ceptor-like kinase family protein   | AM+K_not_in_group |
| Medtr1g102550 | ATP sulfurylase                     | AM+K_not_in_group |
| Medtr1g103550 | DUF1677 family protein              | AM+K_not_in_group |
| Medtr1g105595 | -rich receptor-kinase-like protein  | AM+K_not_in_group |
| Medtr1g105655 | -rich receptor-kinase-like protein  | AM+K_not_in_group |
| Medtr1g105890 | ransmembrane protein, putative      | AM+K_not_in_group |
| Medtr1g106785 | ryogenesis receptor-like kinase     | AM+K_not_in_group |
| Medtr1g106855 | 1 phosphatase 2C family protein     | AM+K_not_in_group |
| Medtr1g107380 | ucosyltransferase family protein    | AM+K_not_in_group |
| Medtr1g109580 | LRR receptor-like kinase            | AM+K_not_in_group |
| Medtr1g111020 | icopeptide (PPR) repeat protein     | AM+K_not_in_group |
| Medtr1g116040 | -rich group669 secreted peptide     | AM+K_not_in_group |
| Medtr1g116520 | Pti1-like kinase                    | AM+K_not_in_group |
| Medtr2g005290 | MAP kinase kinase kinase            | AM+K_not_in_group |
| Medtr2g005810 | ceptor-like kinase family protein   | AM+K_not_in_group |
| Medtr2g008230 | s3-like protein (other strand read) | AM+K_not_in_group |
| Medtr2g008390 | embryogenesis receptor kinase       | AM+K_not_in_group |
| Medtr2g008440 | ase oxidase/kelch repeat protein    | AM+K_not_in_group |
| Medtr2g010180 | cid amide hydrolase-like protein    | AM+K_not_in_group |
| Medtr2g010300 | cytochrome P450 family protein      | AM+K_not_in_group |
| Medtr2g010470 | ceptor-like kinase family protein   | AM+K_not_in_group |
| Medtr2g013210 | receptor-like kinase                | AM+K_not_in_group |
| Medtr2g013720 | lectin receptor kinase              | AM+K_not_in_group |
| Medtr2g016030 | Dof domain zinc finger protein      | AM+K_not_in_group |
| Medtr2g016490 | shaggy-like kinase dzeta            | AM+K_not_in_group |
| Medtr2g019230 | kelch repeat F-box protein          | AM+K_not_in_group |
| Medtr2g019260 | ubiquitin-protein ligase, cullin 4  | AM+K_not_in_group |
| Medtr2g023320 | soluble starch synthase III-1       | AM+K_not_in_group |
| Medtr2g024330 | trubbelig-receptor family protein   | AM+K_not_in_group |
| Medtr2g027690 | of mRNA-decapping-like protein      | AM+K_not_in_group |
| Medtr2g028940 | 1 ligase LIN-like protein, putative | AM+K_not_in_group |
| Medtr2g029560 | peroxidase family protein           | AM+K_not_in_group |
| Medtr2g029860 | peroxidase family protein           | AM+K_not_in_group |
| Medtr2g037830 | ellulose synthase-like protein D3   | AM+K_not_in_group |
| Medtr2g041170 | brevis radix-like protein           | AM+K_not_in_group |

## diffusion\_prioritization\_ALL

|                                                    |                   |
|----------------------------------------------------|-------------------|
| Medtr2g042440 y ATP-dependent DNA helicase         | AM+K_not_in_group |
| Medtr2g046130 receptor-like kinase plant           | AM+K_not_in_group |
| Medtr2g048390 -responsive NPH3 family protein      | AM+K_not_in_group |
| Medtr2g059200 ily protein/WD-40 repeat protein     | AM+K_not_in_group |
| Medtr2g065470 de-3-phosphate dehydrogenase         | AM+K_not_in_group |
| Medtr2g067220 al retardation-interacting protein   | AM+K_not_in_group |
| Medtr2g067440 peroxidase family protein            | AM+K_not_in_group |
| Medtr2g069060 xygenase family oxidoreductase       | AM+K_not_in_group |
| Medtr2g073240 mnose biosynthetic-like enzyme       | AM+K_not_in_group |
| Medtr2g076960 general regulatory factor 2          | AM+K_not_in_group |
| Medtr2g078810 LRR receptor-like kinase             | AM+K_not_in_group |
| Medtr2g079800 synapsis 1-like protein, putative    | AM+K_not_in_group |
| Medtr2g081300 :alcium-binding EF-hand protein      | AM+K_not_in_group |
| Medtr2g081520 ocus lectin kinase family protein    | AM+K_not_in_group |
| Medtr2g081630 ear transcription factor Y protein   | AM+K_not_in_group |
| Medtr2g082430 specificity kinase domain protein    | AM+K_not_in_group |
| Medtr2g082570 kinesin motor domain protein         | AM+K_not_in_group |
| Medtr2g084000 lignin biosynthetic peroxidase       | AM+K_not_in_group |
| Medtr2g085200 cyclin-dependent kinase              | AM+K_not_in_group |
| Medtr2g086560 :alcium-binding EF-hand protein      | AM+K_not_in_group |
| Medtr2g087960 ellulose synthase H1-like protein    | AM+K_not_in_group |
| Medtr2g088590 hypothetical protein                 | AM+K_not_in_group |
| Medtr2g089350 universal stress family protein      | AM+K_not_in_group |
| Medtr2g090120 :trubbelig receptor family protein   | AM+K_not_in_group |
| Medtr2g091185 inding coat-associated protein 1     | AM+K_not_in_group |
| Medtr2g093180 nitrate excretion transporter 1      | AM+K_not_in_group |
| Medtr2g093430 cystatin domain protein              | AM+K_not_in_group |
| Medtr2g094090 /Threonine kinase family protein     | AM+K_not_in_group |
| Medtr2g095980 phototropin-2 protein                | AM+K_not_in_group |
| Medtr2g096010 te hydrolase superfamily protein     | AM+K_not_in_group |
| Medtr2g096370 ATP synthase 6 kDa subunit           | AM+K_not_in_group |
| Medtr2g100060 nesis abundant protein, putative     | AM+K_not_in_group |
| Medtr2g101310 ankyrin repeat plant-like protein    | AM+K_not_in_group |
| Medtr2g103840 LURP-one-like protein                | AM+K_not_in_group |
| Medtr2g104100 idopyrimidine-DNA glycosylase        | AM+K_not_in_group |
| Medtr2g104490 elix DNA-binding domain protein      | AM+K_not_in_group |
| Medtr2g104760 F-box/LRR protein                    | AM+K_not_in_group |
| Medtr2g105260 receptor-like kinase                 | AM+K_not_in_group |
| Medtr2g105930 na hydrolase-like domain kinase      | AM+K_not_in_group |
| Medtr2g436710 n ABC transporter family protein     | AM+K_not_in_group |
| Medtr2g437730 ceptor-like kinase family protein    | AM+K_not_in_group |
| Medtr2g450740 idase II beta subunit-like protein   | AM+K_not_in_group |
| Medtr3g005560 ellulose synthase-like protein D3    | AM+K_not_in_group |
| Medtr3g007650 ocus lectin kinase family protein    | AM+K_in_group     |
| Medtr3g008270 U-box kinase family protein          | AM+K_not_in_group |
| Medtr3g008280 U-box kinase family protein          | AM+K_not_in_group |
| Medtr3g008840 e/ppectin methylesterase inhibitor   | AM+K_not_in_group |
| Medtr3g009400 ceptor-like kinase family protein    | AM+K_not_in_group |
| Medtr3g014220 hypothetical protein                 | AM+K_not_in_group |
| Medtr3g016200 _stein, putative (other strand read) | AM+K_not_in_group |
| Medtr3g018640 differentiation RCD1-like protein    | AM+K_not_in_group |

## diffusion\_prioritization\_ALL

|                 |                                    |                   |
|-----------------|------------------------------------|-------------------|
| Medtr3g019530   | ocus lectin kinase family protein  | AM+K_not_in_group |
| Medtr3g022230   | ase resistance protein, putative   | AM+K_not_in_group |
| Medtr3g023180   | PR containing plant-like protein   | AM+K_not_in_group |
| Medtr3g027772   | ransmembrane protein, putative     | AM+K_not_in_group |
| Medtr3g028010   | omain stress-associated protein    | AM+K_not_in_group |
| Medtr3g030890   | tRNA-dihydrouridine synthase       | AM+K_not_in_group |
| Medtr3g032370   | main disease resistance protein    | AM+K_not_in_group |
| Medtr3g034300   | ed organelles complex-1 protein    | AM+K_not_in_group |
| Medtr3g034670   | alpha/beta fold hydrolase          | AM+K_not_in_group |
| Medtr3g058630   | tal ion transporter family protein | AM+K_in_group     |
| Medtr3g058970   | carboxy-terminal domain protein    | AM+K_not_in_group |
| Medtr3g061030   | sphoribulokinase/uridine kinase    | AM+K_not_in_group |
| Medtr3g062590   | LRR receptor-like kinase           | AM+K_not_in_group |
| Medtr3g064390   | nall GTPase family RAB protein     | AM+K_not_in_group |
| Medtr3g064510   | expansin A1                        | AM+K_not_in_group |
| Medtr3g067585   | rg (CaLB domain) family protein    | AM+K_not_in_group |
| Medtr3g067610   | id calcium-binding family protein  | AM+K_not_in_group |
| Medtr3g067650   | /Threonine kinase family protein   | AM+K_not_in_group |
| Medtr3g067770   | kinase 1B                          | AM+K_not_in_group |
| Medtr3g067795   | tyrosine kinase family protein     | AM+K_not_in_group |
| Medtr3g068155   | )-binding rossmann-fold protein    | AM+K_not_in_group |
| Medtr3g068990   | thyltransferase PMT16, putative    | AM+K_not_in_group |
| Medtr3g074860   | hate-responsive 1 family protein   | AM+K_not_in_group |
| Medtr3g076630   | dehydrogenase E1 beta subunit      | AM+K_not_in_group |
| Medtr3g077860   | xtasia mutated protein, putative   | AM+K_not_in_group |
| Medtr3g078580   | PR containing plant-like protein   | AM+K_not_in_group |
| Medtr3g083130   | eductase family oxidoreductase     | AM+K_not_in_group |
| Medtr3g083370   | propene-1-carboxylate oxidase      | AM+K_not_in_group |
| Medtr3g083540   | myb transcription factor           | AM+K_not_in_group |
| Medtr3g084300   | DNA repair protein RAD50           | AM+K_not_in_group |
| Medtr3g085160   | F-box only-like protein            | AM+K_not_in_group |
| Medtr3g086010   | gulatory B subunit family protein  | AM+K_not_in_group |
| Medtr3g086150   | P41-interacting protein, putative  | AM+K_not_in_group |
| Medtr3g086550   | 313030) TAIR;Acc:AT1G13030]        | AM+K_not_in_group |
| Medtr3g086630   | 4-type RING zinc finger protein    | AM+K_not_in_group |
| Medtr3g088520   | beta-like galactosidase            | AM+K_not_in_group |
| Medtr3g088630   | inse regulator ARR3-like protein   | AM+K_not_in_group |
| Medtr3g089020   | bolising metallo-beta-lactamase    | AM+K_not_in_group |
| Medtr3g089140   | atin remodeling complex subunit    | AM+K_not_in_group |
| Medtr3g090600   | alactosyltransferase-like protein  | AM+K_not_in_group |
| Medtr3g090660   | LRR receptor-like kinase           | AM+K_not_in_group |
| Medtr3g091080   | le-gated ion channel-like protein  | AM+K_not_in_group |
| Medtr3g091440   | calcineurin B-like protein 4-1     | AM+K_not_in_group |
| Medtr3g091760   | ABIL1-like protein                 | AM+K_not_in_group |
| Medtr3g092640   | ne-related protein CP5, putative   | AM+K_not_in_group |
| Medtr3g093260   | hypothetical protein               | AM+K_not_in_group |
| Medtr3g093930   | ceptor-like kinase family protein  | AM+K_not_in_group |
| Medtr3g094020   | bZIP transcription factor          | AM+K_not_in_group |
| Medtr3g095190   | omain class transcription factor   | AM+K_not_in_group |
| Medtr3g095620   | dependent kinase family protein    | AM+K_not_in_group |
| Medtr3g095620_s | amily protein (other strand read)  | AM+K_not_in_group |

diffusion\_prioritization\_ALL

|               |                                      |                   |
|---------------|--------------------------------------|-------------------|
| Medtr3g096160 | BTB/POZ domain plant protein         | AM+K_not_in_group |
| Medtr3g098490 | ring glycosyl group transferase      | AM+K_not_in_group |
| Medtr3g099030 | metal-associated domain protein      | AM+K_not_in_group |
| Medtr3g099220 | hypothetical protein                 | AM+K_not_in_group |
| Medtr3g100310 | ase protein O-fucosyltransferase     | AM+K_not_in_group |
| Medtr3g102020 | acyl-transferase family protein      | AM+K_not_in_group |
| Medtr3g102810 | subtilisin-like serine protease      | AM+K_not_in_group |
| Medtr3g103510 | squalene epoxidase                   | AM+K_not_in_group |
| Medtr3g104730 | protein phosphatase 2C               | AM+K_not_in_group |
| Medtr3g106060 | NRKY family transcription factor     | AM+K_not_in_group |
| Medtr3g106100 | ic acid-binding protein, putative    | AM+K_not_in_group |
| Medtr3g106140 | /beta-catenin-like repeat protein    | AM+K_not_in_group |
| Medtr3g106585 | Kunitz type trypsin inhibitor        | AM+K_not_in_group |
| Medtr3g107070 | Serine/Threonine-kinase SD2-5        | AM+K_not_in_group |
| Medtr3g107930 | alpha-galacturonosyltransferase      | AM+K_not_in_group |
| Medtr3g109870 | ha/beta hydrolase family protein     | AM+K_not_in_group |
| Medtr3g109950 | porter TauE/SafE family protein      | AM+K_not_in_group |
| Medtr3g110450 | ceptor-like kinase family protein    | AM+K_not_in_group |
| Medtr3g110530 | ta-hydrolase superfamily protein     | AM+K_not_in_group |
| Medtr3g111670 | unit SAP30 Sin3-binding protein      | AM+K_not_in_group |
| Medtr3g111880 | MYB family transcription factor      | AM+K_not_in_group |
| Medtr3g113010 | hypothetical protein                 | AM+K_not_in_group |
| Medtr3g114480 | on-ATPase regulatory subunit 3       | AM+K_not_in_group |
| Medtr3g115040 | hydratase 2, peroxisomal protein     | AM+K_not_in_group |
| Medtr3g115400 | egulator RWP-RK family protein       | AM+K_not_in_group |
| Medtr3g117390 | FMP32-like protein                   | AM+K_not_in_group |
| Medtr3g118150 | e chaperone ASF1B-like protein       | AM+K_not_in_group |
| Medtr3g449200 | hypothetical protein                 | AM+K_not_in_group |
| Medtr3g462790 | MYB transcription factor MYB51       | AM+K_not_in_group |
| Medtr3g462960 | s etical protein (other strand read) | AM+K_not_in_group |
| Medtr3g464770 | se/fructose-2, 6-bisphosphatase      | AM+K_not_in_group |
| Medtr4g005130 | bbelig-receptor family 6 protein     | AM+K_not_in_group |
| Medtr4g005730 | TE family kinase domain protein      | AM+K_not_in_group |
| Medtr4g007540 | te hydroxycinnamoyltransferase       | AM+K_not_in_group |
| Medtr4g007970 | s epeat protein (other strand read)  | AM+K_not_in_group |
| Medtr4g014480 | ation-transporting ATPase plant      | AM+K_not_in_group |
| Medtr4g019690 | plant/T7H20-70 protein               | AM+K_not_in_group |
| Medtr4g021725 | metallothionein                      | AM+K_in_group     |
| Medtr4g022350 | e/steroid-binding domain protein     | AM+K_not_in_group |
| Medtr4g023000 | oside hydrolase family 1 protein     | AM+K_not_in_group |
| Medtr4g023560 | nt DNA helicase 2 subunit Ku80       | AM+K_not_in_group |
| Medtr4g025850 | SNAP receptor complex protein        | AM+K_not_in_group |
| Medtr4g026450 | inone biosynthesis protein UbiB      | AM+K_not_in_group |
| Medtr4g029620 | extensin-like repeat protein         | AM+K_not_in_group |
| Medtr4g030910 | RM repeat kinase family protein      | AM+K_not_in_group |
| Medtr4g031800 | flavonoid glucosyltransferase        | AM+K_not_in_group |
| Medtr4g035170 | adenylate kinase                     | AM+K_not_in_group |
| Medtr4g035550 | PHD finger plant-like protein        | AM+K_not_in_group |
| Medtr4g038330 | hypothetical protein                 | AM+K_not_in_group |
| Medtr4g045577 | protein transporter Sec31            | AM+K_not_in_group |
| Medtr4g046723 | ethyltransferase domain protein      | AM+K_not_in_group |

diffusion\_prioritization\_ALL

|               |                                      |                   |
|---------------|--------------------------------------|-------------------|
| Medtr4g048000 | MATE efflux family protein           | AM+K_not_in_group |
| Medtr4g050180 | replication factor C1                | AM+K_not_in_group |
| Medtr4g050190 | tosidine synthase family protein     | AM+K_not_in_group |
| Medtr4g057565 | sorting-associated-like protein      | AM+K_not_in_group |
| Medtr4g061320 | MAP kinase                           | AM+K_not_in_group |
| Medtr4g065080 | Threonine kinase family protein      | AM+K_not_in_group |
| Medtr4g068110 | dehydrogenase/decarboxylase          | AM+K_not_in_group |
| Medtr4g068950 | demethyltransferase, putative        | AM+K_not_in_group |
| Medtr4g069960 | nylyl cyclase-associated protein     | AM+K_not_in_group |
| Medtr4g070080 | (RBD/RNP motif) family protein       | AM+K_not_in_group |
| Medtr4g070860 | ZIP transcription factor bZIP124     | AM+K_not_in_group |
| Medtr4g074120 | DUF3755 family protein               | AM+K_not_in_group |
| Medtr4g075200 | midA                                 | AM+K_not_in_group |
| Medtr4g076020 | GRAS family transcription factor     | AM+K_not_in_group |
| Medtr4g079390 | transcription factor 3C-like protein | AM+K_not_in_group |
| Medtr4g080030 | kinase kinase kinase-like protein    | AM+K_not_in_group |
| Medtr4g080050 | DUF688 family protein                | AM+K_not_in_group |
| Medtr4g080110 | (G42700) TAIR;Acc:AT2G42700]         | AM+K_not_in_group |
| Medtr4g081010 | polyubiquitin 3                      | AM+K_not_in_group |
| Medtr4g081410 | formin-like 2 domain protein         | AM+K_not_in_group |
| Medtr4g082325 | specificity kinase splA-like protein | AM+K_not_in_group |
| Medtr4g084280 | g (CaLB domain) family protein       | AM+K_not_in_group |
| Medtr4g084750 | associated leucine zipper protein    | AM+K_not_in_group |
| Medtr4g086250 | ase, plant-type protein, putative    | AM+K_not_in_group |
| Medtr4g086660 | lin-domain kinase CDPK protein       | AM+K_not_in_group |
| Medtr4g089155 | re carboxypeptidase-like protein     | AM+K_not_in_group |
| Medtr4g090580 | NAD(P)H dehydrogenase B2             | AM+K_not_in_group |
| Medtr4g091420 | ransmembrane protein, putative       | AM+K_not_in_group |
| Medtr4g091670 | tor-like Serine/Threonine-kinase     | AM+K_not_in_group |
| Medtr4g093080 | receptor lectin kinase               | AM+K_not_in_group |
| Medtr4g093250 | ss I glutamine amidotransferase      | AM+K_not_in_group |
| Medtr4g093860 | ransmembrane protein, putative       | AM+K_not_in_group |
| Medtr4g093870 | 5-oxoprolinase                       | AM+K_not_in_group |
| Medtr4g094208 | ein phosphatase 2C-like protein      | AM+K_not_in_group |
| Medtr4g094222 | ubiquinol oxidase 1a                 | AM+K_not_in_group |
| Medtr4g094375 | plant/F1M20-13 protein               | AM+K_not_in_group |
| Medtr4g094405 | Sec1-family transporter              | AM+K_not_in_group |
| Medtr4g094430 | cyclin-dependent kinase              | AM+K_not_in_group |
| Medtr4g094435 | lygalacturonase inhibitor protein    | AM+K_not_in_group |
| Medtr4g094440 | lygalacturonase inhibitor protein    | AM+K_not_in_group |
| Medtr4g094572 | re-dependent methyltransferase       | AM+K_not_in_group |
| Medtr4g094905 | drouridine synthase-like protein     | AM+K_not_in_group |
| Medtr4g094982 | myb transcription factor             | AM+K_not_in_group |
| Medtr4g095500 | GRAS family transcription factor     | AM+K_not_in_group |
| Medtr4g095670 | ase II subunit alpha-like protein    | AM+K_not_in_group |
| Medtr4g097790 | ransmembrane protein, putative       | AM+K_not_in_group |
| Medtr4g098530 | ar ras group-related LRR protein     | AM+K_not_in_group |
| Medtr4g098890 | ase PMT14-like protein, putative     | AM+K_not_in_group |
| Medtr4g099130 | receptor-like kinase plant           | AM+K_not_in_group |
| Medtr4g099220 | menting 1(SNF1)-related kinase       | AM+K_not_in_group |
| Medtr4g101990 | notif DNA-binding family protein     | AM+K_not_in_group |



## diffusion\_prioritization\_ALL

|                   |                                     |                   |
|-------------------|-------------------------------------|-------------------|
| Medtr4g103810     | cyclin-dependent kinase             | AM+K_not_in_group |
| Medtr4g105490     | synaptobrevin-like protein          | AM+K_not_in_group |
| Medtr4g106590     | inse regulator ARR3-like protein    | AM+K_not_in_group |
| Medtr4g106940     | ASP ARALYDRAFT-like protein         | AM+K_not_in_group |
| Medtr4g107200     | hypothetical protein                | AM+K_not_in_group |
| Medtr4g109230     | zinc finger protein, putative       | AM+K_not_in_group |
| Medtr4g109480     | ransmembrane protein, putative      | AM+K_not_in_group |
| Medtr4g109500     | deacetylase superfamily protein     | AM+K_not_in_group |
| Medtr4g112350     | kinesin motor domain protein        | AM+K_not_in_group |
| Medtr4g113790     | /Threonine kinase family protein    | AM+K_not_in_group |
| Medtr4g114240     | S-receptor kinase-like protein      | AM+K_not_in_group |
| Medtr4g114250     | ocus lectin kinase family protein   | AM+K_in_group     |
| Medtr4g114610_s l | protein L36 (other strand read)     | AM+K_not_in_group |
| Medtr4g114670     | CBL-interacting kinase              | AM+K_not_in_group |
| Medtr4g115170     | id calcium-binding family protein   | AM+K_not_in_group |
| Medtr4g115660     | rg (CaLB domain) family protein     | AM+K_not_in_group |
| Medtr4g116273_s   | etical protein (other strand read)  | AM+K_not_in_group |
| Medtr4g116360     | hypothetical protein                | AM+K_not_in_group |
| Medtr4g116360_s   | etical protein (other strand read)  | AM+K_not_in_group |
| Medtr4g120730     | ycoside hydrolase family protein    | AM+K_not_in_group |
| Medtr4g123110     | pendent lipid-binding-like protein  | AM+K_not_in_group |
| Medtr4g123880     | receptor-like kinase plant          | AM+K_not_in_group |
| Medtr4g123930     | activated RelA/SpoT-like protein    | AM+K_not_in_group |
| Medtr4g124950     | jasmonate zim-domain protein        | AM+K_not_in_group |
| Medtr4g125800     | MAP kinase kinase                   | AM+K_not_in_group |
| Medtr4g126910     | EndA/NucM family nuclease           | AM+K_not_in_group |
| Medtr4g126950     | -like acyl-esterase family protein  | AM+K_not_in_group |
| Medtr4g126970     | /Threonine kinase family protein    | AM+K_not_in_group |
| Medtr4g127490     | inding protein)-related protein 4C  | AM+K_not_in_group |
| Medtr4g127630     | metaxin-like protein, putative      | AM+K_not_in_group |
| Medtr4g128340     | zinc finger protein                 | AM+K_not_in_group |
| Medtr4g128670     | myb transcription factor            | AM+K_not_in_group |
| Medtr4g129070     | ylglycerol kinase domain protein    | AM+K_not_in_group |
| Medtr4g130190     | .TG18) protein B, related protein   | AM+K_not_in_group |
| Medtr4g132070     | lin-domain kinase CDPK protein      | AM+K_not_in_group |
| Medtr5g004720     | combination RAD54-like protein      | AM+K_not_in_group |
| Medtr5g006820     | hosphate 5-phosphatase CVP2         | AM+K_not_in_group |
| Medtr5g007360     | elease 2, NERD domain protein       | AM+K_not_in_group |
| Medtr5g009750     | in transporter USO1-like protein    | AM+K_not_in_group |
| Medtr5g009830     | lin-domain kinase CDPK protein      | AM+K_not_in_group |
| Medtr5g010160     | DUF3527 domain protein              | AM+K_not_in_group |
| Medtr5g011540     | MATE efflux family protein          | AM+K_not_in_group |
| Medtr5g013230     | glycerolipase A1                    | AM+K_not_in_group |
| Medtr5g013370     | \ transcription factor-like protein | AM+K_not_in_group |
| Medtr5g013610     | receptor-like kinase plant          | AM+K_not_in_group |
| Medtr5g014700     | :ceptor-like kinase family protein  | AM+K_not_in_group |
| Medtr5g015050     | :ceptor-like kinase family protein  | AM+K_not_in_group |
| Medtr5g015280     | ransmembrane protein, putative      | AM+K_not_in_group |
| Medtr5g015720     | oxsyl hydrolase family 17 protein   | AM+K_not_in_group |
| Medtr5g015830     | ase II subunit alpha-like protein   | AM+K_not_in_group |
| Medtr5g016570     | UPF0481 plant-like protein          | AM+K_not_in_group |

diffusion\_prioritization\_ALL

|               |                                      |                   |
|---------------|--------------------------------------|-------------------|
| Medtr5g017040 | elix DNA-binding domain protein      | AM+K_not_in_group |
| Medtr5g017080 | receptor-like kinase plant           | AM+K_not_in_group |
| Medtr5g017140 | MAP kinase kinase kinase             | AM+K_not_in_group |
| Medtr5g019500 | ransmembrane protein, putative       | AM+K_not_in_group |
| Medtr5g020465 | s etical protein (other strand read) | AM+K_not_in_group |
| Medtr5g021270 | MADS-box transcription factor        | AM+K_not_in_group |
| Medtr5g023810 | ltransferase/poly(A) polymerase      | AM+K_not_in_group |
| Medtr5g024270 | /Threonine kinase family protein     | AM+K_not_in_group |
| Medtr5g024740 | st monosaccharide transporter 2      | AM+K_not_in_group |
| Medtr5g026510 | LRR receptor-like kinase             | AM+K_not_in_group |
| Medtr5g028930 | ankyrin repeat protein               | AM+K_not_in_group |
| Medtr5g029230 | ol acyltransferase family protein    | AM+K_not_in_group |
| Medtr5g029370 | tion factor jumonji family protein   | AM+K_not_in_group |
| Medtr5g032910 | ir ras-group-related LRR protein     | AM+K_not_in_group |
| Medtr5g033170 | oxidase, enzyme domain protein       | AM+K_not_in_group |
| Medtr5g033590 | ta-hydrolase superfamily protein     | AM+K_not_in_group |
| Medtr5g034750 | NHL repeat protein                   | AM+K_not_in_group |
| Medtr5g035080 | -like acyl-esterase family protein   | AM+K_not_in_group |
| Medtr5g037410 | tyrosine kinase family protein       | AM+K_not_in_group |
| Medtr5g037540 | actin cross-linking protein          | AM+K_not_in_group |
| Medtr5g038580 | PR containing plant-like protein     | AM+K_not_in_group |
| Medtr5g038870 | /Threonine kinase family protein     | AM+K_not_in_group |
| Medtr5g040770 | . type disease resistance protein    | AM+K_not_in_group |
| Medtr5g043850 | :-sensitive factor adaptor protein   | AM+K_not_in_group |
| Medtr5g045910 | ceptor-like kinase family protein    | AM+K_not_in_group |
| Medtr5g055070 | ocus lectin kinase family protein    | AM+K_not_in_group |
| Medtr5g055470 | LRR receptor-like kinase             | AM+K_not_in_group |
| Medtr5g058090 | inase plant-like protein, putative   | AM+K_not_in_group |
| Medtr5g061860 | exchanger and transporter sat-1      | AM+K_not_in_group |
| Medtr5g065580 | ydrofolate reductase-like protein    | AM+K_not_in_group |
| Medtr5g066440 | alization insensitive-like protein   | AM+K_not_in_group |
| Medtr5g067240 | glycerate mutase family protein      | AM+K_not_in_group |
| Medtr5g068060 | DUF3133 family protein               | AM+K_not_in_group |
| Medtr5g071540 | 1/RBD/RNP motif) family protein      | AM+K_not_in_group |
| Medtr5g075060 | CBL-interacting kinase               | AM+K_not_in_group |
| Medtr5g075220 | WNK kinase                           | AM+K_not_in_group |
| Medtr5g077430 | LRR receptor-like kinase             | AM+K_not_in_group |
| Medtr5g079340 | id calcium-binding family protein    | AM+K_not_in_group |
| Medtr5g079840 | kinase 1B                            | AM+K_not_in_group |
| Medtr5g081460 | hypothetical protein                 | AM+K_not_in_group |
| Medtr5g081910 | somal membrane carrier protein       | AM+K_not_in_group |
| Medtr5g083750 | .soluble NSF attachment protein      | AM+K_not_in_group |
| Medtr5g084810 | termination factor family protein    | AM+K_not_in_group |
| Medtr5g085350 | ankyrin repeat protein               | AM+K_not_in_group |
| Medtr5g085900 | main protein/ML domain protein       | AM+K_not_in_group |
| Medtr5g087780 | ceptor-like kinase family protein    | AM+K_not_in_group |
| Medtr5g087790 | ie insensitive transcription factor  | AM+K_not_in_group |
| Medtr5g087840 | esis receptor kinase-like protein    | AM+K_not_in_group |
| Medtr5g089750 | ot primordium (LRP)-like protein     | AM+K_not_in_group |
| Medtr5g089750 | s )-like protein (other strand read) | AM+K_not_in_group |
| Medtr5g090100 | LRR receptor-like kinase             | AM+K_not_in_group |

## diffusion\_prioritization\_ALL

|                                                   |                   |
|---------------------------------------------------|-------------------|
| Medtr5g091390 WRKY family transcription factor    | AM+K_not_in_group |
| Medtr5g091640 ³PR containing plant-like protein   | AM+K_not_in_group |
| Medtr5g091950 LRR receptor-like kinase            | AM+K_not_in_group |
| Medtr5g094250 pirin-like plant protein            | AM+K_not_in_group |
| Medtr5g094770 ³PR containing plant-like protein   | AM+K_not_in_group |
| Medtr5g095690 icopeptide (PPR) repeat protein     | AM+K_not_in_group |
| Medtr5g096030 g protein 4 (RIN4) family protein   | AM+K_not_in_group |
| Medtr5g097530 nine-kinase WNK11-like protein      | AM+K_not_in_group |
| Medtr5g097580 1/RBD/RNP motif) family protein     | AM+K_not_in_group |
| Medtr5g099130 /Threonine kinase family protein    | AM+K_not_in_group |
| Medtr6g004200 2-hydroxyacyl-CoA lyase             | AM+K_not_in_group |
| Medtr6g006770 /Threonine kinase family protein    | AM+K_not_in_group |
| Medtr6g008690 ate transporter plant-like protein  | AM+K_not_in_group |
| Medtr6g011680 ABC transporter B family protein    | AM+K_not_in_group |
| Medtr6g012770 ³mp24/gp25L/p24 family protein      | AM+K_not_in_group |
| Medtr6g013395 hypothetical protein                | AM+K_not_in_group |
| Medtr6g016245 o acid transporter family protein   | AM+K_not_in_group |
| Medtr6g016310 ransmembrane protein, putative      | AM+K_not_in_group |
| Medtr6g017240 ranscriptional regulator, putative  | AM+K_not_in_group |
| Medtr6g022320 rine alpha-galactosyltransferase    | AM+K_not_in_group |
| Medtr6g026870 n/transmembrane family protein      | AM+K_not_in_group |
| Medtr6g028050 rg (CaLB domain) family protein     | AM+K_not_in_group |
| Medtr6g033130 main kinase superfamily protein     | AM+K_not_in_group |
| Medtr6g035185 ucosyltransferase family protein    | AM+K_not_in_group |
| Medtr6g035315 transcription factor                | AM+K_not_in_group |
| Medtr6g036450 rA-like transporter family protein  | AM+K_not_in_group |
| Medtr6g047750 GRAS family transcription factor    | AM+K_not_in_group |
| Medtr6g053660 -like zinc finger protein, putative | AM+K_not_in_group |
| Medtr6g055030 3HC4 type (RING finger) protein     | AM+K_not_in_group |
| Medtr6g060230 LRR receptor-like kinase            | AM+K_not_in_group |
| Medtr6g068930 ol dehydrogenase family protein     | AM+K_not_in_group |
| Medtr6g068970 ceptor-like kinase family protein   | AM+K_not_in_group |
| Medtr6g069030 LRR receptor-like kinase            | AM+K_not_in_group |
| Medtr6g072540 ³e protein (TIR-NBS-LRR class)      | AM+K_not_in_group |
| Medtr6g080470 cyclin-dependent kinase             | AM+K_not_in_group |
| Medtr6g081020 ³)-binding rossmann-fold protein    | AM+K_not_in_group |
| Medtr6g083240 plastocyanin-like domain protein    | AM+K_not_in_group |
| Medtr6g083940 \MSH-like ubiquitin thioesterase    | AM+K_not_in_group |
| Medtr6g083980 /Threonine kinase family protein    | AM+K_not_in_group |
| Medtr6g087070 casein kinase I-like protein        | AM+K_not_in_group |
| Medtr6g087670 :id beta-oxidation MFP-A protein    | AM+K_not_in_group |
| Medtr6g087920 cyclin-dependent kinase             | AM+K_not_in_group |
| Medtr6g090585 iotic nuclear division-like protein | AM+K_not_in_group |
| Medtr6g090605 inding protein of the ER protein    | AM+K_not_in_group |
| Medtr6g463630 tyrosine kinase family protein      | AM+K_not_in_group |
| Medtr7g006030 casein kinase I-like protein        | AM+K_not_in_group |
| Medtr7g011900 :affeic acid O-methyltransferase    | AM+K_not_in_group |
| Medtr7g013850 ramin 5-aromatic acyltransferase    | AM+K_not_in_group |
| Medtr7g017400 F-box/kelch-repeat plant protein    | AM+K_not_in_group |
| Medtr7g018090 ransmembrane protein, putative      | AM+K_not_in_group |
| Medtr7g018200 iP-interacting kinase-like protein  | AM+K_not_in_group |

diffusion\_prioritization\_ALL

|                                                     |                   |
|-----------------------------------------------------|-------------------|
| Medtr7g018290 nine decarboxylase proenzyme          | AM+K_not_in_group |
| Medtr7g023590 nase-inhibiting protein, putative     | AM+K_not_in_group |
| Medtr7g024520 oflavone-7-O-methyltransferase        | AM+K_not_in_group |
| Medtr7g056510 tor-like Serine/Threonine-kinase      | AM+K_not_in_group |
| Medtr7g059225 LRR receptor-like kinase              | AM+K_not_in_group |
| Medtr7g060460 /diphenol oxidase family protein      | AM+K_in_group     |
| Medtr7g061100 iated interaction domain protein      | AM+K_not_in_group |
| Medtr7g063580 eductase family oxidoreductase        | AM+K_not_in_group |
| Medtr7g064980 s carrier protein (other strand read) | AM+K_not_in_group |
| Medtr7g065880 DUF3527 domain protein                | AM+K_not_in_group |
| Medtr7g066690 uncoupling protein                    | AM+K_not_in_group |
| Medtr7g068710 lin-domain kinase CDPK protein        | AM+K_not_in_group |
| Medtr7g070510 ein phosphatase 2C-like protein       | AM+K_not_in_group |
| Medtr7g072070 s it-like protein (other strand read) | AM+K_not_in_group |
| Medtr7g073290 ceptor-like kinase family protein     | AM+K_not_in_group |
| Medtr7g073510 G38570) TAIR;Acc:AT2G38570]           | AM+K_not_in_group |
| Medtr7g073700 ise D chain-like protein, putative    | AM+K_not_in_group |
| Medtr7g074120 plant/F17O14-7 protein                | AM+K_not_in_group |
| Medtr7g074610 /Threonine kinase family protein      | AM+K_not_in_group |
| Medtr7g076220 /beta-catenin-like repeat protein     | AM+K_not_in_group |
| Medtr7g079860 icopeptide (PPR) repeat protein       | AM+K_not_in_group |
| Medtr7g080020 VRKY family transcription factor      | AM+K_not_in_group |
| Medtr7g080780 elix DNA-binding domain protein       | AM+K_not_in_group |
| Medtr7g080810 LRR receptor-like kinase              | AM+K_not_in_group |
| Medtr7g081480 ceptor-like kinase family protein     | AM+K_not_in_group |
| Medtr7g082300 LRR kinase family protein             | AM+K_not_in_group |
| Medtr7g082310 LRR receptor-like kinase              | AM+K_not_in_group |
| Medtr7g082650 AT repeat KIAA1468-like protein       | AM+K_not_in_group |
| Medtr7g084200 aminopeptidase                        | AM+K_not_in_group |
| Medtr7g084240 ransmembrane protein, putative        | AM+K_not_in_group |
| Medtr7g085020 flowering locus protein T             | AM+K_not_in_group |
| Medtr7g086460 ransmembrane protein, putative        | AM+K_not_in_group |
| Medtr7g087200 presenilin plant-like protein         | AM+K_not_in_group |
| Medtr7g088350 DHHC-type zinc finger protein         | AM+K_in_group     |
| Medtr7g088850 cell division control-like protein    | AM+K_not_in_group |
| Medtr7g090260 hypothetical protein                  | AM+K_not_in_group |
| Medtr7g090680 N-acetyltransferase                   | AM+K_not_in_group |
| Medtr7g090930 hypothetical protein                  | AM+K_not_in_group |
| Medtr7g091370 heat shock transcription factor       | AM+K_not_in_group |
| Medtr7g091450 ransmembrane protein, putative        | AM+K_not_in_group |
| Medtr7g092020 guanylate kinase-like protein         | AM+K_not_in_group |
| Medtr7g092360 /Threonine kinase family protein      | AM+K_not_in_group |
| Medtr7g092430 ceptor-like kinase family protein     | AM+K_not_in_group |
| Medtr7g092460 nucleolar gar2-like protein           | AM+K_not_in_group |
| Medtr7g092470 D-galacturonosidase-like protein      | AM+K_not_in_group |
| Medtr7g092510 transcription factor                  | AM+K_not_in_group |
| Medtr7g092970 hypothetical protein                  | AM+K_not_in_group |
| Medtr7g093000 termination factor family protein     | AM+K_not_in_group |
| Medtr7g093735 ransmembrane protein, putative        | AM+K_not_in_group |
| Medtr7g094100 hreonine-kinase RKF3, putative        | AM+K_not_in_group |
| Medtr7g095710 calcium-transporting ATPase           | AM+K_not_in_group |

diffusion\_prioritization\_ALL

|               |                                      |                   |
|---------------|--------------------------------------|-------------------|
| Medtr7g096170 | m transporter MRS2-like protein      | AM+K_not_in_group |
| Medtr7g096980 | ceptor-like kinase family protein    | AM+K_not_in_group |
| Medtr7g097030 | G1-like protein                      | AM+K_not_in_group |
| Medtr7g101290 | osphate phosphoribohydrolase         | AM+K_not_in_group |
| Medtr7g101800 | kinase 1B                            | AM+K_in_group     |
| Medtr7g104180 | reonine-kinase KIPK-like protein     | AM+K_not_in_group |
| Medtr7g104350 | cyclin delta-3, putative             | AM+K_not_in_group |
| Medtr7g104580 | ol acyltransferase family protein    | AM+K_not_in_group |
| Medtr7g105680 | 3P acetyltransferase-like protein    | AM+K_not_in_group |
| Medtr7g109300 | DUF761 domain protein                | AM+K_not_in_group |
| Medtr7g109670 | reonine-kinase ALE2-like protein     | AM+K_not_in_group |
| Medtr7g110320 | sa promoter-binding-like protein     | AM+K_not_in_group |
| Medtr7g112360 | haperone DnaJ domain protein         | AM+K_not_in_group |
| Medtr7g113220 | binding domain protein, putative     | AM+K_not_in_group |
| Medtr7g113620 | al membrane Yip1-family protein      | AM+K_not_in_group |
| Medtr7g114300 | cyclin-dependent kinase              | AM+K_not_in_group |
| Medtr7g116660 | receptor kinase-like protein         | AM+K_not_in_group |
| Medtr7g117395 | osphatidylinositol 3-and 4-kinase    | AM+K_not_in_group |
| Medtr7g117520 | trubbelig-receptor family protein    | AM+K_not_in_group |
| Medtr7g117910 | nall GTPase family RAB protein       | AM+K_not_in_group |
| Medtr7g117990 | steroid-binding domain protein       | AM+K_not_in_group |
| Medtr7g118100 | 4-lactone oxidase family protein     | AM+K_not_in_group |
| Medtr7g405830 | pirin-like plant protein             | AM+K_not_in_group |
| Medtr8g006705 | ssociated leucine zipper protein     | AM+K_not_in_group |
| Medtr8g008860 | thrin assembly plant-like protein    | AM+K_not_in_group |
| Medtr8g009000 | enhanced downy mildew protein        | AM+K_not_in_group |
| Medtr8g013580 | tor-like Serine/Threonine-kinase     | AM+K_not_in_group |
| Medtr8g013610 | tor-like Serine/Threonine-kinase     | AM+K_not_in_group |
| Medtr8g015450 | transcription factor                 | AM+K_not_in_group |
| Medtr8g016120 | ha hydrolase-like domain kinase      | AM+K_not_in_group |
| Medtr8g018310 | casein kinase I-like protein         | AM+K_not_in_group |
| Medtr8g021025 | s etical protein (other strand read) | AM+K_not_in_group |
| Medtr8g021250 | small nuclear ribonucleoprotein      | AM+K_not_in_group |
| Medtr8g023130 | carboxy-terminal region remorin      | AM+K_not_in_group |
| Medtr8g023780 | le acid phosphatase-like protein     | AM+K_not_in_group |
| Medtr8g024260 | PRR response regulator               | AM+K_not_in_group |
| Medtr8g026680 | Rac GTPase activating protein        | AM+K_not_in_group |
| Medtr8g027180 | alcium-binding EF-hand protein       | AM+K_not_in_group |
| Medtr8g027295 | nger DNA-binding family protein      | AM+K_not_in_group |
| Medtr8g027345 | myb transcription factor             | AM+K_not_in_group |
| Medtr8g032020 | ))-binding rossmann-fold protein     | AM+K_not_in_group |
| Medtr8g032570 | /beta-catenin-like repeat protein    | AM+K_not_in_group |
| Medtr8g037910 | enase FMO GS-OX-like protein         | AM+K_not_in_group |
| Medtr8g038440 | lutaredoxin (GRX) family protein     | AM+K_not_in_group |
| Medtr8g038620 | nse regulator ARR3-like protein      | AM+K_not_in_group |
| Medtr8g039540 | teinase nepenthesin-like protein     | AM+K_not_in_group |
| Medtr8g041580 | ike DNA-binding domain protein       | AM+K_not_in_group |
| Medtr8g042490 | bidirectional sugar transporter      | AM+K_not_in_group |
| Medtr8g058965 | ox/RNI/FBD-like domain protein       | AM+K_not_in_group |
| Medtr8g061890 | in sialophosphoprotein, putative     | AM+K_not_in_group |
| Medtr8g064850 | pantothenate kinase                  | AM+K_not_in_group |

diffusion\_prioritization\_ALL

|               |                                              |                   |
|---------------|----------------------------------------------|-------------------|
| Medtr8g066260 | MADS-box transcription factor                | AM+K_not_in_group |
| Medtr8g069350 | hypothetical protein                         | AM+K_in_group     |
| Medtr8g072310 | sugar transferase family protein             | AM+K_not_in_group |
| Medtr8g072440 | subtilisin-like serine protease              | AM+K_not_in_group |
| Medtr8g072610 | hypothetical protein                         | AM+K_not_in_group |
| Medtr8g074030 | independent isocitrate dehydrogenase         | AM+K_not_in_group |
| Medtr8g075770 | armadillo repeat only protein                | AM+K_not_in_group |
| Medtr8g078760 | electron transporter, putative               | AM+K_not_in_group |
| Medtr8g079120 | methylesterase                               | AM+K_not_in_group |
| Medtr8g079355 | NBS-LRR resistance protein                   | AM+K_not_in_group |
| Medtr8g079482 | carboxy-terminal region remorin              | AM+K_not_in_group |
| Medtr8g080240 | ATP-dependent RNA helicase                   | AM+K_not_in_group |
| Medtr8g081620 | chaperone DnaJ domain protein                | AM+K_not_in_group |
| Medtr8g083150 | RALF                                         | AM+K_not_in_group |
| Medtr8g083240 | LRR receptor-like kinase                     | AM+K_not_in_group |
| Medtr8g085280 | histidine kinase-, DNA gyrase B              | AM+K_not_in_group |
| Medtr8g085560 | seed storage/LTP family protein              | AM+K_not_in_group |
| Medtr8g085820 | chlorophyllide A oxygenase                   | AM+K_not_in_group |
| Medtr8g085850 | plant/F20M13-60 protein                      | AM+K_not_in_group |
| Medtr8g085900 | calmodulin-binding family protein            | AM+K_not_in_group |
| Medtr8g086000 | MAP kinase-like protein                      | AM+K_not_in_group |
| Medtr8g087420 | LRR receptor-like kinase                     | AM+K_not_in_group |
| Medtr8g087700 | hypothetical protein                         | AM+K_not_in_group |
| Medtr8g088210 | epolymerizing factor-like protein            | AM+K_not_in_group |
| Medtr8g088300 | tripeptide (PPR) repeat protein              | AM+K_not_in_group |
| Medtr8g088760 | LK (receptor-like kinase) protein            | AM+K_not_in_group |
| Medtr8g088930 | inositol 5-phosphate 5-kinase family protein | AM+K_not_in_group |
| Medtr8g091280 | aspartate aminotransferase                   | AM+K_not_in_group |
| Medtr8g091995 | nudix family hydrolase                       | AM+K_not_in_group |
| Medtr8g092580 | antisense protein (other strand read)        | AM+K_not_in_group |
| Medtr8g092590 | cellulose synthase-like protein              | AM+K_not_in_group |
| Medtr8g093440 | DUF506 family protein                        | AM+K_not_in_group |
| Medtr8g093730 | MAP kinase kinase kinase                     | AM+K_not_in_group |
| Medtr8g093860 | formylglycinamidine cyclo-ligase             | AM+K_not_in_group |
| Medtr8g095450 | ribosome complex subunit-like protein        | AM+K_not_in_group |
| Medtr8g098370 | TPR domain kinase                            | AM+K_not_in_group |
| Medtr8g098415 | phosphatase-binding rosmann-fold protein     | AM+K_not_in_group |
| Medtr8g098815 | BEL1-related homeotic protein                | AM+K_not_in_group |
| Medtr8g100000 | inositol phosphatase family protein          | AM+K_not_in_group |
| Medtr8g101600 | tetraspanin family protein                   | AM+K_not_in_group |
| Medtr8g101670 | phosphatase hydrolase-like domain kinase     | AM+K_not_in_group |
| Medtr8g102820 | alpha/beta-hydrolase domain protein          | AM+K_not_in_group |
| Medtr8g104520 | receptor-like kinase                         | AM+K_not_in_group |
| Medtr8g107110 | calcium-binding family protein               | AM+K_not_in_group |
| Medtr8g461040 | MAP kinase-like protein                      | AM+K_not_in_group |
| Medtr8g461110 | LRR receptor-like kinase, putative           | AM+K_not_in_group |
| Medtr8g461260 | receptor-like kinase                         | AM+K_not_in_group |
| Medtr8g464760 | phosphatase site-like protein, putative      | AM+K_not_in_group |
| Medtr8g468030 | peroxidase oxidase/kelch repeat protein      | AM+K_not_in_group |
| Medtr5g074500 | wound-induced-like protein                   | AM+K_not_in_group |
| Medtr4g109140 | DUF538 family protein                        | AM+K_not_in_group |

diffusion\_prioritization\_ALL

|                                                   |                   |
|---------------------------------------------------|-------------------|
| Medtr7g069740 GRAS family transcription factor    | AM+K_not_in_group |
| Medtr3g070880 at CCCH-type zinc finger protein    | AM+K_not_in_group |
| Medtr4g029200 class III peroxidase                | AM+K_not_in_group |
| Medtr2g063560 20/alpha crystallin family protein  | AM+K_not_in_group |
| Medtr7g092090 hypothetical protein                | AM+K_not_in_group |
| Medtr4g100975 ransmembrane protein, putative      | AM+K_not_in_group |
| Medtr4g065370 e-responsive transcription factor   | AM+K_not_in_group |
| Medtr4g100590 xygenase family oxidoreductase      | AM+K_not_in_group |
| Medtr5g078210 GDSL-like lipase/acylhydrolase      | AM+K_not_in_group |
| Medtr1g075230 sieve element occlusion protein     | AM+K_not_in_group |
| Medtr4g079760 tion factor bHLH107-like protein    | AM+K_not_in_group |
| Medtr3g074930 le acid phosphatase-like protein    | AM+K_not_in_group |
| Medtr4g011720 utarate-dependent dioxygenase       | AM+K_not_in_group |
| Medtr3g078240 NHL domain protein                  | AM+K_not_in_group |
| Medtr6g012730 cystathionine gamma-synthase        | AM+K_not_in_group |
| Medtr4g102450 expansin A10                        | AM+K_not_in_group |
| Medtr3g102980 C2H2-type zinc finger protein       | AM+K_not_in_group |
| Medtr4g029190 class III peroxidase                | AM+K_not_in_group |
| Medtr8g042900 xterase/pectinesterase inhibitor    | AM+K_not_in_group |
| Medtr2g069300 -carboxylate oxidase-like protein   | AM+K_not_in_group |
| Medtr7g100100 ;2 zinc finger transcription factor | AM+K_not_in_group |
| Medtr4g023730 flavonol 4-reductase-like protein   | AM+K_not_in_group |
| Medtr4g107720 ibrane-associated family protein    | AM+K_not_in_group |
| Medtr4g006970 CBL-interacting kinase              | AM+K_not_in_group |
| Medtr8g035780 cytochrome P450 family protein      | AM+K_not_in_group |
| Medtr8g100135 cytochrome P450 family protein      | AM+K_not_in_group |
| Medtr3g104780 class II small heat-shock protein   | AM+K_not_in_group |
| Medtr2g437770 peroxidase family protein           | AM+K_not_in_group |
| Medtr4g133800 peroxidase family protein           | AM+K_not_in_group |
| Medtr1g100777 at shock transcription factor B2A   | AM+K_not_in_group |
| Medtr7g109920 galactinol synthase                 | AM+K_not_in_group |
| Medtr8g018170 1 (TIR-NBS-LRR class), putative     | AM+K_not_in_group |
| Medtr5g025800 ransmembrane protein, putative      | AM+K_not_in_group |
| Medtr5g020060 plant/MUD21-2 protein               | AM+K_not_in_group |
| Medtr1g019110 ponsive element-binding protein     | AM+K_not_in_group |
| Medtr4g063945 kinase 1B                           | AM+K_not_in_group |
| Medtr7g017880 BZIP transcription factor           | AM+K_not_in_group |
| Medtr4g116870 plication licensing factor MCM4     | AM+K_not_in_group |
| Medtr1g077660 malate transporter family protein   | AM+K_not_in_group |
| Medtr2g086580 1 Rho GTPase activating protein     | AM+K_not_in_group |
| Medtr6g059760 psin inhibitor / Alpha-fucosidase   | AM+K_not_in_group |
| Medtr8g105190 hypothetical protein                | AM+K_not_in_group |
| Medtr2g022370 xtracellular dermal glycoprotein    | AM+K_not_in_group |
| Medtr4g027800 Lipid transfer protein              | AM+K_not_in_group |
| Medtr7g108650 TSPO/MBR family protein             | AM+K_not_in_group |
| Medtr5g015840 DUF2419 family protein              | AM+K_not_in_group |
| Medtr4g011880 ;ponsive AUX/IAA family protein     | AM+K_not_in_group |
| Medtr1g106730 C2H2-type zinc finger protein       | AM+K_not_in_group |
| Medtr5g084260 ile-specific Glycine Rich Peptide   | AM+K_not_in_group |
| Medtr3g028210 /anin 5-aromatic acyltransferase    | AM+K_not_in_group |
| Medtr4g014070 ceptor-like kinase family protein   | AM+K_not_in_group |

diffusion\_prioritization\_ALL

|               |                                    |                   |
|---------------|------------------------------------|-------------------|
| Medtr5g017160 | RALF                               | AM+K_not_in_group |
| Medtr8g066820 | ranscription factor family protein | AM+K_not_in_group |
| Medtr5g005850 | ydroxyisoflavanone dehydratase     | AM+K_not_in_group |
| Medtr1g075340 | and hageman factor-like protein    | AM+K_not_in_group |
| Medtr7g099800 | cation/H+ exchanger 3              | AM+K_not_in_group |
| Medtr8g432400 | C2 domain protein                  | AM+K_not_in_group |
| Medtr4g063940 | kinase 1B                          | AM+K_not_in_group |
| Medtr2g081050 | lin domain of heat shock protein   | AM+K_not_in_group |
| Medtr4g134290 | 6-phosphofructokinase              | AM+K_not_in_group |
| Medtr8g020560 | wth-regulating factor-like protein | AM+K_not_in_group |
| Medtr4g057470 | DUF1635 family protein             | AM+K_not_in_group |
| Medtr4g081950 | expansin-A1-like protein           | AM+K_not_in_group |
| Medtr7g070390 | ase resistance response protein    | AM+K_not_in_group |
| Medtr7g091830 | ransmembrane protein, putative     | AM+K_not_in_group |
| Medtr4g011020 | lyase/glyoxalase I family protein  | AM+K_not_in_group |
| Medtr4g088760 | plant/F8B4-180 protein             | AM+K_not_in_group |
| Medtr2g035430 | cationic amino acid transporter    | AM+K_not_in_group |
| Medtr2g034810 | DUF4378 domain protein             | AM+K_not_in_group |
| Medtr4g132840 | calcium-binding EF hand protein    | AM+K_not_in_group |
| Medtr8g091320 | o-inositol 1-phosphate synthase    | AM+K_not_in_group |
| Medtr5g079950 | expansin A10                       | AM+K_not_in_group |
| Medtr1g102370 | transcription factor               | AM+K_not_in_group |
| Medtr1g018320 | sigb regulation rsbq-like protein  | AM+K_not_in_group |
| Medtr1g105555 | ransmembrane protein, putative     | AM+K_not_in_group |
| Medtr7g028740 | sa promoter-binding-like protein   | AM+K_not_in_group |
| Medtr1g034030 | menting 1(SNF1)-related kinase     | AM+K_not_in_group |
| Medtr1g006695 | rotein ligase HERC2-like protein   | AM+K_not_in_group |
| Medtr2g079990 | transcription factor-like protein  | AM+K_not_in_group |
| Medtr6g084640 | dehydrin                           | AM+K_not_in_group |
| Medtr8g104290 | hypothetical protein               | AM+K_not_in_group |
| Medtr2g062730 | transcription factor-like protein  | AM+K_not_in_group |
| Medtr4g088055 | Rho-like GTP-binding protein       | AM+K_not_in_group |
| Medtr7g068650 | yanidin dioxygenase-like protein   | AM+K_not_in_group |
| Medtr4g066580 | oside hydrolase family 1 protein   | AM+K_not_in_group |
| Medtr1g077890 | ycystathionine gamma-synthase      | AM+K_not_in_group |
| Medtr1g015650 | hypothetical protein               | AM+K_not_in_group |
| Medtr1g104610 | cid dehalogenase-like hydrolase    | AM+K_not_in_group |
| Medtr4g048060 | DUF4228 domain protein             | AM+K_not_in_group |
| Medtr4g101310 | seed storage/LTP family protein    | AM+K_not_in_group |
| Medtr2g080010 | transcription factor-like protein  | AM+K_not_in_group |
| Medtr4g099010 | pectin methylesterase inhibitor    | AM+K_not_in_group |
| Medtr5g071560 | MAP kinase kinase kinase           | AM+K_not_in_group |
| Medtr2g061780 | ransmembrane protein, putative     | AM+K_not_in_group |
| Medtr1g083440 | mancy/auxin associated protein     | AM+K_not_in_group |
| Medtr2g096120 | hypothetical protein               | AM+K_not_in_group |
| Medtr4g055170 | e acyl-transferase family protein  | AM+K_not_in_group |
| Medtr8g026960 | associated leucine zipper protein  | AM+K_not_in_group |
| Medtr7g081410 | ceptor-like kinase family protein  | AM+K_not_in_group |
| Medtr4g031820 | ne P450 family monooxygenase       | AM+K_not_in_group |
| Medtr1g098460 | omain class transcription factor   | AM+K_not_in_group |
| Medtr4g094212 | ovirus multiplication-like protein | AM+K_not_in_group |



## diffusion\_prioritization\_ALL

|               |                                   |                   |
|---------------|-----------------------------------|-------------------|
| Medtr1g054935 | x ABC transporter family protein  | AM+K_not_in_group |
| Medtr7g115120 | transcription factor bZIP88       | AM+K_not_in_group |
| Medtr4g069810 | specific tissue protein           | AM+K_not_in_group |
| Medtr3g466200 | hemic peroxidase swpb3 protein    | AM+K_not_in_group |
| Medtr1g110870 | zinc finger constans-like protein | AM+K_not_in_group |
| Medtr1g083580 | F-box protein                     | AM+K_not_in_group |
| Medtr2g039320 | DUF4408 domain protein            | AM+K_not_in_group |
| Medtr5g082130 | hypothetical protein              | AM+K_not_in_group |
| Medtr1g101120 | PAR1 protein                      | AM+K_not_in_group |
| Medtr5g081560 | G/FYVE/PHD zinc finger protein    | AM+K_not_in_group |
| Medtr8g099065 | te hydrolase superfamily protein  | AM+K_not_in_group |
| Medtr3g092720 | protein/S30EA ribosomal protein   | AM+K_not_in_group |
| Medtr5g094550 | ochromes P450 family 71 protein   | AM+K_not_in_group |
| Medtr4g129270 | sphate synthase domain protein    | AM+K_not_in_group |
| Medtr4g074190 | responsive NPH3 family protein    | AM+K_not_in_group |
| Medtr1g087200 | universal stress family protein   | AM+K_not_in_group |
| Medtr4g039540 | hypothetical protein              | AM+K_not_in_group |
| Medtr7g103440 | LRR receptor-like kinase          | AM+K_not_in_group |
| Medtr4g007740 | aspartyl protease family protein  | AM+K_not_in_group |
| Medtr8g065010 | /galacturonase plant-like protein | AM+K_not_in_group |
| Medtr8g098360 | tubulin beta-1 chain              | AM+K_not_in_group |
| Medtr5g082150 | resistance HSPRO2-like protein    | AM+K_not_in_group |
| Medtr6g039440 | sesquiterpene synthase            | AM+K_not_in_group |
| Medtr3g030850 | photosystem II 5 kDa protein      | AM+K_not_in_group |
| Medtr8g028600 | propane-1-carboxylate synthase    | AM+K_not_in_group |
| Medtr8g070700 | osyltransferase family 92 protein | AM+K_not_in_group |
| Medtr3g084990 | ransmembrane protein, putative    | AM+K_not_in_group |
| Medtr8g075100 | peroxidase family protein         | AM+K_not_in_group |
| Medtr1g087240 | ifuranosidase/beta-D-xylosidase   | AM+K_not_in_group |
| Medtr4g078535 | LRR/extensin                      | AM+K_not_in_group |
| Medtr6g027920 | dependent methionine synthase     | AM+K_not_in_group |
| Medtr7g062310 | :/diphenol oxidase family protein | AM+K_not_in_group |
| Medtr5g064345 | hate-responsive 1 family protein  | AM+K_not_in_group |
| Medtr6g047880 | albumin I                         | AM+K_not_in_group |
| Medtr1g085500 | rhicadhesin receptor              | AM+K_not_in_group |
| Medtr7g085220 | transcription factor-like protein | AM+K_not_in_group |
| Medtr5g041940 | transcription factor-like protein | AM+K_not_in_group |
| Medtr8g023790 | l chlorophyll A/B-binding protein | AM+K_not_in_group |
| Medtr5g029910 | TPR repeat protein                | AM+K_not_in_group |
| Medtr2g016460 | scorbate transporter-like protein | AM+K_not_in_group |
| Medtr8g041620 | xygenase family oxidoreductase    | AM+K_not_in_group |
| Medtr1g099150 | hypothetical protein              | AM+K_not_in_group |
| Medtr5g091930 | synthase 3, peroxisomal protein   | AM+K_not_in_group |
| Medtr5g091690 | hypothetical protein              | AM+K_not_in_group |
| Medtr2g017950 | fasciclin domain protein          | AM+K_not_in_group |
| Medtr8g069925 | hypothetical protein              | AM+K_not_in_group |
| Medtr3g060880 | ceptor-like kinase family protein | AM+K_not_in_group |
| Medtr1g092420 | ransmembrane protein, putative    | AM+K_not_in_group |
| Medtr4g051515 | rotein ligase PUB23-like protein  | AM+K_not_in_group |
| Medtr4g082360 | ransmembrane protein, putative    | AM+K_not_in_group |
| Medtr2g034350 | hypothetical protein              | AM+K_not_in_group |

## diffusion\_prioritization\_ALL

|                |                                     |                   |
|----------------|-------------------------------------|-------------------|
| Medtr2g032710  | /galacturonase plant-like protein   | AM+K_not_in_group |
| Medtr7g024480  | ransmembrane protein, putative      | AM+K_not_in_group |
| Medtr2g014400  | ransmembrane protein, putative      | AM+K_not_in_group |
| Medtr5g094540  | ochrome P450 family 71 protein      | AM+K_not_in_group |
| Medtr7g011060  | expansin A10                        | AM+K_not_in_group |
| Medtr3g070850  | te hydrolase superfamily protein    | AM+K_not_in_group |
| Medtr4g053380  | clin-like arabinogalactan protein   | AM+K_not_in_group |
| Medtr5g022870  | peroxidase family protein           | AM+K_not_in_group |
| Medtr2g026760  | Lipid transfer protein              | AM+K_not_in_group |
| Medtr4g087890  | formin-like 2 domain protein        | AM+K_not_in_group |
| Medtr5g017260  | triacylglycerol lipase-like protein | AM+K_not_in_group |
| Medtr8g018690  | seed linoleate 9S-lipoxygenase      | AM+K_not_in_group |
| Medtr4g073770  | ProtKB/Swiss-Prot;Acc:Q8L883]       | AM+K_not_in_group |
| Medtr8g023310  | æsterase/pectinesterase inhibitor   | AM+K_not_in_group |
| Medtr2g093990  | clin-like arabinogalactan protein   | AM+K_not_in_group |
| Medtr0113s0040 | F-box protein                       | AM+K_not_in_group |
| Medtr3g103580  | in amino acid aminotransferase      | AM+K_not_in_group |
| Medtr2g090660  | hypothetical protein                | AM+K_not_in_group |
| Medtr2g097030  | expansin A10                        | AM+K_not_in_group |
| Medtr3g075320  | pectate lyase family protein        | AM+K_not_in_group |
| Medtr4g128750  | ProtKB/Swiss-Prot;Acc:Q40374]       | AM+K_not_in_group |
| Medtr5g078215  | GASA/GAST/Snakin                    | AM+K_not_in_group |
| Medtr4g128770  | -rich secretory protein, antigen 5  | AM+K_not_in_group |
| Medtr1g071480  | Serine/Threonine-kinase Nek4        | AM+K_not_in_group |
| Medtr7g101270  | hypothetical protein                | AM+K_not_in_group |
| Medtr3g063140  | yl/(E,E)-geranyl linalool synthase  | AM+K_not_in_group |
| Medtr5g094570  | ochrome P450 family 71 protein      | AM+K_not_in_group |
| Medtr7g013710  | ransmembrane protein, putative      | AM+K_not_in_group |
| Medtr7g057330  | F-box SKIP22-like protein           | AM+K_not_in_group |
| Medtr1g098680  | ABA/WDS induced protein             | AM+K_not_in_group |
| Medtr8g102800  | ethylene response factor            | AM+K_not_in_group |
| Medtr1g047370  | pectate lyase family protein        | AM+K_not_in_group |
| Medtr4g094340  | auxin-induced 5NG4-like protein     | AM+K_not_in_group |
| Medtr0011s0020 | cellulose synthase-like protein     | AM+K_not_in_group |
| Medtr5g004980  | ransmembrane protein, putative      | AM+K_not_in_group |
| Medtr4g023550  | DUF1499 family protein              | AM+K_not_in_group |
| Medtr7g081750  | subtilisin-like serine protease     | AM+K_not_in_group |
| Medtr6g088810  | pectinesterase                      | AM+K_not_in_group |
| Medtr5g085850  | peptide/nitrate transporter         | AM+K_not_in_group |
| Medtr1g100787  | ceptor-like kinase family protein   | AM+K_not_in_group |
| Medtr8g089745  | alpha-galactosidase                 | AM+K_not_in_group |
| Medtr8g096320  | bidirectional sugar transporter     | AM+K_not_in_group |
| Medtr7g062250  | yl/diphenol oxidase family protein  | AM+K_not_in_group |
| Medtr8g016370  | chaperonin CPN60-like protein       | AM+K_not_in_group |
| Medtr2g007960  | auxin-induced 5NG4-like protein     | AM+K_not_in_group |
| Medtr7g105850  | aspartyl protease family protein    | AM+K_not_in_group |
| Medtr8g044230  | LRR receptor-like kinase            | AM+K_not_in_group |
| Medtr4g085890  | carboxylase beta chain, putative    | AM+K_not_in_group |
| Medtr2g063110  | aspartyl protease family protein    | AM+K_not_in_group |
| Medtr3g099580  | plastocyanin-like domain protein    | AM+K_not_in_group |
| Medtr4g063130  | auxin-regulated protein             | AM+K_not_in_group |

diffusion\_prioritization\_ALL

|                |                                     |                   |
|----------------|-------------------------------------|-------------------|
| Medtr5g083500  | hypothetical protein                | AM+K_not_in_group |
| Medtr1g084120  | with kelch motif protein, putative  | AM+K_not_in_group |
| Medtr1g075180  | sieve element occlusion protein     | AM+K_not_in_group |
| Medtr8g479390  | multi-copper oxidase-like protein   | AM+K_not_in_group |
| Medtr4g118800  | plant integral membrane protein     | AM+K_not_in_group |
| Medtr5g053920  | d B3 domain transcription factor    | AM+K_not_in_group |
| Medtr6g033280  | phosphate carrier protein           | AM+K_not_in_group |
| Medtr0189s0010 | MAP3K-like kinase                   | AM+K_not_in_group |
| Medtr5g016410  | ochrome P450 family 81 protein      | AM+K_not_in_group |
| Medtr5g024020  | seed linoleate 9S-lipoxygenase      | AM+K_not_in_group |
| Medtr2g034720  | furanosidase/beta-D-xylosidase      | AM+K_not_in_group |
| Medtr5g091050  | enzyme A reductase-like protein     | AM+K_not_in_group |
| Medtr1g043350  | responsive transcription factor 1B  | AM+K_not_in_group |
| Medtr3g114530  | nucleoredoxin, putative             | AM+K_not_in_group |
| Medtr6g015815  | O-glucoside malonyltransferase      | AM+K_not_in_group |
| Medtr7g074935  | notif DNA-binding family protein    | AM+K_not_in_group |
| Medtr5g011990  | hypothetical protein                | AM+K_not_in_group |
| Medtr4g076255  | can endo-1,3-beta-glucosidase       | AM+K_not_in_group |
| Medtr1g018200  | beta-like galactosidase             | AM+K_not_in_group |
| Medtr1g084050  | ctianamine synthase-like protein    | AM+K_not_in_group |
| Medtr2g093980  | fasciclin domain protein            | AM+K_not_in_group |
| Medtr2g462000  | COBRA-like protein 2 precursor      | AM+K_not_in_group |
| Medtr4g059840  | clin-like arabinogalactan protein   | AM+K_not_in_group |
| Medtr6g021950  | pectate lyase family protein        | AM+K_not_in_group |
| Medtr8g087450  | fasciclin domain protein            | AM+K_not_in_group |
| Medtr7g026340  | l,3-beta-glucosidase-like protein   | AM+K_not_in_group |
| Medtr4g107110  | ciated TORTIFOLIA-like protein      | AM+K_not_in_group |
| Medtr5g063620  | histone H4 domain protein           | AM+K_not_in_group |
| Medtr2g018990  | /Threonine kinase family protein    | AM+K_not_in_group |
| Medtr2g068880  | 1 factor jungbrunnen-like protein   | AM+K_not_in_group |
| Medtr3g460790  | nudix family hydrolase              | AM+K_not_in_group |
| Medtr4g478130  | occlaurine synthase-like protein    | AM+K_not_in_group |
| Medtr5g066020  | notif DNA-binding family protein    | AM+K_not_in_group |
| Medtr6g022020  | 2 binding anthanogene-1 protein     | AM+K_not_in_group |
| Medtr1g057560  | yst subunit exo70 family protein    | AM+K_not_in_group |
| Medtr3g109450  | BZIP protein                        | AM+K_not_in_group |
| Medtr8g045735  | 3/dehydrase and lipid transporter   | AM+K_not_in_group |
| Medtr8g072010  | ctinacetylerase family protein      | AM+K_not_in_group |
| Medtr8g036080  | ine nucleotide-exchange protein     | AM+K_not_in_group |
| Medtr1g086510  | myb transcription factor            | AM+K_not_in_group |
| Medtr4g132010  | hypothetical protein                | AM+K_not_in_group |
| Medtr7g024765  | isferase (GNAT) domain protein      | AM+K_not_in_group |
| Medtr7g061020  | microtubule motor family protein    | AM+K_not_in_group |
| Medtr8g039090  | ione oxidoreductase-like protein    | AM+K_not_in_group |
| Medtr3g115050  | multi-copper oxidase-like protein   | AM+K_not_in_group |
| Medtr3g085020  | ransmembrane protein, putative      | AM+K_not_in_group |
| Medtr2g017980  | lymerase III subunit gamma/tau      | AM+K_not_in_group |
| Medtr8g009110  | 0-carboxylate oxidase-like protein  | AM+K_not_in_group |
| Medtr8g098835  | 3rring glycosyl group transferase   | AM+K_not_in_group |
| Medtr4g081870  | 3 transcription factor-like protein | AM+K_not_in_group |
| Medtr3g078160  | spotted leaf protein, putative      | AM+K_not_in_group |

diffusion\_prioritization\_ALL

|               |                                   |                   |
|---------------|-----------------------------------|-------------------|
| Medtr1g030630 | letoxication superfamily protein  | AM+K_not_in_group |
| Medtr1g074170 | ransfer flavoprotein subunit beta | AM+K_not_in_group |
| Medtr2g072270 | ne P450 family monooxygenase      | AM+K_not_in_group |
| Medtr3g081030 | RING-H2 zinc finger protein       | AM+K_not_in_group |
| Medtr3g087740 | exchanger and transporter sat-1   | AM+K_not_in_group |
| Medtr4g063090 | tonoplast intrinsic protein       | AM+K_not_in_group |
| Medtr4g108830 | 3HC4 type (RING finger) protein   | AM+K_not_in_group |
| Medtr5g066330 | hypothetical protein              | AM+K_not_in_group |
| Medtr7g090590 | GASA/GAST/Snakin                  | AM+K_not_in_group |
| Medtr8g059170 | transcription factor-like protein | AM+K_not_in_group |

## diffusion\_prioritization\_ALL

| <b>AM+K_score</b> | <b>AM_label</b> | <b>Myc_score</b> |
|-------------------|-----------------|------------------|
| 0.014049          | AM_not_in_group | 0.000839         |
| 0.002098          | AM_not_in_group | 0.000479         |
| 0.006927          | AM_not_in_group | 0.007511         |
| 0                 | AM_not_in_group | 0                |
| 0.000516          | AM_not_in_group | 0.002136         |
| 0.012358          | AM_not_in_group | 0.003846         |
| 0.001448          | AM_not_in_group | 0.001193         |
| 0.091487          | AM_not_in_group | 0.003762         |
| 0.033369          | AM_not_in_group | 0.001522         |
| 0.00464           | AM_not_in_group | 0.004572         |
| 0.00128           | AM_not_in_group | 0.000999         |
| 0                 | AM_not_in_group | 0                |
| 0                 | AM_not_in_group | 0                |
| 0                 | AM_not_in_group | 0                |
| 0.006036          | AM_not_in_group | 0.001738         |
| 0.008906          | AM_not_in_group | 0.003409         |
| 0.014434          | AM_not_in_group | 0.00119          |
| 0.001342          | AM_not_in_group | 0.000725         |
| 0.031517          | AM_not_in_group | 0.006982         |
| 0.000023          | AM_not_in_group | 0.000047         |
| 0                 | AM_not_in_group | 0                |
| 0.002533          | AM_not_in_group | 0.001232         |
| 0.004002          | AM_not_in_group | 0.0006           |
| 0.026446          | AM_not_in_group | 0.000599         |
| 0                 | AM_not_in_group | 0                |
| 0.00196           | AM_not_in_group | 0.004086         |
| 0.007447          | AM_not_in_group | 0.000011         |
| 0.007447          | AM_not_in_group | 0.000011         |
| 0.039298          | AM_not_in_group | 0.000345         |
| 0.002963          | AM_not_in_group | 0.000395         |
| 0.005649          | AM_not_in_group | 0.000439         |
| 0.045428          | AM_not_in_group | 0.001269         |
| 0.001141          | AM_not_in_group | 0.004396         |
| 0.041105          | AM_not_in_group | 0.000061         |
| 0.000657          | AM_not_in_group | 0.000953         |
| 0.010721          | AM_not_in_group | 0.008094         |
| 0                 | AM_not_in_group | 0                |
| 0.087892          | AM_not_in_group | 0.05705          |
| 0.023496          | AM_not_in_group | 0.000213         |
| 1                 | AM_not_in_group | 0.000213         |
| 0.005088          | AM_not_in_group | 0.000372         |
| 0.002732          | AM_not_in_group | 0.000958         |
| 0.002732          | AM_not_in_group | 0.000958         |
| 0.002732          | AM_not_in_group | 0.000958         |
| 0.000416          | AM_not_in_group | 0.001112         |
| 0.000416          | AM_not_in_group | 0.001112         |
| 0.123317          | AM_not_in_group | 0.057812         |

## diffusion\_prioritization\_ALL

|          |                 |          |
|----------|-----------------|----------|
| 0.005173 | AM_not_in_group | 0.002628 |
| 0.000117 | AM_not_in_group | 0.000049 |
| 0.000117 | AM_not_in_group | 0.000049 |
| 0.000117 | AM_not_in_group | 0.000049 |
| 0.000102 | AM_not_in_group | 0.000201 |
| 0.007289 | AM_not_in_group | 0.000525 |
| 0.000965 | AM_not_in_group | 0.000423 |
| 0.029224 | AM_not_in_group | 0.001202 |
| 0.002191 | AM_not_in_group | 0.000085 |
| 0.163772 | AM_not_in_group | 0.020043 |
| 0.056583 | AM_not_in_group | 0.013979 |
| 0.005504 | AM_not_in_group | 0.002976 |
| 0.005846 | AM_not_in_group | 0.001788 |
| 0.020962 | AM_not_in_group | 0.000174 |
| 0.000033 | AM_not_in_group | 0.00007  |
| 0        | AM_not_in_group | 0        |
| 0        | AM_not_in_group | 0        |
| 0        | AM_not_in_group | 0        |
| 0.001322 | AM_not_in_group | 0.001307 |
| 0.000169 | AM_not_in_group | 0.000247 |
| 0        | AM_not_in_group | 0        |
| 0.02424  | AM_not_in_group | 0.000641 |
| 0.003311 | AM_not_in_group | 0.001718 |
| 0.184929 | AM_not_in_group | 0.000036 |
| 0.169675 | AM_not_in_group | 0.001772 |
| 0.024374 | AM_not_in_group | 0.068231 |
| 0.001506 | AM_not_in_group | 0.000071 |
| 0.001953 | AM_not_in_group | 0.000558 |
| 0.000093 | AM_not_in_group | 0.000157 |
| 0.000526 | AM_not_in_group | 0.000694 |
| 0.124016 | AM_not_in_group | 0.000183 |
| 0.005969 | AM_not_in_group | 0.000052 |
| 0.03091  | AM_not_in_group | 0.006047 |
| 0.002515 | AM_not_in_group | 0.000016 |
| 0.00826  | AM_not_in_group | 0.003731 |
| 0.000033 | AM_not_in_group | 0.000105 |
| 0.003702 | AM_not_in_group | 0.000221 |
| 0.003702 | AM_not_in_group | 0.000221 |
| 0.082962 | AM_not_in_group | 0.077787 |
| 0.020869 | AM_not_in_group | 0.000112 |
| 0.000561 | AM_not_in_group | 0.001434 |
| 0.003076 | AM_not_in_group | 0.051884 |
| 0.005954 | AM_not_in_group | 0.0011   |
| 0.000215 | AM_not_in_group | 0.00089  |
| 0.000215 | AM_not_in_group | 0.00089  |

## diffusion\_prioritization\_ALL

|          |                 |          |
|----------|-----------------|----------|
| 0.078401 | AM_not_in_group | 0.000512 |
| 0.007135 | AM_not_in_group | 0.000275 |
| 0.034744 | AM_not_in_group | 0.014691 |
| 0.002294 | AM_not_in_group | 0.004387 |
| 0.000461 | AM_not_in_group | 0.000041 |
| 0.000711 | AM_not_in_group | 0.000137 |
| 0.004719 | AM_not_in_group | 0.000577 |
| 0.000142 | AM_not_in_group | 0.000043 |
| 0.000142 | AM_not_in_group | 0.000043 |
| 0.019541 | AM_not_in_group | 0.003276 |
| 0.011063 | AM_not_in_group | 0.045826 |
| 0.003711 | AM_not_in_group | 0.000393 |
| 0.002322 | AM_not_in_group | 0.000015 |
| 0.002322 | AM_not_in_group | 0.000015 |
| 0.002322 | AM_not_in_group | 0.000015 |
| 0.000503 | AM_not_in_group | 0.000733 |
| 0.000596 | AM_not_in_group | 0.000079 |
| 0.007215 | AM_not_in_group | 0.001387 |
| 0.123515 | AM_not_in_group | 0.002141 |
| 0.001252 | AM_not_in_group | 0.000413 |
| 0.000269 | AM_not_in_group | 0.000113 |
| 0.001219 | AM_not_in_group | 0.001526 |
| 0.160438 | AM_not_in_group | 0.000149 |
| 0.007562 | AM_not_in_group | 0.011059 |
| 0.001359 | AM_not_in_group | 0.000127 |
| 0.000004 | AM_not_in_group | 0.000001 |
| 0.000155 | AM_not_in_group | 0.000859 |
| 0.000189 | AM_not_in_group | 0.000025 |
| 0.001836 | AM_not_in_group | 0.001267 |
| 0.136926 | AM_not_in_group | 0.00158  |
| 0.02865  | AM_not_in_group | 0.029007 |
| 0.000672 | AM_not_in_group | 0.000463 |
| 0.0129   | AM_not_in_group | 0.004957 |
| 0.001582 | AM_not_in_group | 0.000141 |
| 0.050038 | AM_not_in_group | 0.000329 |
| 1        | AM_not_in_group | 0.000329 |
| 0.003385 | AM_not_in_group | 0.010191 |
| 0.000534 | AM_not_in_group | 0.001231 |

diffusion\_prioritization\_ALL

|          |                 |          |
|----------|-----------------|----------|
| 0.000534 | AM_not_in_group | 0.001231 |
| 0.008225 | AM_not_in_group | 0.001075 |
| 0.000838 | AM_not_in_group | 0.000904 |
| 0.154366 | AM_not_in_group | 0.000446 |
| 0.000066 | AM_not_in_group | 0.000012 |
| 0.022313 | AM_not_in_group | 0.000639 |
| 0.022313 | AM_not_in_group | 0.000639 |
| 0.022313 | AM_not_in_group | 0.000639 |
| 1        | AM_not_in_group | 0.000639 |
| 0.022313 | AM_not_in_group | 0.000639 |
| 0.022313 | AM_not_in_group | 0.000639 |
| 0.022313 | AM_not_in_group | 0.000639 |
| 0.000189 | AM_not_in_group | 0.000379 |
| 0.000635 | AM_not_in_group | 0.000131 |
| 0.040921 | AM_not_in_group | 0.002633 |
| 0.000142 | AM_not_in_group | 0.000068 |
| 0.001574 | AM_not_in_group | 0.000441 |
| 0.001979 | AM_not_in_group | 0.003137 |
| 0.002535 | AM_not_in_group | 0.003421 |
| 0.002535 | AM_not_in_group | 0.003421 |
| 0.002535 | AM_not_in_group | 0.003421 |
| 0.011599 | AM_not_in_group | 0.000161 |
| 0.002651 | AM_not_in_group | 0.000336 |
| 0.002952 | AM_not_in_group | 0.006389 |
| 0.000227 | AM_not_in_group | 0.000037 |
| 0.000805 | AM_not_in_group | 0.00215  |
| 0.008281 | AM_not_in_group | 0.001841 |
| 0.011275 | AM_not_in_group | 0.000074 |
| 0.155519 | AM_not_in_group | 0.035875 |
| 0.072354 | AM_not_in_group | 0.021433 |
| 0.001153 | AM_not_in_group | 0.000728 |
| 0.001678 | AM_not_in_group | 0.000721 |
| 0.001475 | AM_not_in_group | 0.000409 |
| 0.053155 | AM_not_in_group | 0.000021 |
| 0.00382  | AM_not_in_group | 0.001768 |
| 0.00494  | AM_not_in_group | 0.002177 |
| 0        | AM_not_in_group | 0        |
| 0        | AM_not_in_group | 0        |
| 0.00222  | AM_not_in_group | 0.0004   |
| 0.012432 | AM_not_in_group | 0.001029 |
| 0.002739 | AM_not_in_group | 0.00696  |
| 0.000413 | AM_not_in_group | 0.000941 |
| 0.000302 | AM_not_in_group | 0.000074 |
| 0.000302 | AM_not_in_group | 0.000074 |
| 0.000302 | AM_not_in_group | 0.000074 |
| 0.03515  | AM_not_in_group | 0.000053 |
| 0.00018  | AM_not_in_group | 0.000579 |



diffusion\_prioritization\_ALL

|          |                 |          |
|----------|-----------------|----------|
| 0.00441  | AM_not_in_group | 0.002499 |
| 0.00441  | AM_not_in_group | 0.002499 |
| 0.02049  | AM_not_in_group | 0.003606 |
| 0.014162 | AM_in_group     | 1        |
| 0.004691 | AM_not_in_group | 0.001049 |
| 0.00297  | AM_not_in_group | 0.000054 |
| 0.003977 | AM_not_in_group | 0.010936 |
| 0.000121 | AM_not_in_group | 0.00003  |
| 0.004091 | AM_not_in_group | 0.001536 |
| 0.003107 | AM_not_in_group | 0.000137 |
| 0.023429 | AM_not_in_group | 0.005346 |
| 0.049071 | AM_not_in_group | 0.00002  |
| 1        | AM_not_in_group | 0.00002  |
| 0.049071 | AM_not_in_group | 0.00002  |
| 0.024498 | AM_not_in_group | 0.019654 |
| 0.004375 | AM_not_in_group | 0.000937 |
| 0.102321 | AM_not_in_group | 0.117177 |
| 0.095097 | AM_not_in_group | 0.005356 |
| 0.001601 | AM_not_in_group | 0.001736 |
| 0.001601 | AM_not_in_group | 0.001736 |
| 0.001601 | AM_not_in_group | 0.001736 |
| 0.001246 | AM_not_in_group | 0.00338  |
| 1        | AM_not_in_group | 0.00789  |
| 0.046759 | AM_not_in_group | 0.001715 |
| 0.000269 | AM_not_in_group | 0.008822 |
| 0.000754 | AM_not_in_group | 0.000983 |
| 0.027691 | AM_not_in_group | 0.063305 |
| 0.006982 | AM_not_in_group | 0.004882 |
| 0.07578  | AM_not_in_group | 0.058772 |
| 0.003919 | AM_not_in_group | 0.011542 |
| 0.000355 | AM_not_in_group | 0.000362 |
| 0.000355 | AM_not_in_group | 0.000362 |
| 0.000355 | AM_not_in_group | 0.000362 |
| 0.003307 | AM_not_in_group | 0.113448 |
| 0.116697 | AM_not_in_group | 0.00021  |
| 0.00253  | AM_not_in_group | 0.000982 |
| 0.07788  | AM_not_in_group | 0.012047 |
| 0.000195 | AM_not_in_group | 0.000385 |
| 0.001609 | AM_not_in_group | 0.000087 |
| 0.001629 | AM_not_in_group | 0.001297 |

## diffusion\_prioritization\_ALL

|          |                 |          |
|----------|-----------------|----------|
| 0.045991 | AM_not_in_group | 0.015966 |
| 0.000491 | AM_not_in_group | 0.000265 |
| 0.016801 | AM_not_in_group | 0.019196 |
| 0.13119  | AM_not_in_group | 0.000066 |
| 0.002157 | AM_not_in_group | 0.001314 |
| 0.017882 | AM_not_in_group | 0.000188 |
| 0.031719 | AM_not_in_group | 0.00776  |
| 1        | AM_not_in_group | 0.000084 |
| 0.000015 | AM_not_in_group | 0.000305 |
| 0.028665 | AM_not_in_group | 0.000606 |
| 0.000473 | AM_not_in_group | 0.002569 |
| 0.00918  | AM_not_in_group | 0.019196 |
| 0.022302 | AM_not_in_group | 0.006229 |
| 0.006737 | AM_not_in_group | 0.003633 |
| 0.000715 | AM_not_in_group | 0.000095 |
| 0.016768 | AM_not_in_group | 0.029088 |
| 0.069578 | AM_not_in_group | 0.047788 |
| 0.001443 | AM_not_in_group | 0.001565 |
| 0.016986 | AM_not_in_group | 0.001073 |
| 0.016986 | AM_not_in_group | 0.001073 |
| 0.000382 | AM_not_in_group | 0.000314 |
| 0.013157 | AM_not_in_group | 0.003351 |
| 0.000519 | AM_not_in_group | 0.000097 |
| 0.001235 | AM_not_in_group | 0.003659 |
| 0.00025  | AM_not_in_group | 0.000074 |
| 0.106407 | AM_not_in_group | 0.071498 |
| 0.003638 | AM_not_in_group | 0.002061 |
| 0.071761 | AM_not_in_group | 0.00518  |
| 0.009074 | AM_not_in_group | 0.005344 |
| 0.007355 | AM_not_in_group | 0.002331 |
| 0.00066  | AM_not_in_group | 0.011445 |
| 0.004517 | AM_not_in_group | 0.001992 |
| 0.065108 | AM_not_in_group | 0.034264 |
| 0.001482 | AM_not_in_group | 0.00001  |
| 0.189672 | AM_not_in_group | 0.562431 |
| 0.017127 | AM_not_in_group | 0.000025 |
| 0.017127 | AM_not_in_group | 0.000025 |
| 0.010285 | AM_not_in_group | 0.000247 |
| 0.000456 | AM_not_in_group | 0.000247 |
| 0.000456 | AM_not_in_group | 0.000247 |
| 0.000564 | AM_not_in_group | 0.000129 |
| 0.000019 | AM_not_in_group | 0.000062 |

diffusion\_prioritization\_ALL

|          |                 |          |
|----------|-----------------|----------|
| 0.000513 | AM_not_in_group | 0.000437 |
| 0.01551  | AM_not_in_group | 0.017722 |
| 0.002624 | AM_not_in_group | 0.000569 |
| 0.024109 | AM_not_in_group | 0.000991 |
| 0.028089 | AM_not_in_group | 0.007868 |
| 0.004847 | AM_not_in_group | 0.001759 |
| 0.000008 | AM_not_in_group | 0.000016 |
| 0.007177 | AM_not_in_group | 0.00205  |
| 0.249969 | AM_not_in_group | 0.000233 |
| 0.037835 | AM_not_in_group | 0.00008  |
| 0.003448 | AM_not_in_group | 0.006573 |
| 0.001779 | AM_not_in_group | 0.000554 |
| 0.031037 | AM_not_in_group | 0.016601 |
| 0.009883 | AM_not_in_group | 0.000788 |
| 0        | AM_not_in_group | 0        |
| 0        | AM_not_in_group | 0        |
| 0        | AM_not_in_group | 0        |
| 0.004604 | AM_not_in_group | 0.002238 |
| 0.000419 | AM_not_in_group | 0.000081 |
| 0.018267 | AM_not_in_group | 0.002449 |
| 0.000396 | AM_not_in_group | 0.000882 |
| 0.002094 | AM_in_group     | 1        |
| 0.002094 | AM_not_in_group | 0.013641 |
| 0.005373 | AM_not_in_group | 0.00144  |
| 0.104356 | AM_not_in_group | 0.018268 |
| 1        | AM_not_in_group | 0.00213  |
| 0.000016 | AM_not_in_group | 0.000034 |
| 0.001252 | AM_not_in_group | 0.000372 |
| 0.020106 | AM_not_in_group | 0.001397 |
| 0.009262 | AM_not_in_group | 0.010538 |
| 0.001123 | AM_not_in_group | 0.000635 |
| 0.000082 | AM_not_in_group | 0.000119 |
| 0.000082 | AM_not_in_group | 0.000119 |
| 0.001374 | AM_not_in_group | 0.131393 |
| 0.099298 | AM_not_in_group | 0.000376 |

## diffusion\_prioritization\_ALL

|          |                 |          |
|----------|-----------------|----------|
| 0.091408 | AM_not_in_group | 0.000773 |
| 0.036554 | AM_not_in_group | 0.000042 |
| 0.000325 | AM_not_in_group | 0.000074 |
| 0.001264 | AM_not_in_group | 0.000819 |
| 1        | AM_not_in_group | 0.074924 |
| 0.000434 | AM_not_in_group | 0.000304 |
| 0.001206 | AM_not_in_group | 0.003163 |
| 0.000042 | AM_not_in_group | 0.000008 |
| 0.00687  | AM_not_in_group | 0.022077 |
| 0.007469 | AM_not_in_group | 0.011125 |
| 0.007469 | AM_not_in_group | 0.011125 |
| 0.007469 | AM_not_in_group | 0.011125 |
| 0.006547 | AM_not_in_group | 0.000982 |
| 0.000798 | AM_not_in_group | 0.000388 |
| 0.001205 | AM_not_in_group | 0.000687 |
| 0.000667 | AM_not_in_group | 0.00139  |
| 0.000667 | AM_not_in_group | 0.00139  |
| 0.000667 | AM_not_in_group | 0.00139  |
| 0.000725 | AM_not_in_group | 0.000034 |
| 0.004125 | AM_not_in_group | 0.00978  |
| 0.002596 | AM_not_in_group | 0.001055 |
| 0.001261 | AM_not_in_group | 0.000189 |
| 0.002872 | AM_not_in_group | 0.000025 |
| 0.0003   | AM_not_in_group | 0.000069 |
| 1        | AM_not_in_group | 0.120931 |
| 0.067495 | AM_not_in_group | 0.036492 |
| 0.024058 | AM_not_in_group | 0.000534 |
| 0.002255 | AM_not_in_group | 0.011305 |
| 0.00806  | AM_not_in_group | 0.010047 |

diffusion\_prioritization\_ALL

|          |                 |          |
|----------|-----------------|----------|
| 0.002358 | AM_not_in_group | 0.000459 |
| 0.000941 | AM_not_in_group | 0.001371 |
| 0.029444 | AM_not_in_group | 0.007329 |
| 0.000307 | AM_not_in_group | 0.000287 |
| 0.044893 | AM_not_in_group | 0.002307 |
| 0.000649 | AM_not_in_group | 0.000582 |
| 0.000602 | AM_not_in_group | 0.00055  |
| 0.001097 | AM_not_in_group | 0.001514 |
| 0.003433 | AM_not_in_group | 0.000132 |
| 0.019097 | AM_not_in_group | 0.021841 |
| 0.019097 | AM_not_in_group | 0.021841 |
| 0.019097 | AM_not_in_group | 0.021841 |
| 0.004543 | AM_not_in_group | 0.00328  |
| 0.000372 | AM_not_in_group | 0.000077 |
| 0.001779 | AM_not_in_group | 0.000138 |
| 0.001779 | AM_not_in_group | 0.000138 |
| 0.001779 | AM_not_in_group | 0.000138 |
| 0.015345 | AM_not_in_group | 0.004906 |
| 0.021147 | AM_not_in_group | 0.020968 |
| 0.009402 | AM_not_in_group | 0.001576 |
| 0.000141 | AM_not_in_group | 0.000127 |
| 0.017594 | AM_in_group     | 1        |
| 0.00253  | AM_not_in_group | 0.000623 |
| 0.031322 | AM_not_in_group | 0.000013 |
| 0.000296 | AM_not_in_group | 0.000231 |
| 0.010919 | AM_not_in_group | 0.00246  |
| 0.000411 | AM_not_in_group | 0.000613 |
| 0.000472 | AM_not_in_group | 0.000344 |
| 0.002633 | AM_not_in_group | 0.0007   |
| 0.066139 | AM_not_in_group | 0.185149 |
| 0.03037  | AM_not_in_group | 0.001172 |

diffusion\_prioritization\_ALL

|          |                 |          |
|----------|-----------------|----------|
| 0.000271 | AM_not_in_group | 0.000089 |
| 0.002706 | AM_not_in_group | 0.002845 |
| 0.094203 | AM_not_in_group | 0.066727 |
| 0.001361 | AM_not_in_group | 0.001005 |
| 0.020099 | AM_not_in_group | 0.019774 |
| 0.007717 | AM_not_in_group | 0.001225 |
| 0.016264 | AM_not_in_group | 0.000113 |
| 0.061645 | AM_not_in_group | 0.054589 |
| 1        | AM_not_in_group | 0.000061 |
| 0.033667 | AM_not_in_group | 0.026644 |
| 0.001899 | AM_not_in_group | 0.000891 |
| 0.000328 | AM_not_in_group | 0.000144 |
| 0.000328 | AM_not_in_group | 0.000144 |
| 0.000328 | AM_not_in_group | 0.000144 |
| 0.019474 | AM_not_in_group | 0.070913 |
| 0.007284 | AM_not_in_group | 0.001064 |
| 0.003759 | AM_not_in_group | 0.000177 |
| 0.002241 | AM_not_in_group | 0.000469 |
| 0.000341 | AM_not_in_group | 0.00009  |
| 0.028887 | AM_not_in_group | 0.006615 |
| 0.068919 | AM_not_in_group | 0.000014 |
| 0.068919 | AM_not_in_group | 0.000014 |
| 0.068919 | AM_not_in_group | 0.000014 |
| 0.00218  | AM_not_in_group | 0.000606 |
| 0.000951 | AM_not_in_group | 0.000782 |
| 0.017628 | AM_not_in_group | 0.000154 |
| 0.000938 | AM_not_in_group | 0.000924 |
| 0.00052  | AM_not_in_group | 0.000111 |
| 0.005041 | AM_not_in_group | 0.001344 |
| 0.001181 | AM_not_in_group | 0.000598 |
| 0.025494 | AM_not_in_group | 0.073734 |
| 0.001874 | AM_not_in_group | 0.000266 |
| 0.004261 | AM_not_in_group | 0.000081 |
| 0.000914 | AM_not_in_group | 0.000991 |
| 0.008163 | AM_not_in_group | 0.000181 |
| 0.027318 | AM_not_in_group | 0.090255 |
| 0.000856 | AM_not_in_group | 0.002626 |
| 1        | AM_not_in_group | 0.000068 |
| 0.046218 | AM_not_in_group | 0.000068 |
| 0.086377 | AM_not_in_group | 0.071587 |
| 0.021665 | AM_not_in_group | 0.065294 |
| 0.005784 | AM_not_in_group | 0.001907 |
| 0.01261  | AM_not_in_group | 0.003957 |

diffusion\_prioritization\_ALL

|          |                 |          |
|----------|-----------------|----------|
| 0.007019 | AM_not_in_group | 0.001555 |
| 0.007019 | AM_not_in_group | 0.001555 |
| 0.027189 | AM_not_in_group | 0.006227 |
| 0.027189 | AM_not_in_group | 0.006227 |
| 0.000109 | AM_not_in_group | 0.000018 |
| 0.011531 | AM_not_in_group | 0.000409 |
| 0.000091 | AM_not_in_group | 0.000372 |
| 0.000671 | AM_not_in_group | 0.000543 |
| 0        | AM_not_in_group | 0        |
| 0.001928 | AM_not_in_group | 0.000116 |
| 0.0099   | AM_not_in_group | 0.011312 |
| 0.001815 | AM_not_in_group | 0.000861 |
| 0.000002 | AM_not_in_group | 0        |
| 0.001413 | AM_not_in_group | 0.000103 |
| 0.09889  | AM_not_in_group | 0.003431 |
| 0.031171 | AM_not_in_group | 0.01058  |
| 0.009971 | AM_not_in_group | 0.009918 |
| 0.13828  | AM_not_in_group | 0.000268 |
| 0.007121 | AM_not_in_group | 0.000914 |
| 0.001576 | AM_not_in_group | 0.000478 |
| 0.001199 | AM_not_in_group | 0.000225 |
| 0.000283 | AM_not_in_group | 0.000124 |
| 0.0631   | AM_not_in_group | 0.024179 |
| 0.00952  | AM_not_in_group | 0.000573 |
| 0.000076 | AM_not_in_group | 0.00001  |
| 0.001817 | AM_not_in_group | 0.002924 |
| 0.004482 | AM_not_in_group | 0.001097 |
| 0.134915 | AM_not_in_group | 0.000429 |
| 0.001421 | AM_not_in_group | 0.003792 |
| 0.000568 | AM_not_in_group | 0.001959 |
| 0.05867  | AM_not_in_group | 0.000273 |
| 0.010129 | AM_not_in_group | 0.001299 |
| 0.000541 | AM_not_in_group | 0.000019 |
| 0.002939 | AM_not_in_group | 0.006295 |
| 0.003243 | AM_not_in_group | 0.006552 |
| 0.000467 | AM_not_in_group | 0.000154 |
| 0.000467 | AM_not_in_group | 0.000154 |
| 0.000467 | AM_not_in_group | 0.000154 |
| 0.018008 | AM_not_in_group | 0.018075 |
| 0.035818 | AM_not_in_group | 0.000115 |
| 0.033982 | AM_not_in_group | 0.00232  |

diffusion\_prioritization\_ALL

|          |                 |          |
|----------|-----------------|----------|
| 0.004101 | AM_not_in_group | 0.000102 |
| 0.001667 | AM_not_in_group | 0.000254 |
| 0.001366 | AM_not_in_group | 0.00781  |
| 0.01954  | AM_not_in_group | 0.0082   |
| 0.007297 | AM_not_in_group | 0.00094  |
| 0.011047 | AM_not_in_group | 0.005679 |
| 0.001543 | AM_not_in_group | 0.001218 |
| 0.001463 | AM_not_in_group | 0.000582 |
| 0.002209 | AM_not_in_group | 0.00042  |
| 0.000656 | AM_not_in_group | 0.000184 |
| 0.000264 | AM_not_in_group | 0.001016 |
| 0.00072  | AM_not_in_group | 0.079    |
| 0.000454 | AM_not_in_group | 0.000569 |
| 0.000454 | AM_not_in_group | 0.000569 |
| 0.000454 | AM_not_in_group | 0.000569 |
| 0.030018 | AM_not_in_group | 0.007902 |
| 0.000008 | AM_not_in_group | 0.000002 |
| 0.00066  | AM_not_in_group | 0.000088 |
| 0.006137 | AM_not_in_group | 0.004416 |
| 1        | AM_not_in_group | 0.001404 |
| 0.012135 | AM_not_in_group | 0.000856 |
| 0.00041  | AM_not_in_group | 0.002479 |
| 0.00007  | AM_not_in_group | 0.000009 |
| 0.00007  | AM_not_in_group | 0.000009 |
| 0.009736 | AM_not_in_group | 0.001905 |
| 0.001529 | AM_not_in_group | 0.000827 |
| 0.059182 | AM_not_in_group | 0.000388 |
| 0.00602  | AM_not_in_group | 0.001334 |
| 0.001227 | AM_not_in_group | 0.00009  |
| 0.001596 | AM_not_in_group | 0.000579 |



## diffusion\_prioritization\_ALL

|          |                 |          |
|----------|-----------------|----------|
| 0.000004 | AM_not_in_group | 0.000001 |
| 0.001484 | AM_not_in_group | 0.000322 |
| 0.000583 | AM_not_in_group | 0.000052 |
| 0.006056 | AM_not_in_group | 0.002737 |
| 0.000191 | AM_not_in_group | 0.000044 |
| 0.042021 | AM_not_in_group | 0.000728 |
| 1        | AM_not_in_group | 0.000728 |
| 0.042021 | AM_not_in_group | 0.000728 |
| 0.001033 | AM_not_in_group | 0.000723 |
| 0.012947 | AM_not_in_group | 0.006799 |
| 0.002193 | AM_not_in_group | 0.004143 |
| 0.008381 | AM_not_in_group | 0.003803 |
| 0.000094 | AM_not_in_group | 0.000185 |
| 0.001548 | AM_not_in_group | 0.000592 |
| 0.00107  | AM_not_in_group | 0.007718 |
| 0.000146 | AM_not_in_group | 0.000212 |
| 0.176343 | AM_not_in_group | 0.00076  |
| 0.012112 | AM_not_in_group | 0.006548 |
| 0.00176  | AM_not_in_group | 0.000712 |
| 0.000025 | AM_not_in_group | 0.000005 |
| 0.072763 | AM_not_in_group | 0.015806 |
| 0.000147 | AM_not_in_group | 0.000013 |
| 0.034852 | AM_not_in_group | 0.012083 |
| 0.000236 | AM_not_in_group | 0.000128 |
| 0.000236 | AM_not_in_group | 0.000128 |
| 0.001704 | AM_not_in_group | 0.000251 |

diffusion\_prioritization\_ALL

|          |                 |          |
|----------|-----------------|----------|
| 0.001704 | AM_not_in_group | 0.000251 |
| 0.009408 | AM_not_in_group | 0.000263 |
| 0.041781 | AM_not_in_group | 0.000403 |
| 0.004323 | AM_not_in_group | 0.00006  |
| 0.004323 | AM_not_in_group | 0.00006  |
| 0.000462 | AM_not_in_group | 0.000043 |
| 0.000462 | AM_not_in_group | 0.000043 |
| 0.000462 | AM_not_in_group | 0.000043 |
| 0.009985 | AM_not_in_group | 0.004905 |
| 0.004417 | AM_not_in_group | 0.009236 |
| 0.067965 | AM_not_in_group | 0.008104 |
| 0.001542 | AM_not_in_group | 0.0077   |
| 0.004643 | AM_not_in_group | 0.032687 |
| 1        | AM_not_in_group | 0.018269 |
| 0.007965 | AM_not_in_group | 0.00064  |
| 0.006149 | AM_not_in_group | 0.000033 |
| 0.000591 | AM_not_in_group | 0.000078 |
| 1        | AM_not_in_group | 0.000329 |
| 0.000538 | AM_not_in_group | 0.000048 |
| 0.017796 | AM_not_in_group | 0.000549 |
| 0.00043  | AM_not_in_group | 0.000271 |
| 0.00043  | AM_not_in_group | 0.000271 |
| 0.017023 | AM_not_in_group | 0.000112 |
| 0.017023 | AM_not_in_group | 0.000112 |
| 0.017023 | AM_not_in_group | 0.000112 |
| 0.062988 | AM_not_in_group | 0.011377 |
| 1        | AM_not_in_group | 0.003965 |
| 0.022083 | AM_not_in_group | 0.003965 |
| 1        | AM_not_in_group | 0.003965 |
| 0.022083 | AM_not_in_group | 0.003965 |
| 0.022083 | AM_not_in_group | 0.003965 |
| 0.022559 | AM_not_in_group | 0.008971 |
| 0.022559 | AM_not_in_group | 0.008971 |
| 0.008177 | AM_not_in_group | 0.019163 |
| 0.008223 | AM_not_in_group | 0.000242 |
| 0.001155 | AM_not_in_group | 0.003477 |
| 0.022528 | AM_not_in_group | 0.009286 |
| 0.022528 | AM_not_in_group | 0.009286 |
| 0.022528 | AM_not_in_group | 0.009286 |

diffusion\_prioritization\_ALL

|          |                 |          |
|----------|-----------------|----------|
| 0.022528 | AM_not_in_group | 0.009286 |
| 0.022528 | AM_not_in_group | 0.009286 |
| 0.02692  | AM_not_in_group | 0.000281 |
| 0.002798 | AM_not_in_group | 0.000366 |
| 0.002798 | AM_not_in_group | 0.000366 |
| 0.002798 | AM_not_in_group | 0.000366 |
| 0.001152 | AM_not_in_group | 0.000585 |
| 0.001565 | AM_not_in_group | 0.001165 |
| 0.03358  | AM_not_in_group | 0.007884 |
| 0.021701 | AM_not_in_group | 0.010325 |
| 0.104972 | AM_not_in_group | 0.003287 |
| 0.000136 | AM_not_in_group | 0.000012 |
| 0.050533 | AM_not_in_group | 0.000047 |
| 0.050533 | AM_not_in_group | 0.000047 |
| 1        | AM_not_in_group | 0.000047 |
| 0.050533 | AM_not_in_group | 0.000047 |
| 0.001765 | AM_not_in_group | 0.001448 |
| 0.000277 | AM_not_in_group | 0.010643 |
| 0.008685 | AM_not_in_group | 0.000243 |
| 0.001021 | AM_not_in_group | 0.002594 |
| 0.001021 | AM_not_in_group | 0.002594 |
| 0.001021 | AM_not_in_group | 0.002594 |
| 0.001528 | AM_not_in_group | 0.003928 |
| 0.000875 | AM_not_in_group | 0.000213 |
| 0.000659 | AM_not_in_group | 0.000427 |
| 0.001471 | AM_not_in_group | 0.000458 |
| 0.001471 | AM_not_in_group | 0.000458 |
| 0.001471 | AM_not_in_group | 0.000458 |

## diffusion\_prioritization\_ALL

|          |                 |          |
|----------|-----------------|----------|
| 0.001471 | AM_not_in_group | 0.000458 |
| 0.000552 | AM_not_in_group | 0.000261 |
| 0.007906 | AM_not_in_group | 0.000486 |
| 0.002966 | AM_not_in_group | 0.000214 |
| 0.068669 | AM_not_in_group | 0.000064 |
| 0.016065 | AM_not_in_group | 0.012077 |
| 0.043127 | AM_not_in_group | 0.000498 |
| 0.043127 | AM_not_in_group | 0.000498 |
| 0.043127 | AM_not_in_group | 0.000498 |
| 0.000415 | AM_not_in_group | 0.00082  |
| 0.014933 | AM_not_in_group | 0.007987 |
| 0.001077 | AM_not_in_group | 0.000087 |
| 0.022358 | AM_not_in_group | 0.008706 |
| 0.000383 | AM_not_in_group | 0.000069 |
| 0.020715 | AM_not_in_group | 0.004505 |
| 0.001525 | AM_not_in_group | 0.000572 |
| 0.001158 | AM_not_in_group | 0.000051 |
| 0.020754 | AM_not_in_group | 0.046909 |
| 0.02305  | AM_not_in_group | 0.007377 |
| 0.001443 | AM_not_in_group | 0.000714 |
| 0.001443 | AM_not_in_group | 0.000714 |
| 0.00019  | AM_not_in_group | 0.00023  |
| 0.005902 | AM_not_in_group | 0.003176 |
| 0.050209 | AM_not_in_group | 0.008789 |
| 0.002741 | AM_not_in_group | 0.000705 |
| 0.001066 | AM_not_in_group | 0.00321  |
| 0.001066 | AM_not_in_group | 0.00321  |
| 0.001568 | AM_not_in_group | 0.000113 |
| 0.006597 | AM_not_in_group | 0.004443 |
| 0.006597 | AM_not_in_group | 0.004443 |
| 0.00934  | AM_not_in_group | 0.00079  |
| 0.030553 | AM_not_in_group | 0.008414 |
| 0.030553 | AM_not_in_group | 0.008414 |
| 0.030553 | AM_not_in_group | 0.008414 |
| 0.001185 | AM_not_in_group | 0.010344 |

diffusion\_prioritization\_ALL

|          |                 |          |
|----------|-----------------|----------|
| 0.001318 | AM_not_in_group | 0.000203 |
| 0.002255 | AM_not_in_group | 0.001222 |
| 0.005003 | AM_not_in_group | 0.000606 |
| 0.009259 | AM_not_in_group | 0.062326 |
| 0.000514 | AM_not_in_group | 0.000069 |
| 0.081614 | AM_not_in_group | 0.013682 |
| 0.001006 | AM_not_in_group | 0.000212 |
| 0.001006 | AM_not_in_group | 0.000212 |
| 0.0002   | AM_not_in_group | 0.000041 |
| 0.0002   | AM_not_in_group | 0.000041 |
| 0.0002   | AM_not_in_group | 0.000041 |
| 0.001276 | AM_not_in_group | 0.000165 |
| 0.001506 | AM_not_in_group | 0.000157 |
| 0.09466  | AM_in_group     | 1        |
| 0.00041  | AM_not_in_group | 0.000374 |
| 0.055457 | AM_not_in_group | 0.004988 |
| 0.000132 | AM_not_in_group | 0.000167 |
| 0.011958 | AM_not_in_group | 0.000018 |
| 0.011958 | AM_not_in_group | 0.000018 |
| 0.000175 | AM_not_in_group | 0.00012  |
| 0.002013 | AM_not_in_group | 0.000687 |
| 0.000835 | AM_not_in_group | 0.000106 |
| 0.000835 | AM_not_in_group | 0.000106 |
| 1        | AM_not_in_group | 0.011193 |
| 0.044255 | AM_not_in_group | 0.00003  |
| 0.019356 | AM_not_in_group | 0.006457 |
| 0.00917  | AM_not_in_group | 0.009634 |
| 0.0001   | AM_not_in_group | 0.003288 |
| 0.001473 | AM_not_in_group | 0.000658 |
| 0.01269  | AM_not_in_group | 0.003938 |
| 0.01269  | AM_not_in_group | 0.003938 |
| 0.022139 | AM_not_in_group | 0.008581 |
| 0.022139 | AM_not_in_group | 0.008581 |
| 1        | AM_not_in_group | 0.008581 |
| 0.000694 | AM_not_in_group | 0.000183 |
| 0.001496 | AM_not_in_group | 0.000276 |
| 0.001496 | AM_not_in_group | 0.000276 |
| 0.001496 | AM_not_in_group | 0.000276 |
| 0.008834 | AM_not_in_group | 0.005467 |
| 0.016345 | AM_not_in_group | 0.00762  |
| 0.00195  | AM_not_in_group | 0.001472 |

diffusion\_prioritization\_ALL

|          |                 |          |
|----------|-----------------|----------|
| 0.00195  | AM_not_in_group | 0.001472 |
| 0.011049 | AM_not_in_group | 0.001972 |
| 0.00126  | AM_not_in_group | 0.000383 |
| 0.000232 | AM_not_in_group | 0.000232 |
| 0.001848 | AM_not_in_group | 0.000827 |
| 0.000361 | AM_not_in_group | 0.000094 |
| 0.001196 | AM_not_in_group | 0.000362 |
| 0.104133 | AM_not_in_group | 0.000332 |
| 0.00894  | AM_not_in_group | 0.000218 |
| 0.011519 | AM_not_in_group | 0.000017 |
| 0.000834 | AM_not_in_group | 0.000248 |
| 0.003587 | AM_not_in_group | 0.000923 |
| 0.013928 | AM_not_in_group | 0.000546 |
| 0.001057 | AM_not_in_group | 0.000286 |
| 0.033148 | AM_not_in_group | 0.002818 |
| 0.015392 | AM_not_in_group | 0.00008  |
| 0.00109  | AM_not_in_group | 0.000488 |
| 0.016697 | AM_not_in_group | 0.010047 |
| 0.0778   | AM_not_in_group | 0.020287 |
| 0.016423 | AM_not_in_group | 0.000019 |
| 0.031952 | AM_not_in_group | 0.000351 |
| 0.015616 | AM_not_in_group | 0.010136 |
| 1        | AM_not_in_group | 0.010136 |
| 0.015616 | AM_not_in_group | 0.010136 |
| 0.015616 | AM_not_in_group | 0.010136 |
| 0.105683 | AM_not_in_group | 0.001196 |
| 0.000194 | AM_not_in_group | 0.000043 |
| 0.00134  | AM_not_in_group | 0.000354 |
| 0.126249 | AM_not_in_group | 0.001101 |
| 0.000058 | AM_not_in_group | 0.000185 |
| 0.036662 | AM_not_in_group | 0.02535  |
| 0.000667 | AM_not_in_group | 0.000167 |
| 0.044095 | AM_not_in_group | 0.000992 |
| 0.024624 | AM_not_in_group | 0.008048 |
| 0.022629 | AM_not_in_group | 0.004646 |
| 0.004597 | AM_not_in_group | 0.005755 |
| 0.016181 | AM_not_in_group | 0.051273 |
| 0.019316 | AM_not_in_group | 0.003162 |
| 0.000233 | AM_not_in_group | 0.000251 |
| 0.117769 | AM_not_in_group | 0.000887 |
| 0.000758 | AM_not_in_group | 0.000218 |
| 0.000758 | AM_not_in_group | 0.000218 |

## diffusion\_prioritization\_ALL

|          |                 |          |
|----------|-----------------|----------|
| 0.000758 | AM_not_in_group | 0.000218 |
| 0.003624 | AM_not_in_group | 0.004466 |
| 0.034471 | AM_not_in_group | 0.005179 |
| 0.001672 | AM_not_in_group | 0.001256 |
| 0.013162 | AM_not_in_group | 0.002502 |
| 0.08552  | AM_not_in_group | 0.086905 |
| 0.001157 | AM_not_in_group | 0.000477 |
| 0.053238 | AM_not_in_group | 0.013983 |
| 0.025877 | AM_not_in_group | 0.000081 |
| 0.001246 | AM_not_in_group | 0.000264 |
| 0.003145 | AM_not_in_group | 0.000951 |
| 0.007483 | AM_not_in_group | 0.001864 |
| 0.002332 | AM_not_in_group | 0.001472 |
| 0.002332 | AM_not_in_group | 0.001472 |
| 0.00002  | AM_not_in_group | 0.000034 |
| 0.018335 | AM_not_in_group | 0.002452 |
| 0.009384 | AM_not_in_group | 0.002754 |
| 0.002007 | AM_not_in_group | 0.000553 |
| 0.029698 | AM_not_in_group | 0.001719 |
| 0.063369 | AM_not_in_group | 0.06147  |
| 0.002947 | AM_not_in_group | 0.000871 |
| 0.016365 | AM_not_in_group | 0.07805  |
| 0.007183 | AM_not_in_group | 0.004822 |
| 0.006535 | AM_not_in_group | 0.00452  |
| 0.023303 | AM_not_in_group | 0.006613 |
| 0.000174 | AM_not_in_group | 0.000076 |
| 0.033205 | AM_not_in_group | 0.009796 |
| 0.000053 | AM_not_in_group | 0.000171 |
| 0.000503 | AM_not_in_group | 0.001318 |
| 0.016363 | AM_not_in_group | 0.002511 |
| 0.001715 | AM_not_in_group | 0.001107 |

diffusion\_prioritization\_ALL

|          |                 |          |
|----------|-----------------|----------|
| 0.00892  | AM_not_in_group | 0.000286 |
| 0.006101 | AM_not_in_group | 0.000064 |
| 0.015897 | AM_not_in_group | 0.008545 |
| 0.00833  | AM_not_in_group | 0.000243 |
| 0.021222 | AM_not_in_group | 0.015604 |
| 0.162936 | AM_in_group     | 1        |
| 0.015699 | AM_not_in_group | 0.000207 |
| 0.00005  | AM_not_in_group | 0.0001   |
| 0.000511 | AM_not_in_group | 0.000977 |
| 0.013779 | AM_not_in_group | 0.002425 |
| 0.02819  | AM_not_in_group | 0.003809 |
| 0.00041  | AM_not_in_group | 0.000114 |
| 0.010784 | AM_not_in_group | 0.000694 |
| 0.000426 | AM_not_in_group | 0.000129 |
| 0.001488 | AM_not_in_group | 0.000526 |
| 0.000265 | AM_not_in_group | 0.000584 |
| 0.017443 | AM_not_in_group | 0.1497   |
| 0.001159 | AM_not_in_group | 0.00036  |
| 0.240324 | AM_not_in_group | 0.126052 |
| 0.000161 | AM_not_in_group | 0.000877 |
| 0.000381 | AM_not_in_group | 0.001224 |
| 0.001755 | AM_not_in_group | 0.002556 |
| 0.000663 | AM_not_in_group | 0.000206 |
| 0.000663 | AM_not_in_group | 0.000206 |
| 0.026071 | AM_not_in_group | 0.004554 |
| 0.008277 | AM_not_in_group | 0.004597 |
| 0.000343 | AM_not_in_group | 0.000416 |
| 0.129428 | AM_not_in_group | 0.000082 |
| 0.000453 | AM_not_in_group | 0.000195 |
| 0.013025 | AM_not_in_group | 0.000768 |
| 0.010447 | AM_not_in_group | 0.000034 |
| 0.000655 | AM_not_in_group | 0.000484 |
| 0.024636 | AM_not_in_group | 0.000751 |
| 0.002204 | AM_not_in_group | 0.000751 |
| 0.022501 | AM_not_in_group | 0.008721 |



## diffusion\_prioritization\_ALL

|          |                 |          |
|----------|-----------------|----------|
| 0.001388 | AM_not_in_group | 0.002046 |
| 0.000045 | AM_not_in_group | 0.000006 |
| 0.000064 | AM_not_in_group | 0.000057 |
| 1        | AM_not_in_group | 0.000339 |
| 0.032438 | AM_not_in_group | 0.000339 |
| 0.037906 | AM_not_in_group | 0.000255 |
| 0.037906 | AM_not_in_group | 0.000255 |
| 0.000141 | AM_not_in_group | 0.000192 |
| 0.023973 | AM_not_in_group | 0.00857  |
| 0.023973 | AM_not_in_group | 0.00857  |
| 0.001017 | AM_not_in_group | 0.00063  |
| 0.023263 | AM_not_in_group | 0.008106 |
| 0.001316 | AM_not_in_group | 0.000232 |
| 0.020855 | AM_not_in_group | 0.006857 |
| 0.02519  | AM_not_in_group | 0.000194 |
| 0.037534 | AM_not_in_group | 0.021148 |
| 0.075714 | AM_not_in_group | 0.075674 |
| 0.00339  | AM_not_in_group | 0.006675 |
| 0.000018 | AM_not_in_group | 0.000031 |
| 0.001669 | AM_not_in_group | 0.000754 |
| 0.015483 | AM_not_in_group | 0.009457 |
| 0.001652 | AM_not_in_group | 0.000136 |

diffusion\_prioritization\_ALL

|          |                 |          |
|----------|-----------------|----------|
| 0.001652 | AM_not_in_group | 0.000136 |
| 0.010891 | AM_not_in_group | 0.010548 |
| 0.019083 | AM_in_group     | 1        |
| 0.019083 | AM_not_in_group | 0.008946 |
| 0.089913 | AM_not_in_group | 0.000112 |
| 0.00577  | AM_not_in_group | 0.006873 |
| 0.005632 | AM_not_in_group | 0.000059 |
| 0.005632 | AM_not_in_group | 0.000059 |
| 0.005632 | AM_not_in_group | 0.000059 |
| 0.001263 | AM_not_in_group | 0.001329 |
| 0.010199 | AM_not_in_group | 0.009554 |
| 0.000251 | AM_not_in_group | 0.000229 |
| 0.000251 | AM_not_in_group | 0.000229 |
| 0.037241 | AM_not_in_group | 0.000108 |
| 0.004009 | AM_not_in_group | 0.000891 |
| 0.000149 | AM_not_in_group | 0.000809 |
| 0.002451 | AM_not_in_group | 0.000634 |
| 0.00839  | AM_not_in_group | 0.002659 |
| 0.010029 | AM_not_in_group | 0.009277 |
| 0.000505 | AM_not_in_group | 0.020525 |
| 0.000764 | AM_not_in_group | 0.000233 |
| 0.013898 | AM_not_in_group | 0.003183 |
| 0.002828 | AM_not_in_group | 0.018833 |
| 0.000422 | AM_not_in_group | 0.000181 |
| 0.000091 | AM_not_in_group | 0.000192 |
| 0.000008 | AM_not_in_group | 0.000002 |
| 0.021281 | AM_not_in_group | 0.108861 |
| 0.002445 | AM_not_in_group | 0.026177 |
| 0.08729  | AM_not_in_group | 0.00086  |
| 0.035158 | AM_not_in_group | 0.004631 |
| 0.000044 | AM_not_in_group | 0.000089 |
| 1        | AM_not_in_group | 0.000062 |
| 0.034382 | AM_not_in_group | 0.000062 |
| 0.059485 | AM_not_in_group | 0.00342  |
| 0.006215 | AM_not_in_group | 0.000833 |
| 0.006215 | AM_not_in_group | 0.000833 |
| 0.006215 | AM_not_in_group | 0.000833 |
| 0.026416 | AM_not_in_group | 0.001488 |
| 0.026416 | AM_not_in_group | 0.001488 |

## diffusion\_prioritization\_ALL

|          |                 |          |
|----------|-----------------|----------|
| 0.001791 | AM_not_in_group | 0.029181 |
| 0.002873 | AM_not_in_group | 0.001104 |
| 0.000059 | AM_not_in_group | 0.000053 |
| 0.002858 | AM_not_in_group | 0.001683 |
| 0.000783 | AM_not_in_group | 0.000014 |
| 0.000548 | AM_not_in_group | 0.000089 |
| 0.13646  | AM_not_in_group | 0.000073 |
| 0.13646  | AM_not_in_group | 0.000073 |
| 1        | AM_not_in_group | 0.000073 |
| 0.13646  | AM_not_in_group | 0.000073 |
| 1        | AM_not_in_group | 0.000073 |
| 0.13646  | AM_not_in_group | 0.000073 |
| 0.000165 | AM_not_in_group | 0.002567 |
| 0.001339 | AM_not_in_group | 0.000423 |
| 0.00044  | AM_not_in_group | 0.000477 |
| 0.00044  | AM_not_in_group | 0.000477 |
| 0.002282 | AM_not_in_group | 0.000135 |
| 0.000078 | AM_not_in_group | 0.000036 |
| 0.024776 | AM_not_in_group | 0.006495 |
| 0.027474 | AM_not_in_group | 0.000141 |
| 0.031088 | AM_not_in_group | 0.004622 |
| 0.000209 | AM_not_in_group | 0.000273 |
| 0.000344 | AM_not_in_group | 0.000031 |
| 0.016975 | AM_not_in_group | 0.007764 |
| 0.016975 | AM_not_in_group | 0.007764 |
| 0.00239  | AM_not_in_group | 0.002295 |
| 0.001097 | AM_not_in_group | 0.000292 |
| 0.015502 | AM_not_in_group | 0.001914 |
| 0.01996  | AM_not_in_group | 0.01783  |
| 0.015818 | AM_not_in_group | 0.007953 |
| 0.02105  | AM_not_in_group | 0.016326 |
| 0.02105  | AM_not_in_group | 0.016326 |
| 0.028534 | AM_not_in_group | 0.049364 |
| 0.001985 | AM_not_in_group | 0.001071 |
| 0.001985 | AM_not_in_group | 0.001071 |

## diffusion\_prioritization\_ALL

|          |                 |          |
|----------|-----------------|----------|
| 0.001985 | AM_not_in_group | 0.001071 |
| 0.000207 | AM_not_in_group | 0.000206 |
| 0.015409 | AM_not_in_group | 0.000184 |
| 0.006456 | AM_not_in_group | 0.005179 |
| 0.006456 | AM_not_in_group | 0.005179 |
| 1        | AM_not_in_group | 0.000128 |
| 0.03438  | AM_not_in_group | 0.000099 |
| 0.011624 | AM_not_in_group | 0.003578 |
| 0.014474 | AM_not_in_group | 0.005979 |
| 0.001813 | AM_not_in_group | 0.000062 |
| 0.000465 | AM_not_in_group | 0.044492 |
| 0.01164  | AM_not_in_group | 0.000723 |
| 0.000146 | AM_not_in_group | 0.000042 |
| 0.003667 | AM_not_in_group | 0.000817 |
| 0.001499 | AM_not_in_group | 0.000479 |
| 0.001499 | AM_not_in_group | 0.000479 |
| 0.001499 | AM_not_in_group | 0.000479 |
| 0.038516 | AM_not_in_group | 0.000479 |
| 0.000087 | AM_not_in_group | 0.000008 |
| 0.007015 | AM_not_in_group | 0.00289  |
| 0.000047 | AM_not_in_group | 0.000081 |
| 0.000074 | AM_not_in_group | 0.000022 |
| 0.001983 | AM_not_in_group | 0.000375 |
| 0.005544 | AM_not_in_group | 0.000155 |
| 0.00581  | AM_not_in_group | 0.00056  |
| 0.005631 | AM_not_in_group | 0.001584 |
| 0.000371 | AM_not_in_group | 0.000256 |
| 0.032972 | AM_not_in_group | 0.000265 |
| 0.008469 | AM_not_in_group | 0.002092 |
| 0.008469 | AM_not_in_group | 0.002092 |
| 0.008469 | AM_not_in_group | 0.002092 |
| 1        | AM_not_in_group | 0.002092 |
| 0.008469 | AM_not_in_group | 0.002092 |

## diffusion\_prioritization\_ALL

|          |                 |          |
|----------|-----------------|----------|
| 0.008469 | AM_not_in_group | 0.002092 |
| 0.001203 | AM_not_in_group | 0.000252 |
| 0.000668 | AM_not_in_group | 0.000049 |
| 0.000957 | AM_not_in_group | 0.002631 |
| 0.000875 | AM_not_in_group | 0.000268 |
| 0.000473 | AM_not_in_group | 0.000111 |
| 0.000699 | AM_not_in_group | 0.000307 |
| 0.019536 | AM_not_in_group | 0.013721 |
| 0.024126 | AM_not_in_group | 0.002953 |
| 1        | AM_not_in_group | 0.002953 |
| 0.024126 | AM_not_in_group | 0.002953 |
| 0.024126 | AM_not_in_group | 0.002953 |
| 0.024126 | AM_not_in_group | 0.002953 |
| 1        | AM_not_in_group | 0.002953 |
| 0.024126 | AM_not_in_group | 0.002953 |
| 0.039077 | AM_not_in_group | 0.002337 |
| 0.000004 | AM_not_in_group | 0.000083 |
| 0.013623 | AM_not_in_group | 0.000089 |
| 0.013623 | AM_not_in_group | 0.000089 |
| 0.013623 | AM_not_in_group | 0.000089 |

diffusion\_prioritization\_ALL

|          |                 |          |
|----------|-----------------|----------|
| 0.013623 | AM_not_in_group | 0.000089 |
| 1        | AM_not_in_group | 0.000089 |
| 0.00068  | AM_not_in_group | 0.002049 |
| 1        | AM_not_in_group | 0.019861 |
| 0.029557 | AM_not_in_group | 0.019861 |
| 0.029557 | AM_not_in_group | 0.019861 |
| 0.000433 | AM_in_group     | 1        |
| 0.000433 | AM_not_in_group | 0.041385 |
| 0.11207  | AM_not_in_group | 0.000292 |
| 0.022866 | AM_not_in_group | 0.003102 |
| 0.006037 | AM_not_in_group | 0.002553 |
| 0.018572 | AM_not_in_group | 0.000169 |
| 0.001435 | AM_not_in_group | 0.0326   |
| 0.018497 | AM_not_in_group | 0.136164 |
| 0.005726 | AM_not_in_group | 0.004465 |
| 0.01212  | AM_not_in_group | 0.004207 |
| 0.001754 | AM_not_in_group | 0.001227 |
| 0.001754 | AM_not_in_group | 0.001227 |
| 0.001754 | AM_not_in_group | 0.001227 |

diffusion\_prioritization\_ALL

|          |                 |          |
|----------|-----------------|----------|
| 0.001754 | AM_not_in_group | 0.001227 |
| 0.001754 | AM_not_in_group | 0.001227 |
| 0.001754 | AM_not_in_group | 0.001227 |
| 0.012066 | AM_not_in_group | 0.09385  |
| 0.011152 | AM_not_in_group | 0.001366 |
| 0.064911 | AM_not_in_group | 0.000206 |
| 0.055627 | AM_not_in_group | 0.024029 |
| 0.001498 | AM_not_in_group | 0.002239 |
| 0.010182 | AM_not_in_group | 0.003982 |
| 0.001293 | AM_not_in_group | 0.000332 |
| 0.005952 | AM_not_in_group | 0.0018   |
| 0.000666 | AM_not_in_group | 0.000278 |
| 0.001973 | AM_not_in_group | 0.000049 |
| 0.000388 | AM_not_in_group | 0.000252 |
| 0.001342 | AM_not_in_group | 0.03023  |
| 0.023085 | AM_not_in_group | 0.008375 |
| 0.013559 | AM_not_in_group | 0.001949 |
| 0.013559 | AM_not_in_group | 0.001949 |
| 0.013559 | AM_not_in_group | 0.001949 |
| 0.033308 | AM_not_in_group | 0.072305 |
| 0.000515 | AM_not_in_group | 0.00194  |
| 0.015074 | AM_not_in_group | 0.004465 |
| 0.005816 | AM_not_in_group | 0.002459 |
| 0.003318 | AM_not_in_group | 0.001262 |
| 0.111081 | AM_not_in_group | 0.000179 |
| 0.00178  | AM_not_in_group | 0.000992 |
| 0.000739 | AM_not_in_group | 0.000152 |
| 0.000478 | AM_not_in_group | 0.000086 |
| 0.003467 | AM_not_in_group | 0.000883 |
| 0.003467 | AM_not_in_group | 0.000883 |
| 0.001905 | AM_not_in_group | 0.000593 |
| 0.000793 | AM_not_in_group | 0.000432 |
| 0.01462  | AM_not_in_group | 0.006672 |
| 0.003683 | AM_not_in_group | 0.000827 |
| 0.000493 | AM_not_in_group | 0.008321 |

diffusion\_prioritization\_ALL

|          |                 |          |
|----------|-----------------|----------|
| 0.000493 | AM_not_in_group | 0.008321 |
| 0.025093 | AM_not_in_group | 0.015669 |
| 0.018178 | AM_not_in_group | 0.014098 |
| 0.017158 | AM_not_in_group | 0.009029 |
| 0.031432 | AM_not_in_group | 0.007251 |
| 0.031432 | AM_not_in_group | 0.007251 |
| 0.031432 | AM_not_in_group | 0.007251 |
| 1        | AM_not_in_group | 0.007251 |
| 0.031432 | AM_not_in_group | 0.007251 |
| 0.000004 | AM_not_in_group | 0.000077 |
| 0.000762 | AM_not_in_group | 0.005156 |
| 0.001534 | AM_not_in_group | 0.000411 |
| 0.055107 | AM_not_in_group | 0.153983 |
| 0.010807 | AM_not_in_group | 0.000396 |
| 0.002383 | AM_not_in_group | 0.000544 |
| 0.022671 | AM_not_in_group | 0.019097 |
| 0.009364 | AM_not_in_group | 0.001629 |
| 0.0389   | AM_not_in_group | 0.000197 |
| 0.007353 | AM_not_in_group | 0.000011 |
| 0.008518 | AM_not_in_group | 0.001756 |
| 0.001625 | AM_not_in_group | 0.001136 |
| 0.004519 | AM_not_in_group | 0.001512 |
| 0.000336 | AM_not_in_group | 0.002111 |
| 0.000336 | AM_not_in_group | 0.002111 |
| 0.03892  | AM_not_in_group | 0.114364 |
| 0.02989  | AM_in_group     | 1        |
| 0.005986 | AM_not_in_group | 0.10135  |
| 0.005986 | AM_not_in_group | 0.10135  |



## diffusion\_prioritization\_ALL

|          |                 |          |
|----------|-----------------|----------|
| 0.002185 | AM_not_in_group | 0.00032  |
| 0.067299 | AM_in_group     | 1        |
| 0.013521 | AM_not_in_group | 0.005354 |
| 0.002428 | AM_not_in_group | 0.003461 |
| 0.001401 | AM_not_in_group | 0.000066 |
| 0.001401 | AM_not_in_group | 0.000066 |
| 0.007633 | AM_not_in_group | 0.002032 |
| 0.010147 | AM_not_in_group | 0.007327 |
| 0.003715 | AM_not_in_group | 0.000837 |
| 0.003715 | AM_not_in_group | 0.000837 |
| 0.013847 | AM_not_in_group | 0.007528 |
| 0.000404 | AM_not_in_group | 0.000075 |
| 0.000764 | AM_in_group     | 1        |
| 0.000764 | AM_not_in_group | 0.026221 |
| 0.000312 | AM_not_in_group | 0.000177 |
| 0.107062 | AM_not_in_group | 0.013412 |
| 0.004032 | AM_not_in_group | 0.00183  |
| 0.012192 | AM_not_in_group | 0.005347 |
| 0.022501 | AM_not_in_group | 0.062989 |
| 0.022501 | AM_not_in_group | 0.062989 |
| 0.057617 | AM_not_in_group | 0.000111 |
| 1        | AM_not_in_group | 0.000111 |
| 0.020148 | AM_not_in_group | 0.008659 |
| 0.02021  | AM_not_in_group | 0.001453 |
| 0.001157 | AM_not_in_group | 0.000222 |
| 0.000809 | AM_not_in_group | 0.000603 |
| 0.000125 | AM_not_in_group | 0.000023 |

diffusion\_prioritization\_ALL

|          |                 |          |
|----------|-----------------|----------|
| 0.000125 | AM_not_in_group | 0.000023 |
| 0.027124 | AM_not_in_group | 0.000103 |
| 0.000558 | AM_not_in_group | 0.000737 |
| 0.001697 | AM_not_in_group | 0.000223 |
| 0.02675  | AM_not_in_group | 0.015993 |
| 0.012053 | AM_not_in_group | 0.050588 |
| 0.00095  | AM_not_in_group | 0.000419 |
| 0.007111 | AM_not_in_group | 0.004593 |
| 0.001416 | AM_not_in_group | 0.000379 |
| 0.001416 | AM_not_in_group | 0.000379 |
| 0.001416 | AM_not_in_group | 0.000379 |
| 0.006814 | AM_not_in_group | 0.00012  |
| 0.064758 | AM_not_in_group | 0.000997 |
| 0.000944 | AM_not_in_group | 0.000416 |
| 0.001218 | AM_not_in_group | 0.000442 |
| 0.021931 | AM_not_in_group | 0.029247 |
| 0.000201 | AM_not_in_group | 0.003169 |
| 0.005638 | AM_not_in_group | 0.008569 |
| 0.001803 | AM_not_in_group | 0.000515 |
| 0.000448 | AM_not_in_group | 0.001781 |
| 0.027123 | AM_not_in_group | 0.000382 |
| 0.052851 | AM_not_in_group | 0.068088 |
| 0.080607 | AM_not_in_group | 0.011778 |
| 0.061158 | AM_not_in_group | 0.000149 |

diffusion\_prioritization\_ALL

|          |                 |          |
|----------|-----------------|----------|
| 0.028518 | AM_not_in_group | 0.006524 |
| 0.00519  | AM_not_in_group | 0.001233 |
| 0.021166 | AM_not_in_group | 0.013835 |
| 0.016369 | AM_not_in_group | 0.018582 |
| 0.071015 | AM_not_in_group | 0.032224 |
| 0.000136 | AM_not_in_group | 0.000031 |
| 0.001006 | AM_not_in_group | 0.000423 |
| 0.047345 | AM_not_in_group | 0.000158 |
| 1        | AM_not_in_group | 0.115293 |
| 0.001525 | AM_not_in_group | 0.000822 |
| 0.028825 | AM_not_in_group | 0.000107 |
| 0.068414 | AM_not_in_group | 0.016534 |
| 0.128492 | AM_not_in_group | 0.000158 |
| 0.002049 | AM_not_in_group | 0.026123 |
| 0.009559 | AM_not_in_group | 0.000101 |
| 1        | AM_not_in_group | 0.019744 |
| 0.000034 | AM_not_in_group | 0.000109 |
| 0.001371 | AM_not_in_group | 0.000286 |
| 0.018101 | AM_not_in_group | 0.000224 |
| 1        | AM_not_in_group | 0.080492 |
| 0.000824 | AM_not_in_group | 0.002649 |
| 0.001188 | AM_not_in_group | 0.000227 |
| 0.000003 | AM_not_in_group | 0.000001 |
| 0.000003 | AM_not_in_group | 0.000001 |
| 0.000123 | AM_not_in_group | 0.000181 |
| 0.001057 | AM_not_in_group | 0.000257 |
| 0.003912 | AM_not_in_group | 0.002151 |
| 0.016431 | AM_not_in_group | 0.006241 |
| 0.000062 | AM_not_in_group | 0.000045 |
| 0.001389 | AM_not_in_group | 0.000363 |
| 0.009995 | AM_not_in_group | 0.07014  |
| 0.000285 | AM_not_in_group | 0.000153 |
| 0.001912 | AM_not_in_group | 0.001521 |
| 0.000018 | AM_not_in_group | 0.000004 |
| 0.006833 | AM_not_in_group | 0.029094 |
| 0.000689 | AM_not_in_group | 0.023634 |
| 0.003758 | AM_not_in_group | 0.008425 |
| 0.003758 | AM_not_in_group | 0.008425 |
| 0.003758 | AM_not_in_group | 0.008425 |
| 0.004625 | AM_not_in_group | 0.002014 |
| 0.001495 | AM_not_in_group | 0.000388 |
| 0.010895 | AM_not_in_group | 0.000211 |
| 0.000665 | AM_not_in_group | 0.000081 |
| 0.000665 | AM_not_in_group | 0.000081 |

diffusion\_prioritization\_ALL

|          |                 |          |
|----------|-----------------|----------|
| 0.000665 | AM_not_in_group | 0.000081 |
| 0.047413 | AM_not_in_group | 0.046028 |
| 0.000521 | AM_not_in_group | 0.000173 |
| 0.024878 | AM_not_in_group | 0.000195 |
| 0.001143 | AM_not_in_group | 0.002448 |
| 0.001217 | AM_not_in_group | 0.000474 |
| 0.000933 | AM_not_in_group | 0.000252 |
| 0.01053  | AM_not_in_group | 0.000132 |
| 0.013514 | AM_not_in_group | 0.012545 |
| 0.006418 | AM_not_in_group | 0.000734 |
| 0.001851 | AM_not_in_group | 0.014993 |
| 0.002167 | AM_not_in_group | 0.000713 |
| 0.000166 | AM_not_in_group | 0.001001 |
| 0.036567 | AM_not_in_group | 0.171787 |
| 0.0002   | AM_not_in_group | 0.000395 |
| 0.015741 | AM_not_in_group | 0.002435 |
| 0.000644 | AM_not_in_group | 0.000079 |
| 0.002539 | AM_not_in_group | 0.025423 |
| 0.077944 | AM_not_in_group | 0.008231 |
| 0.000005 | AM_not_in_group | 0.0001   |
| 0.003591 | AM_not_in_group | 0.008083 |
| 0.003591 | AM_not_in_group | 0.008083 |
| 0.001959 | AM_not_in_group | 0.031719 |
| 0.044194 | AM_not_in_group | 0.00024  |
| 0.012694 | AM_not_in_group | 0.001528 |
| 0.006418 | AM_not_in_group | 0.001584 |
| 0.001362 | AM_not_in_group | 0.000361 |

## diffusion\_prioritization\_ALL

|          |                 |          |
|----------|-----------------|----------|
| 0.00827  | AM_not_in_group | 0.001709 |
| 0.000011 | AM_not_in_group | 0.000019 |
| 0.001095 | AM_not_in_group | 0.002346 |
| 0.002213 | AM_not_in_group | 0.000053 |
| 0.004262 | AM_not_in_group | 0.001363 |
| 0.000256 | AM_not_in_group | 0.000034 |
| 0.003338 | AM_not_in_group | 0.009037 |
| 0.003338 | AM_not_in_group | 0.009037 |
| 0.003338 | AM_not_in_group | 0.009037 |
| 0.004126 | AM_not_in_group | 0.000242 |
| 0.01662  | AM_not_in_group | 0.001613 |
| 0.010412 | AM_not_in_group | 0.000231 |
| 0.003595 | AM_not_in_group | 0.000038 |
| 0.014609 | AM_not_in_group | 0.005509 |
| 0.007656 | AM_not_in_group | 0.000144 |
| 0.001579 | AM_not_in_group | 0.000451 |
| 0.001579 | AM_not_in_group | 0.000451 |
| 0.005552 | AM_not_in_group | 0.000048 |
| 0.000095 | AM_not_in_group | 0.000517 |
| 0.001651 | AM_not_in_group | 0.000238 |
| 0.001962 | AM_not_in_group | 0.007272 |
| 1        | AM_not_in_group | 0.00028  |
| 0.054954 | AM_not_in_group | 0.00028  |
| 0.000941 | AM_not_in_group | 0.000415 |

diffusion\_prioritization\_ALL

|          |                 |          |
|----------|-----------------|----------|
| 0.000053 | AM_not_in_group | 0.000049 |
| 0.012659 | AM_not_in_group | 0.022411 |
| 0.014043 | AM_not_in_group | 0.016564 |
| 0.021127 | AM_not_in_group | 0.000179 |
| 1        | AM_not_in_group | 0.000179 |
| 0.021127 | AM_not_in_group | 0.000179 |
| 0.021127 | AM_not_in_group | 0.000179 |
| 0.021127 | AM_not_in_group | 0.000179 |
| 0.007683 | AM_not_in_group | 0.000063 |
| 0.00679  | AM_not_in_group | 0.075157 |
| 0.010202 | AM_not_in_group | 0.154493 |
| 0.011905 | AM_in_group     | 1        |
| 0.008075 | AM_not_in_group | 0.007285 |
| 0.001041 | AM_not_in_group | 0.000183 |
| 0.000084 | AM_not_in_group | 0.000058 |
| 0.008979 | AM_not_in_group | 0.000988 |
| 0.000969 | AM_not_in_group | 0.000331 |
| 0.000037 | AM_not_in_group | 0.000034 |
| 0.009377 | AM_not_in_group | 0.032986 |
| 0.000153 | AM_not_in_group | 0.000924 |
| 0.000153 | AM_not_in_group | 0.000924 |
| 0.001844 | AM_not_in_group | 0.029855 |
| 0.021292 | AM_not_in_group | 0.000014 |
| 0.001726 | AM_not_in_group | 0.000642 |
| 0.001905 | AM_not_in_group | 0.000313 |
| 0.001987 | AM_not_in_group | 0.000659 |
| 0.001008 | AM_not_in_group | 0.000366 |
| 0.00348  | AM_not_in_group | 0.00031  |
| 0.025154 | AM_not_in_group | 0.000316 |
| 0.00174  | AM_not_in_group | 0.000301 |
| 0.000275 | AM_not_in_group | 0.000379 |
| 0.010271 | AM_not_in_group | 0.010312 |
| 0.008117 | AM_not_in_group | 0.00666  |
| 0.070605 | AM_not_in_group | 0.199453 |
| 0.000667 | AM_not_in_group | 0.006255 |
| 0.009777 | AM_in_group     | 1        |
| 0.009777 | AM_not_in_group | 0.009167 |
| 0.009777 | AM_not_in_group | 0.009167 |

diffusion\_prioritization\_ALL

|          |                 |          |
|----------|-----------------|----------|
| 0.009777 | AM_not_in_group | 0.009167 |
| 0.010717 | AM_not_in_group | 0.001458 |
| 0.003981 | AM_not_in_group | 0.001193 |
| 0.021945 | AM_not_in_group | 0.000063 |
| 0.012323 | AM_not_in_group | 0.001517 |
| 0.007504 | AM_not_in_group | 0.002776 |
| 0.000093 | AM_not_in_group | 0.000021 |
| 0.003428 | AM_not_in_group | 0.000372 |
| 0.000126 | AM_not_in_group | 0.000062 |
| 0.010165 | AM_not_in_group | 0.0095   |
| 0.010165 | AM_not_in_group | 0.0095   |
| 0.010165 | AM_not_in_group | 0.0095   |
| 0.020196 | AM_not_in_group | 0.013536 |
| 0.012438 | AM_not_in_group | 0.000247 |
| 0.006731 | AM_not_in_group | 0.07561  |
| 0.000449 | AM_not_in_group | 0.000036 |
| 0.000449 | AM_not_in_group | 0.000036 |
| 0.003372 | AM_not_in_group | 0.000294 |
| 0.0156   | AM_not_in_group | 0.008434 |
| 0.023736 | AM_not_in_group | 0.064119 |
| 1        | AM_not_in_group | 0.039527 |
| 0.001241 | AM_not_in_group | 0.001167 |
| 0.001767 | AM_not_in_group | 0.000968 |
| 0.002243 | AM_not_in_group | 0.000288 |
| 0.002243 | AM_not_in_group | 0.000288 |

diffusion\_prioritization\_ALL

|          |                 |          |
|----------|-----------------|----------|
| 0.031282 | AM_not_in_group | 0.009487 |
| 0.036708 | AM_not_in_group | 0.001347 |
| 0.039219 | AM_not_in_group | 0.010177 |
| 0.001328 | AM_not_in_group | 0.000229 |
| 0.017421 | AM_not_in_group | 0.01716  |
| 0.00368  | AM_not_in_group | 0.001807 |
| 0.00368  | AM_not_in_group | 0.001807 |
| 0.022072 | AM_not_in_group | 0.002444 |
| 0.021089 | AM_not_in_group | 0.001599 |
| 0.008586 | AM_not_in_group | 0.000937 |
| 0.005607 | AM_not_in_group | 0.002311 |
| 0.018883 | AM_not_in_group | 0.003912 |
| 0.017427 | AM_not_in_group | 0.013414 |
| 0.002721 | AM_not_in_group | 0.000613 |
| 0.06064  | AM_not_in_group | 0.000041 |
| 0.000254 | AM_not_in_group | 0.00035  |
| 0.000549 | AM_not_in_group | 0.000085 |
| 0.007426 | AM_not_in_group | 0.001831 |
| 0.002942 | AM_not_in_group | 0.002133 |
| 0.000954 | AM_not_in_group | 0.001884 |
| 0.000196 | AM_not_in_group | 0.000041 |
| 0.000874 | AM_not_in_group | 0.00014  |
| 0.012145 | AM_not_in_group | 0.002097 |
| 0.003851 | AM_not_in_group | 0.001461 |
| 0.001364 | AM_not_in_group | 0.000205 |
| 0.002202 | AM_not_in_group | 0.013473 |
| 0.009184 | AM_not_in_group | 0.003117 |
| 0.009184 | AM_not_in_group | 0.003117 |
| 0.009184 | AM_not_in_group | 0.003117 |
| 0.046579 | AM_not_in_group | 0.000043 |
| 0.046579 | AM_not_in_group | 0.000043 |
| 0.046579 | AM_not_in_group | 0.000043 |
| 1        | AM_not_in_group | 0.000043 |
| 1        | AM_not_in_group | 0.000043 |



diffusion\_prioritization\_ALL

|          |                 |          |
|----------|-----------------|----------|
| 0.046579 | AM_not_in_group | 0.000043 |
| 0.039441 | AM_not_in_group | 0.153301 |
| 0.00702  | AM_not_in_group | 0.01185  |
| 1        | AM_not_in_group | 0.025184 |
| 0.000099 | AM_not_in_group | 0.000027 |
| 0.000978 | AM_not_in_group | 0.000137 |
| 0.003791 | AM_not_in_group | 0.000558 |
| 0.018337 | AM_not_in_group | 0.05454  |
| 0.000523 | AM_not_in_group | 0.000064 |
| 0.000166 | AM_not_in_group | 0.000006 |
| 0.007306 | AM_not_in_group | 0.000282 |
| 0.001842 | AM_not_in_group | 0.000147 |
| 0.004805 | AM_not_in_group | 0.000102 |
| 0.016293 | AM_not_in_group | 0.000162 |
| 0.000585 | AM_not_in_group | 0.000144 |
| 0.012194 | AM_not_in_group | 0.02804  |
| 0.010009 | AM_not_in_group | 0.007244 |
| 0.0284   | AM_not_in_group | 0.036588 |
| 0.000759 | AM_not_in_group | 0.000107 |
| 0.003712 | AM_not_in_group | 0.00157  |
| 0.002023 | AM_not_in_group | 0.00442  |
| 0.002023 | AM_not_in_group | 0.00442  |
| 0.002023 | AM_not_in_group | 0.00442  |

## diffusion\_prioritization\_ALL

|          |                 |          |
|----------|-----------------|----------|
| 0.002023 | AM_not_in_group | 0.00442  |
| 0.000073 | AM_not_in_group | 0.000029 |
| 0.000209 | AM_not_in_group | 0.000073 |
| 0.001603 | AM_not_in_group | 0.000152 |
| 0.000411 | AM_not_in_group | 0.00235  |
| 0.003397 | AM_not_in_group | 0.001669 |
| 0.012344 | AM_not_in_group | 0.004153 |
| 0.126623 | AM_not_in_group | 0.000016 |
| 0.012637 | AM_not_in_group | 0.006691 |
| 0.003532 | AM_not_in_group | 0.002101 |
| 0.002051 | AM_not_in_group | 0.000775 |
| 0.000159 | AM_not_in_group | 0.000006 |
| 0.008361 | AM_not_in_group | 0.000078 |
| 0.008361 | AM_not_in_group | 0.000078 |
| 0.001265 | AM_not_in_group | 0.000361 |
| 0.003982 | AM_not_in_group | 0.002212 |
| 0.007611 | AM_not_in_group | 0.032493 |
| 0.049065 | AM_not_in_group | 0.011231 |
| 0.002753 | AM_not_in_group | 0.002002 |
| 0.000002 | AM_not_in_group | 0.000049 |
| 0.011554 | AM_not_in_group | 0.002156 |
| 0.011554 | AM_not_in_group | 0.002156 |
| 0.002741 | AM_not_in_group | 0.001096 |
| 0.022198 | AM_not_in_group | 0.007397 |
| 0.000218 | AM_not_in_group | 0.000094 |
| 0.000218 | AM_not_in_group | 0.000094 |
| 0.003845 | AM_not_in_group | 0.007179 |
| 0.003845 | AM_not_in_group | 0.007179 |
| 0.000214 | AM_not_in_group | 0.000144 |
| 0.001834 | AM_not_in_group | 0.000291 |
| 0.001324 | AM_not_in_group | 0.000158 |
| 0.021773 | AM_not_in_group | 0.015422 |
| 0.021773 | AM_not_in_group | 0.015422 |
| 0.021773 | AM_not_in_group | 0.015422 |

## diffusion\_prioritization\_ALL

|          |                 |          |
|----------|-----------------|----------|
| 1        | AM_not_in_group | 0.015422 |
| 0.021773 | AM_not_in_group | 0.015422 |
| 0.001161 | AM_not_in_group | 0.004809 |
| 0.141016 | AM_not_in_group | 0.003367 |
| 0.000201 | AM_not_in_group | 0.000026 |
| 0.000079 | AM_not_in_group | 0.001565 |
| 0.011262 | AM_not_in_group | 0.00189  |
| 0.0022   | AM_not_in_group | 0.001184 |
| 0.07818  | AM_not_in_group | 0.198681 |
| 0.000396 | AM_not_in_group | 0.002264 |
| 0.018412 | AM_not_in_group | 0.02514  |
| 0.017528 | AM_not_in_group | 0.006717 |
| 0.003656 | AM_not_in_group | 0.000254 |
| 0.02322  | AM_not_in_group | 0.005363 |
| 0.000744 | AM_not_in_group | 0.002411 |
| 0.00204  | AM_not_in_group | 0.004518 |
| 0.016688 | AM_not_in_group | 0.029227 |
| 0.001067 | AM_not_in_group | 0.000573 |
| 0.000544 | AM_not_in_group | 0.000134 |
| 0.018058 | AM_not_in_group | 0.010175 |
| 0.11734  | AM_not_in_group | 0.000682 |
| 0.011177 | AM_not_in_group | 0.008668 |
| 0.004436 | AM_not_in_group | 0.000094 |
| 0.004436 | AM_not_in_group | 0.000094 |
| 0.004436 | AM_not_in_group | 0.000094 |

## diffusion\_prioritization\_ALL

|          |                 |          |
|----------|-----------------|----------|
| 0.004436 | AM_not_in_group | 0.000094 |
| 0.007412 | AM_not_in_group | 0.009835 |
| 0.03897  | AM_not_in_group | 0.018579 |
| 0.003561 | AM_not_in_group | 0.000184 |
| 0.022918 | AM_not_in_group | 0.004979 |
| 0.022918 | AM_not_in_group | 0.004979 |
| 0.000305 | AM_not_in_group | 0.000474 |
| 0.001956 | AM_not_in_group | 0.002539 |
| 0.003616 | AM_not_in_group | 0.00057  |
| 0.000703 | AM_not_in_group | 0.000294 |
| 0.008604 | AM_not_in_group | 0.001421 |
| 0.001469 | AM_not_in_group | 0.000311 |
| 0.00335  | AM_not_in_group | 0.000514 |
| 0.000528 | AM_not_in_group | 0.001128 |
| 0.002059 | AM_not_in_group | 0.006346 |
| 0.001107 | AM_not_in_group | 0.000384 |
| 0.004045 | AM_not_in_group | 0.012002 |
| 0.002089 | AM_not_in_group | 0.000912 |
| 0.004907 | AM_not_in_group | 0.004597 |
| 0.011276 | AM_not_in_group | 0.000814 |
| 0.001021 | AM_not_in_group | 0.000163 |
| 0.001768 | AM_not_in_group | 0.001992 |
| 0.011817 | AM_not_in_group | 0.011071 |
| 0.001719 | AM_not_in_group | 0.000273 |
| 0.002118 | AM_not_in_group | 0.006283 |
| 0.000697 | AM_not_in_group | 0.000523 |
| 0.000697 | AM_not_in_group | 0.000523 |
| 0.000612 | AM_not_in_group | 0.013006 |
| 0.001951 | AM_not_in_group | 0.003669 |
| 0.00037  | AM_not_in_group | 0.000578 |
| 0.000379 | AM_not_in_group | 0.002169 |

## diffusion\_prioritization\_ALL

|          |                 |          |
|----------|-----------------|----------|
| 0.000379 | AM_not_in_group | 0.002169 |
| 0.020389 | AM_not_in_group | 0.09497  |
| 0.000775 | AM_not_in_group | 0.000339 |
| 0.00221  | AM_not_in_group | 0.092658 |
| 0.012323 | AM_not_in_group | 0.010935 |
| 0.007214 | AM_not_in_group | 0.002406 |
| 0.022077 | AM_not_in_group | 0.004796 |
| 0.000969 | AM_not_in_group | 0.005438 |
| 0.026568 | AM_not_in_group | 0.011341 |
| 0.000904 | AM_not_in_group | 0.000242 |
| 0.008242 | AM_not_in_group | 0.012781 |
| 0.000259 | AM_not_in_group | 0.000068 |
| 0.000259 | AM_not_in_group | 0.000068 |
| 0.001072 | AM_not_in_group | 0.004439 |
| 0.004333 | AM_not_in_group | 0.000006 |
| 0.00927  | AM_not_in_group | 0.000062 |
| 0.01025  | AM_not_in_group | 0.00704  |

diffusion\_prioritization\_ALL

|          |                 |          |
|----------|-----------------|----------|
| 0.01025  | AM_not_in_group | 0.00704  |
| 0.000073 | AM_not_in_group | 0.000032 |
| 0.019839 | AM_not_in_group | 0.003584 |
| 0.000624 | AM_not_in_group | 0.000073 |
| 0.004528 | AM_not_in_group | 0.000101 |
| 0.001813 | AM_not_in_group | 0.00039  |
| 0.051955 | AM_not_in_group | 0.000224 |
| 1        | AM_not_in_group | 0.000224 |
| 0.051955 | AM_not_in_group | 0.000224 |
| 0.051955 | AM_not_in_group | 0.000224 |
| 0.019761 | AM_not_in_group | 0.01865  |
| 0.000311 | AM_not_in_group | 0.000092 |
| 0.000311 | AM_not_in_group | 0.000092 |
| 0.000311 | AM_not_in_group | 0.000092 |
| 0.011645 | AM_not_in_group | 0.01268  |
| 0.003688 | AM_not_in_group | 0.000305 |
| 0.006893 | AM_not_in_group | 0.000179 |
| 0.011858 | AM_not_in_group | 0.000216 |
| 0.000602 | AM_not_in_group | 0.000182 |
| 0.013807 | AM_not_in_group | 0.002586 |
| 0.000345 | AM_not_in_group | 0.000025 |
| 0.000251 | AM_not_in_group | 0.000066 |
| 0.016083 | AM_not_in_group | 0.013555 |
| 0.001923 | AM_not_in_group | 0.000248 |
| 0.001923 | AM_not_in_group | 0.000248 |
| 0.001923 | AM_not_in_group | 0.000248 |
| 0.011836 | AM_not_in_group | 0.006473 |
| 0.000499 | AM_not_in_group | 0.000132 |
| 0.000499 | AM_not_in_group | 0.000132 |
| 0.005007 | AM_not_in_group | 0.015091 |
| 0.003671 | AM_not_in_group | 0.008393 |
| 0.00871  | AM_not_in_group | 0.001087 |
| 0.000386 | AM_not_in_group | 0.001992 |
| 0.002786 | AM_not_in_group | 0.000598 |
| 0.025797 | AM_in_group     | 1        |
| 0.00019  | AM_not_in_group | 0.000084 |
| 0.000922 | AM_not_in_group | 0.000645 |
| 0.003649 | AM_in_group     | 1        |
| 0.003649 | AM_not_in_group | 0.008341 |

diffusion\_prioritization\_ALL

|          |                 |          |
|----------|-----------------|----------|
| 0.003649 | AM_not_in_group | 0.008341 |
| 0.07098  | AM_not_in_group | 0.000836 |
| 0.00515  | AM_not_in_group | 0.004706 |
| 0.007911 | AM_not_in_group | 0.002082 |
| 0.007911 | AM_not_in_group | 0.002082 |
| 0.000249 | AM_not_in_group | 0.000062 |
| 0.000249 | AM_not_in_group | 0.000062 |
| 0.000249 | AM_not_in_group | 0.000062 |
| 0.01041  | AM_not_in_group | 0.000751 |
| 1        | AM_not_in_group | 0.000751 |
| 0.01041  | AM_not_in_group | 0.000751 |
| 0.002219 | AM_not_in_group | 0.001712 |
| 0.000412 | AM_not_in_group | 0.00009  |
| 0.004737 | AM_not_in_group | 0.000419 |
| 0.000224 | AM_not_in_group | 0.021406 |
| 0.000224 | AM_not_in_group | 0.021406 |
| 0.008272 | AM_not_in_group | 0.000425 |
| 0.001369 | AM_not_in_group | 0.000247 |

diffusion\_prioritization\_ALL

|          |                 |          |
|----------|-----------------|----------|
| 0.001369 | AM_not_in_group | 0.000247 |
| 0.009725 | AM_not_in_group | 0.002545 |
| 0.000143 | AM_not_in_group | 0.000173 |
| 0.006935 | AM_not_in_group | 0.00008  |
| 0.006935 | AM_not_in_group | 0.00008  |
| 0.006935 | AM_not_in_group | 0.00008  |
| 0.0021   | AM_not_in_group | 0.000509 |
| 0.0021   | AM_not_in_group | 0.000509 |
| 0.0021   | AM_not_in_group | 0.000509 |
| 0.00166  | AM_not_in_group | 0.000463 |
| 0.016076 | AM_not_in_group | 0.008224 |
| 0.000394 | AM_not_in_group | 0.00176  |
| 0.004153 | AM_not_in_group | 0.00158  |
| 0.008936 | AM_not_in_group | 0.004845 |
| 0.033857 | AM_in_group     | 1        |
| 0.001664 | AM_not_in_group | 0.040927 |
| 0.000436 | AM_not_in_group | 0.014972 |
| 1        | AM_not_in_group | 0.357792 |
| 0.00191  | AM_not_in_group | 0.00112  |
| 0.000501 | AM_not_in_group | 0.000224 |
| 0.000501 | AM_not_in_group | 0.000224 |
| 0.103409 | AM_not_in_group | 0.04111  |
| 0.076849 | AM_not_in_group | 0.012611 |
| 0.013646 | AM_not_in_group | 0.012385 |
| 0.001751 | AM_not_in_group | 0.000636 |
| 0.002969 | AM_not_in_group | 0.000048 |
| 0.006805 | AM_not_in_group | 0.005385 |
| 0.001432 | AM_not_in_group | 0.000307 |
| 0.001432 | AM_not_in_group | 0.000307 |
| 0.001639 | AM_not_in_group | 0.000332 |
| 0.000128 | AM_not_in_group | 0.000089 |
| 0.00726  | AM_not_in_group | 0.002323 |
| 0.00726  | AM_not_in_group | 0.002323 |
| 0.00418  | AM_not_in_group | 0.000093 |
| 0.000321 | AM_not_in_group | 0.000023 |
| 0.000696 | AM_not_in_group | 0.000217 |
| 0.000966 | AM_not_in_group | 0.004001 |
| 0.009399 | AM_not_in_group | 0.006601 |



diffusion\_prioritization\_ALL

|          |                 |          |
|----------|-----------------|----------|
| 0.08772  | AM_not_in_group | 0.104448 |
| 0.020463 | AM_not_in_group | 0.003335 |
| 0.020463 | AM_not_in_group | 0.003335 |
| 0.001583 | AM_not_in_group | 0.000635 |
| 0.028894 | AM_not_in_group | 0.016928 |
| 0.049273 | AM_not_in_group | 0.077788 |
| 0.004643 | AM_not_in_group | 0.002241 |
| 0.001499 | AM_not_in_group | 0.000238 |
| 0.001244 | AM_not_in_group | 0.00041  |
| 0.002041 | AM_not_in_group | 0.024107 |
| 0.001376 | AM_not_in_group | 0.000454 |
| 0.020186 | AM_not_in_group | 0.008383 |
| 0.008813 | AM_not_in_group | 0.006257 |
| 1        | AM_not_in_group | 0.001462 |
| 0.024306 | AM_not_in_group | 0.014442 |
| 0.003266 | AM_not_in_group | 0.000126 |
| 0.047517 | AM_not_in_group | 0.000832 |
| 0.044394 | AM_not_in_group | 0.003332 |
| 0.007888 | AM_not_in_group | 0.000053 |
| 0.007888 | AM_not_in_group | 0.000053 |
| 0.001021 | AM_not_in_group | 0.000264 |
| 1        | AM_not_in_group | 0.009785 |
| 0.002081 | AM_not_in_group | 0.000272 |
| 0.002122 | AM_not_in_group | 0.000372 |
| 0.001955 | AM_not_in_group | 0.000656 |
| 0.026423 | AM_not_in_group | 0.011974 |
| 0.000524 | AM_not_in_group | 0.00094  |
| 0.007636 | AM_not_in_group | 0.000392 |
| 0.000003 | AM_not_in_group | 0.000001 |
| 0.000003 | AM_not_in_group | 0.000001 |
| 0.003353 | AM_not_in_group | 0.000636 |
| 0.003353 | AM_not_in_group | 0.000636 |
| 0.000287 | AM_not_in_group | 0.004697 |
| 0.006459 | AM_not_in_group | 0.001802 |
| 0.019259 | AM_not_in_group | 0.000357 |
| 0.010217 | AM_in_group     | 1        |
| 0.006662 | AM_not_in_group | 0.000084 |

diffusion\_prioritization\_ALL

|          |                 |          |
|----------|-----------------|----------|
| 0.017056 | AM_not_in_group | 0.011896 |
| 0.001536 | AM_not_in_group | 0.037782 |
| 0.00053  | AM_not_in_group | 0.000406 |
| 0.000759 | AM_not_in_group | 0.002144 |
| 0.004844 | AM_not_in_group | 0.000149 |
| 0.001256 | AM_not_in_group | 0.006492 |
| 0.143107 | AM_not_in_group | 0.000361 |
| 0.024991 | AM_in_group     | 1        |
| 0.024991 | AM_not_in_group | 0.074107 |
| 0.024991 | AM_not_in_group | 0.074107 |
| 0.024991 | AM_not_in_group | 0.074107 |
| 1        | AM_not_in_group | 0.074107 |
| 0.024991 | AM_not_in_group | 0.074107 |
| 1        | AM_not_in_group | 0.074107 |
| 0.024991 | AM_not_in_group | 0.074107 |
| 0.024991 | AM_not_in_group | 0.074107 |
| 0.024991 | AM_not_in_group | 0.074107 |



## diffusion\_prioritization\_ALL

|          |                 |          |
|----------|-----------------|----------|
| 0.011497 | AM_not_in_group | 0.013167 |
| 0.025242 | AM_not_in_group | 0.007506 |
| 0.000407 | AM_not_in_group | 0.00032  |
| 0.003655 | AM_not_in_group | 0.019965 |
| 0.005816 | AM_not_in_group | 0.006189 |
| 0.003855 | AM_not_in_group | 0.006504 |
| 0.00102  | AM_not_in_group | 0.003276 |
| 0.032804 | AM_in_group     | 1        |
| 0.003766 | AM_not_in_group | 0.000389 |
| 0.00174  | AM_not_in_group | 0.000189 |
| 0.000053 | AM_not_in_group | 0.000072 |
| 0.000053 | AM_not_in_group | 0.000072 |
| 0.000053 | AM_not_in_group | 0.000072 |
| 0.001384 | AM_not_in_group | 0.0001   |
| 0.000573 | AM_not_in_group | 0.00148  |
| 0.022916 | AM_not_in_group | 0.000182 |
| 0.002042 | AM_not_in_group | 0.000197 |
| 0.005173 | AM_not_in_group | 0.000006 |
| 0.021657 | AM_not_in_group | 0.001082 |
| 0.003118 | AM_not_in_group | 0.007128 |
| 0.095119 | AM_not_in_group | 0.005417 |
| 0.014713 | AM_not_in_group | 0.01231  |
| 0.002923 | AM_not_in_group | 0.001204 |
| 0.006526 | AM_not_in_group | 0.000624 |
| 0.006526 | AM_not_in_group | 0.000624 |
| 0.006526 | AM_not_in_group | 0.000624 |
| 0.010158 | AM_not_in_group | 0.001314 |
| 0.002406 | AM_not_in_group | 0.000043 |
| 0.003779 | AM_not_in_group | 0.000142 |
| 0.008571 | AM_not_in_group | 0.001853 |
| 0.006223 | AM_not_in_group | 0.001367 |
| 0.070772 | AM_not_in_group | 0.055591 |
| 0.070772 | AM_not_in_group | 0.055591 |
| 0.00001  | AM_not_in_group | 0.00019  |
| 0.002826 | AM_not_in_group | 0.00002  |
| 0.014893 | AM_not_in_group | 0.008694 |

diffusion\_prioritization\_ALL

|          |                 |          |
|----------|-----------------|----------|
| 0.024725 | AM_in_group     | 1        |
| 0.024725 | AM_not_in_group | 0.169073 |
| 0.000753 | AM_not_in_group | 0.000323 |
| 0.000416 | AM_not_in_group | 0.000187 |
| 0.001494 | AM_not_in_group | 0.000332 |
| 0.001494 | AM_not_in_group | 0.000332 |
| 1        | AM_not_in_group | 0.154776 |
| 0.055432 | AM_not_in_group | 0.154776 |
| 0.004471 | AM_not_in_group | 0.000138 |
| 0.00009  | AM_not_in_group | 0.000199 |
| 0.00009  | AM_not_in_group | 0.000199 |
| 0.00009  | AM_not_in_group | 0.000199 |
| 0.005145 | AM_not_in_group | 0.007973 |
| 0.013455 | AM_not_in_group | 0.000051 |
| 0.00767  | AM_not_in_group | 0.011174 |
| 0.001391 | AM_not_in_group | 0.001304 |
| 0.062916 | AM_not_in_group | 0.000832 |
| 0.005828 | AM_not_in_group | 0.004942 |
| 0.001399 | AM_not_in_group | 0.000169 |
| 0.008895 | AM_not_in_group | 0.001554 |
| 0.008242 | AM_not_in_group | 0.000082 |
| 0.008242 | AM_not_in_group | 0.000082 |
| 0.00139  | AM_not_in_group | 0.000168 |
| 0.000017 | AM_not_in_group | 0.000033 |
| 0.000017 | AM_not_in_group | 0.000033 |
| 0.000017 | AM_not_in_group | 0.000033 |
| 0.000311 | AM_not_in_group | 0.000084 |
| 0.001266 | AM_not_in_group | 0.000185 |
| 0.000421 | AM_not_in_group | 0.000331 |
| 0.003271 | AM_not_in_group | 0.00035  |
| 0.007276 | AM_not_in_group | 0.000055 |
| 0.000941 | AM_not_in_group | 0.003025 |
| 0.000941 | AM_not_in_group | 0.003025 |

diffusion\_prioritization\_ALL

|          |                 |          |
|----------|-----------------|----------|
| 0.000941 | AM_not_in_group | 0.003025 |
| 0.002634 | AM_not_in_group | 0.002086 |
| 0.000389 | AM_not_in_group | 0.00029  |
| 0.000389 | AM_not_in_group | 0.00029  |
| 0.021107 | AM_in_group     | 1        |
| 0.177758 | AM_in_group     | 1        |
| 0.031137 | AM_not_in_group | 0.000352 |
| 0.031137 | AM_not_in_group | 0.000352 |
| 0.04918  | AM_not_in_group | 0.001524 |
| 0.006651 | AM_not_in_group | 0.000342 |
| 0.001349 | AM_not_in_group | 0.000609 |
| 0.010201 | AM_not_in_group | 0.009033 |
| 0.017799 | AM_not_in_group | 0.011884 |
| 0.00022  | AM_not_in_group | 0.000053 |
| 0.312039 | AM_not_in_group | 0.067636 |
| 0.131746 | AM_not_in_group | 0.000339 |
| 0.000162 | AM_not_in_group | 0.000223 |
| 0.015709 | AM_not_in_group | 0.001873 |
| 1        | AM_not_in_group | 0.001873 |

diffusion\_prioritization\_ALL

|          |                 |          |
|----------|-----------------|----------|
| 0.00324  | AM_not_in_group | 0.006512 |
| 0.010368 | AM_not_in_group | 0.010579 |
| 0.013721 | AM_not_in_group | 0.003139 |
| 0.004888 | AM_not_in_group | 0.003391 |
| 0.012119 | AM_not_in_group | 0.003313 |
| 0.009994 | AM_not_in_group | 0.00885  |
| 0.009994 | AM_not_in_group | 0.00885  |
| 0.009994 | AM_not_in_group | 0.00885  |
| 0.000134 | AM_not_in_group | 0.000005 |
| 0.000112 | AM_not_in_group | 0.000385 |
| 0.029469 | AM_not_in_group | 0.002848 |
| 0.203975 | AM_not_in_group | 0.496424 |
| 0.001311 | AM_not_in_group | 0.031981 |
| 0.057937 | AM_not_in_group | 0.000019 |
| 0.001241 | AM_not_in_group | 0.027965 |
| 0.024008 | AM_not_in_group | 0.084664 |
| 0.034466 | AM_not_in_group | 0.021175 |
| 0.002249 | AM_not_in_group | 0.000387 |
| 0.001301 | AM_not_in_group | 0.002553 |
| 0.008211 | AM_not_in_group | 0.001434 |
| 0.008211 | AM_not_in_group | 0.001434 |
| 0.008211 | AM_not_in_group | 0.001434 |
| 0.008239 | AM_not_in_group | 0.000277 |
| 0.019979 | AM_not_in_group | 0.058412 |
| 0.019979 | AM_not_in_group | 0.058412 |
| 0.003123 | AM_in_group     | 1        |
| 0.003123 | AM_not_in_group | 0.011373 |
| 0.005726 | AM_not_in_group | 0.002721 |
| 0.00141  | AM_not_in_group | 0.000909 |
| 0.003231 | AM_not_in_group | 0.001666 |
| 0.000412 | AM_not_in_group | 0.000433 |
| 0.000412 | AM_not_in_group | 0.000433 |

## diffusion\_prioritization\_ALL

|          |                 |          |
|----------|-----------------|----------|
| 0.000412 | AM_not_in_group | 0.000433 |
| 0.000714 | AM_not_in_group | 0.000385 |
| 0.000456 | AM_not_in_group | 0.000329 |
| 0.003431 | AM_not_in_group | 0.000169 |
| 0.000325 | AM_not_in_group | 0.000201 |
| 0.002168 | AM_not_in_group | 0.001065 |
| 0.002168 | AM_not_in_group | 0.001065 |
| 0.000995 | AM_not_in_group | 0.004486 |
| 0.002937 | AM_not_in_group | 0.002052 |
| 0.012249 | AM_not_in_group | 0.000276 |
| 0.02727  | AM_in_group     | 1        |
| 1        | AM_not_in_group | 0.06383  |
| 0.02727  | AM_not_in_group | 0.06383  |
| 1        | AM_not_in_group | 0.06383  |
| 0.02727  | AM_not_in_group | 0.06383  |
| 0.006866 | AM_not_in_group | 0.001948 |
| 0.006866 | AM_not_in_group | 0.001948 |
| 0.006866 | AM_not_in_group | 0.001948 |
| 0.002356 | AM_not_in_group | 0.000057 |
| 0.000846 | AM_not_in_group | 0.000098 |
| 0.005137 | AM_not_in_group | 0.010141 |
| 0.014396 | AM_not_in_group | 0.011931 |
| 1        | AM_not_in_group | 0.011931 |
| 0.014396 | AM_not_in_group | 0.011931 |
| 0.014396 | AM_not_in_group | 0.011931 |
| 0.014396 | AM_not_in_group | 0.011931 |



## diffusion\_prioritization\_ALL

|          |                 |          |
|----------|-----------------|----------|
| 0.014396 | AM_not_in_group | 0.011931 |
| 0.000848 | AM_not_in_group | 0.002726 |
| 0.00244  | AM_not_in_group | 0.000017 |
| 0.000303 | AM_not_in_group | 0.000089 |
| 0.008912 | AM_not_in_group | 0.000062 |
| 0.008736 | AM_not_in_group | 0.000591 |
| 0.009227 | AM_not_in_group | 0.00817  |
| 0.027261 | AM_not_in_group | 0.053302 |
| 0.00406  | AM_not_in_group | 0.000715 |
| 0.00406  | AM_not_in_group | 0.000715 |
| 0.00406  | AM_not_in_group | 0.000715 |
| 0.014121 | AM_not_in_group | 0.036779 |
| 0.002855 | AM_not_in_group | 0.000453 |
| 0.014507 | AM_not_in_group | 0.000154 |
| 0.001817 | AM_not_in_group | 0.002165 |
| 0.008203 | AM_not_in_group | 0.007299 |
| 0.006893 | AM_in_group     | 1        |
| 0.006893 | AM_not_in_group | 0.050745 |
| 0.006893 | AM_not_in_group | 0.050745 |
| 0.020671 | AM_not_in_group | 0.001472 |
| 0.000647 | AM_not_in_group | 0.000515 |
| 0.000647 | AM_not_in_group | 0.000515 |
| 0.030168 | AM_not_in_group | 0.000367 |
| 0.001683 | AM_not_in_group | 0.002362 |
| 0.000561 | AM_not_in_group | 0.001345 |
| 0.019835 | AM_not_in_group | 0.069794 |
| 0.000943 | AM_not_in_group | 0.015261 |
| 0.021263 | AM_not_in_group | 0.000115 |
| 0.002831 | AM_not_in_group | 0.00006  |
| 0.00121  | AM_not_in_group | 0.029602 |
| 0.004924 | AM_not_in_group | 0.002034 |
| 0.004924 | AM_not_in_group | 0.002034 |
| 0.002607 | AM_not_in_group | 0.000765 |
| 0.001122 | AM_not_in_group | 0.001809 |
| 0.000005 | AM_not_in_group | 0.000009 |

diffusion\_prioritization\_ALL

|          |                 |          |
|----------|-----------------|----------|
| 0.000005 | AM_not_in_group | 0.000009 |
| 0.001211 | AM_not_in_group | 0.001517 |
| 0.019541 | AM_not_in_group | 0.003276 |
| 0.002117 | AM_not_in_group | 0.037754 |
| 0.005221 | AM_not_in_group | 0.038004 |
| 0.002187 | AM_not_in_group | 0.000925 |
| 0.000112 | AM_not_in_group | 0.000349 |
| 0.008888 | AM_not_in_group | 0.007871 |
| 0.058815 | AM_in_group     | 1        |
| 0.000707 | AM_not_in_group | 0.000093 |
| 0.013943 | AM_not_in_group | 0.001725 |
| 0.003905 | AM_not_in_group | 0.000687 |
| 0.023355 | AM_not_in_group | 0.000957 |
| 0.000242 | AM_not_in_group | 0.001385 |
| 0.0003   | AM_not_in_group | 0.000186 |
| 0.001228 | AM_not_in_group | 0.000071 |
| 0.000014 | AM_not_in_group | 0.000028 |
| 0.012958 | AM_not_in_group | 0.010784 |
| 0.01514  | AM_not_in_group | 0.000069 |
| 1        | AM_not_in_group | 0.002857 |
| 0.003662 | AM_not_in_group | 0.000959 |
| 0.013759 | AM_not_in_group | 0.013696 |
| 0.000128 | AM_in_group     | 1        |
| 0.000128 | AM_not_in_group | 0.014036 |
| 0.014092 | AM_not_in_group | 0.003061 |
| 0.000498 | AM_not_in_group | 0.000181 |
| 0.000078 | AM_not_in_group | 0.000029 |
| 0.000684 | AM_not_in_group | 0.002834 |
| 0.000365 | AM_not_in_group | 0.000187 |

## diffusion\_prioritization\_ALL

|          |                 |          |
|----------|-----------------|----------|
| 0.002839 | AM_not_in_group | 0.011841 |
| 0.007553 | AM_not_in_group | 0.007356 |
| 0.001284 | AM_not_in_group | 0.000282 |
| 0.094926 | AM_not_in_group | 0.006438 |
| 0.007022 | AM_not_in_group | 0.00913  |
| 0.001938 | AM_not_in_group | 0.001963 |
| 0.000403 | AM_not_in_group | 0.000047 |
| 0.024033 | AM_not_in_group | 0.066319 |
| 0.001131 | AM_not_in_group | 0.027784 |
| 0.004306 | AM_not_in_group | 0.000333 |
| 0.001729 | AM_not_in_group | 0.004608 |
| 0.019231 | AM_not_in_group | 0.018356 |
| 0.012053 | AM_not_in_group | 0.015735 |
| 0.000024 | AM_not_in_group | 0.000011 |
| 0.032986 | AM_not_in_group | 0.00179  |
| 0.005212 | AM_not_in_group | 0.00063  |
| 0.003058 | AM_not_in_group | 0.001703 |
| 0.000571 | AM_not_in_group | 0.000019 |
| 0.00006  | AM_not_in_group | 0.000172 |
| 0.000135 | AM_not_in_group | 0.000327 |
| 0.018177 | AM_not_in_group | 0.003047 |
| 1        | AM_not_in_group | 0.003047 |
| 0.018177 | AM_not_in_group | 0.003047 |
| 0.003905 | AM_not_in_group | 0.003204 |
| 0.001    | AM_not_in_group | 0.002335 |
| 0.002553 | AM_not_in_group | 0.000329 |
| 0.020294 | AM_not_in_group | 0.050515 |
| 0.011273 | AM_not_in_group | 0.008782 |
| 0.000589 | AM_not_in_group | 0.000412 |
| 0.001827 | AM_not_in_group | 0.004692 |

## diffusion\_prioritization\_ALL

|          |                 |          |
|----------|-----------------|----------|
| 0.001827 | AM_not_in_group | 0.004692 |
| 0.001827 | AM_not_in_group | 0.004692 |
| 0.001827 | AM_not_in_group | 0.004692 |
| 0.002716 | AM_not_in_group | 0.002671 |
| 0.006645 | AM_not_in_group | 0.00048  |
| 0.010284 | AM_not_in_group | 0.000067 |
| 1        | AM_not_in_group | 0.000067 |
| 0.002944 | AM_not_in_group | 0.002802 |
| 0.018291 | AM_not_in_group | 0.000486 |
| 0.004735 | AM_not_in_group | 0.002993 |
| 0.102971 | AM_not_in_group | 0.000259 |
| 0.007756 | AM_not_in_group | 0.005984 |
| 0.001833 | AM_not_in_group | 0.000575 |
| 0.04072  | AM_in_group     | 1        |
| 0.000476 | AM_not_in_group | 0.00102  |
| 0.000476 | AM_not_in_group | 0.00102  |
| 0.000476 | AM_not_in_group | 0.00102  |
| 0.000389 | AM_not_in_group | 0.000105 |
| 0.000389 | AM_not_in_group | 0.000105 |
| 0.01108  | AM_not_in_group | 0.002433 |
| 0.000023 | AM_not_in_group | 0.000011 |
| 0.013964 | AM_not_in_group | 0.000064 |
| 0.013964 | AM_not_in_group | 0.000064 |
| 0.001204 | AM_not_in_group | 0.002923 |
| 0.002407 | AM_not_in_group | 0.006175 |
| 0.001642 | AM_not_in_group | 0.001136 |
| 0.010926 | AM_not_in_group | 0.116981 |
| 0.00174  | AM_not_in_group | 0.002394 |

## diffusion\_prioritization\_ALL

|          |                 |          |
|----------|-----------------|----------|
| 0.00174  | AM_not_in_group | 0.002394 |
| 0.010936 | AM_not_in_group | 0.00993  |
| 0.00009  | AM_not_in_group | 0.00031  |
| 0.00593  | AM_not_in_group | 0.002298 |
| 0.000354 | AM_not_in_group | 0.000156 |
| 0.000268 | AM_not_in_group | 0.000033 |
| 0.002786 | AM_not_in_group | 0.002577 |
| 0.034854 | AM_not_in_group | 0.074725 |
| 0.001789 | AM_not_in_group | 0.001812 |



diffusion\_prioritization\_ALL

|          |                 |          |
|----------|-----------------|----------|
| 0.000844 | AM_not_in_group | 0.005944 |
| 0.002668 | AM_not_in_group | 0.000059 |
| 0.017661 | AM_not_in_group | 0.000648 |
| 0.002674 | AM_not_in_group | 0.00066  |
| 0.001179 | AM_not_in_group | 0.000842 |
| 0.000822 | AM_not_in_group | 0.005699 |
| 0.000414 | AM_not_in_group | 0.000504 |
| 0.000414 | AM_not_in_group | 0.000504 |
| 0.001609 | AM_not_in_group | 0.004412 |
| 0.001609 | AM_not_in_group | 0.004412 |
| 0.001609 | AM_not_in_group | 0.004412 |
| 0.00316  | AM_not_in_group | 0.000555 |
| 0.00316  | AM_not_in_group | 0.000555 |
| 0.001066 | AM_not_in_group | 0.001222 |
| 0.000411 | AM_not_in_group | 0.0005   |
| 0.026466 | AM_not_in_group | 0.012009 |
| 0.022546 | AM_not_in_group | 0.040619 |
| 0.029175 | AM_not_in_group | 0.00002  |
| 0.000858 | AM_not_in_group | 0.000245 |
| 0.000858 | AM_not_in_group | 0.000245 |
| 0.002693 | AM_not_in_group | 0.001204 |
| 0.000612 | AM_not_in_group | 0.002535 |
| 0.001589 | AM_not_in_group | 0.000507 |
| 0.004935 | AM_not_in_group | 0.004471 |
| 0.001436 | AM_not_in_group | 0.001917 |
| 0.001709 | AM_not_in_group | 0.000879 |

## diffusion\_prioritization\_ALL

|          |                 |          |
|----------|-----------------|----------|
| 0.001709 | AM_not_in_group | 0.000879 |
| 0.003241 | AM_not_in_group | 0.002066 |
| 0.017521 | AM_not_in_group | 0.007568 |
| 0.000671 | AM_not_in_group | 0.000164 |
| 0.00619  | AM_not_in_group | 0.000189 |
| 0.00619  | AM_not_in_group | 0.000189 |
| 0.00619  | AM_not_in_group | 0.000189 |
| 0.000459 | AM_not_in_group | 0.000906 |
| 0.000094 | AM_not_in_group | 0.00002  |
| 0.028804 | AM_not_in_group | 0.016548 |
| 0.001763 | AM_not_in_group | 0.004634 |
| 0.075955 | AM_not_in_group | 0.000085 |
| 0.001705 | AM_not_in_group | 0.000535 |



diffusion\_prioritization\_ALL

|          |                 |          |
|----------|-----------------|----------|
| 0.001705 | AM_not_in_group | 0.000535 |
| 0.001652 | AM_not_in_group | 0.002645 |
| 0.000076 | AM_not_in_group | 0.000018 |
| 0.000115 | AM_not_in_group | 0.000322 |
| 0.004874 | AM_not_in_group | 0.00025  |
| 0.003596 | AM_not_in_group | 0.004199 |
| 0.013985 | AM_not_in_group | 0.003047 |
| 0.010634 | AM_not_in_group | 0.00112  |
| 0.004251 | AM_in_group     | 1        |
| 0.004251 | AM_not_in_group | 0.064372 |
| 0.004251 | AM_not_in_group | 0.064372 |
| 0.020747 | AM_in_group     | 1        |
| 0.000262 | AM_not_in_group | 0.00131  |
| 0.014779 | AM_not_in_group | 0.002695 |
| 0.000981 | AM_not_in_group | 0.024116 |
| 0.007589 | AM_not_in_group | 0.002451 |
| 0.253181 | AM_in_group     | 1        |
| 0.000282 | AM_not_in_group | 0.000069 |
| 0.000282 | AM_not_in_group | 0.000069 |
| 0.0001   | AM_not_in_group | 0.000134 |
| 0.001205 | AM_not_in_group | 0.00129  |
| 0.000385 | AM_not_in_group | 0.000445 |
| 0.001133 | AM_not_in_group | 0.005578 |
| 0.029148 | AM_not_in_group | 0.000196 |
| 0.0028   | AM_not_in_group | 0.002747 |
| 0.00406  | AM_not_in_group | 0.000079 |
| 0.00406  | AM_not_in_group | 0.000079 |
| 0.09967  | AM_not_in_group | 0.002192 |
| 0.003327 | AM_not_in_group | 0.000975 |
| 0.043269 | AM_not_in_group | 0.000516 |
| 0.000684 | AM_not_in_group | 0.004279 |

diffusion\_prioritization\_ALL

|          |                 |          |
|----------|-----------------|----------|
| 0.000684 | AM_not_in_group | 0.004279 |
| 0.007396 | AM_not_in_group | 0.018413 |
| 0.000613 | AM_not_in_group | 0.000092 |
| 0.000684 | AM_not_in_group | 0.004514 |
| 0.009497 | AM_not_in_group | 0.000093 |
| 0.107042 | AM_not_in_group | 0.001032 |
| 0.000393 | AM_not_in_group | 0.001696 |
| 0.002472 | AM_not_in_group | 0.00101  |
| 0.001614 | AM_not_in_group | 0.000155 |
| 0.02021  | AM_not_in_group | 0.045626 |
| 0.001819 | AM_not_in_group | 0.01055  |
| 0.01798  | AM_not_in_group | 0.023164 |
| 0.01798  | AM_not_in_group | 0.023164 |
| 0.01798  | AM_not_in_group | 0.023164 |
| 0.001763 | AM_not_in_group | 0.002486 |
| 0.080581 | AM_not_in_group | 0.055045 |
| 0.00372  | AM_not_in_group | 0.011841 |
| 0.000315 | AM_not_in_group | 0.009433 |
| 0.002669 | AM_not_in_group | 0.026701 |
| 0.002233 | AM_not_in_group | 0.005409 |
| 0.008458 | AM_not_in_group | 0.000788 |
| 0.080459 | AM_not_in_group | 0.122203 |
| 0.000299 | AM_not_in_group | 0.011418 |
| 1        | AM_not_in_group | 0.009415 |
| 0.022656 | AM_not_in_group | 0.009415 |
| 0.022656 | AM_not_in_group | 0.009415 |
| 1        | AM_not_in_group | 0.00162  |
| 0.001113 | AM_not_in_group | 0.001142 |
| 0.00747  | AM_not_in_group | 0.000731 |
| 0.003196 | AM_not_in_group | 0.002308 |
| 0.007663 | AM_not_in_group | 0.000051 |
| 0.007663 | AM_not_in_group | 0.000051 |
| 0.038778 | AM_not_in_group | 0.019121 |
| 0.006246 | AM_not_in_group | 0.004511 |
| 0.01068  | AM_not_in_group | 0.00022  |
| 0.028684 | AM_not_in_group | 0.02044  |
| 0.074866 | AM_not_in_group | 0.000796 |
| 0.009303 | AM_not_in_group | 0.101014 |
| 0.000523 | AM_not_in_group | 0.000099 |



diffusion\_prioritization\_ALL

|          |                 |          |
|----------|-----------------|----------|
| 0.001373 | AM_not_in_group | 0.000049 |
| 0.052457 | AM_not_in_group | 0.003197 |
| 0.000601 | AM_not_in_group | 0.001931 |
| 0.008381 | AM_not_in_group | 0.002383 |
| 0.008381 | AM_not_in_group | 0.002383 |
| 0.008381 | AM_not_in_group | 0.002383 |
| 0.014654 | AM_not_in_group | 0.000075 |
| 0.004598 | AM_not_in_group | 0.004268 |
| 0.024682 | AM_not_in_group | 0.012268 |
| 0.001739 | AM_not_in_group | 0.00124  |
| 0.014702 | AM_not_in_group | 0.006058 |
| 0.002419 | AM_not_in_group | 0.000225 |
| 0.000219 | AM_not_in_group | 0.000027 |
| 0.000235 | AM_not_in_group | 0.01184  |
| 0.004894 | AM_not_in_group | 0.000435 |
| 0.001927 | AM_not_in_group | 0.001342 |
| 1        | AM_not_in_group | 0.000007 |
| 0.016533 | AM_not_in_group | 0.002369 |
| 0.000069 | AM_not_in_group | 0.000002 |
| 0.000069 | AM_not_in_group | 0.000002 |
| 0.000069 | AM_not_in_group | 0.000002 |
| 0.003828 | AM_not_in_group | 0.003843 |
| 0.015779 | AM_not_in_group | 0.003597 |
| 0.007749 | AM_not_in_group | 0.0026   |
| 0.00108  | AM_not_in_group | 0.008503 |
| 0.007513 | AM_not_in_group | 0.005195 |
| 0.103416 | AM_not_in_group | 0.010159 |
| 0.003471 | AM_not_in_group | 0.00231  |
| 0.000166 | AM_not_in_group | 0.000012 |
| 0.000166 | AM_not_in_group | 0.000012 |
| 0.001628 | AM_not_in_group | 0.015241 |
| 0.000164 | AM_not_in_group | 0.000217 |
| 0.001532 | AM_not_in_group | 0.000101 |

diffusion\_prioritization\_ALL

|          |                 |          |
|----------|-----------------|----------|
| 0.074619 | AM_not_in_group | 0.223029 |
| 0.008201 | AM_not_in_group | 0.000622 |
| 1        | AM_not_in_group | 0.000208 |
| 0.00345  | AM_not_in_group | 0.003849 |
| 0.041276 | AM_not_in_group | 0.001114 |
| 0.006461 | AM_not_in_group | 0.008617 |
| 0.006461 | AM_not_in_group | 0.008617 |
| 0.006461 | AM_not_in_group | 0.008617 |
| 0.009152 | AM_not_in_group | 0.008094 |
| 0.000186 | AM_not_in_group | 0.000958 |
| 0.001187 | AM_not_in_group | 0.00081  |
| 0.001187 | AM_not_in_group | 0.00081  |
| 0.021706 | AM_not_in_group | 0.027216 |
| 0.005678 | AM_not_in_group | 0.000329 |
| 0.003127 | AM_not_in_group | 0.019928 |
| 0.003764 | AM_not_in_group | 0.005226 |
| 0.050515 | AM_not_in_group | 0.139016 |
| 0.005241 | AM_not_in_group | 0.000916 |
| 0.002478 | AM_not_in_group | 0.002264 |
| 0.001918 | AM_not_in_group | 0.001072 |
| 0.00992  | AM_not_in_group | 0.002606 |
| 0.00992  | AM_not_in_group | 0.002606 |
| 0.00992  | AM_not_in_group | 0.002606 |
| 0.002093 | AM_not_in_group | 0.001798 |
| 0.001985 | AM_not_in_group | 0.001031 |
| 0.007971 | AM_not_in_group | 0.004755 |
| 0.011928 | AM_not_in_group | 0.01157  |
| 0.09547  | AM_not_in_group | 0.004206 |
| 0.001017 | AM_not_in_group | 0.000335 |
| 0.000271 | AM_not_in_group | 0.001403 |
| 0.002258 | AM_not_in_group | 0.067982 |
| 0.018463 | AM_not_in_group | 0.000284 |
| 0.002196 | AM_not_in_group | 0.000483 |
| 0.00021  | AM_not_in_group | 0.007203 |
| 0.00021  | AM_not_in_group | 0.007203 |
| 0.000751 | AM_not_in_group | 0.005418 |
| 0.002816 | AM_not_in_group | 0.00003  |
| 0.002816 | AM_not_in_group | 0.00003  |
| 0.002816 | AM_not_in_group | 0.00003  |

## diffusion\_prioritization\_ALL

|          |                 |          |
|----------|-----------------|----------|
| 0.002816 | AM_not_in_group | 0.00003  |
| 0.007859 | AM_not_in_group | 0.000596 |
| 0.003295 | AM_not_in_group | 0.001404 |
| 0.000165 | AM_not_in_group | 0.000943 |
| 0.000165 | AM_not_in_group | 0.000943 |
| 0.000165 | AM_not_in_group | 0.000943 |
| 0.050824 | AM_not_in_group | 0.000006 |
| 0.013738 | AM_not_in_group | 0.110442 |
| 0.001368 | AM_not_in_group | 0.000427 |
| 0.000537 | AM_not_in_group | 0.001727 |
| 0.004657 | AM_not_in_group | 0.003612 |
| 0.004657 | AM_not_in_group | 0.003612 |
| 0.004657 | AM_not_in_group | 0.003612 |
| 0.001382 | AM_not_in_group | 0.000685 |
| 0.0034   | AM_not_in_group | 0.001559 |
| 0.001345 | AM_not_in_group | 0.001362 |
| 0.000929 | AM_not_in_group | 0.000909 |
| 0.002051 | AM_not_in_group | 0.000845 |
| 0.005235 | AM_not_in_group | 0.000508 |
| 0.000563 | AM_not_in_group | 0.000448 |
| 0.000563 | AM_not_in_group | 0.000448 |
| 0.000563 | AM_not_in_group | 0.000448 |
| 0.007726 | AM_not_in_group | 0.002737 |
| 0.001519 | AM_not_in_group | 0.000871 |
| 0.014715 | AM_not_in_group | 0.011533 |
| 0.000425 | AM_not_in_group | 0.000068 |
| 0.000364 | AM_not_in_group | 0.000051 |
| 0.000364 | AM_not_in_group | 0.000051 |
| 0.000017 | AM_not_in_group | 0.000015 |
| 0.01486  | AM_not_in_group | 0.015101 |
| 1        | AM_not_in_group | 0.015101 |
| 0.01486  | AM_not_in_group | 0.015101 |
| 0.01691  | AM_not_in_group | 0.000038 |

## diffusion\_prioritization\_ALL

|          |                 |          |
|----------|-----------------|----------|
| 0.001185 | AM_not_in_group | 0.000042 |
| 0.001501 | AM_not_in_group | 0.00001  |
| 0.000227 | AM_not_in_group | 0.000818 |
| 0.003713 | AM_not_in_group | 0.003456 |
| 0.000531 | AM_not_in_group | 0.001827 |
| 0.000531 | AM_not_in_group | 0.001827 |
| 0.010584 | AM_not_in_group | 0.013636 |
| 0.002045 | AM_not_in_group | 0.001201 |
| 0.001136 | AM_not_in_group | 0.00038  |
| 0.005673 | AM_not_in_group | 0.005024 |
| 0.052658 | AM_not_in_group | 0.001181 |
| 0.020633 | AM_not_in_group | 0.00018  |
| 1        | AM_not_in_group | 0.00018  |
| 0.020633 | AM_not_in_group | 0.00018  |
| 0.020633 | AM_not_in_group | 0.00018  |
| 0.020633 | AM_not_in_group | 0.00018  |
| 0.00082  | AM_not_in_group | 0.000286 |
| 0.002449 | AM_not_in_group | 0.087441 |
| 0.002641 | AM_not_in_group | 0.000028 |
| 0.000191 | AM_not_in_group | 0.000119 |
| 0.011011 | AM_in_group     | 1        |
| 0.011011 | AM_not_in_group | 0.010681 |
| 0.008075 | AM_not_in_group | 0.021814 |
| 0.008075 | AM_not_in_group | 0.021814 |
| 0.001582 | AM_not_in_group | 0.003616 |
| 0.000579 | AM_not_in_group | 0.000602 |
| 0.002289 | AM_not_in_group | 0.002674 |
| 0.008564 | AM_not_in_group | 0.053814 |
| 1        | AM_not_in_group | 0.002608 |
| 0.001017 | AM_not_in_group | 0.000082 |
| 0.001017 | AM_not_in_group | 0.000082 |

diffusion\_prioritization\_ALL

|          |                 |          |
|----------|-----------------|----------|
| 0.001017 | AM_not_in_group | 0.000082 |
| 0.001368 | AM_not_in_group | 0.000325 |
| 0.001094 | AM_not_in_group | 0.000366 |
| 0.007576 | AM_not_in_group | 0.001904 |
| 0.001022 | AM_not_in_group | 0.000409 |
| 0.001022 | AM_not_in_group | 0.000409 |
| 0.001022 | AM_not_in_group | 0.000409 |
| 0.008273 | AM_not_in_group | 0.002757 |
| 0.001907 | AM_not_in_group | 0.000786 |
| 0.011684 | AM_not_in_group | 0.000672 |
| 0.03733  | AM_not_in_group | 0.03187  |
| 0.006723 | AM_not_in_group | 0.000461 |
| 0.022239 | AM_in_group     | 1        |
| 0.022239 | AM_not_in_group | 0.062822 |
| 0.005001 | AM_not_in_group | 0.000284 |
| 0.000711 | AM_not_in_group | 0.0002   |
| 0.027856 | AM_not_in_group | 0.002408 |
| 0.000817 | AM_not_in_group | 0.012377 |
| 0.018431 | AM_not_in_group | 0.000217 |
| 0.001896 | AM_not_in_group | 0.00042  |
| 0.010761 | AM_not_in_group | 0.011316 |
| 0.006219 | AM_not_in_group | 0.010892 |
| 0.001247 | AM_not_in_group | 0.000296 |
| 0.000721 | AM_not_in_group | 0.000317 |
| 0.000982 | AM_not_in_group | 0.000095 |
| 0.01042  | AM_not_in_group | 0.000521 |
| 0.00341  | AM_not_in_group | 0.07366  |
| 0.000089 | AM_not_in_group | 0.000043 |
| 0.003138 | AM_not_in_group | 0.00315  |
| 0.013452 | AM_in_group     | 1        |
| 0.013452 | AM_not_in_group | 0.013445 |



diffusion\_prioritization\_ALL

|          |                 |          |
|----------|-----------------|----------|
| 0.013452 | AM_not_in_group | 0.013445 |
| 1        | AM_not_in_group | 0.013445 |
| 0.013452 | AM_not_in_group | 0.013445 |
| 0.013452 | AM_not_in_group | 0.013445 |
| 0.045977 | AM_not_in_group | 1.32409  |
| 0.007127 | AM_not_in_group | 0.001379 |
| 0.002108 | AM_not_in_group | 0.001722 |
| 0.000964 | AM_not_in_group | 0.004274 |
| 0.000964 | AM_not_in_group | 0.004274 |
| 0.002479 | AM_not_in_group | 0.001446 |
| 0.005098 | AM_not_in_group | 0.020763 |
| 0.001991 | AM_not_in_group | 0.000676 |
| 0.012245 | AM_not_in_group | 0.135541 |
| 0.101876 | AM_not_in_group | 0.01245  |
| 0.101876 | AM_not_in_group | 0.01245  |
| 0.00011  | AM_not_in_group | 0.000038 |
| 0.000016 | AM_not_in_group | 0.000324 |
| 0.012494 | AM_not_in_group | 0.012129 |
| 0.006538 | AM_not_in_group | 0.001832 |
| 0.000895 | AM_not_in_group | 0.000531 |
| 0.008304 | AM_not_in_group | 0.001804 |
| 0.005666 | AM_not_in_group | 0.001003 |
| 0.000939 | AM_not_in_group | 0.000075 |

## diffusion\_prioritization\_ALL

|          |                 |          |
|----------|-----------------|----------|
| 0.000939 | AM_not_in_group | 0.000075 |
| 0.012547 | AM_not_in_group | 0.004708 |
| 0.008336 | AM_not_in_group | 0.001176 |
| 0.008909 | AM_not_in_group | 0.000905 |
| 0.000433 | AM_not_in_group | 0.000124 |
| 0.001517 | AM_not_in_group | 0.024732 |
| 0.001142 | AM_not_in_group | 0.001156 |
| 0.001584 | AM_not_in_group | 0.00017  |
| 0.006671 | AM_not_in_group | 0.002594 |
| 0.006671 | AM_not_in_group | 0.002594 |
| 0.00043  | AM_not_in_group | 0.000123 |
| 0.00043  | AM_not_in_group | 0.000123 |
| 0.00043  | AM_not_in_group | 0.000123 |
| 0.068441 | AM_not_in_group | 0.005821 |
| 0.000452 | AM_not_in_group | 0.000994 |
| 0.003036 | AM_not_in_group | 0.001326 |
| 0.000236 | AM_not_in_group | 0.001223 |
| 0.00092  | AM_not_in_group | 0.004666 |
| 0.00092  | AM_not_in_group | 0.004666 |
| 0.00092  | AM_not_in_group | 0.004666 |
| 0.019741 | AM_not_in_group | 0.002561 |
| 0.007013 | AM_not_in_group | 0.001086 |
| 0.11477  | AM_not_in_group | 0.101446 |
| 0.014047 | AM_not_in_group | 0.015434 |
| 0.000067 | AM_not_in_group | 0.000009 |

diffusion\_prioritization\_ALL

|          |                 |          |
|----------|-----------------|----------|
| 0.004517 | AM_not_in_group | 0.00068  |
| 0.026597 | AM_not_in_group | 0.067593 |
| 0.026597 | AM_not_in_group | 0.067593 |
| 0.000904 | AM_not_in_group | 0.000073 |
| 0.006509 | AM_not_in_group | 0.002563 |
| 0.092478 | AM_not_in_group | 0.062432 |
| 0.136801 | AM_not_in_group | 0.004741 |
| 0.002987 | AM_not_in_group | 0.001301 |
| 0.117233 | AM_not_in_group | 0.000162 |
| 0.004501 | AM_not_in_group | 0.002809 |
| 0.000347 | AM_not_in_group | 0.000243 |
| 0.00501  | AM_not_in_group | 0.020548 |
| 0.055846 | AM_not_in_group | 0.072012 |
| 0.00066  | AM_not_in_group | 0.015477 |
| 0.001368 | AM_not_in_group | 0.003128 |
| 0.009217 | AM_not_in_group | 0.002795 |
| 0.000483 | AM_not_in_group | 0.000084 |
| 0.000483 | AM_not_in_group | 0.000084 |
| 0.000483 | AM_not_in_group | 0.000084 |
| 0.000425 | AM_not_in_group | 0.000408 |
| 0.01448  | AM_not_in_group | 0.143817 |
| 0.01448  | AM_not_in_group | 0.143817 |
| 0.000849 | AM_not_in_group | 0.009093 |
| 0.019138 | AM_not_in_group | 0.003464 |
| 0.014178 | AM_not_in_group | 0.00137  |
| 0.005813 | AM_not_in_group | 0.000913 |
| 0.000053 | AM_not_in_group | 0.000065 |
| 0.000053 | AM_not_in_group | 0.000065 |
| 0.000053 | AM_not_in_group | 0.000065 |
| 0.000008 | AM_not_in_group | 0.000015 |
| 0.003137 | AM_in_group     | 1        |
| 0.003137 | AM_not_in_group | 0.121484 |
| 0.003137 | AM_not_in_group | 0.121484 |
| 0.003137 | AM_not_in_group | 0.121484 |

diffusion\_prioritization\_ALL

|          |                 |          |
|----------|-----------------|----------|
| 0.003137 | AM_not_in_group | 0.121484 |
| 0.003137 | AM_not_in_group | 0.121484 |
| 0.003137 | AM_not_in_group | 0.121484 |
| 0.029221 | AM_not_in_group | 0.026839 |
| 0.000446 | AM_not_in_group | 0.002075 |
| 0.116174 | AM_in_group     | 1        |
| 0.000973 | AM_not_in_group | 0.000349 |
| 0.000577 | AM_not_in_group | 0.000042 |
| 0.000577 | AM_not_in_group | 0.000042 |
| 0.00019  | AM_not_in_group | 0.000185 |
| 0.00231  | AM_not_in_group | 0.016211 |
| 0.000847 | AM_not_in_group | 0.000068 |
| 0.033228 | AM_not_in_group | 0.15294  |
| 0.003683 | AM_not_in_group | 0.003838 |
| 0.023531 | AM_not_in_group | 0.001669 |
| 0.001072 | AM_not_in_group | 0.00016  |
| 0.000051 | AM_not_in_group | 0.000062 |
| 0.00383  | AM_not_in_group | 0.004127 |
| 0.012783 | AM_not_in_group | 0.002838 |
| 0.000198 | AM_not_in_group | 0.00007  |
| 0.002381 | AM_not_in_group | 0.000916 |
| 1        | AM_not_in_group | 0.078411 |
| 0.00051  | AM_not_in_group | 0.001853 |
| 0.00051  | AM_not_in_group | 0.001853 |
| 0.000173 | AM_not_in_group | 0.000078 |
| 0.000173 | AM_not_in_group | 0.000078 |
| 0.000973 | AM_not_in_group | 0.004465 |
| 0.000085 | AM_not_in_group | 0.000022 |
| 0.000085 | AM_not_in_group | 0.000022 |

diffusion\_prioritization\_ALL

|          |                 |          |
|----------|-----------------|----------|
| 0.000085 | AM_not_in_group | 0.000022 |
| 0.000085 | AM_not_in_group | 0.000022 |
| 0.000085 | AM_not_in_group | 0.000022 |
| 0.034346 | AM_in_group     | 1        |
| 0.034346 | AM_not_in_group | 0.018015 |
| 1        | AM_not_in_group | 0.018015 |
| 0.034346 | AM_not_in_group | 0.018015 |
| 1        | AM_not_in_group | 0.018015 |
| 1        | AM_not_in_group | 0.018015 |
| 0.034346 | AM_not_in_group | 0.018015 |
| 0.034346 | AM_not_in_group | 0.018015 |
| 0.034346 | AM_not_in_group | 0.018015 |
| 0.000841 | AM_not_in_group | 0.00003  |
| 0.000739 | AM_not_in_group | 0.000133 |
| 0.000457 | AM_not_in_group | 0.000086 |
| 0.000049 | AM_not_in_group | 0.000171 |
| 0.008059 | AM_not_in_group | 0.007879 |
| 0.000632 | AM_not_in_group | 0.014694 |
| 0.010967 | AM_not_in_group | 0.024119 |
| 0.00207  | AM_not_in_group | 0.002128 |
| 0.014456 | AM_not_in_group | 0.003309 |
| 1        | AM_not_in_group | 0.31521  |
| 0.009402 | AM_not_in_group | 0.001576 |
| 0.009402 | AM_not_in_group | 0.001576 |
| 0.000283 | AM_not_in_group | 0.000799 |
| 0.000283 | AM_not_in_group | 0.000799 |
| 0.000283 | AM_not_in_group | 0.000799 |
| 0.110712 | AM_not_in_group | 0.006996 |
| 0.053333 | AM_not_in_group | 0.000134 |
| 1        | AM_not_in_group | 0.000134 |
| 0.021029 | AM_not_in_group | 0.002634 |

diffusion\_prioritization\_ALL

|          |                 |          |
|----------|-----------------|----------|
| 0.021029 | AM_not_in_group | 0.002634 |
| 0.021029 | AM_not_in_group | 0.002634 |
| 0.000054 | AM_not_in_group | 0.000168 |
| 0.031201 | AM_not_in_group | 0.130543 |
| 0.00304  | AM_not_in_group | 0.001648 |
| 0.000902 | AM_not_in_group | 0.000208 |
| 0.006998 | AM_not_in_group | 0.000195 |
| 0.000041 | AM_not_in_group | 0.000641 |
| 0.000961 | AM_not_in_group | 0.002869 |
| 0.522573 | AM_not_in_group | 0.000176 |
| 0.002898 | AM_not_in_group | 0.000942 |
| 0.006234 | AM_not_in_group | 0.005188 |
| 0.021783 | AM_not_in_group | 0.011154 |
| 0.002531 | AM_not_in_group | 0.000444 |
| 0.01127  | AM_in_group     | 1        |
| 0.005818 | AM_not_in_group | 0.000022 |
| 0.000945 | AM_not_in_group | 0.000195 |
| 0.003589 | AM_not_in_group | 0.001496 |
| 0.001823 | AM_not_in_group | 0.010929 |
| 0.018425 | AM_not_in_group | 0.057389 |
| 0.029138 | AM_not_in_group | 0.015223 |
| 0.000059 | AM_not_in_group | 0.00004  |
| 0.000428 | AM_not_in_group | 0.00297  |
| 0.003595 | AM_not_in_group | 0.000408 |
| 0.000718 | AM_not_in_group | 0.000071 |
| 0.001933 | AM_not_in_group | 0.000799 |
| 0.083404 | AM_not_in_group | 0.007629 |
| 0.000629 | AM_not_in_group | 0.002362 |
| 0.000214 | AM_not_in_group | 0.000261 |

diffusion\_prioritization\_ALL

|          |                 |          |
|----------|-----------------|----------|
| 0.004858 | AM_not_in_group | 0.003256 |
| 0.000178 | AM_not_in_group | 0.00032  |
| 0.000178 | AM_not_in_group | 0.00032  |
| 0.000178 | AM_not_in_group | 0.00032  |
| 0.010805 | AM_in_group     | 1        |
| 0.001762 | AM_not_in_group | 0.00031  |
| 0.003852 | AM_not_in_group | 0.000821 |
| 0.014457 | AM_in_group     | 1        |
| 0.000181 | AM_not_in_group | 0.000055 |
| 0.000706 | AM_not_in_group | 0.004122 |
| 0.000706 | AM_not_in_group | 0.004122 |
| 0.000706 | AM_not_in_group | 0.004122 |
| 0.001023 | AM_not_in_group | 0.00009  |
| 0.003624 | AM_not_in_group | 0.00021  |
| 0.004253 | AM_not_in_group | 0.000514 |
| 0.011292 | AM_not_in_group | 0.000265 |
| 0.000521 | AM_not_in_group | 0.000063 |
| 0.000882 | AM_not_in_group | 0.000277 |
| 0.000882 | AM_not_in_group | 0.000277 |
| 0.000282 | AM_not_in_group | 0.000413 |
| 0.000225 | AM_not_in_group | 0.000082 |
| 0.000939 | AM_not_in_group | 0.006703 |
| 0.00484  | AM_not_in_group | 0.004112 |
| 0.038871 | AM_not_in_group | 0.000912 |
| 0.003402 | AM_not_in_group | 0.004873 |
| 0.00257  | AM_not_in_group | 0.000085 |
| 0.000775 | AM_not_in_group | 0.000064 |
| 0.006665 | AM_not_in_group | 0.025309 |
| 0.001823 | AM_not_in_group | 0.00009  |
| 0.001823 | AM_not_in_group | 0.00009  |
| 0.001823 | AM_not_in_group | 0.00009  |
| 0.002352 | AM_not_in_group | 0.001083 |
| 0.002068 | AM_not_in_group | 0.000693 |
| 0.014109 | AM_in_group     | 1        |
| 0.016813 | AM_not_in_group | 0.008715 |
| 0.005371 | AM_not_in_group | 0.00002  |

## diffusion\_prioritization\_ALL

|          |                 |          |
|----------|-----------------|----------|
| 0.005371 | AM_not_in_group | 0.00002  |
| 0.006419 | AM_not_in_group | 0.002027 |
| 0.002704 | AM_not_in_group | 0.001249 |
| 0.002704 | AM_not_in_group | 0.001249 |
| 0.002704 | AM_not_in_group | 0.001249 |
| 0.000766 | AM_not_in_group | 0.004004 |
| 0.001685 | AM_not_in_group | 0.000365 |
| 0.032441 | AM_not_in_group | 0.000004 |
| 0.015892 | AM_not_in_group | 0.021355 |
| 0.002222 | AM_not_in_group | 0.000163 |
| 0.000614 | AM_in_group     | 1        |
| 0.000614 | AM_not_in_group | 0.025738 |
| 0.000614 | AM_not_in_group | 0.025738 |
| 0.000614 | AM_not_in_group | 0.025738 |
| 0.003733 | AM_not_in_group | 0.001496 |
| 0.03236  | AM_not_in_group | 0.001843 |
| 0.03236  | AM_not_in_group | 0.001843 |
| 0.028784 | AM_not_in_group | 0.015097 |
| 0.008917 | AM_not_in_group | 0.000062 |
| 0.008917 | AM_not_in_group | 0.000062 |
| 0.000049 | AM_not_in_group | 0.000542 |
| 0.000049 | AM_not_in_group | 0.000542 |
| 0.001224 | AM_not_in_group | 0.000465 |
| 0.00043  | AM_not_in_group | 0.000099 |
| 0.000722 | AM_not_in_group | 0.001692 |
| 0.001037 | AM_not_in_group | 0.002048 |
| 0.000294 | AM_not_in_group | 0.00122  |
| 0.000294 | AM_not_in_group | 0.00122  |
| 0.009975 | AM_not_in_group | 0.164998 |
| 0.009975 | AM_not_in_group | 0.164998 |
| 0.001627 | AM_not_in_group | 0.000286 |
| 0.001627 | AM_not_in_group | 0.000286 |
| 0.002374 | AM_not_in_group | 0.002151 |
| 0.004438 | AM_not_in_group | 0.06433  |
| 0.000386 | AM_not_in_group | 0.000066 |
| 0.001024 | AM_not_in_group | 0.000085 |
| 0.065888 | AM_not_in_group | 0.000315 |
| 0.001915 | AM_not_in_group | 0.00005  |



## diffusion\_prioritization\_ALL

|          |                 |          |
|----------|-----------------|----------|
| 0.001915 | AM_not_in_group | 0.00005  |
| 0.000003 | AM_not_in_group | 0.000065 |
| 0.081804 | AM_not_in_group | 0.001253 |
| 0.000167 | AM_not_in_group | 0.000051 |
| 0.000219 | AM_not_in_group | 0.00356  |
| 0.00002  | AM_not_in_group | 0.000393 |
| 0.001593 | AM_not_in_group | 0.00049  |
| 0.004606 | AM_not_in_group | 0.000017 |
| 0.010869 | AM_not_in_group | 0.022946 |
| 0.000652 | AM_not_in_group | 0.004602 |
| 0.000652 | AM_not_in_group | 0.004602 |

diffusion\_prioritization\_ALL

|          |                 |          |
|----------|-----------------|----------|
| 0.000652 | AM_not_in_group | 0.004602 |
| 0.000652 | AM_not_in_group | 0.004602 |
| 0.000652 | AM_not_in_group | 0.004602 |
| 0.00361  | AM_not_in_group | 0.000363 |
| 0.000246 | AM_not_in_group | 0.000339 |
| 1        | AM_not_in_group | 0.005863 |
| 0.000208 | AM_not_in_group | 0.000075 |
| 0.004577 | AM_not_in_group | 0.000017 |
| 0.007028 | AM_not_in_group | 0.006818 |
| 0.010947 | AM_not_in_group | 0.000169 |
| 0.002869 | AM_not_in_group | 0.001109 |
| 0.000488 | AM_not_in_group | 0.000463 |
| 0.000488 | AM_not_in_group | 0.000463 |
| 0.000163 | AM_not_in_group | 0.000049 |
| 0.001279 | AM_not_in_group | 0.000063 |
| 0.001279 | AM_not_in_group | 0.000063 |
| 0.001279 | AM_not_in_group | 0.000063 |
| 0.000128 | AM_not_in_group | 0.000101 |
| 0.011961 | AM_not_in_group | 0.45921  |
| 0.002393 | AM_not_in_group | 0.003557 |
| 0.028296 | AM_not_in_group | 0.00008  |
| 0.007285 | AM_not_in_group | 0.004223 |
| 0.000729 | AM_not_in_group | 0.000026 |
| 0.000351 | AM_not_in_group | 0.00234  |
| 0.000842 | AM_not_in_group | 0.000129 |
| 0.001601 | AM_not_in_group | 0.000469 |
| 0.007077 | AM_not_in_group | 0.000381 |
| 0.00001  | AM_not_in_group | 0.000005 |
| 0.00001  | AM_not_in_group | 0.000005 |
| 0.00001  | AM_not_in_group | 0.000005 |
| 0.000315 | AM_not_in_group | 0.000037 |
| 0.000315 | AM_not_in_group | 0.000037 |
| 0.000315 | AM_not_in_group | 0.000037 |
| 0.000878 | AM_not_in_group | 0.001969 |
| 0.000698 | AM_not_in_group | 0.000234 |
| 1        | AM_not_in_group | 0.079764 |
| 0.005207 | AM_not_in_group | 0.004915 |
| 0.005207 | AM_not_in_group | 0.004915 |
| 0.005207 | AM_not_in_group | 0.004915 |

diffusion\_prioritization\_ALL

|          |                 |          |
|----------|-----------------|----------|
| 0.00049  | AM_not_in_group | 0.003001 |
| 1        | AM_not_in_group | 0.075941 |
| 0.002267 | AM_not_in_group | 0.002711 |
| 0.000671 | AM_not_in_group | 0.001573 |
| 0.001064 | AM_not_in_group | 0.000137 |
| 0.042863 | AM_not_in_group | 0.004888 |
| 0.028228 | AM_not_in_group | 0.000164 |
| 0.00149  | AM_not_in_group | 0.019769 |
| 0.00201  | AM_not_in_group | 0.017873 |
| 0.000391 | AM_not_in_group | 0.000091 |
| 0.001183 | AM_not_in_group | 0.000739 |
| 0.003343 | AM_not_in_group | 0.00296  |
| 0.000024 | AM_not_in_group | 0.002779 |
| 0.000048 | AM_not_in_group | 0.000764 |
| 0.0001   | AM_not_in_group | 0.000429 |
| 0.000064 | AM_not_in_group | 0.000134 |
| 0.021919 | AM_in_group     | 1        |
| 0.021919 | AM_in_group     | 1        |
| 0.021919 | AM_not_in_group | 0.274709 |
| 0.000077 | AM_not_in_group | 0.000342 |
| 0.000625 | AM_not_in_group | 0.021307 |
| 0.000625 | AM_not_in_group | 0.021307 |
| 0.000479 | AM_not_in_group | 0.000407 |
| 0.027192 | AM_not_in_group | 0.000158 |

## diffusion\_prioritization\_ALL

|          |                 |          |
|----------|-----------------|----------|
| 0.000543 | AM_not_in_group | 0.000182 |
| 0.000543 | AM_not_in_group | 0.000182 |
| 0.000543 | AM_not_in_group | 0.000182 |
| 0.000503 | AM_not_in_group | 0.000295 |
| 0.003765 | AM_not_in_group | 0.00091  |
| 0.000781 | AM_not_in_group | 0.004198 |
| 0.000327 | AM_not_in_group | 0.002176 |
| 0.000959 | AM_not_in_group | 0.000124 |
| 0.005642 | AM_not_in_group | 0.000026 |
| 0.005642 | AM_not_in_group | 0.000026 |
| 0.005642 | AM_not_in_group | 0.000026 |
| 0.016157 | AM_not_in_group | 0.000026 |
| 0.000599 | AM_not_in_group | 0.000048 |
| 0.009464 | AM_not_in_group | 0.000023 |
| 1        | AM_not_in_group | 0.000023 |
| 0.009464 | AM_not_in_group | 0.000023 |

diffusion\_prioritization\_ALL

|          |                 |          |
|----------|-----------------|----------|
| 0.009464 | AM_not_in_group | 0.000023 |
| 0.000402 | AM_not_in_group | 0.000064 |
| 0.000533 | AM_not_in_group | 0.002644 |
| 0.002526 | AM_not_in_group | 0.000119 |
| 0.014282 | AM_in_group     | 1        |
| 0.001435 | AM_not_in_group | 0.000531 |
| 0.000963 | AM_not_in_group | 0.00074  |
| 0.001932 | AM_not_in_group | 0.000765 |
| 0.00089  | AM_not_in_group | 0.002387 |
| 0.072243 | AM_in_group     | 1        |
| 0.001289 | AM_not_in_group | 0.000404 |
| 0.027104 | AM_not_in_group | 0.001544 |
| 0.001164 | AM_not_in_group | 0.000108 |
| 0.000577 | AM_not_in_group | 0.000046 |
| 0.12235  | AM_not_in_group | 0.00023  |
| 0.000804 | AM_not_in_group | 0.000393 |
| 0.000387 | AM_not_in_group | 0.000061 |
| 0.002007 | AM_not_in_group | 0.001069 |
| 0.001854 | AM_not_in_group | 0.002479 |
| 0.007506 | AM_not_in_group | 0.00236  |
| 0.096522 | AM_not_in_group | 0.118641 |
| 0.000067 | AM_not_in_group | 0.00006  |
| 0.000394 | AM_not_in_group | 0.000444 |



## diffusion\_prioritization\_ALL

|          |                 |          |
|----------|-----------------|----------|
| 0.000042 | AM_not_in_group | 0.000056 |
| 0.001815 | AM_not_in_group | 0.000862 |
| 0.000242 | AM_not_in_group | 0.000057 |
| 0.001804 | AM_not_in_group | 0.000857 |
| 0.000814 | AM_not_in_group | 0.000387 |
| 0.000426 | AM_not_in_group | 0.002589 |
| 0.005286 | AM_not_in_group | 0.000823 |
| 0.003565 | AM_not_in_group | 0.004708 |
| 0.006651 | AM_not_in_group | 0.000581 |
| 0.001792 | AM_not_in_group | 0.001799 |
| 0.000831 | AM_not_in_group | 0.000034 |
| 1        | AM_not_in_group | 0.019927 |
| 0.091935 | AM_not_in_group | 0.019927 |
| 1        | AM_not_in_group | 0.019927 |
| 0.091935 | AM_not_in_group | 0.019927 |
| 0.044601 | AM_not_in_group | 0.00043  |
| 0.044601 | AM_not_in_group | 0.00043  |
| 0.000964 | AM_not_in_group | 0.000121 |
| 0.024876 | AM_not_in_group | 0.00989  |
| 0.002963 | AM_not_in_group | 0.003576 |
| 0.000915 | AM_not_in_group | 0.001081 |
| 0.000107 | AM_not_in_group | 0.000085 |
| 0.008826 | AM_not_in_group | 0.000749 |
| 0.00004  | AM_not_in_group | 0.000054 |
| 0.001671 | AM_not_in_group | 0.001079 |
| 0.008948 | AM_in_group     | 1        |
| 0.091181 | AM_not_in_group | 0.10094  |
| 0.011652 | AM_not_in_group | 0.001393 |
| 0.002791 | AM_not_in_group | 0.001971 |
| 0.000158 | AM_not_in_group | 0.002193 |
| 0.005016 | AM_not_in_group | 0.001365 |
| 0.002087 | AM_not_in_group | 0.003041 |
| 0.002142 | AM_not_in_group | 0.002154 |

## diffusion\_prioritization\_ALL

|          |                 |          |
|----------|-----------------|----------|
| 0.004226 | AM_not_in_group | 0.000395 |
| 0.004226 | AM_not_in_group | 0.000395 |
| 0.000165 | AM_not_in_group | 0.00006  |
| 0.000704 | AM_in_group     | 1        |
| 0.000704 | AM_not_in_group | 0.004741 |
| 0.009569 | AM_not_in_group | 0.000433 |
| 0.009569 | AM_not_in_group | 0.000433 |
| 0.009569 | AM_not_in_group | 0.000433 |
| 0.001848 | AM_not_in_group | 0.000095 |
| 0.004238 | AM_not_in_group | 0.000381 |
| 0.000259 | AM_not_in_group | 0.000831 |



diffusion\_prioritization\_ALL

|          |                 |          |
|----------|-----------------|----------|
| 0.000259 | AM_not_in_group | 0.000831 |
| 0.000938 | AM_not_in_group | 0.000157 |
| 0.006097 | AM_not_in_group | 0.008248 |
| 0.003265 | AM_not_in_group | 0.000043 |
| 0.011136 | AM_not_in_group | 0.02238  |
| 0.002166 | AM_not_in_group | 0.000567 |
| 0.000987 | AM_not_in_group | 0.000407 |
| 0.000987 | AM_not_in_group | 0.000407 |
| 0.003616 | AM_not_in_group | 0.004938 |
| 0.0073   | AM_not_in_group | 0.000024 |
| 0.000782 | AM_not_in_group | 0.000278 |
| 0.000779 | AM_not_in_group | 0.000233 |
| 0.008662 | AM_in_group     | 1        |
| 0.008662 | AM_in_group     | 1        |
| 0.000037 | AM_not_in_group | 0.000001 |
| 0.000985 | AM_not_in_group | 0.01388  |
| 0.013694 | AM_not_in_group | 0.000498 |
| 0.000398 | AM_not_in_group | 0.009588 |
| 0.004125 | AM_not_in_group | 0.000371 |
| 0.035031 | AM_not_in_group | 0.000088 |
| 1        | AM_not_in_group | 0.000088 |
| 0.000142 | AM_not_in_group | 0.000368 |
| 0.003073 | AM_not_in_group | 0.000052 |
| 0.010281 | AM_not_in_group | 0.00181  |
| 0.093074 | AM_not_in_group | 0.0009   |
| 0.093074 | AM_not_in_group | 0.0009   |
| 0.000098 | AM_not_in_group | 0.000118 |

diffusion\_prioritization\_ALL

|          |                 |          |
|----------|-----------------|----------|
| 0.000098 | AM_not_in_group | 0.000118 |
| 0.000098 | AM_not_in_group | 0.000118 |
| 0.000098 | AM_not_in_group | 0.000118 |
| 0.003417 | AM_not_in_group | 0.006812 |
| 0.000294 | AM_not_in_group | 0.001088 |
| 0.000035 | AM_not_in_group | 0.000322 |
| 0.003413 | AM_not_in_group | 0.002517 |
| 0.004674 | AM_not_in_group | 0.000741 |
| 0.004806 | AM_not_in_group | 0.00004  |
| 0.012221 | AM_not_in_group | 0.001174 |
| 0.014126 | AM_not_in_group | 0.029681 |
| 0.006009 | AM_not_in_group | 0.000488 |
| 0.006009 | AM_not_in_group | 0.000488 |
| 0.000496 | AM_not_in_group | 0.000118 |
| 0.007366 | AM_not_in_group | 0.000543 |
| 0.016416 | AM_not_in_group | 0.000119 |
| 0.025712 | AM_not_in_group | 0.006454 |
| 0.004153 | AM_not_in_group | 0.000442 |
| 0.167867 | AM_not_in_group | 0.000003 |
| 0.167867 | AM_not_in_group | 0.000003 |
| 0.167867 | AM_not_in_group | 0.000003 |
| 0.006953 | AM_not_in_group | 0.002443 |
| 0.006334 | AM_not_in_group | 0.368737 |
| 0.006889 | AM_not_in_group | 0.000987 |
| 0.006889 | AM_not_in_group | 0.000987 |
| 0.000761 | AM_not_in_group | 0.00174  |
| 1        | AM_not_in_group | 0.001187 |
| 0.00091  | AM_not_in_group | 0.000782 |
| 0.001927 | AM_not_in_group | 0.002807 |
| 0.001927 | AM_not_in_group | 0.002807 |

diffusion\_prioritization\_ALL

|          |                 |          |
|----------|-----------------|----------|
| 0.001927 | AM_not_in_group | 0.002807 |
| 0.003515 | AM_not_in_group | 0.008099 |
| 0.003068 | AM_not_in_group | 0.000756 |
| 0.003417 | AM_not_in_group | 0.000259 |
| 0.003417 | AM_not_in_group | 0.000259 |
| 0.003417 | AM_not_in_group | 0.000259 |
| 0.178681 | AM_not_in_group | 0.000087 |
| 0.178681 | AM_not_in_group | 0.000087 |
| 0.178681 | AM_not_in_group | 0.000087 |
| 0.001438 | AM_not_in_group | 0.001604 |
| 0.001438 | AM_not_in_group | 0.001604 |
| 0.009799 | AM_not_in_group | 0.00563  |
| 0.009799 | AM_not_in_group | 0.00563  |
| 0.009799 | AM_not_in_group | 0.00563  |
| 0.000271 | AM_not_in_group | 0.000126 |
| 0.000302 | AM_not_in_group | 0.000363 |
| 0.000302 | AM_not_in_group | 0.000363 |
| 0.004887 | AM_not_in_group | 0.000932 |
| 0.000132 | AM_not_in_group | 0.000342 |
| 0.0006   | AM_not_in_group | 0.000142 |
| 0.024776 | AM_not_in_group | 0.002661 |
| 1        | AM_not_in_group | 0.120194 |
| 0.000202 | AM_not_in_group | 0.075881 |
| 0.000872 | AM_not_in_group | 0.000749 |
| 0.000026 | AM_not_in_group | 0.000006 |
| 0.001567 | AM_not_in_group | 0.012413 |
| 0.022336 | AM_not_in_group | 0.008056 |
| 0.003747 | AM_not_in_group | 0.000456 |
| 0.000379 | AM_not_in_group | 0.000921 |
| 0.000881 | AM_not_in_group | 0.000322 |
| 0.000758 | AM_not_in_group | 0.001945 |
| 0.000758 | AM_not_in_group | 0.001945 |
| 0.000758 | AM_not_in_group | 0.001945 |
| 0.022895 | AM_not_in_group | 0.034154 |
| 0.000326 | AM_not_in_group | 0.000739 |
| 0.027968 | AM_not_in_group | 0.001897 |
| 0.001438 | AM_not_in_group | 0.000316 |

diffusion\_prioritization\_ALL

|          |                 |          |
|----------|-----------------|----------|
| 0.001438 | AM_not_in_group | 0.000316 |
| 0.001438 | AM_not_in_group | 0.000316 |
| 0.001438 | AM_not_in_group | 0.000316 |
| 0.003797 | AM_not_in_group | 0.000363 |
| 0.003797 | AM_not_in_group | 0.000363 |
| 0.001269 | AM_not_in_group | 0.000098 |
| 0.003674 | AM_not_in_group | 0.000376 |
| 0.00175  | AM_not_in_group | 0.000013 |
| 0.011422 | AM_not_in_group | 0.000692 |
| 0.000043 | AM_not_in_group | 0.000003 |
| 0.004403 | AM_not_in_group | 0.000724 |
| 0.004368 | AM_in_group     | 1        |
| 0.000826 | AM_not_in_group | 0.006519 |
| 0.010806 | AM_not_in_group | 0.013517 |
| 0.096438 | AM_in_group     | 1        |
| 0.096438 | AM_in_group     | 1        |
| 0.096438 | AM_in_group     | 1        |
| 0.096438 | AM_not_in_group | 0.070277 |
| 0.096438 | AM_not_in_group | 0.070277 |
| 0.096438 | AM_not_in_group | 0.070277 |
| 1        | AM_not_in_group | 0.070277 |
| 0.000969 | AM_not_in_group | 0.000462 |
| 0.006036 | AM_not_in_group | 0.002265 |
| 0.000841 | AM_not_in_group | 0.000344 |
| 0.000841 | AM_not_in_group | 0.000344 |
| 0.003428 | AM_not_in_group | 0.000013 |
| 0.00401  | AM_not_in_group | 0.000566 |
| 0.009858 | AM_not_in_group | 0.013313 |
| 0.002393 | AM_not_in_group | 0.002829 |
| 0.004288 | AM_not_in_group | 0.003428 |
| 0.000032 | AM_not_in_group | 0.000001 |
| 0.000252 | AM_not_in_group | 0.00175  |
| 0.009519 | AM_not_in_group | 0.000167 |

diffusion\_prioritization\_ALL

|          |                 |          |
|----------|-----------------|----------|
| 0.027373 | AM_in_group     | 1        |
| 0.027373 | AM_not_in_group | 0.041574 |
| 0.027373 | AM_not_in_group | 0.041574 |
| 0.000625 | AM_not_in_group | 0.000004 |
| 0.000625 | AM_not_in_group | 0.000004 |
| 0.000625 | AM_not_in_group | 0.000004 |
| 0.10692  | AM_not_in_group | 0.000833 |
| 0.00054  | AM_not_in_group | 0.000547 |
| 0.000024 | AM_not_in_group | 0.000006 |
| 0.000126 | AM_not_in_group | 0.000154 |
| 0.003271 | AM_not_in_group | 0.00199  |
| 0.005237 | AM_not_in_group | 0.000603 |
| 0.006367 | AM_not_in_group | 0.255766 |
| 0.001039 | AM_not_in_group | 0.000183 |
| 0.025543 | AM_not_in_group | 0.000272 |
| 0.000642 | AM_not_in_group | 0.011777 |
| 0.000642 | AM_not_in_group | 0.011777 |
| 0.00008  | AM_not_in_group | 0.000044 |

diffusion\_prioritization\_ALL

|          |                 |          |
|----------|-----------------|----------|
| 0.00008  | AM_not_in_group | 0.000044 |
| 0.006579 | AM_not_in_group | 0.000481 |
| 0.002805 | AM_not_in_group | 0.00666  |
| 0.000107 | AM_not_in_group | 0.000032 |
| 0.01105  | AM_not_in_group | 0.012939 |
| 0.000985 | AM_not_in_group | 0.011732 |
| 0.000849 | AM_not_in_group | 0.000473 |
| 0.000318 | AM_not_in_group | 0.007447 |
| 0.000172 | AM_not_in_group | 0.000093 |
| 0.000133 | AM_not_in_group | 0.000048 |
| 1        | AM_not_in_group | 0.061795 |
| 0.001066 | AM_not_in_group | 0.000011 |
| 0.000644 | AM_not_in_group | 0.001472 |
| 0.000218 | AM_not_in_group | 0.001767 |



## diffusion\_prioritization\_ALL

|          |                 |          |
|----------|-----------------|----------|
| 0.019116 | AM_not_in_group | 0.000002 |
| 0.00987  | AM_not_in_group | 0.023288 |
| 0.008854 | AM_not_in_group | 0.000155 |
| 0.000703 | AM_not_in_group | 0.001704 |
| 0.000703 | AM_not_in_group | 0.001704 |
| 0.000703 | AM_not_in_group | 0.001704 |
| 0.009106 | AM_not_in_group | 0.024389 |
| 0.004484 | AM_not_in_group | 0.004715 |
| 0.001891 | AM_not_in_group | 0.001001 |
| 0.000114 | AM_not_in_group | 0.000295 |
| 0.017067 | AM_not_in_group | 0.008952 |
| 0.000075 | AM_not_in_group | 0.000009 |
| 0.000093 | AM_not_in_group | 0.000081 |
| 0.00018  | AM_not_in_group | 0.000239 |
| 0.000091 | AM_not_in_group | 0.000003 |
| 0.025307 | AM_not_in_group | 0.000231 |
| 0.072062 | AM_not_in_group | 0.161155 |
| 0.02358  | AM_not_in_group | 0.000251 |
| 0.0061   | AM_not_in_group | 0.011386 |
| 0.00293  | AM_not_in_group | 0.031816 |
| 0.069444 | AM_not_in_group | 0.000714 |



diffusion\_prioritization\_ALL

|          |                 |          |
|----------|-----------------|----------|
| 0.000566 | AM_not_in_group | 0.000325 |
| 0.000566 | AM_not_in_group | 0.000325 |
| 1        | AM_not_in_group | 0.001577 |
| 0.002338 | AM_not_in_group | 0.000645 |
| 0.008235 | AM_not_in_group | 0.023571 |
| 0.003952 | AM_not_in_group | 0.004049 |
| 0.172135 | AM_not_in_group | 0.003476 |
| 0.002498 | AM_not_in_group | 0.009118 |
| 0.003628 | AM_not_in_group | 0.002934 |
| 0.003628 | AM_not_in_group | 0.002934 |
| 0.003628 | AM_not_in_group | 0.002934 |
| 1        | AM_not_in_group | 0.062014 |
| 0.003264 | AM_not_in_group | 0.008501 |
| 0.000321 | AM_not_in_group | 0.000229 |
| 0.000003 | AM_not_in_group | 0.000007 |
| 0.003353 | AM_not_in_group | 0.000036 |
| 0.000563 | AM_not_in_group | 0.000287 |
| 0.021099 | AM_not_in_group | 0.000024 |
| 0.017356 | AM_not_in_group | 0.000101 |
| 1        | AM_not_in_group | 0.001552 |
| 0.000984 | AM_not_in_group | 0.00001  |
| 0.000984 | AM_not_in_group | 0.00001  |
| 0.000984 | AM_not_in_group | 0.00001  |
| 0.00115  | AM_not_in_group | 0.002271 |
| 0.000329 | AM_not_in_group | 0.000357 |
| 0.00016  | AM_not_in_group | 0.000065 |
| 0.004613 | AM_not_in_group | 0.010522 |
| 0.003371 | AM_not_in_group | 0.019481 |
| 0.003371 | AM_not_in_group | 0.019481 |
| 0.003371 | AM_not_in_group | 0.019481 |
| 0.000411 | AM_not_in_group | 0.000138 |
| 0.000023 | AM_not_in_group | 0.000028 |
| 1        | AM_not_in_group | 0.000335 |
| 0.000636 | AM_not_in_group | 0.000101 |

## diffusion\_prioritization\_ALL

|          |                 |          |
|----------|-----------------|----------|
| 0.000636 | AM_not_in_group | 0.000101 |
| 0.003147 | AM_not_in_group | 0.000065 |
| 0.003147 | AM_not_in_group | 0.000065 |
| 0.003147 | AM_not_in_group | 0.000065 |
| 0.014704 | AM_not_in_group | 0.017508 |
| 1        | AM_not_in_group | 0.001975 |
| 0.057001 | AM_not_in_group | 0.001975 |
| 0.002736 | AM_not_in_group | 0.02971  |
| 0.000736 | AM_not_in_group | 0.00426  |
| 0.000337 | AM_not_in_group | 0.005578 |
| 0.000014 | AM_not_in_group | 0.000041 |
| 0.000152 | AM_not_in_group | 0.000288 |
| 0.000152 | AM_not_in_group | 0.000288 |
| 0.002746 | AM_not_in_group | 0.000885 |
| 0.000247 | AM_not_in_group | 0.000039 |
| 0.001007 | AM_not_in_group | 0.000216 |
| 0.003607 | AM_not_in_group | 0.009576 |
| 0.000003 | AM_not_in_group | 0.000006 |
| 0.000003 | AM_not_in_group | 0.000006 |
| 0.000612 | AM_not_in_group | 0.000097 |
| 0.024531 | AM_not_in_group | 0.624753 |
| 0.000296 | AM_not_in_group | 0.000211 |
| 0.001139 | AM_not_in_group | 0.00072  |
| 0.000246 | AM_not_in_group | 0.001503 |
| 0.00258  | AM_not_in_group | 0.001151 |
| 0.010404 | AM_not_in_group | 0.001534 |

diffusion\_prioritization\_ALL

|          |                 |          |
|----------|-----------------|----------|
| 0.00107  | AM_not_in_group | 0.002113 |
| 0.066719 | AM_not_in_group | 0.092876 |
| 1        | AM_not_in_group | 0.092876 |
| 0.066719 | AM_not_in_group | 0.092876 |
| 0.066719 | AM_not_in_group | 0.092876 |
| 0.066719 | AM_not_in_group | 0.092876 |
| 0.032548 | AM_not_in_group | 0.086595 |
| 0.012097 | AM_not_in_group | 0.015374 |
| 0.00017  | AM_not_in_group | 0.000029 |
| 0.040065 | AM_in_group     | 1        |
| 0.040065 | AM_in_group     | 1        |
| 0.040065 | AM_in_group     | 1        |
| 0.040065 | AM_not_in_group | 0.097507 |
| 0.040065 | AM_not_in_group | 0.097507 |
| 0.040065 | AM_not_in_group | 0.097507 |
| 0.007646 | AM_not_in_group | 0.000134 |
| 0.00315  | AM_not_in_group | 0.008941 |
| 0.00315  | AM_not_in_group | 0.008941 |
| 0.00315  | AM_not_in_group | 0.008941 |
| 0.008928 | AM_not_in_group | 0.022567 |
| 0.000079 | AM_not_in_group | 0.000077 |
| 0.000079 | AM_not_in_group | 0.000077 |
| 0.003471 | AM_not_in_group | 0.009151 |
| 0.007447 | AM_not_in_group | 0.000144 |
| 0.001498 | AM_not_in_group | 0.000268 |
| 0.000568 | AM_not_in_group | 0.000395 |
| 0.000021 | AM_not_in_group | 0.000026 |
| 0.000021 | AM_not_in_group | 0.000026 |
| 0.00494  | AM_not_in_group | 0.010176 |
| 0.001723 | AM_not_in_group | 0.000066 |
| 0.000064 | AM_not_in_group | 0.000035 |
| 0.005433 | AM_not_in_group | 0.000127 |
| 0.000026 | AM_not_in_group | 0.000034 |
| 0.000161 | AM_not_in_group | 0.000046 |
| 0.000136 | AM_not_in_group | 0.000199 |

diffusion\_prioritization\_ALL

|          |                 |          |
|----------|-----------------|----------|
| 0.013574 | AM_not_in_group | 0.016163 |
| 0.00059  | AM_not_in_group | 0.000063 |
| 0.0013   | AM_not_in_group | 0.003908 |
| 0.000085 | AM_not_in_group | 0.000026 |
| 0.000703 | AM_not_in_group | 0.000823 |
| 0.006639 | AM_not_in_group | 0.00034  |
| 0.006639 | AM_not_in_group | 0.00034  |
| 0.000088 | AM_not_in_group | 0.000063 |
| 0.000024 | AM_not_in_group | 0.006003 |
| 0.000503 | AM_not_in_group | 0.002475 |
| 0.000503 | AM_not_in_group | 0.002475 |
| 0.00034  | AM_not_in_group | 0.000027 |
| 0.00035  | AM_not_in_group | 0.000012 |
| 0.00035  | AM_not_in_group | 0.000012 |
| 0.000242 | AM_not_in_group | 0.000068 |
| 0.000286 | AM_not_in_group | 0.000084 |
| 0.006714 | AM_not_in_group | 0.00024  |
| 0.019729 | AM_not_in_group | 0.00442  |
| 0.001383 | AM_not_in_group | 0.000362 |
| 0.001678 | AM_not_in_group | 0.001047 |
| 0.0322   | AM_in_group     | 1        |
| 0.0322   | AM_in_group     | 1        |
| 0.0322   | AM_not_in_group | 0.180409 |
| 0.149814 | AM_in_group     | 1        |
| 0.149814 | AM_not_in_group | 0.131337 |
| 0.001492 | AM_not_in_group | 0.000863 |
| 0.002348 | AM_not_in_group | 0.001401 |
| 0.002348 | AM_not_in_group | 0.001401 |
| 0.002348 | AM_not_in_group | 0.001401 |
| 0.007711 | AM_not_in_group | 0.024155 |
| 0.000704 | AM_not_in_group | 0.000066 |
| 0.000347 | AM_not_in_group | 0.000814 |
| 0.000347 | AM_not_in_group | 0.000814 |
| 0.001518 | AM_not_in_group | 0.020427 |
| 0.000401 | AM_not_in_group | 0.001196 |
| 0.000401 | AM_not_in_group | 0.001196 |
| 0.058141 | AM_not_in_group | 0.083942 |
| 0.00242  | AM_not_in_group | 0.012514 |
| 0.000409 | AM_not_in_group | 0.00007  |
| 0.000409 | AM_not_in_group | 0.00007  |
| 0.000409 | AM_not_in_group | 0.00007  |

diffusion\_prioritization\_ALL

|          |                 |          |
|----------|-----------------|----------|
| 0.000409 | AM_not_in_group | 0.00007  |
| 0.000064 | AM_not_in_group | 0.00005  |
| 0.000037 | AM_not_in_group | 0.000013 |
| 0.002613 | AM_not_in_group | 0.000235 |
| 0.000289 | AM_not_in_group | 0.000148 |
| 0.000549 | AM_not_in_group | 0.000084 |
| 0.005254 | AM_not_in_group | 0.006828 |
| 0.007418 | AM_not_in_group | 0.000219 |
| 0.001569 | AM_not_in_group | 0.001133 |
| 0.003706 | AM_not_in_group | 0.006033 |
| 0.014331 | AM_not_in_group | 0.000818 |
| 0.008436 | AM_not_in_group | 0.023694 |
| 0.000671 | AM_not_in_group | 0.001271 |
| 0.012327 | AM_not_in_group | 0.013758 |
| 0.000512 | AM_not_in_group | 0.000356 |
| 0.000079 | AM_not_in_group | 0.000024 |
| 0.000103 | AM_not_in_group | 0.00167  |

## diffusion\_prioritization\_ALL

|          |                 |          |
|----------|-----------------|----------|
| 0.000429 | AM_not_in_group | 0.000142 |
| 0.000081 | AM_not_in_group | 0.000059 |
| 0.001243 | AM_not_in_group | 0.000594 |
| 0.002118 | AM_not_in_group | 0.000145 |
| 0.002118 | AM_not_in_group | 0.000145 |
| 0.002118 | AM_not_in_group | 0.000145 |
| 0.007795 | AM_not_in_group | 0.010564 |
| 0.000259 | AM_not_in_group | 0.000039 |
| 0.00123  | AM_not_in_group | 0.001792 |
| 0.000169 | AM_not_in_group | 0.001126 |
| 0.000169 | AM_not_in_group | 0.001126 |
| 0.002056 | AM_not_in_group | 0.000429 |
| 0.000964 | AM_not_in_group | 0.002185 |
| 0.000048 | AM_not_in_group | 0.000404 |
| 0.032511 | AM_in_group     | 1        |
| 0.032511 | AM_not_in_group | 0.072473 |
| 0.032511 | AM_not_in_group | 0.072473 |
| 0.000915 | AM_not_in_group | 0.000609 |
| 0.000915 | AM_not_in_group | 0.000609 |
| 0.000915 | AM_not_in_group | 0.000609 |
| 0.028592 | AM_in_group     | 1        |
| 0.000012 | AM_not_in_group | 0.000034 |
| 0.002763 | AM_not_in_group | 0.001226 |
| 0.002763 | AM_not_in_group | 0.001226 |
| 0.002763 | AM_not_in_group | 0.001226 |
| 0.000233 | AM_not_in_group | 0.001372 |
| 0.007641 | AM_not_in_group | 0.000099 |
| 0.019716 | AM_not_in_group | 0.108571 |
| 0.002475 | AM_not_in_group | 0.004876 |
| 0.000335 | AM_not_in_group | 0.000216 |
| 0.000289 | AM_not_in_group | 0.003094 |
| 0.000289 | AM_not_in_group | 0.003094 |

diffusion\_prioritization\_ALL

|          |                 |          |
|----------|-----------------|----------|
| 0.000289 | AM_not_in_group | 0.003094 |
| 0.000289 | AM_not_in_group | 0.003094 |
| 0.009155 | AM_not_in_group | 0.011946 |
| 0.002406 | AM_not_in_group | 0.000216 |
| 0.006303 | AM_not_in_group | 0.001152 |
| 0.000077 | AM_not_in_group | 0.000137 |
| 0.000077 | AM_not_in_group | 0.000137 |
| 0.000256 | AM_not_in_group | 0.000262 |
| 0.000648 | AM_not_in_group | 0.000529 |
| 0.000138 | AM_not_in_group | 0.000085 |
| 0.001707 | AM_not_in_group | 0.002953 |







diffusion\_prioritization\_ALL

|          |                 |          |
|----------|-----------------|----------|
| 0.000749 | AM_not_in_group | 0.000875 |
| 0.000749 | AM_not_in_group | 0.000875 |
| 0.000504 | AM_not_in_group | 0.000277 |
| 0.002307 | AM_not_in_group | 0.004355 |
| 0.007065 | AM_not_in_group | 0.001086 |
| 0.010135 | AM_not_in_group | 0.011598 |
| 0.003041 | AM_not_in_group | 0.000636 |
| 0.001645 | AM_not_in_group | 0.002845 |
| 0.000621 | AM_not_in_group | 0.000507 |
| 0.005796 | AM_not_in_group | 0.000763 |
| 0.00073  | AM_not_in_group | 0.000426 |
| 0.008384 | AM_not_in_group | 0.000674 |
| 0.011951 | AM_not_in_group | 0.000323 |
| 0.003936 | AM_not_in_group | 0.004418 |
| 0.000058 | AM_not_in_group | 0.000123 |

diffusion\_prioritization\_ALL

|          |                 |          |
|----------|-----------------|----------|
| 0.000058 | AM_not_in_group | 0.000123 |
| 0.023988 | AM_not_in_group | 0.001057 |
| 1        | AM_not_in_group | 0.001057 |
| 0.000088 | AM_not_in_group | 0.000032 |
| 0.041604 | AM_not_in_group | 0.069325 |
| 0.024647 | AM_not_in_group | 0.000524 |
| 0.001488 | AM_not_in_group | 0.000212 |
| 0.021708 | AM_not_in_group | 0.00181  |
| 0.001961 | AM_not_in_group | 0.001167 |
| 0.003181 | AM_not_in_group | 0.000304 |
| 1        | AM_not_in_group | 0.000964 |
| 0.001669 | AM_not_in_group | 0.000295 |
| 0.001669 | AM_not_in_group | 0.000295 |
| 0.001669 | AM_not_in_group | 0.000295 |
| 0.000173 | AM_not_in_group | 0.00004  |
| 0.003333 | AM_not_in_group | 0.001549 |
| 0.003333 | AM_not_in_group | 0.001549 |
| 0.083998 | AM_not_in_group | 0.024558 |
| 0.001364 | AM_not_in_group | 0.000552 |
| 0.000435 | AM_not_in_group | 0.000271 |
| 0.00002  | AM_not_in_group | 0.000001 |
| 0.020165 | AM_not_in_group | 0.001715 |
| 0.000377 | AM_not_in_group | 0.000303 |
| 0.000304 | AM_not_in_group | 0.000011 |
| 0.000304 | AM_not_in_group | 0.000011 |
| 0.000304 | AM_not_in_group | 0.000011 |
| 0.001897 | AM_not_in_group | 0.00112  |
| 0.060204 | AM_not_in_group | 0.001045 |

## diffusion\_prioritization\_ALL

|          |                 |          |
|----------|-----------------|----------|
| 0.011775 | AM_not_in_group | 0.00201  |
| 0.016994 | AM_not_in_group | 0.117338 |
| 0.000939 | AM_not_in_group | 0.000874 |
| 0.02203  | AM_not_in_group | 0.003847 |
| 0.006466 | AM_not_in_group | 0.000678 |
| 0.001425 | AM_not_in_group | 0.001721 |
| 0.000933 | AM_not_in_group | 0.000868 |
| 0.00088  | AM_not_in_group | 0.000383 |
| 0.00088  | AM_not_in_group | 0.000383 |
| 0.00088  | AM_not_in_group | 0.000383 |
| 0.000512 | AM_not_in_group | 0.000301 |
| 0.005744 | AM_not_in_group | 0.01454  |
| 0.017642 | AM_not_in_group | 0.001086 |
| 0.068042 | AM_not_in_group | 0.00105  |
| 0.000163 | AM_not_in_group | 0.000038 |
| 0.000163 | AM_not_in_group | 0.000038 |
| 0.000185 | AM_not_in_group | 0.002002 |
| 0.000185 | AM_not_in_group | 0.002002 |
| 0.008977 | AM_not_in_group | 0.023138 |
| 0.000321 | AM_not_in_group | 0.000067 |
| 0.000321 | AM_not_in_group | 0.000067 |
| 0.004442 | AM_not_in_group | 0.010798 |
| 0.004442 | AM_not_in_group | 0.010798 |
| 0.004442 | AM_not_in_group | 0.010798 |
| 0.000493 | AM_not_in_group | 0.000308 |
| 0.011036 | AM_not_in_group | 0.001415 |
| 0.009172 | AM_not_in_group | 0.028458 |
| 0.001102 | AM_not_in_group | 0.000238 |

## diffusion\_prioritization\_ALL

|          |                 |          |
|----------|-----------------|----------|
| 0.001102 | AM_not_in_group | 0.000238 |
| 0.000226 | AM_not_in_group | 0.000232 |
| 0.002413 | AM_not_in_group | 0.000657 |
| 0.000174 | AM_not_in_group | 0.00028  |
| 0.00032  | AM_not_in_group | 0.000043 |
| 0.015051 | AM_not_in_group | 0.00016  |
| 0.012788 | AM_not_in_group | 0.000455 |
| 0.005405 | AM_not_in_group | 0.000709 |
| 0.000016 | AM_not_in_group | 0.000054 |
| 0.00016  | AM_not_in_group | 0.000037 |
| 0.00016  | AM_not_in_group | 0.000037 |
| 0.000142 | AM_not_in_group | 0.000587 |
| 0.000848 | AM_not_in_group | 0.000369 |
| 0.004976 | AM_not_in_group | 0.001975 |

diffusion\_prioritization\_ALL

|          |                 |          |
|----------|-----------------|----------|
| 0.004976 | AM_not_in_group | 0.001975 |
| 0.006062 | AM_not_in_group | 0.024884 |
| 0.006062 | AM_not_in_group | 0.024884 |
| 0.001877 | AM_not_in_group | 0.001717 |
| 0.000577 | AM_not_in_group | 0.000151 |
| 0.001948 | AM_not_in_group | 0.000302 |
| 0.002986 | AM_not_in_group | 0.014472 |
| 0.002968 | AM_not_in_group | 0.000683 |
| 0.00007  | AM_not_in_group | 0.000182 |
| 0.00019  | AM_not_in_group | 0.001907 |
| 0.0004   | AM_not_in_group | 0.000052 |
| 0.0004   | AM_not_in_group | 0.000052 |
| 0.014575 | AM_not_in_group | 0.00134  |
| 0.001717 | AM_not_in_group | 0.000007 |
| 0.000134 | AM_not_in_group | 0.00018  |
| 0.016725 | AM_not_in_group | 0.003465 |
| 0.002654 | AM_not_in_group | 0.001053 |
| 0.000214 | AM_not_in_group | 0.00022  |
| 0.001744 | AM_not_in_group | 0.000344 |

## diffusion\_prioritization\_ALL

|          |                 |          |
|----------|-----------------|----------|
| 0.000628 | AM_not_in_group | 0.000007 |
| 0.010607 | AM_not_in_group | 0.001823 |
| 0.00408  | AM_not_in_group | 0.000063 |
| 0.003638 | AM_not_in_group | 0.002137 |
| 0.004892 | AM_not_in_group | 0.019722 |
| 0.000069 | AM_not_in_group | 0.000177 |
| 0.000069 | AM_not_in_group | 0.000177 |
| 1        | AM_not_in_group | 0.00071  |
| 0.00306  | AM_in_group     | 1        |
| 0.00306  | AM_not_in_group | 0.024597 |
| 0.000473 | AM_not_in_group | 0.000278 |
| 0.006861 | AM_not_in_group | 0.003513 |
| 0.137712 | AM_not_in_group | 0.029045 |
| 0.000797 | AM_not_in_group | 0.00014  |
| 0.000207 | AM_not_in_group | 0.000213 |

diffusion\_prioritization\_ALL

|          |                 |          |
|----------|-----------------|----------|
| 0.000207 | AM_not_in_group | 0.000213 |
| 0.000207 | AM_not_in_group | 0.000213 |
| 0.003141 | AM_not_in_group | 0.000815 |
| 0.00036  | AM_not_in_group | 0.001407 |
| 0.001216 | AM_not_in_group | 0.000484 |
| 0.000954 | AM_not_in_group | 0.000667 |
| 0.003211 | AM_not_in_group | 0.00964  |
| 0.003047 | AM_in_group     | 1        |
| 0.003047 | AM_in_group     | 1        |
| 0.00061  | AM_not_in_group | 0.000627 |
| 0.003957 | AM_not_in_group | 0.012481 |
| 0.089813 | AM_not_in_group | 0.0008   |
| 1        | AM_not_in_group | 0.124332 |
| 0.022279 | AM_in_group     | 1        |
| 0.000101 | AM_not_in_group | 0.000024 |
| 0.000101 | AM_not_in_group | 0.000024 |
| 0.014619 | AM_not_in_group | 0.000847 |
| 0.000993 | AM_not_in_group | 0.000215 |
| 0.000189 | AM_not_in_group | 0.000135 |
| 0.000709 | AM_not_in_group | 0.000654 |
| 0.001092 | AM_not_in_group | 0.001063 |
| 0.010227 | AM_not_in_group | 0.000059 |
| 0.000281 | AM_not_in_group | 0.000058 |
| 0.005303 | AM_not_in_group | 0.007399 |
| 0.015319 | AM_not_in_group | 0.001025 |
| 0.015319 | AM_not_in_group | 0.001025 |
| 0.000832 | AM_not_in_group | 0.000351 |
| 0.00688  | AM_not_in_group | 0.017749 |
| 0.00688  | AM_not_in_group | 0.017749 |
| 0.00688  | AM_not_in_group | 0.017749 |
| 0.000296 | AM_not_in_group | 0.002111 |
| 0.000296 | AM_not_in_group | 0.002111 |
| 0.000296 | AM_not_in_group | 0.002111 |
| 0.000012 | AM_not_in_group | 0.000003 |
| 0.000012 | AM_not_in_group | 0.000003 |
| 0.000168 | AM_not_in_group | 0.000351 |
| 0.012243 | AM_not_in_group | 0.000287 |
| 0.054122 | AM_not_in_group | 0.01119  |
| 0.000493 | AM_not_in_group | 0.000403 |
| 0.009107 | AM_not_in_group | 0.000339 |
| 0.009727 | AM_not_in_group | 0.025551 |
| 0.009727 | AM_not_in_group | 0.025551 |



diffusion\_prioritization\_ALL

|          |                 |          |
|----------|-----------------|----------|
| 0.009727 | AM_not_in_group | 0.025551 |
| 0.003916 | AM_not_in_group | 0.001547 |
| 0.000438 | AM_not_in_group | 0.000257 |
| 0.005121 | AM_not_in_group | 0.000356 |
| 0.000885 | AM_not_in_group | 0.000386 |
| 0.003044 | AM_not_in_group | 0.009119 |
| 0.000175 | AM_not_in_group | 0.004082 |
| 0.000014 | AM_not_in_group | 0.000017 |
| 0.001908 | AM_not_in_group | 0.000255 |
| 0.001908 | AM_not_in_group | 0.000255 |
| 0.001908 | AM_not_in_group | 0.000255 |
| 0.000537 | AM_not_in_group | 0.00322  |
| 0.000659 | AM_not_in_group | 0.000367 |
| 0.010464 | AM_not_in_group | 0.000394 |
| 0.010464 | AM_not_in_group | 0.000394 |
| 0.010464 | AM_not_in_group | 0.000394 |
| 0.0029   | AM_not_in_group | 0.000753 |

## diffusion\_prioritization\_ALL

|          |                 |          |
|----------|-----------------|----------|
| 0.0029   | AM_not_in_group | 0.000753 |
| 0.000353 | AM_not_in_group | 0.003408 |
| 0.000353 | AM_not_in_group | 0.003408 |
| 0.008664 | AM_not_in_group | 0.010317 |
| 0.005005 | AM_not_in_group | 0.006726 |
| 0.005005 | AM_not_in_group | 0.006726 |

## diffusion\_prioritization\_ALL

|          |                 |          |
|----------|-----------------|----------|
| 0.005005 | AM_not_in_group | 0.006726 |
| 0.005005 | AM_not_in_group | 0.006726 |
| 0.000268 | AM_not_in_group | 0.004801 |
| 0.007425 | AM_not_in_group | 0.000371 |
| 1        | AM_not_in_group | 0.000049 |
| 0.145159 | AM_not_in_group | 0.000049 |
| 1        | AM_not_in_group | 0.000049 |
| 1        | AM_not_in_group | 0.000049 |
| 1        | AM_not_in_group | 0.000049 |
| 0.145159 | AM_not_in_group | 0.000049 |
| 0.004701 | AM_not_in_group | 0.000082 |
| 0.001203 | AM_not_in_group | 0.000217 |
| 0.002233 | AM_not_in_group | 0.004375 |
| 0.002489 | AM_not_in_group | 0.000617 |
| 0.00146  | AM_not_in_group | 0.000023 |
| 0.000684 | AM_not_in_group | 0.00608  |
| 0.000684 | AM_not_in_group | 0.00608  |
| 0.000684 | AM_not_in_group | 0.00608  |
| 0.000764 | AM_not_in_group | 0.000381 |
| 0.003801 | AM_not_in_group | 0.001663 |
| 0.003801 | AM_not_in_group | 0.001663 |
| 0.005006 | AM_not_in_group | 0.000472 |
| 0.00458  | AM_not_in_group | 0.00008  |
| 0.00458  | AM_not_in_group | 0.00008  |
| 0.031102 | AM_not_in_group | 0.001662 |
| 0.002281 | AM_not_in_group | 0.00967  |
| 0.001008 | AM_not_in_group | 0.000982 |

## diffusion\_prioritization\_ALL

|          |                 |          |
|----------|-----------------|----------|
| 0.001008 | AM_not_in_group | 0.000982 |
| 0.000366 | AM_not_in_group | 0.00048  |
| 0.000366 | AM_not_in_group | 0.00048  |
| 0.007957 | AM_not_in_group | 0.015289 |
| 0.000676 | AM_not_in_group | 0.000321 |
| 0.007905 | AM_not_in_group | 0.000647 |
| 0.00417  | AM_not_in_group | 0.00067  |
| 0.000498 | AM_not_in_group | 0.000142 |
| 0.002748 | AM_in_group     | 1        |
| 0.002748 | AM_not_in_group | 0.009691 |

diffusion\_prioritization\_ALL

|          |                 |          |
|----------|-----------------|----------|
| 0.003766 | AM_not_in_group | 0.006732 |
| 0.0061   | AM_not_in_group | 0.018229 |
| 0.000161 | AM_not_in_group | 0.000056 |
| 0.000015 | AM_not_in_group | 0.00002  |
| 0.002295 | AM_not_in_group | 0.00133  |
| 0.000379 | AM_not_in_group | 0.000326 |
| 0.000379 | AM_not_in_group | 0.000326 |
| 0.000379 | AM_not_in_group | 0.000326 |
| 0.001335 | AM_not_in_group | 0.019357 |
| 0.002629 | AM_not_in_group | 0.000617 |
| 0.000462 | AM_not_in_group | 0.002286 |
| 0.000903 | AM_not_in_group | 0.000206 |
| 0.00005  | AM_not_in_group | 0.000015 |
| 0.000309 | AM_not_in_group | 0.000009 |
| 0.000283 | AM_not_in_group | 0.000239 |
| 0.000052 | AM_not_in_group | 0.000037 |
| 0.00088  | AM_not_in_group | 0.000145 |
| 0.00045  | AM_not_in_group | 0.000525 |
| 0.000324 | AM_not_in_group | 0.000226 |
| 0.004032 | AM_not_in_group | 0.001881 |
| 0.002614 | AM_not_in_group | 0.000678 |
| 0.000263 | AM_not_in_group | 0.000738 |
| 0.000034 | AM_not_in_group | 0.011628 |
| 0.002484 | AM_not_in_group | 0.01997  |
| 0.013116 | AM_not_in_group | 0.001134 |
| 0.001458 | AM_in_group     | 1        |
| 0.001458 | AM_not_in_group | 0.01561  |

## diffusion\_prioritization\_ALL

|          |                 |          |
|----------|-----------------|----------|
| 0.001458 | AM_not_in_group | 0.01561  |
| 0.000689 | AM_in_group     | 1        |
| 0.000689 | AM_not_in_group | 0.014888 |
| 0.005699 | AM_not_in_group | 0.001639 |
| 0.065466 | AM_not_in_group | 0.010039 |
| 0.000483 | AM_not_in_group | 0.000495 |
| 0.005814 | AM_not_in_group | 0.00017  |
| 0.000696 | AM_not_in_group | 0.000601 |
| 0.000696 | AM_not_in_group | 0.000601 |
| 0.000273 | AM_not_in_group | 0.000115 |
| 0.007079 | AM_not_in_group | 0.000668 |
| 0.003599 | AM_not_in_group | 0.006211 |
| 0.001536 | AM_not_in_group | 0.000138 |
| 0.001233 | AM_not_in_group | 0.017869 |
| 0.00061  | AM_not_in_group | 0.000612 |
| 0.000002 | AM_not_in_group | 0.000003 |
| 0.000002 | AM_not_in_group | 0.000003 |

diffusion\_prioritization\_ALL

|          |                 |          |
|----------|-----------------|----------|
| 0.001429 | AM_not_in_group | 0.000189 |
| 0.001429 | AM_not_in_group | 0.000189 |
| 0.007671 | AM_not_in_group | 0.223418 |
| 0.002757 | AM_not_in_group | 0.000545 |
| 0.000728 | AM_not_in_group | 0.000161 |
| 0.005227 | AM_not_in_group | 0.006274 |
| 0.000554 | AM_not_in_group | 0.001093 |
| 0.000554 | AM_not_in_group | 0.001093 |
| 1        | AM_not_in_group | 0.023935 |
| 0.000592 | AM_not_in_group | 0.000291 |
| 0.003357 | AM_not_in_group | 0.010899 |
| 1        | AM_not_in_group | 0.000041 |
| 0.003487 | AM_not_in_group | 0.000101 |
| 0.009475 | AM_not_in_group | 0.002378 |
| 0.000967 | AM_not_in_group | 0.000474 |
| 0.00032  | AM_not_in_group | 0.000038 |
| 0.011592 | AM_not_in_group | 0.000204 |
| 0.002163 | AM_not_in_group | 0.000141 |
| 0.144801 | AM_not_in_group | 0.000161 |
| 0.00105  | AM_not_in_group | 0.001816 |
| 0.001401 | AM_not_in_group | 0.000148 |

diffusion\_prioritization\_ALL

|          |                 |          |
|----------|-----------------|----------|
| 0.000029 | AM_not_in_group | 0.000126 |
| 0.008957 | AM_not_in_group | 0.000201 |
| 0.003355 | AM_not_in_group | 0.003207 |
| 0.000101 | AM_not_in_group | 0.000047 |
| 0.000101 | AM_not_in_group | 0.000047 |
| 0.00021  | AM_not_in_group | 0.003418 |
| 0.000268 | AM_not_in_group | 0.000613 |
| 0.000268 | AM_not_in_group | 0.000613 |
| 0.000222 | AM_not_in_group | 0.000125 |
| 0.004659 | AM_not_in_group | 0.000169 |
| 0.004659 | AM_not_in_group | 0.000169 |
| 0.000304 | AM_not_in_group | 0.000038 |
| 0.000712 | AM_not_in_group | 0.000042 |
| 0.003498 | AM_not_in_group | 0.000616 |
| 0.003498 | AM_not_in_group | 0.000616 |
| 0.003498 | AM_not_in_group | 0.000616 |
| 0.005532 | AM_in_group     | 1        |
| 0.005532 | AM_in_group     | 1        |
| 0.005532 | AM_not_in_group | 0.17524  |
| 0.005532 | AM_not_in_group | 0.17524  |
| 0.005532 | AM_not_in_group | 0.17524  |
| 0.021285 | AM_in_group     | 1        |
| 0.021285 | AM_not_in_group | 0.15625  |
| 0.000016 | AM_not_in_group | 0.000001 |
| 0.000016 | AM_not_in_group | 0.000001 |
| 0.000016 | AM_not_in_group | 0.000001 |
| 0.000137 | AM_not_in_group | 0.000047 |
| 0.000007 | AM_not_in_group | 0.000019 |
| 0.008747 | AM_not_in_group | 0.002196 |
| 0.008747 | AM_not_in_group | 0.002196 |
| 0.009345 | AM_not_in_group | 0.000919 |
| 0.001111 | AM_not_in_group | 0.000175 |



## diffusion\_prioritization\_ALL

|          |                 |          |
|----------|-----------------|----------|
| 0.001111 | AM_not_in_group | 0.000175 |
| 0.000847 | AM_not_in_group | 0.000227 |
| 0.003133 | AM_not_in_group | 0.000233 |
| 0.030592 | AM_not_in_group | 0.000488 |
| 0.003437 | AM_not_in_group | 0.001608 |
| 0.000269 | AM_not_in_group | 0.004394 |
| 0.001238 | AM_not_in_group | 0.000311 |
| 0.00024  | AM_not_in_group | 0.000114 |
| 0.000249 | AM_not_in_group | 0.000074 |
| 0.000715 | AM_not_in_group | 0.000045 |
| 0.000276 | AM_not_in_group | 0.000044 |
| 0.039847 | AM_not_in_group | 0.000311 |
| 0.001415 | AM_not_in_group | 0.000153 |
| 0.001415 | AM_not_in_group | 0.000153 |
| 0.00067  | AM_not_in_group | 0.000056 |
| 0.000753 | AM_not_in_group | 0.081968 |
| 0.000102 | AM_not_in_group | 0.000023 |

diffusion\_prioritization\_ALL

|          |                 |          |
|----------|-----------------|----------|
| 0.000541 | AM_not_in_group | 0.000236 |
| 0.00106  | AM_not_in_group | 0.000579 |
| 0.000362 | AM_not_in_group | 0.000423 |
| 0.000496 | AM_not_in_group | 0.000061 |
| 0.002615 | AM_not_in_group | 0.00552  |
| 0.007116 | AM_in_group     | 1        |
| 0.007116 | AM_in_group     | 1        |
| 0.007116 | AM_not_in_group | 0.019582 |
| 0.000391 | AM_not_in_group | 0.000426 |
| 0.003534 | AM_not_in_group | 0.005579 |



## diffusion\_prioritization\_ALL

|          |                 |          |
|----------|-----------------|----------|
| 0.003534 | AM_not_in_group | 0.005579 |
| 0.074677 | AM_not_in_group | 0.001083 |
| 0.002573 | AM_not_in_group | 0.000765 |
| 0.00371  | AM_not_in_group | 0.011621 |
| 0.001491 | AM_not_in_group | 0.000135 |
| 0.010223 | AM_in_group     | 1        |
| 0.010223 | AM_not_in_group | 0.030555 |
| 0.000029 | AM_not_in_group | 0.000016 |
| 0.013764 | AM_not_in_group | 0.001352 |
| 0.003364 | AM_not_in_group | 0.001527 |
| 0.001257 | AM_not_in_group | 0.000113 |
| 0.001257 | AM_not_in_group | 0.000113 |
| 0.002937 | AM_not_in_group | 0.004804 |
| 0.004568 | AM_not_in_group | 0.000336 |
| 0.000342 | AM_not_in_group | 0.00229  |
| 0.000302 | AM_not_in_group | 0.000177 |
| 0.00117  | AM_not_in_group | 0.00014  |
| 0.00023  | AM_not_in_group | 0.000082 |
| 0.000234 | AM_not_in_group | 0.000535 |
| 0.00636  | AM_not_in_group | 0.003336 |
| 0.000229 | AM_not_in_group | 0.000069 |
| 0.028491 | AM_not_in_group | 0.000359 |
| 0.000255 | AM_not_in_group | 0.00004  |
| 0.000255 | AM_not_in_group | 0.00004  |
| 0.005965 | AM_not_in_group | 0.024957 |

diffusion\_prioritization\_ALL

|          |                 |          |
|----------|-----------------|----------|
| 0.005965 | AM_not_in_group | 0.024957 |
| 0.000414 | AM_not_in_group | 0.00028  |
| 0.002295 | AM_not_in_group | 0.000993 |
| 0.000629 | AM_not_in_group | 0.000136 |
| 0.064151 | AM_not_in_group | 0.001295 |
| 0.000112 | AM_not_in_group | 0.00066  |
| 0.004092 | AM_not_in_group | 0.00029  |
| 0.000117 | AM_not_in_group | 0.000026 |
| 0.000031 | AM_not_in_group | 0.000005 |
| 0.000576 | AM_not_in_group | 0.000605 |
| 1        | AM_not_in_group | 0.001248 |
| 0.012707 | AM_not_in_group | 0.001248 |
| 0.000256 | AM_not_in_group | 0.000045 |
| 0.000587 | AM_not_in_group | 0.000076 |
| 0.000485 | AM_not_in_group | 0.000312 |
| 0.000274 | AM_not_in_group | 0.000036 |
| 0.001851 | AM_not_in_group | 0.00048  |
| 0.000178 | AM_not_in_group | 0.010342 |
| 0.009762 | AM_not_in_group | 0.001007 |
| 0.001226 | AM_not_in_group | 0.000192 |
| 0.001226 | AM_not_in_group | 0.000192 |
| 0.082269 | AM_not_in_group | 0.000887 |
| 1        | AM_not_in_group | 0.000887 |
| 0.003922 | AM_not_in_group | 0.000278 |

diffusion\_prioritization\_ALL

|          |                 |          |
|----------|-----------------|----------|
| 0.003922 | AM_not_in_group | 0.000278 |
| 0.000712 | AM_not_in_group | 0.00027  |
| 0.001143 | AM_not_in_group | 0.004426 |
| 0.000608 | AM_not_in_group | 0.00026  |
| 0.000051 | AM_not_in_group | 0.000071 |
| 0.007734 | AM_in_group     | 1        |
| 0.007734 | AM_not_in_group | 0.209851 |
| 0.007734 | AM_not_in_group | 0.209851 |
| 0.007734 | AM_not_in_group | 0.209851 |
| 0.007402 | AM_not_in_group | 0.001138 |
| 0.007402 | AM_not_in_group | 0.001138 |
| 0.00086  | AM_not_in_group | 0.000011 |
| 0.000417 | AM_not_in_group | 0.002241 |
| 0.007761 | AM_not_in_group | 0.000329 |
| 0.004138 | AM_not_in_group | 0.00204  |

diffusion\_prioritization\_ALL

|          |                 |          |
|----------|-----------------|----------|
| 0.004138 | AM_not_in_group | 0.00204  |
| 0.002695 | AM_not_in_group | 0.000416 |
| 0.005842 | AM_not_in_group | 0.000356 |
| 0.000643 | AM_not_in_group | 0.000627 |
| 0.001297 | AM_not_in_group | 0.000213 |
| 0.004479 | AM_not_in_group | 0.079296 |
| 0.000219 | AM_not_in_group | 0.003567 |
| 0.005971 | AM_not_in_group | 0.000341 |
| 0.005971 | AM_not_in_group | 0.000341 |
| 0.001033 | AM_not_in_group | 0.000036 |
| 0.000279 | AM_not_in_group | 0.00053  |

## diffusion\_prioritization\_ALL

|          |                 |          |
|----------|-----------------|----------|
| 0.000128 | AM_not_in_group | 0.000013 |
| 0.016068 | AM_not_in_group | 0.000246 |
| 1        | AM_not_in_group | 0.000246 |
| 0.016068 | AM_not_in_group | 0.000246 |
| 0.0001   | AM_not_in_group | 0.000511 |
| 0.000298 | AM_not_in_group | 0.000138 |
| 0.000157 | AM_not_in_group | 0.000033 |
| 0.000884 | AM_not_in_group | 0.000519 |
| 0.001792 | AM_not_in_group | 0.003942 |
| 0.004554 | AM_not_in_group | 0.000301 |
| 0.004554 | AM_not_in_group | 0.000301 |
| 0.006403 | AM_not_in_group | 0.000985 |
| 0.00034  | AM_not_in_group | 0.000044 |
| 0.004647 | AM_not_in_group | 0.000269 |
| 0.000245 | AM_not_in_group | 0.00009  |
| 0.002349 | AM_not_in_group | 0.090197 |
| 0.002349 | AM_not_in_group | 0.090197 |



## diffusion\_prioritization\_ALL

|          |                 |          |
|----------|-----------------|----------|
| 0.002349 | AM_not_in_group | 0.090197 |
| 0.000248 | AM_not_in_group | 0.000146 |
| 0.000115 | AM_not_in_group | 0.001903 |
| 0.000115 | AM_not_in_group | 0.001903 |
| 0.000597 | AM_not_in_group | 0.000112 |
| 0.001656 | AM_not_in_group | 0.00043  |
| 0.000144 | AM_not_in_group | 0.000033 |
| 0.000139 | AM_not_in_group | 0.00009  |
| 0.000139 | AM_not_in_group | 0.00009  |
| 0.000325 | AM_not_in_group | 0.000042 |

## diffusion\_prioritization\_ALL

|          |                 |          |
|----------|-----------------|----------|
| 0.000325 | AM_not_in_group | 0.000042 |
| 0.010973 | AM_not_in_group | 0.053224 |
| 0.00024  | AM_not_in_group | 0.002172 |
| 0.00024  | AM_not_in_group | 0.002172 |
| 0.00027  | AM_not_in_group | 0.000221 |
| 0.00027  | AM_not_in_group | 0.000221 |
| 0.00027  | AM_not_in_group | 0.000221 |
| 0.000375 | AM_not_in_group | 0.000146 |
| 0.000024 | AM_not_in_group | 0.000019 |
| 0.000787 | AM_not_in_group | 0.011406 |
| 0.000218 | AM_not_in_group | 0.001718 |
| 0.06266  | AM_not_in_group | 0.000181 |
| 0.000471 | AM_not_in_group | 0.000047 |
| 0.003452 | AM_not_in_group | 0.000017 |
| 0.000862 | AM_not_in_group | 0.009358 |
| 0.00085  | AM_not_in_group | 0.000483 |
| 0.000106 | AM_not_in_group | 0.001757 |
| 0.000106 | AM_not_in_group | 0.001757 |
| 0.000106 | AM_not_in_group | 0.001757 |
| 0.000141 | AM_not_in_group | 0.000031 |
| 0.002453 | AM_not_in_group | 0.000172 |
| 0.000133 | AM_not_in_group | 0.000031 |

diffusion\_prioritization\_ALL

|          |                 |          |
|----------|-----------------|----------|
| 0.000133 | AM_not_in_group | 0.000031 |
| 0.005473 | AM_in_group     | 1        |
| 0.005473 | AM_not_in_group | 0.15763  |
| 0.00287  | AM_not_in_group | 0.000174 |
| 0.006712 | AM_not_in_group | 0.001504 |
| 0.000008 | AM_not_in_group | 0        |
| 0.000008 | AM_not_in_group | 0        |

## diffusion\_prioritization\_ALL

|          |                 |          |
|----------|-----------------|----------|
| 0.000008 | AM_not_in_group | 0        |
| 0.000474 | AM_not_in_group | 0.000487 |
| 0.000133 | AM_not_in_group | 0.000011 |
| 0.000061 | AM_not_in_group | 0.000081 |
| 0.000646 | AM_not_in_group | 0.000025 |
| 0.000646 | AM_not_in_group | 0.000025 |
| 0.000053 | AM_not_in_group | 0.000009 |
| 0.011917 | AM_not_in_group | 0.00019  |
| 0.011917 | AM_not_in_group | 0.00019  |
| 0.000905 | AM_not_in_group | 0.000081 |
| 0.000522 | AM_not_in_group | 0.002145 |
| 0.000823 | AM_not_in_group | 0.004257 |
| 0.000823 | AM_not_in_group | 0.004257 |
| 0.000823 | AM_not_in_group | 0.004257 |
| 0.000395 | AM_not_in_group | 0.000197 |
| 0.000095 | AM_not_in_group | 0.000098 |
| 0.001556 | AM_not_in_group | 0.003205 |
| 0.001556 | AM_not_in_group | 0.003205 |
| 0.000386 | AM_not_in_group | 0.000461 |
| 0.005583 | AM_not_in_group | 0.001402 |
| 0.00005  | AM_not_in_group | 0.000215 |
| 0.000289 | AM_not_in_group | 0.000045 |
| 0.000146 | AM_not_in_group | 0.000048 |
| 0.000146 | AM_not_in_group | 0.000048 |
| 0.000619 | AM_not_in_group | 0.00107  |
| 0.000123 | AM_not_in_group | 0.000028 |
| 0.001333 | AM_not_in_group | 0.010714 |
| 0.040231 | AM_not_in_group | 0.000358 |
| 0.002592 | AM_not_in_group | 0.000377 |
| 0.015505 | AM_not_in_group | 0.025836 |

diffusion\_prioritization\_ALL

|          |                 |          |
|----------|-----------------|----------|
| 0.015505 | AM_not_in_group | 0.025836 |
| 0.015505 | AM_not_in_group | 0.025836 |
| 0.000029 | AM_not_in_group | 0.000076 |
| 0.000029 | AM_not_in_group | 0.000076 |
| 0.000029 | AM_not_in_group | 0.000076 |
| 0.000056 | AM_not_in_group | 0.000075 |
| 0.000255 | AM_not_in_group | 0.000034 |
| 0.003858 | AM_not_in_group | 0.003294 |
| 0.000303 | AM_not_in_group | 0.000047 |
| 0.031304 | AM_not_in_group | 0.009152 |
| 0.031304 | AM_not_in_group | 0.009152 |
| 0.031304 | AM_not_in_group | 0.009152 |
| 0.019521 | AM_not_in_group | 0.004033 |
| 0.004069 | AM_not_in_group | 0.000162 |
| 0.174918 | AM_not_in_group | 0.000022 |
| 0.00035  | AM_not_in_group | 0.000326 |
| 0.001265 | AM_not_in_group | 0.000297 |
| 0.000721 | AM_not_in_group | 0.000042 |

diffusion\_prioritization\_ALL

|          |                 |          |
|----------|-----------------|----------|
| 0.000119 | AM_not_in_group | 0.000026 |
| 0.000068 | AM_not_in_group | 0.000154 |
| 0.000069 | AM_not_in_group | 0.000153 |
| 0.006091 | AM_not_in_group | 0.000353 |
| 0.006091 | AM_not_in_group | 0.000353 |
| 0.000724 | AM_not_in_group | 0.000233 |
| 0.000146 | AM_not_in_group | 0.000044 |
| 0.000156 | AM_not_in_group | 0.000109 |
| 0.000156 | AM_not_in_group | 0.000109 |
| 0.000163 | AM_not_in_group | 0.000026 |
| 0.000502 | AM_not_in_group | 0.00019  |
| 0.000319 | AM_not_in_group | 0.000139 |
| 0.000862 | AM_not_in_group | 0.000133 |
| 0.000862 | AM_not_in_group | 0.000133 |
| 0.000097 | AM_not_in_group | 0.000086 |
| 0.000509 | AM_not_in_group | 0.000051 |

diffusion\_prioritization\_ALL

|          |                 |          |
|----------|-----------------|----------|
| 0.000509 | AM_not_in_group | 0.000051 |
| 0.002231 | AM_not_in_group | 0.000031 |
| 0.000221 | AM_not_in_group | 0.002934 |
| 0.000333 | AM_not_in_group | 0.000398 |
| 0.003478 | AM_not_in_group | 0.002969 |
| 0.00009  | AM_not_in_group | 0.000026 |
| 0.002753 | AM_not_in_group | 0.008227 |
| 0.00013  | AM_not_in_group | 0.000359 |
| 0.008111 | AM_not_in_group | 0.000797 |
| 0.000113 | AM_not_in_group | 0.000114 |
| 0.001959 | AM_not_in_group | 0.000034 |
| 0.001959 | AM_not_in_group | 0.000034 |
| 0.001959 | AM_not_in_group | 0.000034 |
| 0.000149 | AM_not_in_group | 0.000026 |
| 0.000199 | AM_not_in_group | 0.000233 |
| 0.000135 | AM_not_in_group | 0.000363 |

## diffusion\_prioritization\_ALL

|          |                 |          |
|----------|-----------------|----------|
| 0.000135 | AM_not_in_group | 0.000363 |
| 0.001678 | AM_not_in_group | 0.000049 |
| 0.000253 | AM_not_in_group | 0.000146 |
| 0.000037 | AM_not_in_group | 0.013982 |
| 0.000204 | AM_not_in_group | 0.002708 |
| 0.000099 | AM_not_in_group | 0.000023 |
| 0.000098 | AM_not_in_group | 0.000023 |
| 0.002542 | AM_not_in_group | 0.007595 |
| 0.000617 | AM_not_in_group | 0.00012  |
| 0.000376 | AM_not_in_group | 0.000086 |
| 0.000376 | AM_not_in_group | 0.000086 |
| 0.000619 | AM_not_in_group | 0.00012  |





diffusion\_prioritization\_ALL

|          |                 |          |
|----------|-----------------|----------|
| 0.000619 | AM_not_in_group | 0.00012  |
| 0.000027 | AM_not_in_group | 0.00044  |
| 0.000026 | AM_not_in_group | 0.000009 |
| 0.000746 | AM_not_in_group | 0.000248 |
| 0.092902 | AM_not_in_group | 0.000284 |
| 0.000159 | AM_not_in_group | 0.000093 |
| 0.005463 | AM_in_group     | 1        |
| 0.005463 | AM_in_group     | 1        |
| 0.005463 | AM_not_in_group | 0.139144 |
| 0.005463 | AM_not_in_group | 0.139144 |
| 0.000063 | AM_not_in_group | 0.00151  |

diffusion\_prioritization\_ALL

|          |                 |          |
|----------|-----------------|----------|
| 0.000034 | AM_in_group     | 1        |
| 0.000034 | AM_not_in_group | 0.012908 |
| 0.000026 | AM_not_in_group | 0.000424 |
| 0.000415 | AM_not_in_group | 0.000225 |
| 0.000399 | AM_not_in_group | 0.000274 |
| 0.000195 | AM_not_in_group | 0.0002   |
| 0.000195 | AM_not_in_group | 0.0002   |
| 0.000036 | AM_not_in_group | 0.000022 |
| 0.001399 | AM_not_in_group | 0.004541 |
| 0.001399 | AM_not_in_group | 0.004541 |
| 0.000575 | AM_not_in_group | 0.000185 |
| 0.006747 | AM_not_in_group | 0.177654 |
| 0.00031  | AM_not_in_group | 0.000349 |
| 0.004055 | AM_not_in_group | 0.000126 |
| 0.000094 | AM_not_in_group | 0.000096 |
| 0.000153 | AM_not_in_group | 0.000153 |
| 0.000713 | AM_not_in_group | 0.000216 |
| 0.000713 | AM_not_in_group | 0.000216 |
| 0.000713 | AM_not_in_group | 0.000216 |
| 0.000062 | AM_not_in_group | 0.000009 |
| 0.000068 | AM_not_in_group | 0.001121 |

diffusion\_prioritization\_ALL

|          |                 |          |
|----------|-----------------|----------|
| 0.000068 | AM_not_in_group | 0.001121 |
| 0.004399 | AM_not_in_group | 0.014    |
| 0.000085 | AM_not_in_group | 0.00002  |
| 0.000157 | AM_not_in_group | 0.000015 |
| 0.00018  | AM_not_in_group | 0.000184 |
| 0.000031 | AM_not_in_group | 0.011635 |
| 0.000117 | AM_not_in_group | 0.001914 |
| 0.003286 | AM_not_in_group | 0.000338 |
| 0.001327 | AM_not_in_group | 0.003173 |
| 0.000535 | AM_not_in_group | 0.000325 |
| 0.000105 | AM_not_in_group | 0.001251 |
| 0.000303 | AM_not_in_group | 0.000065 |
| 0.000303 | AM_not_in_group | 0.000065 |
| 0.000158 | AM_not_in_group | 0.00208  |
| 0.000158 | AM_not_in_group | 0.00208  |
| 0.000073 | AM_not_in_group | 0.000015 |
| 0.00052  | AM_not_in_group | 0.0001   |
| 0.000053 | AM_not_in_group | 0.00053  |
| 0.000507 | AM_not_in_group | 0.000098 |
| 0.000514 | AM_not_in_group | 0.000313 |
| 0.000598 | AM_not_in_group | 0.000197 |
| 0.000003 | AM_not_in_group | 0.000008 |
| 0.004688 | AM_not_in_group | 0.083624 |
| 0.000209 | AM_not_in_group | 0.009568 |
| 0.000036 | AM_not_in_group | 0.000048 |
| 0.00531  | AM_not_in_group | 0.001092 |
| 0.000145 | AM_not_in_group | 0.000015 |
| 0.003376 | AM_not_in_group | 0.000363 |

diffusion\_prioritization\_ALL

|          |                 |          |
|----------|-----------------|----------|
| 0.000139 | AM_not_in_group | 0.002796 |
| 0.000075 | AM_not_in_group | 0.000016 |
| 0.000002 | AM_not_in_group | 0.000007 |
| 0.000002 | AM_not_in_group | 0.000007 |
| 0.000002 | AM_not_in_group | 0.000007 |
| 0.000071 | AM_not_in_group | 0.000008 |
| 0.003985 | AM_not_in_group | 0.021944 |
| 0.001705 | AM_not_in_group | 0.000121 |
| 0.001705 | AM_not_in_group | 0.000121 |
| 0.001705 | AM_not_in_group | 0.000121 |
| 0.000797 | AM_not_in_group | 0.000207 |
| 0.000797 | AM_not_in_group | 0.000207 |
| 0.000011 | AM_not_in_group | 0.000006 |
| 0.00062  | AM_not_in_group | 0.000018 |
| 0.00062  | AM_not_in_group | 0.001215 |
| 0.000277 | AM_not_in_group | 0.030207 |
| 0.000091 | AM_not_in_group | 0.000003 |
| 0.000959 | AM_not_in_group | 0.000285 |
| 0.002203 | AM_not_in_group | 0.001881 |
| 0.002685 | AM_not_in_group | 0.000245 |
| 0.000868 | AM_not_in_group | 0.000172 |
| 0.000868 | AM_not_in_group | 0.000172 |
| 0.000868 | AM_not_in_group | 0.000172 |
| 0.005135 | AM_not_in_group | 0.000109 |



diffusion\_prioritization\_ALL

|          |                 |          |
|----------|-----------------|----------|
| 0.000759 | AM_not_in_group | 0.000238 |
| 0.000759 | AM_not_in_group | 0.000238 |
| 0.000205 | AM_not_in_group | 0.000245 |
| 0.003012 | AM_not_in_group | 0.000323 |
| 0.00416  | AM_not_in_group | 0.000251 |
| 0.000143 | AM_not_in_group | 0.000019 |
| 0.000256 | AM_not_in_group | 0.027886 |
| 0.000256 | AM_not_in_group | 0.027886 |
| 0.000256 | AM_not_in_group | 0.027886 |
| 0.000127 | AM_not_in_group | 0.000007 |
| 0.00013  | AM_not_in_group | 0.001729 |
| 0.001099 | AM_not_in_group | 0.000177 |

diffusion\_prioritization\_ALL

|          |                 |          |
|----------|-----------------|----------|
| 0.001099 | AM_not_in_group | 0.000177 |
| 0.000441 | AM_not_in_group | 0.000084 |
| 0.001622 | AM_not_in_group | 0.004848 |
| 0.00075  | AM_not_in_group | 0.000261 |
| 0.000366 | AM_not_in_group | 0.000215 |
| 0.000141 | AM_not_in_group | 0.000018 |
| 0.000141 | AM_not_in_group | 0.000018 |
| 0.000141 | AM_not_in_group | 0.000018 |
| 0.000119 | AM_not_in_group | 0.000097 |
| 0.000247 | AM_not_in_group | 0.17179  |
| 0.00001  | AM_not_in_group | 0.000005 |
| 0.002793 | AM_not_in_group | 0.0003   |
| 0.00019  | AM_not_in_group | 0.000095 |
| 0.00019  | AM_not_in_group | 0.000095 |
| 0.006375 | AM_not_in_group | 0.000218 |
| 0.000684 | AM_not_in_group | 0.000215 |
| 0.006234 | AM_not_in_group | 0.000185 |
| 0.00008  | AM_not_in_group | 0.000182 |
| 0.000771 | AM_not_in_group | 0.000169 |
| 0.00065  | AM_not_in_group | 0.000203 |
| 0.00065  | AM_not_in_group | 0.000203 |
| 0.000017 | AM_not_in_group | 0.000271 |
| 0.000022 | AM_not_in_group | 0.008239 |
| 0.007773 | AM_not_in_group | 0.001124 |
| 0.106559 | AM_not_in_group | 0.000288 |
| 0.000334 | AM_not_in_group | 0.000182 |
| 0.019356 | AM_not_in_group | 0.000172 |





## diffusion\_prioritization\_ALL

|          |                 |          |
|----------|-----------------|----------|
| 0.00025  | AM_not_in_group | 0.000067 |
| 0.000165 | AM_not_in_group | 0.000106 |
| 0.002524 | AM_not_in_group | 0.000271 |
| 0.000093 | AM_not_in_group | 0.000055 |
| 0.001394 | AM_not_in_group | 0.000007 |
| 0.000761 | AM_not_in_group | 0.000227 |
| 0.000115 | AM_not_in_group | 0.000118 |
| 0.000115 | AM_not_in_group | 0.000118 |
| 0.00002  | AM_not_in_group | 0.00737  |
| 0.000703 | AM_not_in_group | 0.000213 |
| 0.000056 | AM_not_in_group | 0.000057 |
| 0.000587 | AM_not_in_group | 0.000184 |
| 0.001636 | AM_not_in_group | 0.000154 |
| 0.001286 | AM_not_in_group | 0.000006 |
| 0.001286 | AM_not_in_group | 0.000006 |
| 0.000067 | AM_not_in_group | 0.000153 |
| 0.000032 | AM_not_in_group | 0.000067 |
| 0.006607 | AM_not_in_group | 0.000021 |
| 0.072883 | AM_not_in_group | 0.000009 |
| 0.072883 | AM_not_in_group | 0.000009 |
| 0.000128 | AM_not_in_group | 0.00005  |
| 0.000002 | AM_not_in_group | 0.000004 |
| 0.00003  | AM_not_in_group | 0.000062 |

diffusion\_prioritization\_ALL

|          |                 |          |
|----------|-----------------|----------|
| 0.000966 | AM_not_in_group | 0.000141 |
| 0.000966 | AM_not_in_group | 0.000141 |
| 0.000966 | AM_not_in_group | 0.000141 |
| 0.000491 | AM_not_in_group | 0.003948 |
| 0.000274 | AM_not_in_group | 0.000054 |
| 0.000088 | AM_not_in_group | 0.000041 |
| 0.000064 | AM_not_in_group | 0.000011 |
| 0.066704 | AM_not_in_group | 0.000009 |
| 0.0002   | AM_not_in_group | 0.000108 |
| 0.000284 | AM_not_in_group | 0.000091 |
| 0.000867 | AM_not_in_group | 0.000054 |
| 0.000453 | AM_not_in_group | 0.003645 |
| 0.000043 | AM_not_in_group | 0.000001 |
| 0.000253 | AM_not_in_group | 0.000005 |
| 0.000261 | AM_not_in_group | 0.000051 |
| 0.000187 | AM_not_in_group | 0.000046 |
| 0.000163 | AM_not_in_group | 0.0178   |
| 0.000028 | AM_not_in_group | 0.000006 |

diffusion\_prioritization\_ALL

|          |                 |          |
|----------|-----------------|----------|
| 0.000028 | AM_not_in_group | 0.000006 |
| 0.000036 | AM_not_in_group | 0.000032 |
| 0.000036 | AM_not_in_group | 0.000032 |
| 0.000036 | AM_not_in_group | 0.000032 |
| 0.000103 | AM_not_in_group | 0.000016 |
| 0.000103 | AM_not_in_group | 0.000016 |
| 0.000103 | AM_not_in_group | 0.000016 |
| 0.000033 | AM_not_in_group | 0.00001  |
| 0.000033 | AM_not_in_group | 0.00001  |
| 0.000033 | AM_not_in_group | 0.00001  |
| 0.000205 | AM_not_in_group | 0.000111 |
| 0.000042 | AM_not_in_group | 0.000009 |
| 0.006641 | AM_not_in_group | 0.001372 |
| 0.000157 | AM_in_group     | 1        |
| 0.000419 | AM_not_in_group | 0.000014 |
| 0.000091 | AM_not_in_group | 0.000014 |
| 0.000101 | AM_not_in_group | 0.000006 |
| 0.001976 | AM_not_in_group | 0.00629  |
| 0.000433 | AM_not_in_group | 0.000136 |
| 0.000423 | AM_not_in_group | 0.007761 |
| 0.002811 | AM_in_group     | 1        |
| 0.002811 | AM_not_in_group | 0.074022 |
| 0.002811 | AM_not_in_group | 0.074022 |
| 0.000623 | AM_not_in_group | 0.000096 |
| 0.000036 | AM_not_in_group | 0.000008 |
| 0.000544 | AM_not_in_group | 0.000089 |
| 0.000232 | AM_not_in_group | 0.000141 |
| 0.000035 | AM_not_in_group | 0.000008 |
| 0.020402 | AM_in_group     | 1        |

## diffusion\_prioritization\_ALL

|          |                 |          |
|----------|-----------------|----------|
| 0.000103 | AM_not_in_group | 0.000031 |
| 0.00001  | AM_not_in_group | 0.000159 |
| 0.001496 | AM_not_in_group | 0.000161 |
| 0.000214 | AM_not_in_group | 0.00013  |
| 0.000214 | AM_not_in_group | 0.00013  |
| 0.00106  | AM_not_in_group | 0.000905 |
| 0.00106  | AM_not_in_group | 0.000905 |
| 0.000821 | AM_not_in_group | 0.000004 |
| 0.000063 | AM_not_in_group | 0.000073 |
| 0.009356 | AM_not_in_group | 0.001435 |
| 1        | AM_not_in_group | 0.001435 |
| 0.009356 | AM_not_in_group | 0.001435 |
| 0.000061 | AM_not_in_group | 0.000003 |
| 0.000043 | AM_not_in_group | 0.000705 |
| 0.000176 | AM_not_in_group | 0.000103 |
| 0.000786 | AM_not_in_group | 0.000023 |

## diffusion\_prioritization\_ALL

|          |                 |          |
|----------|-----------------|----------|
| 0.000786 | AM_not_in_group | 0.000023 |
| 1        | AM_not_in_group | 0.000143 |
| 0.000005 | AM_not_in_group | 0.000003 |
| 0.000005 | AM_not_in_group | 0.000003 |
| 0.000005 | AM_not_in_group | 0.000003 |
| 0.005911 | AM_not_in_group | 0.000109 |
| 0.000165 | AM_not_in_group | 0.000097 |
| 0.00004  | AM_not_in_group | 0.000651 |
| 0.000085 | AM_not_in_group | 0.000102 |
| 0.000085 | AM_not_in_group | 0.000102 |
| 0.000085 | AM_not_in_group | 0.000102 |
| 0.000619 | AM_not_in_group | 0.000018 |
| 0.000619 | AM_not_in_group | 0.000018 |
| 0.000036 | AM_not_in_group | 0.000083 |
| 0.000039 | AM_not_in_group | 0.000007 |
| 0.000289 | AM_not_in_group | 0.002327 |
| 0.000368 | AM_not_in_group | 0.00011  |
| 0.000161 | AM_not_in_group | 0.000032 |
| 0.000004 | AM_not_in_group | 0.000002 |
| 0.000004 | AM_not_in_group | 0.000002 |
| 0.000009 | AM_not_in_group | 0.003546 |
| 0.000009 | AM_not_in_group | 0.003546 |
| 0.000036 | AM_not_in_group | 0.000006 |



diffusion\_prioritization\_ALL

|          |                 |          |
|----------|-----------------|----------|
| 0.000048 | AM_not_in_group | 0.000006 |
| 0.000004 | AM_not_in_group | 0.000002 |
| 0.000049 | AM_not_in_group | 0.000006 |
| 0.000291 | AM_not_in_group | 0.000126 |
| 0.000137 | AM_not_in_group | 0.000083 |
| 0.000938 | AM_not_in_group | 0.000101 |
| 0.000021 | AM_not_in_group | 0.000021 |
| 0.000208 | AM_not_in_group | 0.000066 |
| 0.000208 | AM_not_in_group | 0.000066 |
| 0.000025 | AM_not_in_group | 0.000416 |
| 0.008057 | AM_not_in_group | 0.000023 |
| 1        | AM_not_in_group | 0.000023 |
| 0.008057 | AM_not_in_group | 0.000023 |



## diffusion\_prioritization\_ALL

|          |                 |          |
|----------|-----------------|----------|
| 0.008057 | AM_not_in_group | 0.000023 |
| 0.000018 | AM_not_in_group | 0.000004 |
| 0.000018 | AM_not_in_group | 0.000004 |
| 0.000018 | AM_not_in_group | 0.000004 |
| 0.000161 | AM_not_in_group | 0.000049 |
| 0.000262 | AM_not_in_group | 0.000043 |
| 0.000222 | AM_not_in_group | 0.000067 |
| 0.000116 | AM_not_in_group | 0.000022 |
| 0.000261 | AM_not_in_group | 0.000623 |
| 0.000023 | AM_not_in_group | 0.000004 |
| 0.134284 | AM_not_in_group | 0.000076 |
| 0.00002  | AM_not_in_group | 0.000233 |

## diffusion\_prioritization\_ALL

|          |                 |          |
|----------|-----------------|----------|
| 0.00002  | AM_not_in_group | 0.000233 |
| 0.000097 | AM_not_in_group | 0.000019 |
| 0.000097 | AM_not_in_group | 0.000019 |
| 0.000097 | AM_not_in_group | 0.000019 |
| 0.000097 | AM_not_in_group | 0.000031 |
| 0.000097 | AM_not_in_group | 0.000031 |
| 0.000237 | AM_not_in_group | 0.000566 |
| 0.000038 | AM_not_in_group | 0.000002 |
| 0.000038 | AM_not_in_group | 0.000002 |
| 0.000038 | AM_not_in_group | 0.000002 |
| 0.000186 | AM_not_in_group | 0.00008  |
| 0.000089 | AM_not_in_group | 0.000029 |
| 0.000218 | AM_not_in_group | 0.000522 |
| 0.000018 | AM_not_in_group | 0.00021  |
| 0.000088 | AM_not_in_group | 0.000017 |
| 0.020664 | AM_not_in_group | 0.000003 |
| 0.000002 | AM_not_in_group | 0.000001 |
| 0.000017 | AM_not_in_group | 0.000201 |
| 0.000327 | AM_not_in_group | 0.00001  |
| 0.000622 | AM_not_in_group | 0.001981 |
| 0.000016 | AM_not_in_group | 0.000188 |
| 0.000558 | AM_not_in_group | 0.00006  |
| 0.000016 | AM_not_in_group | 0.000037 |
| 0.000133 | AM_not_in_group | 0.002445 |

diffusion\_prioritization\_ALL

|          |                 |          |
|----------|-----------------|----------|
| 0.000067 | AM_not_in_group | 0.000039 |
| 0.000015 | AM_not_in_group | 0.000034 |
| 0.000015 | AM_not_in_group | 0.000034 |
| 0.000058 | AM_not_in_group | 0.000032 |
| 0.006426 | AM_not_in_group | 0.115554 |
| 0.000819 | AM_not_in_group | 0.014766 |
| 0.000062 | AM_not_in_group | 0.000036 |
| 0.000062 | AM_not_in_group | 0.000036 |
| 0.000062 | AM_not_in_group | 0.000036 |
| 0.000054 | AM_not_in_group | 0.000029 |
| 0.005269 | AM_not_in_group | 0.094746 |
| 0.000137 | AM_not_in_group | 0.000041 |
| 0.00275  | AM_not_in_group | 0.049472 |
| 0.06406  | AM_not_in_group | 0.094581 |
| 0.000057 | AM_not_in_group | 0.000018 |
| 0.000057 | AM_not_in_group | 0.000018 |
| 0.000011 | AM_not_in_group | 0.000133 |
| 0.01319  | AM_not_in_group | 0.000002 |
| 0.00009  | AM_not_in_group | 0.000003 |
| 0.00013  | AM_not_in_group | 0.00031  |
| 0.00001  | AM_not_in_group | 0.000124 |
| 0.00011  | AM_not_in_group | 0.000047 |
| 0.000126 | AM_not_in_group | 0.000301 |
| 0.000039 | AM_not_in_group | 0.000023 |
| 0.000042 | AM_not_in_group | 0.000008 |
| 0.000007 | AM_not_in_group | 0.000002 |
| 0.000072 | AM_not_in_group | 0.000002 |
| 0.000007 | AM_not_in_group | 0.000002 |
| 0.000007 | AM_not_in_group | 0.000002 |
| 0.000007 | AM_not_in_group | 0.000002 |



diffusion\_prioritization\_ALL

|          |                 |          |
|----------|-----------------|----------|
| 0.000008 | AM_not_in_group | 0.000018 |
| 0.000008 | AM_not_in_group | 0.000018 |
| 0.000001 | AM_not_in_group | 0        |
| 0.000001 | AM_not_in_group | 0        |
| 0.000001 | AM_not_in_group | 0        |
| 0.046891 | AM_not_in_group | 0.000027 |
| 0.000028 | AM_not_in_group | 0.000015 |
| 0.000028 | AM_not_in_group | 0.000015 |
| 0.000005 | AM_not_in_group | 0.000001 |
| 0.007772 | AM_not_in_group | 0.000001 |
| 0.00008  | AM_not_in_group | 0.00019  |
| 0.000005 | AM_not_in_group | 0.000064 |
| 0.000005 | AM_not_in_group | 0.000064 |
| 0.000112 | AM_not_in_group | 0.000003 |
| 0.17801  | AM_not_in_group | 0.042367 |
| 0.028695 | AM_not_in_group | 0.042367 |
| 0.000103 | AM_not_in_group | 0.000003 |
| 0.026692 | AM_not_in_group | 0.039409 |
| 0.000005 | AM_not_in_group | 0.000055 |
| 0.001025 | AM_not_in_group | 0.018437 |
| 0.001025 | AM_not_in_group | 0.018437 |
| 0.001025 | AM_not_in_group | 0.018437 |
| 0.000004 | AM_not_in_group | 0.000052 |
| 0.000004 | AM_not_in_group | 0.000052 |
| 0.000004 | AM_not_in_group | 0.000052 |
| 0.000022 | AM_not_in_group | 0.000004 |
| 0.000036 | AM_not_in_group | 0.000001 |
| 0.027803 | AM_not_in_group | 0.000016 |
| 0.00002  | AM_not_in_group | 0.000004 |
| 0.000048 | AM_not_in_group | 0.000115 |
| 0.000004 | AM_not_in_group | 0.000045 |
| 0.000003 | AM_not_in_group | 0.000001 |
| 0.000066 | AM_not_in_group | 0.000002 |
| 0.000038 | AM_not_in_group | 0.000092 |
| 0.000038 | AM_not_in_group | 0.000092 |
| 0.013806 | AM_not_in_group | 0.020384 |
| 0.085645 | AM_not_in_group | 0.020384 |
| 0.013806 | AM_not_in_group | 0.020384 |
| 1        | AM_not_in_group | 0.020384 |

diffusion\_prioritization\_ALL

|          |                 |          |
|----------|-----------------|----------|
| 0.000013 | AM_not_in_group | 0.000002 |
| 0.000002 | AM_not_in_group | 0.000023 |
| 0.000002 | AM_not_in_group | 0.000019 |
| 0.010361 | AM_not_in_group | 0.000006 |
| 0.000011 | AM_not_in_group | 0        |
| 0.000012 | AM_not_in_group | 0        |
| 0.000011 | AM_not_in_group | 0        |
| 0.000001 | AM_not_in_group | 0.000014 |
| 0.000001 | AM_not_in_group | 0        |
| 0.000001 | AM_not_in_group | 0.000008 |
| 0.000001 | AM_not_in_group | 0.000008 |
| 0.000006 | AM_not_in_group | 0        |
| 0.000006 | AM_not_in_group | 0        |
| 0.000001 | AM_not_in_group | 0.000007 |
| 0        | AM_not_in_group | 0.000003 |
| 0        | AM_in_group     | 1        |
| 0        | AM_in_group     | 1        |
| 0        | AM_not_in_group | 0.454545 |
| 0        | AM_not_in_group | 0.454545 |
| 0        | AM_not_in_group | 0.000001 |
| 0        | AM_not_in_group | 0        |

diffusion\_prioritization\_ALL

|   |                 |   |
|---|-----------------|---|
| 0 | AM_not_in_group | 0 |
| 1 | AM_not_in_group | 0 |
| 0 | AM_not_in_group | 0 |
| 0 | AM_not_in_group | 0 |
| 0 | AM_not_in_group | 0 |

diffusion\_prioritization\_ALL

|          |                 |   |
|----------|-----------------|---|
| 0        | AM_not_in_group | 0 |
| 0        | AM_not_in_group | 0 |
| 0.059344 | AM_not_in_group | 0 |
| 0        | AM_not_in_group | 0 |
| 0.028552 | AM_not_in_group | 0 |
| 0        | AM_not_in_group | 0 |
| 0.126263 | AM_not_in_group | 0 |
| 0        | AM_not_in_group | 0 |



diffusion\_prioritization\_ALL

|          |                 |   |
|----------|-----------------|---|
| 0        | AM_not_in_group | 0 |
| 0.262432 | AM_not_in_group | 0 |
| 0        | AM_not_in_group | 0 |
| 0.0552   | AM_not_in_group | 0 |
| 0        | AM_not_in_group | 0 |
| 1        | AM_not_in_group | 0 |
| 0        | AM_not_in_group | 0 |

diffusion\_prioritization\_ALL

|          |                 |   |
|----------|-----------------|---|
| 0        | AM_not_in_group | 0 |
| 1        | AM_not_in_group | 0 |
| 0        | AM_not_in_group | 0 |
| 0.028552 | AM_not_in_group | 0 |
| 0        | AM_not_in_group | 0 |
| 0.0552   | AM_not_in_group | 0 |
| 0        | AM_not_in_group | 0 |

diffusion\_prioritization\_ALL

|          |                 |   |
|----------|-----------------|---|
| 0        | AM_not_in_group | 0 |
| 0.454545 | AM_not_in_group | 0 |
| 0        | AM_not_in_group | 0 |
| 0        | AM_not_in_group | 0 |
| 0        | AM_not_in_group | 0 |
| 0.0552   | AM_not_in_group | 0 |
| 0.454545 | AM_not_in_group | 0 |
| 0        | AM_not_in_group | 0 |
| 0        | AM_not_in_group | 0 |
| 0        | AM_not_in_group | 0 |
| 0.454545 | AM_not_in_group | 0 |
| 0        | AM_not_in_group | 0 |
| 1        | AM_not_in_group | 0 |
| 0        | AM_not_in_group | 0 |



diffusion\_prioritization\_ALL

|          |                 |   |
|----------|-----------------|---|
| 0        | AM_not_in_group | 0 |
| 0.454545 | AM_not_in_group | 0 |
| 1        | AM_not_in_group | 0 |
| 0        | AM_not_in_group | 0 |



diffusion\_prioritization\_ALL

|          |                 |   |
|----------|-----------------|---|
| 0        | AM_not_in_group | 0 |
| 0.0552   | AM_not_in_group | 0 |
| 0        | AM_not_in_group | 0 |
| 0.510806 | AM_not_in_group | 0 |
| 0        | AM_not_in_group | 0 |





diffusion\_prioritization\_ALL

|          |                 |   |
|----------|-----------------|---|
| 0        | AM_not_in_group | 0 |
| 1        | AM_not_in_group | 0 |
| 0        | AM_not_in_group | 0 |
| 0.126263 | AM_not_in_group | 0 |
| 0        | AM_not_in_group | 0 |
| 0.162255 | AM_not_in_group | 0 |
| 0        | AM_not_in_group | 0 |

diffusion\_prioritization\_ALL

|          |                 |          |
|----------|-----------------|----------|
| 0        | AM_not_in_group | 0        |
| 1        | AM_not_in_group | 0        |
| 0        | AM_not_in_group | 0        |
| 0.454545 | AM_not_in_group | 0        |
| 0        | AM_not_in_group | 0        |
| 0.085291 | AM_not_in_group | 0.097452 |
| 0.024991 | AM_not_in_group | 0.074107 |

diffusion\_prioritization\_ALL

|          |                 |          |
|----------|-----------------|----------|
| 0.024658 | AM_not_in_group | 0.064521 |
| 0.009733 | AM_not_in_group | 0.063398 |
| 0.014362 | AM_not_in_group | 0.040206 |
| 0.001536 | AM_not_in_group | 0.037782 |
| 0.001536 | AM_not_in_group | 0.037782 |
| 0.003343 | AM_not_in_group | 0.030972 |
| 0.158994 | AM_not_in_group | 0.028545 |
| 0.000764 | AM_not_in_group | 0.026221 |
| 0.012659 | AM_not_in_group | 0.022411 |
| 0.029557 | AM_not_in_group | 0.019861 |
| 0.076127 | AM_not_in_group | 0.018623 |
| 0.01551  | AM_not_in_group | 0.017722 |
| 0.01551  | AM_not_in_group | 0.017722 |
| 0.02105  | AM_not_in_group | 0.016326 |
| 0.012099 | AM_not_in_group | 0.013759 |
| 0.033962 | AM_not_in_group | 0.012722 |
| 0.009126 | AM_not_in_group | 0.012314 |
| 0.025654 | AM_not_in_group | 0.012117 |
| 0.034852 | AM_not_in_group | 0.012083 |
| 0.00702  | AM_not_in_group | 0.01185  |
| 0.007059 | AM_not_in_group | 0.010874 |
| 0.015616 | AM_not_in_group | 0.010136 |
| 0.015616 | AM_not_in_group | 0.010136 |
| 0.016909 | AM_not_in_group | 0.009581 |
| 0.009777 | AM_not_in_group | 0.009167 |
| 0.009777 | AM_not_in_group | 0.009167 |
| 0.001107 | AM_not_in_group | 0.009023 |
| 0.030553 | AM_not_in_group | 0.008414 |
| 0.030553 | AM_not_in_group | 0.008414 |
| 0.000493 | AM_not_in_group | 0.008321 |
| 0.001614 | AM_not_in_group | 0.007165 |
| 0.01025  | AM_not_in_group | 0.00704  |
| 0.011824 | AM_not_in_group | 0.006929 |
| 0.002958 | AM_not_in_group | 0.006769 |
| 0.002794 | AM_not_in_group | 0.00644  |
| 0.002366 | AM_not_in_group | 0.006319 |
| 0.011699 | AM_not_in_group | 0.006258 |
| 0.027189 | AM_not_in_group | 0.006227 |
| 0.006456 | AM_not_in_group | 0.005179 |
| 0.010425 | AM_not_in_group | 0.005102 |
| 0.015074 | AM_not_in_group | 0.004465 |
| 0.001072 | AM_not_in_group | 0.004439 |
| 0.01212  | AM_not_in_group | 0.004207 |
| 0.001113 | AM_not_in_group | 0.004071 |
| 0.00091  | AM_not_in_group | 0.003768 |
| 0.0001   | AM_not_in_group | 0.003288 |
| 0.003568 | AM_not_in_group | 0.003199 |
| 0.008674 | AM_not_in_group | 0.003041 |
| 0.001707 | AM_not_in_group | 0.002953 |
| 0.081852 | AM_not_in_group | 0.002815 |
| 0.012588 | AM_not_in_group | 0.002815 |

## diffusion\_prioritization\_ALL

|          |                 |          |
|----------|-----------------|----------|
| 0.09654  | AM_not_in_group | 0.002766 |
| 0.002095 | AM_not_in_group | 0.002761 |
| 0.000957 | AM_not_in_group | 0.002631 |
| 0.006037 | AM_not_in_group | 0.002553 |
| 0.006037 | AM_not_in_group | 0.002553 |
| 0.000933 | AM_not_in_group | 0.002517 |
| 0.000865 | AM_not_in_group | 0.002311 |
| 0.001789 | AM_not_in_group | 0.001812 |
| 0.001789 | AM_not_in_group | 0.001812 |
| 0.001789 | AM_not_in_group | 0.001812 |
| 0.001601 | AM_not_in_group | 0.001736 |
| 0.003137 | AM_not_in_group | 0.001732 |
| 0.002782 | AM_not_in_group | 0.001621 |
| 0.009402 | AM_not_in_group | 0.001576 |
| 0.007019 | AM_not_in_group | 0.001555 |
| 0.007019 | AM_not_in_group | 0.001555 |
| 0.007408 | AM_not_in_group | 0.001553 |
| 0.026416 | AM_not_in_group | 0.001488 |
| 0.021823 | AM_not_in_group | 0.001473 |
| 0.00195  | AM_not_in_group | 0.001472 |
| 0.00195  | AM_not_in_group | 0.001472 |
| 0.000667 | AM_not_in_group | 0.00139  |
| 0.001277 | AM_not_in_group | 0.001304 |
| 0.000534 | AM_not_in_group | 0.001231 |
| 0.000534 | AM_not_in_group | 0.001231 |
| 0.000534 | AM_not_in_group | 0.001231 |
| 0.001754 | AM_not_in_group | 0.001227 |
| 0.029224 | AM_not_in_group | 0.001202 |
| 0.001008 | AM_not_in_group | 0.001137 |
| 0.000489 | AM_not_in_group | 0.001118 |
| 0.002873 | AM_not_in_group | 0.001104 |
| 0.000542 | AM_not_in_group | 0.001048 |
| 0.000264 | AM_not_in_group | 0.001016 |
| 0.000264 | AM_not_in_group | 0.001016 |
| 0.024109 | AM_not_in_group | 0.000991 |
| 0.024109 | AM_not_in_group | 0.000991 |
| 0.000511 | AM_not_in_group | 0.000977 |
| 0.000511 | AM_not_in_group | 0.000977 |
| 0.000233 | AM_not_in_group | 0.000964 |
| 0.002732 | AM_not_in_group | 0.000958 |
| 0.000938 | AM_not_in_group | 0.000924 |
| 0.097673 | AM_not_in_group | 0.000885 |
| 0.003467 | AM_not_in_group | 0.000883 |
| 0.019449 | AM_not_in_group | 0.000872 |
| 0.001636 | AM_not_in_group | 0.000859 |

diffusion\_prioritization\_ALL

|          |                 |          |
|----------|-----------------|----------|
| 0.001529 | AM_not_in_group | 0.000827 |
| 0.001669 | AM_not_in_group | 0.000754 |
| 0.01041  | AM_not_in_group | 0.000751 |
| 0.000209 | AM_not_in_group | 0.000722 |
| 0.00176  | AM_not_in_group | 0.000712 |
| 0.000526 | AM_not_in_group | 0.000694 |
| 0.000526 | AM_not_in_group | 0.000694 |
| 0.00027  | AM_not_in_group | 0.00069  |
| 0.032331 | AM_not_in_group | 0.000671 |
| 0.022313 | AM_not_in_group | 0.000639 |
| 0.022313 | AM_not_in_group | 0.000639 |
| 0.002152 | AM_not_in_group | 0.000614 |
| 0.026446 | AM_not_in_group | 0.000599 |
| 0.010814 | AM_not_in_group | 0.000596 |
| 0.001697 | AM_not_in_group | 0.000594 |
| 0.001548 | AM_not_in_group | 0.000592 |
| 0.001548 | AM_not_in_group | 0.000592 |
| 0.001408 | AM_not_in_group | 0.00059  |
| 0.001152 | AM_not_in_group | 0.000585 |
| 0.001152 | AM_not_in_group | 0.000585 |
| 0.000454 | AM_not_in_group | 0.000569 |
| 0.000137 | AM_not_in_group | 0.000568 |
| 0.001705 | AM_not_in_group | 0.000535 |
| 0.024982 | AM_not_in_group | 0.000509 |
| 0.043127 | AM_not_in_group | 0.000498 |
| 0.001576 | AM_not_in_group | 0.000478 |
| 0.00093  | AM_not_in_group | 0.000475 |
| 0.002241 | AM_not_in_group | 0.000469 |
| 0.001471 | AM_not_in_group | 0.000458 |
| 0.00076  | AM_not_in_group | 0.000452 |
| 0.001218 | AM_not_in_group | 0.000442 |
| 0.002209 | AM_not_in_group | 0.00042  |
| 0.009357 | AM_not_in_group | 0.00042  |
| 0.000075 | AM_not_in_group | 0.000413 |
| 0.004576 | AM_not_in_group | 0.000412 |
| 0.000299 | AM_not_in_group | 0.000397 |
| 0.010807 | AM_not_in_group | 0.000396 |
| 0.007636 | AM_not_in_group | 0.000392 |
| 0.000267 | AM_not_in_group | 0.00039  |
| 0.000798 | AM_not_in_group | 0.000388 |
| 0.001416 | AM_not_in_group | 0.000379 |
| 0.000806 | AM_not_in_group | 0.000377 |
| 0.001252 | AM_not_in_group | 0.000372 |
| 0.002798 | AM_not_in_group | 0.000366 |
| 0.027975 | AM_not_in_group | 0.000347 |
| 0.032438 | AM_not_in_group | 0.000339 |
| 0.032438 | AM_not_in_group | 0.000339 |
| 0.00218  | AM_not_in_group | 0.000338 |

diffusion\_prioritization\_ALL

|          |                 |          |
|----------|-----------------|----------|
| 0.000861 | AM_not_in_group | 0.000334 |
| 0.001151 | AM_not_in_group | 0.000329 |
| 0.001953 | AM_not_in_group | 0.000326 |
| 0.017433 | AM_not_in_group | 0.000308 |
| 0.00046  | AM_not_in_group | 0.000302 |
| 0.000608 | AM_not_in_group | 0.000283 |
| 0.000482 | AM_not_in_group | 0.000271 |
| 0.00101  | AM_not_in_group | 0.000271 |
| 0.000875 | AM_not_in_group | 0.000268 |
| 0.003656 | AM_not_in_group | 0.000254 |
| 0.000456 | AM_not_in_group | 0.000247 |
| 0.000456 | AM_not_in_group | 0.000247 |
| 0.008685 | AM_not_in_group | 0.000243 |
| 0.008685 | AM_not_in_group | 0.000243 |
| 0.000727 | AM_not_in_group | 0.000234 |
| 0.000296 | AM_not_in_group | 0.000231 |
| 0.000296 | AM_not_in_group | 0.000231 |
| 0.003702 | AM_not_in_group | 0.000221 |
| 0.000719 | AM_not_in_group | 0.00022  |
| 0.000886 | AM_not_in_group | 0.000216 |
| 0.001115 | AM_not_in_group | 0.000214 |
| 0.023496 | AM_not_in_group | 0.000213 |
| 0.000146 | AM_not_in_group | 0.000212 |
| 0.000146 | AM_not_in_group | 0.000212 |
| 0.000654 | AM_not_in_group | 0.00021  |
| 0.001261 | AM_not_in_group | 0.000189 |
| 0.000422 | AM_not_in_group | 0.000181 |
| 0.001359 | AM_not_in_group | 0.000176 |
| 0.000699 | AM_not_in_group | 0.000164 |
| 0.000051 | AM_not_in_group | 0.000164 |
| 0.000467 | AM_not_in_group | 0.000154 |
| 0.001842 | AM_not_in_group | 0.000147 |
| 0.003718 | AM_not_in_group | 0.000143 |
| 0.001779 | AM_not_in_group | 0.000138 |
| 0.001779 | AM_not_in_group | 0.000138 |
| 0.001652 | AM_not_in_group | 0.000136 |
| 0.001652 | AM_not_in_group | 0.000136 |
| 0.00006  | AM_not_in_group | 0.000118 |
| 0.000281 | AM_not_in_group | 0.000118 |
| 0.000382 | AM_not_in_group | 0.000116 |
| 0.00041  | AM_not_in_group | 0.000114 |
| 0.000459 | AM_not_in_group | 0.000113 |
| 0.000269 | AM_not_in_group | 0.000113 |
| 0.001568 | AM_not_in_group | 0.000113 |

## diffusion\_prioritization\_ALL

|          |                 |          |
|----------|-----------------|----------|
| 0.001568 | AM_not_in_group | 0.000113 |
| 0.017023 | AM_not_in_group | 0.000112 |
| 0.000835 | AM_not_in_group | 0.000106 |
| 0.000682 | AM_not_in_group | 0.000106 |
| 0.001413 | AM_not_in_group | 0.000103 |
| 0.001413 | AM_not_in_group | 0.000103 |
| 0.03438  | AM_not_in_group | 0.000099 |
| 0.000715 | AM_not_in_group | 0.000095 |
| 0.004436 | AM_not_in_group | 0.000094 |
| 0.00418  | AM_not_in_group | 0.000093 |
| 0.013623 | AM_not_in_group | 0.000089 |
| 0.004814 | AM_not_in_group | 0.000085 |
| 0.203986 | AM_not_in_group | 0.000082 |
| 0.000041 | AM_not_in_group | 0.000082 |
| 0.004801 | AM_not_in_group | 0.000078 |
| 0.000004 | AM_not_in_group | 0.000077 |
| 0.000939 | AM_not_in_group | 0.000075 |
| 0.13646  | AM_not_in_group | 0.000073 |
| 0.0003   | AM_not_in_group | 0.000069 |
| 0.004323 | AM_not_in_group | 0.00006  |
| 0.002213 | AM_not_in_group | 0.000053 |
| 0.001373 | AM_not_in_group | 0.000049 |
| 0.000538 | AM_not_in_group | 0.000048 |
| 0.050533 | AM_not_in_group | 0.000047 |
| 0.000462 | AM_not_in_group | 0.000043 |
| 0.046579 | AM_not_in_group | 0.000043 |
| 0.006229 | AM_not_in_group | 0.000041 |
| 0.0002   | AM_not_in_group | 0.000041 |
| 0.00002  | AM_not_in_group | 0.000034 |
| 0.000016 | AM_not_in_group | 0.000034 |
| 0.000725 | AM_not_in_group | 0.000034 |
| 0.00002  | AM_not_in_group | 0.000034 |
| 0.000136 | AM_not_in_group | 0.000031 |
| 0.017872 | AM_not_in_group | 0.000026 |
| 0.002872 | AM_not_in_group | 0.000025 |
| 0.000116 | AM_not_in_group | 0.000022 |
| 0.002826 | AM_not_in_group | 0.00002  |
| 0.049071 | AM_not_in_group | 0.00002  |
| 0.011958 | AM_not_in_group | 0.000018 |
| 0.000008 | AM_not_in_group | 0.000016 |
| 0.000783 | AM_not_in_group | 0.000014 |
| 0.068919 | AM_not_in_group | 0.000014 |
| 0.000136 | AM_not_in_group | 0.000012 |
| 0.007447 | AM_not_in_group | 0.000011 |
| 0.00007  | AM_not_in_group | 0.000009 |

diffusion\_prioritization\_ALL

|          |                 |   |
|----------|-----------------|---|
| 0.000002 | AM_not_in_group | 0 |
| 0        | AM_not_in_group | 0 |



## diffusion\_prioritization\_ALL

| AM-K_label        | AM-K_score | -K_label        |
|-------------------|------------|-----------------|
| AM-K_not_in_group | 0.634459   | -K_not_in_group |
| AM-K_not_in_group | 0.578335   | -K_not_in_group |
| AM-K_not_in_group | 0.497066   | -K_not_in_group |
| AM-K_not_in_group | 0.454545   | -K_not_in_group |
| AM-K_not_in_group | 0.396948   | -K_not_in_group |
| AM-K_not_in_group | 0.389796   | -K_not_in_group |
| AM-K_not_in_group | 0.389508   | -K_not_in_group |
| AM-K_not_in_group | 0.369039   | -K_not_in_group |
| AM-K_not_in_group | 0.352642   | -K_not_in_group |
| AM-K_not_in_group | 0.328559   | -K_not_in_group |
| AM-K_not_in_group | 0.326467   | -K_not_in_group |
| AM-K_not_in_group | 0.321412   | -K_in_group     |
| AM-K_not_in_group | 0.321412   | -K_not_in_group |
| AM-K_not_in_group | 0.321412   | -K_not_in_group |
| AM-K_not_in_group | 0.304361   | -K_not_in_group |
| AM-K_not_in_group | 0.298936   | -K_in_group     |
| AM-K_not_in_group | 0.29324    | -K_not_in_group |
| AM-K_not_in_group | 0.291187   | -K_not_in_group |
| AM-K_not_in_group | 0.28769    | -K_not_in_group |
| AM-K_not_in_group | 0.283186   | -K_not_in_group |
| AM-K_not_in_group | 0.279036   | -K_in_group     |
| AM-K_not_in_group | 0.279036   | -K_not_in_group |
| AM-K_not_in_group | 0.273366   | -K_not_in_group |
| AM-K_not_in_group | 0.263597   | -K_not_in_group |
| AM-K_not_in_group | 0.262828   | -K_not_in_group |
| AM-K_not_in_group | 0.262432   | -K_not_in_group |
| AM-K_not_in_group | 0.250234   | -K_not_in_group |
| AM-K_not_in_group | 0.24881    | -K_not_in_group |
| AM-K_not_in_group | 0.24881    | -K_not_in_group |
| AM-K_not_in_group | 0.248438   | -K_not_in_group |
| AM-K_not_in_group | 0.248012   | -K_not_in_group |
| AM-K_not_in_group | 0.245742   | -K_not_in_group |
| AM-K_not_in_group | 0.244368   | -K_not_in_group |
| AM-K_not_in_group | 0.243157   | -K_not_in_group |
| AM-K_not_in_group | 0.240097   | -K_in_group     |
| AM-K_not_in_group | 0.232549   | -K_not_in_group |
| AM-K_not_in_group | 0.227744   | -K_not_in_group |
| AM-K_not_in_group | 0.227273   | -K_not_in_group |
| AM-K_not_in_group | 0.226283   | -K_not_in_group |
| AM-K_not_in_group | 0.22476    | -K_not_in_group |
| AM-K_not_in_group | 0.22476    | -K_not_in_group |
| AM-K_not_in_group | 0.222145   | -K_not_in_group |
| AM-K_not_in_group | 0.219231   | -K_not_in_group |
| AM-K_not_in_group | 0.219231   | -K_not_in_group |
| AM-K_not_in_group | 0.219231   | -K_not_in_group |
| AM-K_not_in_group | 0.217994   | -K_not_in_group |
| AM-K_not_in_group | 0.217994   | -K_in_group     |
| AM-K_not_in_group | 0.21672    | -K_not_in_group |

diffusion\_prioritization\_ALL

|                   |          |                 |
|-------------------|----------|-----------------|
| AM-K_not_in_group | 0.214508 | -K_not_in_group |
| AM-K_not_in_group | 0.211309 | -K_not_in_group |
| AM-K_not_in_group | 0.211309 | -K_not_in_group |
| AM-K_not_in_group | 0.211309 | -K_not_in_group |
| AM-K_not_in_group | 0.206734 | -K_not_in_group |
| AM-K_not_in_group | 0.206315 | -K_not_in_group |
| AM-K_not_in_group | 0.203285 | -K_not_in_group |
| AM-K_not_in_group | 0.201919 | -K_in_group     |
| AM-K_not_in_group | 0.200875 | -K_not_in_group |
| AM-K_not_in_group | 0.195982 | -K_not_in_group |
| AM-K_not_in_group | 0.195122 | -K_not_in_group |
| AM-K_not_in_group | 0.194505 | -K_not_in_group |
| AM-K_not_in_group | 0.19386  | -K_not_in_group |
| AM-K_not_in_group | 0.193657 | -K_not_in_group |
| AM-K_not_in_group | 0.191337 | -K_not_in_group |
| AM-K_not_in_group | 0.189394 | -K_not_in_group |
| AM-K_not_in_group | 0.189394 | -K_not_in_group |
| AM-K_not_in_group | 0.189394 | -K_not_in_group |
| AM-K_not_in_group | 0.189194 | -K_not_in_group |
| AM-K_not_in_group | 0.187238 | -K_not_in_group |
| AM-K_not_in_group | 0.185567 | -K_not_in_group |
| AM-K_not_in_group | 0.184311 | -K_in_group     |
| AM-K_not_in_group | 0.184304 | -K_not_in_group |
| AM-K_not_in_group | 0.181424 | -K_not_in_group |
| AM-K_not_in_group | 0.180539 | -K_not_in_group |
| AM-K_not_in_group | 0.177592 | -K_not_in_group |
| AM-K_not_in_group | 0.176773 | -K_not_in_group |
| AM-K_not_in_group | 0.176605 | -K_not_in_group |
| AM-K_not_in_group | 0.174684 | -K_not_in_group |
| AM-K_not_in_group | 0.174081 | -K_not_in_group |
| AM-K_not_in_group | 0.173475 | -K_not_in_group |
| AM-K_not_in_group | 0.171986 | -K_not_in_group |
| AM-K_not_in_group | 0.171649 | -K_not_in_group |
| AM-K_not_in_group | 0.170385 | -K_not_in_group |
| AM-K_not_in_group | 0.167574 | -K_not_in_group |
| AM-K_not_in_group | 0.167436 | -K_not_in_group |
| AM-K_not_in_group | 0.167195 | -K_not_in_group |
| AM-K_not_in_group | 0.167195 | -K_not_in_group |
| AM-K_not_in_group | 0.167024 | -K_not_in_group |
| AM-K_not_in_group | 0.166694 | -K_not_in_group |
| AM-K_not_in_group | 0.165891 | -K_not_in_group |
| AM-K_not_in_group | 0.165873 | -K_not_in_group |
| AM-K_not_in_group | 0.16565  | -K_not_in_group |
| AM-K_not_in_group | 0.165395 | -K_not_in_group |
| AM-K_not_in_group | 0.165395 | -K_not_in_group |

diffusion\_prioritization\_ALL

|                   |          |                 |
|-------------------|----------|-----------------|
| AM-K_not_in_group | 0.164505 | -K_not_in_group |
| AM-K_not_in_group | 0.164201 | -K_not_in_group |
| AM-K_not_in_group | 0.162646 | -K_not_in_group |
| AM-K_not_in_group | 0.161294 | -K_not_in_group |
| AM-K_not_in_group | 0.160775 | -K_not_in_group |
| AM-K_not_in_group | 0.160234 | -K_not_in_group |
| AM-K_not_in_group | 0.160179 | -K_not_in_group |
| AM-K_not_in_group | 0.160083 | -K_not_in_group |
| AM-K_not_in_group | 0.160083 | -K_not_in_group |
| AM-K_not_in_group | 0.159615 | -K_not_in_group |
| AM-K_not_in_group | 0.159592 | -K_not_in_group |
| AM-K_not_in_group | 0.1591   | -K_not_in_group |
| AM-K_not_in_group | 0.157294 | -K_not_in_group |
| AM-K_not_in_group | 0.157294 | -K_not_in_group |
| AM-K_not_in_group | 0.157294 | -K_not_in_group |
| AM-K_not_in_group | 0.156481 | -K_not_in_group |
| AM-K_not_in_group | 0.156245 | -K_not_in_group |
| AM-K_not_in_group | 0.155217 | -K_not_in_group |
| AM-K_not_in_group | 0.154702 | -K_not_in_group |
| AM-K_not_in_group | 0.153681 | -K_not_in_group |
| AM-K_not_in_group | 0.152677 | -K_not_in_group |
| AM-K_not_in_group | 0.150136 | -K_not_in_group |
| AM-K_not_in_group | 0.15007  | -K_not_in_group |
| AM-K_not_in_group | 0.148787 | -K_not_in_group |
| AM-K_not_in_group | 0.148224 | -K_not_in_group |
| AM-K_not_in_group | 0.148162 | -K_not_in_group |
| AM-K_not_in_group | 0.147882 | -K_not_in_group |
| AM-K_not_in_group | 0.145889 | -K_not_in_group |
| AM-K_not_in_group | 0.145362 | -K_not_in_group |
| AM-K_not_in_group | 0.144843 | -K_in_group     |
| AM-K_not_in_group | 0.144643 | -K_not_in_group |
| AM-K_not_in_group | 0.144572 | -K_not_in_group |
| AM-K_not_in_group | 0.143411 | -K_not_in_group |
| AM-K_not_in_group | 0.143359 | -K_not_in_group |
| AM-K_not_in_group | 0.142822 | -K_not_in_group |
| AM-K_not_in_group | 0.142669 | -K_not_in_group |
| AM-K_not_in_group | 0.141242 | -K_not_in_group |
| AM-K_not_in_group | 0.141006 | -K_not_in_group |

## diffusion\_prioritization\_ALL

|                   |          |                 |
|-------------------|----------|-----------------|
| AM-K_not_in_group | 0.141006 | -K_not_in_group |
| AM-K_not_in_group | 0.140516 | -K_not_in_group |
| AM-K_not_in_group | 0.139384 | -K_in_group     |
| AM-K_not_in_group | 0.137141 | -K_not_in_group |
| AM-K_not_in_group | 0.136853 | -K_in_group     |
| AM-K_not_in_group | 0.136814 | -K_not_in_group |
| AM-K_not_in_group | 0.136578 | -K_not_in_group |
| AM-K_not_in_group | 0.136416 | -K_not_in_group |
| AM-K_not_in_group | 0.136211 | -K_not_in_group |
| AM-K_not_in_group | 0.13578  | -K_not_in_group |
| AM-K_not_in_group | 0.135657 | -K_not_in_group |
| AM-K_not_in_group | 0.13564  | -K_not_in_group |
| AM-K_not_in_group | 0.135625 | -K_not_in_group |
| AM-K_not_in_group | 0.135453 | -K_not_in_group |
| AM-K_not_in_group | 0.134309 | -K_not_in_group |
| AM-K_not_in_group | 0.133533 | -K_not_in_group |
| AM-K_not_in_group | 0.13303  | -K_not_in_group |
| AM-K_not_in_group | 0.132779 | -K_not_in_group |
| AM-K_not_in_group | 0.131862 | -K_not_in_group |
| AM-K_not_in_group | 0.131436 | -K_not_in_group |
| AM-K_not_in_group | 0.13088  | -K_not_in_group |
| AM-K_not_in_group | 0.130711 | -K_not_in_group |
| AM-K_not_in_group | 0.130479 | -K_not_in_group |
| AM-K_not_in_group | 0.129507 | -K_not_in_group |
| AM-K_not_in_group | 0.129255 | -K_not_in_group |
| AM-K_not_in_group | 0.128472 | -K_not_in_group |
| AM-K_not_in_group | 0.127286 | -K_not_in_group |
| AM-K_not_in_group | 0.127238 | -K_not_in_group |
| AM-K_not_in_group | 0.126263 | -K_not_in_group |
| AM-K_not_in_group | 0.126263 | -K_not_in_group |
| AM-K_not_in_group | 0.125669 | -K_not_in_group |
| AM-K_not_in_group | 0.125522 | -K_not_in_group |
| AM-K_not_in_group | 0.125267 | -K_not_in_group |
| AM-K_not_in_group | 0.125156 | -K_not_in_group |
| AM-K_not_in_group | 0.124895 | -K_not_in_group |
| AM-K_not_in_group | 0.124895 | -K_not_in_group |
| AM-K_not_in_group | 0.124895 | -K_not_in_group |
| AM-K_not_in_group | 0.124891 | -K_not_in_group |
| AM-K_not_in_group | 0.124245 | -K_not_in_group |

## diffusion\_prioritization\_ALL

|                   |          |                 |
|-------------------|----------|-----------------|
| AM-K_not_in_group | 0.123179 | -K_not_in_group |
| AM-K_not_in_group | 0.123179 | -K_not_in_group |
| AM-K_not_in_group | 0.123154 | -K_in_group     |
| AM-K_not_in_group | 0.122508 | -K_not_in_group |
| AM-K_not_in_group | 0.122408 | -K_not_in_group |
| AM-K_not_in_group | 0.121136 | -K_not_in_group |
| AM-K_not_in_group | 0.120815 | -K_not_in_group |
| AM-K_not_in_group | 0.120762 | -K_not_in_group |
| AM-K_not_in_group | 0.120708 | -K_not_in_group |
| AM-K_not_in_group | 0.120127 | -K_not_in_group |
| AM-K_not_in_group | 0.119142 | -K_not_in_group |
| AM-K_not_in_group | 0.118602 | -K_not_in_group |
| AM-K_not_in_group | 0.11605  | -K_not_in_group |
| AM-K_not_in_group | 0.115986 | -K_not_in_group |
| AM-K_not_in_group | 0.115514 | -K_not_in_group |
| AM-K_not_in_group | 0.115052 | -K_not_in_group |
| AM-K_not_in_group | 0.114884 | -K_not_in_group |
| AM-K_not_in_group | 0.114884 | -K_not_in_group |
| AM-K_not_in_group | 0.114884 | -K_not_in_group |
| AM-K_not_in_group | 0.11444  | -K_not_in_group |
| AM-K_not_in_group | 0.11399  | -K_not_in_group |
| AM-K_not_in_group | 0.113868 | -K_not_in_group |
| AM-K_not_in_group | 0.112567 | -K_not_in_group |
| AM-K_not_in_group | 0.112217 | -K_not_in_group |
| AM-K_not_in_group | 0.112053 | -K_not_in_group |
| AM-K_not_in_group | 0.111902 | -K_not_in_group |
| AM-K_not_in_group | 0.11054  | -K_not_in_group |
| AM-K_not_in_group | 0.110233 | -K_not_in_group |
| AM-K_not_in_group | 0.109865 | -K_not_in_group |
| AM-K_not_in_group | 0.109865 | -K_in_group     |
| AM-K_not_in_group | 0.109865 | -K_not_in_group |
| AM-K_not_in_group | 0.108989 | -K_not_in_group |
| AM-K_not_in_group | 0.108745 | -K_not_in_group |
| AM-K_not_in_group | 0.108433 | -K_not_in_group |
| AM-K_not_in_group | 0.108398 | -K_not_in_group |
| AM-K_not_in_group | 0.108    | -K_not_in_group |
| AM-K_not_in_group | 0.107738 | -K_not_in_group |
| AM-K_not_in_group | 0.106971 | -K_in_group     |

diffusion\_prioritization\_ALL

|                   |          |                 |
|-------------------|----------|-----------------|
| AM-K_not_in_group | 0.106739 | -K_not_in_group |
| AM-K_not_in_group | 0.1065   | -K_not_in_group |
| AM-K_not_in_group | 0.106355 | -K_not_in_group |
| AM-K_not_in_group | 0.106332 | -K_not_in_group |
| AM-K_not_in_group | 0.106147 | -K_not_in_group |
| AM-K_not_in_group | 0.10602  | -K_not_in_group |
| AM-K_not_in_group | 0.105953 | -K_not_in_group |
| AM-K_not_in_group | 0.105462 | -K_not_in_group |
| AM-K_not_in_group | 0.105218 | -K_not_in_group |
| AM-K_not_in_group | 0.105151 | -K_not_in_group |
| AM-K_not_in_group | 0.104799 | -K_not_in_group |
| AM-K_not_in_group | 0.104473 | -K_not_in_group |
| AM-K_not_in_group | 0.104252 | -K_not_in_group |
| AM-K_not_in_group | 0.104182 | -K_not_in_group |
| AM-K_not_in_group | 0.10416  | -K_not_in_group |
| AM-K_not_in_group | 0.10408  | -K_not_in_group |
| AM-K_not_in_group | 0.104038 | -K_not_in_group |
| AM-K_not_in_group | 0.103553 | -K_not_in_group |
| AM-K_not_in_group | 0.102962 | -K_not_in_group |
| AM-K_not_in_group | 0.102962 | -K_not_in_group |
| AM-K_not_in_group | 0.102644 | -K_not_in_group |
| AM-K_not_in_group | 0.102644 | -K_in_group     |
| AM-K_not_in_group | 0.102644 | -K_not_in_group |
| AM-K_not_in_group | 0.102644 | -K_not_in_group |
| AM-K_not_in_group | 0.102644 | -K_not_in_group |
| AM-K_not_in_group | 0.102504 | -K_not_in_group |
| AM-K_not_in_group | 0.10232  | -K_not_in_group |
| AM-K_not_in_group | 0.102302 | -K_not_in_group |
| AM-K_not_in_group | 0.102113 | -K_not_in_group |
| AM-K_not_in_group | 0.102047 | -K_not_in_group |
| AM-K_not_in_group | 0.101618 | -K_not_in_group |
| AM-K_not_in_group | 0.101389 | -K_not_in_group |
| AM-K_not_in_group | 0.101354 | -K_not_in_group |
| AM-K_not_in_group | 0.101165 | -K_not_in_group |
| AM-K_not_in_group | 0.100939 | -K_not_in_group |
| AM-K_not_in_group | 0.100776 | -K_not_in_group |
| AM-K_not_in_group | 0.100409 | -K_not_in_group |
| AM-K_not_in_group | 0.1004   | -K_not_in_group |
| AM-K_not_in_group | 0.100377 | -K_not_in_group |
| AM-K_not_in_group | 0.100041 | -K_not_in_group |
| AM-K_not_in_group | 0.100041 | -K_not_in_group |
| AM-K_not_in_group | 0.099605 | -K_not_in_group |
| AM-K_not_in_group | 0.099064 | -K_not_in_group |
| AM-K_not_in_group | 0.099064 | -K_not_in_group |
| AM-K_not_in_group | 0.098762 | -K_not_in_group |
| AM-K_not_in_group | 0.098662 | -K_not_in_group |

diffusion\_prioritization\_ALL

|                   |          |                 |
|-------------------|----------|-----------------|
| AM-K_not_in_group | 0.098461 | -K_not_in_group |
| AM-K_not_in_group | 0.098183 | -K_not_in_group |
| AM-K_not_in_group | 0.098101 | -K_not_in_group |
| AM-K_not_in_group | 0.09725  | -K_not_in_group |
| AM-K_not_in_group | 0.097194 | -K_not_in_group |
| AM-K_not_in_group | 0.09671  | -K_not_in_group |
| AM-K_not_in_group | 0.096342 | -K_not_in_group |
| AM-K_not_in_group | 0.096103 | -K_not_in_group |
| AM-K_not_in_group | 0.095819 | -K_not_in_group |
| AM-K_not_in_group | 0.09537  | -K_not_in_group |
| AM-K_not_in_group | 0.09515  | -K_not_in_group |
| AM-K_not_in_group | 0.09508  | -K_not_in_group |
| AM-K_not_in_group | 0.094711 | -K_not_in_group |
| AM-K_not_in_group | 0.094705 | -K_not_in_group |
| AM-K_not_in_group | 0.094697 | -K_not_in_group |
| AM-K_not_in_group | 0.094697 | -K_not_in_group |
| AM-K_not_in_group | 0.094697 | -K_not_in_group |
| AM-K_not_in_group | 0.09444  | -K_in_group     |
| AM-K_not_in_group | 0.094419 | -K_not_in_group |
| AM-K_not_in_group | 0.093951 | -K_not_in_group |
| AM-K_not_in_group | 0.093094 | -K_in_group     |
| AM-K_not_in_group | 0.092878 | -K_not_in_group |
| AM-K_not_in_group | 0.092567 | -K_not_in_group |
| AM-K_not_in_group | 0.092486 | -K_not_in_group |
| AM-K_not_in_group | 0.092194 | -K_not_in_group |
| AM-K_not_in_group | 0.092057 | -K_not_in_group |
| AM-K_not_in_group | 0.091257 | -K_not_in_group |
| AM-K_not_in_group | 0.090576 | -K_not_in_group |
| AM-K_not_in_group | 0.090414 | -K_not_in_group |
| AM-K_not_in_group | 0.09039  | -K_not_in_group |
| AM-K_not_in_group | 0.090085 | -K_not_in_group |
| AM-K_not_in_group | 0.090085 | -K_not_in_group |
| AM-K_not_in_group | 0.089989 | -K_not_in_group |
| AM-K_not_in_group | 0.08981  | -K_not_in_group |





diffusion\_prioritization\_ALL

|                   |          |                 |
|-------------------|----------|-----------------|
| AM-K_not_in_group | 0.080255 | -K_not_in_group |
| AM-K_not_in_group | 0.079988 | -K_not_in_group |
| AM-K_not_in_group | 0.079913 | -K_not_in_group |
| AM-K_not_in_group | 0.079598 | -K_not_in_group |
| AM-K_not_in_group | 0.079564 | -K_not_in_group |
| AM-K_not_in_group | 0.079561 | -K_not_in_group |
| AM-K_not_in_group | 0.079529 | -K_not_in_group |
| AM-K_not_in_group | 0.079098 | -K_not_in_group |
| AM-K_not_in_group | 0.079001 | -K_not_in_group |
| AM-K_not_in_group | 0.078604 | -K_not_in_group |
| AM-K_not_in_group | 0.078604 | -K_not_in_group |
| AM-K_not_in_group | 0.078604 | -K_not_in_group |
| AM-K_not_in_group | 0.078289 | -K_not_in_group |
| AM-K_not_in_group | 0.07741  | -K_not_in_group |
| AM-K_not_in_group | 0.077402 | -K_not_in_group |
| AM-K_not_in_group | 0.077402 | -K_not_in_group |
| AM-K_not_in_group | 0.077402 | -K_not_in_group |
| AM-K_not_in_group | 0.077088 | -K_not_in_group |
| AM-K_not_in_group | 0.077027 | -K_not_in_group |
| AM-K_not_in_group | 0.076795 | -K_not_in_group |
| AM-K_not_in_group | 0.076654 | -K_not_in_group |
| AM-K_not_in_group | 0.076155 | -K_not_in_group |
| AM-K_not_in_group | 0.076148 | -K_not_in_group |
| AM-K_not_in_group | 0.075703 | -K_not_in_group |
| AM-K_not_in_group | 0.075455 | -K_not_in_group |
| AM-K_not_in_group | 0.075455 | -K_in_group     |
| AM-K_not_in_group | 0.075455 | -K_not_in_group |
| AM-K_not_in_group | 0.075455 | -K_in_group     |
| AM-K_not_in_group | 0.075455 | -K_not_in_group |
| AM-K_not_in_group | 0.075455 | -K_in_group     |
| AM-K_not_in_group | 0.075455 | -K_not_in_group |
| AM-K_not_in_group | 0.075455 | -K_in_group     |
| AM-K_not_in_group | 0.075455 | -K_not_in_group |
| AM-K_not_in_group | 0.075455 | -K_in_group     |
| AM-K_not_in_group | 0.074513 | -K_not_in_group |
| AM-K_not_in_group | 0.074192 | -K_not_in_group |
| AM-K_not_in_group | 0.074129 | -K_not_in_group |
| AM-K_not_in_group | 0.073965 | -K_not_in_group |
| AM-K_not_in_group | 0.073655 | -K_not_in_group |
| AM-K_not_in_group | 0.073559 | -K_not_in_group |

diffusion\_prioritization\_ALL

|                   |          |                 |
|-------------------|----------|-----------------|
| AM-K_not_in_group | 0.072899 | -K_not_in_group |
| AM-K_not_in_group | 0.072609 | -K_not_in_group |
| AM-K_not_in_group | 0.072565 | -K_not_in_group |
| AM-K_not_in_group | 0.072375 | -K_not_in_group |
| AM-K_not_in_group | 0.072119 | -K_not_in_group |
| AM-K_not_in_group | 0.071286 | -K_not_in_group |
| AM-K_not_in_group | 0.071162 | -K_not_in_group |
| AM-K_not_in_group | 0.07096  | -K_not_in_group |
| AM-K_not_in_group | 0.070278 | -K_not_in_group |
| AM-K_not_in_group | 0.069903 | -K_not_in_group |
| AM-K_not_in_group | 0.06954  | -K_not_in_group |
| AM-K_not_in_group | 0.069159 | -K_not_in_group |
| AM-K_not_in_group | 0.069159 | -K_not_in_group |
| AM-K_not_in_group | 0.069159 | -K_not_in_group |
| AM-K_not_in_group | 0.069063 | -K_not_in_group |
| AM-K_not_in_group | 0.068723 | -K_not_in_group |
| AM-K_not_in_group | 0.068533 | -K_not_in_group |
| AM-K_not_in_group | 0.068247 | -K_not_in_group |
| AM-K_not_in_group | 0.068017 | -K_not_in_group |
| AM-K_not_in_group | 0.068008 | -K_not_in_group |
| AM-K_not_in_group | 0.067613 | -K_not_in_group |
| AM-K_not_in_group | 0.067613 | -K_not_in_group |
| AM-K_not_in_group | 0.067613 | -K_not_in_group |
| AM-K_not_in_group | 0.067582 | -K_not_in_group |
| AM-K_not_in_group | 0.067477 | -K_not_in_group |
| AM-K_not_in_group | 0.066952 | -K_not_in_group |
| AM-K_not_in_group | 0.066406 | -K_in_group     |
| AM-K_not_in_group | 0.066406 | -K_not_in_group |
| AM-K_not_in_group | 0.066335 | -K_not_in_group |
| AM-K_not_in_group | 0.066267 | -K_not_in_group |
| AM-K_not_in_group | 0.065921 | -K_not_in_group |
| AM-K_not_in_group | 0.065882 | -K_not_in_group |
| AM-K_not_in_group | 0.065879 | -K_not_in_group |
| AM-K_not_in_group | 0.065789 | -K_not_in_group |
| AM-K_not_in_group | 0.0656   | -K_not_in_group |
| AM-K_not_in_group | 0.065344 | -K_not_in_group |
| AM-K_not_in_group | 0.06488  | -K_not_in_group |
| AM-K_not_in_group | 0.06485  | -K_not_in_group |
| AM-K_not_in_group | 0.06465  | -K_not_in_group |
| AM-K_not_in_group | 0.06465  | -K_not_in_group |
| AM-K_not_in_group | 0.064496 | -K_not_in_group |
| AM-K_not_in_group | 0.064413 | -K_not_in_group |
| AM-K_not_in_group | 0.064323 | -K_not_in_group |
| AM-K_not_in_group | 0.064227 | -K_not_in_group |

diffusion\_prioritization\_ALL

|                   |          |                 |
|-------------------|----------|-----------------|
| AM-K_not_in_group | 0.064074 | -K_not_in_group |
| AM-K_not_in_group | 0.064074 | -K_not_in_group |
| AM-K_not_in_group | 0.064012 | -K_not_in_group |
| AM-K_not_in_group | 0.064012 | -K_not_in_group |
| AM-K_not_in_group | 0.064004 | -K_not_in_group |
| AM-K_not_in_group | 0.063971 | -K_not_in_group |
| AM-K_not_in_group | 0.063847 | -K_not_in_group |
| AM-K_not_in_group | 0.063408 | -K_not_in_group |
| AM-K_not_in_group | 0.063131 | -K_not_in_group |
| AM-K_not_in_group | 0.063046 | -K_not_in_group |
| AM-K_not_in_group | 0.06267  | -K_not_in_group |
| AM-K_not_in_group | 0.062215 | -K_not_in_group |
| AM-K_not_in_group | 0.061734 | -K_not_in_group |
| AM-K_not_in_group | 0.061707 | -K_not_in_group |
| AM-K_not_in_group | 0.061366 | -K_not_in_group |
| AM-K_not_in_group | 0.060811 | -K_not_in_group |
| AM-K_not_in_group | 0.06053  | -K_not_in_group |
| AM-K_not_in_group | 0.060007 | -K_not_in_group |
| AM-K_not_in_group | 0.059897 | -K_not_in_group |
| AM-K_not_in_group | 0.05985  | -K_not_in_group |
| AM-K_not_in_group | 0.059813 | -K_not_in_group |
| AM-K_not_in_group | 0.059722 | -K_not_in_group |
| AM-K_not_in_group | 0.059345 | -K_not_in_group |
| AM-K_not_in_group | 0.05917  | -K_not_in_group |
| AM-K_not_in_group | 0.058894 | -K_not_in_group |
| AM-K_not_in_group | 0.058497 | -K_not_in_group |
| AM-K_not_in_group | 0.058468 | -K_not_in_group |
| AM-K_not_in_group | 0.058144 | -K_in_group     |
| AM-K_not_in_group | 0.057888 | -K_not_in_group |
| AM-K_not_in_group | 0.057867 | -K_not_in_group |
| AM-K_not_in_group | 0.057829 | -K_not_in_group |
| AM-K_not_in_group | 0.05782  | -K_not_in_group |
| AM-K_not_in_group | 0.057686 | -K_not_in_group |
| AM-K_not_in_group | 0.057586 | -K_not_in_group |
| AM-K_not_in_group | 0.057396 | -K_not_in_group |
| AM-K_not_in_group | 0.057273 | -K_not_in_group |
| AM-K_not_in_group | 0.057273 | -K_not_in_group |
| AM-K_not_in_group | 0.057273 | -K_not_in_group |
| AM-K_not_in_group | 0.057255 | -K_not_in_group |
| AM-K_not_in_group | 0.057221 | -K_not_in_group |
| AM-K_not_in_group | 0.057199 | -K_not_in_group |

diffusion\_prioritization\_ALL

|                   |          |                 |
|-------------------|----------|-----------------|
| AM-K_not_in_group | 0.057092 | -K_not_in_group |
| AM-K_not_in_group | 0.057067 | -K_not_in_group |
| AM-K_not_in_group | 0.057031 | -K_not_in_group |
| AM-K_not_in_group | 0.057013 | -K_not_in_group |
| AM-K_not_in_group | 0.057006 | -K_not_in_group |
| AM-K_not_in_group | 0.056846 | -K_not_in_group |
| AM-K_not_in_group | 0.056662 | -K_not_in_group |
| AM-K_not_in_group | 0.056622 | -K_not_in_group |
| AM-K_not_in_group | 0.056548 | -K_not_in_group |
| AM-K_not_in_group | 0.056524 | -K_not_in_group |
| AM-K_not_in_group | 0.0562   | -K_in_group     |
| AM-K_not_in_group | 0.056117 | -K_not_in_group |
| AM-K_not_in_group | 0.055953 | -K_not_in_group |
| AM-K_not_in_group | 0.055953 | -K_not_in_group |
| AM-K_not_in_group | 0.055953 | -K_not_in_group |
| AM-K_not_in_group | 0.055877 | -K_not_in_group |
| AM-K_not_in_group | 0.055674 | -K_not_in_group |
| AM-K_not_in_group | 0.055237 | -K_not_in_group |
| AM-K_not_in_group | 0.054936 | -K_not_in_group |
| AM-K_not_in_group | 0.054857 | -K_not_in_group |
| AM-K_not_in_group | 0.05463  | -K_not_in_group |
| AM-K_not_in_group | 0.05457  | -K_not_in_group |
| AM-K_not_in_group | 0.054369 | -K_not_in_group |
| AM-K_not_in_group | 0.054369 | -K_not_in_group |
| AM-K_not_in_group | 0.054064 | -K_not_in_group |
| AM-K_not_in_group | 0.054029 | -K_not_in_group |
| AM-K_not_in_group | 0.054013 | -K_not_in_group |
| AM-K_not_in_group | 0.054006 | -K_not_in_group |
| AM-K_not_in_group | 0.053553 | -K_not_in_group |
| AM-K_not_in_group | 0.053456 | -K_not_in_group |



diffusion\_prioritization\_ALL

|                   |          |                 |
|-------------------|----------|-----------------|
| AM-K_not_in_group | 0.050772 | -K_not_in_group |
| AM-K_not_in_group | 0.050606 | -K_not_in_group |
| AM-K_not_in_group | 0.050492 | -K_not_in_group |
| AM-K_not_in_group | 0.05048  | -K_not_in_group |
| AM-K_not_in_group | 0.05048  | -K_not_in_group |
| AM-K_not_in_group | 0.050427 | -K_not_in_group |
| AM-K_not_in_group | 0.050427 | -K_not_in_group |
| AM-K_not_in_group | 0.050427 | -K_in_group     |
| AM-K_not_in_group | 0.050343 | -K_not_in_group |
| AM-K_not_in_group | 0.050265 | -K_not_in_group |
| AM-K_not_in_group | 0.050263 | -K_not_in_group |
| AM-K_not_in_group | 0.050107 | -K_not_in_group |
| AM-K_not_in_group | 0.049585 | -K_not_in_group |
| AM-K_not_in_group | 0.049525 | -K_not_in_group |
| AM-K_not_in_group | 0.049518 | -K_not_in_group |
| AM-K_not_in_group | 0.049113 | -K_not_in_group |
| AM-K_not_in_group | 0.049088 | -K_not_in_group |
| AM-K_not_in_group | 0.048876 | -K_not_in_group |
| AM-K_not_in_group | 0.048772 | -K_not_in_group |
| AM-K_not_in_group | 0.048709 | -K_not_in_group |
| AM-K_not_in_group | 0.048627 | -K_not_in_group |
| AM-K_not_in_group | 0.048627 | -K_not_in_group |
| AM-K_not_in_group | 0.048589 | -K_not_in_group |
| AM-K_not_in_group | 0.048535 | -K_not_in_group |
| AM-K_not_in_group | 0.048371 | -K_in_group     |
| AM-K_not_in_group | 0.048371 | -K_not_in_group |
| AM-K_not_in_group | 0.048329 | -K_not_in_group |
| AM-K_not_in_group | 0.048329 | -K_not_in_group |
| AM-K_not_in_group | 0.048216 | -K_not_in_group |
| AM-K_not_in_group | 0.048207 | -K_not_in_group |
| AM-K_not_in_group | 0.04819  | -K_not_in_group |
| AM-K_not_in_group | 0.048122 | -K_not_in_group |
| AM-K_not_in_group | 0.048122 | -K_in_group     |
| AM-K_not_in_group | 0.048122 | -K_not_in_group |



diffusion\_prioritization\_ALL

|                   |          |                 |
|-------------------|----------|-----------------|
| AM-K_not_in_group | 0.046404 | -K_not_in_group |
| AM-K_not_in_group | 0.046163 | -K_not_in_group |
| AM-K_not_in_group | 0.046152 | -K_not_in_group |
| AM-K_not_in_group | 0.046134 | -K_not_in_group |
| AM-K_not_in_group | 0.046049 | -K_not_in_group |
| AM-K_not_in_group | 0.045661 | -K_not_in_group |
| AM-K_not_in_group | 0.045621 | -K_not_in_group |
| AM-K_not_in_group | 0.045621 | -K_not_in_group |
| AM-K_not_in_group | 0.045621 | -K_not_in_group |
| AM-K_not_in_group | 0.045602 | -K_not_in_group |
| AM-K_not_in_group | 0.045568 | -K_not_in_group |
| AM-K_not_in_group | 0.045567 | -K_not_in_group |
| AM-K_not_in_group | 0.045543 | -K_not_in_group |
| AM-K_not_in_group | 0.045516 | -K_not_in_group |
| AM-K_not_in_group | 0.045272 | -K_not_in_group |
| AM-K_not_in_group | 0.044985 | -K_not_in_group |
| AM-K_not_in_group | 0.044769 | -K_not_in_group |
| AM-K_not_in_group | 0.044762 | -K_not_in_group |
| AM-K_not_in_group | 0.044723 | -K_not_in_group |
| AM-K_not_in_group | 0.044723 | -K_not_in_group |
| AM-K_not_in_group | 0.044723 | -K_not_in_group |
| AM-K_not_in_group | 0.044626 | -K_not_in_group |
| AM-K_not_in_group | 0.044499 | -K_not_in_group |
| AM-K_not_in_group | 0.044497 | -K_not_in_group |
| AM-K_not_in_group | 0.044489 | -K_not_in_group |
| AM-K_not_in_group | 0.044487 | -K_not_in_group |
| AM-K_not_in_group | 0.044487 | -K_not_in_group |
| AM-K_not_in_group | 0.044392 | -K_not_in_group |
| AM-K_not_in_group | 0.04421  | -K_not_in_group |
| AM-K_not_in_group | 0.04421  | -K_not_in_group |
| AM-K_not_in_group | 0.044203 | -K_not_in_group |
| AM-K_not_in_group | 0.044129 | -K_not_in_group |
| AM-K_not_in_group | 0.044129 | -K_in_group     |
| AM-K_not_in_group | 0.044129 | -K_in_group     |
| AM-K_not_in_group | 0.04378  | -K_not_in_group |



diffusion\_prioritization\_ALL

|                   |          |                 |
|-------------------|----------|-----------------|
| AM-K_not_in_group | 0.043663 | -K_not_in_group |
| AM-K_not_in_group | 0.043262 | -K_not_in_group |
| AM-K_not_in_group | 0.043194 | -K_not_in_group |
| AM-K_not_in_group | 0.043145 | -K_not_in_group |
| AM-K_not_in_group | 0.043044 | -K_not_in_group |
| AM-K_not_in_group | 0.043021 | -K_not_in_group |
| AM-K_not_in_group | 0.042992 | -K_not_in_group |
| AM-K_not_in_group | 0.042992 | -K_not_in_group |
| AM-K_not_in_group | 0.042967 | -K_not_in_group |
| AM-K_not_in_group | 0.042967 | -K_not_in_group |
| AM-K_not_in_group | 0.042967 | -K_not_in_group |
| AM-K_not_in_group | 0.042931 | -K_not_in_group |
| AM-K_not_in_group | 0.042855 | -K_not_in_group |
| AM-K_not_in_group | 0.042819 | -K_not_in_group |
| AM-K_not_in_group | 0.042816 | -K_not_in_group |
| AM-K_not_in_group | 0.042802 | -K_not_in_group |
| AM-K_not_in_group | 0.042611 | -K_not_in_group |
| AM-K_not_in_group | 0.042489 | -K_not_in_group |
| AM-K_not_in_group | 0.042489 | -K_not_in_group |
| AM-K_not_in_group | 0.042488 | -K_not_in_group |
| AM-K_not_in_group | 0.042389 | -K_not_in_group |
| AM-K_not_in_group | 0.042303 | -K_not_in_group |
| AM-K_not_in_group | 0.042303 | -K_not_in_group |
| AM-K_not_in_group | 0.042302 | -K_not_in_group |
| AM-K_not_in_group | 0.042231 | -K_not_in_group |
| AM-K_not_in_group | 0.042    | -K_not_in_group |
| AM-K_not_in_group | 0.041991 | -K_not_in_group |
| AM-K_not_in_group | 0.041951 | -K_not_in_group |
| AM-K_not_in_group | 0.041853 | -K_not_in_group |
| AM-K_not_in_group | 0.041841 | -K_not_in_group |
| AM-K_not_in_group | 0.041841 | -K_not_in_group |
| AM-K_not_in_group | 0.041714 | -K_not_in_group |
| AM-K_not_in_group | 0.041714 | -K_not_in_group |
| AM-K_not_in_group | 0.041714 | -K_not_in_group |
| AM-K_not_in_group | 0.041648 | -K_not_in_group |
| AM-K_not_in_group | 0.041621 | -K_not_in_group |
| AM-K_not_in_group | 0.041621 | -K_not_in_group |
| AM-K_not_in_group | 0.041621 | -K_not_in_group |
| AM-K_not_in_group | 0.041609 | -K_not_in_group |
| AM-K_not_in_group | 0.041454 | -K_not_in_group |
| AM-K_not_in_group | 0.041415 | -K_in_group     |

## diffusion\_prioritization\_ALL

|                   |          |                 |
|-------------------|----------|-----------------|
| AM-K_not_in_group | 0.041415 | -K_in_group     |
| AM-K_not_in_group | 0.041378 | -K_not_in_group |
| AM-K_not_in_group | 0.041277 | -K_not_in_group |
| AM-K_not_in_group | 0.041186 | -K_not_in_group |
| AM-K_not_in_group | 0.04115  | -K_not_in_group |
| AM-K_not_in_group | 0.041142 | -K_not_in_group |
| AM-K_not_in_group | 0.041088 | -K_not_in_group |
| AM-K_not_in_group | 0.041078 | -K_not_in_group |
| AM-K_not_in_group | 0.041008 | -K_not_in_group |
| AM-K_not_in_group | 0.04093  | -K_not_in_group |
| AM-K_not_in_group | 0.040831 | -K_not_in_group |
| AM-K_not_in_group | 0.040731 | -K_not_in_group |
| AM-K_not_in_group | 0.040706 | -K_not_in_group |
| AM-K_not_in_group | 0.040627 | -K_not_in_group |
| AM-K_not_in_group | 0.040484 | -K_not_in_group |
| AM-K_not_in_group | 0.040417 | -K_not_in_group |
| AM-K_not_in_group | 0.040346 | -K_in_group     |
| AM-K_not_in_group | 0.040335 | -K_not_in_group |
| AM-K_not_in_group | 0.040241 | -K_not_in_group |
| AM-K_not_in_group | 0.040228 | -K_not_in_group |
| AM-K_not_in_group | 0.040207 | -K_not_in_group |
| AM-K_not_in_group | 0.040203 | -K_in_group     |
| AM-K_not_in_group | 0.040203 | -K_not_in_group |
| AM-K_not_in_group | 0.040187 | -K_not_in_group |
| AM-K_not_in_group | 0.040161 | -K_not_in_group |
| AM-K_not_in_group | 0.040119 | -K_not_in_group |
| AM-K_not_in_group | 0.039927 | -K_not_in_group |
| AM-K_not_in_group | 0.039653 | -K_not_in_group |
| AM-K_not_in_group | 0.039537 | -K_not_in_group |
| AM-K_not_in_group | 0.039503 | -K_not_in_group |
| AM-K_not_in_group | 0.039216 | -K_not_in_group |
| AM-K_not_in_group | 0.039206 | -K_not_in_group |
| AM-K_not_in_group | 0.039197 | -K_not_in_group |
| AM-K_not_in_group | 0.039153 | -K_not_in_group |
| AM-K_not_in_group | 0.038986 | -K_not_in_group |
| AM-K_not_in_group | 0.038961 | -K_not_in_group |
| AM-K_not_in_group | 0.038718 | -K_not_in_group |
| AM-K_not_in_group | 0.038414 | -K_not_in_group |
| AM-K_not_in_group | 0.038237 | -K_not_in_group |
| AM-K_not_in_group | 0.038237 | -K_not_in_group |

diffusion\_prioritization\_ALL

|                   |          |                 |
|-------------------|----------|-----------------|
| AM-K_not_in_group | 0.038237 | -K_not_in_group |
| AM-K_not_in_group | 0.038205 | -K_not_in_group |
| AM-K_not_in_group | 0.038144 | -K_not_in_group |
| AM-K_not_in_group | 0.038078 | -K_not_in_group |
| AM-K_not_in_group | 0.038077 | -K_not_in_group |
| AM-K_not_in_group | 0.037968 | -K_not_in_group |
| AM-K_not_in_group | 0.037919 | -K_not_in_group |
| AM-K_not_in_group | 0.037895 | -K_not_in_group |
| AM-K_not_in_group | 0.03781  | -K_not_in_group |
| AM-K_not_in_group | 0.037746 | -K_not_in_group |
| AM-K_not_in_group | 0.037706 | -K_not_in_group |
| AM-K_not_in_group | 0.037622 | -K_in_group     |
| AM-K_not_in_group | 0.037595 | -K_not_in_group |
| AM-K_not_in_group | 0.037595 | -K_not_in_group |
| AM-K_not_in_group | 0.037586 | -K_not_in_group |
| AM-K_not_in_group | 0.037489 | -K_not_in_group |
| AM-K_not_in_group | 0.037311 | -K_not_in_group |
| AM-K_not_in_group | 0.037274 | -K_not_in_group |
| AM-K_not_in_group | 0.037146 | -K_not_in_group |
| AM-K_not_in_group | 0.037125 | -K_not_in_group |
| AM-K_not_in_group | 0.037048 | -K_not_in_group |
| AM-K_not_in_group | 0.03703  | -K_not_in_group |
| AM-K_not_in_group | 0.036878 | -K_not_in_group |
| AM-K_not_in_group | 0.036768 | -K_not_in_group |
| AM-K_not_in_group | 0.036747 | -K_not_in_group |
| AM-K_not_in_group | 0.036722 | -K_not_in_group |
| AM-K_not_in_group | 0.036625 | -K_not_in_group |
| AM-K_not_in_group | 0.036606 | -K_not_in_group |
| AM-K_not_in_group | 0.036597 | -K_not_in_group |
| AM-K_not_in_group | 0.036556 | -K_not_in_group |
| AM-K_not_in_group | 0.036501 | -K_not_in_group |

## diffusion\_prioritization\_ALL

|                   |          |                 |
|-------------------|----------|-----------------|
| AM-K_not_in_group | 0.036469 | -K_not_in_group |
| AM-K_not_in_group | 0.036172 | -K_not_in_group |
| AM-K_not_in_group | 0.036084 | -K_not_in_group |
| AM-K_not_in_group | 0.036067 | -K_not_in_group |
| AM-K_not_in_group | 0.036029 | -K_not_in_group |
| AM-K_not_in_group | 0.036006 | -K_not_in_group |
| AM-K_not_in_group | 0.036004 | -K_not_in_group |
| AM-K_not_in_group | 0.035991 | -K_not_in_group |
| AM-K_not_in_group | 0.035923 | -K_not_in_group |
| AM-K_not_in_group | 0.035913 | -K_not_in_group |
| AM-K_not_in_group | 0.035906 | -K_not_in_group |
| AM-K_not_in_group | 0.035904 | -K_not_in_group |
| AM-K_not_in_group | 0.035895 | -K_not_in_group |
| AM-K_not_in_group | 0.035893 | -K_not_in_group |
| AM-K_not_in_group | 0.035871 | -K_not_in_group |
| AM-K_not_in_group | 0.035858 | -K_not_in_group |
| AM-K_not_in_group | 0.035837 | -K_not_in_group |
| AM-K_not_in_group | 0.035781 | -K_not_in_group |
| AM-K_not_in_group | 0.035762 | -K_not_in_group |
| AM-K_not_in_group | 0.035756 | -K_not_in_group |
| AM-K_not_in_group | 0.035564 | -K_not_in_group |
| AM-K_not_in_group | 0.03549  | -K_not_in_group |
| AM-K_not_in_group | 0.035434 | -K_not_in_group |
| AM-K_not_in_group | 0.035434 | -K_not_in_group |
| AM-K_not_in_group | 0.035266 | -K_not_in_group |
| AM-K_not_in_group | 0.035204 | -K_not_in_group |
| AM-K_not_in_group | 0.035094 | -K_not_in_group |
| AM-K_not_in_group | 0.035094 | -K_not_in_group |
| AM-K_not_in_group | 0.034983 | -K_not_in_group |
| AM-K_not_in_group | 0.034952 | -K_not_in_group |
| AM-K_not_in_group | 0.034926 | -K_not_in_group |
| AM-K_not_in_group | 0.034821 | -K_not_in_group |
| AM-K_not_in_group | 0.034795 | -K_not_in_group |
| AM-K_not_in_group | 0.034764 | -K_not_in_group |
| AM-K_not_in_group | 0.034744 | -K_not_in_group |



diffusion\_prioritization\_ALL

|                   |          |                 |
|-------------------|----------|-----------------|
| AM-K_not_in_group | 0.033566 | -K_not_in_group |
| AM-K_not_in_group | 0.033557 | -K_not_in_group |
| AM-K_not_in_group | 0.033537 | -K_not_in_group |
| AM-K_not_in_group | 0.033484 | -K_not_in_group |
| AM-K_not_in_group | 0.033407 | -K_not_in_group |
| AM-K_not_in_group | 0.033393 | -K_not_in_group |
| AM-K_not_in_group | 0.033393 | -K_not_in_group |
| AM-K_not_in_group | 0.033393 | -K_not_in_group |
| AM-K_not_in_group | 0.033228 | -K_not_in_group |
| AM-K_not_in_group | 0.033218 | -K_not_in_group |
| AM-K_not_in_group | 0.033137 | -K_not_in_group |
| AM-K_not_in_group | 0.033137 | -K_not_in_group |
| AM-K_not_in_group | 0.033086 | -K_not_in_group |
| AM-K_not_in_group | 0.033012 | -K_not_in_group |
| AM-K_not_in_group | 0.033009 | -K_not_in_group |
| AM-K_not_in_group | 0.032798 | -K_not_in_group |
| AM-K_not_in_group | 0.032761 | -K_not_in_group |
| AM-K_not_in_group | 0.03276  | -K_not_in_group |
| AM-K_not_in_group | 0.03274  | -K_not_in_group |
| AM-K_not_in_group | 0.032728 | -K_not_in_group |
| AM-K_not_in_group | 0.03272  | -K_not_in_group |
| AM-K_not_in_group | 0.032546 | -K_not_in_group |
| AM-K_not_in_group | 0.03254  | -K_not_in_group |
| AM-K_not_in_group | 0.032487 | -K_not_in_group |
| AM-K_not_in_group | 0.032399 | -K_not_in_group |
| AM-K_not_in_group | 0.032318 | -K_not_in_group |
| AM-K_not_in_group | 0.032194 | -K_in_group     |
| AM-K_not_in_group | 0.032184 | -K_not_in_group |
| AM-K_not_in_group | 0.032164 | -K_not_in_group |
| AM-K_not_in_group | 0.032145 | -K_not_in_group |
| AM-K_not_in_group | 0.032039 | -K_not_in_group |
| AM-K_not_in_group | 0.031963 | -K_not_in_group |
| AM-K_not_in_group | 0.031959 | -K_not_in_group |
| AM-K_not_in_group | 0.031959 | -K_in_group     |











diffusion\_prioritization\_ALL

|                   |          |                 |
|-------------------|----------|-----------------|
| AM-K_not_in_group | 0.028116 | -K_not_in_group |
| AM-K_not_in_group | 0.028116 | -K_not_in_group |
| AM-K_not_in_group | 0.028116 | -K_not_in_group |
| AM-K_not_in_group | 0.028062 | -K_not_in_group |
| AM-K_not_in_group | 0.027978 | -K_not_in_group |
| AM-K_not_in_group | 0.027974 | -K_not_in_group |
| AM-K_not_in_group | 0.027843 | -K_not_in_group |
| AM-K_not_in_group | 0.027771 | -K_not_in_group |
| AM-K_not_in_group | 0.027677 | -K_not_in_group |
| AM-K_not_in_group | 0.027634 | -K_not_in_group |
| AM-K_not_in_group | 0.027563 | -K_not_in_group |
| AM-K_not_in_group | 0.027471 | -K_not_in_group |
| AM-K_not_in_group | 0.027469 | -K_not_in_group |
| AM-K_not_in_group | 0.027443 | -K_not_in_group |
| AM-K_not_in_group | 0.027439 | -K_not_in_group |
| AM-K_not_in_group | 0.027353 | -K_not_in_group |
| AM-K_not_in_group | 0.027315 | -K_not_in_group |
| AM-K_not_in_group | 0.027315 | -K_not_in_group |
| AM-K_not_in_group | 0.027315 | -K_not_in_group |
| AM-K_not_in_group | 0.027288 | -K_not_in_group |
| AM-K_not_in_group | 0.02724  | -K_not_in_group |
| AM-K_not_in_group | 0.027231 | -K_not_in_group |
| AM-K_not_in_group | 0.027225 | -K_not_in_group |
| AM-K_not_in_group | 0.02721  | -K_not_in_group |
| AM-K_not_in_group | 0.027082 | -K_not_in_group |
| AM-K_not_in_group | 0.027049 | -K_not_in_group |
| AM-K_not_in_group | 0.027049 | -K_not_in_group |
| AM-K_not_in_group | 0.02704  | -K_not_in_group |
| AM-K_not_in_group | 0.027012 | -K_not_in_group |
| AM-K_not_in_group | 0.027012 | -K_not_in_group |
| AM-K_not_in_group | 0.026926 | -K_not_in_group |
| AM-K_not_in_group | 0.026751 | -K_not_in_group |
| AM-K_not_in_group | 0.026669 | -K_not_in_group |
| AM-K_not_in_group | 0.026624 | -K_not_in_group |
| AM-K_not_in_group | 0.026602 | -K_not_in_group |







diffusion\_prioritization\_ALL

|                   |          |                 |
|-------------------|----------|-----------------|
| AM-K_not_in_group | 0.023975 | -K_not_in_group |
| AM-K_not_in_group | 0.023939 | -K_not_in_group |
| AM-K_not_in_group | 0.023921 | -K_not_in_group |
| AM-K_not_in_group | 0.023804 | -K_not_in_group |
| AM-K_not_in_group | 0.023795 | -K_not_in_group |
| AM-K_not_in_group | 0.023758 | -K_not_in_group |
| AM-K_not_in_group | 0.023713 | -K_not_in_group |
| AM-K_not_in_group | 0.023701 | -K_not_in_group |
| AM-K_not_in_group | 0.023639 | -K_not_in_group |
| AM-K_not_in_group | 0.023582 | -K_not_in_group |
| AM-K_not_in_group | 0.023578 | -K_not_in_group |
| AM-K_not_in_group | 0.023529 | -K_not_in_group |
| AM-K_not_in_group | 0.023515 | -K_not_in_group |
| AM-K_not_in_group | 0.023469 | -K_not_in_group |
| AM-K_not_in_group | 0.023431 | -K_not_in_group |
| AM-K_not_in_group | 0.023372 | -K_not_in_group |
| AM-K_not_in_group | 0.023366 | -K_not_in_group |
| AM-K_not_in_group | 0.023307 | -K_not_in_group |
| AM-K_not_in_group | 0.023301 | -K_not_in_group |
| AM-K_not_in_group | 0.02328  | -K_not_in_group |
| AM-K_not_in_group | 0.023231 | -K_not_in_group |
| AM-K_not_in_group | 0.023204 | -K_not_in_group |
| AM-K_not_in_group | 0.023197 | -K_not_in_group |
| AM-K_not_in_group | 0.023197 | -K_not_in_group |
| AM-K_not_in_group | 0.023081 | -K_not_in_group |
| AM-K_not_in_group | 0.023079 | -K_not_in_group |
| AM-K_not_in_group | 0.023048 | -K_not_in_group |
| AM-K_not_in_group | 0.022942 | -K_not_in_group |
| AM-K_not_in_group | 0.022906 | -K_not_in_group |
| AM-K_not_in_group | 0.022805 | -K_not_in_group |
| AM-K_not_in_group | 0.0228   | -K_not_in_group |
| AM-K_not_in_group | 0.022783 | -K_not_in_group |
| AM-K_not_in_group | 0.022776 | -K_not_in_group |
| AM-K_not_in_group | 0.022761 | -K_not_in_group |
| AM-K_not_in_group | 0.022731 | -K_not_in_group |
| AM-K_not_in_group | 0.022706 | -K_not_in_group |
| AM-K_not_in_group | 0.022666 | -K_not_in_group |
| AM-K_not_in_group | 0.022666 | -K_not_in_group |
| AM-K_not_in_group | 0.022666 | -K_not_in_group |
| AM-K_not_in_group | 0.02265  | -K_not_in_group |
| AM-K_not_in_group | 0.022598 | -K_not_in_group |
| AM-K_not_in_group | 0.02257  | -K_not_in_group |
| AM-K_not_in_group | 0.022563 | -K_not_in_group |
| AM-K_not_in_group | 0.022563 | -K_not_in_group |







diffusion\_prioritization\_ALL

|                   |          |                 |
|-------------------|----------|-----------------|
| AM-K_not_in_group | 0.020963 | -K_not_in_group |
| AM-K_not_in_group | 0.020883 | -K_not_in_group |
| AM-K_not_in_group | 0.020758 | -K_not_in_group |
| AM-K_not_in_group | 0.020714 | -K_not_in_group |
| AM-K_not_in_group | 0.020686 | -K_not_in_group |
| AM-K_not_in_group | 0.020615 | -K_not_in_group |
| AM-K_not_in_group | 0.02054  | -K_not_in_group |
| AM-K_not_in_group | 0.020525 | -K_not_in_group |
| AM-K_not_in_group | 0.020451 | -K_not_in_group |
| AM-K_not_in_group | 0.020447 | -K_not_in_group |
| AM-K_not_in_group | 0.020442 | -K_not_in_group |
| AM-K_not_in_group | 0.02041  | -K_not_in_group |
| AM-K_not_in_group | 0.020394 | -K_not_in_group |
| AM-K_not_in_group | 0.020387 | -K_not_in_group |
| AM-K_not_in_group | 0.020345 | -K_not_in_group |
| AM-K_not_in_group | 0.020337 | -K_not_in_group |
| AM-K_not_in_group | 0.020337 | -K_not_in_group |
| AM-K_not_in_group | 0.02033  | -K_in_group     |
| AM-K_not_in_group | 0.02033  | -K_not_in_group |
| AM-K_not_in_group | 0.020318 | -K_not_in_group |
| AM-K_not_in_group | 0.020193 | -K_not_in_group |
| AM-K_not_in_group | 0.020138 | -K_not_in_group |
| AM-K_not_in_group | 0.020137 | -K_not_in_group |
| AM-K_not_in_group | 0.020112 | -K_not_in_group |
| AM-K_not_in_group | 0.020091 | -K_not_in_group |
| AM-K_not_in_group | 0.019878 | -K_not_in_group |
| AM-K_not_in_group | 0.019855 | -K_not_in_group |
| AM-K_not_in_group | 0.019803 | -K_not_in_group |
| AM-K_not_in_group | 0.019799 | -K_not_in_group |
| AM-K_not_in_group | 0.019783 | -K_not_in_group |
| AM-K_not_in_group | 0.019727 | -K_not_in_group |
| AM-K_not_in_group | 0.019693 | -K_not_in_group |
| AM-K_not_in_group | 0.019684 | -K_not_in_group |
| AM-K_not_in_group | 0.019684 | -K_not_in_group |
| AM-K_not_in_group | 0.019684 | -K_not_in_group |







## diffusion\_prioritization\_ALL

|                   |          |                 |
|-------------------|----------|-----------------|
| AM-K_not_in_group | 0.01732  | -K_not_in_group |
| AM-K_not_in_group | 0.017317 | -K_not_in_group |
| AM-K_not_in_group | 0.01724  | -K_not_in_group |
| AM-K_not_in_group | 0.017172 | -K_not_in_group |
| AM-K_not_in_group | 0.01716  | -K_not_in_group |
| AM-K_not_in_group | 0.017127 | -K_not_in_group |
| AM-K_not_in_group | 0.017112 | -K_not_in_group |
| AM-K_not_in_group | 0.017043 | -K_not_in_group |
| AM-K_not_in_group | 0.017015 | -K_in_group     |
| AM-K_not_in_group | 0.017011 | -K_not_in_group |
| AM-K_not_in_group | 0.017004 | -K_not_in_group |
| AM-K_not_in_group | 0.016996 | -K_not_in_group |
| AM-K_not_in_group | 0.016955 | -K_not_in_group |
| AM-K_not_in_group | 0.016955 | -K_not_in_group |
| AM-K_not_in_group | 0.01694  | -K_not_in_group |
| AM-K_not_in_group | 0.016937 | -K_not_in_group |
| AM-K_not_in_group | 0.016908 | -K_not_in_group |
| AM-K_not_in_group | 0.016902 | -K_not_in_group |
| AM-K_not_in_group | 0.016889 | -K_not_in_group |
| AM-K_not_in_group | 0.016875 | -K_not_in_group |
| AM-K_not_in_group | 0.016874 | -K_not_in_group |
| AM-K_not_in_group | 0.016874 | -K_not_in_group |
| AM-K_not_in_group | 0.016873 | -K_not_in_group |
| AM-K_not_in_group | 0.016862 | -K_not_in_group |
| AM-K_not_in_group | 0.016831 | -K_not_in_group |
| AM-K_not_in_group | 0.016831 | -K_not_in_group |
| AM-K_not_in_group | 0.016828 | -K_not_in_group |
| AM-K_not_in_group | 0.016828 | -K_not_in_group |
| AM-K_not_in_group | 0.016825 | -K_not_in_group |
| AM-K_not_in_group | 0.01681  | -K_not_in_group |
| AM-K_not_in_group | 0.016798 | -K_not_in_group |
| AM-K_not_in_group | 0.016772 | -K_not_in_group |
| AM-K_not_in_group | 0.016772 | -K_not_in_group |
| AM-K_not_in_group | 0.016772 | -K_not_in_group |



diffusion\_prioritization\_ALL

|                   |          |                 |
|-------------------|----------|-----------------|
| AM-K_not_in_group | 0.016272 | -K_in_group     |
| AM-K_not_in_group | 0.016272 | -K_not_in_group |
| AM-K_not_in_group | 0.016272 | -K_in_group     |
| AM-K_not_in_group | 0.016272 | -K_not_in_group |
| AM-K_not_in_group | 0.016272 | -K_not_in_group |
| AM-K_not_in_group | 0.01624  | -K_not_in_group |
| AM-K_not_in_group | 0.016224 | -K_not_in_group |
| AM-K_not_in_group | 0.016205 | -K_not_in_group |
| AM-K_not_in_group | 0.016204 | -K_not_in_group |
| AM-K_not_in_group | 0.016204 | -K_not_in_group |
| AM-K_not_in_group | 0.016186 | -K_not_in_group |
| AM-K_not_in_group | 0.016163 | -K_not_in_group |
| AM-K_not_in_group | 0.01613  | -K_not_in_group |
| AM-K_not_in_group | 0.016099 | -K_not_in_group |
| AM-K_not_in_group | 0.016064 | -K_not_in_group |
| AM-K_not_in_group | 0.016061 | -K_not_in_group |
| AM-K_not_in_group | 0.016057 | -K_not_in_group |
| AM-K_not_in_group | 0.016039 | -K_not_in_group |
| AM-K_not_in_group | 0.016037 | -K_not_in_group |
| AM-K_not_in_group | 0.016032 | -K_not_in_group |
| AM-K_not_in_group | 0.016012 | -K_not_in_group |
| AM-K_not_in_group | 0.016007 | -K_not_in_group |
| AM-K_not_in_group | 0.015982 | -K_not_in_group |
| AM-K_not_in_group | 0.015932 | -K_not_in_group |
| AM-K_not_in_group | 0.015931 | -K_not_in_group |
| AM-K_not_in_group | 0.01591  | -K_in_group     |
| AM-K_not_in_group | 0.015893 | -K_in_group     |
| AM-K_not_in_group | 0.015877 | -K_not_in_group |
| AM-K_not_in_group | 0.015868 | -K_not_in_group |
| AM-K_not_in_group | 0.015866 | -K_not_in_group |
| AM-K_not_in_group | 0.015866 | -K_in_group     |
| AM-K_not_in_group | 0.015865 | -K_not_in_group |
| AM-K_not_in_group | 0.015853 | -K_not_in_group |
| AM-K_not_in_group | 0.015849 | -K_not_in_group |
| AM-K_not_in_group | 0.015842 | -K_not_in_group |





## diffusion\_prioritization\_ALL

|                   |          |                 |
|-------------------|----------|-----------------|
| AM-K_not_in_group | 0.015326 | -K_not_in_group |
| AM-K_not_in_group | 0.015301 | -K_not_in_group |
| AM-K_not_in_group | 0.015301 | -K_not_in_group |
| AM-K_not_in_group | 0.015301 | -K_not_in_group |
| AM-K_not_in_group | 0.015287 | -K_not_in_group |
| AM-K_not_in_group | 0.015252 | -K_not_in_group |
| AM-K_not_in_group | 0.01525  | -K_not_in_group |
| AM-K_not_in_group | 0.015247 | -K_not_in_group |
| AM-K_not_in_group | 0.015245 | -K_not_in_group |
| AM-K_not_in_group | 0.015218 | -K_not_in_group |
| AM-K_not_in_group | 0.015217 | -K_not_in_group |
| AM-K_not_in_group | 0.015217 | -K_not_in_group |
| AM-K_not_in_group | 0.015217 | -K_not_in_group |
| AM-K_not_in_group | 0.015166 | -K_not_in_group |
| AM-K_not_in_group | 0.015158 | -K_not_in_group |
| AM-K_not_in_group | 0.015151 | -K_not_in_group |
| AM-K_not_in_group | 0.015138 | -K_not_in_group |
| AM-K_not_in_group | 0.015111 | -K_not_in_group |
| AM-K_not_in_group | 0.015085 | -K_not_in_group |
| AM-K_not_in_group | 0.015082 | -K_not_in_group |
| AM-K_not_in_group | 0.015041 | -K_not_in_group |
| AM-K_not_in_group | 0.015027 | -K_not_in_group |
| AM-K_not_in_group | 0.015022 | -K_not_in_group |
| AM-K_not_in_group | 0.015022 | -K_not_in_group |
| AM-K_not_in_group | 0.015022 | -K_not_in_group |
| AM-K_not_in_group | 0.014963 | -K_not_in_group |
| AM-K_not_in_group | 0.014951 | -K_not_in_group |
| AM-K_not_in_group | 0.014951 | -K_not_in_group |
| AM-K_not_in_group | 0.014887 | -K_not_in_group |
| AM-K_not_in_group | 0.014856 | -K_not_in_group |
| AM-K_not_in_group | 0.014844 | -K_not_in_group |
| AM-K_not_in_group | 0.014807 | -K_not_in_group |
| AM-K_not_in_group | 0.014792 | -K_not_in_group |
| AM-K_not_in_group | 0.014784 | -K_not_in_group |
| AM-K_not_in_group | 0.014783 | -K_not_in_group |
| AM-K_not_in_group | 0.014781 | -K_not_in_group |
| AM-K_not_in_group | 0.014764 | -K_not_in_group |

























## diffusion\_prioritization\_ALL

|                   |          |                 |
|-------------------|----------|-----------------|
| AM-K_not_in_group | 0.010326 | -K_not_in_group |
| AM-K_not_in_group | 0.010318 | -K_not_in_group |
| AM-K_not_in_group | 0.010301 | -K_in_group     |
| AM-K_not_in_group | 0.010269 | -K_not_in_group |
| AM-K_not_in_group | 0.01025  | -K_not_in_group |
| AM-K_not_in_group | 0.01024  | -K_not_in_group |
| AM-K_not_in_group | 0.010232 | -K_not_in_group |
| AM-K_not_in_group | 0.010231 | -K_not_in_group |
| AM-K_not_in_group | 0.010212 | -K_not_in_group |
| AM-K_not_in_group | 0.010205 | -K_not_in_group |
| AM-K_not_in_group | 0.010195 | -K_not_in_group |
| AM-K_not_in_group | 0.010178 | -K_not_in_group |
| AM-K_not_in_group | 0.010173 | -K_not_in_group |
| AM-K_not_in_group | 0.010112 | -K_not_in_group |
| AM-K_not_in_group | 0.010076 | -K_not_in_group |
| AM-K_not_in_group | 0.010076 | -K_not_in_group |
| AM-K_not_in_group | 0.010052 | -K_not_in_group |
| AM-K_not_in_group | 0.010042 | -K_not_in_group |
| AM-K_not_in_group | 0.010011 | -K_not_in_group |
| AM-K_not_in_group | 0.010011 | -K_not_in_group |
| AM-K_not_in_group | 0.009987 | -K_not_in_group |
| AM-K_not_in_group | 0.00997  | -K_in_group     |
| AM-K_not_in_group | 0.00997  | -K_not_in_group |
| AM-K_not_in_group | 0.009963 | -K_not_in_group |
| AM-K_not_in_group | 0.009946 | -K_not_in_group |
| AM-K_not_in_group | 0.009941 | -K_in_group     |
| AM-K_not_in_group | 0.009868 | -K_not_in_group |
| AM-K_not_in_group | 0.009868 | -K_not_in_group |

















diffusion\_prioritization\_ALL

|                   |          |                 |
|-------------------|----------|-----------------|
| AM-K_not_in_group | 0.008348 | -K_not_in_group |
| AM-K_not_in_group | 0.008341 | -K_not_in_group |
| AM-K_not_in_group | 0.008338 | -K_not_in_group |
| AM-K_not_in_group | 0.008317 | -K_not_in_group |
| AM-K_not_in_group | 0.008292 | -K_not_in_group |
| AM-K_not_in_group | 0.008268 | -K_not_in_group |
| AM-K_not_in_group | 0.00825  | -K_not_in_group |
| AM-K_not_in_group | 0.008241 | -K_not_in_group |
| AM-K_not_in_group | 0.008234 | -K_not_in_group |
| AM-K_not_in_group | 0.008226 | -K_not_in_group |
| AM-K_not_in_group | 0.008209 | -K_not_in_group |
| AM-K_not_in_group | 0.008199 | -K_not_in_group |
| AM-K_not_in_group | 0.008199 | -K_not_in_group |
| AM-K_not_in_group | 0.008199 | -K_not_in_group |
| AM-K_not_in_group | 0.008197 | -K_not_in_group |
| AM-K_not_in_group | 0.008193 | -K_not_in_group |
| AM-K_not_in_group | 0.008192 | -K_not_in_group |
| AM-K_not_in_group | 0.008164 | -K_not_in_group |
| AM-K_not_in_group | 0.00814  | -K_not_in_group |
| AM-K_not_in_group | 0.008122 | -K_not_in_group |
| AM-K_not_in_group | 0.008105 | -K_not_in_group |
| AM-K_not_in_group | 0.00806  | -K_not_in_group |
| AM-K_not_in_group | 0.008048 | -K_not_in_group |
| AM-K_not_in_group | 0.008045 | -K_not_in_group |
| AM-K_not_in_group | 0.008041 | -K_not_in_group |
| AM-K_not_in_group | 0.00803  | -K_not_in_group |
| AM-K_not_in_group | 0.008019 | -K_not_in_group |
| AM-K_not_in_group | 0.008011 | -K_not_in_group |
| AM-K_not_in_group | 0.008011 | -K_not_in_group |
| AM-K_not_in_group | 0.00798  | -K_not_in_group |
| AM-K_not_in_group | 0.007976 | -K_not_in_group |
| AM-K_not_in_group | 0.007944 | -K_not_in_group |
| AM-K_not_in_group | 0.007942 | -K_not_in_group |
| AM-K_not_in_group | 0.007927 | -K_not_in_group |
| AM-K_not_in_group | 0.007923 | -K_not_in_group |
| AM-K_not_in_group | 0.007922 | -K_not_in_group |























































































































































































































































diffusion\_prioritization\_ALL

|               |   |                 |
|---------------|---|-----------------|
| AM-K_in_group | 1 | -K_not_in_group |

## diffusion\_prioritization\_ALL

| <b>-K_score</b> | <b>NM-K_label</b> | <b>NM-K_score</b> |
|-----------------|-------------------|-------------------|
| 0.000465        | NM-K_not_in_group | 0.00221           |
| 0.01422         | NM-K_not_in_group | 0.027738          |
| 0.013819        | NM-K_not_in_group | 0.069303          |
| 0               | NM-K_not_in_group | 0                 |
| 0.004253        | NM-K_not_in_group | 0.002236          |
| 0.005309        | NM-K_not_in_group | 0.040862          |
| 0.088716        | NM-K_in_group     | 1                 |
| 0.139284        | NM-K_not_in_group | 0.119688          |
| 0.102876        | NM-K_not_in_group | 0.101905          |
| 0.086955        | NM-K_not_in_group | 0.01234           |
| 0.491177        | NM-K_not_in_group | 0.106579          |
| 1               | NM-K_not_in_group | 0                 |
| 0               | NM-K_not_in_group | 0                 |
| 0               | NM-K_not_in_group | 0                 |
| 0.004293        | NM-K_not_in_group | 0.098057          |
| 1               | NM-K_not_in_group | 0.018061          |
| 0.002573        | NM-K_not_in_group | 0.033832          |
| 0.00165         | NM-K_not_in_group | 0.00105           |
| 0.009258        | NM-K_not_in_group | 0.367652          |
| 0.000347        | NM-K_not_in_group | 0.004819          |
| 1               | NM-K_not_in_group | 0                 |
| 0.075758        | NM-K_not_in_group | 0                 |
| 0.075758        | NM-K_not_in_group | 0                 |
| 0.075758        | NM-K_not_in_group | 0                 |
| 0.012676        | NM-K_not_in_group | 0.007523          |
| 0.00151         | NM-K_not_in_group | 0.023764          |
| 0.048853        | NM-K_in_group     | 1                 |
| 0               | NM-K_not_in_group | 0                 |
| 0.000558        | NM-K_not_in_group | 0.006752          |
| 0.060784        | NM-K_not_in_group | 0.00004           |
| 0.060784        | NM-K_not_in_group | 0.00004           |
| 0.038636        | NM-K_not_in_group | 0.000288          |
| 0.008697        | NM-K_not_in_group | 0.001272          |
| 0.000232        | NM-K_not_in_group | 0.02649           |
| 0.000342        | NM-K_not_in_group | 0.007601          |
| 0.176492        | NM-K_not_in_group | 0.00961           |
| 1               | NM-K_not_in_group | 0.000223          |
| 0.001323        | NM-K_not_in_group | 0.026014          |
| 0.208083        | NM-K_not_in_group | 0.011109          |
| 0               | NM-K_not_in_group | 0                 |
| 0.085002        | NM-K_not_in_group | 0.060432          |
| 0.026224        | NM-K_not_in_group | 0.026784          |
| 0.026224        | NM-K_not_in_group | 0.026784          |
| 0.000755        | NM-K_not_in_group | 0.091629          |
| 0.006857        | NM-K_not_in_group | 0.000266          |
| 0.006857        | NM-K_not_in_group | 0.000266          |
| 0.006857        | NM-K_not_in_group | 0.000266          |
| 0.081592        | NM-K_not_in_group | 0.00039           |
| 1               | NM-K_not_in_group | 0.00039           |
| 0.094405        | NM-K_not_in_group | 0.037998          |

## diffusion\_prioritization\_ALL

|          |                   |          |
|----------|-------------------|----------|
| 0.076216 | NM-K_not_in_group | 0.020832 |
| 0.000511 | NM-K_not_in_group | 0.006224 |
| 0.000511 | NM-K_not_in_group | 0.006224 |
| 0.000511 | NM-K_not_in_group | 0.006224 |
| 0.000028 | NM-K_not_in_group | 0.000221 |
| 0.023692 | NM-K_not_in_group | 0.01141  |
| 0.001964 | NM-K_not_in_group | 0.001937 |
| 1        | NM-K_not_in_group | 0.038233 |
| 0.012401 | NM-K_not_in_group | 0.101691 |
| 0.135669 | NM-K_not_in_group | 0.062437 |
| 0.052241 | NM-K_not_in_group | 0.00168  |
| 0.00677  | NM-K_not_in_group | 0.004308 |
| 0.024029 | NM-K_not_in_group | 0.103178 |
| 0.022061 | NM-K_not_in_group | 0.020648 |
| 0.000234 | NM-K_not_in_group | 0.004163 |
| 0        | NM-K_not_in_group | 0        |
| 0.321412 | NM-K_not_in_group | 0        |
| 0        | NM-K_not_in_group | 0        |
| 0.00309  | NM-K_not_in_group | 0.021449 |
| 0.000046 | NM-K_not_in_group | 0.000043 |
| 0        | NM-K_not_in_group | 0        |
| 1        | NM-K_not_in_group | 0.048527 |
| 0.031605 | NM-K_not_in_group | 0.001616 |
| 0.010381 | NM-K_not_in_group | 0.000367 |
| 0.007323 | NM-K_not_in_group | 0.015858 |
| 0.001088 | NM-K_not_in_group | 0.116614 |
| 0.00056  | NM-K_not_in_group | 0.011264 |
| 0.002924 | NM-K_not_in_group | 0.082044 |
| 0.077612 | NM-K_not_in_group | 0.000398 |
| 0.000464 | NM-K_not_in_group | 0.002283 |
| 0.117883 | NM-K_not_in_group | 0.000672 |
| 0.000626 | NM-K_not_in_group | 0.00041  |
| 0.020728 | NM-K_not_in_group | 0.010466 |
| 0.000954 | NM-K_not_in_group | 0.000185 |
| 0.008007 | NM-K_not_in_group | 0.062676 |
| 0.000049 | NM-K_not_in_group | 0.000064 |
| 0.000122 | NM-K_not_in_group | 0.000582 |
| 0.000122 | NM-K_not_in_group | 0.000582 |
| 0.317725 | NM-K_not_in_group | 0.538091 |
| 0.016888 | NM-K_not_in_group | 0.008202 |
| 0.025999 | NM-K_not_in_group | 0.027159 |
| 0.145482 | NM-K_not_in_group | 0.004184 |
| 0.022148 | NM-K_not_in_group | 0.062929 |
| 0.001772 | NM-K_not_in_group | 0.000932 |
| 0.001772 | NM-K_not_in_group | 0.000932 |

## diffusion\_prioritization\_ALL

|          |                   |          |
|----------|-------------------|----------|
| 0.029731 | NM-K_not_in_group | 0.005781 |
| 0.040382 | NM-K_in_group     | 1        |
| 0.006909 | NM-K_not_in_group | 0.018624 |
| 0.002654 | NM-K_not_in_group | 0.002981 |
| 0.000081 | NM-K_not_in_group | 0.00043  |
| 0.007197 | NM-K_not_in_group | 0.002175 |
| 0.001824 | NM-K_not_in_group | 0.013612 |
| 0.000565 | NM-K_not_in_group | 0.002166 |
| 0.000565 | NM-K_not_in_group | 0.002166 |
| 0.029301 | NM-K_not_in_group | 0.000221 |
| 0.09124  | NM-K_not_in_group | 0.047968 |
| 0.000573 | NM-K_not_in_group | 0.001669 |
| 0.00088  | NM-K_not_in_group | 0.000171 |
| 0.00088  | NM-K_not_in_group | 0.000171 |
| 0.00088  | NM-K_not_in_group | 0.000171 |
| 0.000137 | NM-K_not_in_group | 0.000126 |
| 0.001748 | NM-K_not_in_group | 0.000256 |
| 0.072987 | NM-K_not_in_group | 0.022054 |
| 0.001012 | NM-K_not_in_group | 0.007516 |
| 0.001047 | NM-K_not_in_group | 0.00418  |
| 0.001176 | NM-K_not_in_group | 0.014315 |
| 0.00049  | NM-K_not_in_group | 0.023321 |
| 0.00195  | NM-K_not_in_group | 0.002023 |
| 0.00904  | NM-K_not_in_group | 0.000342 |
| 0.114426 | NM-K_not_in_group | 0.004786 |
| 0.000001 | NM-K_not_in_group | 0.000021 |
| 0.005768 | NM-K_not_in_group | 0.000046 |
| 0.003387 | NM-K_not_in_group | 0.000099 |
| 0.055911 | NM-K_not_in_group | 0.016772 |
| 1        | NM-K_not_in_group | 0.004473 |
| 0.047247 | NM-K_not_in_group | 0.023432 |
| 0.002743 | NM-K_not_in_group | 0.011882 |
| 0.064789 | NM-K_not_in_group | 0.011572 |
| 0.000279 | NM-K_not_in_group | 0.001477 |
| 0.000132 | NM-K_not_in_group | 0.020105 |
| 0.093799 | NM-K_not_in_group | 0.003321 |
| 0.003583 | NM-K_not_in_group | 0.000335 |
| 0.00926  | NM-K_not_in_group | 0.00186  |

## diffusion\_prioritization\_ALL

|          |                   |          |
|----------|-------------------|----------|
| 0.00926  | NM-K_not_in_group | 0.00186  |
| 0.009881 | NM-K_not_in_group | 0.052541 |
| 1        | NM-K_not_in_group | 0.001323 |
| 0.006519 | NM-K_not_in_group | 0.080181 |
| 1        | NM-K_not_in_group | 0.000306 |
| 0.000402 | NM-K_not_in_group | 0.001914 |
| 0.002816 | NM-K_not_in_group | 0.039068 |
| 0.026338 | NM-K_not_in_group | 0.009513 |
| 0.073984 | NM-K_not_in_group | 0.158785 |
| 0.000776 | NM-K_not_in_group | 0.001919 |
| 0.00241  | NM-K_in_group     | 1        |
| 0.03267  | NM-K_not_in_group | 0.001738 |
| 0.00541  | NM-K_not_in_group | 0.000236 |
| 0.00541  | NM-K_not_in_group | 0.000236 |
| 0.00541  | NM-K_not_in_group | 0.000236 |
| 0.017816 | NM-K_not_in_group | 0.073174 |
| 0.001249 | NM-K_not_in_group | 0.019797 |
| 0.003682 | NM-K_not_in_group | 0.009386 |
| 0.000535 | NM-K_not_in_group | 0.001911 |
| 0.018855 | NM-K_not_in_group | 0.000753 |
| 0.002472 | NM-K_not_in_group | 0.098519 |
| 0.004276 | NM-K_not_in_group | 0.000831 |
| 0.002419 | NM-K_not_in_group | 0.415921 |
| 0.067791 | NM-K_not_in_group | 0.039409 |
| 0.002412 | NM-K_not_in_group | 0.000523 |
| 0.029412 | NM-K_not_in_group | 0.011711 |
| 0.004654 | NM-K_not_in_group | 0.001515 |
| 0.003487 | NM-K_not_in_group | 0.00151  |
| 0.000535 | NM-K_not_in_group | 0.003121 |
| 0.036525 | NM-K_not_in_group | 0.125673 |
| 0        | NM-K_not_in_group | 0        |
| 0        | NM-K_not_in_group | 0        |
| 0.005856 | NM-K_not_in_group | 0.030642 |
| 0.021432 | NM-K_not_in_group | 0.002273 |
| 0.012118 | NM-K_not_in_group | 0.000376 |
| 0.007073 | NM-K_not_in_group | 0.008595 |
| 0.00056  | NM-K_not_in_group | 0.00216  |
| 0.00056  | NM-K_not_in_group | 0.00216  |
| 0.00056  | NM-K_not_in_group | 0.00216  |
| 0.000272 | NM-K_not_in_group | 0.001243 |
| 0.000273 | NM-K_not_in_group | 0.000354 |



diffusion\_prioritization\_ALL

|          |                   |          |
|----------|-------------------|----------|
| 0.022002 | NM-K_not_in_group | 0.020313 |
| 0.022002 | NM-K_not_in_group | 0.020313 |
| 1        | NM-K_not_in_group | 0.035829 |
| 0.136599 | NM-K_not_in_group | 0.012808 |
| 0.001434 | NM-K_not_in_group | 0.057444 |
| 0.002174 | NM-K_not_in_group | 0.004416 |
| 0.007246 | NM-K_not_in_group | 0.004271 |
| 0.000558 | NM-K_not_in_group | 0.001616 |
| 0.003526 | NM-K_not_in_group | 0.008809 |
| 0.00553  | NM-K_not_in_group | 0.035928 |
| 0.002334 | NM-K_in_group     | 1        |
| 0.003219 | NM-K_not_in_group | 0.001394 |
| 0.014778 | NM-K_not_in_group | 0.016804 |
| 0.004949 | NM-K_not_in_group | 0.0518   |
| 0.004292 | NM-K_not_in_group | 0.012279 |
| 0.222725 | NM-K_not_in_group | 0.014674 |
| 0.003194 | NM-K_not_in_group | 0.016018 |
| 0.003194 | NM-K_not_in_group | 0.016018 |
| 0.003194 | NM-K_not_in_group | 0.016018 |
| 0.014565 | NM-K_not_in_group | 0.001259 |
| 0.020594 | NM-K_not_in_group | 0.01965  |
| 0.036696 | NM-K_not_in_group | 0.032134 |
| 0.000639 | NM-K_not_in_group | 0.001697 |
| 0.009447 | NM-K_not_in_group | 0.004006 |
| 0.036001 | NM-K_not_in_group | 0.083411 |
| 0.002666 | NM-K_not_in_group | 0.00339  |
| 0.003413 | NM-K_not_in_group | 0.007609 |
| 0.007062 | NM-K_not_in_group | 0.003357 |
| 0.045141 | NM-K_not_in_group | 0.005396 |
| 1        | NM-K_not_in_group | 0.005396 |
| 0.045141 | NM-K_not_in_group | 0.005396 |
| 0.000119 | NM-K_not_in_group | 0.000525 |
| 0.003623 | NM-K_not_in_group | 0.000513 |
| 0.002916 | NM-K_not_in_group | 0.011863 |
| 0.038242 | NM-K_not_in_group | 0.028456 |
| 0.000054 | NM-K_not_in_group | 0.000424 |
| 0.001458 | NM-K_not_in_group | 0.003811 |
| 1        | NM-K_not_in_group | 0.005244 |

diffusion\_prioritization\_ALL

|          |                   |          |
|----------|-------------------|----------|
| 0.014717 | NM-K_not_in_group | 0.032249 |
| 0.000604 | NM-K_not_in_group | 0.000384 |
| 0.000782 | NM-K_not_in_group | 0.005036 |
| 0.017048 | NM-K_not_in_group | 0.001509 |
| 0.002357 | NM-K_not_in_group | 0.013163 |
| 0.001855 | NM-K_not_in_group | 0.005883 |
| 0.00413  | NM-K_in_group     | 1        |
| 0.003303 | NM-K_not_in_group | 0.013613 |
| 0.000056 | NM-K_not_in_group | 0.000901 |
| 0.147316 | NM-K_not_in_group | 0.011138 |
| 0.000586 | NM-K_not_in_group | 0.009586 |
| 0.000834 | NM-K_not_in_group | 0.001455 |
| 0.003968 | NM-K_not_in_group | 0.006305 |
| 0.011703 | NM-K_not_in_group | 0.017065 |
| 0.002098 | NM-K_not_in_group | 0.000307 |
| 0.001028 | NM-K_not_in_group | 0.00153  |
| 0.05466  | NM-K_not_in_group | 0.034843 |
| 0.002879 | NM-K_not_in_group | 0.014438 |
| 0.000721 | NM-K_not_in_group | 0.008768 |
| 0.000721 | NM-K_not_in_group | 0.008768 |
| 0.023379 | NM-K_in_group     | 1        |
| 1        | NM-K_not_in_group | 0.1131   |
| 0.023379 | NM-K_not_in_group | 0.1131   |
| 0.023379 | NM-K_not_in_group | 0.1131   |
| 0.023379 | NM-K_not_in_group | 0.1131   |
| 0.010355 | NM-K_not_in_group | 0.004459 |
| 0.055936 | NM-K_not_in_group | 0.002423 |
| 0.01434  | NM-K_not_in_group | 0.001839 |
| 0.000532 | NM-K_not_in_group | 0.003066 |
| 0.008582 | NM-K_not_in_group | 0.013655 |
| 0.018151 | NM-K_not_in_group | 0.016757 |
| 0.018151 | NM-K_not_in_group | 0.016757 |
| 0.018151 | NM-K_not_in_group | 0.016757 |
| 0.018151 | NM-K_in_group     | 1        |
| 0.018151 | NM-K_not_in_group | 0.016757 |
| 0.018151 | NM-K_not_in_group | 0.016757 |
| 0.09327  | NM-K_in_group     | 1        |
| 0.017442 | NM-K_not_in_group | 0.006021 |
| 0.037963 | NM-K_not_in_group | 0.012533 |
| 0.027031 | NM-K_not_in_group | 0.001162 |
| 0.114582 | NM-K_not_in_group | 0.053477 |
| 0.019716 | NM-K_not_in_group | 0.025885 |
| 0.000562 | NM-K_not_in_group | 0.000109 |
| 0.001417 | NM-K_not_in_group | 0.017337 |
| 0.139803 | NM-K_not_in_group | 0.000093 |
| 0.139803 | NM-K_not_in_group | 0.000093 |
| 0.00071  | NM-K_not_in_group | 0.000982 |
| 0.000561 | NM-K_not_in_group | 0.000357 |
| 0.000561 | NM-K_not_in_group | 0.000357 |
| 0.002234 | NM-K_not_in_group | 0.035226 |
| 0.000029 | NM-K_not_in_group | 0.000038 |

## diffusion\_prioritization\_ALL

|          |                   |          |
|----------|-------------------|----------|
| 0.03991  | NM-K_not_in_group | 0.006213 |
| 0.000722 | NM-K_not_in_group | 0.004649 |
| 0.001168 | NM-K_not_in_group | 0.003017 |
| 0.036704 | NM-K_not_in_group | 0.031541 |
| 0.036633 | NM-K_in_group     | 1        |
| 0.005936 | NM-K_not_in_group | 0.00416  |
| 0.000118 | NM-K_not_in_group | 0.001639 |
| 0.010742 | NM-K_not_in_group | 0.301443 |
| 0.019387 | NM-K_not_in_group | 0.011638 |
| 0.018396 | NM-K_not_in_group | 0.002205 |
| 0.009789 | NM-K_not_in_group | 0.008264 |
| 0.04669  | NM-K_not_in_group | 0.000623 |
| 0.008409 | NM-K_not_in_group | 0.007584 |
| 0.106303 | NM-K_not_in_group | 0.011592 |
| 0        | NM-K_not_in_group | 0        |
| 0        | NM-K_not_in_group | 0        |
| 0        | NM-K_not_in_group | 0        |
| 1        | NM-K_not_in_group | 0.013671 |
| 0.004241 | NM-K_not_in_group | 0.001281 |
| 0.014452 | NM-K_not_in_group | 0.009804 |
| 1        | NM-K_not_in_group | 0.018989 |
| 0.002428 | NM-K_not_in_group | 0.000104 |
| 0.006907 | NM-K_not_in_group | 0.186163 |
| 0.003606 | NM-K_not_in_group | 0.006004 |
| 0.034923 | NM-K_not_in_group | 0.143763 |
| 0.000112 | NM-K_not_in_group | 0.002003 |
| 0.001884 | NM-K_not_in_group | 0.006243 |
| 0.002365 | NM-K_not_in_group | 0.010937 |
| 0.002599 | NM-K_not_in_group | 0.012302 |
| 0.203822 | NM-K_not_in_group | 0.211619 |
| 0.000022 | NM-K_not_in_group | 0.00002  |
| 0.000022 | NM-K_not_in_group | 0.00002  |
| 0.000468 | NM-K_not_in_group | 0.000653 |
| 0.030205 | NM-K_not_in_group | 0.005165 |

diffusion\_prioritization\_ALL

|          |                   |          |
|----------|-------------------|----------|
| 0.003178 | NM-K_not_in_group | 0.006218 |
| 0.005596 | NM-K_not_in_group | 0.001755 |
| 0.002201 | NM-K_not_in_group | 0.004294 |
| 0.014242 | NM-K_not_in_group | 0.013533 |
| 0.018325 | NM-K_not_in_group | 0.089683 |
| 0.046623 | NM-K_not_in_group | 0.017575 |
| 0.003236 | NM-K_not_in_group | 0.122365 |
| 0.194339 | NM-K_not_in_group | 0.000196 |
| 0.010393 | NM-K_not_in_group | 0.01348  |
| 0.007246 | NM-K_not_in_group | 0.000252 |
| 0.007246 | NM-K_not_in_group | 0.000252 |
| 0.007246 | NM-K_not_in_group | 0.000252 |
| 0.008175 | NM-K_not_in_group | 0.002177 |
| 0.003993 | NM-K_not_in_group | 0.002369 |
| 0.038527 | NM-K_not_in_group | 0.004249 |
| 0.00019  | NM-K_not_in_group | 0.002297 |
| 0.00019  | NM-K_not_in_group | 0.002297 |
| 0.00019  | NM-K_not_in_group | 0.002297 |
| 0.000269 | NM-K_not_in_group | 0.00542  |
| 0.000895 | NM-K_not_in_group | 0.005802 |
| 0.013027 | NM-K_not_in_group | 0.003498 |
| 0.000476 | NM-K_not_in_group | 0.007485 |
| 0.000301 | NM-K_not_in_group | 0.000197 |
| 0.002032 | NM-K_not_in_group | 0.003964 |
| 0.00262  | NM-K_not_in_group | 0.005088 |
| 0.083025 | NM-K_not_in_group | 0.052829 |
| 0.06297  | NM-K_not_in_group | 0.014435 |
| 0.002491 | NM-K_not_in_group | 0.00011  |
| 0.007745 | NM-K_not_in_group | 0.000265 |

diffusion\_prioritization\_ALL

|          |                   |          |
|----------|-------------------|----------|
| 0.00093  | NM-K_not_in_group | 0.013646 |
| 0.000256 | NM-K_not_in_group | 0.000236 |
| 0.017048 | NM-K_not_in_group | 0.089979 |
| 0.034015 | NM-K_not_in_group | 0.039573 |
| 0.008786 | NM-K_not_in_group | 0.031639 |
| 0.003319 | NM-K_not_in_group | 0.014645 |
| 0.003319 | NM-K_in_group     | 1        |
| 0.003319 | NM-K_not_in_group | 0.014645 |
| 0.003172 | NM-K_not_in_group | 0.015343 |
| 0.002748 | NM-K_not_in_group | 0.003281 |
| 0.019429 | NM-K_not_in_group | 0.159315 |
| 0.000851 | NM-K_not_in_group | 0.004263 |
| 0.000851 | NM-K_not_in_group | 0.004263 |
| 0.000851 | NM-K_not_in_group | 0.004263 |
| 0.014039 | NM-K_not_in_group | 0.013388 |
| 0.00187  | NM-K_not_in_group | 0.004384 |
| 0.000073 | NM-K_not_in_group | 0.008343 |
| 0.000073 | NM-K_not_in_group | 0.008343 |
| 0.000073 | NM-K_not_in_group | 0.008343 |
| 0.002115 | NM-K_not_in_group | 0.097678 |
| 0.001713 | NM-K_not_in_group | 0.01248  |
| 0.014097 | NM-K_not_in_group | 0.000107 |
| 0.001278 | NM-K_not_in_group | 0.001314 |
| 0.002293 | NM-K_not_in_group | 0.102138 |
| 0.011663 | NM-K_not_in_group | 0.03379  |
| 0.002055 | NM-K_not_in_group | 0.00089  |
| 0.113523 | NM-K_not_in_group | 0.024633 |
| 1        | NM-K_not_in_group | 0.024633 |
| 0.113523 | NM-K_not_in_group | 0.024633 |
| 1        | NM-K_not_in_group | 0.024633 |
| 0.113523 | NM-K_not_in_group | 0.024633 |
| 1        | NM-K_not_in_group | 0.024633 |
| 0.113523 | NM-K_in_group     | 1        |
| 1        | NM-K_not_in_group | 0.024633 |
| 0.002008 | NM-K_not_in_group | 0.146054 |
| 0.048879 | NM-K_not_in_group | 0.050805 |
| 0.088264 | NM-K_not_in_group | 0.019815 |
| 0.003187 | NM-K_not_in_group | 0.005687 |
| 0.002953 | NM-K_in_group     | 1        |
| 0.171897 | NM-K_not_in_group | 0.209535 |

## diffusion\_prioritization\_ALL

|          |                   |          |
|----------|-------------------|----------|
| 0.002453 | NM-K_not_in_group | 0.003448 |
| 0.018616 | NM-K_not_in_group | 0.003993 |
| 0.012219 | NM-K_not_in_group | 0.012978 |
| 0.037912 | NM-K_not_in_group | 0.005395 |
| 0.001986 | NM-K_not_in_group | 0.011817 |
| 0.006698 | NM-K_not_in_group | 0.018787 |
| 0.01509  | NM-K_in_group     | 1        |
| 0.034812 | NM-K_not_in_group | 0.046792 |
| 0.017507 | NM-K_not_in_group | 0.00062  |
| 0.009577 | NM-K_in_group     | 1        |
| 0.002964 | NM-K_not_in_group | 0.000651 |
| 0.000668 | NM-K_not_in_group | 0.000659 |
| 0.000668 | NM-K_not_in_group | 0.000659 |
| 0.000668 | NM-K_not_in_group | 0.000659 |
| 0.004835 | NM-K_not_in_group | 0.179077 |
| 0.002518 | NM-K_not_in_group | 0.014988 |
| 0.001397 | NM-K_not_in_group | 0.028115 |
| 0.000846 | NM-K_not_in_group | 0.012157 |
| 0.003121 | NM-K_not_in_group | 0.027678 |
| 0.001916 | NM-K_not_in_group | 0.124667 |
| 0.003869 | NM-K_not_in_group | 0.000137 |
| 0.003869 | NM-K_not_in_group | 0.000137 |
| 0.003869 | NM-K_not_in_group | 0.000137 |
| 0.001293 | NM-K_in_group     | 1        |
| 0.050077 | NM-K_not_in_group | 0.020421 |
| 0.001849 | NM-K_not_in_group | 0.001212 |
| 0.017575 | NM-K_not_in_group | 0.002494 |
| 1        | NM-K_not_in_group | 0.002494 |
| 0.017575 | NM-K_not_in_group | 0.002494 |
| 0.000369 | NM-K_not_in_group | 0.006572 |
| 0.033071 | NM-K_not_in_group | 0.002098 |
| 0.003162 | NM-K_not_in_group | 0.023272 |
| 0.000901 | NM-K_not_in_group | 0.003123 |
| 0.000708 | NM-K_not_in_group | 0.012948 |
| 0.027442 | NM-K_not_in_group | 0.001714 |
| 0.001824 | NM-K_not_in_group | 0.009146 |
| 0.002629 | NM-K_not_in_group | 0.049897 |
| 0.006128 | NM-K_not_in_group | 0.013504 |
| 0.009852 | NM-K_not_in_group | 0.010545 |
| 0.043932 | NM-K_not_in_group | 0.00025  |
| 0.043932 | NM-K_not_in_group | 0.00025  |
| 0.010201 | NM-K_not_in_group | 0.078004 |
| 0.003148 | NM-K_not_in_group | 0.012495 |
| 0.004835 | NM-K_not_in_group | 0.019309 |
| 0.00277  | NM-K_not_in_group | 0.012486 |

## diffusion\_prioritization\_ALL

|          |                   |          |
|----------|-------------------|----------|
| 0.002062 | NM-K_in_group     | 1        |
| 0.002062 | NM-K_not_in_group | 0.081883 |
| 0.001804 | NM-K_in_group     | 1        |
| 0.001804 | NM-K_in_group     | 1        |
| 0.000257 | NM-K_not_in_group | 0.000919 |
| 0.106997 | NM-K_not_in_group | 0.487358 |
| 0.002491 | NM-K_not_in_group | 0.000045 |
| 0.002765 | NM-K_not_in_group | 0.011493 |
| 0        | NM-K_not_in_group | 0        |
| 0.005062 | NM-K_not_in_group | 0.011204 |
| 0.000461 | NM-K_not_in_group | 0.002968 |
| 0.068361 | NM-K_not_in_group | 0.009743 |
| 0.000001 | NM-K_not_in_group | 0.000009 |
| 0.00021  | NM-K_not_in_group | 0.025453 |
| 0.023559 | NM-K_not_in_group | 0.063242 |
| 0.003813 | NM-K_not_in_group | 0.00284  |
| 0.003616 | NM-K_not_in_group | 0.011668 |
| 0.000272 | NM-K_not_in_group | 0.007833 |
| 0.069324 | NM-K_not_in_group | 0.0033   |
| 0.000828 | NM-K_not_in_group | 0.012151 |
| 0.009801 | NM-K_not_in_group | 0.013299 |
| 0.000577 | NM-K_not_in_group | 0.000569 |
| 0.005426 | NM-K_not_in_group | 0.041181 |
| 0.000098 | NM-K_not_in_group | 0.011007 |
| 0.001367 | NM-K_not_in_group | 0.00004  |
| 0.015627 | NM-K_not_in_group | 0.005039 |
| 0.000794 | NM-K_not_in_group | 0.011944 |
| 1        | NM-K_not_in_group | 0.001614 |
| 0.018677 | NM-K_not_in_group | 0.005049 |
| 0.01313  | NM-K_not_in_group | 0.013104 |
| 0.001424 | NM-K_not_in_group | 0.002594 |
| 0.030698 | NM-K_not_in_group | 0.093542 |
| 0.0005   | NM-K_not_in_group | 0.001281 |
| 0.00294  | NM-K_not_in_group | 0.000138 |
| 0.015781 | NM-K_not_in_group | 0.009535 |
| 0.00039  | NM-K_not_in_group | 0.001558 |
| 0.00039  | NM-K_not_in_group | 0.001558 |
| 0.00039  | NM-K_not_in_group | 0.001558 |
| 0.000954 | NM-K_not_in_group | 0.00199  |
| 0.047184 | NM-K_not_in_group | 0.001396 |
| 0.001092 | NM-K_not_in_group | 0.004096 |

## diffusion\_prioritization\_ALL

|          |                   |          |
|----------|-------------------|----------|
| 0.003121 | NM-K_not_in_group | 0.006712 |
| 0.001209 | NM-K_not_in_group | 0.013155 |
| 0.001767 | NM-K_not_in_group | 0.000529 |
| 0.034444 | NM-K_not_in_group | 0.056568 |
| 0.000954 | NM-K_not_in_group | 0.109421 |
| 0.003993 | NM-K_not_in_group | 0.067761 |
| 0.108273 | NM-K_not_in_group | 0.001688 |
| 0.001049 | NM-K_not_in_group | 0.005581 |
| 0.000655 | NM-K_not_in_group | 0.006178 |
| 0.001004 | NM-K_in_group     | 1        |
| 0.040792 | NM-K_not_in_group | 0.002221 |
| 1        | NM-K_not_in_group | 0.002221 |
| 0.109033 | NM-K_not_in_group | 0.005012 |
| 0.000183 | NM-K_not_in_group | 0.008691 |
| 0.000183 | NM-K_not_in_group | 0.008691 |
| 0.000183 | NM-K_not_in_group | 0.008691 |
| 0.018187 | NM-K_not_in_group | 0.018312 |
| 0.000003 | NM-K_not_in_group | 0.000041 |
| 0.001937 | NM-K_not_in_group | 0.000283 |
| 0.005798 | NM-K_not_in_group | 0.000236 |
| 0.149354 | NM-K_not_in_group | 0.003878 |
| 0.016568 | NM-K_not_in_group | 0.004974 |
| 0.016662 | NM-K_not_in_group | 0.000093 |
| 0.001262 | NM-K_not_in_group | 0.000037 |
| 0.001262 | NM-K_not_in_group | 0.000037 |
| 0.006529 | NM-K_not_in_group | 0.003296 |
| 0.001881 | NM-K_not_in_group | 0.001197 |
| 0.018661 | NM-K_not_in_group | 0.363029 |
| 0.001733 | NM-K_in_group     | 1        |
| 0.000182 | NM-K_not_in_group | 0.022089 |
| 0.000339 | NM-K_not_in_group | 0.002275 |



## diffusion\_prioritization\_ALL

|          |                   |          |
|----------|-------------------|----------|
| 0.000001 | NM-K_not_in_group | 0.000019 |
| 0.001354 | NM-K_in_group     | 1        |
| 0.000103 | NM-K_not_in_group | 0.000544 |
| 0.041958 | NM-K_not_in_group | 0.002748 |
| 0.001297 | NM-K_not_in_group | 0.00253  |
| 0.000344 | NM-K_not_in_group | 0.002557 |
| 0.000344 | NM-K_not_in_group | 0.002557 |
| 0.000344 | NM-K_not_in_group | 0.002557 |
| 0.014151 | NM-K_not_in_group | 0.021383 |
| 0.015677 | NM-K_not_in_group | 0.008104 |
| 0.016954 | NM-K_not_in_group | 0.004968 |
| 0.006546 | NM-K_not_in_group | 0.005071 |
| 0.000026 | NM-K_not_in_group | 0.000204 |
| 0.076294 | NM-K_not_in_group | 0.003138 |
| 0.019691 | NM-K_not_in_group | 0.000574 |
| 0.000295 | NM-K_not_in_group | 0.005794 |
| 0.000365 | NM-K_not_in_group | 0.003458 |
| 0.014899 | NM-K_not_in_group | 0.00948  |
| 1        | NM-K_not_in_group | 0.010097 |
| 0.114515 | NM-K_not_in_group | 0.000115 |
| 0.019967 | NM-K_not_in_group | 0.051138 |
| 0.000026 | NM-K_not_in_group | 0.000137 |
| 0.022973 | NM-K_not_in_group | 0.012643 |
| 0.00029  | NM-K_not_in_group | 0.000185 |
| 0.00029  | NM-K_not_in_group | 0.000185 |
| 0.00059  | NM-K_not_in_group | 0.011449 |

diffusion\_prioritization\_ALL

|          |                   |          |
|----------|-------------------|----------|
| 0.00059  | NM-K_not_in_group | 0.011449 |
| 0.000071 | NM-K_not_in_group | 0.001574 |
| 0.000527 | NM-K_not_in_group | 0.005748 |
| 0.00664  | NM-K_not_in_group | 0.02727  |
| 0.00664  | NM-K_not_in_group | 0.02727  |
| 0.038928 | NM-K_not_in_group | 0.001628 |
| 0.038928 | NM-K_not_in_group | 0.001628 |
| 1        | NM-K_not_in_group | 0.001628 |
| 0.00931  | NM-K_not_in_group | 0.000304 |
| 0.000401 | NM-K_not_in_group | 0.0007   |
| 0.057315 | NM-K_not_in_group | 0.00486  |
| 0.002222 | NM-K_not_in_group | 0.002367 |
| 0.001854 | NM-K_not_in_group | 0.008218 |
| 0.022761 | NM-K_not_in_group | 0.02235  |
| 0.003294 | NM-K_not_in_group | 0.050884 |
| 0.004976 | NM-K_not_in_group | 0.002417 |
| 0.010618 | NM-K_not_in_group | 0.000312 |
| 0.002143 | NM-K_not_in_group | 0.015693 |
| 0.000095 | NM-K_not_in_group | 0.000502 |
| 0.00651  | NM-K_not_in_group | 0.001425 |
| 0.000899 | NM-K_not_in_group | 0.000195 |
| 0.000899 | NM-K_not_in_group | 0.000195 |
| 0.000045 | NM-K_not_in_group | 0.00684  |
| 0.000045 | NM-K_not_in_group | 0.00684  |
| 0.000045 | NM-K_not_in_group | 0.00684  |
| 0.019965 | NM-K_not_in_group | 0.012451 |
| 0.018766 | NM-K_not_in_group | 0.029536 |
| 1        | NM-K_not_in_group | 0.029536 |
| 0.018766 | NM-K_in_group     | 1        |
| 0.018766 | NM-K_not_in_group | 0.029536 |
| 0.038509 | NM-K_not_in_group | 0.064591 |
| 0.038509 | NM-K_not_in_group | 0.064591 |
| 0.014756 | NM-K_not_in_group | 0.010084 |
| 0.033935 | NM-K_not_in_group | 0.054926 |
| 0.001223 | NM-K_not_in_group | 0.000114 |
| 0.039746 | NM-K_not_in_group | 0.065726 |
| 1        | NM-K_not_in_group | 0.065726 |
| 0.039746 | NM-K_in_group     | 1        |

## diffusion\_prioritization\_ALL

|          |                   |          |
|----------|-------------------|----------|
| 0.039746 | NM-K_not_in_group | 0.065726 |
| 0.039746 | NM-K_in_group     | 1        |
| 0.001403 | NM-K_not_in_group | 0.003454 |
| 0.003362 | NM-K_not_in_group | 0.017875 |
| 0.003362 | NM-K_not_in_group | 0.017875 |
| 0.003362 | NM-K_not_in_group | 0.017875 |
| 0.016975 | NM-K_not_in_group | 0.00464  |
| 0.033131 | NM-K_not_in_group | 0.003647 |
| 0.023844 | NM-K_not_in_group | 0.011916 |
| 0.020665 | NM-K_not_in_group | 0.013398 |
| 0.008581 | NM-K_not_in_group | 0.008188 |
| 0.000024 | NM-K_not_in_group | 0.000127 |
| 0.000614 | NM-K_not_in_group | 0.000637 |
| 0.002856 | NM-K_not_in_group | 0.004025 |
| 0.042542 | NM-K_not_in_group | 0.0022   |
| 0.000065 | NM-K_not_in_group | 0.001453 |
| 0.004516 | NM-K_not_in_group | 0.00014  |
| 0.004516 | NM-K_not_in_group | 0.00014  |
| 0.004516 | NM-K_not_in_group | 0.00014  |
| 0.001573 | NM-K_not_in_group | 0.000111 |
| 0.026016 | NM-K_not_in_group | 0.015287 |
| 0.007422 | NM-K_not_in_group | 0.007053 |
| 0.000632 | NM-K_not_in_group | 0.004865 |
| 0.000632 | NM-K_not_in_group | 0.004865 |
| 0.000632 | NM-K_not_in_group | 0.004865 |

diffusion\_prioritization\_ALL

|          |                   |          |
|----------|-------------------|----------|
| 0.000632 | NM-K_not_in_group | 0.004865 |
| 0.008905 | NM-K_not_in_group | 0.002695 |
| 0.008859 | NM-K_not_in_group | 0.025542 |
| 0.000371 | NM-K_not_in_group | 0.001762 |
| 0.002989 | NM-K_not_in_group | 0.001984 |
| 0.001815 | NM-K_not_in_group | 0.010452 |
| 0.14935  | NM-K_not_in_group | 0.001409 |
| 0.14935  | NM-K_not_in_group | 0.001409 |
| 0.14935  | NM-K_not_in_group | 0.001409 |
| 0.000116 | NM-K_not_in_group | 0.000903 |
| 0.004046 | NM-K_not_in_group | 0.003649 |
| 0.003516 | NM-K_not_in_group | 0.12905  |
| 0.035254 | NM-K_not_in_group | 0.057354 |
| 0.00104  | NM-K_not_in_group | 0.003793 |
| 0.020686 | NM-K_not_in_group | 0.034266 |
| 0.001314 | NM-K_not_in_group | 0.003283 |
| 0.002061 | NM-K_not_in_group | 0.013389 |
| 0.042489 | NM-K_not_in_group | 0.030842 |
| 0.049443 | NM-K_not_in_group | 0.008522 |
| 0.009135 | NM-K_not_in_group | 0.011354 |
| 0.009135 | NM-K_not_in_group | 0.011354 |
| 0.002232 | NM-K_not_in_group | 0.001174 |
| 0.006166 | NM-K_not_in_group | 0.001741 |
| 0.001735 | NM-K_not_in_group | 0.002888 |
| 0.002844 | NM-K_not_in_group | 0.001129 |
| 0.001129 | NM-K_not_in_group | 0.000106 |
| 0.001129 | NM-K_not_in_group | 0.000106 |
| 0.005098 | NM-K_not_in_group | 0.002455 |
| 0.012957 | NM-K_not_in_group | 0.004954 |
| 0.012957 | NM-K_not_in_group | 0.004954 |
| 0.011944 | NM-K_not_in_group | 0.063667 |
| 0.024462 | NM-K_not_in_group | 0.010662 |
| 1        | NM-K_not_in_group | 0.010662 |
| 1        | NM-K_not_in_group | 0.010662 |
| 0.067646 | NM-K_not_in_group | 0.002849 |

diffusion\_prioritization\_ALL

|          |                   |          |
|----------|-------------------|----------|
| 0.00065  | NM-K_not_in_group | 0.010656 |
| 0.067011 | NM-K_not_in_group | 0.030079 |
| 0.004673 | NM-K_not_in_group | 0.075606 |
| 0.014263 | NM-K_not_in_group | 0.017279 |
| 0.001509 | NM-K_not_in_group | 0.000221 |
| 0.122374 | NM-K_not_in_group | 0.000925 |
| 0.000563 | NM-K_not_in_group | 0.010067 |
| 0.000563 | NM-K_not_in_group | 0.010067 |
| 0.008296 | NM-K_not_in_group | 0.002996 |
| 0.008296 | NM-K_not_in_group | 0.002996 |
| 0.008296 | NM-K_not_in_group | 0.002996 |
| 0.000376 | NM-K_not_in_group | 0.002197 |
| 0.001099 | NM-K_not_in_group | 0.0074   |
| 0.00716  | NM-K_not_in_group | 0.006111 |
| 0.009846 | NM-K_not_in_group | 0.003184 |
| 0.084881 | NM-K_not_in_group | 0.139503 |
| 0.001106 | NM-K_not_in_group | 0.011088 |
| 0.000093 | NM-K_not_in_group | 0.000423 |
| 0.000093 | NM-K_not_in_group | 0.000423 |
| 0.002985 | NM-K_not_in_group | 0.001895 |
| 0.011162 | NM-K_not_in_group | 0.138883 |
| 0.000393 | NM-K_not_in_group | 0.006236 |
| 0.000393 | NM-K_not_in_group | 0.006236 |
| 0.00692  | NM-K_not_in_group | 0.005672 |
| 0.00436  | NM-K_not_in_group | 0.002136 |
| 0.028144 | NM-K_not_in_group | 0.050778 |
| 0.000788 | NM-K_not_in_group | 0.004415 |
| 0.000238 | NM-K_not_in_group | 0.000633 |
| 0.003026 | NM-K_not_in_group | 0.008679 |
| 0.02019  | NM-K_not_in_group | 0.007628 |
| 0.02019  | NM-K_not_in_group | 0.007628 |
| 0.016954 | NM-K_not_in_group | 0.025838 |
| 0.016954 | NM-K_not_in_group | 0.025838 |
| 0.016954 | NM-K_not_in_group | 0.025838 |
| 0.055795 | NM-K_not_in_group | 0.052212 |
| 0.005565 | NM-K_not_in_group | 0.015812 |
| 0.005565 | NM-K_not_in_group | 0.015812 |
| 0.005565 | NM-K_not_in_group | 0.015812 |
| 0.003603 | NM-K_not_in_group | 0.00542  |
| 0.012557 | NM-K_not_in_group | 0.005883 |
| 0.03784  | NM-K_not_in_group | 0.00202  |
| 1        | NM-K_not_in_group | 0.00202  |

## diffusion\_prioritization\_ALL

|          |                   |          |
|----------|-------------------|----------|
| 1        | NM-K_not_in_group | 0.00202  |
| 0.012389 | NM-K_not_in_group | 0.06568  |
| 0.005423 | NM-K_not_in_group | 0.003784 |
| 0.001396 | NM-K_not_in_group | 0.009141 |
| 0.006082 | NM-K_not_in_group | 0.025946 |
| 0.007483 | NM-K_not_in_group | 0.005947 |
| 0.005069 | NM-K_not_in_group | 0.006156 |
| 0.020769 | NM-K_not_in_group | 0.005775 |
| 0.008171 | NM-K_not_in_group | 0.003005 |
| 0.000089 | NM-K_not_in_group | 0.000407 |
| 0.006138 | NM-K_not_in_group | 0.014526 |
| 0.10171  | NM-K_not_in_group | 0.000288 |
| 0.000102 | NM-K_not_in_group | 0.039345 |
| 0.023886 | NM-K_not_in_group | 0.001651 |
| 0.001323 | NM-K_not_in_group | 0.014078 |
| 0.009641 | NM-K_not_in_group | 0.002371 |
| 1        | NM-K_not_in_group | 0.021305 |
| 0.006428 | NM-K_not_in_group | 0.007955 |
| 0.013745 | NM-K_not_in_group | 0.020869 |
| 0.002514 | NM-K_not_in_group | 0.000788 |
| 0.007024 | NM-K_not_in_group | 0.017879 |
| 0.015102 | NM-K_not_in_group | 0.010737 |
| 1        | NM-K_not_in_group | 0.010737 |
| 0.015102 | NM-K_not_in_group | 0.010737 |
| 0.015102 | NM-K_not_in_group | 0.010737 |
| 0.015102 | NM-K_not_in_group | 0.010737 |
| 0.0338   | NM-K_not_in_group | 0.025372 |
| 0.066192 | NM-K_not_in_group | 0.007983 |
| 0.002316 | NM-K_not_in_group | 0.040501 |
| 0.013244 | NM-K_not_in_group | 0.008682 |
| 0.000087 | NM-K_not_in_group | 0.000113 |
| 0.011718 | NM-K_not_in_group | 0.022626 |
| 0.006789 | NM-K_not_in_group | 0.043479 |
| 0.037743 | NM-K_not_in_group | 0.008134 |
| 0.015795 | NM-K_not_in_group | 0.008225 |
| 0.027397 | NM-K_not_in_group | 0.070402 |
| 0.001849 | NM-K_not_in_group | 0.08795  |
| 0.039898 | NM-K_not_in_group | 0.017549 |
| 0.015083 | NM-K_not_in_group | 0.023568 |
| 0.115281 | NM-K_not_in_group | 0.000367 |
| 0.014551 | NM-K_not_in_group | 0.059901 |
| 0.000539 | NM-K_not_in_group | 0.012319 |
| 0.000539 | NM-K_in_group     | 1        |

diffusion\_prioritization\_ALL

|          |                   |          |
|----------|-------------------|----------|
| 0.000539 | NM-K_in_group     | 1        |
| 0.000539 | NM-K_not_in_group | 0.012319 |
| 0.000221 | NM-K_not_in_group | 0.001746 |
| 0.019632 | NM-K_not_in_group | 0.010895 |
| 0.162001 | NM-K_not_in_group | 0.034166 |
| 0.015669 | NM-K_not_in_group | 0.005889 |
| 0.019009 | NM-K_not_in_group | 0.169862 |
| 0.001309 | NM-K_not_in_group | 0.003797 |
| 0.107219 | NM-K_not_in_group | 0.375808 |
| 0.000863 | NM-K_not_in_group | 0.000256 |
| 0.001121 | NM-K_not_in_group | 0.003031 |
| 0.054992 | NM-K_not_in_group | 0.003256 |
| 1        | NM-K_not_in_group | 0.000298 |
| 0.033364 | NM-K_not_in_group | 0.001861 |
| 0.033364 | NM-K_not_in_group | 0.001861 |
| 0.016699 | NM-K_not_in_group | 0.000086 |
| 0.016041 | NM-K_not_in_group | 0.06006  |
| 0.007904 | NM-K_not_in_group | 0.002605 |
| 0.000764 | NM-K_not_in_group | 0.008442 |
| 0.013444 | NM-K_in_group     | 1        |
| 0.024065 | NM-K_not_in_group | 0.083573 |
| 0.000722 | NM-K_not_in_group | 0.001876 |
| 0.004225 | NM-K_not_in_group | 0.029394 |
| 0.001299 | NM-K_not_in_group | 0.011158 |
| 0.073528 | NM-K_not_in_group | 0.156808 |
| 0.016465 | NM-K_not_in_group | 0.021683 |
| 0.000355 | NM-K_not_in_group | 0.00035  |
| 0.014313 | NM-K_not_in_group | 0.022936 |
| 0.00008  | NM-K_not_in_group | 0.000104 |
| 0.001348 | NM-K_in_group     | 1        |
| 0.000208 | NM-K_not_in_group | 0.01885  |
| 0.001131 | NM-K_not_in_group | 0.056441 |

## diffusion\_prioritization\_ALL

|          |                   |          |
|----------|-------------------|----------|
| 0.010032 | NM-K_not_in_group | 0.003341 |
| 0.000633 | NM-K_not_in_group | 0.002007 |
| 0.014109 | NM-K_not_in_group | 0.012109 |
| 0.006228 | NM-K_not_in_group | 0.055785 |
| 0.011881 | NM-K_not_in_group | 0.016785 |
| 0.003846 | NM-K_not_in_group | 0.107601 |
| 0.005135 | NM-K_not_in_group | 0.002739 |
| 0.000742 | NM-K_not_in_group | 0.010295 |
| 0.000591 | NM-K_not_in_group | 0.000664 |
| 0.011771 | NM-K_not_in_group | 0.029678 |
| 0.019598 | NM-K_not_in_group | 0.010571 |
| 0.001293 | NM-K_not_in_group | 0.000421 |
| 0.019497 | NM-K_not_in_group | 0.041844 |
| 0.019497 | NM-K_not_in_group | 0.041844 |
| 0.019497 | NM-K_in_group     | 1        |
| 0.019497 | NM-K_not_in_group | 0.041844 |
| 0.005357 | NM-K_not_in_group | 0.018385 |
| 0.001437 | NM-K_not_in_group | 0.005792 |
| 0.013614 | NM-K_not_in_group | 0.000785 |
| 0.099173 | NM-K_not_in_group | 0.033794 |
| 0.000519 | NM-K_not_in_group | 0.003767 |
| 0.057924 | NM-K_not_in_group | 0.055736 |
| 0.0002   | NM-K_not_in_group | 0.00327  |
| 0.000576 | NM-K_not_in_group | 0.000748 |
| 0.000478 | NM-K_not_in_group | 0.000441 |
| 0.0174   | NM-K_not_in_group | 0.000232 |
| 0.0174   | NM-K_not_in_group | 0.000232 |
| 0.017032 | NM-K_not_in_group | 0.009534 |
| 0.011931 | NM-K_not_in_group | 0.006177 |
| 0.000361 | NM-K_not_in_group | 0.037553 |
| 0.017326 | NM-K_not_in_group | 0.002056 |
| 0.007945 | NM-K_not_in_group | 0.003163 |
| 0.014843 | NM-K_not_in_group | 0.033393 |
| 0.000425 | NM-K_not_in_group | 0.001558 |
| 0.01824  | NM-K_not_in_group | 0.002596 |
| 0.001382 | NM-K_not_in_group | 0.081653 |
| 0.001538 | NM-K_not_in_group | 0.008388 |
| 0.017326 | NM-K_not_in_group | 0.090019 |



diffusion\_prioritization\_ALL

|          |                   |          |
|----------|-------------------|----------|
| 0.004637 | NM-K_not_in_group | 0.01605  |
| 0.000806 | NM-K_not_in_group | 0.000024 |
| 0.000577 | NM-K_not_in_group | 0.000593 |
| 0.0014   | NM-K_not_in_group | 0.003032 |
| 0.00284  | NM-K_not_in_group | 0.003459 |
| 0.000284 | NM-K_not_in_group | 0.003459 |
| 0.013737 | NM-K_not_in_group | 0.000453 |
| 0.040609 | NM-K_not_in_group | 0.051345 |
| 0.040609 | NM-K_not_in_group | 0.051345 |
| 0.002005 | NM-K_not_in_group | 0.005459 |
| 0.009139 | NM-K_not_in_group | 0.00889  |
| 0.006074 | NM-K_not_in_group | 0.102904 |
| 0.019897 | NM-K_not_in_group | 0.055185 |
| 0.021273 | NM-K_not_in_group | 0.00277  |
| 0.017564 | NM-K_not_in_group | 0.01405  |
| 0.010099 | NM-K_not_in_group | 0.010449 |
| 0.009407 | NM-K_not_in_group | 0.009626 |
| 1        | NM-K_not_in_group | 0.000077 |
| 0.001618 | NM-K_not_in_group | 0.012668 |
| 0.029219 | NM-K_not_in_group | 0.05085  |
| 0.000294 | NM-K_not_in_group | 0.003873 |

diffusion\_prioritization\_ALL

|          |                   |          |
|----------|-------------------|----------|
| 0.000294 | NM-K_not_in_group | 0.003873 |
| 0.028025 | NM-K_not_in_group | 0.002741 |
| 0.014609 | NM-K_not_in_group | 0.00588  |
| 0.000275 | NM-K_not_in_group | 0.001724 |
| 0.029895 | NM-K_not_in_group | 0.130666 |
| 0.000584 | NM-K_not_in_group | 0.001853 |
| 0.000584 | NM-K_not_in_group | 0.001853 |
| 0.000584 | NM-K_not_in_group | 0.001853 |
| 0.003984 | NM-K_not_in_group | 0.001956 |
| 0.002116 | NM-K_not_in_group | 0.005855 |
| 0.001322 | NM-K_not_in_group | 0.006393 |
| 0.001322 | NM-K_not_in_group | 0.006393 |
| 0.001573 | NM-K_not_in_group | 0.019344 |
| 0.001043 | NM-K_not_in_group | 0.135212 |
| 0.000185 | NM-K_not_in_group | 0.003019 |
| 0.002766 | NM-K_not_in_group | 0.043843 |
| 0.007769 | NM-K_not_in_group | 0.000251 |
| 0.006134 | NM-K_not_in_group | 0.007835 |
| 0.001302 | NM-K_not_in_group | 0.002184 |
| 0.004365 | NM-K_not_in_group | 0.017174 |
| 0.000922 | NM-K_not_in_group | 0.05998  |
| 0.003782 | NM-K_not_in_group | 0.059831 |
| 0.00739  | NM-K_not_in_group | 0.002943 |
| 0.001269 | NM-K_not_in_group | 0.00007  |
| 0.000003 | NM-K_not_in_group | 0.000042 |
| 0.011939 | NM-K_not_in_group | 0.01058  |
| 1        | NM-K_not_in_group | 0.004085 |
| 0.012107 | NM-K_in_group     | 1        |
| 0.017149 | NM-K_not_in_group | 0.011381 |
| 0.000663 | NM-K_not_in_group | 0.009195 |
| 0.001068 | NM-K_not_in_group | 0.000151 |
| 0.000333 | NM-K_not_in_group | 0.03677  |
| 0.004917 | NM-K_not_in_group | 0.003335 |
| 0.004917 | NM-K_not_in_group | 0.003335 |
| 0.004917 | NM-K_not_in_group | 0.003335 |
| 0.061868 | NM-K_not_in_group | 0.004076 |
| 1        | NM-K_not_in_group | 0.004076 |

## diffusion\_prioritization\_ALL

|          |                   |          |
|----------|-------------------|----------|
| 0.02713  | NM-K_not_in_group | 0.003872 |
| 0.01443  | NM-K_not_in_group | 0.002577 |
| 0.000533 | NM-K_not_in_group | 0.000548 |
| 0.005494 | NM-K_not_in_group | 0.001897 |
| 0.000573 | NM-K_not_in_group | 0.001164 |
| 0.000625 | NM-K_not_in_group | 0.00472  |
| 0.020891 | NM-K_not_in_group | 0.00074  |
| 0.000225 | NM-K_not_in_group | 0.001711 |
| 0.001154 | NM-K_not_in_group | 0.010042 |
| 0.000877 | NM-K_not_in_group | 0.0044   |
| 0.000877 | NM-K_not_in_group | 0.0044   |
| 0.000347 | NM-K_not_in_group | 0.00522  |
| 0.01256  | NM-K_not_in_group | 0.000931 |
| 0.007189 | NM-K_not_in_group | 0.017399 |
| 0.001912 | NM-K_not_in_group | 0.00036  |
| 0.018579 | NM-K_not_in_group | 0.009277 |
| 0.002624 | NM-K_not_in_group | 0.001113 |
| 0.000061 | NM-K_not_in_group | 0.000321 |
| 0.014086 | NM-K_not_in_group | 0.008847 |
| 0.014086 | NM-K_not_in_group | 0.008847 |
| 0.007426 | NM-K_not_in_group | 0.078965 |
| 0.001328 | NM-K_not_in_group | 0.00237  |
| 0.012844 | NM-K_not_in_group | 0.003153 |
| 0.022279 | NM-K_not_in_group | 0.014628 |
| 0.008436 | NM-K_not_in_group | 0.009639 |
| 0.000948 | NM-K_not_in_group | 0.002114 |
| 0.000948 | NM-K_not_in_group | 0.002114 |
| 0.001696 | NM-K_not_in_group | 0.039481 |
| 0.003448 | NM-K_not_in_group | 0.005028 |
| 0.003448 | NM-K_not_in_group | 0.005028 |

## diffusion\_prioritization\_ALL

|          |                   |          |
|----------|-------------------|----------|
| 0.003448 | NM-K_not_in_group | 0.005028 |
| 0.089842 | NM-K_not_in_group | 0.000353 |
| 0.000701 | NM-K_not_in_group | 0.002372 |
| 0.003894 | NM-K_not_in_group | 0.004428 |
| 0.003894 | NM-K_not_in_group | 0.004428 |
| 0.010276 | NM-K_not_in_group | 0.001757 |
| 0.001452 | NM-K_not_in_group | 0.017858 |
| 0.001452 | NM-K_in_group     | 1        |
| 0.001452 | NM-K_not_in_group | 0.017858 |
| 0.006281 | NM-K_not_in_group | 0.062619 |
| 0.015614 | NM-K_not_in_group | 0.019494 |
| 0.128957 | NM-K_not_in_group | 0.000855 |
| 0.000159 | NM-K_not_in_group | 0.000221 |
| 0.015604 | NM-K_not_in_group | 0.107031 |
| 0.001352 | NM-K_not_in_group | 0.059618 |
| 0.002984 | NM-K_not_in_group | 0.00379  |
| 0.003279 | NM-K_not_in_group | 0.013857 |
| 0.003279 | NM-K_not_in_group | 0.013857 |
| 0.003279 | NM-K_not_in_group | 0.013857 |
| 0.004564 | NM-K_not_in_group | 0.002581 |
| 0.000015 | NM-K_not_in_group | 0.000081 |
| 0.002172 | NM-K_not_in_group | 0.007401 |
| 0.000658 | NM-K_not_in_group | 0.102924 |
| 0.000157 | NM-K_not_in_group | 0.000903 |
| 0.009252 | NM-K_not_in_group | 0.105288 |
| 0.000042 | NM-K_not_in_group | 0.000928 |
| 0.011463 | NM-K_not_in_group | 0.117967 |
| 0.004369 | NM-K_not_in_group | 0.006193 |
| 0.0113   | NM-K_not_in_group | 0.00339  |
| 0.00844  | NM-K_not_in_group | 0.014225 |
| 0.007819 | NM-K_not_in_group | 0.000251 |

## diffusion\_prioritization\_ALL

|          |                   |          |
|----------|-------------------|----------|
| 0.007819 | NM-K_not_in_group | 0.000251 |
| 0.010051 | NM-K_not_in_group | 0.007642 |
| 0.000099 | NM-K_not_in_group | 0.012027 |
| 0.001743 | NM-K_not_in_group | 0.001027 |
| 0.003596 | NM-K_not_in_group | 0.015443 |
| 0.011289 | NM-K_not_in_group | 0.005553 |
| 0.000825 | NM-K_not_in_group | 0.003253 |
| 0.002696 | NM-K_not_in_group | 0.007193 |
| 0.019986 | NM-K_not_in_group | 0.009198 |
| 1        | NM-K_not_in_group | 0.009198 |
| 0.019986 | NM-K_not_in_group | 0.009198 |
| 0.019986 | NM-K_not_in_group | 0.009198 |
| 0.021174 | NM-K_not_in_group | 0.01179  |
| 0.000015 | NM-K_not_in_group | 0.000245 |
| 0.005166 | NM-K_not_in_group | 0.001005 |
| 0.005166 | NM-K_not_in_group | 0.001005 |
| 0.005166 | NM-K_not_in_group | 0.001005 |

## diffusion\_prioritization\_ALL

|          |                   |          |
|----------|-------------------|----------|
| 0.005166 | NM-K_not_in_group | 0.001005 |
| 0.00072  | NM-K_not_in_group | 0.000067 |
| 0.002384 | NM-K_not_in_group | 0.003793 |
| 0.002384 | NM-K_not_in_group | 0.003793 |
| 0.002384 | NM-K_not_in_group | 0.003793 |
| 0.000147 | NM-K_not_in_group | 0.000206 |
| 0.018346 | NM-K_not_in_group | 0.00096  |
| 0.017926 | NM-K_not_in_group | 0.008627 |
| 0.001201 | NM-K_not_in_group | 0.003236 |
| 0.001944 | NM-K_not_in_group | 0.002313 |
| 0.026977 | NM-K_not_in_group | 0.001457 |
| 1        | NM-K_not_in_group | 0.001457 |
| 0.026977 | NM-K_not_in_group | 0.001457 |
| 0.008139 | NM-K_not_in_group | 0.001878 |
| 0.015817 | NM-K_not_in_group | 0.030991 |
| 0.003878 | NM-K_not_in_group | 0.008498 |
| 0.00067  | NM-K_not_in_group | 0.000852 |
| 0.00067  | NM-K_not_in_group | 0.000852 |
| 0.00067  | NM-K_not_in_group | 0.000852 |

diffusion\_prioritization\_ALL

|          |                   |          |
|----------|-------------------|----------|
| 0.00067  | NM-K_not_in_group | 0.000852 |
| 0.00067  | NM-K_not_in_group | 0.000852 |
| 0.00067  | NM-K_not_in_group | 0.000852 |
| 0.011661 | NM-K_not_in_group | 0.01809  |
| 0.021238 | NM-K_not_in_group | 0.00151  |
| 0.165873 | NM-K_not_in_group | 0.000777 |
| 0.055394 | NM-K_not_in_group | 0.004056 |
| 0.002315 | NM-K_not_in_group | 0.001458 |
| 0.014495 | NM-K_not_in_group | 0.03293  |
| 0.001553 | NM-K_not_in_group | 0.153427 |
| 0.019289 | NM-K_not_in_group | 0.004399 |
| 0.000818 | NM-K_not_in_group | 0.003122 |
| 0.001501 | NM-K_not_in_group | 0.003229 |
| 0.004374 | NM-K_not_in_group | 0.004156 |
| 0.025279 | NM-K_not_in_group | 0.001648 |
| 0.013347 | NM-K_not_in_group | 0.045754 |
| 0.011297 | NM-K_not_in_group | 0.001625 |
| 0.011297 | NM-K_not_in_group | 0.001625 |
| 0.011297 | NM-K_not_in_group | 0.001625 |
| 0.01104  | NM-K_not_in_group | 0.003987 |
| 0.000798 | NM-K_not_in_group | 0.000689 |
| 0.014123 | NM-K_not_in_group | 0.00821  |
| 0.001156 | NM-K_not_in_group | 0.003117 |
| 0.000749 | NM-K_not_in_group | 0.003812 |
| 0.016302 | NM-K_not_in_group | 0.001526 |
| 0.015607 | NM-K_in_group     | 1        |
| 0.000976 | NM-K_not_in_group | 0.00032  |
| 0.00126  | NM-K_not_in_group | 0.006593 |
| 0.002729 | NM-K_not_in_group | 0.001175 |
| 0.002729 | NM-K_not_in_group | 0.001175 |
| 0.001425 | NM-K_not_in_group | 0.009912 |
| 0.029329 | NM-K_in_group     | 1        |
| 0.010938 | NM-K_not_in_group | 0.010224 |
| 0.000758 | NM-K_not_in_group | 0.070767 |
| 0.023332 | NM-K_not_in_group | 0.000671 |

## diffusion\_prioritization\_ALL

|          |                   |          |
|----------|-------------------|----------|
| 0.023332 | NM-K_not_in_group | 0.000671 |
| 0.023332 | NM-K_not_in_group | 0.000671 |
| 0.023332 | NM-K_not_in_group | 0.000671 |
| 1        | NM-K_not_in_group | 0.000671 |
| 0.023332 | NM-K_not_in_group | 0.000671 |
| 0.023332 | NM-K_not_in_group | 0.000671 |
| 0.023332 | NM-K_not_in_group | 0.000671 |
| 0.004914 | NM-K_not_in_group | 0.019456 |
| 0.000819 | NM-K_not_in_group | 0.001825 |
| 0.005196 | NM-K_not_in_group | 0.006821 |
| 0.000489 | NM-K_not_in_group | 0.084063 |
| 0.000489 | NM-K_in_group     | 1        |
| 0.000489 | NM-K_in_group     | 1        |
| 0.000489 | NM-K_not_in_group | 0.084063 |
| 0.000489 | NM-K_not_in_group | 0.084063 |
| 0.000489 | NM-K_not_in_group | 0.084063 |
| 0.000014 | NM-K_not_in_group | 0.000226 |
| 0.000554 | NM-K_not_in_group | 0.006598 |
| 0.001972 | NM-K_not_in_group | 0.053141 |
| 0.001636 | NM-K_not_in_group | 0.102008 |
| 0.008481 | NM-K_not_in_group | 0.007427 |
| 0.007227 | NM-K_not_in_group | 0.00452  |
| 0.003627 | NM-K_not_in_group | 0.011763 |
| 0.005988 | NM-K_not_in_group | 0.014737 |
| 0.002557 | NM-K_not_in_group | 0.013631 |
| 0.000057 | NM-K_not_in_group | 0.00026  |
| 0.006467 | NM-K_not_in_group | 0.005545 |
| 0.00062  | NM-K_not_in_group | 0.000789 |
| 0.004348 | NM-K_not_in_group | 0.00749  |
| 0.00044  | NM-K_not_in_group | 0.007024 |
| 0.00044  | NM-K_not_in_group | 0.007024 |
| 0.015678 | NM-K_not_in_group | 0.010434 |
| 0.002158 | NM-K_not_in_group | 0.004718 |
| 0.00078  | NM-K_not_in_group | 0.034748 |
| 0.00078  | NM-K_in_group     | 1        |



diffusion\_prioritization\_ALL

|          |                   |          |
|----------|-------------------|----------|
| 0.00066  | NM-K_not_in_group | 0.017141 |
| 0.008283 | NM-K_not_in_group | 0.01964  |
| 0.201327 | NM-K_in_group     | 1        |
| 0.001981 | NM-K_not_in_group | 0.002557 |
| 0.000521 | NM-K_not_in_group | 0.010478 |
| 0.000521 | NM-K_not_in_group | 0.010478 |
| 0.01667  | NM-K_not_in_group | 0.060437 |
| 0.114133 | NM-K_not_in_group | 0.202994 |
| 0.000683 | NM-K_not_in_group | 0.049689 |
| 0.000683 | NM-K_not_in_group | 0.049689 |
| 0.017628 | NM-K_not_in_group | 0.010735 |
| 0.002162 | NM-K_not_in_group | 0.005571 |
| 0.000028 | NM-K_not_in_group | 0.000121 |
| 0.056617 | NM-K_not_in_group | 0.058783 |
| 0.056617 | NM-K_in_group     | 1        |
| 1        | NM-K_not_in_group | 0.058783 |
| 1        | NM-K_not_in_group | 0.058783 |
| 0.010121 | NM-K_not_in_group | 0.024249 |
| 0.003149 | NM-K_not_in_group | 0.00244  |
| 0.028905 | NM-K_in_group     | 1        |
| 0.001005 | NM-K_not_in_group | 0.107655 |
| 0.001005 | NM-K_not_in_group | 0.107655 |
| 0.000113 | NM-K_not_in_group | 0.003264 |
| 0.000113 | NM-K_not_in_group | 0.003264 |
| 0.006734 | NM-K_not_in_group | 0.012229 |
| 0.159105 | NM-K_not_in_group | 0.040587 |
| 0.011705 | NM-K_not_in_group | 0.003537 |
| 0.017137 | NM-K_not_in_group | 0.001887 |
| 0.013456 | NM-K_not_in_group | 0.000583 |

## diffusion\_prioritization\_ALL

|          |                   |          |
|----------|-------------------|----------|
| 0.013456 | NM-K_not_in_group | 0.000583 |
| 0.008251 | NM-K_not_in_group | 0.001411 |
| 0.004137 | NM-K_not_in_group | 0.001716 |
| 0.030493 | NM-K_not_in_group | 0.000895 |
| 0.002928 | NM-K_not_in_group | 0.003241 |
| 1        | NM-K_not_in_group | 0.054798 |
| 0.146781 | NM-K_not_in_group | 0.16393  |
| 0.00586  | NM-K_not_in_group | 0.00404  |
| 0.00182  | NM-K_not_in_group | 0.049058 |
| 0.00182  | NM-K_not_in_group | 0.049058 |
| 0.00182  | NM-K_not_in_group | 0.049058 |
| 0.004935 | NM-K_not_in_group | 0.009891 |
| 0.014859 | NM-K_not_in_group | 0.001817 |
| 0.006983 | NM-K_not_in_group | 0.024026 |
| 0.006983 | NM-K_in_group     | 1        |
| 0.006983 | NM-K_not_in_group | 0.024026 |
| 0.001491 | NM-K_not_in_group | 0.001045 |
| 0.071478 | NM-K_not_in_group | 0.014259 |
| 0.000657 | NM-K_not_in_group | 0.002208 |
| 0.001991 | NM-K_not_in_group | 0.003141 |
| 0.002699 | NM-K_in_group     | 1        |
| 0.002699 | NM-K_not_in_group | 0.07574  |
| 0.002699 | NM-K_in_group     | 1        |
| 0.002699 | NM-K_not_in_group | 0.07574  |
| 0.002699 | NM-K_not_in_group | 0.07574  |
| 0.000796 | NM-K_not_in_group | 0.00064  |
| 0.012219 | NM-K_not_in_group | 0.009382 |
| 0.00382  | NM-K_not_in_group | 0.009601 |
| 0.003824 | NM-K_not_in_group | 0.013022 |
| 0.016611 | NM-K_not_in_group | 0.449152 |

## diffusion\_prioritization\_ALL

|          |                   |          |
|----------|-------------------|----------|
| 0.000516 | NM-K_not_in_group | 0.214921 |
| 0.001702 | NM-K_not_in_group | 0.026846 |
| 0.012322 | NM-K_not_in_group | 0.026676 |
| 0.011723 | NM-K_not_in_group | 0.011592 |
| 0.00623  | NM-K_in_group     | 1        |
| 0.000537 | NM-K_not_in_group | 0.008474 |
| 0.01159  | NM-K_not_in_group | 0.002652 |
| 0.092425 | NM-K_not_in_group | 0.000989 |
| 0.000963 | NM-K_not_in_group | 0.072996 |
| 0.002649 | NM-K_not_in_group | 0.003863 |
| 0.093947 | NM-K_not_in_group | 0.083383 |
| 0.004014 | NM-K_not_in_group | 0.009114 |
| 0.001031 | NM-K_not_in_group | 0.00755  |
| 0.014481 | NM-K_not_in_group | 0.004551 |
| 0.001727 | NM-K_not_in_group | 0.006043 |
| 0.004829 | NM-K_not_in_group | 0.023633 |
| 0.000051 | NM-K_not_in_group | 0.000067 |
| 0.002919 | NM-K_not_in_group | 0.012417 |
| 0.001676 | NM-K_not_in_group | 0.001269 |
| 0.000991 | NM-K_not_in_group | 0.002553 |
| 0.001247 | NM-K_not_in_group | 0.001617 |
| 0.010001 | NM-K_not_in_group | 0.02212  |
| 0.000001 | NM-K_not_in_group | 0.000017 |
| 0.000001 | NM-K_not_in_group | 0.000017 |
| 0.004291 | NM-K_not_in_group | 0.000834 |
| 0.010492 | NM-K_not_in_group | 0.003133 |
| 0.006185 | NM-K_not_in_group | 0.008866 |
| 0.014626 | NM-K_not_in_group | 0.012439 |
| 0.000273 | NM-K_not_in_group | 0.003386 |
| 0.001187 | NM-K_not_in_group | 0.0113   |
| 0.002295 | NM-K_not_in_group | 0.002278 |
| 0.047043 | NM-K_not_in_group | 0.049578 |
| 0.003928 | NM-K_not_in_group | 0.018678 |
| 0.000006 | NM-K_not_in_group | 0.000092 |
| 0.016667 | NM-K_not_in_group | 0.007528 |
| 0.000025 | NM-K_not_in_group | 0.000109 |
| 0.009546 | NM-K_not_in_group | 0.009873 |
| 0.009546 | NM-K_not_in_group | 0.009873 |
| 0.009546 | NM-K_not_in_group | 0.009873 |
| 0.001228 | NM-K_not_in_group | 0.002609 |
| 0.008389 | NM-K_not_in_group | 0.002849 |
| 0.003833 | NM-K_not_in_group | 0.001659 |
| 0.000257 | NM-K_not_in_group | 0.001917 |
| 0.000257 | NM-K_not_in_group | 0.001917 |

## diffusion\_prioritization\_ALL

|          |                   |          |
|----------|-------------------|----------|
| 0.000257 | NM-K_not_in_group | 0.001917 |
| 0.009207 | NM-K_not_in_group | 0.039458 |
| 0.04864  | NM-K_in_group     | 1        |
| 0.008072 | NM-K_not_in_group | 0.001961 |
| 0.001143 | NM-K_not_in_group | 0.000054 |
| 0.009095 | NM-K_not_in_group | 0.006392 |
| 0.107999 | NM-K_not_in_group | 0.061175 |
| 0.004062 | NM-K_not_in_group | 0.005517 |
| 0.052615 | NM-K_not_in_group | 0.281513 |
| 0.011524 | NM-K_not_in_group | 0.001723 |
| 0.004558 | NM-K_not_in_group | 0.002638 |
| 1        | NM-K_not_in_group | 0.041169 |
| 0.006726 | NM-K_not_in_group | 0.000037 |
| 0.004636 | NM-K_not_in_group | 0.004455 |
| 0.000056 | NM-K_not_in_group | 0.000435 |
| 0.007729 | NM-K_not_in_group | 0.005751 |
| 0.000249 | NM-K_not_in_group | 0.001858 |
| 0.015363 | NM-K_not_in_group | 0.00433  |
| 0.011297 | NM-K_not_in_group | 0.00738  |
| 0.000018 | NM-K_not_in_group | 0.000295 |
| 0.008873 | NM-K_not_in_group | 0.008964 |
| 0.008873 | NM-K_not_in_group | 0.008964 |
| 0.017773 | NM-K_not_in_group | 0.004535 |
| 0.01059  | NM-K_not_in_group | 0.003327 |
| 1        | NM-K_not_in_group | 0.001529 |
| 0.000239 | NM-K_not_in_group | 0.117124 |
| 0.006055 | NM-K_not_in_group | 0.02198  |

## diffusion\_prioritization\_ALL

|          |                   |          |
|----------|-------------------|----------|
| 0.027131 | NM-K_not_in_group | 0.003117 |
| 0.144123 | NM-K_not_in_group | 0.000049 |
| 0.001096 | NM-K_not_in_group | 0.000052 |
| 0.000153 | NM-K_not_in_group | 0.000211 |
| 0.000588 | NM-K_in_group     | 1        |
| 0.000588 | NM-K_not_in_group | 0.027133 |
| 0.000588 | NM-K_not_in_group | 0.027133 |
| 0.000588 | NM-K_not_in_group | 0.027133 |
| 0.00075  | NM-K_not_in_group | 0.00011  |
| 0.009604 | NM-K_not_in_group | 0.011057 |
| 0.009604 | NM-K_not_in_group | 0.011057 |
| 0.009604 | NM-K_not_in_group | 0.011057 |
| 0.002361 | NM-K_not_in_group | 0.000574 |
| 0.008144 | NM-K_not_in_group | 0.012044 |
| 0.004179 | NM-K_not_in_group | 0.001369 |
| 0.000373 | NM-K_not_in_group | 0.001183 |
| 0.015261 | NM-K_not_in_group | 0.054657 |
| 0.005592 | NM-K_not_in_group | 0.011352 |
| 0.002364 | NM-K_not_in_group | 0.066338 |
| 0.002364 | NM-K_not_in_group | 0.066338 |
| 0.000582 | NM-K_not_in_group | 0.000382 |
| 0.000118 | NM-K_not_in_group | 0.001927 |
| 0.000444 | NM-K_in_group     | 1        |
| 0.003119 | NM-K_not_in_group | 0.002657 |
| 0.009596 | NM-K_not_in_group | 0.006819 |
| 0.009596 | NM-K_not_in_group | 0.006819 |
| 0.023871 | NM-K_not_in_group | 0.011141 |

## diffusion\_prioritization\_ALL

|          |                   |          |
|----------|-------------------|----------|
| 0.000599 | NM-K_in_group     | 1        |
| 0.000501 | NM-K_not_in_group | 0.00153  |
| 0.002547 | NM-K_not_in_group | 0.064899 |
| 0.000735 | NM-K_not_in_group | 0.001437 |
| 0.002186 | NM-K_not_in_group | 0.056556 |
| 0.00126  | NM-K_not_in_group | 0.027912 |
| 0.039072 | NM-K_not_in_group | 0.066172 |
| 0.000588 | NM-K_not_in_group | 0.00333  |
| 0.039541 | NM-K_not_in_group | 0.072701 |
| 0.009624 | NM-K_not_in_group | 0.003486 |
| 0.001436 | NM-K_not_in_group | 0.000912 |
| 0.067125 | NM-K_not_in_group | 0.063531 |
| 0.005371 | NM-K_not_in_group | 0.06682  |
| 0.00034  | NM-K_not_in_group | 0.00035  |
| 0.000338 | NM-K_not_in_group | 0.001489 |
| 0.00621  | NM-K_not_in_group | 0.000035 |
| 0.00621  | NM-K_not_in_group | 0.000035 |
| 0.016729 | NM-K_not_in_group | 0.004268 |
| 1        | NM-K_not_in_group | 0.004268 |
| 0.016729 | NM-K_not_in_group | 0.004268 |
| 0.002098 | NM-K_not_in_group | 0.001028 |
| 0.001548 | NM-K_not_in_group | 0.001854 |
| 0.0015   | NM-K_not_in_group | 0.043915 |
| 0.001663 | NM-K_not_in_group | 0.006805 |
| 0.001234 | NM-K_not_in_group | 0.000865 |
| 0.000614 | NM-K_not_in_group | 0.003248 |
| 0.023161 | NM-K_not_in_group | 0.006505 |
| 0.002603 | NM-K_not_in_group | 0.003373 |
| 0.000688 | NM-K_not_in_group | 0.000821 |
| 0.00219  | NM-K_not_in_group | 0.013254 |
| 0.003868 | NM-K_not_in_group | 0.004383 |
| 0.0084   | NM-K_not_in_group | 0.069879 |
| 0.017385 | NM-K_not_in_group | 0.001627 |
| 0.037444 | NM-K_not_in_group | 0.063415 |
| 0.037444 | NM-K_in_group     | 1        |
| 0.037444 | NM-K_not_in_group | 0.063415 |

## diffusion\_prioritization\_ALL

|          |                   |          |
|----------|-------------------|----------|
| 0.037444 | NM-K_in_group     | 1        |
| 1        | NM-K_not_in_group | 0.063415 |
| 1        | NM-K_not_in_group | 0.063415 |
| 0.037444 | NM-K_not_in_group | 0.063415 |
| 1        | NM-K_not_in_group | 0.063415 |
| 0.037444 | NM-K_in_group     | 1        |
| 0.037444 | NM-K_in_group     | 1        |
| 0.037444 | NM-K_in_group     | 1        |
| 0.037444 | NM-K_not_in_group | 0.063415 |
| 1        | NM-K_not_in_group | 0.063415 |
| 1        | NM-K_not_in_group | 0.063415 |
| 0.037444 | NM-K_in_group     | 1        |
| 0.037444 | NM-K_in_group     | 1        |
| 0.037444 | NM-K_not_in_group | 0.063415 |
| 0.00914  | NM-K_not_in_group | 0.004151 |
| 0.000733 | NM-K_not_in_group | 0.024188 |
| 0.000927 | NM-K_not_in_group | 0.011399 |
| 0.010422 | NM-K_not_in_group | 0.003753 |
| 0.183669 | NM-K_not_in_group | 0.384918 |
| 0.031847 | NM-K_not_in_group | 0.003841 |
| 0.018122 | NM-K_not_in_group | 0.001648 |
| 0.000484 | NM-K_not_in_group | 0.006967 |
| 0.039134 | NM-K_in_group     | 1        |
| 0.039134 | NM-K_in_group     | 1        |
| 0.039134 | NM-K_in_group     | 1        |
| 0.006349 | NM-K_not_in_group | 0.072135 |
| 0.031533 | NM-K_in_group     | 1        |
| 0.000615 | NM-K_not_in_group | 0.025398 |
| 0.001465 | NM-K_in_group     | 1        |
| 0.001465 | NM-K_not_in_group | 0.053771 |
| 0.001406 | NM-K_in_group     | 1        |
| 1        | NM-K_not_in_group | 0.01221  |
| 0.019189 | NM-K_not_in_group | 0.01221  |
| 0.007219 | NM-K_not_in_group | 0.024054 |
| 0.004859 | NM-K_not_in_group | 0.031489 |
| 0.002119 | NM-K_not_in_group | 0.021529 |
| 0.002043 | NM-K_not_in_group | 0.001596 |
| 0.021835 | NM-K_not_in_group | 0.00104  |
| 0.021835 | NM-K_not_in_group | 0.00104  |

## diffusion\_prioritization\_ALL

|          |                   |          |
|----------|-------------------|----------|
| 0.004747 | NM-K_not_in_group | 0.006134 |
| 0.000686 | NM-K_not_in_group | 0.02442  |
| 0.019974 | NM-K_not_in_group | 0.019826 |
| 0.000779 | NM-K_not_in_group | 0.006444 |
| 0.028813 | NM-K_not_in_group | 0.065712 |
| 0.003431 | NM-K_not_in_group | 0.000112 |
| 0.003431 | NM-K_not_in_group | 0.000112 |
| 0.004369 | NM-K_not_in_group | 0.001029 |
| 0.03973  | NM-K_not_in_group | 0.003734 |
| 0.003185 | NM-K_not_in_group | 0.018217 |
| 1        | NM-K_not_in_group | 0.160738 |
| 0.007877 | NM-K_not_in_group | 0.00729  |
| 0.006896 | NM-K_not_in_group | 0.012822 |
| 0.000509 | NM-K_not_in_group | 0.042471 |
| 0.0035   | NM-K_not_in_group | 0.002075 |
| 0.000635 | NM-K_not_in_group | 0.000758 |
| 0.000271 | NM-K_not_in_group | 0.00444  |
| 0.05466  | NM-K_not_in_group | 0.080853 |
| 0.002094 | NM-K_not_in_group | 0.001666 |
| 0.000266 | NM-K_not_in_group | 0.002075 |
| 0.003737 | NM-K_not_in_group | 0.002672 |
| 0.009903 | NM-K_not_in_group | 0.000733 |
| 0.030295 | NM-K_not_in_group | 0.056102 |
| 0.002391 | NM-K_not_in_group | 0.002441 |
| 0.001703 | NM-K_not_in_group | 0.000454 |
| 0.090561 | NM-K_not_in_group | 0.000475 |
| 0.001123 | NM-K_not_in_group | 0.000837 |
| 0.001123 | NM-K_not_in_group | 0.000837 |
| 0.001123 | NM-K_not_in_group | 0.000837 |
| 0.003613 | NM-K_not_in_group | 0.002169 |



## diffusion\_prioritization\_ALL

|          |                   |          |
|----------|-------------------|----------|
| 0.003613 | NM-K_not_in_group | 0.002169 |
| 0.002984 | NM-K_not_in_group | 0.002546 |
| 0.001917 | NM-K_not_in_group | 0.070292 |
| 0.001917 | NM-K_in_group     | 1        |
| 0.014559 | NM-K_not_in_group | 0.009955 |
| 0.135449 | NM-K_not_in_group | 0.012948 |
| 0.008119 | NM-K_in_group     | 1        |
| 0.000569 | NM-K_not_in_group | 0.0026   |
| 0.001139 | NM-K_not_in_group | 0.002921 |
| 0.000202 | NM-K_not_in_group | 0.001508 |
| 0.000154 | NM-K_not_in_group | 0.000394 |
| 1        | NM-K_not_in_group | 0.050406 |
| 1        | NM-K_not_in_group | 0.050406 |
| 0.041352 | NM-K_not_in_group | 0.050406 |
| 0.041352 | NM-K_not_in_group | 0.050406 |
| 0.041352 | NM-K_not_in_group | 0.050406 |
| 0.019808 | NM-K_not_in_group | 0.00216  |
| 1        | NM-K_not_in_group | 0.00216  |
| 0.019808 | NM-K_not_in_group | 0.00216  |
| 0.024694 | NM-K_not_in_group | 0.001867 |
| 0.001087 | NM-K_not_in_group | 0.005666 |
| 0.002698 | NM-K_not_in_group | 0.007816 |
| 0.019846 | NM-K_not_in_group | 0.001777 |
| 0.00701  | NM-K_not_in_group | 0.005121 |
| 0.011327 | NM-K_not_in_group | 0.00706  |
| 0.000418 | NM-K_not_in_group | 0.001995 |
| 0.000738 | NM-K_not_in_group | 0.00199  |
| 0.008337 | NM-K_not_in_group | 0.004321 |
| 0.008337 | NM-K_not_in_group | 0.004321 |
| 0.008337 | NM-K_not_in_group | 0.004321 |

## diffusion\_prioritization\_ALL

|          |                   |          |
|----------|-------------------|----------|
| 0.008337 | NM-K_not_in_group | 0.004321 |
| 0.000697 | NM-K_not_in_group | 0.120485 |
| 0.008831 | NM-K_not_in_group | 0.014267 |
| 0.022613 | NM-K_not_in_group | 0.033799 |
| 0.000532 | NM-K_not_in_group | 0.000159 |
| 0.003167 | NM-K_not_in_group | 0.000104 |
| 0.002036 | NM-K_not_in_group | 0.00115  |
| 0.001987 | NM-K_not_in_group | 0.001025 |
| 1        | NM-K_not_in_group | 0.550671 |
| 0.002652 | NM-K_not_in_group | 0.002471 |
| 0.024143 | NM-K_in_group     | 1        |
| 0.000147 | NM-K_not_in_group | 0.000377 |
| 0.01074  | NM-K_in_group     | 1        |
| 0.01074  | NM-K_in_group     | 1        |
| 0.001893 | NM-K_not_in_group | 0.053134 |
| 0.00574  | NM-K_not_in_group | 0.002972 |
| 0.014163 | NM-K_not_in_group | 0.005935 |
| 0.000775 | NM-K_not_in_group | 0.08555  |
| 0.073149 | NM-K_not_in_group | 0.055277 |
| 0.000009 | NM-K_not_in_group | 0.000145 |
| 0.012796 | NM-K_not_in_group | 0.067802 |
| 0.012796 | NM-K_not_in_group | 0.067802 |
| 0.001698 | NM-K_not_in_group | 0.00532  |
| 0.004712 | NM-K_not_in_group | 0.00212  |
| 0.003822 | NM-K_not_in_group | 0.001522 |
| 0.003822 | NM-K_not_in_group | 0.001522 |
| 0.005441 | NM-K_not_in_group | 0.008806 |
| 0.005441 | NM-K_not_in_group | 0.008806 |
| 0.042386 | NM-K_not_in_group | 0.000477 |
| 0.000262 | NM-K_not_in_group | 0.021653 |
| 0.016955 | NM-K_not_in_group | 0.03693  |
| 0.002824 | NM-K_not_in_group | 0.003    |
| 0.002824 | NM-K_not_in_group | 0.003    |
| 0.002824 | NM-K_not_in_group | 0.003    |

## diffusion\_prioritization\_ALL

|          |                   |          |
|----------|-------------------|----------|
| 0.002824 | NM-K_not_in_group | 0.003    |
| 0.009574 | NM-K_in_group     | 1        |
| 0.0057   | NM-K_not_in_group | 0.004091 |
| 0.003612 | NM-K_not_in_group | 0.000106 |
| 0.000285 | NM-K_not_in_group | 0.004622 |
| 0.003643 | NM-K_not_in_group | 0.004134 |
| 0.002298 | NM-K_not_in_group | 0.000649 |
| 0.005638 | NM-K_not_in_group | 0.005063 |
| 0.000512 | NM-K_not_in_group | 0.000153 |
| 0.005102 | NM-K_not_in_group | 0.024062 |
| 0.001507 | NM-K_not_in_group | 0.011439 |
| 0.00043  | NM-K_not_in_group | 0.001989 |
| 0.018574 | NM-K_not_in_group | 0.060906 |
| 0.00283  | NM-K_not_in_group | 0.003126 |
| 0.007506 | NM-K_not_in_group | 0.004006 |
| 0.005759 | NM-K_not_in_group | 0.009634 |
| 0.018719 | NM-K_not_in_group | 0.009035 |
| 0.002509 | NM-K_not_in_group | 0.00727  |
| 0.008451 | NM-K_not_in_group | 0.00676  |
| 0.061595 | NM-K_not_in_group | 0.00251  |
| 0.000503 | NM-K_not_in_group | 0.001122 |
| 0.022797 | NM-K_not_in_group | 0.001724 |
| 0.022797 | NM-K_not_in_group | 0.001724 |
| 0.022797 | NM-K_not_in_group | 0.001724 |

## diffusion\_prioritization\_ALL

|          |                   |          |
|----------|-------------------|----------|
| 1        | NM-K_not_in_group | 0.001724 |
| 0.022797 | NM-K_not_in_group | 0.001724 |
| 1        | NM-K_not_in_group | 0.001724 |
| 0.022797 | NM-K_not_in_group | 0.001724 |
| 0.022797 | NM-K_not_in_group | 0.001724 |
| 0.027244 | NM-K_not_in_group | 0.04577  |
| 0.007351 | NM-K_not_in_group | 0.014578 |
| 0.003937 | NM-K_not_in_group | 0.002028 |
| 0.006289 | NM-K_not_in_group | 0.016107 |
| 0.006289 | NM-K_not_in_group | 0.016107 |
| 0.001211 | NM-K_not_in_group | 0.001137 |
| 0.003973 | NM-K_not_in_group | 0.004606 |
| 0.001152 | NM-K_not_in_group | 0.001186 |
| 0.006512 | NM-K_not_in_group | 0.001856 |
| 0.001388 | NM-K_not_in_group | 0.022533 |
| 0.000625 | NM-K_not_in_group | 0.004485 |
| 0.031021 | NM-K_not_in_group | 0.024413 |
| 0.003741 | NM-K_not_in_group | 0.066631 |
| 0.007433 | NM-K_not_in_group | 0.004287 |
| 0.002222 | NM-K_not_in_group | 0.006543 |
| 0.000873 | NM-K_not_in_group | 0.019902 |
| 0.001172 | NM-K_not_in_group | 0.010352 |
| 0.001018 | NM-K_not_in_group | 0.002817 |
| 0.014656 | NM-K_not_in_group | 0.07817  |
| 0.029209 | NM-K_not_in_group | 0.109532 |
| 0.001233 | NM-K_not_in_group | 0.038639 |
| 1        | NM-K_not_in_group | 0.0066   |
| 0.001492 | NM-K_not_in_group | 0.004184 |
| 0.007043 | NM-K_not_in_group | 0.004126 |
| 0.0675   | NM-K_not_in_group | 0.014236 |
| 1        | NM-K_not_in_group | 0.014236 |
| 0.011707 | NM-K_not_in_group | 0.00165  |
| 0.007665 | NM-K_not_in_group | 0.030408 |
| 0.003826 | NM-K_not_in_group | 0.002249 |
| 0.000491 | NM-K_not_in_group | 0.000147 |

diffusion\_prioritization\_ALL

|          |                   |          |
|----------|-------------------|----------|
| 0.000491 | NM-K_not_in_group | 0.000147 |
| 0.008115 | NM-K_not_in_group | 0.006922 |
| 0.005961 | NM-K_not_in_group | 0.004874 |
| 0.005771 | NM-K_not_in_group | 0.008842 |
| 0.003569 | NM-K_not_in_group | 0.01775  |
| 0.010489 | NM-K_not_in_group | 0.018924 |
| 0.006058 | NM-K_not_in_group | 0.015516 |
| 0.002063 | NM-K_not_in_group | 0.014313 |
| 0.006183 | NM-K_not_in_group | 0.089423 |
| 0.001162 | NM-K_not_in_group | 0.031314 |
| 0.009235 | NM-K_not_in_group | 0.005146 |
| 0.020794 | NM-K_not_in_group | 0.019458 |
| 0.020794 | NM-K_not_in_group | 0.019458 |
| 1        | NM-K_not_in_group | 0.004647 |
| 0.008839 | NM-K_not_in_group | 0.004647 |
| 0.000034 | NM-K_not_in_group | 0.000153 |
| 0.004147 | NM-K_not_in_group | 0.145018 |
| 0.008052 | NM-K_not_in_group | 0.005133 |

## diffusion\_prioritization\_ALL

|          |                   |          |
|----------|-------------------|----------|
| 0.008052 | NM-K_not_in_group | 0.005133 |
| 0.000148 | NM-K_not_in_group | 0.000146 |
| 0.006288 | NM-K_not_in_group | 0.003922 |
| 0.033697 | NM-K_not_in_group | 0.000534 |
| 0.011852 | NM-K_not_in_group | 0.002717 |
| 0.001717 | NM-K_not_in_group | 0.003981 |
| 0.000107 | NM-K_not_in_group | 0.001019 |
| 0.001423 | NM-K_not_in_group | 0.013676 |
| 0.002287 | NM-K_not_in_group | 0.005413 |
| 0.002287 | NM-K_not_in_group | 0.005413 |
| 0.002287 | NM-K_not_in_group | 0.005413 |
| 0.007211 | NM-K_not_in_group | 0.006168 |
| 0.00143  | NM-K_not_in_group | 0.00486  |
| 0.002892 | NM-K_not_in_group | 0.023675 |
| 0.031058 | NM-K_not_in_group | 0.08479  |
| 0.000369 | NM-K_not_in_group | 0.001669 |
| 0.02588  | NM-K_not_in_group | 0.000578 |
| 0.000051 | NM-K_not_in_group | 0.006221 |
| 0.154737 | NM-K_not_in_group | 0.153443 |
| 0.007409 | NM-K_not_in_group | 0.010982 |
| 0.000251 | NM-K_not_in_group | 0.028835 |
| 0.000251 | NM-K_not_in_group | 0.028835 |
| 0.000251 | NM-K_not_in_group | 0.028835 |
| 0.024825 | NM-K_not_in_group | 0.01099  |
| 0.000863 | NM-K_not_in_group | 0.015094 |
| 0.000863 | NM-K_not_in_group | 0.015094 |
| 0.000728 | NM-K_not_in_group | 0.002888 |
| 0.004773 | NM-K_not_in_group | 0.011059 |
| 0.095175 | NM-K_not_in_group | 0.089695 |
| 0.00049  | NM-K_not_in_group | 0.000189 |
| 0.00038  | NM-K_not_in_group | 0.03635  |
| 0.002187 | NM-K_not_in_group | 0.001983 |
| 0.020602 | NM-K_not_in_group | 0.023552 |
| 0.000352 | NM-K_not_in_group | 0.000448 |
| 0.004744 | NM-K_not_in_group | 0.01099  |

### diffusion\_prioritization\_ALL

|          |                   |          |
|----------|-------------------|----------|
| 0.004744 | NM-K_in_group     | 1        |
| 0.004744 | NM-K_not_in_group | 0.01099  |
| 0.03188  | NM-K_not_in_group | 0.04399  |
| 0.002201 | NM-K_not_in_group | 0.005381 |
| 0.004793 | NM-K_not_in_group | 0.004826 |
| 0.004793 | NM-K_not_in_group | 0.004826 |
| 0.00253  | NM-K_not_in_group | 0.016204 |
| 0.00253  | NM-K_not_in_group | 0.016204 |
| 0.00253  | NM-K_not_in_group | 0.016204 |
| 0.01353  | NM-K_not_in_group | 0.072164 |
| 0.01353  | NM-K_in_group     | 1        |
| 0.01353  | NM-K_not_in_group | 0.072164 |
| 0.008694 | NM-K_not_in_group | 0.001468 |
| 0.000376 | NM-K_not_in_group | 0.16792  |
| 0.002632 | NM-K_not_in_group | 0.090361 |
| 0.000076 | NM-K_not_in_group | 0.000106 |
| 0.000076 | NM-K_not_in_group | 0.000106 |
| 0.001619 | NM-K_not_in_group | 0.00583  |
| 0.000393 | NM-K_not_in_group | 0.003106 |

diffusion\_prioritization\_ALL

|          |                   |          |
|----------|-------------------|----------|
| 0.000393 | NM-K_not_in_group | 0.003106 |
| 1        | NM-K_not_in_group | 0.239419 |
| 0.00015  | NM-K_not_in_group | 0.135892 |
| 0.028498 | NM-K_not_in_group | 0.012205 |
| 0.028498 | NM-K_not_in_group | 0.012205 |
| 0.028498 | NM-K_not_in_group | 0.012205 |
| 0.000574 | NM-K_not_in_group | 0.003035 |
| 0.000574 | NM-K_not_in_group | 0.003035 |
| 0.000574 | NM-K_not_in_group | 0.003035 |
| 0.001111 | NM-K_not_in_group | 0.03031  |
| 0.001331 | NM-K_not_in_group | 0.010637 |
| 0.001109 | NM-K_not_in_group | 0.000705 |
| 0.002369 | NM-K_not_in_group | 0.005353 |
| 0.00225  | NM-K_not_in_group | 0.004465 |
| 0.000355 | NM-K_not_in_group | 0.003319 |
| 0.016053 | NM-K_not_in_group | 0.001505 |
| 0.000016 | NM-K_not_in_group | 0.000069 |
| 0.007785 | NM-K_not_in_group | 0.015231 |
| 0.002035 | NM-K_not_in_group | 0.00172  |
| 0.001029 | NM-K_not_in_group | 0.002953 |
| 0.001029 | NM-K_not_in_group | 0.002953 |
| 0.006136 | NM-K_not_in_group | 0.012055 |
| 0.002451 | NM-K_not_in_group | 0.056997 |
| 0.003084 | NM-K_not_in_group | 0.057337 |
| 0.02212  | NM-K_not_in_group | 0.096703 |
| 0.010861 | NM-K_not_in_group | 0.141438 |
| 0.001936 | NM-K_not_in_group | 0.070688 |
| 0.000417 | NM-K_not_in_group | 0.003061 |
| 0.000417 | NM-K_not_in_group | 0.003061 |
| 0.001478 | NM-K_not_in_group | 0.003739 |
| 0.000554 | NM-K_not_in_group | 0.000122 |
| 0.015573 | NM-K_not_in_group | 0.002684 |
| 0.015573 | NM-K_not_in_group | 0.002684 |
| 0.010942 | NM-K_not_in_group | 0.002508 |
| 0.000048 | NM-K_not_in_group | 0.005786 |
| 0.001239 | NM-K_not_in_group | 0.00275  |
| 0.007967 | NM-K_not_in_group | 0.004188 |
| 0.001297 | NM-K_not_in_group | 0.003461 |



## diffusion\_prioritization\_ALL

|          |                   |          |
|----------|-------------------|----------|
| 0.000769 | NM-K_not_in_group | 0.005558 |
| 0.004795 | NM-K_not_in_group | 0.00678  |
| 0.004795 | NM-K_not_in_group | 0.00678  |
| 0.001065 | NM-K_not_in_group | 0.029716 |
| 0.002844 | NM-K_not_in_group | 0.08305  |
| 0.001243 | NM-K_not_in_group | 0.016309 |
| 0.01682  | NM-K_not_in_group | 0.032549 |
| 0.001301 | NM-K_not_in_group | 0.056729 |
| 0.00104  | NM-K_not_in_group | 0.004155 |
| 0.009657 | NM-K_not_in_group | 0.011861 |
| 0.000423 | NM-K_not_in_group | 0.011582 |
| 0.004085 | NM-K_not_in_group | 0.012914 |
| 0.137155 | NM-K_in_group     | 1        |
| 0.000464 | NM-K_not_in_group | 0.001451 |
| 0.000249 | NM-K_not_in_group | 0.000808 |
| 0.003669 | NM-K_not_in_group | 0.001313 |
| 0.03438  | NM-K_not_in_group | 0.068826 |
| 0.004685 | NM-K_not_in_group | 0.006948 |
| 0.010352 | NM-K_not_in_group | 0.155612 |
| 0.010352 | NM-K_in_group     | 1        |
| 0.001153 | NM-K_not_in_group | 0.018268 |
| 0.000387 | NM-K_not_in_group | 0.006083 |
| 0.014533 | NM-K_not_in_group | 0.002186 |
| 0.015681 | NM-K_not_in_group | 0.001756 |
| 0.000595 | NM-K_not_in_group | 0.003277 |
| 0.000902 | NM-K_not_in_group | 0.002773 |
| 0.003167 | NM-K_not_in_group | 0.002499 |
| 0.001494 | NM-K_not_in_group | 0.005382 |
| 0.000001 | NM-K_not_in_group | 0.000018 |
| 0.000001 | NM-K_not_in_group | 0.000018 |
| 0.015051 | NM-K_not_in_group | 0.002564 |
| 0.015051 | NM-K_not_in_group | 0.002564 |
| 0.005806 | NM-K_not_in_group | 0.002381 |
| 0.003882 | NM-K_not_in_group | 0.004528 |
| 0.000994 | NM-K_not_in_group | 0.028114 |
| 0.031855 | NM-K_not_in_group | 0.011513 |
| 0.018175 | NM-K_not_in_group | 0.002124 |

diffusion\_prioritization\_ALL

|          |                   |          |
|----------|-------------------|----------|
| 0.004053 | NM-K_not_in_group | 0.003069 |
| 0.01482  | NM-K_not_in_group | 0.00139  |
| 1        | NM-K_not_in_group | 0.00139  |
| 0.01482  | NM-K_not_in_group | 0.00139  |
| 0.004218 | NM-K_not_in_group | 0.001061 |
| 0.000454 | NM-K_not_in_group | 0.000526 |
| 0.001772 | NM-K_not_in_group | 0.000388 |
| 0.007017 | NM-K_not_in_group | 0.004215 |
| 1        | NM-K_not_in_group | 0.001056 |
| 0.000187 | NM-K_not_in_group | 0.002284 |

diffusion\_prioritization\_ALL

|          |                   |          |
|----------|-------------------|----------|
| 0.000187 | NM-K_not_in_group | 0.002284 |
| 0.000492 | NM-K_not_in_group | 0.001039 |
| 0.006422 | NM-K_not_in_group | 0.022013 |
| 0.004557 | NM-K_not_in_group | 0.006636 |
| 0.002356 | NM-K_not_in_group | 0.002504 |
| 0.000159 | NM-K_not_in_group | 0.003311 |
| 0.016809 | NM-K_not_in_group | 0.002225 |
| 0.020116 | NM-K_not_in_group | 0.01276  |
| 0.008396 | NM-K_not_in_group | 0.026183 |
| 0.012145 | NM-K_not_in_group | 0.003635 |
| 0.000731 | NM-K_not_in_group | 0.016415 |
| 0.00798  | NM-K_not_in_group | 0.00505  |
| 0.000232 | NM-K_not_in_group | 0.002225 |
| 0.003964 | NM-K_not_in_group | 0.000022 |
| 0.000482 | NM-K_not_in_group | 0.00138  |

## diffusion\_prioritization\_ALL

|          |                   |          |
|----------|-------------------|----------|
| 0.000482 | NM-K_not_in_group | 0.00138  |
| 0.031609 | NM-K_not_in_group | 0.001049 |
| 0.000556 | NM-K_not_in_group | 0.001791 |
| 0.008949 | NM-K_not_in_group | 0.032655 |
| 0.008307 | NM-K_not_in_group | 0.015911 |
| 0.003739 | NM-K_not_in_group | 0.011922 |
| 0.001542 | NM-K_not_in_group | 0.002001 |
| 0.007179 | NM-K_not_in_group | 0.01683  |
| 0.000892 | NM-K_not_in_group | 0.001715 |
| 0.016076 | NM-K_not_in_group | 0.002176 |
| 0.005119 | NM-K_not_in_group | 0.000169 |
| 0.005119 | NM-K_not_in_group | 0.000169 |
| 0.005119 | NM-K_not_in_group | 0.000169 |
| 0.040719 | NM-K_not_in_group | 0.161552 |
| 0.000345 | NM-K_not_in_group | 0.007731 |
| 1        | NM-K_not_in_group | 0.002201 |
| 0.003284 | NM-K_not_in_group | 0.014671 |
| 0.000792 | NM-K_not_in_group | 0.000248 |
| 0.00304  | NM-K_not_in_group | 0.007172 |
| 0.021386 | NM-K_not_in_group | 0.014534 |
| 0.001611 | NM-K_not_in_group | 0.003038 |
| 0.001167 | NM-K_not_in_group | 0.011774 |
| 0.000905 | NM-K_not_in_group | 0.003084 |
| 0.001665 | NM-K_not_in_group | 0.009872 |
| 0.001665 | NM-K_not_in_group | 0.009872 |
| 0.001665 | NM-K_not_in_group | 0.009872 |
| 0.001584 | NM-K_not_in_group | 0.010963 |
| 0.013851 | NM-K_in_group     | 1        |
| 0.011799 | NM-K_not_in_group | 0.031565 |
| 0.005789 | NM-K_not_in_group | 0.007242 |
| 0.002763 | NM-K_not_in_group | 0.088129 |
| 0.004435 | NM-K_not_in_group | 0.009887 |
| 0.004435 | NM-K_not_in_group | 0.009887 |
| 0.000035 | NM-K_not_in_group | 0.00056  |
| 0.002622 | NM-K_not_in_group | 0.142005 |
| 0.002622 | NM-K_not_in_group | 0.142005 |
| 0.002622 | NM-K_in_group     | 1        |
| 0.002622 | NM-K_not_in_group | 0.142005 |
| 0.002622 | NM-K_not_in_group | 0.142005 |
| 0.002622 | NM-K_in_group     | 1        |
| 0.002622 | NM-K_not_in_group | 0.142005 |
| 0.002622 | NM-K_not_in_group | 0.142005 |
| 0.002622 | NM-K_in_group     | 1        |
| 0.002622 | NM-K_not_in_group | 0.142005 |
| 0.002622 | NM-K_not_in_group | 0.142005 |
| 0.001129 | NM-K_not_in_group | 0.008916 |

diffusion\_prioritization\_ALL

|          |                   |          |
|----------|-------------------|----------|
| 0.000206 | NM-K_not_in_group | 0.002307 |
| 0.000206 | NM-K_not_in_group | 0.002307 |
| 0.001707 | NM-K_not_in_group | 0.013625 |
| 0.01329  | NM-K_not_in_group | 0.001079 |
| 0.000389 | NM-K_not_in_group | 0.050391 |
| 0.000389 | NM-K_not_in_group | 0.050391 |
| 0.001308 | NM-K_not_in_group | 0.036607 |
| 0.001308 | NM-K_not_in_group | 0.036607 |
| 0.001636 | NM-K_not_in_group | 0.000358 |
| 0.004632 | NM-K_not_in_group | 0.000267 |
| 0.004632 | NM-K_not_in_group | 0.000267 |
| 0.004632 | NM-K_not_in_group | 0.000267 |
| 0.0041   | NM-K_not_in_group | 0.016225 |
| 0.004093 | NM-K_not_in_group | 0.0007   |
| 0.002089 | NM-K_not_in_group | 0.001926 |
| 0.000532 | NM-K_not_in_group | 0.001478 |
| 0.002911 | NM-K_not_in_group | 0.009225 |
| 0.001656 | NM-K_not_in_group | 0.058256 |
| 0.001306 | NM-K_not_in_group | 0.300641 |
| 0.005811 | NM-K_not_in_group | 0.003253 |
| 0.0113   | NM-K_in_group     | 1        |
| 0.0113   | NM-K_not_in_group | 0.08563  |
| 0.001298 | NM-K_not_in_group | 0.021002 |
| 0.000247 | NM-K_not_in_group | 0.003427 |
| 0.000247 | NM-K_not_in_group | 0.003427 |
| 0.000247 | NM-K_not_in_group | 0.003427 |
| 0.007038 | NM-K_not_in_group | 0.000486 |
| 0.000438 | NM-K_not_in_group | 0.002604 |
| 0.002335 | NM-K_not_in_group | 0.002482 |
| 0.00507  | NM-K_not_in_group | 0.107216 |
| 0.000151 | NM-K_not_in_group | 0.003029 |
| 0.001424 | NM-K_not_in_group | 0.001847 |
| 0.001424 | NM-K_not_in_group | 0.001847 |

## diffusion\_prioritization\_ALL

|          |                   |          |
|----------|-------------------|----------|
| 0.001424 | NM-K_not_in_group | 0.001847 |
| 0.092266 | NM-K_not_in_group | 0.067769 |
| 0.008245 | NM-K_not_in_group | 0.000908 |
| 0.008245 | NM-K_not_in_group | 0.000908 |
| 0.010958 | NM-K_not_in_group | 0.006469 |
| 0.001483 | NM-K_not_in_group | 0.03253  |
| 0.009958 | NM-K_not_in_group | 0.007475 |
| 0.009958 | NM-K_not_in_group | 0.007475 |
| 0.002204 | NM-K_not_in_group | 0.002585 |
| 0.001302 | NM-K_not_in_group | 0.004687 |
| 0.009345 | NM-K_not_in_group | 0.000612 |
| 0.00576  | NM-K_not_in_group | 0.007743 |
| 0.000573 | NM-K_not_in_group | 0.029063 |
| 0.006537 | NM-K_not_in_group | 0.003841 |
| 0.014278 | NM-K_not_in_group | 0.061283 |
| 0.001291 | NM-K_not_in_group | 0.004647 |
| 0.000405 | NM-K_not_in_group | 0.000484 |
| 0.013247 | NM-K_not_in_group | 0.001123 |
| 0.013247 | NM-K_not_in_group | 0.001123 |

## diffusion\_prioritization\_ALL

|          |                   |          |
|----------|-------------------|----------|
| 0.003714 | NM-K_not_in_group | 0.008423 |
| 0.001613 | NM-K_not_in_group | 0.017701 |
| 0.000248 | NM-K_in_group     | 1        |
| 0.009052 | NM-K_not_in_group | 0.003983 |
| 0.006562 | NM-K_not_in_group | 0.003491 |
| 0.005644 | NM-K_not_in_group | 0.007586 |
| 0.005644 | NM-K_not_in_group | 0.007586 |
| 0.005644 | NM-K_not_in_group | 0.007586 |
| 0.000101 | NM-K_not_in_group | 0.000424 |
| 0.002579 | NM-K_not_in_group | 0.002574 |
| 0.004056 | NM-K_not_in_group | 0.005576 |
| 0.002307 | NM-K_not_in_group | 0.007622 |
| 0.01257  | NM-K_not_in_group | 0.001223 |
| 0.001776 | NM-K_not_in_group | 0.001008 |
| 0.010859 | NM-K_not_in_group | 0.001202 |
| 0.001217 | NM-K_not_in_group | 0.046744 |
| 0.007056 | NM-K_in_group     | 1        |
| 0.001841 | NM-K_not_in_group | 0.004968 |
| 0.02087  | NM-K_not_in_group | 0.000507 |
| 0.005365 | NM-K_not_in_group | 0.003003 |
| 0.005365 | NM-K_not_in_group | 0.003003 |
| 0.005365 | NM-K_not_in_group | 0.003003 |
| 0.00261  | NM-K_not_in_group | 0.049607 |
| 0.001493 | NM-K_not_in_group | 0.038167 |
| 0.001493 | NM-K_not_in_group | 0.038167 |
| 0.000775 | NM-K_not_in_group | 0.02872  |
| 0.001726 | NM-K_not_in_group | 0.018638 |
| 0.00112  | NM-K_not_in_group | 0.003917 |
| 0.034426 | NM-K_not_in_group | 0.086236 |
| 0.002832 | NM-K_not_in_group | 0.000607 |
| 0.002832 | NM-K_not_in_group | 0.000607 |

## diffusion\_prioritization\_ALL

|          |                   |          |
|----------|-------------------|----------|
| 0.002832 | NM-K_not_in_group | 0.000607 |
| 0.00124  | NM-K_not_in_group | 0.001808 |
| 0.000924 | NM-K_not_in_group | 0.002136 |
| 0.000806 | NM-K_not_in_group | 0.03501  |
| 0.00064  | NM-K_not_in_group | 0.001742 |
| 0.002022 | NM-K_not_in_group | 0.000066 |
| 0.002022 | NM-K_not_in_group | 0.000066 |
| 0.001184 | NM-K_not_in_group | 0.015522 |
| 0.001522 | NM-K_not_in_group | 0.006541 |
| 0.010484 | NM-K_not_in_group | 0.002259 |
| 0.000216 | NM-K_not_in_group | 0.002223 |
| 0.004851 | NM-K_not_in_group | 0.006388 |
| 0.004851 | NM-K_not_in_group | 0.006388 |
| 0.004851 | NM-K_not_in_group | 0.006388 |
| 0.002153 | NM-K_not_in_group | 0.000792 |
| 0.005113 | NM-K_not_in_group | 0.003737 |
| 0.001433 | NM-K_not_in_group | 0.011171 |
| 0.0017   | NM-K_not_in_group | 0.013001 |



## diffusion\_prioritization\_ALL

|          |                   |          |
|----------|-------------------|----------|
| 0.0017   | NM-K_not_in_group | 0.013001 |
| 0.001283 | NM-K_not_in_group | 0.001665 |
| 0.002264 | NM-K_not_in_group | 0.122628 |
| 0.006194 | NM-K_not_in_group | 0.00046  |
| 0.003533 | NM-K_in_group     | 1        |
| 0.00013  | NM-K_not_in_group | 0.006371 |
| 0.00521  | NM-K_not_in_group | 0.007003 |
| 0.003841 | NM-K_not_in_group | 0.086702 |
| 0.003468 | NM-K_not_in_group | 0.008744 |
| 0.003468 | NM-K_not_in_group | 0.008744 |
| 0.003468 | NM-K_not_in_group | 0.008744 |
| 0.008327 | NM-K_not_in_group | 0.223653 |
| 0.000395 | NM-K_not_in_group | 0.000143 |
| 0.000727 | NM-K_not_in_group | 0.085618 |
| 0.009416 | NM-K_not_in_group | 0.041156 |
| 0.004928 | NM-K_not_in_group | 0.006242 |
| 0.003033 | NM-K_not_in_group | 0.0007   |
| 0.003033 | NM-K_not_in_group | 0.0007   |
| 0.003033 | NM-K_not_in_group | 0.0007   |
| 0.000399 | NM-K_not_in_group | 0.002095 |
| 0.002382 | NM-K_not_in_group | 0.00075  |
| 0.002382 | NM-K_not_in_group | 0.00075  |
| 0.005105 | NM-K_not_in_group | 0.00144  |
| 0.001458 | NM-K_not_in_group | 0.015709 |
| 0.004312 | NM-K_not_in_group | 0.001152 |
| 0.00016  | NM-K_not_in_group | 0.002057 |
| 0.008551 | NM-K_not_in_group | 0.002182 |
| 0.005095 | NM-K_not_in_group | 0.0016   |
| 0.014551 | NM-K_not_in_group | 0.0011   |
| 0.011578 | NM-K_not_in_group | 0.002002 |
| 0.005312 | NM-K_not_in_group | 0.006632 |
| 0.005312 | NM-K_not_in_group | 0.006632 |
| 0.002196 | NM-K_not_in_group | 0.000724 |
| 0.002033 | NM-K_not_in_group | 0.004287 |
| 0.069341 | NM-K_not_in_group | 0.000024 |

## diffusion\_prioritization\_ALL

|          |                   |          |
|----------|-------------------|----------|
| 0.069341 | NM-K_not_in_group | 0.000024 |
| 0.000487 | NM-K_not_in_group | 0.023177 |
| 1        | NM-K_not_in_group | 0.000221 |
| 0.010936 | NM-K_not_in_group | 0.001699 |
| 0.016407 | NM-K_not_in_group | 0.000057 |
| 0.000435 | NM-K_not_in_group | 0.001173 |
| 0.002316 | NM-K_not_in_group | 0.002338 |
| 0.005019 | NM-K_not_in_group | 0.006746 |
| 0.001186 | NM-K_not_in_group | 0.029943 |
| 0.012705 | NM-K_not_in_group | 0.000373 |
| 0.011611 | NM-K_not_in_group | 0.001189 |
| 0.003336 | NM-K_not_in_group | 0.008411 |
| 0.06817  | NM-K_not_in_group | 0.063565 |
| 0.000313 | NM-K_not_in_group | 0.000094 |
| 0.000591 | NM-K_not_in_group | 0.001608 |
| 0.011146 | NM-K_not_in_group | 0.132749 |
| 0.000208 | NM-K_not_in_group | 0.002882 |
| 0.001541 | NM-K_not_in_group | 0.011697 |
| 0.004457 | NM-K_not_in_group | 0.101647 |
| 0.011854 | NM-K_not_in_group | 0.037481 |
| 0.045097 | NM-K_not_in_group | 0.002869 |
| 0.014993 | NM-K_not_in_group | 0.088592 |
| 0.019372 | NM-K_not_in_group | 0.00089  |
| 1        | NM-K_not_in_group | 0.00089  |
| 0.019372 | NM-K_not_in_group | 0.00089  |
| 0.003867 | NM-K_not_in_group | 0.009904 |
| 0.00061  | NM-K_not_in_group | 0.000428 |
| 1        | NM-K_not_in_group | 0.024557 |
| 0.005642 | NM-K_not_in_group | 0.153414 |
| 0.005129 | NM-K_not_in_group | 0.034568 |

## diffusion\_prioritization\_ALL

|          |                   |          |
|----------|-------------------|----------|
| 0.00064  | NM-K_not_in_group | 0.001566 |
| 0.002353 | NM-K_not_in_group | 0.003606 |
| 0.000368 | NM-K_not_in_group | 0.039603 |
| 0.000428 | NM-K_not_in_group | 0.001215 |
| 0.004452 | NM-K_not_in_group | 0.005882 |
| 0.003197 | NM-K_not_in_group | 0.001585 |
| 0.005458 | NM-K_not_in_group | 0.004532 |
| 0.000199 | NM-K_not_in_group | 0.002176 |
| 0.010874 | NM-K_not_in_group | 0.00102  |
| 0.001962 | NM-K_not_in_group | 0.023073 |
| 0.002857 | NM-K_not_in_group | 0.002002 |
| 0.001908 | NM-K_not_in_group | 0.003588 |
| 0.017876 | NM-K_not_in_group | 0.004831 |
| 0.003861 | NM-K_not_in_group | 0.000286 |
| 0.010818 | NM-K_not_in_group | 0.001624 |
| 0.002201 | NM-K_not_in_group | 0.00129  |
| 0.00218  | NM-K_not_in_group | 0.002951 |
| 0.040618 | NM-K_not_in_group | 0.000269 |
| 1        | NM-K_not_in_group | 0.000269 |
| 0.000953 | NM-K_not_in_group | 0.016153 |
| 0.002158 | NM-K_not_in_group | 0.002257 |
| 0.027255 | NM-K_not_in_group | 0.000206 |
| 0.001861 | NM-K_not_in_group | 0.002109 |
| 0.001407 | NM-K_not_in_group | 0.001621 |
| 0.001276 | NM-K_not_in_group | 0.005082 |
| 0.016762 | NM-K_not_in_group | 0.018534 |
| 0.003662 | NM-K_not_in_group | 0.011756 |
| 0.000225 | NM-K_not_in_group | 0.000286 |
| 0.00303  | NM-K_not_in_group | 0.002082 |

## diffusion\_prioritization\_ALL

|          |                   |          |
|----------|-------------------|----------|
| 0.00303  | NM-K_not_in_group | 0.002082 |
| 0.00303  | NM-K_not_in_group | 0.002082 |
| 0.00303  | NM-K_not_in_group | 0.002082 |
| 0.002051 | NM-K_not_in_group | 0.002343 |
| 0.008636 | NM-K_not_in_group | 0.046062 |
| 0.003243 | NM-K_not_in_group | 0.063081 |
| 0.00333  | NM-K_not_in_group | 0.002325 |
| 0.003344 | NM-K_not_in_group | 0.003686 |
| 0.066172 | NM-K_not_in_group | 0.01385  |
| 0.001266 | NM-K_not_in_group | 0.020724 |
| 0.004083 | NM-K_not_in_group | 0.005405 |
| 0.000403 | NM-K_not_in_group | 0.001815 |
| 0.000528 | NM-K_not_in_group | 0.002404 |
| 0.000476 | NM-K_not_in_group | 0.000022 |
| 0.000476 | NM-K_not_in_group | 0.000022 |
| 0.000476 | NM-K_not_in_group | 0.000022 |
| 0.044999 | NM-K_not_in_group | 0.025489 |
| 0.044999 | NM-K_not_in_group | 0.025489 |
| 0.000335 | NM-K_not_in_group | 0.107139 |
| 0.003701 | NM-K_not_in_group | 0.000274 |
| 0.004111 | NM-K_not_in_group | 0.093752 |
| 0.004111 | NM-K_not_in_group | 0.093752 |
| 0.000939 | NM-K_not_in_group | 0.038777 |
| 0.000354 | NM-K_not_in_group | 0.032027 |
| 0.018475 | NM-K_not_in_group | 0.039399 |
| 0.004846 | NM-K_not_in_group | 0.007596 |
| 0.002943 | NM-K_not_in_group | 0.00162  |

## diffusion\_prioritization\_ALL

|          |                   |          |
|----------|-------------------|----------|
| 0.002943 | NM-K_not_in_group | 0.00162  |
| 0.001413 | NM-K_not_in_group | 0.010838 |
| 0.002078 | NM-K_not_in_group | 0.002074 |
| 0.004566 | NM-K_not_in_group | 0.023722 |
| 0.054702 | NM-K_in_group     | 1        |
| 0.054702 | NM-K_not_in_group | 0.061093 |
| 0.054702 | NM-K_not_in_group | 0.061093 |
| 1        | NM-K_not_in_group | 0.061093 |
| 0.000104 | NM-K_not_in_group | 0.000774 |
| 0.001704 | NM-K_not_in_group | 0.002176 |
| 0.004005 | NM-K_not_in_group | 0.006011 |
| 0.002951 | NM-K_not_in_group | 0.001464 |



diffusion\_prioritization\_ALL

|          |                   |          |
|----------|-------------------|----------|
| 0.000337 | NM-K_not_in_group | 0.001494 |
| 0.006984 | NM-K_not_in_group | 0.001601 |
| 0.00033  | NM-K_not_in_group | 0.011749 |
| 0.0001   | NM-K_in_group     | 1        |
| 0.002851 | NM-K_not_in_group | 0.17928  |
| 0.000543 | NM-K_not_in_group | 0.005901 |
| 0.002225 | NM-K_not_in_group | 0.000899 |
| 0.002225 | NM-K_not_in_group | 0.000899 |
| 0.0026   | NM-K_not_in_group | 0.001834 |
| 0.0026   | NM-K_not_in_group | 0.001834 |
| 0.0026   | NM-K_not_in_group | 0.001834 |
| 0.002689 | NM-K_not_in_group | 0.006822 |
| 0.002689 | NM-K_not_in_group | 0.006822 |
| 0.000851 | NM-K_not_in_group | 0.048241 |
| 0.002209 | NM-K_not_in_group | 0.000892 |
| 0.002322 | NM-K_not_in_group | 0.10445  |
| 0.000447 | NM-K_not_in_group | 0.002685 |
| 0.001684 | NM-K_not_in_group | 0.000999 |
| 0.000201 | NM-K_not_in_group | 0.001908 |
| 0.000201 | NM-K_not_in_group | 0.001908 |
| 0.128421 | NM-K_in_group     | 1        |
| 0.005047 | NM-K_not_in_group | 0.002653 |
| 0.000382 | NM-K_not_in_group | 0.001837 |
| 0.003656 | NM-K_not_in_group | 0.003793 |
| 0.000574 | NM-K_not_in_group | 0.006083 |
| 0.000618 | NM-K_not_in_group | 0.010486 |
| 0.000618 | NM-K_in_group     | 1        |
| 0.000618 | NM-K_not_in_group | 0.010486 |

## diffusion\_prioritization\_ALL

|          |                   |          |
|----------|-------------------|----------|
| 0.000618 | NM-K_not_in_group | 0.010486 |
| 1        | NM-K_not_in_group | 0.12319  |
| 0.017448 | NM-K_not_in_group | 0.001278 |
| 0.000119 | NM-K_not_in_group | 0.001788 |
| 0.000347 | NM-K_in_group     | 1        |
| 0.000347 | NM-K_not_in_group | 0.020516 |
| 0.000347 | NM-K_not_in_group | 0.020516 |
| 0.000128 | NM-K_not_in_group | 0.000998 |
| 0.001798 | NM-K_not_in_group | 0.001286 |
| 0.007402 | NM-K_not_in_group | 0.010661 |
| 0.002854 | NM-K_not_in_group | 0.001964 |
| 0.000333 | NM-K_not_in_group | 0.013873 |
| 0.000374 | NM-K_not_in_group | 0.001688 |



## diffusion\_prioritization\_ALL

|          |                   |          |
|----------|-------------------|----------|
| 0.000374 | NM-K_not_in_group | 0.001688 |
| 0.002784 | NM-K_not_in_group | 0.001603 |
| 0.000025 | NM-K_not_in_group | 0.000395 |
| 0.002058 | NM-K_not_in_group | 0.004804 |
| 0.000954 | NM-K_not_in_group | 0.003435 |
| 0.002608 | NM-K_not_in_group | 0.006646 |
| 0.001549 | NM-K_not_in_group | 0.02104  |
| 0.008644 | NM-K_not_in_group | 0.007712 |
| 0.01628  | NM-K_not_in_group | 0.027572 |
| 0.01628  | NM-K_not_in_group | 0.027572 |
| 0.01628  | NM-K_not_in_group | 0.027572 |
| 0.003596 | NM-K_not_in_group | 0.023859 |
| 0.000378 | NM-K_not_in_group | 0.000403 |
| 0.021578 | NM-K_not_in_group | 0.000726 |
| 0.009459 | NM-K_not_in_group | 0.000887 |
| 0.085157 | NM-K_not_in_group | 0.177762 |
| 0.004133 | NM-K_not_in_group | 0.03343  |
| 0.001298 | NM-K_not_in_group | 0.003761 |
| 0.001298 | NM-K_not_in_group | 0.003761 |
| 0.000353 | NM-K_not_in_group | 0.00331  |
| 0.000567 | NM-K_not_in_group | 0.019052 |
| 0.001912 | NM-K_not_in_group | 0.000953 |
| 0.000317 | NM-K_not_in_group | 0.00819  |
| 0.00055  | NM-K_not_in_group | 0.019493 |
| 0.001856 | NM-K_not_in_group | 0.002191 |
| 0.001429 | NM-K_not_in_group | 0.000618 |
| 0.001429 | NM-K_not_in_group | 0.000618 |
| 0.002774 | NM-K_not_in_group | 0.005082 |
| 0.002731 | NM-K_not_in_group | 0.001884 |
| 0.099242 | NM-K_not_in_group | 0.001262 |
| 0.001034 | NM-K_not_in_group | 0.001214 |

## diffusion\_prioritization\_ALL

|          |                   |          |
|----------|-------------------|----------|
| 0.001034 | NM-K_not_in_group | 0.001214 |
| 0.004026 | NM-K_not_in_group | 0.005406 |
| 0.042342 | NM-K_not_in_group | 0.000566 |
| 0.001155 | NM-K_not_in_group | 0.001171 |
| 0.002948 | NM-K_in_group     | 1        |
| 0.000781 | NM-K_not_in_group | 0.012894 |
| 0.000597 | NM-K_not_in_group | 0.000566 |
| 0.004073 | NM-K_not_in_group | 0.053215 |
| 0.003184 | NM-K_not_in_group | 0.032769 |
| 0.003184 | NM-K_not_in_group | 0.032769 |
| 0.003184 | NM-K_in_group     | 1        |
| 0.003184 | NM-K_not_in_group | 0.032769 |
| 0.003184 | NM-K_not_in_group | 0.032769 |
| 0.003184 | NM-K_not_in_group | 0.032769 |
| 0.002746 | NM-K_not_in_group | 0.002434 |
| 0.002586 | NM-K_not_in_group | 0.00167  |
| 0.0013   | NM-K_not_in_group | 0.003266 |
| 0.0013   | NM-K_not_in_group | 0.003266 |
| 0.0013   | NM-K_not_in_group | 0.003266 |
| 0.003124 | NM-K_not_in_group | 0.001998 |
| 0.013419 | NM-K_not_in_group | 0.003019 |
| 0.000499 | NM-K_not_in_group | 0.001486 |
| 0.002083 | NM-K_not_in_group | 0.000469 |
| 0.000432 | NM-K_not_in_group | 0.001313 |
| 0.004657 | NM-K_not_in_group | 0.004325 |
| 0.00279  | NM-K_not_in_group | 0.050121 |
| 0.00138  | NM-K_not_in_group | 0.009057 |
| 0.015126 | NM-K_not_in_group | 0.00251  |
| 0.004363 | NM-K_not_in_group | 0.013636 |
| 0.004363 | NM-K_not_in_group | 0.013636 |
| 0.004363 | NM-K_not_in_group | 0.013636 |
| 0.002742 | NM-K_not_in_group | 0.001968 |
| 0.000299 | NM-K_not_in_group | 0.006785 |
| 0.004967 | NM-K_not_in_group | 0.016483 |
| 0.035949 | NM-K_in_group     | 1        |
| 0.010825 | NM-K_not_in_group | 0.090173 |
| 0.010825 | NM-K_not_in_group | 0.090173 |
| 0.009378 | NM-K_not_in_group | 0.005269 |
| 0.129122 | NM-K_in_group     | 1        |
| 0.003144 | NM-K_in_group     | 1        |
| 0.007371 | NM-K_not_in_group | 0.008171 |
| 0.003097 | NM-K_not_in_group | 0.119917 |
| 0.000869 | NM-K_not_in_group | 0.001149 |
| 0.002438 | NM-K_not_in_group | 0.027746 |

diffusion\_prioritization\_ALL

|          |                   |          |
|----------|-------------------|----------|
| 0.002438 | NM-K_not_in_group | 0.027746 |
| 0.002438 | NM-K_not_in_group | 0.027746 |
| 0.002438 | NM-K_in_group     | 1        |
| 0.002171 | NM-K_not_in_group | 0.001643 |
| 0.002616 | NM-K_not_in_group | 0.004206 |
| 0.000647 | NM-K_not_in_group | 0.000505 |
| 0.008251 | NM-K_not_in_group | 0.028399 |
| 0.001044 | NM-K_not_in_group | 0.000229 |
| 0.000474 | NM-K_not_in_group | 0.052494 |
| 0.003537 | NM-K_not_in_group | 0.007014 |
| 0.003239 | NM-K_not_in_group | 0.005025 |
| 0.003347 | NM-K_not_in_group | 0.037955 |
| 0.000821 | NM-K_not_in_group | 0.001927 |
| 0.003133 | NM-K_not_in_group | 0.000893 |
| 0.000725 | NM-K_not_in_group | 0.158052 |
| 0.000403 | NM-K_not_in_group | 0.017011 |
| 0.001327 | NM-K_not_in_group | 0.007591 |
| 0.001327 | NM-K_not_in_group | 0.007591 |
| 0.002784 | NM-K_not_in_group | 0.118637 |
| 0.002158 | NM-K_not_in_group | 0.002705 |
| 0.002868 | NM-K_not_in_group | 0.005724 |
| 0.078058 | NM-K_in_group     | 1        |
| 0.000332 | NM-K_not_in_group | 0.008262 |
| 0.005633 | NM-K_not_in_group | 0.000794 |
| 0.012738 | NM-K_not_in_group | 0.058019 |
| 0.012738 | NM-K_in_group     | 1        |
| 0.012738 | NM-K_not_in_group | 0.058019 |
| 1        | NM-K_not_in_group | 0.058019 |
| 0.012738 | NM-K_not_in_group | 0.058019 |
| 1        | NM-K_not_in_group | 0.058019 |
| 0.012738 | NM-K_in_group     | 1        |
| 0.012738 | NM-K_not_in_group | 0.058019 |

## diffusion\_prioritization\_ALL

|          |                   |          |
|----------|-------------------|----------|
| 0.012738 | NM-K_not_in_group | 0.058019 |
| 0.012738 | NM-K_not_in_group | 0.058019 |
| 0.012738 | NM-K_not_in_group | 0.058019 |
| 0.012738 | NM-K_in_group     | 1        |
| 0.012738 | NM-K_not_in_group | 0.058019 |
| 0.035591 | NM-K_not_in_group | 0.008858 |
| 0.000909 | NM-K_not_in_group | 0.001179 |
| 0.034473 | NM-K_in_group     | 1        |
| 0.034473 | NM-K_in_group     | 1        |
| 0.034473 | NM-K_in_group     | 1        |
| 0.008544 | NM-K_not_in_group | 0.003763 |
| 0.0179   | NM-K_not_in_group | 0.095773 |
| 0.003857 | NM-K_not_in_group | 0.044545 |
| 0.000821 | NM-K_not_in_group | 0.008394 |
| 0.020663 | NM-K_not_in_group | 0.00047  |
| 0.01194  | NM-K_not_in_group | 0.087568 |
| 0.000085 | NM-K_not_in_group | 0.000632 |
| 0.014121 | NM-K_not_in_group | 0.009765 |
| 0.000742 | NM-K_not_in_group | 0.015979 |
| 0.008831 | NM-K_not_in_group | 0.005554 |
| 0.000864 | NM-K_not_in_group | 0.000446 |
| 0.002669 | NM-K_not_in_group | 0.004574 |
| 0.000064 | NM-K_not_in_group | 0.000164 |
| 0.000064 | NM-K_not_in_group | 0.000164 |
| 0.000064 | NM-K_not_in_group | 0.000164 |
| 0.000816 | NM-K_not_in_group | 0.004939 |
| 0.01998  | NM-K_not_in_group | 0.000543 |
| 0.046878 | NM-K_in_group     | 1        |
| 0.0004   | NM-K_not_in_group | 0.001298 |
| 0.014895 | NM-K_not_in_group | 0.050447 |
| 0.010819 | NM-K_not_in_group | 0.055606 |
| 0.000573 | NM-K_in_group     | 1        |
| 0.000025 | NM-K_not_in_group | 0.002993 |
| 0.000025 | NM-K_not_in_group | 0.002993 |
| 0.000696 | NM-K_not_in_group | 0.001773 |
| 0.001219 | NM-K_not_in_group | 0.000505 |
| 0.001713 | NM-K_not_in_group | 0.000788 |

## diffusion\_prioritization\_ALL

|          |                   |          |
|----------|-------------------|----------|
| 0.001499 | NM-K_not_in_group | 0.008883 |
| 0.01545  | NM-K_not_in_group | 0.001452 |
| 0.000794 | NM-K_not_in_group | 0.002858 |
| 0.000976 | NM-K_not_in_group | 0.028076 |
| 0.001978 | NM-K_not_in_group | 0.004169 |
| 0.021059 | NM-K_not_in_group | 0.004201 |
| 0.021059 | NM-K_not_in_group | 0.004201 |
| 0.021059 | NM-K_not_in_group | 0.004201 |
| 0.023302 | NM-K_not_in_group | 0.10183  |
| 0.000236 | NM-K_not_in_group | 0.000091 |
| 0.000306 | NM-K_not_in_group | 0.001604 |
| 0.000306 | NM-K_not_in_group | 0.001604 |
| 0.000967 | NM-K_not_in_group | 0.034055 |
| 0.00257  | NM-K_not_in_group | 0.109522 |
| 0.00257  | NM-K_in_group     | 1        |
| 0.00257  | NM-K_not_in_group | 0.109522 |
| 0.00257  | NM-K_not_in_group | 0.109522 |
| 0.002502 | NM-K_not_in_group | 0.005199 |
| 0.00215  | NM-K_not_in_group | 0.001862 |
| 0.012211 | NM-K_not_in_group | 0.001661 |
| 0.003424 | NM-K_not_in_group | 0.001917 |
| 0.001059 | NM-K_not_in_group | 0.002589 |
| 0.000487 | NM-K_not_in_group | 0.001534 |
| 0.019979 | NM-K_not_in_group | 0.070028 |
| 0.019979 | NM-K_not_in_group | 0.070028 |
| 0.019979 | NM-K_not_in_group | 0.070028 |
| 0.005871 | NM-K_not_in_group | 0.005987 |
| 0.001144 | NM-K_not_in_group | 0.002669 |
| 0.009868 | NM-K_not_in_group | 0.004549 |
| 0.00453  | NM-K_not_in_group | 0.01573  |
| 0.01267  | NM-K_not_in_group | 0.045889 |
| 0.001016 | NM-K_not_in_group | 0.001873 |
| 0.001242 | NM-K_not_in_group | 0.000577 |
| 0.00045  | NM-K_not_in_group | 0.001285 |
| 0.004236 | NM-K_not_in_group | 0.000518 |
| 0.00107  | NM-K_not_in_group | 0.001912 |
| 0.000008 | NM-K_not_in_group | 0.000033 |
| 0.000008 | NM-K_not_in_group | 0.000033 |
| 0.000278 | NM-K_not_in_group | 0.00132  |
| 0.000509 | NM-K_not_in_group | 0.001781 |
| 0.000509 | NM-K_not_in_group | 0.001781 |
| 0.000509 | NM-K_not_in_group | 0.001781 |

diffusion\_prioritization\_ALL

|          |                   |          |
|----------|-------------------|----------|
| 0.000509 | NM-K_not_in_group | 0.001781 |
| 0.014806 | NM-K_not_in_group | 0.001392 |
| 0.002298 | NM-K_not_in_group | 0.001146 |
| 0.000213 | NM-K_not_in_group | 0.000064 |
| 0.000213 | NM-K_not_in_group | 0.000064 |
| 0.000213 | NM-K_not_in_group | 0.000064 |
| 0.000798 | NM-K_not_in_group | 0.000411 |
| 0.000179 | NM-K_not_in_group | 0.002803 |
| 0.000299 | NM-K_not_in_group | 0.001402 |
| 0.000813 | NM-K_not_in_group | 0.001055 |
| 0.00021  | NM-K_not_in_group | 0.000468 |
| 0.00021  | NM-K_not_in_group | 0.000468 |
| 0.00021  | NM-K_not_in_group | 0.000468 |
| 0.00059  | NM-K_not_in_group | 0.00812  |
| 0.000792 | NM-K_not_in_group | 0.001662 |
| 0.002218 | NM-K_not_in_group | 0.0011   |
| 0.000367 | NM-K_not_in_group | 0.032567 |
| 0.130156 | NM-K_not_in_group | 0.058789 |
| 0.002565 | NM-K_not_in_group | 0.003794 |
| 0.001157 | NM-K_not_in_group | 0.005503 |
| 0.001157 | NM-K_not_in_group | 0.005503 |
| 0.001157 | NM-K_not_in_group | 0.005503 |
| 1        | NM-K_not_in_group | 0.165576 |
| 0.00416  | NM-K_not_in_group | 0.011201 |
| 0.004737 | NM-K_not_in_group | 0.012833 |
| 0.012171 | NM-K_not_in_group | 0.045638 |
| 0.003026 | NM-K_not_in_group | 0.129717 |
| 0.003026 | NM-K_not_in_group | 0.129717 |
| 0.000189 | NM-K_not_in_group | 0.135261 |
| 0.003303 | NM-K_in_group     | 1        |
| 0.003303 | NM-K_not_in_group | 0.029516 |
| 0.003303 | NM-K_in_group     | 1        |
| 0.003303 | NM-K_not_in_group | 0.029516 |
| 0.003303 | NM-K_not_in_group | 0.029516 |
| 0.000425 | NM-K_not_in_group | 0.003984 |

## diffusion\_prioritization\_ALL

|          |                   |          |
|----------|-------------------|----------|
| 0.011    | NM-K_in_group     | 1        |
| 0.001392 | NM-K_not_in_group | 0.075401 |
| 0.000275 | NM-K_not_in_group | 0.000178 |
| 0.002024 | NM-K_not_in_group | 0.003669 |
| 0.001242 | NM-K_not_in_group | 0.014809 |
| 0.001242 | NM-K_not_in_group | 0.014809 |
| 0.004222 | NM-K_not_in_group | 0.002631 |
| 0.00245  | NM-K_not_in_group | 0.001926 |
| 0.001092 | NM-K_not_in_group | 0.001882 |
| 0.003204 | NM-K_not_in_group | 0.004306 |
| 0.006847 | NM-K_not_in_group | 0.013286 |
| 0.002165 | NM-K_not_in_group | 0.001419 |
| 0.001543 | NM-K_not_in_group | 0.001672 |
| 0.000419 | NM-K_not_in_group | 0.00551  |
| 0.000477 | NM-K_not_in_group | 0.00167  |
| 0.000377 | NM-K_not_in_group | 0.001027 |
| 0.004182 | NM-K_not_in_group | 0.014522 |
| 0.004182 | NM-K_in_group     | 1        |
| 0.004182 | NM-K_not_in_group | 0.014522 |
| 0.004182 | NM-K_not_in_group | 0.014522 |
| 0.004182 | NM-K_not_in_group | 0.014522 |
| 0.002456 | NM-K_not_in_group | 0.008183 |
| 0.002456 | NM-K_not_in_group | 0.008183 |
| 0.053003 | NM-K_not_in_group | 0.019878 |
| 0.001127 | NM-K_not_in_group | 0.016005 |
| 0.006385 | NM-K_not_in_group | 0.008296 |
| 0.002245 | NM-K_not_in_group | 0.013999 |
| 0.002349 | NM-K_not_in_group | 0.005097 |
| 0.000421 | NM-K_not_in_group | 0.006496 |
| 0.000421 | NM-K_not_in_group | 0.006496 |

## diffusion\_prioritization\_ALL

|          |                   |          |
|----------|-------------------|----------|
| 0.000421 | NM-K_not_in_group | 0.006496 |
| 0.000449 | NM-K_not_in_group | 0.007074 |
| 0.001052 | NM-K_not_in_group | 0.001813 |
| 0.002492 | NM-K_not_in_group | 0.002395 |
| 0.000633 | NM-K_not_in_group | 0.001983 |
| 0.000633 | NM-K_not_in_group | 0.001983 |
| 0.000633 | NM-K_not_in_group | 0.001983 |
| 0.001756 | NM-K_not_in_group | 0.00079  |
| 0.121068 | NM-K_in_group     | 1        |
| 0.000065 | NM-K_not_in_group | 0.007222 |
| 0.000788 | NM-K_not_in_group | 0.006876 |
| 0.000656 | NM-K_not_in_group | 0.008922 |
| 0.002646 | NM-K_not_in_group | 0.02201  |
| 0.002646 | NM-K_not_in_group | 0.02201  |
| 0.001065 | NM-K_not_in_group | 0.000551 |
| 0.000765 | NM-K_not_in_group | 0.001002 |
| 0.003696 | NM-K_not_in_group | 0.014378 |
| 0.000925 | NM-K_not_in_group | 0.005294 |
| 0.002928 | NM-K_not_in_group | 0.002974 |
| 0.000964 | NM-K_not_in_group | 0.005878 |
| 0.001563 | NM-K_not_in_group | 0.003872 |
| 0.002146 | NM-K_not_in_group | 0.00359  |
| 0.000409 | NM-K_not_in_group | 0.006449 |
| 0.006273 | NM-K_not_in_group | 0.004939 |
| 0.00158  | NM-K_not_in_group | 0.007058 |
| 0.001462 | NM-K_not_in_group | 0.003451 |
| 0.001564 | NM-K_not_in_group | 0.002971 |
| 0.115025 | NM-K_not_in_group | 0.045989 |
| 0.000669 | NM-K_not_in_group | 0.004049 |
| 0.001794 | NM-K_not_in_group | 0.001856 |



diffusion\_prioritization\_ALL

|          |                   |          |
|----------|-------------------|----------|
| 0.001794 | NM-K_not_in_group | 0.001856 |
| 0.002302 | NM-K_not_in_group | 0.00322  |
| 0.033688 | NM-K_not_in_group | 0.010557 |
| 0.001147 | NM-K_not_in_group | 0.002841 |
| 0.001595 | NM-K_not_in_group | 0.001467 |
| 0.001595 | NM-K_not_in_group | 0.001467 |
| 0.002384 | NM-K_not_in_group | 0.007063 |
| 0.002348 | NM-K_not_in_group | 0.004056 |
| 0.001102 | NM-K_not_in_group | 0.007181 |
| 0.002138 | NM-K_not_in_group | 0.033687 |
| 0.00153  | NM-K_not_in_group | 0.009918 |
| 0.00153  | NM-K_not_in_group | 0.009918 |
| 0.008111 | NM-K_not_in_group | 0.009322 |
| 0.000059 | NM-K_not_in_group | 0.000956 |
| 0.002426 | NM-K_not_in_group | 0.010398 |
| 0.007826 | NM-K_not_in_group | 0.001969 |
| 0.001913 | NM-K_not_in_group | 0.022722 |
| 0.002279 | NM-K_not_in_group | 0.005836 |
| 0.002821 | NM-K_not_in_group | 0.001481 |
| 0.000388 | NM-K_not_in_group | 0.005997 |
| 0.000388 | NM-K_in_group     | 1        |
| 0.000388 | NM-K_not_in_group | 0.005997 |

## diffusion\_prioritization\_ALL

|          |                   |          |
|----------|-------------------|----------|
| 0.000388 | NM-K_not_in_group | 0.005997 |
| 0.002291 | NM-K_not_in_group | 0.006758 |
| 0.006596 | NM-K_not_in_group | 0.00116  |
| 0.000153 | NM-K_not_in_group | 0.059569 |
| 0.000648 | NM-K_not_in_group | 0.018189 |
| 0.008318 | NM-K_not_in_group | 0.03949  |
| 0.001884 | NM-K_not_in_group | 0.000934 |
| 0.002454 | NM-K_in_group     | 1        |
| 0.006032 | NM-K_in_group     | 1        |
| 0.006032 | NM-K_not_in_group | 0.02041  |
| 0.000644 | NM-K_not_in_group | 0.018076 |
| 0.000644 | NM-K_not_in_group | 0.018076 |
| 0.000644 | NM-K_not_in_group | 0.018076 |
| 0.000281 | NM-K_not_in_group | 0.129699 |
| 0.00123  | NM-K_not_in_group | 0.01376  |
| 0.086796 | NM-K_not_in_group | 0.164831 |
| 0.086796 | NM-K_not_in_group | 0.164831 |
| 0.086796 | NM-K_not_in_group | 0.164831 |
| 0.086796 | NM-K_in_group     | 1        |
| 0.000424 | NM-K_not_in_group | 0.000597 |
| 0.001636 | NM-K_not_in_group | 0.001416 |
| 0.001636 | NM-K_not_in_group | 0.001416 |
| 0.001636 | NM-K_not_in_group | 0.001416 |
| 0.002192 | NM-K_not_in_group | 0.004715 |
| 0.000815 | NM-K_not_in_group | 0.173207 |
| 0.002255 | NM-K_not_in_group | 0.009226 |
| 0.002704 | NM-K_not_in_group | 0.023752 |
| 0.000198 | NM-K_not_in_group | 0.000029 |

diffusion\_prioritization\_ALL

|          |                   |          |
|----------|-------------------|----------|
| 0.005898 | NM-K_not_in_group | 0.009945 |
| 0.001918 | NM-K_not_in_group | 0.001723 |
| 0.001918 | NM-K_not_in_group | 0.001723 |
| 0.000374 | NM-K_not_in_group | 0.005777 |
| 0.001601 | NM-K_not_in_group | 0.00121  |
| 0.006935 | NM-K_not_in_group | 0.007748 |
| 0.00057  | NM-K_not_in_group | 0.024007 |
| 0.08449  | NM-K_in_group     | 1        |
| 0.003805 | NM-K_not_in_group | 0.001176 |
| 0.001886 | NM-K_not_in_group | 0.020932 |
| 0.000132 | NM-K_not_in_group | 0.000168 |
| 0.001981 | NM-K_not_in_group | 0.004339 |
| 0.001145 | NM-K_not_in_group | 0.089834 |
| 0.006146 | NM-K_not_in_group | 0.000706 |
| 0.001779 | NM-K_not_in_group | 0.004121 |
| 0.001399 | NM-K_not_in_group | 0.001807 |
| 0.000723 | NM-K_not_in_group | 0.000937 |
| 0.000723 | NM-K_not_in_group | 0.000937 |
| 0.000723 | NM-K_not_in_group | 0.000937 |
| 0.001319 | NM-K_not_in_group | 0.01403  |
| 0.001319 | NM-K_in_group     | 1        |
| 0.001319 | NM-K_not_in_group | 0.01403  |
| 0.001782 | NM-K_not_in_group | 0.004226 |
| 0.001782 | NM-K_not_in_group | 0.004226 |
| 0.003787 | NM-K_not_in_group | 0.025482 |
| 0.002185 | NM-K_not_in_group | 0.005667 |
| 0.001952 | NM-K_not_in_group | 0.002683 |
| 0.002872 | NM-K_not_in_group | 0.00237  |
| 0.000056 | NM-K_not_in_group | 0.050644 |
| 0.000056 | NM-K_not_in_group | 0.050644 |
| 0.000056 | NM-K_in_group     | 1        |
| 0.000112 | NM-K_not_in_group | 0.001558 |
| 0.000155 | NM-K_not_in_group | 0.000877 |

## diffusion\_prioritization\_ALL

|          |                   |          |
|----------|-------------------|----------|
| 0.000155 | NM-K_not_in_group | 0.000877 |
| 0.000155 | NM-K_not_in_group | 0.000877 |
| 0.000155 | NM-K_not_in_group | 0.000877 |
| 0.000551 | NM-K_in_group     | 1        |
| 0.000873 | NM-K_not_in_group | 0.011285 |
| 0.001799 | NM-K_not_in_group | 0.004861 |
| 0.000975 | NM-K_not_in_group | 0.001893 |
| 0.016966 | NM-K_not_in_group | 0.067313 |
| 0.016966 | NM-K_not_in_group | 0.067313 |
| 0.001136 | NM-K_not_in_group | 0.001485 |
| 0.00053  | NM-K_not_in_group | 0.000527 |
| 0.00035  | NM-K_not_in_group | 0.005413 |
| 0.00177  | NM-K_not_in_group | 0.004005 |
| 0.001317 | NM-K_not_in_group | 0.009408 |
| 0.010531 | NM-K_not_in_group | 0.009095 |
| 0.005296 | NM-K_not_in_group | 0.00456  |
| 0.000054 | NM-K_not_in_group | 0.048715 |
| 0.001336 | NM-K_not_in_group | 0.00926  |
| 0.005693 | NM-K_not_in_group | 0.020609 |
| 0.002922 | NM-K_not_in_group | 0.000279 |
| 0.045175 | NM-K_in_group     | 1        |
| 0.006624 | NM-K_not_in_group | 0.011862 |
| 0.000503 | NM-K_not_in_group | 0.010974 |
| 0.000503 | NM-K_not_in_group | 0.010974 |
| 0.005537 | NM-K_not_in_group | 0.00045  |
| 0.005537 | NM-K_not_in_group | 0.00045  |
| 0.001624 | NM-K_not_in_group | 0.001515 |
| 1        | NM-K_not_in_group | 0.052202 |
| 0.052643 | NM-K_not_in_group | 0.052202 |

diffusion\_prioritization\_ALL

|          |                   |          |
|----------|-------------------|----------|
| 0.052643 | NM-K_in_group     | 1        |
| 0.052643 | NM-K_not_in_group | 0.052202 |
| 0.052643 | NM-K_not_in_group | 0.052202 |
| 0.008278 | NM-K_not_in_group | 0.007966 |
| 0.002838 | NM-K_not_in_group | 0.006163 |
| 0.010676 | NM-K_not_in_group | 0.03292  |
| 0.000657 | NM-K_not_in_group | 0.000853 |
| 0.001144 | NM-K_not_in_group | 0.001141 |
| 0.003267 | NM-K_not_in_group | 0.0143   |
| 0.005595 | NM-K_not_in_group | 0.005193 |
| 0.000627 | NM-K_not_in_group | 0.008077 |
| 0.000346 | NM-K_not_in_group | 0.00183  |
| 0.000228 | NM-K_not_in_group | 0.025205 |
| 0.00183  | NM-K_not_in_group | 0.006358 |
| 0.235251 | NM-K_not_in_group | 0.000107 |
| 1        | NM-K_not_in_group | 0.000107 |
| 0.000169 | NM-K_not_in_group | 0.000196 |
| 0.000169 | NM-K_not_in_group | 0.000196 |
| 0.000169 | NM-K_not_in_group | 0.000196 |
| 0.004044 | NM-K_not_in_group | 0.002765 |
| 0.125542 | NM-K_not_in_group | 0.000394 |
| 0.125542 | NM-K_not_in_group | 0.000394 |
| 0.001988 | NM-K_not_in_group | 0.004763 |

## diffusion\_prioritization\_ALL

|          |                   |          |
|----------|-------------------|----------|
| 0.001988 | NM-K_not_in_group | 0.004763 |
| 0.001988 | NM-K_not_in_group | 0.004763 |
| 0.001114 | NM-K_not_in_group | 0.001125 |
| 0.001851 | NM-K_not_in_group | 0.006976 |
| 0.000765 | NM-K_not_in_group | 0.001519 |
| 0.000247 | NM-K_not_in_group | 0.070423 |
| 0.001098 | NM-K_not_in_group | 0.005838 |
| 0.000133 | NM-K_not_in_group | 0.000446 |
| 0.001583 | NM-K_not_in_group | 0.001165 |
| 0.01158  | NM-K_not_in_group | 0.00088  |
| 1        | NM-K_not_in_group | 0.129267 |
| 0.000742 | NM-K_not_in_group | 0.005628 |
| 0.004413 | NM-K_not_in_group | 0.136124 |
| 0.0006   | NM-K_not_in_group | 0.006753 |
| 0.001717 | NM-K_not_in_group | 0.003705 |
| 0.018963 | NM-K_in_group     | 1        |
| 0.000386 | NM-K_not_in_group | 0.016511 |
| 0.000982 | NM-K_not_in_group | 0.004638 |
| 0.000592 | NM-K_not_in_group | 0.00103  |
| 0.001961 | NM-K_not_in_group | 0.015258 |
| 0.006836 | NM-K_not_in_group | 0.03595  |
| 0.011774 | NM-K_not_in_group | 0.000132 |
| 0.000283 | NM-K_not_in_group | 0.003075 |
| 0.001502 | NM-K_not_in_group | 0.011464 |
| 0.000203 | NM-K_not_in_group | 0.000744 |
| 0.066639 | NM-K_not_in_group | 0.062617 |
| 0.003684 | NM-K_not_in_group | 0.010398 |
| 0.001237 | NM-K_not_in_group | 0.000805 |
| 0.001151 | NM-K_not_in_group | 0.000465 |

## diffusion\_prioritization\_ALL

|          |                   |          |
|----------|-------------------|----------|
| 0.001527 | NM-K_not_in_group | 0.017353 |
| 0.001077 | NM-K_not_in_group | 0.00085  |
| 0.001077 | NM-K_not_in_group | 0.00085  |
| 0.001077 | NM-K_not_in_group | 0.00085  |
| 0.000113 | NM-K_not_in_group | 0.001059 |
| 0.001506 | NM-K_not_in_group | 0.003796 |
| 0.006682 | NM-K_not_in_group | 0.009903 |
| 0.001511 | NM-K_not_in_group | 0.003931 |
| 0.000111 | NM-K_not_in_group | 0.000502 |
| 0.001097 | NM-K_not_in_group | 0.001211 |
| 0.001097 | NM-K_not_in_group | 0.001211 |
| 0.001097 | NM-K_not_in_group | 0.001211 |
| 0.000356 | NM-K_not_in_group | 0.004777 |
| 0.001641 | NM-K_not_in_group | 0.069908 |
| 0.005404 | NM-K_not_in_group | 0.022542 |
| 0.004107 | NM-K_not_in_group | 0.005792 |
| 0.000487 | NM-K_not_in_group | 0.112042 |
| 0.000487 | NM-K_not_in_group | 0.112042 |
| 0.000487 | NM-K_in_group     | 1        |
| 0.000487 | NM-K_in_group     | 1        |
| 0.000194 | NM-K_not_in_group | 0.000873 |
| 0.000194 | NM-K_not_in_group | 0.000873 |
| 0.000317 | NM-K_not_in_group | 0.000335 |
| 0.000276 | NM-K_not_in_group | 0.000193 |
| 0.006415 | NM-K_not_in_group | 0.008444 |
| 0.000597 | NM-K_not_in_group | 0.004361 |
| 0.002789 | NM-K_not_in_group | 0.006934 |
| 0.00077  | NM-K_not_in_group | 0.00603  |
| 0.000769 | NM-K_not_in_group | 0.00524  |
| 0.000307 | NM-K_not_in_group | 0.004596 |
| 0.001591 | NM-K_not_in_group | 0.000538 |
| 0.000249 | NM-K_not_in_group | 0.005584 |
| 0.000249 | NM-K_not_in_group | 0.005584 |
| 0.000249 | NM-K_not_in_group | 0.005584 |
| 1        | NM-K_not_in_group | 0.110314 |
| 0.026668 | NM-K_in_group     | 1        |
| 0.001454 | NM-K_not_in_group | 0.003259 |
| 0.001504 | NM-K_not_in_group | 0.007151 |
| 0.017506 | NM-K_not_in_group | 0.015538 |
| 1        | NM-K_not_in_group | 0.015538 |
| 0.017506 | NM-K_not_in_group | 0.015538 |

## diffusion\_prioritization\_ALL

|          |                   |          |
|----------|-------------------|----------|
| 0.017506 | NM-K_not_in_group | 0.015538 |
| 0.002583 | NM-K_not_in_group | 0.008106 |
| 0.081473 | NM-K_in_group     | 1        |
| 0.081473 | NM-K_not_in_group | 0.149841 |
| 0.081473 | NM-K_in_group     | 1        |
| 0.000976 | NM-K_not_in_group | 0.009566 |
| 0.015174 | NM-K_not_in_group | 0.166249 |
| 0.000509 | NM-K_not_in_group | 0.000263 |
| 0.001655 | NM-K_not_in_group | 0.012936 |
| 0.000427 | NM-K_not_in_group | 0.002942 |
| 0.001603 | NM-K_not_in_group | 0.002456 |
| 0.00599  | NM-K_not_in_group | 0.009103 |
| 0.000548 | NM-K_not_in_group | 0.001034 |
| 0.000548 | NM-K_not_in_group | 0.001034 |
| 0.006938 | NM-K_not_in_group | 0.006676 |
| 0.002473 | NM-K_not_in_group | 0.173477 |
| 0.002473 | NM-K_not_in_group | 0.173477 |
| 0.000185 | NM-K_not_in_group | 0.000392 |
| 0.000185 | NM-K_not_in_group | 0.000392 |
| 0.000698 | NM-K_not_in_group | 0.001577 |
| 0.126583 | NM-K_not_in_group | 0.001149 |
| 0.001303 | NM-K_not_in_group | 0.00089  |
| 0.011565 | NM-K_not_in_group | 0.007245 |
| 0.002428 | NM-K_not_in_group | 0.001277 |
| 0.002428 | NM-K_not_in_group | 0.001277 |
| 0.000105 | NM-K_not_in_group | 0.000978 |
| 0.000105 | NM-K_not_in_group | 0.000978 |
| 0.00139  | NM-K_not_in_group | 0.003505 |
| 0.00139  | NM-K_not_in_group | 0.003505 |
| 0.001759 | NM-K_not_in_group | 0.001825 |
| 0.001742 | NM-K_not_in_group | 0.002311 |
| 0.000551 | NM-K_not_in_group | 0.000756 |
| 0.000397 | NM-K_not_in_group | 0.00135  |
| 0.099106 | NM-K_not_in_group | 0.000644 |
| 0.000803 | NM-K_not_in_group | 0.006576 |



## diffusion\_prioritization\_ALL

|          |                   |          |
|----------|-------------------|----------|
| 0.000803 | NM-K_not_in_group | 0.006576 |
| 0.000012 | NM-K_not_in_group | 0.000191 |
| 0.002248 | NM-K_not_in_group | 0.001474 |
| 0.000103 | NM-K_not_in_group | 0.000463 |
| 0.001139 | NM-K_not_in_group | 0.005277 |
| 0.000072 | NM-K_not_in_group | 0.001161 |
| 0.00086  | NM-K_not_in_group | 0.008579 |
| 0.00086  | NM-K_in_group     | 1        |
| 0.00086  | NM-K_not_in_group | 0.008579 |
| 0.00086  | NM-K_not_in_group | 0.008579 |
| 0.001401 | NM-K_not_in_group | 0.00024  |
| 0.008176 | NM-K_not_in_group | 0.001908 |
| 0.001147 | NM-K_not_in_group | 0.001149 |
| 0.001147 | NM-K_not_in_group | 0.001149 |

diffusion\_prioritization\_ALL

|          |                   |          |
|----------|-------------------|----------|
| 0.001147 | NM-K_not_in_group | 0.001149 |
| 0.001147 | NM-K_not_in_group | 0.001149 |
| 0.001147 | NM-K_not_in_group | 0.001149 |
| 0.00082  | NM-K_not_in_group | 0.005392 |
| 0.001591 | NM-K_not_in_group | 0.020257 |
| 0.003389 | NM-K_not_in_group | 0.002317 |
| 0.000254 | NM-K_not_in_group | 0.000178 |
| 0.001392 | NM-K_not_in_group | 0.000238 |
| 0.002669 | NM-K_not_in_group | 0.009269 |
| 0.002512 | NM-K_not_in_group | 0.000307 |
| 0.176485 | NM-K_in_group     | 1        |
| 0.000701 | NM-K_not_in_group | 0.037937 |
| 0.000701 | NM-K_not_in_group | 0.037937 |
| 0.0001   | NM-K_not_in_group | 0.000453 |
| 0.0003   | NM-K_not_in_group | 0.013047 |
| 0.0003   | NM-K_not_in_group | 0.013047 |
| 0.0003   | NM-K_not_in_group | 0.013047 |
| 0.000175 | NM-K_not_in_group | 0.000564 |
| 0.001523 | NM-K_not_in_group | 0.001642 |
| 0.001714 | NM-K_not_in_group | 0.002558 |
| 0.00236  | NM-K_not_in_group | 0.005891 |
| 0.003356 | NM-K_not_in_group | 0.006852 |
| 0.006763 | NM-K_not_in_group | 0.155958 |
| 0.00047  | NM-K_not_in_group | 0.007433 |
| 0.007794 | NM-K_not_in_group | 0.006134 |
| 0.001314 | NM-K_not_in_group | 0.000907 |
| 0.00635  | NM-K_not_in_group | 0.01011  |
| 0.001609 | NM-K_not_in_group | 0.000119 |
| 0.001609 | NM-K_not_in_group | 0.000119 |
| 0.001609 | NM-K_not_in_group | 0.000119 |
| 0.001905 | NM-K_not_in_group | 0.001393 |
| 0.001905 | NM-K_not_in_group | 0.001393 |
| 0.001905 | NM-K_not_in_group | 0.001393 |
| 0.000416 | NM-K_not_in_group | 0.059352 |
| 0.000672 | NM-K_not_in_group | 0.001157 |
| 0.003745 | NM-K_not_in_group | 0.018997 |
| 0.000375 | NM-K_not_in_group | 0.003604 |
| 0.000375 | NM-K_not_in_group | 0.003604 |
| 0.000375 | NM-K_not_in_group | 0.003604 |

## diffusion\_prioritization\_ALL

|          |                   |          |
|----------|-------------------|----------|
| 0.020169 | NM-K_not_in_group | 0.000106 |
| 1        | NM-K_not_in_group | 0.000106 |
| 0.001364 | NM-K_not_in_group | 0.003109 |
| 0.002579 | NM-K_not_in_group | 0.033516 |
| 0.001212 | NM-K_not_in_group | 0.000828 |
| 0.000532 | NM-K_not_in_group | 0.002118 |
| 0.000877 | NM-K_not_in_group | 0.010415 |
| 0.014817 | NM-K_not_in_group | 0.000604 |
| 0.00437  | NM-K_not_in_group | 0.094301 |
| 0.000672 | NM-K_not_in_group | 0.001002 |
| 0.000496 | NM-K_not_in_group | 0.000646 |
| 0.000755 | NM-K_not_in_group | 0.00904  |
| 0.001888 | NM-K_not_in_group | 0.002537 |
| 0.000086 | NM-K_not_in_group | 0.00105  |
| 0.000193 | NM-K_not_in_group | 0.000777 |
| 0.000438 | NM-K_not_in_group | 0.000366 |
| 0.000856 | NM-K_not_in_group | 0.000914 |
| 0.000442 | NM-K_not_in_group | 0.011159 |
| 0.000442 | NM-K_not_in_group | 0.011159 |
| 0.000442 | NM-K_not_in_group | 0.011159 |
| 0.000313 | NM-K_not_in_group | 0.005486 |
| 0.002179 | NM-K_not_in_group | 0.006698 |
| 0.002179 | NM-K_not_in_group | 0.006698 |
| 0.000602 | NM-K_not_in_group | 0.00079  |
| 0.014274 | NM-K_not_in_group | 0.000582 |



## diffusion\_prioritization\_ALL

|          |                   |          |
|----------|-------------------|----------|
| 0.002571 | NM-K_not_in_group | 0.069505 |
| 0.002571 | NM-K_in_group     | 1        |
| 0.002571 | NM-K_not_in_group | 0.069505 |
| 0.002571 | NM-K_in_group     | 1        |
| 0.002571 | NM-K_not_in_group | 0.069505 |
| 0.002571 | NM-K_not_in_group | 0.069505 |
| 0.002571 | NM-K_in_group     | 1        |
| 0.002571 | NM-K_not_in_group | 0.069505 |
| 0.002571 | NM-K_not_in_group | 0.069505 |
| 0.000349 | NM-K_not_in_group | 0.076043 |
| 0.017443 | NM-K_not_in_group | 0.000408 |
| 0.000194 | NM-K_not_in_group | 0.008184 |
| 0.000219 | NM-K_not_in_group | 0.001552 |
| 0.035114 | NM-K_not_in_group | 0.073589 |
| 0.000232 | NM-K_not_in_group | 0.065542 |
| 0.028773 | NM-K_not_in_group | 0.129488 |
| 0.028773 | NM-K_in_group     | 1        |
| 0.028773 | NM-K_not_in_group | 0.129488 |
| 0.028773 | NM-K_not_in_group | 0.129488 |
| 0.028773 | NM-K_in_group     | 1        |
| 0.002207 | NM-K_not_in_group | 0.182809 |
| 0.000811 | NM-K_not_in_group | 0.008318 |
| 0.008014 | NM-K_not_in_group | 0.006949 |
| 0.00047  | NM-K_not_in_group | 0.000928 |
| 0.005745 | NM-K_not_in_group | 0.042131 |
| 0.000239 | NM-K_not_in_group | 0.003687 |
| 0.016732 | NM-K_not_in_group | 0.000658 |
| 0.001486 | NM-K_not_in_group | 0.044654 |
| 0.000336 | NM-K_in_group     | 1        |
| 0.000864 | NM-K_not_in_group | 0.00217  |
| 0.001056 | NM-K_not_in_group | 0.006415 |
| 0.003379 | NM-K_not_in_group | 0.014282 |
| 0.001402 | NM-K_not_in_group | 0.003174 |
| 0.002258 | NM-K_not_in_group | 0.038505 |
| 0.000275 | NM-K_not_in_group | 0.008605 |



## diffusion\_prioritization\_ALL

|          |                   |          |
|----------|-------------------|----------|
| 0.000147 | NM-K_not_in_group | 0.001379 |
| 0.000547 | NM-K_not_in_group | 0.005907 |
| 0.000079 | NM-K_not_in_group | 0.001252 |
| 0.000544 | NM-K_not_in_group | 0.00587  |
| 0.000974 | NM-K_not_in_group | 0.002701 |
| 0.017368 | NM-K_not_in_group | 0.000125 |
| 0.005997 | NM-K_not_in_group | 0.009176 |
| 0.001028 | NM-K_not_in_group | 0.005275 |
| 0.006762 | NM-K_not_in_group | 0.007753 |
| 0.000382 | NM-K_not_in_group | 0.002312 |
| 0.001693 | NM-K_not_in_group | 0.004786 |
| 0.004207 | NM-K_not_in_group | 0.018056 |
| 0.000325 | NM-K_not_in_group | 0.005373 |
| 0.000325 | NM-K_not_in_group | 0.005373 |
| 0.000365 | NM-K_not_in_group | 0.002424 |
| 0.001476 | NM-K_not_in_group | 0.0029   |
| 0.000938 | NM-K_not_in_group | 0.005682 |
| 0.000316 | NM-K_not_in_group | 0.063099 |
| 0.000147 | NM-K_not_in_group | 0.000473 |
| 0.005925 | NM-K_not_in_group | 0.011486 |
| 0.000142 | NM-K_not_in_group | 0.001328 |
| 0.000525 | NM-K_not_in_group | 0.001892 |
| 0.00283  | NM-K_not_in_group | 0.001827 |
| 0.001591 | NM-K_not_in_group | 0.003132 |
| 0.005664 | NM-K_not_in_group | 0.011437 |
| 0.001018 | NM-K_not_in_group | 0.000757 |
| 0.000474 | NM-K_not_in_group | 0.009956 |
| 0.001089 | NM-K_not_in_group | 0.003505 |
| 0.000569 | NM-K_not_in_group | 0.000524 |
| 0.000898 | NM-K_not_in_group | 0.001001 |





## diffusion\_prioritization\_ALL

|          |                   |          |
|----------|-------------------|----------|
| 0.000391 | NM-K_not_in_group | 0.000507 |
| 0.000698 | NM-K_not_in_group | 0.009962 |
| 0.001077 | NM-K_not_in_group | 0.006223 |
| 0.001855 | NM-K_not_in_group | 0.020398 |
| 0.000382 | NM-K_not_in_group | 0.003194 |
| 0.16314  | NM-K_not_in_group | 0.053323 |
| 0.16314  | NM-K_not_in_group | 0.053323 |
| 0.16314  | NM-K_not_in_group | 0.053323 |
| 1        | NM-K_not_in_group | 0.053323 |
| 0.16314  | NM-K_not_in_group | 0.053323 |
| 1        | NM-K_not_in_group | 0.053323 |
| 0.16314  | NM-K_not_in_group | 0.053323 |
| 1        | NM-K_not_in_group | 0.053323 |
| 0.062621 | NM-K_not_in_group | 0.028285 |
| 0.062621 | NM-K_not_in_group | 0.028285 |
| 0.001002 | NM-K_not_in_group | 0.004726 |
| 0.002163 | NM-K_not_in_group | 0.052948 |
| 0.035549 | NM-K_not_in_group | 0.004237 |
| 0.000162 | NM-K_not_in_group | 0.001    |
| 0.002483 | NM-K_not_in_group | 0.001678 |
| 0.002483 | NM-K_not_in_group | 0.001678 |
| 0.000028 | NM-K_not_in_group | 0.000118 |
| 0.000991 | NM-K_not_in_group | 0.001354 |
| 0.002365 | NM-K_not_in_group | 0.006417 |
| 0.003549 | NM-K_not_in_group | 0.000339 |
| 0.006313 | NM-K_not_in_group | 0.010375 |
| 0.000431 | NM-K_not_in_group | 0.00705  |
| 0.000431 | NM-K_not_in_group | 0.00705  |
| 0.000086 | NM-K_not_in_group | 0.001921 |
| 0.001424 | NM-K_not_in_group | 0.003098 |
| 0.001892 | NM-K_not_in_group | 0.018361 |
| 0.003734 | NM-K_not_in_group | 0.011805 |
| 0.003734 | NM-K_not_in_group | 0.011805 |
| 0.002385 | NM-K_not_in_group | 0.040913 |

## diffusion\_prioritization\_ALL

|          |                   |          |
|----------|-------------------|----------|
| 0.002385 | NM-K_not_in_group | 0.040913 |
| 0.002385 | NM-K_not_in_group | 0.040913 |
| 0.002385 | NM-K_not_in_group | 0.040913 |
| 0.024302 | NM-K_in_group     | 1        |
| 0.000467 | NM-K_not_in_group | 0.000398 |
| 0.000201 | NM-K_not_in_group | 0.000978 |
| 0.001416 | NM-K_not_in_group | 0.001379 |
| 0.006586 | NM-K_not_in_group | 0.008022 |
| 0.002649 | NM-K_not_in_group | 0.002196 |
| 0.005892 | NM-K_not_in_group | 0.01297  |
| 0.000283 | NM-K_not_in_group | 0.004895 |
| 0.006194 | NM-K_not_in_group | 0.009211 |
| 0.006194 | NM-K_not_in_group | 0.009211 |
| 0.000162 | NM-K_not_in_group | 0.002563 |
| 1        | NM-K_not_in_group | 0.008837 |
| 0.000212 | NM-K_not_in_group | 0.004712 |
| 0.005461 | NM-K_in_group     | 1        |
| 0.006499 | NM-K_not_in_group | 0.009172 |
| 0.00036  | NM-K_not_in_group | 0.000186 |
| 0.00036  | NM-K_not_in_group | 0.000186 |
| 0.00036  | NM-K_not_in_group | 0.000186 |
| 0.001344 | NM-K_not_in_group | 0.003689 |
| 0.001106 | NM-K_not_in_group | 0.017424 |
| 0.001112 | NM-K_not_in_group | 0.001906 |
| 0.001112 | NM-K_not_in_group | 0.001906 |
| 0.025501 | NM-K_not_in_group | 0.009564 |
| 0.00117  | NM-K_not_in_group | 0.00863  |
| 0.002552 | NM-K_not_in_group | 0.002603 |
| 0.000525 | NM-K_not_in_group | 0.000484 |
| 0.000525 | NM-K_not_in_group | 0.000484 |

## diffusion\_prioritization\_ALL

|          |                   |          |
|----------|-------------------|----------|
| 0.000525 | NM-K_not_in_group | 0.000484 |
| 0.001433 | NM-K_not_in_group | 0.038222 |
| 0.001496 | NM-K_not_in_group | 0.01544  |
| 0.006438 | NM-K_not_in_group | 0.000605 |
| 0.006438 | NM-K_not_in_group | 0.000605 |
| 0.006438 | NM-K_not_in_group | 0.000605 |
| 0.000331 | NM-K_not_in_group | 0.001191 |
| 0.000331 | NM-K_not_in_group | 0.001191 |
| 0.000331 | NM-K_not_in_group | 0.001191 |
| 0.000407 | NM-K_not_in_group | 0.011698 |
| 0.000407 | NM-K_not_in_group | 0.011698 |
| 0.002518 | NM-K_not_in_group | 0.003627 |
| 0.002518 | NM-K_not_in_group | 0.003627 |
| 0.002518 | NM-K_not_in_group | 0.003627 |
| 0.001295 | NM-K_not_in_group | 0.000332 |
| 0.002201 | NM-K_not_in_group | 0.036697 |
| 0.002201 | NM-K_not_in_group | 0.036697 |
| 0.003288 | NM-K_not_in_group | 0.001431 |
| 0.00008  | NM-K_not_in_group | 0.001787 |
| 0.000197 | NM-K_not_in_group | 0.003103 |
| 0.000633 | NM-K_not_in_group | 0.001319 |
| 0.00083  | NM-K_not_in_group | 0.002076 |
| 0.000667 | NM-K_not_in_group | 0.000329 |
| 0.002446 | NM-K_not_in_group | 0.002495 |
| 0.000008 | NM-K_not_in_group | 0.000134 |
| 0.000536 | NM-K_not_in_group | 0.00785  |
| 0.001496 | NM-K_not_in_group | 0.003452 |
| 0.005405 | NM-K_not_in_group | 0.009231 |
| 0.000296 | NM-K_not_in_group | 0.012214 |
| 0.000778 | NM-K_not_in_group | 0.003591 |
| 0.000112 | NM-K_not_in_group | 0.010088 |
| 0.000112 | NM-K_not_in_group | 0.010088 |
| 0.000112 | NM-K_not_in_group | 0.010088 |
| 0.000701 | NM-K_not_in_group | 0.00506  |
| 0.001033 | NM-K_not_in_group | 0.002794 |
| 0.000126 | NM-K_not_in_group | 0.000358 |
| 0.000638 | NM-K_not_in_group | 0.020369 |

## diffusion\_prioritization\_ALL

|          |                   |          |
|----------|-------------------|----------|
| 0.000638 | NM-K_not_in_group | 0.020369 |
| 0.000638 | NM-K_in_group     | 1        |
| 0.000638 | NM-K_not_in_group | 0.020369 |
| 0.005033 | NM-K_not_in_group | 0.007499 |
| 0.005033 | NM-K_not_in_group | 0.007499 |
| 0.000578 | NM-K_not_in_group | 0.006798 |
| 0.007022 | NM-K_not_in_group | 0.008788 |
| 0.000036 | NM-K_not_in_group | 0.000729 |
| 0.001187 | NM-K_not_in_group | 0.000626 |
| 0.000028 | NM-K_not_in_group | 0.00077  |
| 0.007425 | NM-K_not_in_group | 0.004957 |
| 0.000961 | NM-K_not_in_group | 0.001201 |
| 0.00021  | NM-K_not_in_group | 0.001412 |
| 0.000156 | NM-K_not_in_group | 0.002278 |
| 0.001529 | NM-K_not_in_group | 0.002992 |
| 0.000344 | NM-K_not_in_group | 0.00154  |
| 0.001102 | NM-K_not_in_group | 0.003251 |
| 0.001386 | NM-K_not_in_group | 0.018104 |
| 0.001386 | NM-K_not_in_group | 0.018104 |
| 0.011174 | NM-K_not_in_group | 0.160366 |
| 0.003173 | NM-K_not_in_group | 0.000558 |
| 0.000186 | NM-K_not_in_group | 0.002622 |
| 0.000569 | NM-K_not_in_group | 0.007186 |
| 0.001079 | NM-K_not_in_group | 0.00074  |
| 0.000024 | NM-K_not_in_group | 0.000102 |
| 0.000167 | NM-K_not_in_group | 0.001812 |
| 0.156202 | NM-K_not_in_group | 0.013788 |



## diffusion\_prioritization\_ALL

|          |                   |          |
|----------|-------------------|----------|
| 0.002964 | NM-K_not_in_group | 0.050568 |
| 0.002964 | NM-K_in_group     | 1        |
| 0.002964 | NM-K_not_in_group | 0.050568 |
| 0.005417 | NM-K_not_in_group | 0.010221 |
| 0.000727 | NM-K_not_in_group | 0.020363 |
| 0.000065 | NM-K_not_in_group | 0.000296 |
| 0.000174 | NM-K_not_in_group | 0.002271 |
| 0.001261 | NM-K_not_in_group | 0.001388 |
| 0.000606 | NM-K_not_in_group | 0.00082  |
| 0.002957 | NM-K_not_in_group | 0.00034  |
| 0.000298 | NM-K_not_in_group | 0.000435 |
| 0.000162 | NM-K_not_in_group | 0.000114 |
| 0.001462 | NM-K_not_in_group | 0.00292  |
| 0.000193 | NM-K_not_in_group | 0.000674 |
| 0.139083 | NM-K_not_in_group | 0.042949 |
| 0.000537 | NM-K_not_in_group | 0.000311 |



diffusion\_prioritization\_ALL

|          |                   |          |
|----------|-------------------|----------|
| 0.0003   | NM-K_not_in_group | 0.000155 |
| 0.000276 | NM-K_not_in_group | 0.004834 |
| 0.006406 | NM-K_not_in_group | 0.012825 |
| 0.006406 | NM-K_in_group     | 1        |
| 0.006406 | NM-K_not_in_group | 0.012825 |
| 0.006406 | NM-K_not_in_group | 0.012825 |
| 0.006406 | NM-K_not_in_group | 0.012825 |
| 0.001467 | NM-K_not_in_group | 0.001362 |
| 0.001467 | NM-K_not_in_group | 0.001362 |
| 0.001467 | NM-K_not_in_group | 0.001362 |
| 0.000268 | NM-K_not_in_group | 0.00505  |
| 0.000651 | NM-K_not_in_group | 0.001613 |
| 0.086448 | NM-K_in_group     | 1        |
| 0.086448 | NM-K_not_in_group | 0.08242  |
| 1        | NM-K_not_in_group | 0.08242  |
| 0.086448 | NM-K_in_group     | 1        |
| 1        | NM-K_not_in_group | 0.08242  |
| 0.086448 | NM-K_not_in_group | 0.08242  |
| 0.086448 | NM-K_not_in_group | 0.08242  |
| 0.000069 | NM-K_not_in_group | 0.001543 |
| 0.004113 | NM-K_not_in_group | 0.003958 |
| 0.000029 | NM-K_not_in_group | 0.000215 |
| 0.00233  | NM-K_not_in_group | 0.038741 |
| 0.000339 | NM-K_not_in_group | 0.000737 |
| 0.000025 | NM-K_not_in_group | 0.000098 |
| 0.000546 | NM-K_not_in_group | 0.006006 |
| 0.001275 | NM-K_not_in_group | 0.002386 |
| 0.000975 | NM-K_in_group     | 1        |
| 0.000975 | NM-K_not_in_group | 0.03777  |
| 0.000975 | NM-K_not_in_group | 0.03777  |
| 0.000975 | NM-K_not_in_group | 0.03777  |
| 0.00023  | NM-K_not_in_group | 0.00488  |
| 0.000274 | NM-K_not_in_group | 0.000362 |
| 0.003069 | NM-K_not_in_group | 0.00888  |



diffusion\_prioritization\_ALL

|          |                   |          |
|----------|-------------------|----------|
| 0.00155  | NM-K_not_in_group | 0.004174 |
| 0.00155  | NM-K_not_in_group | 0.004174 |
| 0.000515 | NM-K_not_in_group | 0.000399 |
| 0.000693 | NM-K_not_in_group | 0.000678 |
| 0.000274 | NM-K_not_in_group | 0.005125 |
| 0.000569 | NM-K_not_in_group | 0.00168  |
| 0.00201  | NM-K_not_in_group | 0.001374 |
| 0.002406 | NM-K_not_in_group | 0.041513 |
| 0.001054 | NM-K_not_in_group | 0.011955 |
| 0.001054 | NM-K_not_in_group | 0.011955 |
| 0.001054 | NM-K_not_in_group | 0.011955 |
| 0.001543 | NM-K_not_in_group | 0.019999 |
| 0.001925 | NM-K_not_in_group | 0.051692 |
| 0.001925 | NM-K_in_group     | 1        |
| 0.001925 | NM-K_not_in_group | 0.051692 |
| 0.000776 | NM-K_not_in_group | 0.048795 |
| 0.00005  | NM-K_not_in_group | 0.000698 |
| 0.000168 | NM-K_not_in_group | 0.019788 |
| 0.008502 | NM-K_not_in_group | 0.003834 |
| 0.000092 | NM-K_not_in_group | 0.003854 |
| 0.009111 | NM-K_not_in_group | 0.000371 |
| 0.005238 | NM-K_not_in_group | 0.009466 |
| 0.000178 | NM-K_not_in_group | 0.000622 |
| 0.000178 | NM-K_not_in_group | 0.000622 |
| 0.000178 | NM-K_not_in_group | 0.000622 |
| 0.000321 | NM-K_not_in_group | 0.002502 |
| 0.002406 | NM-K_not_in_group | 0.039789 |
| 0.002405 | NM-K_not_in_group | 0.040131 |
| 0.000191 | NM-K_not_in_group | 0.005128 |
| 0.0001   | NM-K_not_in_group | 0.002112 |
| 0.0001   | NM-K_not_in_group | 0.002112 |
| 0.0001   | NM-K_not_in_group | 0.002112 |
| 0.000396 | NM-K_not_in_group | 0.000682 |
| 0.000024 | NM-K_not_in_group | 0.021987 |
| 0.018386 | NM-K_not_in_group | 0.00068  |
| 0.000088 | NM-K_not_in_group | 0.000032 |

## diffusion\_prioritization\_ALL

|          |                   |          |
|----------|-------------------|----------|
| 0.000088 | NM-K_not_in_group | 0.000032 |
| 0.000926 | NM-K_not_in_group | 0.175829 |
| 0.000926 | NM-K_in_group     | 1        |
| 0.000926 | NM-K_not_in_group | 0.175829 |
| 0.000129 | NM-K_not_in_group | 0.000932 |
| 0.000238 | NM-K_not_in_group | 0.010003 |
| 0.000238 | NM-K_not_in_group | 0.010003 |
| 0.000256 | NM-K_not_in_group | 0.000338 |
| 0.000673 | NM-K_not_in_group | 0.000544 |
| 0.002459 | NM-K_not_in_group | 0.000697 |
| 0.000229 | NM-K_not_in_group | 0.003886 |
| 0.002333 | NM-K_not_in_group | 0.055424 |
| 0.002333 | NM-K_not_in_group | 0.055424 |
| 0.00243  | NM-K_not_in_group | 0.005858 |
| 0.000214 | NM-K_not_in_group | 0.191684 |
| 0.000619 | NM-K_not_in_group | 0.00463  |
| 0.000198 | NM-K_not_in_group | 0.005215 |
| 0.000047 | NM-K_not_in_group | 0.000649 |
| 0.000047 | NM-K_not_in_group | 0.000649 |
| 0.000085 | NM-K_not_in_group | 0.000031 |
| 0.000854 | NM-K_not_in_group | 0.001371 |
| 0.000716 | NM-K_in_group     | 1        |
| 0.000716 | NM-K_not_in_group | 0.045046 |
| 0.000716 | NM-K_not_in_group | 0.045046 |
| 0.000716 | NM-K_in_group     | 1        |
| 0.015918 | NM-K_not_in_group | 0.003332 |
| 0.000472 | NM-K_not_in_group | 0.000297 |
| 0.001429 | NM-K_not_in_group | 0.002016 |
| 0.001923 | NM-K_not_in_group | 0.005765 |

## diffusion\_prioritization\_ALL

|          |                   |          |
|----------|-------------------|----------|
| 0.000299 | NM-K_not_in_group | 0.002327 |
| 0.001089 | NM-K_not_in_group | 0.00881  |
| 0.000571 | NM-K_not_in_group | 0.002002 |
| 0.000147 | NM-K_not_in_group | 0.001435 |
| 0.002403 | NM-K_not_in_group | 0.002958 |
| 0.000453 | NM-K_not_in_group | 0.001497 |
| 0.005532 | NM-K_not_in_group | 0.011075 |
| 0.00017  | NM-K_not_in_group | 0.005454 |
| 0.00017  | NM-K_not_in_group | 0.005454 |
| 0.00017  | NM-K_not_in_group | 0.005454 |
| 0.000229 | NM-K_not_in_group | 0.002742 |
| 0.000473 | NM-K_not_in_group | 0.000619 |
| 0.000473 | NM-K_not_in_group | 0.000619 |
| 0.000172 | NM-K_not_in_group | 0.005231 |
| 0.005507 | NM-K_not_in_group | 0.010795 |
| 0.000519 | NM-K_not_in_group | 0.000558 |
| 0.002602 | NM-K_not_in_group | 0.001637 |
| 0.000022 | NM-K_not_in_group | 0.020298 |
| 0.000022 | NM-K_not_in_group | 0.020298 |
| 0.000179 | NM-K_not_in_group | 0.004277 |
| 0.012803 | NM-K_not_in_group | 0.003389 |
| 0.002377 | NM-K_not_in_group | 0.040562 |
| 0.001976 | NM-K_not_in_group | 0.002787 |
| 0.000091 | NM-K_not_in_group | 0.000848 |
| 0.000242 | NM-K_not_in_group | 0.006779 |
| 0.000153 | NM-K_not_in_group | 0.000161 |

## diffusion\_prioritization\_ALL

|          |                   |          |
|----------|-------------------|----------|
| 0.000119 | NM-K_not_in_group | 0.00086  |
| 0.000915 | NM-K_not_in_group | 0.159098 |
| 0.023986 | NM-K_not_in_group | 0.099953 |
| 0.000052 | NM-K_not_in_group | 0.000236 |
| 0.003677 | NM-K_not_in_group | 0.001805 |
| 0.004928 | NM-K_not_in_group | 0.01163  |
| 0.004928 | NM-K_not_in_group | 0.01163  |
| 0.000178 | NM-K_not_in_group | 0.000411 |
| 0.000084 | NM-K_not_in_group | 0.000549 |
| 0.000346 | NM-K_not_in_group | 0.000684 |
| 0.000346 | NM-K_not_in_group | 0.000684 |
| 0.000141 | NM-K_not_in_group | 0.002173 |
| 0.001183 | NM-K_not_in_group | 0.002568 |
| 0.001183 | NM-K_not_in_group | 0.002568 |
| 0.00026  | NM-K_not_in_group | 0.000341 |
| 0.000359 | NM-K_not_in_group | 0.001032 |
| 0.000473 | NM-K_not_in_group | 0.020469 |
| 0.001881 | NM-K_not_in_group | 0.005826 |
| 0.104132 | NM-K_not_in_group | 0.034036 |
| 0.000703 | NM-K_not_in_group | 0.007801 |
| 0.000514 | NM-K_not_in_group | 0.00133  |
| 0.000514 | NM-K_not_in_group | 0.00133  |
| 0.000514 | NM-K_not_in_group | 0.00133  |
| 0.000762 | NM-K_not_in_group | 0.002649 |
| 0.000762 | NM-K_not_in_group | 0.002649 |
| 0.000748 | NM-K_not_in_group | 0.000999 |
| 0.002907 | NM-K_not_in_group | 0.00134  |
| 0.002907 | NM-K_not_in_group | 0.00134  |
| 0.002907 | NM-K_not_in_group | 0.00134  |
| 0.000825 | NM-K_not_in_group | 0.006411 |
| 0.000205 | NM-K_not_in_group | 0.002259 |
| 0.000627 | NM-K_not_in_group | 0.000428 |
| 0.000627 | NM-K_not_in_group | 0.000428 |
| 1        | NM-K_not_in_group | 0.109646 |
| 0.000659 | NM-K_not_in_group | 0.000486 |
| 0.000659 | NM-K_not_in_group | 0.000486 |
| 0.00097  | NM-K_not_in_group | 0.007362 |
| 0.001218 | NM-K_not_in_group | 0.001349 |
| 0.000335 | NM-K_not_in_group | 0.000903 |
| 0.000335 | NM-K_not_in_group | 0.000903 |
| 0.000335 | NM-K_not_in_group | 0.000903 |

## diffusion\_prioritization\_ALL

|          |                   |          |
|----------|-------------------|----------|
| 0.000335 | NM-K_not_in_group | 0.000903 |
| 0.000087 | NM-K_not_in_group | 0.00028  |
| 0.002759 | NM-K_not_in_group | 0.003171 |
| 0.003999 | NM-K_not_in_group | 0.006573 |
| 0.000315 | NM-K_not_in_group | 0.001377 |
| 0.000162 | NM-K_not_in_group | 0.004169 |
| 0.000157 | NM-K_not_in_group | 0.002449 |
| 0.004807 | NM-K_not_in_group | 0.009614 |
| 0.032443 | NM-K_not_in_group | 0.134339 |
| 0.000135 | NM-K_not_in_group | 0.002497 |
| 0.00028  | NM-K_not_in_group | 0.000671 |
| 0.000217 | NM-K_not_in_group | 0.002531 |
| 0.002364 | NM-K_not_in_group | 0.006533 |
| 0.000142 | NM-K_not_in_group | 0.001111 |
| 0.002345 | NM-K_not_in_group | 0.001475 |
| 0.000048 | NM-K_not_in_group | 0.000218 |
| 0.000534 | NM-K_not_in_group | 0.002476 |

## diffusion\_prioritization\_ALL

|          |                   |          |
|----------|-------------------|----------|
| 0.001284 | NM-K_not_in_group | 0.018182 |
| 0.000164 | NM-K_not_in_group | 0.000379 |
| 1        | NM-K_not_in_group | 0.003004 |
| 0.000207 | NM-K_not_in_group | 0.00281  |
| 0.000207 | NM-K_not_in_group | 0.00281  |
| 0.000207 | NM-K_not_in_group | 0.00281  |
| 0.001745 | NM-K_not_in_group | 0.003642 |
| 0.000235 | NM-K_not_in_group | 0.000552 |
| 0.000335 | NM-K_not_in_group | 0.000309 |
| 0.000226 | NM-K_not_in_group | 0.003576 |
| 0.000226 | NM-K_not_in_group | 0.003576 |
| 0.000876 | NM-K_not_in_group | 0.000585 |
| 0.000322 | NM-K_not_in_group | 0.001184 |
| 0.000289 | NM-K_not_in_group | 0.005889 |
| 0.000721 | NM-K_not_in_group | 0.001438 |
| 0.000721 | NM-K_not_in_group | 0.001438 |
| 0.000721 | NM-K_not_in_group | 0.001438 |
| 0.000151 | NM-K_not_in_group | 0.077022 |
| 0.000151 | NM-K_not_in_group | 0.077022 |
| 0.000151 | NM-K_not_in_group | 0.077022 |
| 0.000452 | NM-K_not_in_group | 0.001186 |
| 0.00019  | NM-K_not_in_group | 0.003216 |
| 0.001266 | NM-K_not_in_group | 0.001377 |
| 0.001266 | NM-K_not_in_group | 0.001377 |
| 0.001266 | NM-K_not_in_group | 0.001377 |
| 0.00913  | NM-K_not_in_group | 0.000146 |
| 0.002017 | NM-K_not_in_group | 0.004383 |
| 0.000277 | NM-K_not_in_group | 0.000859 |
| 0.000144 | NM-K_not_in_group | 0.002604 |
| 0.000079 | NM-K_not_in_group | 0.001194 |
| 0.001288 | NM-K_not_in_group | 0.008669 |
| 0.001288 | NM-K_not_in_group | 0.008669 |











## diffusion\_prioritization\_ALL

|          |                   |          |
|----------|-------------------|----------|
| 0.000409 | NM-K_not_in_group | 0.007291 |
| 0.003184 | NM-K_not_in_group | 0.01153  |
| 0.000107 | NM-K_not_in_group | 0.000075 |
| 0.000759 | NM-K_not_in_group | 0.004297 |
| 0.002911 | NM-K_not_in_group | 0.003612 |
| 0.00509  | NM-K_not_in_group | 0.001114 |
| 0.002704 | NM-K_not_in_group | 0.009554 |
| 0.021658 | NM-K_not_in_group | 0.001121 |
| 0.006263 | NM-K_not_in_group | 0.001391 |
| 0.002327 | NM-K_not_in_group | 0.006145 |
| 0.000831 | NM-K_not_in_group | 0.000436 |
| 0.000831 | NM-K_not_in_group | 0.000436 |
| 0.000831 | NM-K_not_in_group | 0.000436 |
| 0.051101 | NM-K_not_in_group | 0.000464 |
| 0.005729 | NM-K_not_in_group | 0.000717 |
| 0.005729 | NM-K_not_in_group | 0.000717 |
| 0.001993 | NM-K_not_in_group | 0.084995 |
| 0.000232 | NM-K_not_in_group | 0.05531  |
| 0.000514 | NM-K_not_in_group | 0.002829 |
| 0.000015 | NM-K_not_in_group | 0.000063 |
| 0.000083 | NM-K_not_in_group | 0.038213 |
| 0.000083 | NM-K_not_in_group | 0.038213 |
| 0.000083 | NM-K_in_group     | 1        |
| 0.000083 | NM-K_not_in_group | 0.038213 |
| 0.000083 | NM-K_not_in_group | 0.038213 |
| 0.000083 | NM-K_not_in_group | 0.038213 |
| 0.000283 | NM-K_not_in_group | 0.012076 |
| 0.002818 | NM-K_not_in_group | 0.064983 |
| 0.002818 | NM-K_not_in_group | 0.064983 |
| 0.002818 | NM-K_not_in_group | 0.064983 |
| 0.002323 | NM-K_not_in_group | 0.001077 |
| 0.003571 | NM-K_not_in_group | 0.005945 |



## diffusion\_prioritization\_ALL

|          |                   |          |
|----------|-------------------|----------|
| 0.000744 | NM-K_not_in_group | 0.000931 |
| 0.000531 | NM-K_not_in_group | 0.004843 |
| 0.000524 | NM-K_not_in_group | 0.001686 |
| 0.000315 | NM-K_not_in_group | 0.000663 |
| 0.000756 | NM-K_not_in_group | 0.001311 |
| 0.000623 | NM-K_not_in_group | 0.024109 |
| 0.003424 | NM-K_not_in_group | 0.002242 |
| 0.004831 | NM-K_not_in_group | 0.001945 |
| 0.00036  | NM-K_not_in_group | 0.000359 |
| 0.047175 | NM-K_not_in_group | 0.000428 |
| 1        | NM-K_not_in_group | 0.000428 |
| 0.000534 | NM-K_not_in_group | 0.022832 |
| 0.02398  | NM-K_not_in_group | 0.146892 |
| 0.001752 | NM-K_not_in_group | 0.001434 |

## diffusion\_prioritization\_ALL

|          |                   |          |
|----------|-------------------|----------|
| 0.001752 | NM-K_not_in_group | 0.001434 |
| 0.001674 | NM-K_not_in_group | 0.000882 |
| 0.001674 | NM-K_not_in_group | 0.000882 |
| 0.000261 | NM-K_not_in_group | 0.001295 |
| 0.007102 | NM-K_not_in_group | 0.000452 |
| 0.000226 | NM-K_not_in_group | 0.048113 |
| 0.000287 | NM-K_not_in_group | 0.001252 |
| 0.002591 | NM-K_not_in_group | 0.002069 |
| 0.000042 | NM-K_not_in_group | 0.000949 |
| 0.000646 | NM-K_not_in_group | 0.015993 |
| 0.000312 | NM-K_not_in_group | 0.000922 |
| 0.000312 | NM-K_not_in_group | 0.000922 |
| 0.001912 | NM-K_not_in_group | 0.008178 |
| 0.000522 | NM-K_not_in_group | 0.000089 |
| 0.000147 | NM-K_not_in_group | 0.002518 |
| 0.000832 | NM-K_not_in_group | 0.001372 |
| 0.000706 | NM-K_not_in_group | 0.000543 |
| 0.000058 | NM-K_not_in_group | 0.001305 |
| 0.003973 | NM-K_not_in_group | 0.002709 |

## diffusion\_prioritization\_ALL

|          |                   |          |
|----------|-------------------|----------|
| 0.000113 | NM-K_not_in_group | 0.000397 |
| 0.001687 | NM-K_not_in_group | 0.006357 |
| 0.000936 | NM-K_not_in_group | 0.000114 |
| 0.00093  | NM-K_not_in_group | 0.000738 |
| 0.000086 | NM-K_not_in_group | 0.000944 |
| 0.000041 | NM-K_not_in_group | 0.000924 |
| 0.000041 | NM-K_not_in_group | 0.000924 |
| 0.003775 | NM-K_not_in_group | 0.004044 |
| 0.00004  | NM-K_not_in_group | 0.000624 |
| 0.000566 | NM-K_not_in_group | 0.000445 |
| 0.00139  | NM-K_not_in_group | 0.042875 |
| 0.00139  | NM-K_not_in_group | 0.042875 |
| 0.00139  | NM-K_in_group     | 1        |
| 0.00139  | NM-K_not_in_group | 0.042875 |
| 0.00139  | NM-K_not_in_group | 0.042875 |
| 0.000915 | NM-K_not_in_group | 0.001931 |
| 0.000189 | NM-K_not_in_group | 0.002127 |
| 0.000056 | NM-K_not_in_group | 0.001264 |

## diffusion\_prioritization\_ALL

|          |                   |          |
|----------|-------------------|----------|
| 0.000056 | NM-K_not_in_group | 0.001264 |
| 0.000056 | NM-K_not_in_group | 0.001264 |
| 0.0016   | NM-K_not_in_group | 0.001588 |
| 0.001295 | NM-K_not_in_group | 0.001404 |
| 0.000344 | NM-K_not_in_group | 0.004318 |
| 0.000791 | NM-K_not_in_group | 0.001306 |
| 0.000171 | NM-K_not_in_group | 0.004717 |
| 0.000532 | NM-K_not_in_group | 0.008383 |
| 0.000532 | NM-K_not_in_group | 0.008383 |
| 0.000102 | NM-K_not_in_group | 0.000539 |
| 0.001165 | NM-K_not_in_group | 0.001114 |
| 0.001447 | NM-K_not_in_group | 0.000495 |
| 0.001385 | NM-K_not_in_group | 0.001898 |
| 0.000314 | NM-K_not_in_group | 0.002594 |
| 0.000033 | NM-K_not_in_group | 0.000522 |
| 0.000033 | NM-K_not_in_group | 0.000522 |
| 0.000694 | NM-K_not_in_group | 0.000709 |
| 0.000671 | NM-K_not_in_group | 0.000839 |
| 0.000457 | NM-K_not_in_group | 0.028753 |
| 0.000792 | NM-K_not_in_group | 0.001257 |
| 0.00034  | NM-K_not_in_group | 0.000521 |
| 0.005369 | NM-K_not_in_group | 0.000219 |
| 0.000114 | NM-K_not_in_group | 0.005108 |
| 0.000158 | NM-K_not_in_group | 0.001848 |
| 0.001764 | NM-K_not_in_group | 0.006429 |
| 0.001764 | NM-K_not_in_group | 0.006429 |
| 0.020835 | NM-K_not_in_group | 0.170243 |
| 0.002607 | NM-K_not_in_group | 0.00049  |
| 0.002607 | NM-K_not_in_group | 0.00049  |
| 0.002607 | NM-K_not_in_group | 0.00049  |
| 0.00202  | NM-K_not_in_group | 0.00266  |
| 0.00202  | NM-K_not_in_group | 0.00266  |
| 0.00202  | NM-K_not_in_group | 0.00266  |
| 0.000004 | NM-K_not_in_group | 0.000064 |
| 0.000004 | NM-K_not_in_group | 0.000064 |
| 0.0012   | NM-K_not_in_group | 0.001244 |
| 0.000879 | NM-K_not_in_group | 0.002184 |
| 0.001037 | NM-K_not_in_group | 0.002423 |
| 0.000268 | NM-K_not_in_group | 0.000665 |
| 0.002065 | NM-K_not_in_group | 0.00267  |
| 0.000208 | NM-K_not_in_group | 0.001688 |
| 0.000208 | NM-K_not_in_group | 0.001688 |



diffusion\_prioritization\_ALL

|          |                   |          |
|----------|-------------------|----------|
| 0.000208 | NM-K_not_in_group | 0.001688 |
| 0.001513 | NM-K_not_in_group | 0.001116 |
| 0.000524 | NM-K_not_in_group | 0.000412 |
| 0.003608 | NM-K_not_in_group | 0.001416 |
| 0.000464 | NM-K_not_in_group | 0.003684 |
| 0.000138 | NM-K_not_in_group | 0.004736 |
| 0.001554 | NM-K_not_in_group | 0.001442 |
| 0.000014 | NM-K_not_in_group | 0.012956 |
| 0.002352 | NM-K_not_in_group | 0.001751 |
| 0.002352 | NM-K_not_in_group | 0.001751 |
| 0.002352 | NM-K_not_in_group | 0.001751 |
| 0.000174 | NM-K_not_in_group | 0.000303 |
| 0.000464 | NM-K_not_in_group | 0.00149  |
| 0.003626 | NM-K_not_in_group | 0.002296 |
| 0.003626 | NM-K_not_in_group | 0.002296 |
| 0.003626 | NM-K_not_in_group | 0.002296 |
| 0.001477 | NM-K_not_in_group | 0.001466 |





diffusion\_prioritization\_ALL

|          |                   |          |
|----------|-------------------|----------|
| 0.000314 | NM-K_not_in_group | 0.000481 |
| 0.001039 | NM-K_not_in_group | 0.001564 |
| 0.001039 | NM-K_not_in_group | 0.001564 |
| 0.001924 | NM-K_not_in_group | 0.000563 |
| 0.000204 | NM-K_not_in_group | 0.002201 |
| 0.001375 | NM-K_not_in_group | 0.004733 |
| 0.000561 | NM-K_not_in_group | 0.019997 |
| 0.133257 | NM-K_not_in_group | 0.000383 |
| 0.000139 | NM-K_not_in_group | 0.005351 |
| 0.000139 | NM-K_in_group     | 1        |

diffusion\_prioritization\_ALL

|          |                   |          |
|----------|-------------------|----------|
| 0.000136 | NM-K_not_in_group | 0.00176  |
| 0.001496 | NM-K_not_in_group | 0.00031  |
| 0.000303 | NM-K_not_in_group | 0.000328 |
| 0.000053 | NM-K_not_in_group | 0.0005   |
| 0.001057 | NM-K_not_in_group | 0.002158 |
| 0.001064 | NM-K_not_in_group | 0.001085 |
| 0.001064 | NM-K_not_in_group | 0.001085 |
| 0.001064 | NM-K_not_in_group | 0.001085 |
| 0.000524 | NM-K_not_in_group | 0.000696 |
| 0.001542 | NM-K_not_in_group | 0.001449 |
| 0.00131  | NM-K_not_in_group | 0.010287 |
| 0.000409 | NM-K_not_in_group | 0.000358 |
| 0.000031 | NM-K_not_in_group | 0.000139 |
| 0.000025 | NM-K_not_in_group | 0.000068 |
| 0.000315 | NM-K_not_in_group | 0.002727 |
| 0.000105 | NM-K_not_in_group | 0.000242 |
| 0.000414 | NM-K_not_in_group | 0.007656 |
| 0.001254 | NM-K_not_in_group | 0.001629 |
| 0.001486 | NM-K_not_in_group | 0.000934 |
| 0.001002 | NM-K_not_in_group | 0.000624 |
| 0.001331 | NM-K_not_in_group | 0.001321 |
| 0.004498 | NM-K_not_in_group | 0.000471 |
| 0.000115 | NM-K_not_in_group | 0.000268 |
| 0.000032 | NM-K_not_in_group | 0.000507 |
| 0.003742 | NM-K_not_in_group | 0.005529 |
| 0.000647 | NM-K_not_in_group | 0.001014 |
| 0.000647 | NM-K_not_in_group | 0.001014 |

diffusion\_prioritization\_ALL

|          |                   |          |
|----------|-------------------|----------|
| 0.000647 | NM-K_not_in_group | 0.001014 |
| 0.000316 | NM-K_not_in_group | 0.0006   |
| 0.001949 | NM-K_not_in_group | 0.001469 |
| 0.000403 | NM-K_not_in_group | 0.000466 |
| 0.00009  | NM-K_not_in_group | 0.000441 |
| 0.000291 | NM-K_not_in_group | 0.000472 |
| 0.001285 | NM-K_not_in_group | 0.003713 |
| 0.001285 | NM-K_not_in_group | 0.003713 |
| 0.000512 | NM-K_not_in_group | 0.004937 |
| 0.001693 | NM-K_not_in_group | 0.003335 |
| 0.000103 | NM-K_not_in_group | 0.00178  |
| 0.00235  | NM-K_not_in_group | 0.003863 |
| 0.000484 | NM-K_not_in_group | 0.000642 |
| 0.00013  | NM-K_not_in_group | 0.000787 |
| 0.000024 | NM-K_not_in_group | 0.000336 |
| 0.000024 | NM-K_not_in_group | 0.000336 |



## diffusion\_prioritization\_ALL

|          |                   |          |
|----------|-------------------|----------|
| 0.000129 | NM-K_not_in_group | 0.000108 |
| 0.001165 | NM-K_not_in_group | 0.00226  |
| 0.001534 | NM-K_not_in_group | 0.001396 |
| 0.000483 | NM-K_not_in_group | 0.000124 |
| 0.000483 | NM-K_not_in_group | 0.000124 |
| 0.001145 | NM-K_not_in_group | 0.005422 |
| 1        | NM-K_not_in_group | 0.017896 |
| 0.057951 | NM-K_not_in_group | 0.017896 |
| 0.000122 | NM-K_not_in_group | 0.011444 |
| 0.000804 | NM-K_not_in_group | 0.002183 |
| 0.000804 | NM-K_not_in_group | 0.002183 |
| 0.000115 | NM-K_not_in_group | 0.000763 |
| 0.000655 | NM-K_not_in_group | 0.008175 |
| 0.000644 | NM-K_not_in_group | 0.006247 |
| 0.000644 | NM-K_not_in_group | 0.006247 |
| 0.000644 | NM-K_not_in_group | 0.006247 |
| 0.000405 | NM-K_not_in_group | 0.000499 |
| 0.000239 | NM-K_not_in_group | 0.002451 |
| 0.000239 | NM-K_not_in_group | 0.002451 |
| 0.00001  | NM-K_not_in_group | 0.000287 |
| 0.00001  | NM-K_not_in_group | 0.000287 |
| 0.00001  | NM-K_not_in_group | 0.000287 |
| 0.000246 | NM-K_not_in_group | 0.000446 |
| 0.000105 | NM-K_not_in_group | 0.001777 |
| 0.001858 | NM-K_not_in_group | 0.101244 |
| 0.001858 | NM-K_not_in_group | 0.101244 |
| 0.001022 | NM-K_not_in_group | 0.005368 |
| 0.000549 | NM-K_not_in_group | 0.000453 |









## diffusion\_prioritization\_ALL

|          |                   |          |
|----------|-------------------|----------|
| 0.000089 | NM-K_not_in_group | 0.00117  |
| 0.001425 | NM-K_not_in_group | 0.006111 |
| 0.000183 | NM-K_not_in_group | 0.002908 |
| 0.000397 | NM-K_not_in_group | 0.003084 |
| 0.000424 | NM-K_not_in_group | 0.000671 |
| 0.000205 | NM-K_not_in_group | 0.001217 |
| 0.001069 | NM-K_not_in_group | 0.018233 |
| 0.00144  | NM-K_not_in_group | 0.007401 |
| 0.002777 | NM-K_not_in_group | 0.001046 |
| 0.001924 | NM-K_not_in_group | 0.003162 |
| 0.001924 | NM-K_not_in_group | 0.003162 |
| 0.000123 | NM-K_not_in_group | 0.02401  |
| 0.004872 | NM-K_not_in_group | 0.001346 |
| 0.00112  | NM-K_not_in_group | 0.01106  |
| 0.000361 | NM-K_not_in_group | 0.000284 |
| 0.001213 | NM-K_not_in_group | 0.000996 |
| 0.010474 | NM-K_not_in_group | 0.001248 |
| 0.05053  | NM-K_not_in_group | 0.136708 |
| 0.001533 | NM-K_not_in_group | 0.001475 |
| 0.000048 | NM-K_not_in_group | 0.000295 |
| 0.000637 | NM-K_not_in_group | 0.000257 |
| 0.000035 | NM-K_not_in_group | 0.000013 |
| 0.000035 | NM-K_not_in_group | 0.000013 |
| 0.000354 | NM-K_not_in_group | 0.001334 |

## diffusion\_prioritization\_ALL

|          |                   |          |
|----------|-------------------|----------|
| 0.000354 | NM-K_not_in_group | 0.001334 |
| 0.000633 | NM-K_not_in_group | 0.005545 |
| 0.000504 | NM-K_not_in_group | 0.007563 |
| 0.000425 | NM-K_not_in_group | 0.000532 |
| 0.000749 | NM-K_not_in_group | 0.000512 |
| 0.004393 | NM-K_not_in_group | 0.00007  |
| 0.001832 | NM-K_not_in_group | 0.001582 |
| 0.000036 | NM-K_not_in_group | 0.007649 |
| 0.000013 | NM-K_not_in_group | 0.001504 |
| 0.001095 | NM-K_not_in_group | 0.004486 |
| 0.001329 | NM-K_not_in_group | 0.006832 |
| 0.001329 | NM-K_not_in_group | 0.006832 |
| 0.001329 | NM-K_not_in_group | 0.006832 |
| 0.001329 | NM-K_in_group     | 1        |
| 0.001329 | NM-K_not_in_group | 0.006832 |
| 0.000092 | NM-K_not_in_group | 0.000714 |
| 0.000101 | NM-K_not_in_group | 0.000569 |
| 0.000187 | NM-K_not_in_group | 0.00066  |
| 0.000064 | NM-K_not_in_group | 0.000689 |
| 0.000943 | NM-K_not_in_group | 0.000936 |
| 0.000119 | NM-K_not_in_group | 0.000303 |
| 0.001045 | NM-K_not_in_group | 0.008557 |
| 0.00046  | NM-K_not_in_group | 0.00038  |
| 0.00046  | NM-K_not_in_group | 0.00038  |
| 0.000043 | NM-K_not_in_group | 0.019765 |
| 0.000043 | NM-K_not_in_group | 0.019765 |
| 0.001755 | NM-K_not_in_group | 0.001516 |





diffusion\_prioritization\_ALL

|          |                   |          |
|----------|-------------------|----------|
| 0.000036 | NM-K_not_in_group | 0.000132 |
| 0.000442 | NM-K_not_in_group | 0.00029  |
| 0.003257 | NM-K_not_in_group | 0.000206 |
| 0.000384 | NM-K_not_in_group | 0.003912 |
| 0.000063 | NM-K_not_in_group | 0.00334  |
| 0.05762  | NM-K_not_in_group | 0.00051  |
| 0.000102 | NM-K_not_in_group | 0.00132  |
| 0.003209 | NM-K_not_in_group | 0.001024 |
| 0.003209 | NM-K_not_in_group | 0.001024 |
| 0.000409 | NM-K_not_in_group | 0.000349 |
| 0.000035 | NM-K_not_in_group | 0.000878 |
| 0.00015  | NM-K_not_in_group | 0.000558 |
| 0.000216 | NM-K_not_in_group | 0.000998 |
| 0.000299 | NM-K_not_in_group | 0.000323 |
| 0.000299 | NM-K_not_in_group | 0.000323 |





## diffusion\_prioritization\_ALL

|          |                   |          |
|----------|-------------------|----------|
| 0.000034 | NM-K_not_in_group | 0.000841 |
| 0.001148 | NM-K_not_in_group | 0.0059   |
| 0.000661 | NM-K_not_in_group | 0.028802 |
| 0.000661 | NM-K_in_group     | 1        |
| 0.000147 | NM-K_not_in_group | 0.000364 |
| 0.000147 | NM-K_not_in_group | 0.000364 |
| 0.000147 | NM-K_not_in_group | 0.000364 |
| 1        | NM-K_not_in_group | 0.000264 |
| 0.000032 | NM-K_not_in_group | 0.000104 |
| 0.000309 | NM-K_not_in_group | 0.00041  |
| 0.000055 | NM-K_not_in_group | 0.000372 |
| 0.000235 | NM-K_not_in_group | 0.066714 |
| 0.000114 | NM-K_not_in_group | 0.000893 |
| 0.00041  | NM-K_not_in_group | 0.007325 |
| 0.000081 | NM-K_not_in_group | 0.000106 |
| 0.000279 | NM-K_not_in_group | 0.003553 |
| 0.000774 | NM-K_not_in_group | 0.00022  |
| 0.000774 | NM-K_not_in_group | 0.00022  |
| 0.000774 | NM-K_not_in_group | 0.00022  |
| 0.000037 | NM-K_not_in_group | 0.015611 |
| 0.000617 | NM-K_not_in_group | 0.000438 |
| 0.000036 | NM-K_not_in_group | 0.010374 |



## diffusion\_prioritization\_ALL

|          |                   |          |
|----------|-------------------|----------|
| 0.000006 | NM-K_not_in_group | 0.000026 |
| 0.000636 | NM-K_not_in_group | 0.022228 |
| 0.000032 | NM-K_not_in_group | 0.000114 |
| 0.000066 | NM-K_not_in_group | 0.001136 |
| 0.000053 | NM-K_not_in_group | 0.000139 |
| 0.000053 | NM-K_not_in_group | 0.000139 |
| 0.000757 | NM-K_not_in_group | 0.000932 |
| 0.00034  | NM-K_not_in_group | 0.00025  |
| 0.00034  | NM-K_not_in_group | 0.00025  |
| 0.001385 | NM-K_not_in_group | 0.002276 |
| 0.000822 | NM-K_not_in_group | 0.011696 |
| 0.000414 | NM-K_not_in_group | 0.000459 |
| 0.000414 | NM-K_not_in_group | 0.000459 |
| 0.000414 | NM-K_not_in_group | 0.000459 |
| 0.000134 | NM-K_not_in_group | 0.000609 |
| 0.000026 | NM-K_not_in_group | 0.000581 |
| 0.000026 | NM-K_not_in_group | 0.000581 |
| 0.000026 | NM-K_not_in_group | 0.000581 |
| 0.000056 | NM-K_not_in_group | 0.001347 |
| 0.000056 | NM-K_not_in_group | 0.001347 |
| 0.000439 | NM-K_not_in_group | 0.005701 |
| 0.001186 | NM-K_not_in_group | 0.064624 |
| 0.00028  | NM-K_not_in_group | 0.003898 |
| 0.000045 | NM-K_not_in_group | 0.011664 |
| 0.000437 | NM-K_not_in_group | 0.006186 |
| 0.000437 | NM-K_not_in_group | 0.006186 |
| 0.000037 | NM-K_not_in_group | 0.000856 |
| 0.000033 | NM-K_not_in_group | 0.010588 |
| 0.000017 | NM-K_not_in_group | 0.000272 |
| 0.000648 | NM-K_not_in_group | 0.000222 |
| 0.000278 | NM-K_not_in_group | 0.000198 |
| 0.000283 | NM-K_not_in_group | 0.001601 |





## diffusion\_prioritization\_ALL

|          |                   |          |
|----------|-------------------|----------|
| 0.000115 | NM-K_not_in_group | 0.000759 |
| 0.000026 | NM-K_not_in_group | 0.095537 |
| 0.000649 | NM-K_not_in_group | 0.013994 |
| 0.000379 | NM-K_not_in_group | 0.004923 |
| 0.000073 | NM-K_not_in_group | 0.000641 |
| 0.00012  | NM-K_not_in_group | 0.000811 |
| 0.000675 | NM-K_not_in_group | 0.00014  |
| 0.00013  | NM-K_not_in_group | 0.000108 |
| 0.000848 | NM-K_not_in_group | 0.004361 |
| 0.000186 | NM-K_not_in_group | 0.000092 |
| 0.001417 | NM-K_not_in_group | 0.002837 |
| 0.001417 | NM-K_not_in_group | 0.002837 |
| 0.001417 | NM-K_not_in_group | 0.002837 |
| 0.000049 | NM-K_not_in_group | 0.003303 |
| 0.000556 | NM-K_not_in_group | 0.000723 |
| 0.000336 | NM-K_in_group     | 1        |
| 0.000336 | NM-K_not_in_group | 0.027813 |









diffusion\_prioritization\_ALL

|          |                   |          |
|----------|-------------------|----------|
| 0.000114 | NM-K_not_in_group | 0.000056 |
| 0.000136 | NM-K_not_in_group | 0.000628 |
| 0.157067 | NM-K_not_in_group | 0.000252 |
| 0.000549 | NM-K_not_in_group | 0.002717 |
| 0.000036 | NM-K_not_in_group | 0.000178 |
| 0.000036 | NM-K_not_in_group | 0.000178 |
| 0.000096 | NM-K_not_in_group | 0.000168 |
| 0.000155 | NM-K_not_in_group | 0.001192 |
| 0.000155 | NM-K_not_in_group | 0.001192 |
| 0.000509 | NM-K_not_in_group | 0.001226 |
| 0.000706 | NM-K_not_in_group | 0.003628 |
| 0.000284 | NM-K_not_in_group | 0.020372 |
| 0.000835 | NM-K_not_in_group | 0.000859 |
| 0.000156 | NM-K_not_in_group | 0.000077 |
| 0.000049 | NM-K_not_in_group | 0.000171 |
| 0.000318 | NM-K_not_in_group | 0.001382 |
| 0.000318 | NM-K_not_in_group | 0.001382 |
| 0.000318 | NM-K_not_in_group | 0.001382 |
| 0.000057 | NM-K_not_in_group | 0.000133 |
| 0.000494 | NM-K_not_in_group | 0.00014  |

## diffusion\_prioritization\_ALL

|          |                   |          |
|----------|-------------------|----------|
| 0.000494 | NM-K_not_in_group | 0.00014  |
| 0.000084 | NM-K_not_in_group | 0.00021  |
| 0.000023 | NM-K_not_in_group | 0.006622 |
| 0.000046 | NM-K_not_in_group | 0.000503 |
| 0.000034 | NM-K_not_in_group | 0.000164 |
| 0.000102 | NM-K_not_in_group | 0.00005  |
| 0.000644 | NM-K_not_in_group | 0.003056 |
| 0.000331 | NM-K_not_in_group | 0.000658 |
| 0.000253 | NM-K_not_in_group | 0.000854 |
| 0.000563 | NM-K_not_in_group | 0.003622 |
| 0.000349 | NM-K_not_in_group | 0.006933 |
| 0.000205 | NM-K_not_in_group | 0.000256 |
| 0.000205 | NM-K_not_in_group | 0.000256 |
| 0.000469 | NM-K_not_in_group | 0.010049 |
| 0.000469 | NM-K_not_in_group | 0.010049 |
| 0.000028 | NM-K_not_in_group | 0.002438 |
| 0.002314 | NM-K_not_in_group | 0.000817 |
| 0.000179 | NM-K_not_in_group | 0.004442 |
| 0.002395 | NM-K_not_in_group | 0.000751 |
| 0.000542 | NM-K_not_in_group | 0.003484 |
| 0.000322 | NM-K_not_in_group | 0.001836 |
| 0.000042 | NM-K_not_in_group | 0.000717 |
| 0.00047  | NM-K_not_in_group | 0.01013  |
| 0.000115 | NM-K_not_in_group | 0.000158 |
| 0.000039 | NM-K_not_in_group | 0.00067  |
| 0.000216 | NM-K_not_in_group | 0.000353 |
| 0.00004  | NM-K_not_in_group | 0.000452 |
| 0.000086 | NM-K_not_in_group | 0.00018  |

## diffusion\_prioritization\_ALL

|          |                   |          |
|----------|-------------------|----------|
| 0.000446 | NM-K_not_in_group | 0.000062 |
| 0.00003  | NM-K_not_in_group | 0.001607 |
| 0.000039 | NM-K_not_in_group | 0.000662 |
| 0.000039 | NM-K_not_in_group | 0.000662 |
| 0.000039 | NM-K_not_in_group | 0.000662 |
| 0.000047 | NM-K_not_in_group | 0.000109 |
| 0.000056 | NM-K_not_in_group | 0.000174 |
| 0.000763 | NM-K_not_in_group | 0.000659 |
| 0.000763 | NM-K_not_in_group | 0.000659 |
| 0.000763 | NM-K_not_in_group | 0.000659 |
| 0.000406 | NM-K_not_in_group | 0.000403 |
| 0.000406 | NM-K_not_in_group | 0.000403 |
| 0.000416 | NM-K_not_in_group | 0.00709  |
| 0.000033 | NM-K_not_in_group | 0.000059 |
| 0.000085 | NM-K_not_in_group | 0.032785 |
| 0.000085 | NM-K_not_in_group | 0.032785 |
| 0.000085 | NM-K_in_group     | 1        |
| 0.000085 | NM-K_not_in_group | 0.032785 |
| 0.047248 | NM-K_not_in_group | 0.078689 |
| 0.000007 | NM-K_not_in_group | 0.00002  |
| 0.000068 | NM-K_not_in_group | 0.001084 |
| 0.000046 | NM-K_not_in_group | 0.000406 |
| 0.000082 | NM-K_not_in_group | 0.000158 |
| 0.000161 | NM-K_not_in_group | 0.000184 |
| 0.000161 | NM-K_not_in_group | 0.000184 |
| 0.000161 | NM-K_not_in_group | 0.000184 |
| 0.000606 | NM-K_not_in_group | 0.000753 |





diffusion\_prioritization\_ALL

|          |                   |          |
|----------|-------------------|----------|
| 0.000148 | NM-K_not_in_group | 0.00527  |
| 0.001309 | NM-K_not_in_group | 0.000903 |
| 0.000398 | NM-K_not_in_group | 0.000082 |
| 0.000288 | NM-K_not_in_group | 0.001725 |
| 0.023837 | NM-K_not_in_group | 0.000211 |
| 0.000015 | NM-K_not_in_group | 0.000366 |
| 0.000015 | NM-K_not_in_group | 0.000366 |
| 0.000015 | NM-K_not_in_group | 0.000366 |
| 0.000065 | NM-K_not_in_group | 0.00016  |
| 0.042017 | NM-K_not_in_group | 0.155377 |
| 0.000364 | NM-K_not_in_group | 0.006214 |
| 0.000071 | NM-K_not_in_group | 0.000149 |
| 0.000064 | NM-K_not_in_group | 0.000293 |
| 0.000064 | NM-K_not_in_group | 0.000293 |
| 0.00007  | NM-K_not_in_group | 0.006832 |
| 0.000308 | NM-K_not_in_group | 0.001301 |
| 0.000263 | NM-K_not_in_group | 0.007087 |
| 0.017191 | NM-K_not_in_group | 0.046509 |
| 0.017191 | NM-K_not_in_group | 0.046509 |
| 0.017191 | NM-K_in_group     | 1        |
| 0.017191 | NM-K_not_in_group | 0.046509 |
| 0.000139 | NM-K_not_in_group | 0.00036  |
| 0.000291 | NM-K_not_in_group | 0.001242 |
| 0.000291 | NM-K_not_in_group | 0.001242 |
| 0.000087 | NM-K_not_in_group | 0.000401 |
| 0.000072 | NM-K_not_in_group | 0.000036 |
| 0.000317 | NM-K_not_in_group | 0.000592 |
| 0.000069 | NM-K_not_in_group | 0.000143 |
| 0.000377 | NM-K_not_in_group | 0.000183 |
| 0.000312 | NM-K_not_in_group | 0.000107 |









## diffusion\_prioritization\_ALL

|          |                   |          |
|----------|-------------------|----------|
| 0.000009 | NM-K_not_in_group | 0.00184  |
| 0.000036 | NM-K_not_in_group | 0.000077 |
| 0.000036 | NM-K_not_in_group | 0.000077 |
| 0.000036 | NM-K_not_in_group | 0.000077 |
| 0.000017 | NM-K_not_in_group | 0.000259 |
| 0.000017 | NM-K_not_in_group | 0.000259 |
| 0.000017 | NM-K_not_in_group | 0.000259 |
| 0.000045 | NM-K_not_in_group | 0.000302 |
| 0.000045 | NM-K_not_in_group | 0.000302 |
| 0.000045 | NM-K_not_in_group | 0.000302 |
| 0.00019  | NM-K_not_in_group | 0.120044 |
| 0.000011 | NM-K_not_in_group | 0.004599 |
| 0.000145 | NM-K_not_in_group | 0.000315 |
| 0.026819 | NM-K_not_in_group | 0.249625 |
| 0.000029 | NM-K_not_in_group | 0.000058 |
| 0.000014 | NM-K_not_in_group | 0.003674 |
| 0.000026 | NM-K_not_in_group | 0.000059 |
| 0.000038 | NM-K_not_in_group | 0.000094 |
| 0.000195 | NM-K_not_in_group | 0.000824 |
| 0.000226 | NM-K_not_in_group | 0.000108 |
| 0.000294 | NM-K_not_in_group | 0.001512 |
| 0.000294 | NM-K_not_in_group | 0.001512 |
| 0.000294 | NM-K_not_in_group | 0.001512 |
| 0.000102 | NM-K_not_in_group | 0.000085 |
| 0.00001  | NM-K_not_in_group | 0.002805 |
| 0.000221 | NM-K_not_in_group | 0.002467 |
| 0.000244 | NM-K_not_in_group | 0.001572 |
| 0.00001  | NM-K_not_in_group | 0.002757 |
| 0.000211 | NM-K_not_in_group | 0.004467 |



## diffusion\_prioritization\_ALL

|          |                   |          |
|----------|-------------------|----------|
| 0.000039 | NM-K_not_in_group | 0.000064 |
| 0.000034 | NM-K_not_in_group | 0.000071 |
| 0.000173 | NM-K_not_in_group | 0.002954 |
| 0.000173 | NM-K_not_in_group | 0.002954 |
| 0.000173 | NM-K_not_in_group | 0.002954 |
| 0.000068 | NM-K_not_in_group | 0.006771 |
| 0.010754 | NM-K_not_in_group | 0.000095 |
| 0.000219 | NM-K_not_in_group | 0.00104  |
| 0.000097 | NM-K_not_in_group | 0.001261 |
| 0.000097 | NM-K_not_in_group | 0.001261 |
| 0.000097 | NM-K_not_in_group | 0.001261 |
| 0.000032 | NM-K_not_in_group | 0.000054 |
| 0.000032 | NM-K_not_in_group | 0.000054 |
| 0.007816 | NM-K_not_in_group | 0.021146 |
| 0.000013 | NM-K_not_in_group | 0.000861 |
| 0.000004 | NM-K_not_in_group | 0.000059 |
| 0.000032 | NM-K_not_in_group | 0.000439 |
| 0.000368 | NM-K_not_in_group | 0.000251 |
| 0.000152 | NM-K_not_in_group | 0.002589 |
| 0.000152 | NM-K_not_in_group | 0.002589 |
| 0.000031 | NM-K_not_in_group | 0.000015 |
| 0.000031 | NM-K_not_in_group | 0.000015 |
| 0.000012 | NM-K_not_in_group | 0.000795 |

## diffusion\_prioritization\_ALL

|          |                   |          |
|----------|-------------------|----------|
| 0.000127 | NM-K_not_in_group | 0.000538 |
| 0.000111 | NM-K_not_in_group | 0.000115 |
| 0.000111 | NM-K_not_in_group | 0.000115 |
| 0.00001  | NM-K_not_in_group | 0.000126 |
| 0.000319 | NM-K_not_in_group | 0.001008 |
| 0.000031 | NM-K_not_in_group | 0.000051 |
| 0.000307 | NM-K_not_in_group | 0.000023 |
| 0.015804 | NM-K_in_group     | 1        |
| 0.000066 | NM-K_not_in_group | 0.000997 |
| 0.000005 | NM-K_not_in_group | 0.019903 |







## diffusion\_prioritization\_ALL

|          |                   |          |
|----------|-------------------|----------|
| 0.000065 | NM-K_not_in_group | 0.001292 |
| 0.000461 | NM-K_not_in_group | 0.000144 |
| 0.000461 | NM-K_not_in_group | 0.000144 |
| 0.000461 | NM-K_not_in_group | 0.000144 |
| 0.000086 | NM-K_not_in_group | 0.000207 |
| 0.000086 | NM-K_not_in_group | 0.000207 |
| 0.000045 | NM-K_not_in_group | 0.000152 |
| 0.00001  | NM-K_not_in_group | 0.000022 |
| 0.00001  | NM-K_not_in_group | 0.000022 |
| 0.00001  | NM-K_not_in_group | 0.000022 |
| 0.000041 | NM-K_not_in_group | 0.000613 |
| 0.000079 | NM-K_not_in_group | 0.000191 |
| 0.000042 | NM-K_not_in_group | 0.000141 |
| 0.000059 | NM-K_not_in_group | 0.001164 |
| 0.000417 | NM-K_not_in_group | 0.000131 |
| 0.000175 | NM-K_not_in_group | 0.000013 |
| 0.000081 | NM-K_not_in_group | 0.001375 |
| 0.000056 | NM-K_not_in_group | 0.001116 |
| 0.000016 | NM-K_not_in_group | 0.000027 |
| 0.000012 | NM-K_not_in_group | 0.00003  |
| 0.000052 | NM-K_not_in_group | 0.001528 |
| 0.000014 | NM-K_not_in_group | 0.00003  |
| 0.003501 | NM-K_not_in_group | 0.009472 |
| 0.000071 | NM-K_not_in_group | 0.000034 |

## diffusion\_prioritization\_ALL

|          |                   |          |
|----------|-------------------|----------|
| 0.004341 | NM-K_not_in_group | 0.000038 |
| 0.003257 | NM-K_not_in_group | 0.008811 |
| 0.003257 | NM-K_not_in_group | 0.008811 |
| 0.000054 | NM-K_in_group     | 1        |
| 0.000066 | NM-K_not_in_group | 0.001407 |
| 0.000065 | NM-K_not_in_group | 0.000183 |
| 0.004008 | NM-K_not_in_group | 0.000035 |
| 0.004008 | NM-K_not_in_group | 0.000035 |
| 0.004008 | NM-K_not_in_group | 0.000035 |
| 0.00005  | NM-K_not_in_group | 0.031634 |
| 0.000062 | NM-K_not_in_group | 0.001154 |
| 0.000012 | NM-K_not_in_group | 0.000164 |
| 0.000058 | NM-K_not_in_group | 0.000604 |
| 0.000054 | NM-K_not_in_group | 0.001152 |
| 0.00005  | NM-K_not_in_group | 0.000122 |
| 0.00005  | NM-K_not_in_group | 0.000122 |
| 0.000037 | NM-K_not_in_group | 0.000738 |
| 0.000111 | NM-K_not_in_group | 0.000008 |
| 0.000006 | NM-K_not_in_group | 0.000012 |
| 0.000025 | NM-K_not_in_group | 0.000083 |
| 0.000034 | NM-K_not_in_group | 0.000686 |
| 0.000024 | NM-K_not_in_group | 0.000361 |
| 0.000024 | NM-K_not_in_group | 0.000081 |
| 0.002558 | NM-K_not_in_group | 0.000023 |
| 0.000201 | NM-K_not_in_group | 0.000063 |
| 0.000002 | NM-K_not_in_group | 0.00051  |
| 0.000005 | NM-K_not_in_group | 0.00001  |
| 0.000002 | NM-K_not_in_group | 0.00051  |
| 0.000002 | NM-K_not_in_group | 0.00051  |
| 0.000002 | NM-K_not_in_group | 0.00051  |



## diffusion\_prioritization\_ALL

|          |                   |          |
|----------|-------------------|----------|
| 0.001684 | NM-K_not_in_group | 0.004557 |
| 0.001684 | NM-K_not_in_group | 0.004557 |
| 0.000034 | NM-K_not_in_group | 0.000573 |
| 0.000034 | NM-K_not_in_group | 0.000573 |
| 0.000034 | NM-K_not_in_group | 0.000573 |
| 0.000006 | NM-K_not_in_group | 0.000013 |
| 0.000026 | NM-K_not_in_group | 0.165677 |
| 0.000026 | NM-K_not_in_group | 0.165677 |
| 0.000001 | NM-K_not_in_group | 0.000411 |
| 0.000066 | NM-K_not_in_group | 0.000005 |
| 0.000015 | NM-K_not_in_group | 0.000051 |
| 0.000018 | NM-K_not_in_group | 0.000355 |
| 0.000018 | NM-K_not_in_group | 0.000355 |
| 0.000006 | NM-K_not_in_group | 0.000009 |
| 0.000024 | NM-K_not_in_group | 0.000516 |
| 0.000024 | NM-K_not_in_group | 0.000516 |
| 0.000005 | NM-K_not_in_group | 0.000008 |
| 0.000023 | NM-K_not_in_group | 0.00048  |
| 0.000015 | NM-K_not_in_group | 0.00045  |
| 0.000021 | NM-K_not_in_group | 0.000225 |
| 0.000021 | NM-K_not_in_group | 0.000225 |
| 0.000021 | NM-K_not_in_group | 0.000225 |
| 0.000014 | NM-K_not_in_group | 0.000286 |
| 0.000014 | NM-K_not_in_group | 0.000286 |
| 0.000014 | NM-K_not_in_group | 0.000286 |
| 0.000102 | NM-K_not_in_group | 0.000032 |
| 0.000002 | NM-K_not_in_group | 0.000005 |
| 0.000004 | NM-K_not_in_group | 0.000008 |
| 0.000094 | NM-K_not_in_group | 0.00003  |
| 0.000009 | NM-K_not_in_group | 0.000031 |
| 0.000012 | NM-K_not_in_group | 0.001618 |
| 0.000001 | NM-K_not_in_group | 0.000226 |
| 0.000003 | NM-K_not_in_group | 0.000005 |
| 0.000007 | NM-K_not_in_group | 0.000025 |
| 0.000007 | NM-K_not_in_group | 0.000025 |
| 0.000012 | NM-K_not_in_group | 0.000248 |

diffusion\_prioritization\_ALL

|          |                   |          |
|----------|-------------------|----------|
| 0.00006  | NM-K_not_in_group | 0.000019 |
| 0.000006 | NM-K_not_in_group | 0.000843 |
| 0.000005 | NM-K_not_in_group | 0.004454 |
| 0.000001 | NM-K_not_in_group | 0.000003 |
| 0.000001 | NM-K_not_in_group | 0.000002 |
| 0.000004 | NM-K_not_in_group | 0.000497 |
| 0        | NM-K_not_in_group | 0.000071 |
| 0.000002 | NM-K_not_in_group | 0.001856 |
| 0.000002 | NM-K_not_in_group | 0.001856 |
| 0        | NM-K_not_in_group | 0.000001 |
| 0        | NM-K_not_in_group | 0.000001 |
| 0.000002 | NM-K_not_in_group | 0.008547 |
| 0.000001 | NM-K_not_in_group | 0.027453 |
| 0        | NM-K_not_in_group | 0        |
| 0        | NM-K_not_in_group | 0.010231 |
| 0        | NM-K_not_in_group | 0.010231 |
| 0        | NM-K_not_in_group | 0.052223 |
| 0        | NM-K_not_in_group | 0.010231 |
| 0        | NM-K_not_in_group | 0.170719 |
| 0        | NM-K_not_in_group | 0        |
| 0        | NM-K_not_in_group | 0        |
| 0        | NM-K_not_in_group | 0        |
| 0        | NM-K_not_in_group | 0.063623 |
| 0        | NM-K_not_in_group | 0        |
| 0        | NM-K_in_group     | 1        |
| 0        | NM-K_not_in_group | 0        |
| 0        | NM-K_in_group     | 1        |
| 0        | NM-K_not_in_group | 0        |

diffusion\_prioritization\_ALL

|          |                   |          |
|----------|-------------------|----------|
| 0        | NM-K_not_in_group | 0        |
| 0.162057 | NM-K_not_in_group | 0        |
| 0        | NM-K_in_group     | 1        |
| 0        | NM-K_not_in_group | 0        |
| 0        | NM-K_in_group     | 1        |
| 0        | NM-K_not_in_group | 0        |
| 0        | NM-K_not_in_group | 0.261589 |
| 0        | NM-K_not_in_group | 0        |
| 0        | NM-K_not_in_group | 0.321412 |
| 0        | NM-K_not_in_group | 0        |
| 0        | NM-K_not_in_group | 0        |

diffusion\_prioritization\_ALL

|          |                   |          |
|----------|-------------------|----------|
| 0        | NM-K_not_in_group | 0        |
| 0        | NM-K_not_in_group | 0.454545 |
| 0        | NM-K_not_in_group | 0        |
| 0        | NM-K_not_in_group | 0.454545 |
| 0        | NM-K_not_in_group | 0        |
| 0        | NM-K_not_in_group | 0        |
| 0        | NM-K_not_in_group | 0        |
| 1        | NM-K_not_in_group | 0        |
| 0        | NM-K_not_in_group | 0.063131 |
| 0        | NM-K_not_in_group | 0        |
| 0.095493 | NM-K_not_in_group | 0        |
| 0        | NM-K_not_in_group | 0        |















diffusion\_prioritization\_ALL

|          |                   |          |
|----------|-------------------|----------|
| 0        | NM-K_not_in_group | 0        |
| 0        | NM-K_not_in_group | 0.510806 |
| 0        | NM-K_not_in_group | 0        |
| 0        | NM-K_in_group     | 1        |
| 0        | NM-K_not_in_group | 0        |
| 0.253889 | NM-K_not_in_group | 0        |
| 0        | NM-K_in_group     | 1        |
| 0        | NM-K_not_in_group | 0        |
| 0        | NM-K_in_group     | 1        |
| 0        | NM-K_not_in_group | 0        |









## diffusion\_prioritization\_ALL

|          |                   |          |
|----------|-------------------|----------|
| 0.00056  | NM-K_not_in_group | 0.002253 |
| 0.011283 | NM-K_not_in_group | 0.000485 |
| 0.000641 | NM-K_not_in_group | 0.068716 |
| 0.01482  | NM-K_not_in_group | 0.00139  |
| 0.01482  | NM-K_not_in_group | 0.00139  |
| 0.001139 | NM-K_not_in_group | 0.001589 |
| 0.135113 | NM-K_not_in_group | 0.212662 |
| 0.000028 | NM-K_not_in_group | 0.000121 |
| 0.000501 | NM-K_not_in_group | 0.00153  |
| 0.002384 | NM-K_not_in_group | 0.003793 |
| 0.009912 | NM-K_not_in_group | 0.137334 |
| 0.000722 | NM-K_not_in_group | 0.004649 |
| 0.000722 | NM-K_not_in_group | 0.004649 |
| 0.000948 | NM-K_not_in_group | 0.002114 |
| 0.002769 | NM-K_not_in_group | 0.014614 |
| 0.028692 | NM-K_not_in_group | 0.014904 |
| 0.019477 | NM-K_not_in_group | 0.000851 |
| 0.020923 | NM-K_not_in_group | 0.011497 |
| 0.022973 | NM-K_not_in_group | 0.012643 |
| 0.001917 | NM-K_not_in_group | 0.070292 |
| 0.010087 | NM-K_not_in_group | 0.000366 |
| 0.015102 | NM-K_not_in_group | 0.010737 |
| 0.015102 | NM-K_not_in_group | 0.010737 |
| 0.084357 | NM-K_not_in_group | 0.07788  |
| 0.037444 | NM-K_not_in_group | 0.063415 |
| 0.037444 | NM-K_not_in_group | 0.063415 |
| 0.022748 | NM-K_not_in_group | 0.00376  |
| 0.024462 | NM-K_not_in_group | 0.010662 |
| 0.024462 | NM-K_not_in_group | 0.010662 |
| 0.023332 | NM-K_not_in_group | 0.000671 |
| 0.018585 | NM-K_not_in_group | 0.001509 |
| 0.008052 | NM-K_not_in_group | 0.005133 |
| 0.004948 | NM-K_not_in_group | 0.003615 |
| 0.009902 | NM-K_not_in_group | 0.009087 |
| 0.048437 | NM-K_not_in_group | 0.00973  |
| 0.055423 | NM-K_not_in_group | 0.002214 |
| 0.018506 | NM-K_not_in_group | 0.025623 |
| 0.001804 | NM-K_not_in_group | 0.117341 |
| 0.003894 | NM-K_not_in_group | 0.004428 |
| 0.005022 | NM-K_not_in_group | 0.006992 |
| 0.014123 | NM-K_not_in_group | 0.00821  |
| 0.008839 | NM-K_not_in_group | 0.004647 |
| 0.003878 | NM-K_not_in_group | 0.008498 |
| 0.007203 | NM-K_not_in_group | 0.039338 |
| 0.007503 | NM-K_not_in_group | 0.003944 |
| 0.000238 | NM-K_not_in_group | 0.000633 |
| 0.018253 | NM-K_not_in_group | 0.080531 |
| 0.02177  | NM-K_not_in_group | 0.000844 |
| 0.000101 | NM-K_not_in_group | 0.002362 |
| 0.019854 | NM-K_not_in_group | 0.035377 |
| 0.003847 | NM-K_not_in_group | 0.154139 |

## diffusion\_prioritization\_ALL

|          |                   |          |
|----------|-------------------|----------|
| 0.001738 | NM-K_not_in_group | 0.00828  |
| 0.001847 | NM-K_not_in_group | 0.009088 |
| 0.001743 | NM-K_not_in_group | 0.001027 |
| 0.001201 | NM-K_not_in_group | 0.003236 |
| 0.001201 | NM-K_not_in_group | 0.003236 |
| 0.001247 | NM-K_not_in_group | 0.000611 |
| 0.169586 | NM-K_not_in_group | 0.00081  |
| 0.002951 | NM-K_not_in_group | 0.001464 |
| 0.002951 | NM-K_not_in_group | 0.001464 |
| 0.002951 | NM-K_not_in_group | 0.001464 |
| 0.003194 | NM-K_not_in_group | 0.016018 |
| 0.015658 | NM-K_not_in_group | 0.013525 |
| 0.093108 | NM-K_not_in_group | 0.029267 |
| 0.014097 | NM-K_not_in_group | 0.000107 |
| 0.002062 | NM-K_not_in_group | 0.081883 |
| 0.002062 | NM-K_not_in_group | 0.081883 |
| 0.003892 | NM-K_not_in_group | 0.021544 |
| 0.061868 | NM-K_not_in_group | 0.004076 |
| 0.005136 | NM-K_not_in_group | 0.003347 |
| 0.03784  | NM-K_not_in_group | 0.00202  |
| 0.03784  | NM-K_not_in_group | 0.00202  |
| 0.00019  | NM-K_not_in_group | 0.002297 |
| 0.162507 | NM-K_not_in_group | 0.019427 |
| 0.00926  | NM-K_not_in_group | 0.00186  |
| 0.00926  | NM-K_not_in_group | 0.00186  |
| 0.00926  | NM-K_not_in_group | 0.00186  |
| 0.00067  | NM-K_not_in_group | 0.000852 |
| 0.128526 | NM-K_not_in_group | 0.038233 |
| 0.000516 | NM-K_not_in_group | 0.010335 |
| 0.000903 | NM-K_not_in_group | 0.000423 |
| 0.01443  | NM-K_not_in_group | 0.002577 |
| 0.088064 | NM-K_not_in_group | 0.001575 |
| 0.040792 | NM-K_not_in_group | 0.002221 |
| 0.040792 | NM-K_not_in_group | 0.002221 |
| 0.036704 | NM-K_not_in_group | 0.031541 |
| 0.036704 | NM-K_not_in_group | 0.031541 |
| 0.000591 | NM-K_not_in_group | 0.000664 |
| 0.000591 | NM-K_not_in_group | 0.000664 |
| 0.001919 | NM-K_not_in_group | 0.001009 |
| 0.006857 | NM-K_not_in_group | 0.000266 |
| 0.017575 | NM-K_not_in_group | 0.002494 |
| 0.109009 | NM-K_not_in_group | 0.111338 |
| 0.002729 | NM-K_not_in_group | 0.001175 |
| 0.022254 | NM-K_not_in_group | 0.000327 |
| 0.002911 | NM-K_not_in_group | 0.004021 |

## diffusion\_prioritization\_ALL

|          |                   |          |
|----------|-------------------|----------|
| 0.001881 | NM-K_not_in_group | 0.001197 |
| 0.001618 | NM-K_not_in_group | 0.012668 |
| 0.01353  | NM-K_not_in_group | 0.072164 |
| 0.000339 | NM-K_not_in_group | 0.006232 |
| 0.070827 | NM-K_not_in_group | 0.010097 |
| 0.000464 | NM-K_not_in_group | 0.002283 |
| 0.000464 | NM-K_not_in_group | 0.002283 |
| 0.012509 | NM-K_not_in_group | 0.013067 |
| 0.00033  | NM-K_not_in_group | 0.00222  |
| 0.000402 | NM-K_not_in_group | 0.001914 |
| 0.000402 | NM-K_not_in_group | 0.001914 |
| 0.057883 | NM-K_not_in_group | 0.0134   |
| 0.048853 | NM-K_not_in_group | 0.048963 |
| 0.004797 | NM-K_not_in_group | 0.009668 |
| 0.003472 | NM-K_not_in_group | 0.013241 |
| 0.076294 | NM-K_not_in_group | 0.003138 |
| 0.076294 | NM-K_not_in_group | 0.003138 |
| 0.006153 | NM-K_not_in_group | 0.074878 |
| 0.016975 | NM-K_not_in_group | 0.00464  |
| 0.016975 | NM-K_not_in_group | 0.00464  |
| 0.000183 | NM-K_not_in_group | 0.008691 |
| 0.001131 | NM-K_not_in_group | 0.000595 |
| 0.000374 | NM-K_not_in_group | 0.001688 |
| 0.061214 | NM-K_not_in_group | 0.003462 |
| 0.14935  | NM-K_not_in_group | 0.001409 |
| 0.000828 | NM-K_not_in_group | 0.012151 |
| 0.012928 | NM-K_not_in_group | 0.019386 |
| 0.000846 | NM-K_not_in_group | 0.012157 |
| 0.000632 | NM-K_not_in_group | 0.004865 |
| 0.014307 | NM-K_not_in_group | 0.000594 |
| 0.001491 | NM-K_not_in_group | 0.001045 |
| 0.000655 | NM-K_not_in_group | 0.006178 |
| 0.010707 | NM-K_not_in_group | 0.000157 |
| 0.002775 | NM-K_not_in_group | 0.000022 |
| 0.007004 | NM-K_not_in_group | 0.011511 |
| 0.041858 | NM-K_not_in_group | 0.043386 |
| 0.008481 | NM-K_not_in_group | 0.007427 |
| 0.001494 | NM-K_not_in_group | 0.005382 |
| 0.000073 | NM-K_not_in_group | 0.000067 |
| 0.003993 | NM-K_not_in_group | 0.002369 |
| 0.00182  | NM-K_not_in_group | 0.049058 |
| 0.016913 | NM-K_not_in_group | 0.088684 |
| 0.001884 | NM-K_not_in_group | 0.006243 |
| 0.003362 | NM-K_not_in_group | 0.017875 |
| 0.007069 | NM-K_not_in_group | 0.000776 |
| 0.0014   | NM-K_not_in_group | 0.003032 |
| 0.0014   | NM-K_not_in_group | 0.003032 |
| 0.002259 | NM-K_not_in_group | 0.003279 |

diffusion\_prioritization\_ALL

|          |                   |          |
|----------|-------------------|----------|
| 0.000992 | NM-K_not_in_group | 0.004036 |
| 0.001723 | NM-K_not_in_group | 0.048345 |
| 0.004244 | NM-K_not_in_group | 0.013022 |
| 0.02682  | NM-K_not_in_group | 0.02144  |
| 0.017363 | NM-K_not_in_group | 0.090096 |
| 0.017422 | NM-K_not_in_group | 0.084636 |
| 0.017968 | NM-K_not_in_group | 0.082777 |
| 0.000465 | NM-K_not_in_group | 0.009975 |
| 0.003596 | NM-K_not_in_group | 0.015443 |
| 0.00043  | NM-K_not_in_group | 0.001989 |
| 0.000561 | NM-K_not_in_group | 0.000357 |
| 0.000561 | NM-K_not_in_group | 0.000357 |
| 0.000065 | NM-K_not_in_group | 0.001453 |
| 0.000065 | NM-K_not_in_group | 0.001453 |
| 0.001213 | NM-K_not_in_group | 0.018833 |
| 0.113523 | NM-K_not_in_group | 0.024633 |
| 0.113523 | NM-K_not_in_group | 0.024633 |
| 0.000122 | NM-K_not_in_group | 0.000582 |
| 0.002943 | NM-K_not_in_group | 0.012452 |
| 0.001646 | NM-K_not_in_group | 0.006348 |
| 0.011276 | NM-K_not_in_group | 0.003407 |
| 0.026224 | NM-K_not_in_group | 0.026784 |
| 0.000295 | NM-K_not_in_group | 0.005794 |
| 0.000295 | NM-K_not_in_group | 0.005794 |
| 0.001542 | NM-K_not_in_group | 0.153903 |
| 0.000476 | NM-K_not_in_group | 0.007485 |
| 0.00739  | NM-K_not_in_group | 0.002943 |
| 0.00104  | NM-K_not_in_group | 0.012861 |
| 0.001842 | NM-K_not_in_group | 0.000666 |
| 0.000077 | NM-K_not_in_group | 0.0001   |
| 0.00039  | NM-K_not_in_group | 0.001558 |
| 0.019808 | NM-K_not_in_group | 0.00216  |
| 0.021046 | NM-K_not_in_group | 0.172575 |
| 0.000073 | NM-K_not_in_group | 0.008343 |
| 0.000073 | NM-K_not_in_group | 0.008343 |
| 0.000294 | NM-K_not_in_group | 0.003873 |
| 0.000294 | NM-K_not_in_group | 0.003873 |
| 0.000017 | NM-K_not_in_group | 0.00013  |
| 0.001227 | NM-K_not_in_group | 0.014938 |
| 0.001516 | NM-K_not_in_group | 0.005813 |
| 0.001293 | NM-K_not_in_group | 0.000421 |
| 0.002116 | NM-K_not_in_group | 0.006131 |
| 0.001176 | NM-K_not_in_group | 0.014315 |
| 0.005098 | NM-K_not_in_group | 0.002455 |

## diffusion\_prioritization\_ALL

|          |                   |          |
|----------|-------------------|----------|
| 0.005098 | NM-K_not_in_group | 0.002455 |
| 0.000045 | NM-K_not_in_group | 0.00684  |
| 0.000393 | NM-K_not_in_group | 0.006236 |
| 0.001619 | NM-K_not_in_group | 0.004159 |
| 0.00021  | NM-K_not_in_group | 0.025453 |
| 0.00021  | NM-K_not_in_group | 0.025453 |
| 0.001452 | NM-K_not_in_group | 0.017858 |
| 0.002098 | NM-K_not_in_group | 0.000307 |
| 0.022797 | NM-K_not_in_group | 0.001724 |
| 0.010942 | NM-K_not_in_group | 0.002508 |
| 0.005166 | NM-K_not_in_group | 0.001005 |
| 0.004888 | NM-K_not_in_group | 0.001909 |
| 0.013383 | NM-K_not_in_group | 0.005796 |
| 0.000608 | NM-K_not_in_group | 0.008439 |
| 0.00187  | NM-K_not_in_group | 0.010778 |
| 0.000014 | NM-K_not_in_group | 0.000226 |
| 0.000388 | NM-K_not_in_group | 0.005997 |
| 0.020891 | NM-K_not_in_group | 0.00074  |
| 0.002032 | NM-K_not_in_group | 0.003964 |
| 0.00664  | NM-K_not_in_group | 0.02727  |
| 0.000153 | NM-K_not_in_group | 0.000211 |
| 0.012738 | NM-K_not_in_group | 0.058019 |
| 0.000095 | NM-K_not_in_group | 0.000502 |
| 0.000614 | NM-K_not_in_group | 0.000637 |
| 0.038928 | NM-K_not_in_group | 0.001628 |
| 0.003613 | NM-K_not_in_group | 0.002169 |
| 0.002362 | NM-K_not_in_group | 0.000459 |
| 0.008296 | NM-K_not_in_group | 0.002996 |
| 0.016699 | NM-K_not_in_group | 0.000086 |
| 0.000112 | NM-K_not_in_group | 0.002003 |
| 0.000269 | NM-K_not_in_group | 0.00542  |
| 0.016699 | NM-K_not_in_group | 0.000086 |
| 0.000537 | NM-K_not_in_group | 0.008474 |
| 0.145881 | NM-K_not_in_group | 0.000097 |
| 0.000301 | NM-K_not_in_group | 0.000197 |
| 0.136375 | NM-K_not_in_group | 0.00054  |
| 0.002622 | NM-K_not_in_group | 0.142005 |
| 0.003219 | NM-K_not_in_group | 0.001394 |
| 0.000093 | NM-K_not_in_group | 0.000423 |
| 0.000118 | NM-K_not_in_group | 0.001639 |
| 0.000573 | NM-K_not_in_group | 0.001164 |
| 0.003869 | NM-K_not_in_group | 0.000137 |
| 0.000024 | NM-K_not_in_group | 0.000127 |
| 0.060784 | NM-K_not_in_group | 0.00004  |
| 0.001262 | NM-K_not_in_group | 0.000037 |

diffusion\_prioritization\_ALL

|          |                   |          |
|----------|-------------------|----------|
| 0.000001 | NM-K_not_in_group | 0.000009 |
| 0        | NM-K_not_in_group | 0        |
| 0        | NM-K_not_in_group | 0        |
| 0.203279 | NM-K_not_in_group | 0        |
| 0.075758 | NM-K_not_in_group | 0        |
| 0        | NM-K_not_in_group | 0        |
| 0.321412 | NM-K_not_in_group | 0        |
| 0        | NM-K_not_in_group | 0        |
| 0        | NM-K_not_in_group | 0        |
| 0        | NM-K_not_in_group | 0        |
